# Supplementary material for: GSK3β regulates epithelial-mesenchymal transition and cancer stem cell properties in triple-negative breast cancer
Source: PubMed Central journal article supplement (PMC6407242; doi:10.1186/s13058-019-1125-0), 2019-03-07

Supplementary Figure 6

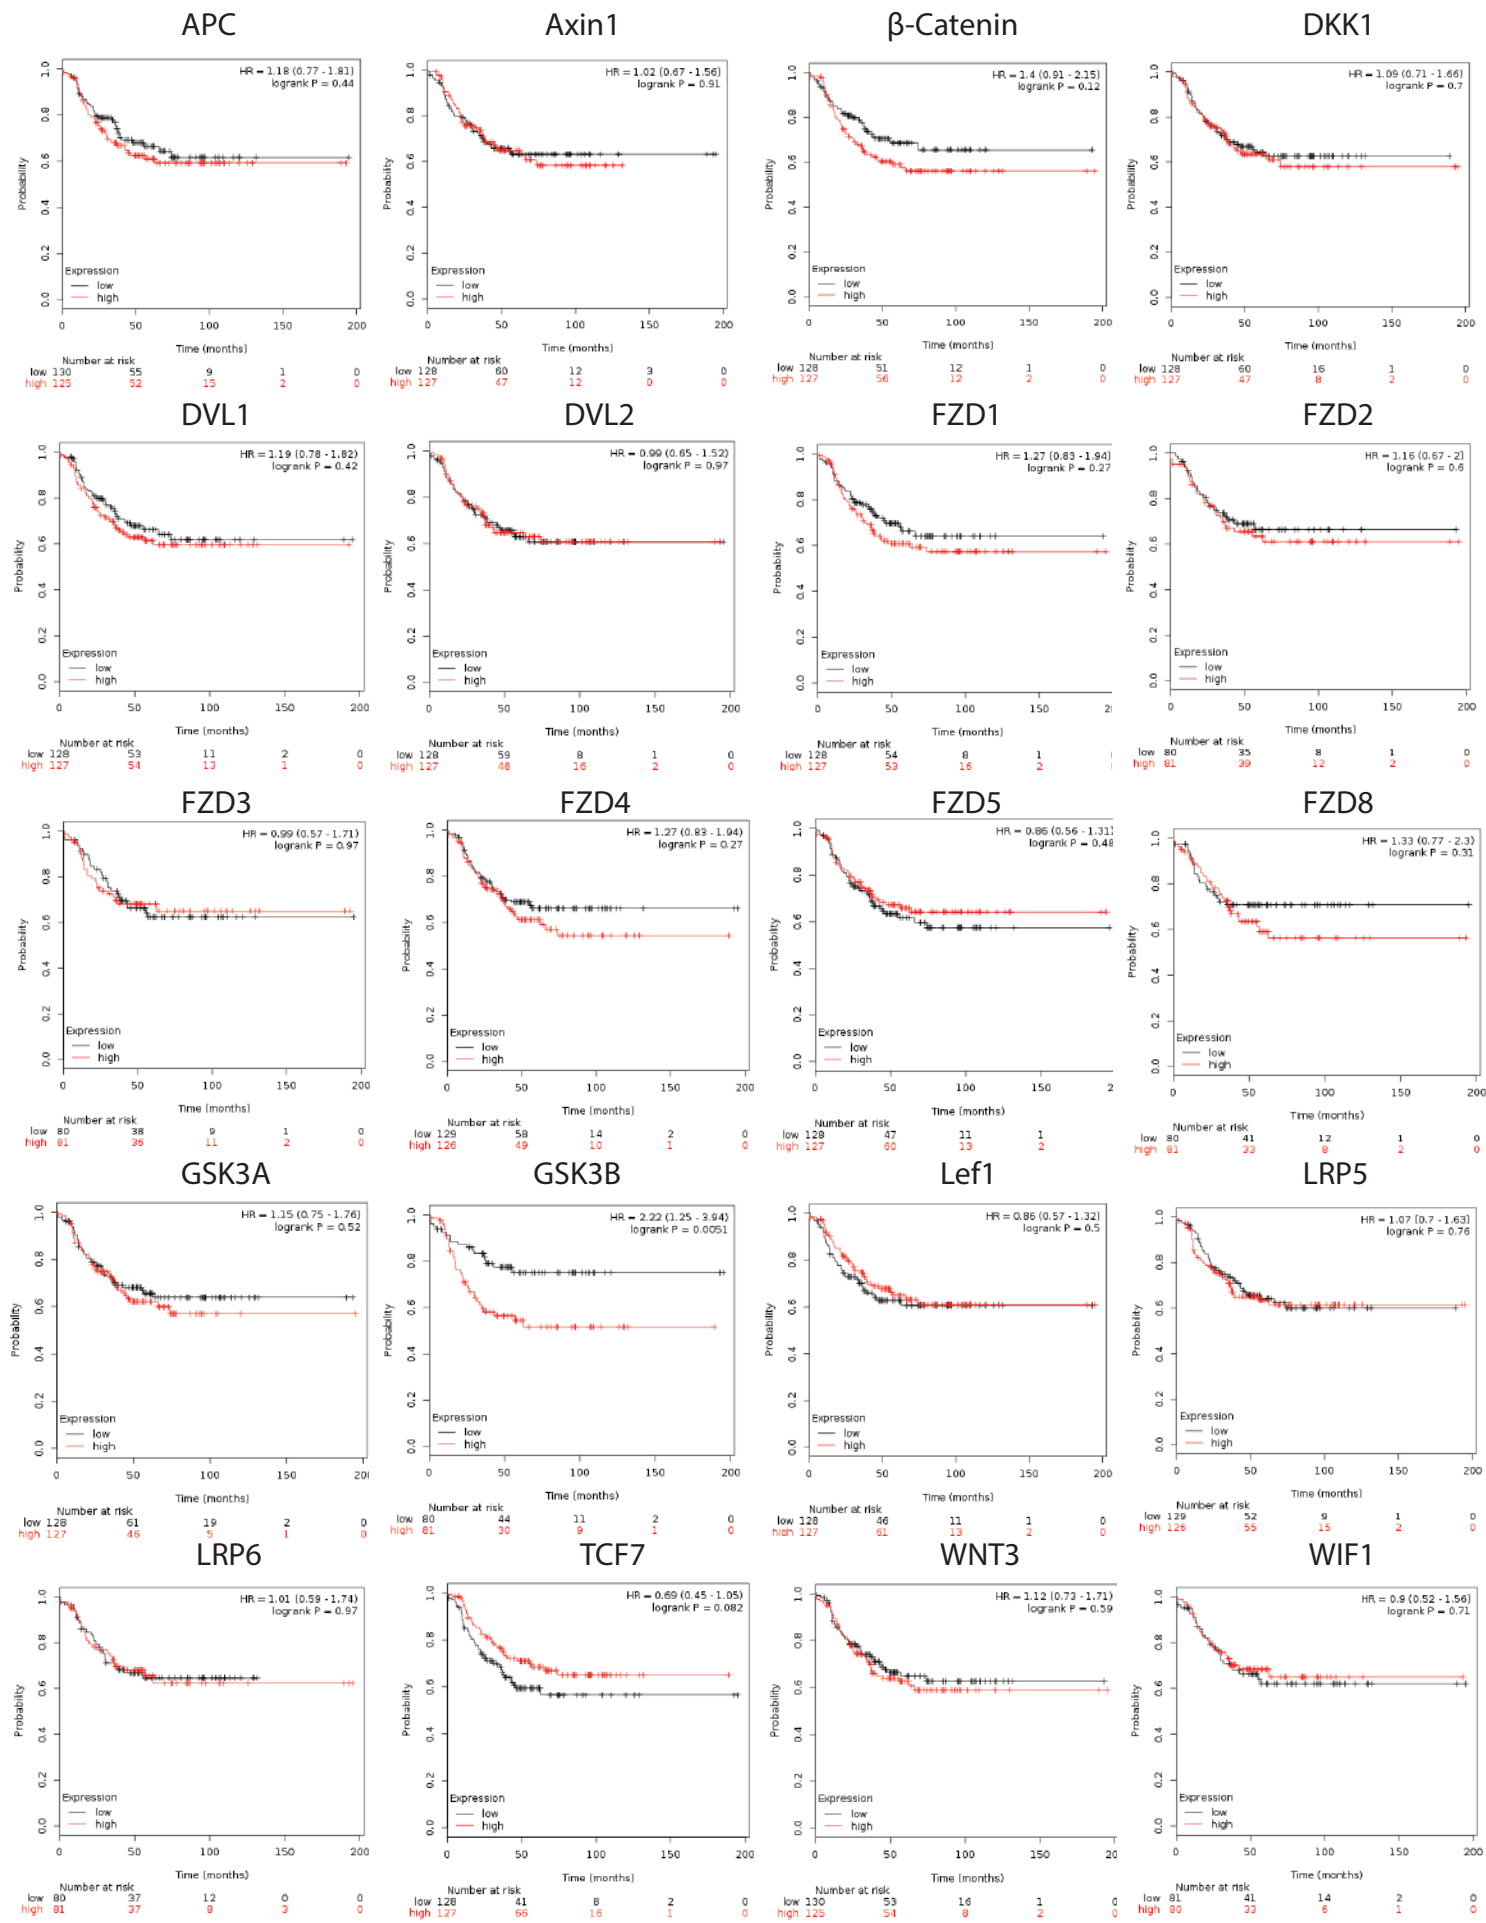

Supplement: 13058_2019_1125_MOESM8_ESM.pdf [file 13058_2019_1125_MOESM8_ESM.pdf]
