# Supplementary material for: GSK3β regulates epithelial-mesenchymal transition and cancer stem cell properties in triple-negative breast cancer
Source: Springer Nature journal article supplement (doi:10.1186/s13058-019-1125-0), 2019-03-07
Supplement: MOESM2 [file 16532720]

**Selleck 01 (Replicate A)**

Percent Green Cells

Percent Red Cells

10  $\mu$ M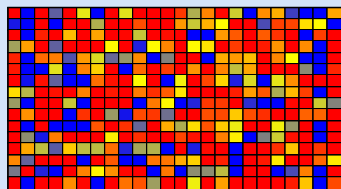10  $\mu$ M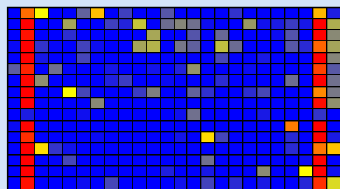1  $\mu$ M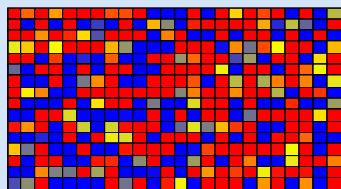1  $\mu$ M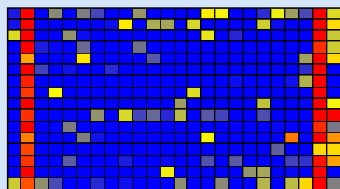0.1  $\mu$ M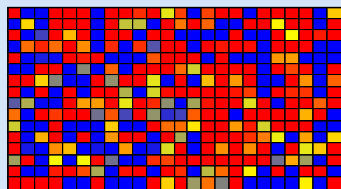0.1  $\mu$ M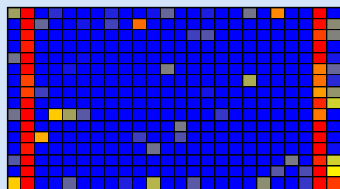**Selleck 01 (Replicate B)**

Percent Green Cells

Percent Red Cells

10  $\mu$ M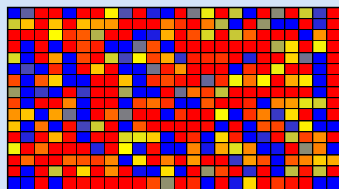10  $\mu$ M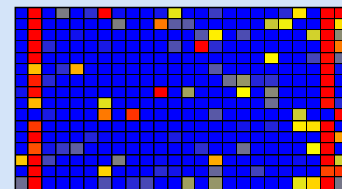1  $\mu$ M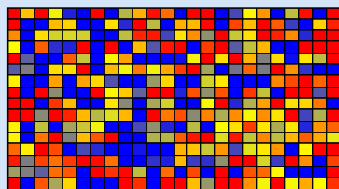1  $\mu$ M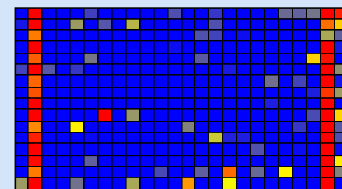0.1  $\mu$ M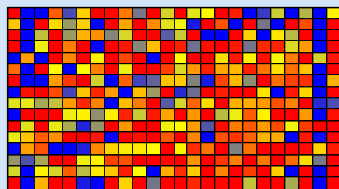0.1  $\mu$ M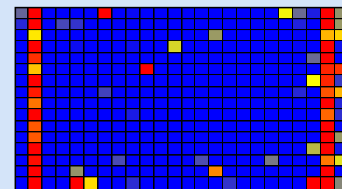**Selleck 02 (Replicate A)**

Percent Green Cells

Percent Red Cells

10  $\mu$ M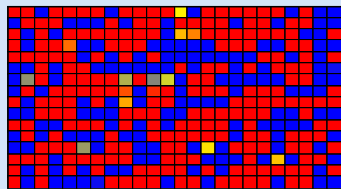10  $\mu$ M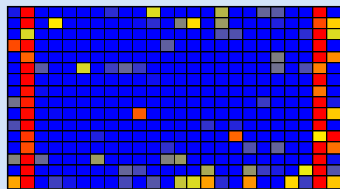1  $\mu$ M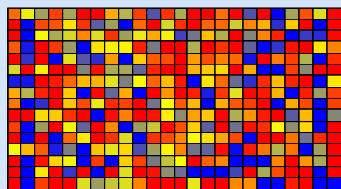1  $\mu$ M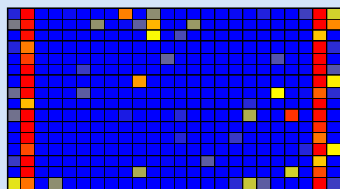0.1  $\mu$ M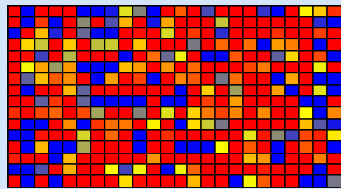0.1  $\mu$ M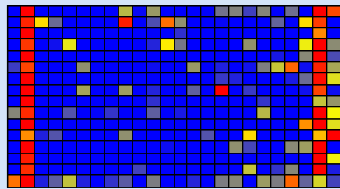**Selleck 02 (Replicate B)**

Percent Green Cells

Percent Red Cells

10  $\mu$ M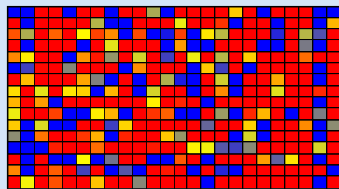10  $\mu$ M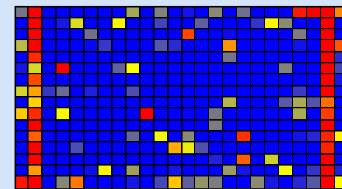1  $\mu$ M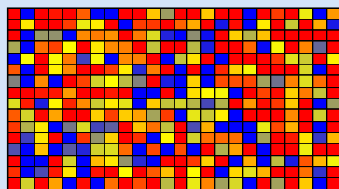1  $\mu$ M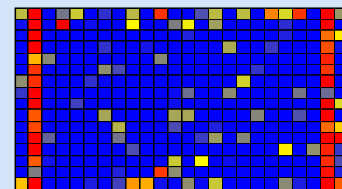0.1  $\mu$ M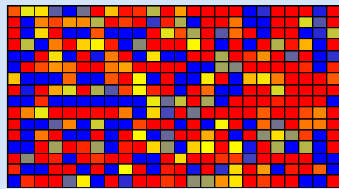0.1  $\mu$ M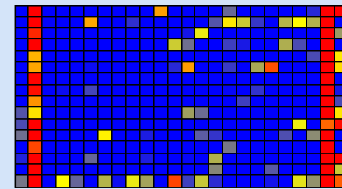**Selleck 03 (Replicate A)****Selleck 03 (Replicate B)**

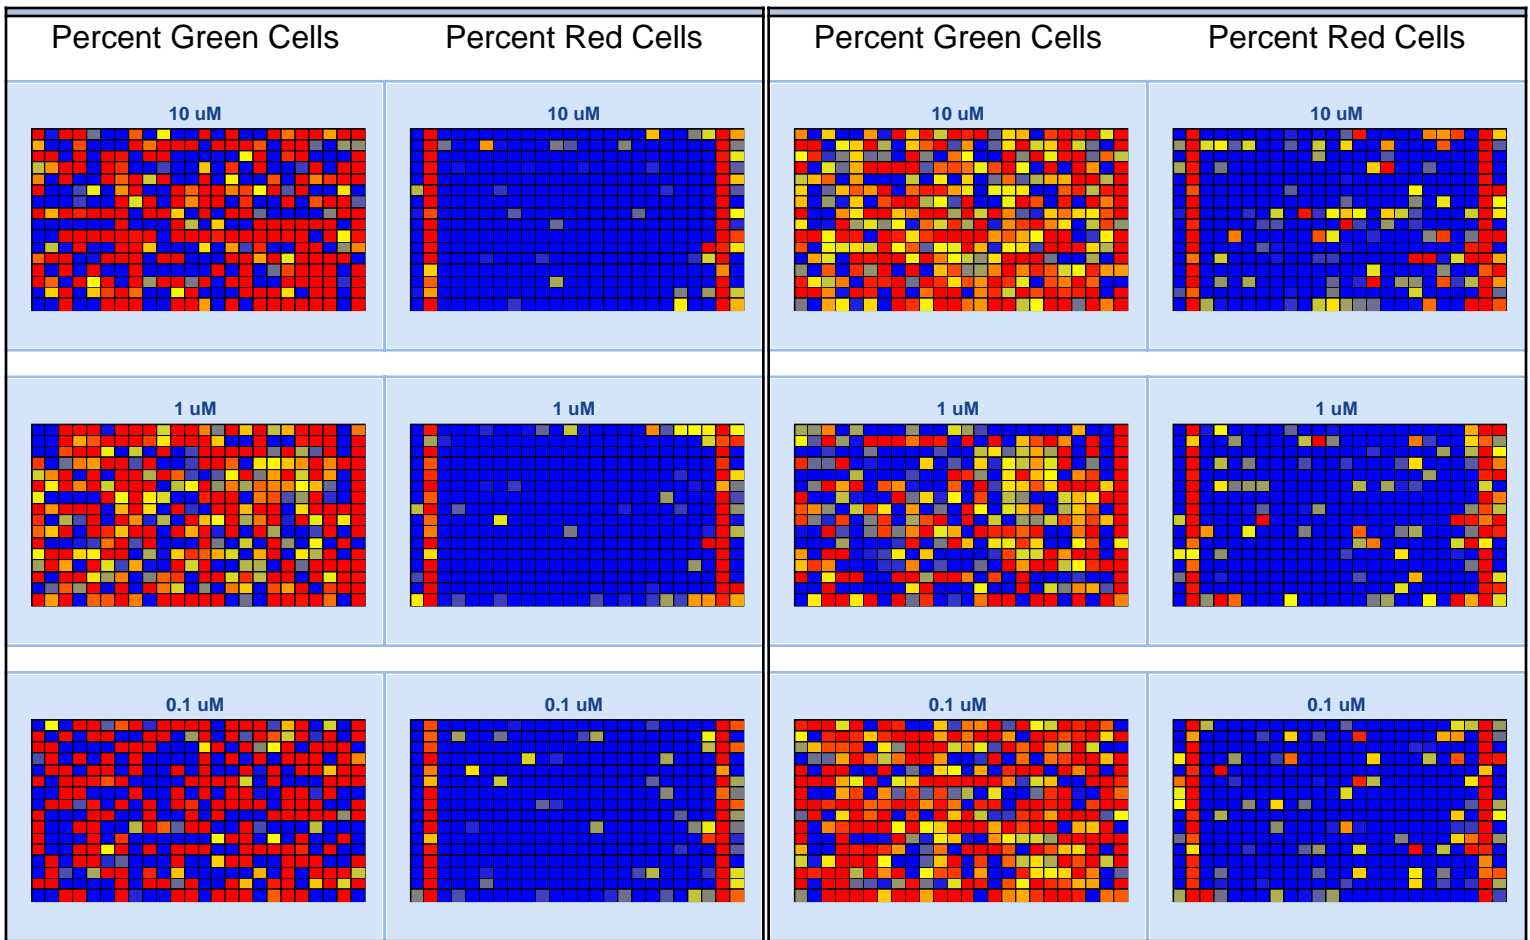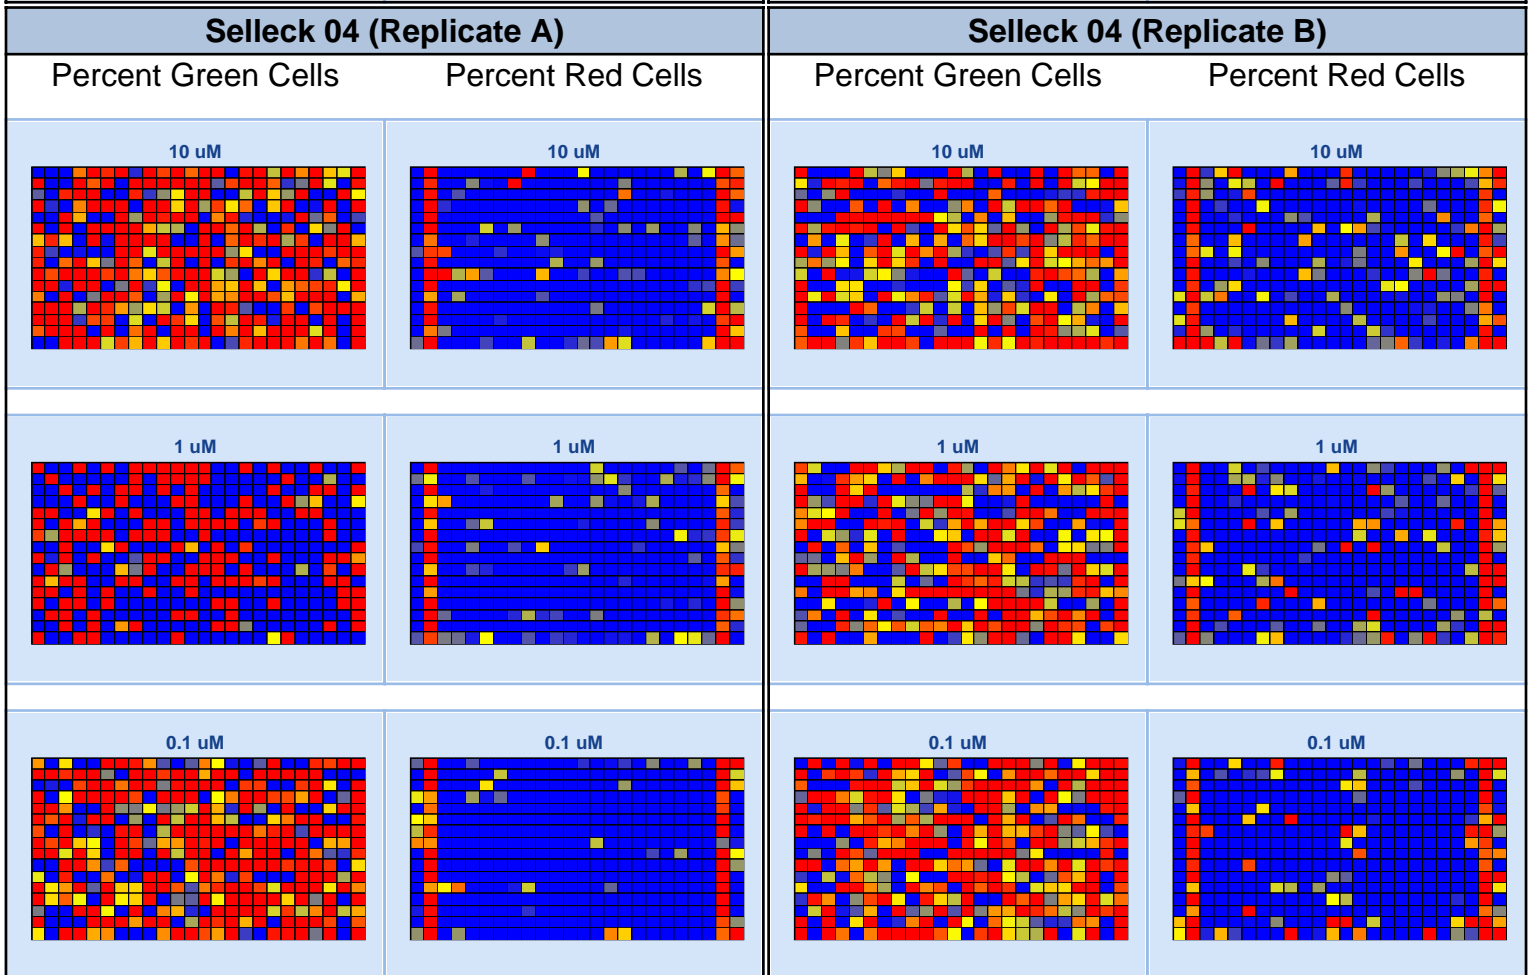

Compound

Normalized Values (A and B Sets)

Responses

| (+)-JQ1 |        |      | Average Response |              |                        |                            |            |                      |                          |
|---------|--------|------|------------------|--------------|------------------------|----------------------------|------------|----------------------|--------------------------|
|         |        |      | Dose             | Green Signal | Actual Pct Green Cells | Normalized Pct Green Cells | Red Signal | Actual Pct Red Cells | Normalized Pct Red Cells |
|         |        |      | 0.1 uM           | 105.55       | 0.91                   | 121.74                     | 92.28      | 0.09                 | -15.20                   |
|         |        |      | 1 uM             | 104.84       | 0.81                   | 66.52                      | 105.09     | 0.14                 | 5.37                     |
| 10 uM   | 110.68 | 0.91 | 121.48           | 110.60       | 0.16                   | 22.19                      |            |                      |                          |

Compound

Normalized Values (A and B Sets)

Responses

| (+)-Matrine |       |      | Average Response |              |                        |                            |            |                      |                          |
|-------------|-------|------|------------------|--------------|------------------------|----------------------------|------------|----------------------|--------------------------|
|             |       |      | Dose             | Green Signal | Actual Pct Green Cells | Normalized Pct Green Cells | Red Signal | Actual Pct Red Cells | Normalized Pct Red Cells |
|             |       |      | 0.1 uM           | 64.09        | 0.55                   | -282.88                    | 70.34      | 0.00                 | -53.50                   |
|             |       |      | 1 uM             | 92.16        | 0.81                   | 46.80                      | 85.27      | 0.06                 | -31.22                   |
| 10 uM       | 93.24 | 0.89 | 2.15             | 67.27        | 0.01                   | -52.43                     |            |                      |                          |

Compound

Normalized Values (A and B Sets)

Responses

| (+)-Usniacin |        |      | Average Response |              |                        |                            |            |                      |                          |
|--------------|--------|------|------------------|--------------|------------------------|----------------------------|------------|----------------------|--------------------------|
|              |        |      | Dose             | Green Signal | Actual Pct Green Cells | Normalized Pct Green Cells | Red Signal | Actual Pct Red Cells | Normalized Pct Red Cells |
|              |        |      | 0.1 uM           | 109.91       | 0.94                   | 150.76                     | 107.19     | 0.12                 | 2.66                     |
|              |        |      | 1 uM             | 113.16       | 0.93                   | 116.02                     | 84.71      | 0.06                 | -29.83                   |
| 10 uM        | 111.48 | 0.94 | 241.09           | 99.31        | 0.10                   | -12.35                     |            |                      |                          |

Compound

Normalized Values (A and B Sets)

Responses

| (-)-Blebbistatin |       |      | Average Response |              |                        |                            |            |                      |                          |
|------------------|-------|------|------------------|--------------|------------------------|----------------------------|------------|----------------------|--------------------------|
|                  |       |      | Dose             | Green Signal | Actual Pct Green Cells | Normalized Pct Green Cells | Red Signal | Actual Pct Red Cells | Normalized Pct Red Cells |
|                  |       |      | 0.1 uM           | 97.79        | 0.85                   | -11.32                     | 97.68      | 0.14                 | 7.69                     |
|                  |       |      | 1 uM             | 99.85        | 0.89                   | 123.67                     | 61.42      | 0.03                 | -51.94                   |
| 10 uM            | 91.91 | 0.77 | -13.51           | 89.46        | 0.08                   | -20.87                     |            |                      |                          |

Compound

Normalized Values (A and B Sets)

Responses

| (-)-Parthenolide |       |      | Average Response |              |                        |                            |            |                      |                          |
|------------------|-------|------|------------------|--------------|------------------------|----------------------------|------------|----------------------|--------------------------|
|                  |       |      | Dose             | Green Signal | Actual Pct Green Cells | Normalized Pct Green Cells | Red Signal | Actual Pct Red Cells | Normalized Pct Red Cells |
|                  |       |      | 0.1 uM           | 84.30        | 0.74                   | -74.80                     | 86.93      | 0.06                 | -27.69                   |
|                  |       |      | 1 uM             | 96.57        | 0.82                   | 53.34                      | 79.48      | 0.03                 | -40.97                   |
| 10 uM            | 88.96 | 0.79 | 607.00           | 95.49        | 0.10                   | -9.31                      |            |                      |                          |

| Compound                       | Normalized Values (A and B Sets) | Responses                                                                                                                                                                                                                                                                                                                                                                                                                                                                                                                                                                                                                                                                         |                  |                        |                            |            |                      |                          |  |      |              |                        |                            |            |                      |                          |        |       |      |       |       |      |        |      |        |      |        |       |      |        |       |        |      |       |       |      |        |
|--------------------------------|----------------------------------|-----------------------------------------------------------------------------------------------------------------------------------------------------------------------------------------------------------------------------------------------------------------------------------------------------------------------------------------------------------------------------------------------------------------------------------------------------------------------------------------------------------------------------------------------------------------------------------------------------------------------------------------------------------------------------------|------------------|------------------------|----------------------------|------------|----------------------|--------------------------|--|------|--------------|------------------------|----------------------------|------------|----------------------|--------------------------|--------|-------|------|-------|-------|------|--------|------|--------|------|--------|-------|------|--------|-------|--------|------|-------|-------|------|--------|
| <b>1,4PBITU duhydrobromide</b> |                                  | <table border="1"> <thead> <tr> <th colspan="7">Average Response</th> </tr> <tr> <th>Dose</th> <th>Green Signal</th> <th>Actual Pct Green Cells</th> <th>Normalized Pct Green Cells</th> <th>Red Signal</th> <th>Actual Pct Red Cells</th> <th>Normalized Pct Red Cells</th> </tr> </thead> <tbody> <tr> <td>0.1 uM</td> <td>96.25</td> <td>0.89</td> <td>96.49</td> <td>84.28</td> <td>0.05</td> <td>-41.84</td> </tr> <tr> <td>1 uM</td> <td>102.49</td> <td>0.91</td> <td>266.19</td> <td>55.38</td> <td>0.01</td> <td>-42.85</td> </tr> <tr> <td>10 uM</td> <td>107.11</td> <td>0.90</td> <td>86.46</td> <td>64.82</td> <td>0.02</td> <td>-40.96</td> </tr> </tbody> </table> | Average Response |                        |                            |            |                      |                          |  | Dose | Green Signal | Actual Pct Green Cells | Normalized Pct Green Cells | Red Signal | Actual Pct Red Cells | Normalized Pct Red Cells | 0.1 uM | 96.25 | 0.89 | 96.49 | 84.28 | 0.05 | -41.84 | 1 uM | 102.49 | 0.91 | 266.19 | 55.38 | 0.01 | -42.85 | 10 uM | 107.11 | 0.90 | 86.46 | 64.82 | 0.02 | -40.96 |
|                                |                                  | Average Response                                                                                                                                                                                                                                                                                                                                                                                                                                                                                                                                                                                                                                                                  |                  |                        |                            |            |                      |                          |  |      |              |                        |                            |            |                      |                          |        |       |      |       |       |      |        |      |        |      |        |       |      |        |       |        |      |       |       |      |        |
|                                |                                  | Dose                                                                                                                                                                                                                                                                                                                                                                                                                                                                                                                                                                                                                                                                              | Green Signal     | Actual Pct Green Cells | Normalized Pct Green Cells | Red Signal | Actual Pct Red Cells | Normalized Pct Red Cells |  |      |              |                        |                            |            |                      |                          |        |       |      |       |       |      |        |      |        |      |        |       |      |        |       |        |      |       |       |      |        |
|                                |                                  | 0.1 uM                                                                                                                                                                                                                                                                                                                                                                                                                                                                                                                                                                                                                                                                            | 96.25            | 0.89                   | 96.49                      | 84.28      | 0.05                 | -41.84                   |  |      |              |                        |                            |            |                      |                          |        |       |      |       |       |      |        |      |        |      |        |       |      |        |       |        |      |       |       |      |        |
| 1 uM                           | 102.49                           | 0.91                                                                                                                                                                                                                                                                                                                                                                                                                                                                                                                                                                                                                                                                              | 266.19           | 55.38                  | 0.01                       | -42.85     |                      |                          |  |      |              |                        |                            |            |                      |                          |        |       |      |       |       |      |        |      |        |      |        |       |      |        |       |        |      |       |       |      |        |
| 10 uM                          | 107.11                           | 0.90                                                                                                                                                                                                                                                                                                                                                                                                                                                                                                                                                                                                                                                                              | 86.46            | 64.82                  | 0.02                       | -40.96     |                      |                          |  |      |              |                        |                            |            |                      |                          |        |       |      |       |       |      |        |      |        |      |        |       |      |        |       |        |      |       |       |      |        |

| Compound             | Normalized Values (A and B Sets) | Responses                                                                                                                                                                                                                                                                                                                                                                                                                                                                                                                                                                                                                                                                          |                  |                        |                            |            |                      |                          |  |      |              |                        |                            |            |                      |                          |        |        |      |        |       |      |        |      |       |      |        |       |      |       |       |        |      |        |       |      |        |
|----------------------|----------------------------------|------------------------------------------------------------------------------------------------------------------------------------------------------------------------------------------------------------------------------------------------------------------------------------------------------------------------------------------------------------------------------------------------------------------------------------------------------------------------------------------------------------------------------------------------------------------------------------------------------------------------------------------------------------------------------------|------------------|------------------------|----------------------------|------------|----------------------|--------------------------|--|------|--------------|------------------------|----------------------------|------------|----------------------|--------------------------|--------|--------|------|--------|-------|------|--------|------|-------|------|--------|-------|------|-------|-------|--------|------|--------|-------|------|--------|
| <b>1-Hexadecanol</b> |                                  | <table border="1"> <thead> <tr> <th colspan="7">Average Response</th> </tr> <tr> <th>Dose</th> <th>Green Signal</th> <th>Actual Pct Green Cells</th> <th>Normalized Pct Green Cells</th> <th>Red Signal</th> <th>Actual Pct Red Cells</th> <th>Normalized Pct Red Cells</th> </tr> </thead> <tbody> <tr> <td>0.1 uM</td> <td>100.31</td> <td>0.90</td> <td>108.70</td> <td>94.72</td> <td>0.09</td> <td>-22.39</td> </tr> <tr> <td>1 uM</td> <td>90.32</td> <td>0.81</td> <td>443.80</td> <td>89.90</td> <td>0.08</td> <td>-9.33</td> </tr> <tr> <td>10 uM</td> <td>108.15</td> <td>0.93</td> <td>115.10</td> <td>89.40</td> <td>0.09</td> <td>-10.78</td> </tr> </tbody> </table> | Average Response |                        |                            |            |                      |                          |  | Dose | Green Signal | Actual Pct Green Cells | Normalized Pct Green Cells | Red Signal | Actual Pct Red Cells | Normalized Pct Red Cells | 0.1 uM | 100.31 | 0.90 | 108.70 | 94.72 | 0.09 | -22.39 | 1 uM | 90.32 | 0.81 | 443.80 | 89.90 | 0.08 | -9.33 | 10 uM | 108.15 | 0.93 | 115.10 | 89.40 | 0.09 | -10.78 |
|                      |                                  | Average Response                                                                                                                                                                                                                                                                                                                                                                                                                                                                                                                                                                                                                                                                   |                  |                        |                            |            |                      |                          |  |      |              |                        |                            |            |                      |                          |        |        |      |        |       |      |        |      |       |      |        |       |      |       |       |        |      |        |       |      |        |
|                      |                                  | Dose                                                                                                                                                                                                                                                                                                                                                                                                                                                                                                                                                                                                                                                                               | Green Signal     | Actual Pct Green Cells | Normalized Pct Green Cells | Red Signal | Actual Pct Red Cells | Normalized Pct Red Cells |  |      |              |                        |                            |            |                      |                          |        |        |      |        |       |      |        |      |       |      |        |       |      |       |       |        |      |        |       |      |        |
|                      |                                  | 0.1 uM                                                                                                                                                                                                                                                                                                                                                                                                                                                                                                                                                                                                                                                                             | 100.31           | 0.90                   | 108.70                     | 94.72      | 0.09                 | -22.39                   |  |      |              |                        |                            |            |                      |                          |        |        |      |        |       |      |        |      |       |      |        |       |      |       |       |        |      |        |       |      |        |
| 1 uM                 | 90.32                            | 0.81                                                                                                                                                                                                                                                                                                                                                                                                                                                                                                                                                                                                                                                                               | 443.80           | 89.90                  | 0.08                       | -9.33      |                      |                          |  |      |              |                        |                            |            |                      |                          |        |        |      |        |       |      |        |      |       |      |        |       |      |       |       |        |      |        |       |      |        |
| 10 uM                | 108.15                           | 0.93                                                                                                                                                                                                                                                                                                                                                                                                                                                                                                                                                                                                                                                                               | 115.10           | 89.40                  | 0.09                       | -10.78     |                      |                          |  |      |              |                        |                            |            |                      |                          |        |        |      |        |       |      |        |      |       |      |        |       |      |       |       |        |      |        |       |      |        |

| Compound                            | Normalized Values (A and B Sets) | Responses                                                                                                                                                                                                                                                                                                                                                                                                                                                                                                                                                                                                                                                                         |                  |                        |                            |            |                      |                          |  |      |              |                        |                            |            |                      |                          |        |       |      |        |       |      |        |      |       |      |        |       |      |        |       |        |      |       |        |      |       |
|-------------------------------------|----------------------------------|-----------------------------------------------------------------------------------------------------------------------------------------------------------------------------------------------------------------------------------------------------------------------------------------------------------------------------------------------------------------------------------------------------------------------------------------------------------------------------------------------------------------------------------------------------------------------------------------------------------------------------------------------------------------------------------|------------------|------------------------|----------------------------|------------|----------------------|--------------------------|--|------|--------------|------------------------|----------------------------|------------|----------------------|--------------------------|--------|-------|------|--------|-------|------|--------|------|-------|------|--------|-------|------|--------|-------|--------|------|-------|--------|------|-------|
| <b>2-Methoxyestradiol (2-MeOE2)</b> |                                  | <table border="1"> <thead> <tr> <th colspan="7">Average Response</th> </tr> <tr> <th>Dose</th> <th>Green Signal</th> <th>Actual Pct Green Cells</th> <th>Normalized Pct Green Cells</th> <th>Red Signal</th> <th>Actual Pct Red Cells</th> <th>Normalized Pct Red Cells</th> </tr> </thead> <tbody> <tr> <td>0.1 uM</td> <td>74.87</td> <td>0.61</td> <td>-71.04</td> <td>69.72</td> <td>0.02</td> <td>-63.87</td> </tr> <tr> <td>1 uM</td> <td>96.86</td> <td>0.79</td> <td>-64.96</td> <td>89.72</td> <td>0.06</td> <td>-29.55</td> </tr> <tr> <td>10 uM</td> <td>115.96</td> <td>0.84</td> <td>84.01</td> <td>120.78</td> <td>0.15</td> <td>10.81</td> </tr> </tbody> </table> | Average Response |                        |                            |            |                      |                          |  | Dose | Green Signal | Actual Pct Green Cells | Normalized Pct Green Cells | Red Signal | Actual Pct Red Cells | Normalized Pct Red Cells | 0.1 uM | 74.87 | 0.61 | -71.04 | 69.72 | 0.02 | -63.87 | 1 uM | 96.86 | 0.79 | -64.96 | 89.72 | 0.06 | -29.55 | 10 uM | 115.96 | 0.84 | 84.01 | 120.78 | 0.15 | 10.81 |
|                                     |                                  | Average Response                                                                                                                                                                                                                                                                                                                                                                                                                                                                                                                                                                                                                                                                  |                  |                        |                            |            |                      |                          |  |      |              |                        |                            |            |                      |                          |        |       |      |        |       |      |        |      |       |      |        |       |      |        |       |        |      |       |        |      |       |
|                                     |                                  | Dose                                                                                                                                                                                                                                                                                                                                                                                                                                                                                                                                                                                                                                                                              | Green Signal     | Actual Pct Green Cells | Normalized Pct Green Cells | Red Signal | Actual Pct Red Cells | Normalized Pct Red Cells |  |      |              |                        |                            |            |                      |                          |        |       |      |        |       |      |        |      |       |      |        |       |      |        |       |        |      |       |        |      |       |
|                                     |                                  | 0.1 uM                                                                                                                                                                                                                                                                                                                                                                                                                                                                                                                                                                                                                                                                            | 74.87            | 0.61                   | -71.04                     | 69.72      | 0.02                 | -63.87                   |  |      |              |                        |                            |            |                      |                          |        |       |      |        |       |      |        |      |       |      |        |       |      |        |       |        |      |       |        |      |       |
| 1 uM                                | 96.86                            | 0.79                                                                                                                                                                                                                                                                                                                                                                                                                                                                                                                                                                                                                                                                              | -64.96           | 89.72                  | 0.06                       | -29.55     |                      |                          |  |      |              |                        |                            |            |                      |                          |        |       |      |        |       |      |        |      |       |      |        |       |      |        |       |        |      |       |        |      |       |
| 10 uM                               | 115.96                           | 0.84                                                                                                                                                                                                                                                                                                                                                                                                                                                                                                                                                                                                                                                                              | 84.01            | 120.78                 | 0.15                       | 10.81      |                      |                          |  |      |              |                        |                            |            |                      |                          |        |       |      |        |       |      |        |      |       |      |        |       |      |        |       |        |      |       |        |      |       |

| Compound            | Normalized Values (A and B Sets) | Responses                                                                                                                                                                                                                                                                                                                                                                                                                                                                                                                                                                                                                                                                       |                  |                        |                            |            |                      |                          |  |      |              |                        |                            |            |                      |                          |        |       |      |       |       |      |        |      |       |      |        |       |      |        |       |       |      |       |       |      |        |
|---------------------|----------------------------------|---------------------------------------------------------------------------------------------------------------------------------------------------------------------------------------------------------------------------------------------------------------------------------------------------------------------------------------------------------------------------------------------------------------------------------------------------------------------------------------------------------------------------------------------------------------------------------------------------------------------------------------------------------------------------------|------------------|------------------------|----------------------------|------------|----------------------|--------------------------|--|------|--------------|------------------------|----------------------------|------------|----------------------|--------------------------|--------|-------|------|-------|-------|------|--------|------|-------|------|--------|-------|------|--------|-------|-------|------|-------|-------|------|--------|
| <b>2-Thiouracil</b> |                                  | <table border="1"> <thead> <tr> <th colspan="7">Average Response</th> </tr> <tr> <th>Dose</th> <th>Green Signal</th> <th>Actual Pct Green Cells</th> <th>Normalized Pct Green Cells</th> <th>Red Signal</th> <th>Actual Pct Red Cells</th> <th>Normalized Pct Red Cells</th> </tr> </thead> <tbody> <tr> <td>0.1 uM</td> <td>95.54</td> <td>0.86</td> <td>73.42</td> <td>80.10</td> <td>0.03</td> <td>-57.81</td> </tr> <tr> <td>1 uM</td> <td>95.11</td> <td>0.87</td> <td>222.75</td> <td>71.31</td> <td>0.03</td> <td>-38.30</td> </tr> <tr> <td>10 uM</td> <td>92.38</td> <td>0.86</td> <td>44.40</td> <td>81.59</td> <td>0.06</td> <td>-26.38</td> </tr> </tbody> </table> | Average Response |                        |                            |            |                      |                          |  | Dose | Green Signal | Actual Pct Green Cells | Normalized Pct Green Cells | Red Signal | Actual Pct Red Cells | Normalized Pct Red Cells | 0.1 uM | 95.54 | 0.86 | 73.42 | 80.10 | 0.03 | -57.81 | 1 uM | 95.11 | 0.87 | 222.75 | 71.31 | 0.03 | -38.30 | 10 uM | 92.38 | 0.86 | 44.40 | 81.59 | 0.06 | -26.38 |
|                     |                                  | Average Response                                                                                                                                                                                                                                                                                                                                                                                                                                                                                                                                                                                                                                                                |                  |                        |                            |            |                      |                          |  |      |              |                        |                            |            |                      |                          |        |       |      |       |       |      |        |      |       |      |        |       |      |        |       |       |      |       |       |      |        |
|                     |                                  | Dose                                                                                                                                                                                                                                                                                                                                                                                                                                                                                                                                                                                                                                                                            | Green Signal     | Actual Pct Green Cells | Normalized Pct Green Cells | Red Signal | Actual Pct Red Cells | Normalized Pct Red Cells |  |      |              |                        |                            |            |                      |                          |        |       |      |       |       |      |        |      |       |      |        |       |      |        |       |       |      |       |       |      |        |
|                     |                                  | 0.1 uM                                                                                                                                                                                                                                                                                                                                                                                                                                                                                                                                                                                                                                                                          | 95.54            | 0.86                   | 73.42                      | 80.10      | 0.03                 | -57.81                   |  |      |              |                        |                            |            |                      |                          |        |       |      |       |       |      |        |      |       |      |        |       |      |        |       |       |      |       |       |      |        |
| 1 uM                | 95.11                            | 0.87                                                                                                                                                                                                                                                                                                                                                                                                                                                                                                                                                                                                                                                                            | 222.75           | 71.31                  | 0.03                       | -38.30     |                      |                          |  |      |              |                        |                            |            |                      |                          |        |       |      |       |       |      |        |      |       |      |        |       |      |        |       |       |      |       |       |      |        |
| 10 uM               | 92.38                            | 0.86                                                                                                                                                                                                                                                                                                                                                                                                                                                                                                                                                                                                                                                                            | 44.40            | 81.59                  | 0.06                       | -26.38     |                      |                          |  |      |              |                        |                            |            |                      |                          |        |       |      |       |       |      |        |      |       |      |        |       |      |        |       |       |      |       |       |      |        |

| Compound                           | Normalized Values (A and B Sets) | Responses                                                                                                                                                                                                                                                                                                                                                                                                                                                                                                                                                                                                                                                                        |                  |                        |                            |            |                      |                          |  |      |              |                        |                            |            |                      |                          |        |        |      |        |        |      |       |      |        |      |       |       |      |       |       |       |      |       |       |      |        |
|------------------------------------|----------------------------------|----------------------------------------------------------------------------------------------------------------------------------------------------------------------------------------------------------------------------------------------------------------------------------------------------------------------------------------------------------------------------------------------------------------------------------------------------------------------------------------------------------------------------------------------------------------------------------------------------------------------------------------------------------------------------------|------------------|------------------------|----------------------------|------------|----------------------|--------------------------|--|------|--------------|------------------------|----------------------------|------------|----------------------|--------------------------|--------|--------|------|--------|--------|------|-------|------|--------|------|-------|-------|------|-------|-------|-------|------|-------|-------|------|--------|
| <b>3-Deazaneplanocin A (DZNeP)</b> |                                  | <table border="1"> <thead> <tr> <th colspan="7">Average Response</th> </tr> <tr> <th>Dose</th> <th>Green Signal</th> <th>Actual Pct Green Cells</th> <th>Normalized Pct Green Cells</th> <th>Red Signal</th> <th>Actual Pct Red Cells</th> <th>Normalized Pct Red Cells</th> </tr> </thead> <tbody> <tr> <td>0.1 uM</td> <td>111.18</td> <td>0.94</td> <td>215.79</td> <td>112.43</td> <td>0.20</td> <td>38.42</td> </tr> <tr> <td>1 uM</td> <td>105.58</td> <td>0.82</td> <td>75.30</td> <td>96.59</td> <td>0.12</td> <td>-6.57</td> </tr> <tr> <td>10 uM</td> <td>90.94</td> <td>0.72</td> <td>43.36</td> <td>84.92</td> <td>0.07</td> <td>-27.71</td> </tr> </tbody> </table> | Average Response |                        |                            |            |                      |                          |  | Dose | Green Signal | Actual Pct Green Cells | Normalized Pct Green Cells | Red Signal | Actual Pct Red Cells | Normalized Pct Red Cells | 0.1 uM | 111.18 | 0.94 | 215.79 | 112.43 | 0.20 | 38.42 | 1 uM | 105.58 | 0.82 | 75.30 | 96.59 | 0.12 | -6.57 | 10 uM | 90.94 | 0.72 | 43.36 | 84.92 | 0.07 | -27.71 |
|                                    |                                  | Average Response                                                                                                                                                                                                                                                                                                                                                                                                                                                                                                                                                                                                                                                                 |                  |                        |                            |            |                      |                          |  |      |              |                        |                            |            |                      |                          |        |        |      |        |        |      |       |      |        |      |       |       |      |       |       |       |      |       |       |      |        |
|                                    |                                  | Dose                                                                                                                                                                                                                                                                                                                                                                                                                                                                                                                                                                                                                                                                             | Green Signal     | Actual Pct Green Cells | Normalized Pct Green Cells | Red Signal | Actual Pct Red Cells | Normalized Pct Red Cells |  |      |              |                        |                            |            |                      |                          |        |        |      |        |        |      |       |      |        |      |       |       |      |       |       |       |      |       |       |      |        |
|                                    |                                  | 0.1 uM                                                                                                                                                                                                                                                                                                                                                                                                                                                                                                                                                                                                                                                                           | 111.18           | 0.94                   | 215.79                     | 112.43     | 0.20                 | 38.42                    |  |      |              |                        |                            |            |                      |                          |        |        |      |        |        |      |       |      |        |      |       |       |      |       |       |       |      |       |       |      |        |
| 1 uM                               | 105.58                           | 0.82                                                                                                                                                                                                                                                                                                                                                                                                                                                                                                                                                                                                                                                                             | 75.30            | 96.59                  | 0.12                       | -6.57      |                      |                          |  |      |              |                        |                            |            |                      |                          |        |        |      |        |        |      |       |      |        |      |       |       |      |       |       |       |      |       |       |      |        |
| 10 uM                              | 90.94                            | 0.72                                                                                                                                                                                                                                                                                                                                                                                                                                                                                                                                                                                                                                                                             | 43.36            | 84.92                  | 0.07                       | -27.71     |                      |                          |  |      |              |                        |                            |            |                      |                          |        |        |      |        |        |      |       |      |        |      |       |       |      |       |       |       |      |       |       |      |        |

| Compound                          | Normalized Values (A and B Sets)                                                   | Responses                                                                                                                                                                                                                                                                                                                                                                                                                                                                                                                                                                                                                                                                         |                  |                        |                            |            |                      |                          |  |      |              |                        |                            |            |                      |                          |        |        |      |        |       |      |        |      |       |      |       |       |      |        |       |       |      |        |       |      |        |
|-----------------------------------|------------------------------------------------------------------------------------|-----------------------------------------------------------------------------------------------------------------------------------------------------------------------------------------------------------------------------------------------------------------------------------------------------------------------------------------------------------------------------------------------------------------------------------------------------------------------------------------------------------------------------------------------------------------------------------------------------------------------------------------------------------------------------------|------------------|------------------------|----------------------------|------------|----------------------|--------------------------|--|------|--------------|------------------------|----------------------------|------------|----------------------|--------------------------|--------|--------|------|--------|-------|------|--------|------|-------|------|-------|-------|------|--------|-------|-------|------|--------|-------|------|--------|
| <b>3-Indolebutyric acid (IBA)</b> | 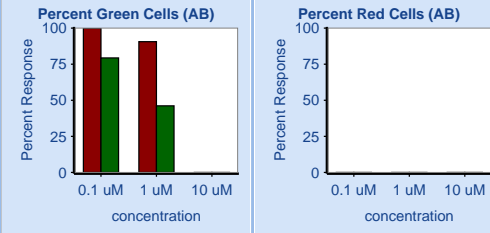 | <table border="1"> <thead> <tr> <th colspan="7">Average Response</th> </tr> <tr> <th>Dose</th> <th>Green Signal</th> <th>Actual Pct Green Cells</th> <th>Normalized Pct Green Cells</th> <th>Red Signal</th> <th>Actual Pct Red Cells</th> <th>Normalized Pct Red Cells</th> </tr> </thead> <tbody> <tr> <td>0.1 uM</td> <td>104.94</td> <td>0.91</td> <td>113.83</td> <td>76.11</td> <td>0.02</td> <td>-45.01</td> </tr> <tr> <td>1 uM</td> <td>95.98</td> <td>0.84</td> <td>68.38</td> <td>63.75</td> <td>0.01</td> <td>-52.13</td> </tr> <tr> <td>10 uM</td> <td>85.49</td> <td>0.80</td> <td>478.46</td> <td>99.98</td> <td>0.08</td> <td>-19.77</td> </tr> </tbody> </table> | Average Response |                        |                            |            |                      |                          |  | Dose | Green Signal | Actual Pct Green Cells | Normalized Pct Green Cells | Red Signal | Actual Pct Red Cells | Normalized Pct Red Cells | 0.1 uM | 104.94 | 0.91 | 113.83 | 76.11 | 0.02 | -45.01 | 1 uM | 95.98 | 0.84 | 68.38 | 63.75 | 0.01 | -52.13 | 10 uM | 85.49 | 0.80 | 478.46 | 99.98 | 0.08 | -19.77 |
|                                   |                                                                                    | Average Response                                                                                                                                                                                                                                                                                                                                                                                                                                                                                                                                                                                                                                                                  |                  |                        |                            |            |                      |                          |  |      |              |                        |                            |            |                      |                          |        |        |      |        |       |      |        |      |       |      |       |       |      |        |       |       |      |        |       |      |        |
|                                   |                                                                                    | Dose                                                                                                                                                                                                                                                                                                                                                                                                                                                                                                                                                                                                                                                                              | Green Signal     | Actual Pct Green Cells | Normalized Pct Green Cells | Red Signal | Actual Pct Red Cells | Normalized Pct Red Cells |  |      |              |                        |                            |            |                      |                          |        |        |      |        |       |      |        |      |       |      |       |       |      |        |       |       |      |        |       |      |        |
|                                   |                                                                                    | 0.1 uM                                                                                                                                                                                                                                                                                                                                                                                                                                                                                                                                                                                                                                                                            | 104.94           | 0.91                   | 113.83                     | 76.11      | 0.02                 | -45.01                   |  |      |              |                        |                            |            |                      |                          |        |        |      |        |       |      |        |      |       |      |       |       |      |        |       |       |      |        |       |      |        |
| 1 uM                              | 95.98                                                                              | 0.84                                                                                                                                                                                                                                                                                                                                                                                                                                                                                                                                                                                                                                                                              | 68.38            | 63.75                  | 0.01                       | -52.13     |                      |                          |  |      |              |                        |                            |            |                      |                          |        |        |      |        |       |      |        |      |       |      |       |       |      |        |       |       |      |        |       |      |        |
| 10 uM                             | 85.49                                                                              | 0.80                                                                                                                                                                                                                                                                                                                                                                                                                                                                                                                                                                                                                                                                              | 478.46           | 99.98                  | 0.08                       | -19.77     |                      |                          |  |      |              |                        |                            |            |                      |                          |        |        |      |        |       |      |        |      |       |      |       |       |      |        |       |       |      |        |       |      |        |

| Compound               | Normalized Values (A and B Sets)                                                   | Responses                                                                                                                                                                                                                                                                                                                                                                                                                                                                                                                                                                                                                                                                        |                  |                        |                            |            |                      |                          |  |      |              |                        |                            |            |                      |                          |        |       |      |        |       |      |        |      |       |      |       |       |      |        |       |       |      |        |       |      |        |
|------------------------|------------------------------------------------------------------------------------|----------------------------------------------------------------------------------------------------------------------------------------------------------------------------------------------------------------------------------------------------------------------------------------------------------------------------------------------------------------------------------------------------------------------------------------------------------------------------------------------------------------------------------------------------------------------------------------------------------------------------------------------------------------------------------|------------------|------------------------|----------------------------|------------|----------------------|--------------------------|--|------|--------------|------------------------|----------------------------|------------|----------------------|--------------------------|--------|-------|------|--------|-------|------|--------|------|-------|------|-------|-------|------|--------|-------|-------|------|--------|-------|------|--------|
| <b>3-Methyladenine</b> | 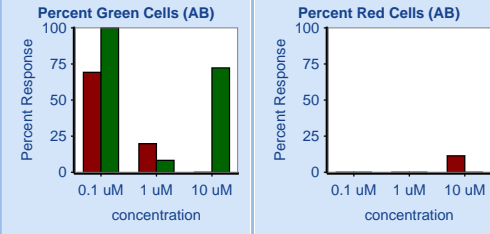 | <table border="1"> <thead> <tr> <th colspan="7">Average Response</th> </tr> <tr> <th>Dose</th> <th>Green Signal</th> <th>Actual Pct Green Cells</th> <th>Normalized Pct Green Cells</th> <th>Red Signal</th> <th>Actual Pct Red Cells</th> <th>Normalized Pct Red Cells</th> </tr> </thead> <tbody> <tr> <td>0.1 uM</td> <td>98.83</td> <td>0.89</td> <td>100.69</td> <td>77.14</td> <td>0.04</td> <td>-37.52</td> </tr> <tr> <td>1 uM</td> <td>88.52</td> <td>0.73</td> <td>14.00</td> <td>66.06</td> <td>0.02</td> <td>-48.26</td> </tr> <tr> <td>10 uM</td> <td>86.43</td> <td>0.79</td> <td>728.27</td> <td>92.32</td> <td>0.08</td> <td>-20.28</td> </tr> </tbody> </table> | Average Response |                        |                            |            |                      |                          |  | Dose | Green Signal | Actual Pct Green Cells | Normalized Pct Green Cells | Red Signal | Actual Pct Red Cells | Normalized Pct Red Cells | 0.1 uM | 98.83 | 0.89 | 100.69 | 77.14 | 0.04 | -37.52 | 1 uM | 88.52 | 0.73 | 14.00 | 66.06 | 0.02 | -48.26 | 10 uM | 86.43 | 0.79 | 728.27 | 92.32 | 0.08 | -20.28 |
|                        |                                                                                    | Average Response                                                                                                                                                                                                                                                                                                                                                                                                                                                                                                                                                                                                                                                                 |                  |                        |                            |            |                      |                          |  |      |              |                        |                            |            |                      |                          |        |       |      |        |       |      |        |      |       |      |       |       |      |        |       |       |      |        |       |      |        |
|                        |                                                                                    | Dose                                                                                                                                                                                                                                                                                                                                                                                                                                                                                                                                                                                                                                                                             | Green Signal     | Actual Pct Green Cells | Normalized Pct Green Cells | Red Signal | Actual Pct Red Cells | Normalized Pct Red Cells |  |      |              |                        |                            |            |                      |                          |        |       |      |        |       |      |        |      |       |      |       |       |      |        |       |       |      |        |       |      |        |
|                        |                                                                                    | 0.1 uM                                                                                                                                                                                                                                                                                                                                                                                                                                                                                                                                                                                                                                                                           | 98.83            | 0.89                   | 100.69                     | 77.14      | 0.04                 | -37.52                   |  |      |              |                        |                            |            |                      |                          |        |       |      |        |       |      |        |      |       |      |       |       |      |        |       |       |      |        |       |      |        |
| 1 uM                   | 88.52                                                                              | 0.73                                                                                                                                                                                                                                                                                                                                                                                                                                                                                                                                                                                                                                                                             | 14.00            | 66.06                  | 0.02                       | -48.26     |                      |                          |  |      |              |                        |                            |            |                      |                          |        |       |      |        |       |      |        |      |       |      |       |       |      |        |       |       |      |        |       |      |        |
| 10 uM                  | 86.43                                                                              | 0.79                                                                                                                                                                                                                                                                                                                                                                                                                                                                                                                                                                                                                                                                             | 728.27           | 92.32                  | 0.08                       | -20.28     |                      |                          |  |      |              |                        |                            |            |                      |                          |        |       |      |        |       |      |        |      |       |      |       |       |      |        |       |       |      |        |       |      |        |

| Compound                | Normalized Values (A and B Sets)                                                     | Responses                                                                                                                                                                                                                                                                                                                                                                                                                                                                                                                                                                                                                                                                       |                  |                        |                            |            |                      |                          |  |      |              |                        |                            |            |                      |                          |        |        |      |       |       |      |        |      |       |      |       |       |      |        |       |       |      |       |       |      |        |
|-------------------------|--------------------------------------------------------------------------------------|---------------------------------------------------------------------------------------------------------------------------------------------------------------------------------------------------------------------------------------------------------------------------------------------------------------------------------------------------------------------------------------------------------------------------------------------------------------------------------------------------------------------------------------------------------------------------------------------------------------------------------------------------------------------------------|------------------|------------------------|----------------------------|------------|----------------------|--------------------------|--|------|--------------|------------------------|----------------------------|------------|----------------------|--------------------------|--------|--------|------|-------|-------|------|--------|------|-------|------|-------|-------|------|--------|-------|-------|------|-------|-------|------|--------|
| <b>4-Phenylbutyrate</b> | 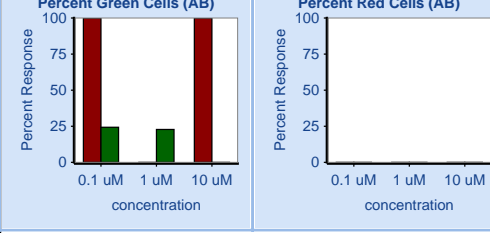 | <table border="1"> <thead> <tr> <th colspan="7">Average Response</th> </tr> <tr> <th>Dose</th> <th>Green Signal</th> <th>Actual Pct Green Cells</th> <th>Normalized Pct Green Cells</th> <th>Red Signal</th> <th>Actual Pct Red Cells</th> <th>Normalized Pct Red Cells</th> </tr> </thead> <tbody> <tr> <td>0.1 uM</td> <td>100.99</td> <td>0.88</td> <td>92.81</td> <td>82.11</td> <td>0.03</td> <td>-56.66</td> </tr> <tr> <td>1 uM</td> <td>95.14</td> <td>0.85</td> <td>10.67</td> <td>66.88</td> <td>0.02</td> <td>-39.64</td> </tr> <tr> <td>10 uM</td> <td>95.56</td> <td>0.87</td> <td>55.38</td> <td>72.55</td> <td>0.03</td> <td>-37.22</td> </tr> </tbody> </table> | Average Response |                        |                            |            |                      |                          |  | Dose | Green Signal | Actual Pct Green Cells | Normalized Pct Green Cells | Red Signal | Actual Pct Red Cells | Normalized Pct Red Cells | 0.1 uM | 100.99 | 0.88 | 92.81 | 82.11 | 0.03 | -56.66 | 1 uM | 95.14 | 0.85 | 10.67 | 66.88 | 0.02 | -39.64 | 10 uM | 95.56 | 0.87 | 55.38 | 72.55 | 0.03 | -37.22 |
|                         |                                                                                      | Average Response                                                                                                                                                                                                                                                                                                                                                                                                                                                                                                                                                                                                                                                                |                  |                        |                            |            |                      |                          |  |      |              |                        |                            |            |                      |                          |        |        |      |       |       |      |        |      |       |      |       |       |      |        |       |       |      |       |       |      |        |
|                         |                                                                                      | Dose                                                                                                                                                                                                                                                                                                                                                                                                                                                                                                                                                                                                                                                                            | Green Signal     | Actual Pct Green Cells | Normalized Pct Green Cells | Red Signal | Actual Pct Red Cells | Normalized Pct Red Cells |  |      |              |                        |                            |            |                      |                          |        |        |      |       |       |      |        |      |       |      |       |       |      |        |       |       |      |       |       |      |        |
|                         |                                                                                      | 0.1 uM                                                                                                                                                                                                                                                                                                                                                                                                                                                                                                                                                                                                                                                                          | 100.99           | 0.88                   | 92.81                      | 82.11      | 0.03                 | -56.66                   |  |      |              |                        |                            |            |                      |                          |        |        |      |       |       |      |        |      |       |      |       |       |      |        |       |       |      |       |       |      |        |
| 1 uM                    | 95.14                                                                                | 0.85                                                                                                                                                                                                                                                                                                                                                                                                                                                                                                                                                                                                                                                                            | 10.67            | 66.88                  | 0.02                       | -39.64     |                      |                          |  |      |              |                        |                            |            |                      |                          |        |        |      |       |       |      |        |      |       |      |       |       |      |        |       |       |      |       |       |      |        |
| 10 uM                   | 95.56                                                                                | 0.87                                                                                                                                                                                                                                                                                                                                                                                                                                                                                                                                                                                                                                                                            | 55.38            | 72.55                  | 0.03                       | -37.22     |                      |                          |  |      |              |                        |                            |            |                      |                          |        |        |      |       |       |      |        |      |       |      |       |       |      |        |       |       |      |       |       |      |        |

| Compound                                                     | Normalized Values (A and B Sets)                                                     | Responses                                                                                                                                                                                                                                                                                                                                                                                                                                                                                                                                                                                                                                                                        |                  |                        |                            |            |                      |                          |  |      |              |                        |                            |            |                      |                          |        |        |      |        |       |      |       |      |       |      |       |       |      |        |       |        |      |        |       |      |       |
|--------------------------------------------------------------|--------------------------------------------------------------------------------------|----------------------------------------------------------------------------------------------------------------------------------------------------------------------------------------------------------------------------------------------------------------------------------------------------------------------------------------------------------------------------------------------------------------------------------------------------------------------------------------------------------------------------------------------------------------------------------------------------------------------------------------------------------------------------------|------------------|------------------------|----------------------------|------------|----------------------|--------------------------|--|------|--------------|------------------------|----------------------------|------------|----------------------|--------------------------|--------|--------|------|--------|-------|------|-------|------|-------|------|-------|-------|------|--------|-------|--------|------|--------|-------|------|-------|
| <b>5-hydroxymethyl Tolterodine (PNU 200577, 5-HMT, 5-HM)</b> | 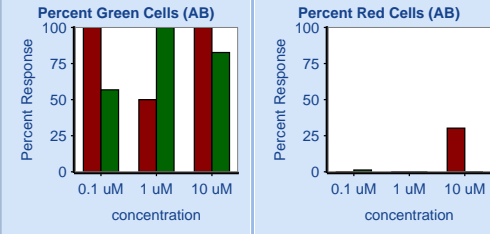 | <table border="1"> <thead> <tr> <th colspan="7">Average Response</th> </tr> <tr> <th>Dose</th> <th>Green Signal</th> <th>Actual Pct Green Cells</th> <th>Normalized Pct Green Cells</th> <th>Red Signal</th> <th>Actual Pct Red Cells</th> <th>Normalized Pct Red Cells</th> </tr> </thead> <tbody> <tr> <td>0.1 uM</td> <td>102.98</td> <td>0.91</td> <td>107.32</td> <td>96.74</td> <td>0.10</td> <td>-8.78</td> </tr> <tr> <td>1 uM</td> <td>97.93</td> <td>0.84</td> <td>75.07</td> <td>82.78</td> <td>0.03</td> <td>-40.31</td> </tr> <tr> <td>10 uM</td> <td>103.51</td> <td>0.93</td> <td>375.93</td> <td>96.88</td> <td>0.10</td> <td>-9.94</td> </tr> </tbody> </table> | Average Response |                        |                            |            |                      |                          |  | Dose | Green Signal | Actual Pct Green Cells | Normalized Pct Green Cells | Red Signal | Actual Pct Red Cells | Normalized Pct Red Cells | 0.1 uM | 102.98 | 0.91 | 107.32 | 96.74 | 0.10 | -8.78 | 1 uM | 97.93 | 0.84 | 75.07 | 82.78 | 0.03 | -40.31 | 10 uM | 103.51 | 0.93 | 375.93 | 96.88 | 0.10 | -9.94 |
|                                                              |                                                                                      | Average Response                                                                                                                                                                                                                                                                                                                                                                                                                                                                                                                                                                                                                                                                 |                  |                        |                            |            |                      |                          |  |      |              |                        |                            |            |                      |                          |        |        |      |        |       |      |       |      |       |      |       |       |      |        |       |        |      |        |       |      |       |
|                                                              |                                                                                      | Dose                                                                                                                                                                                                                                                                                                                                                                                                                                                                                                                                                                                                                                                                             | Green Signal     | Actual Pct Green Cells | Normalized Pct Green Cells | Red Signal | Actual Pct Red Cells | Normalized Pct Red Cells |  |      |              |                        |                            |            |                      |                          |        |        |      |        |       |      |       |      |       |      |       |       |      |        |       |        |      |        |       |      |       |
|                                                              |                                                                                      | 0.1 uM                                                                                                                                                                                                                                                                                                                                                                                                                                                                                                                                                                                                                                                                           | 102.98           | 0.91                   | 107.32                     | 96.74      | 0.10                 | -8.78                    |  |      |              |                        |                            |            |                      |                          |        |        |      |        |       |      |       |      |       |      |       |       |      |        |       |        |      |        |       |      |       |
| 1 uM                                                         | 97.93                                                                                | 0.84                                                                                                                                                                                                                                                                                                                                                                                                                                                                                                                                                                                                                                                                             | 75.07            | 82.78                  | 0.03                       | -40.31     |                      |                          |  |      |              |                        |                            |            |                      |                          |        |        |      |        |       |      |       |      |       |      |       |       |      |        |       |        |      |        |       |      |       |
| 10 uM                                                        | 103.51                                                                               | 0.93                                                                                                                                                                                                                                                                                                                                                                                                                                                                                                                                                                                                                                                                             | 375.93           | 96.88                  | 0.10                       | -9.94      |                      |                          |  |      |              |                        |                            |            |                      |                          |        |        |      |        |       |      |       |      |       |      |       |       |      |        |       |        |      |        |       |      |       |

| Compound                           | Normalized Values (A and B Sets)                                                     | Responses                                                                                                                                                                                                                                                                                                                                                                                                                                                                                                                                                                                                                                                                 |                  |                        |                            |            |                      |                          |  |      |              |                        |                            |            |                      |                          |        |       |      |        |       |      |        |      |       |      |      |       |      |        |       |       |      |  |       |      |        |
|------------------------------------|--------------------------------------------------------------------------------------|---------------------------------------------------------------------------------------------------------------------------------------------------------------------------------------------------------------------------------------------------------------------------------------------------------------------------------------------------------------------------------------------------------------------------------------------------------------------------------------------------------------------------------------------------------------------------------------------------------------------------------------------------------------------------|------------------|------------------------|----------------------------|------------|----------------------|--------------------------|--|------|--------------|------------------------|----------------------------|------------|----------------------|--------------------------|--------|-------|------|--------|-------|------|--------|------|-------|------|------|-------|------|--------|-------|-------|------|--|-------|------|--------|
| <b>5-hydroxytryptophan (5-HTP)</b> | 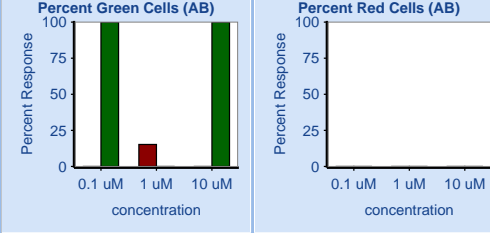 | <table border="1"> <thead> <tr> <th colspan="7">Average Response</th> </tr> <tr> <th>Dose</th> <th>Green Signal</th> <th>Actual Pct Green Cells</th> <th>Normalized Pct Green Cells</th> <th>Red Signal</th> <th>Actual Pct Red Cells</th> <th>Normalized Pct Red Cells</th> </tr> </thead> <tbody> <tr> <td>0.1 uM</td> <td>84.25</td> <td>0.76</td> <td>-23.35</td> <td>88.90</td> <td>0.06</td> <td>-24.83</td> </tr> <tr> <td>1 uM</td> <td>83.10</td> <td>0.71</td> <td>3.71</td> <td>81.15</td> <td>0.03</td> <td>-41.97</td> </tr> <tr> <td>10 uM</td> <td>92.16</td> <td>0.88</td> <td></td> <td>82.92</td> <td>0.03</td> <td>-42.08</td> </tr> </tbody> </table> | Average Response |                        |                            |            |                      |                          |  | Dose | Green Signal | Actual Pct Green Cells | Normalized Pct Green Cells | Red Signal | Actual Pct Red Cells | Normalized Pct Red Cells | 0.1 uM | 84.25 | 0.76 | -23.35 | 88.90 | 0.06 | -24.83 | 1 uM | 83.10 | 0.71 | 3.71 | 81.15 | 0.03 | -41.97 | 10 uM | 92.16 | 0.88 |  | 82.92 | 0.03 | -42.08 |
|                                    |                                                                                      | Average Response                                                                                                                                                                                                                                                                                                                                                                                                                                                                                                                                                                                                                                                          |                  |                        |                            |            |                      |                          |  |      |              |                        |                            |            |                      |                          |        |       |      |        |       |      |        |      |       |      |      |       |      |        |       |       |      |  |       |      |        |
|                                    |                                                                                      | Dose                                                                                                                                                                                                                                                                                                                                                                                                                                                                                                                                                                                                                                                                      | Green Signal     | Actual Pct Green Cells | Normalized Pct Green Cells | Red Signal | Actual Pct Red Cells | Normalized Pct Red Cells |  |      |              |                        |                            |            |                      |                          |        |       |      |        |       |      |        |      |       |      |      |       |      |        |       |       |      |  |       |      |        |
|                                    |                                                                                      | 0.1 uM                                                                                                                                                                                                                                                                                                                                                                                                                                                                                                                                                                                                                                                                    | 84.25            | 0.76                   | -23.35                     | 88.90      | 0.06                 | -24.83                   |  |      |              |                        |                            |            |                      |                          |        |       |      |        |       |      |        |      |       |      |      |       |      |        |       |       |      |  |       |      |        |
| 1 uM                               | 83.10                                                                                | 0.71                                                                                                                                                                                                                                                                                                                                                                                                                                                                                                                                                                                                                                                                      | 3.71             | 81.15                  | 0.03                       | -41.97     |                      |                          |  |      |              |                        |                            |            |                      |                          |        |       |      |        |       |      |        |      |       |      |      |       |      |        |       |       |      |  |       |      |        |
| 10 uM                              | 92.16                                                                                | 0.88                                                                                                                                                                                                                                                                                                                                                                                                                                                                                                                                                                                                                                                                      |                  | 82.92                  | 0.03                       | -42.08     |                      |                          |  |      |              |                        |                            |            |                      |                          |        |       |      |        |       |      |        |      |       |      |      |       |      |        |       |       |      |  |       |      |        |

| Compound | Normalized Values (A and B Sets) | Responses |  |         |  |  |
|----------|----------------------------------|-----------|--|---------|--|--|
|          |                                  |           |  | -169.23 |  |  |

| Compound                        | Normalized Values (A and B Sets) | Responses               |              |                        |                            |            |                      |                          |
|---------------------------------|----------------------------------|-------------------------|--------------|------------------------|----------------------------|------------|----------------------|--------------------------|
| <b>10-Deacetylbaaccatin-III</b> |                                  | <b>Average Response</b> |              |                        |                            |            |                      |                          |
|                                 |                                  | Dose                    | Green Signal | Actual Pct Green Cells | Normalized Pct Green Cells | Red Signal | Actual Pct Red Cells | Normalized Pct Red Cells |
|                                 |                                  | 0.1 uM                  | 96.25        | 0.86                   | 64.63                      | 92.14      | 0.08                 | -20.34                   |
|                                 |                                  | 1 uM                    | 103.73       | 0.86                   | 82.31                      | 84.14      | 0.05                 | -35.75                   |
| 10 uM                           | 88.81                            | 0.84                    | 248.65       | 91.59                  | 0.02                       | -47.13     |                      |                          |

| Compound                     | Normalized Values (A and B Sets) | Responses               |              |                        |                            |            |                      |                          |
|------------------------------|----------------------------------|-------------------------|--------------|------------------------|----------------------------|------------|----------------------|--------------------------|
| <b>17-AAG (Tanespimycin)</b> |                                  | <b>Average Response</b> |              |                        |                            |            |                      |                          |
|                              |                                  | Dose                    | Green Signal | Actual Pct Green Cells | Normalized Pct Green Cells | Red Signal | Actual Pct Red Cells | Normalized Pct Red Cells |
|                              |                                  | 0.1 uM                  | 89.10        | 0.80                   | -0.41                      | 84.63      | 0.05                 | -49.57                   |
|                              |                                  | 1 uM                    | 91.91        | 0.73                   | -50.55                     | 109.19     | 0.14                 | 5.40                     |
| 10 uM                        | 70.59                            | 0.51                    | 152.95       | 102.62                 | 0.09                       | -13.00     |                      |                          |

| Compound                          | Normalized Values (A and B Sets) | Responses               |              |                        |                            |            |                      |                          |
|-----------------------------------|----------------------------------|-------------------------|--------------|------------------------|----------------------------|------------|----------------------|--------------------------|
| <b>17-DMAG (Alvespimycin) HCl</b> |                                  | <b>Average Response</b> |              |                        |                            |            |                      |                          |
|                                   |                                  | Dose                    | Green Signal | Actual Pct Green Cells | Normalized Pct Green Cells | Red Signal | Actual Pct Red Cells | Normalized Pct Red Cells |
|                                   |                                  | 0.1 uM                  | 106.60       | 0.85                   | 64.71                      | 99.10      | 0.11                 | -20.45                   |
|                                   |                                  | 1 uM                    | 96.48        | 0.75                   | -17.31                     | 112.03     | 0.15                 | 10.77                    |
| 10 uM                             | 96.37                            | 0.82                    | 68.41        | 77.23                  | 0.03                       | -39.00     |                      |                          |

| Compound                  | Normalized Values (A and B Sets) | Responses               |              |                        |                            |            |                      |                          |
|---------------------------|----------------------------------|-------------------------|--------------|------------------------|----------------------------|------------|----------------------|--------------------------|
| <b>20-Hydroxyecdysone</b> |                                  | <b>Average Response</b> |              |                        |                            |            |                      |                          |
|                           |                                  | Dose                    | Green Signal | Actual Pct Green Cells | Normalized Pct Green Cells | Red Signal | Actual Pct Red Cells | Normalized Pct Red Cells |
|                           |                                  | 0.1 uM                  | 107.67       | 0.93                   | 136.54                     | 90.20      | 0.07                 | -20.60                   |
|                           |                                  | 1 uM                    | 88.60        | 0.76                   | 30.86                      | 83.71      | 0.03                 | -40.64                   |
| 10 uM                     | 105.27                           | 0.94                    | 238.11       | 102.36                 | 0.08                       | -21.42     |                      |                          |

| Compound        | Normalized Values (A and B Sets) | Responses               |              |  |  |            |
|-----------------|----------------------------------|-------------------------|--------------|--|--|------------|
| <b>A-205804</b> |                                  | <b>Average Response</b> |              |  |  |            |
|                 |                                  | Dose                    | Green Signal |  |  | Red Signal |

Compound

Normalized Values (A and B Sets)

Responses

| Compound | 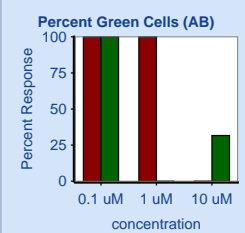  |      | Average Response |              |                        |                            |            |                      |                          |
|----------|----------------------------------------------------------------------------------------------------------------------------------------------------------------------|------|------------------|--------------|------------------------|----------------------------|------------|----------------------|--------------------------|
|          |                                                                                                                                                                      |      | Dose             | Green Signal | Actual Pct Green Cells | Normalized Pct Green Cells | Red Signal | Actual Pct Red Cells | Normalized Pct Red Cells |
|          |                                                                                                                                                                      |      | 0.1 uM           | 94.69        | 0.91                   | 130.36                     | 70.60      | 0.03                 | -50.84                   |
|          |                                                                                                                                                                      |      | 1 uM             | 95.45        | 0.81                   | 59.69                      | 68.28      | 0.02                 | -56.22                   |
| 10 uM    | 83.93                                                                                                                                                                | 0.73 | -45.71           | 70.41        | 0.02                   | -54.38                     |            |                      |                          |

Compound

Normalized Values (A and B Sets)

Responses

| Compound | 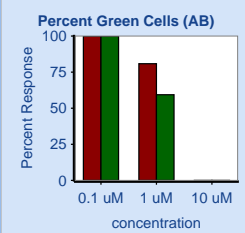  |      | Average Response |              |                        |                            |            |                      |                          |
|----------|----------------------------------------------------------------------------------------------------------------------------------------------------------------------|------|------------------|--------------|------------------------|----------------------------|------------|----------------------|--------------------------|
|          |                                                                                                                                                                      |      | Dose             | Green Signal | Actual Pct Green Cells | Normalized Pct Green Cells | Red Signal | Actual Pct Red Cells | Normalized Pct Red Cells |
|          |                                                                                                                                                                      |      | 0.1 uM           | 106.62       | 0.91                   | 119.00                     | 87.60      | 0.10                 | -4.60                    |
|          |                                                                                                                                                                      |      | 1 uM             | 106.08       | 0.84                   | 70.10                      | 99.30      | 0.12                 | -1.84                    |
| 10 uM    | 76.84                                                                                                                                                                | 0.52 | 2501.47          | 82.96        | 0.10                   | -12.94                     |            |                      |                          |

Compound

Normalized Values (A and B Sets)

Responses

| Compound | 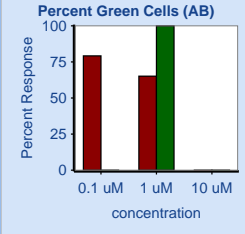  |      | Average Response |              |                        |                            |            |                      |                          |
|----------|------------------------------------------------------------------------------------------------------------------------------------------------------------------------|------|------------------|--------------|------------------------|----------------------------|------------|----------------------|--------------------------|
|          |                                                                                                                                                                        |      | Dose             | Green Signal | Actual Pct Green Cells | Normalized Pct Green Cells | Red Signal | Actual Pct Red Cells | Normalized Pct Red Cells |
|          |                                                                                                                                                                        |      | 0.1 uM           | 88.04        | 0.79                   | -10.30                     | 92.68      | 0.10                 | -9.44                    |
|          |                                                                                                                                                                        |      | 1 uM             | 104.82       | 0.88                   | 97.08                      | 84.56      | 0.05                 | -33.49                   |
| 10 uM    | 84.90                                                                                                                                                                  | 0.82 | -85.38           | 94.46        | 0.07                   | -25.58                     |            |                      |                          |

Compound

Normalized Values (A and B Sets)

Responses

| Compound | 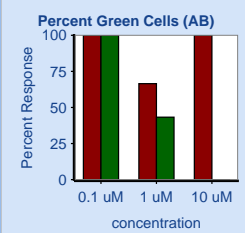  |      | Average Response |              |                        |                            |            |                      |                          |
|----------|--------------------------------------------------------------------------------------------------------------------------------------------------------------------------|------|------------------|--------------|------------------------|----------------------------|------------|----------------------|--------------------------|
|          |                                                                                                                                                                          |      | Dose             | Green Signal | Actual Pct Green Cells | Normalized Pct Green Cells | Red Signal | Actual Pct Red Cells | Normalized Pct Red Cells |
|          |                                                                                                                                                                          |      | 0.1 uM           | 98.61        | 0.91                   | 113.93                     | 84.15      | 0.06                 | -27.23                   |
|          |                                                                                                                                                                          |      | 1 uM             | 93.97        | 0.81                   | 54.89                      | 107.49     | 0.14                 | 4.60                     |
| 10 uM    | 93.82                                                                                                                                                                    | 0.83 | 28.17            | 96.12        | 0.07                   | -24.35                     |            |                      |                          |

Compound

Normalized Values (A and B Sets)

Responses

| Compound | 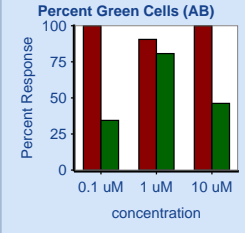  |      | Average Response |              |                        |                            |            |                      |                          |
|----------|--------------------------------------------------------------------------------------------------------------------------------------------------------------------------|------|------------------|--------------|------------------------|----------------------------|------------|----------------------|--------------------------|
|          |                                                                                                                                                                          |      | Dose             | Green Signal | Actual Pct Green Cells | Normalized Pct Green Cells | Red Signal | Actual Pct Red Cells | Normalized Pct Red Cells |
|          |                                                                                                                                                                          |      | 0.1 uM           | 103.14       | 0.90                   | 99.54                      | 90.75      | 0.11                 | -8.14                    |
|          |                                                                                                                                                                          |      | 1 uM             | 100.54       | 0.87                   | 85.63                      | 102.36     | 0.13                 | 1.75                     |
| 10 uM    | 98.47                                                                                                                                                                    | 0.90 | 228.90           | 104.75       | 0.11                   | -4.08                      |            |                      |                          |

Compound

Normalized Values (A and B Sets)

Responses

| A922500 | Percent Green Cells (AB)   |  | Percent Red Cells (AB)     |       | Average Response |              |                        |                            |            |                      |                          |
|---------|----------------------------|--|----------------------------|-------|------------------|--------------|------------------------|----------------------------|------------|----------------------|--------------------------|
|         | 100<br>75<br>50<br>25<br>0 |  | 100<br>75<br>50<br>25<br>0 |       | Dose             | Green Signal | Actual Pct Green Cells | Normalized Pct Green Cells | Red Signal | Actual Pct Red Cells | Normalized Pct Red Cells |
|         | 0.1 uM 1 uM 10 uM          |  | 0.1 uM 1 uM 10 uM          |       | 0.1 uM           | 113.68       | 0.96                   | 166.06                     | 92.37      | 0.09                 | -12.83                   |
|         | concentration              |  | concentration              |       | 1 uM             | 110.04       | 0.92                   | 114.39                     | 77.73      | 0.04                 | -38.53                   |
|         |                            |  |                            | 10 uM | 108.15           | 0.94         | 326.92                 | 84.35                      | 0.04       | -41.20               |                          |

Compound

Normalized Values (A and B Sets)

Responses

| Abiraterone Acetate | Percent Green Cells (AB)   |  | Percent Red Cells (AB)     |       | Average Response |              |                        |                            |            |                      |                          |
|---------------------|----------------------------|--|----------------------------|-------|------------------|--------------|------------------------|----------------------------|------------|----------------------|--------------------------|
|                     | 100<br>75<br>50<br>25<br>0 |  | 100<br>75<br>50<br>25<br>0 |       | Dose             | Green Signal | Actual Pct Green Cells | Normalized Pct Green Cells | Red Signal | Actual Pct Red Cells | Normalized Pct Red Cells |
|                     | 0.1 uM 1 uM 10 uM          |  | 0.1 uM 1 uM 10 uM          |       | 0.1 uM           | 92.72        | 0.84                   | 40.09                      | 77.88      | 0.03                 | -42.90                   |
|                     | concentration              |  | concentration              |       | 1 uM             | 100.31       | 0.83                   | 68.07                      | 99.51      | 0.10                 | -13.53                   |
|                     |                            |  |                            | 10 uM | 104.34           | 0.93         | 302.50                 | 99.70                      | 0.08       | -18.46               |                          |

Compound

Normalized Values (A and B Sets)

Responses

| ABT-199 (GDC-0199) | Percent Green Cells (AB)   |  | Percent Red Cells (AB)     |                                                                                                 | Average Response |              |                        |                            |            |                      |                          |
|--------------------|----------------------------|--|----------------------------|-------------------------------------------------------------------------------------------------|------------------|--------------|------------------------|----------------------------|------------|----------------------|--------------------------|
|                    | 100<br>75<br>50<br>25<br>0 |  | 100<br>75<br>50<br>25<br>0 |                                                                                                 | Dose             | Green Signal | Actual Pct Green Cells | Normalized Pct Green Cells | Red Signal | Actual Pct Red Cells | Normalized Pct Red Cells |
|                    | 0.1 uM 1 uM 10 uM          |  | 0.1 uM 1 uM 10 uM          |                                                                                                 | 0.1 uM           | 96.37        | 0.85                   | 56.49                      | 92.52      | 0.05                 | -42.17                   |
|                    | concentration              |  | concentration              |                                                                                                 | 1 uM             | 91.34        | 0.83                   | 271.66                     | 111.84     | 0.19                 | 54.40                    |
|                    |                            |  |                            | 10 uM <td>78.34</td> <td>0.64</td> <td>173.76</td> <td>80.97</td> <td>0.05</td> <td>-28.82</td> | 78.34            | 0.64         | 173.76                 | 80.97                      | 0.05       | -28.82               |                          |

Compound

Normalized Values (A and B Sets)

Responses

| ABT-751 (E7010) | Percent Green Cells (AB)   |  | Percent Red Cells (AB)     |                                                                                                 | Average Response |              |                        |                            |            |                      |                          |
|-----------------|----------------------------|--|----------------------------|-------------------------------------------------------------------------------------------------|------------------|--------------|------------------------|----------------------------|------------|----------------------|--------------------------|
|                 | 100<br>75<br>50<br>25<br>0 |  | 100<br>75<br>50<br>25<br>0 |                                                                                                 | Dose             | Green Signal | Actual Pct Green Cells | Normalized Pct Green Cells | Red Signal | Actual Pct Red Cells | Normalized Pct Red Cells |
|                 | 0.1 uM 1 uM 10 uM          |  | 0.1 uM 1 uM 10 uM          |                                                                                                 | 0.1 uM           | 97.60        | 0.86                   | 66.97                      | 82.10      | 0.03                 | -55.93                   |
|                 | concentration              |  | concentration              |                                                                                                 | 1 uM             | 103.79       | 0.79                   | 12.99                      | 104.53     | 0.10                 | -9.93                    |
|                 |                            |  |                            | 10 uM <td>107.19</td> <td>0.76</td> <td>26.91</td> <td>108.71</td> <td>0.15</td> <td>13.59</td> | 107.19           | 0.76         | 26.91                  | 108.71                     | 0.15       | 13.59                |                          |

Compound

Normalized Values (A and B Sets)

Responses

| Acadesine | Percent Green Cells (AB)   |  | Percent Red Cells (AB)     |      | Average Response |              |                        |                            |            |                      |                          |
|-----------|----------------------------|--|----------------------------|------|------------------|--------------|------------------------|----------------------------|------------|----------------------|--------------------------|
|           | 100<br>75<br>50<br>25<br>0 |  | 100<br>75<br>50<br>25<br>0 |      | Dose             | Green Signal | Actual Pct Green Cells | Normalized Pct Green Cells | Red Signal | Actual Pct Red Cells | Normalized Pct Red Cells |
|           | 0.1 uM 1 uM 10 uM          |  | 0.1 uM 1 uM 10 uM          |      | 0.1 uM           | 74.80        | 0.63                   | 192.83                     | 109.49     | 0.14                 | 7.64                     |
|           |                            |  |                            | 1 uM | 73.99            | 0.59         |                        | 92.84                      | 0.06       | -29.15               |                          |





Compound

Normalized Values (A and B Sets)

Responses

|       |        |        |                        |                            | <table border="1"> <thead> <tr> <th></th> <th></th> <th>Actual Pct Green Cells</th> <th>Normalized Pct Green Cells</th> <th></th> <th></th> <th>Normalized Pct Red Cells</th> </tr> </thead> <tbody> <tr> <td>0.1 uM</td> <td>103.84</td> <td>0.91</td> <td>103.08</td> <td>82.97</td> <td>0.04</td> <td>-52.66</td> </tr> <tr> <td>1 uM</td> <td>125.58</td> <td>0.97</td> <td>181.74</td> <td>100.66</td> <td>0.09</td> <td>-17.67</td> </tr> <tr> <td>10 uM</td> <td>102.73</td> <td>0.86</td> <td>91.34</td> <td>105.59</td> <td>0.07</td> <td>-23.60</td> </tr> </tbody> </table> |        |                          |  |  |  |  |  |  | Actual Pct Green Cells | Normalized Pct Green Cells |  |  | Normalized Pct Red Cells | 0.1 uM | 103.84 | 0.91 | 103.08 | 82.97 | 0.04 | -52.66 | 1 uM | 125.58 | 0.97 | 181.74 | 100.66 | 0.09 | -17.67 | 10 uM | 102.73 | 0.86 | 91.34 | 105.59 | 0.07 | -23.60 |
|-------|--------|--------|------------------------|----------------------------|----------------------------------------------------------------------------------------------------------------------------------------------------------------------------------------------------------------------------------------------------------------------------------------------------------------------------------------------------------------------------------------------------------------------------------------------------------------------------------------------------------------------------------------------------------------------------------------|--------|--------------------------|--|--|--|--|--|--|------------------------|----------------------------|--|--|--------------------------|--------|--------|------|--------|-------|------|--------|------|--------|------|--------|--------|------|--------|-------|--------|------|-------|--------|------|--------|
|       |        |        | Actual Pct Green Cells | Normalized Pct Green Cells |                                                                                                                                                                                                                                                                                                                                                                                                                                                                                                                                                                                        |        | Normalized Pct Red Cells |  |  |  |  |  |  |                        |                            |  |  |                          |        |        |      |        |       |      |        |      |        |      |        |        |      |        |       |        |      |       |        |      |        |
|       | 0.1 uM | 103.84 | 0.91                   | 103.08                     | 82.97                                                                                                                                                                                                                                                                                                                                                                                                                                                                                                                                                                                  | 0.04   | -52.66                   |  |  |  |  |  |  |                        |                            |  |  |                          |        |        |      |        |       |      |        |      |        |      |        |        |      |        |       |        |      |       |        |      |        |
|       | 1 uM   | 125.58 | 0.97                   | 181.74                     | 100.66                                                                                                                                                                                                                                                                                                                                                                                                                                                                                                                                                                                 | 0.09   | -17.67                   |  |  |  |  |  |  |                        |                            |  |  |                          |        |        |      |        |       |      |        |      |        |      |        |        |      |        |       |        |      |       |        |      |        |
| 10 uM | 102.73 | 0.86   | 91.34                  | 105.59                     | 0.07                                                                                                                                                                                                                                                                                                                                                                                                                                                                                                                                                                                   | -23.60 |                          |  |  |  |  |  |  |                        |                            |  |  |                          |        |        |      |        |       |      |        |      |        |      |        |        |      |        |       |        |      |       |        |      |        |

Compound

Normalized Values (A and B Sets)

Responses

| <b>ADL5859 HCl</b> |                  |              |                        |                            | <table border="1"> <thead> <tr> <th colspan="7">Average Response</th> </tr> <tr> <th>Dose</th> <th>Green Signal</th> <th>Actual Pct Green Cells</th> <th>Normalized Pct Green Cells</th> <th>Red Signal</th> <th>Actual Pct Red Cells</th> <th>Normalized Pct Red Cells</th> </tr> </thead> <tbody> <tr> <td>0.1 uM</td> <td>96.14</td> <td>0.88</td> <td>100.30</td> <td>68.39</td> <td>0.02</td> <td>-60.22</td> </tr> <tr> <td>1 uM</td> <td>88.93</td> <td>0.80</td> <td>16.39</td> <td>84.53</td> <td>0.03</td> <td>-44.60</td> </tr> <tr> <td>10 uM</td> <td>89.49</td> <td>0.83</td> <td>60.17</td> <td>96.59</td> <td>0.03</td> <td>-39.03</td> </tr> </tbody> </table> |                      |                          |  |  |  |  | Average Response |  |  |  |  |  |  | Dose | Green Signal | Actual Pct Green Cells | Normalized Pct Green Cells | Red Signal | Actual Pct Red Cells | Normalized Pct Red Cells | 0.1 uM | 96.14 | 0.88 | 100.30 | 68.39 | 0.02 | -60.22 | 1 uM | 88.93 | 0.80 | 16.39 | 84.53 | 0.03 | -44.60 | 10 uM | 89.49 | 0.83 | 60.17 | 96.59 | 0.03 | -39.03 |
|--------------------|------------------|--------------|------------------------|----------------------------|---------------------------------------------------------------------------------------------------------------------------------------------------------------------------------------------------------------------------------------------------------------------------------------------------------------------------------------------------------------------------------------------------------------------------------------------------------------------------------------------------------------------------------------------------------------------------------------------------------------------------------------------------------------------------------|----------------------|--------------------------|--|--|--|--|------------------|--|--|--|--|--|--|------|--------------|------------------------|----------------------------|------------|----------------------|--------------------------|--------|-------|------|--------|-------|------|--------|------|-------|------|-------|-------|------|--------|-------|-------|------|-------|-------|------|--------|
|                    | Average Response |              |                        |                            |                                                                                                                                                                                                                                                                                                                                                                                                                                                                                                                                                                                                                                                                                 |                      |                          |  |  |  |  |                  |  |  |  |  |  |  |      |              |                        |                            |            |                      |                          |        |       |      |        |       |      |        |      |       |      |       |       |      |        |       |       |      |       |       |      |        |
|                    | Dose             | Green Signal | Actual Pct Green Cells | Normalized Pct Green Cells | Red Signal                                                                                                                                                                                                                                                                                                                                                                                                                                                                                                                                                                                                                                                                      | Actual Pct Red Cells | Normalized Pct Red Cells |  |  |  |  |                  |  |  |  |  |  |  |      |              |                        |                            |            |                      |                          |        |       |      |        |       |      |        |      |       |      |       |       |      |        |       |       |      |       |       |      |        |
|                    | 0.1 uM           | 96.14        | 0.88                   | 100.30                     | 68.39                                                                                                                                                                                                                                                                                                                                                                                                                                                                                                                                                                                                                                                                           | 0.02                 | -60.22                   |  |  |  |  |                  |  |  |  |  |  |  |      |              |                        |                            |            |                      |                          |        |       |      |        |       |      |        |      |       |      |       |       |      |        |       |       |      |       |       |      |        |
| 1 uM               | 88.93            | 0.80         | 16.39                  | 84.53                      | 0.03                                                                                                                                                                                                                                                                                                                                                                                                                                                                                                                                                                                                                                                                            | -44.60               |                          |  |  |  |  |                  |  |  |  |  |  |  |      |              |                        |                            |            |                      |                          |        |       |      |        |       |      |        |      |       |      |       |       |      |        |       |       |      |       |       |      |        |
| 10 uM              | 89.49            | 0.83         | 60.17                  | 96.59                      | 0.03                                                                                                                                                                                                                                                                                                                                                                                                                                                                                                                                                                                                                                                                            | -39.03               |                          |  |  |  |  |                  |  |  |  |  |  |  |      |              |                        |                            |            |                      |                          |        |       |      |        |       |      |        |      |       |      |       |       |      |        |       |       |      |       |       |      |        |

Compound

Normalized Values (A and B Sets)

Responses

| <b>Adrenalone HCl</b> |                  |              |                        |                            | <table border="1"> <thead> <tr> <th colspan="7">Average Response</th> </tr> <tr> <th>Dose</th> <th>Green Signal</th> <th>Actual Pct Green Cells</th> <th>Normalized Pct Green Cells</th> <th>Red Signal</th> <th>Actual Pct Red Cells</th> <th>Normalized Pct Red Cells</th> </tr> </thead> <tbody> <tr> <td>0.1 uM</td> <td>81.80</td> <td>0.80</td> <td>199.25</td> <td>98.95</td> <td>0.11</td> <td>-7.31</td> </tr> <tr> <td>1 uM</td> <td>93.27</td> <td>0.79</td> <td>51.29</td> <td>99.73</td> <td>0.08</td> <td>-26.66</td> </tr> <tr> <td>10 uM</td> <td>92.50</td> <td>0.85</td> <td>42.41</td> <td>79.55</td> <td>0.06</td> <td>-34.07</td> </tr> </tbody> </table> |                      |                          |  |  |  |  | Average Response |  |  |  |  |  |  | Dose | Green Signal | Actual Pct Green Cells | Normalized Pct Green Cells | Red Signal | Actual Pct Red Cells | Normalized Pct Red Cells | 0.1 uM | 81.80 | 0.80 | 199.25 | 98.95 | 0.11 | -7.31 | 1 uM | 93.27 | 0.79 | 51.29 | 99.73 | 0.08 | -26.66 | 10 uM | 92.50 | 0.85 | 42.41 | 79.55 | 0.06 | -34.07 |
|-----------------------|------------------|--------------|------------------------|----------------------------|--------------------------------------------------------------------------------------------------------------------------------------------------------------------------------------------------------------------------------------------------------------------------------------------------------------------------------------------------------------------------------------------------------------------------------------------------------------------------------------------------------------------------------------------------------------------------------------------------------------------------------------------------------------------------------|----------------------|--------------------------|--|--|--|--|------------------|--|--|--|--|--|--|------|--------------|------------------------|----------------------------|------------|----------------------|--------------------------|--------|-------|------|--------|-------|------|-------|------|-------|------|-------|-------|------|--------|-------|-------|------|-------|-------|------|--------|
|                       | Average Response |              |                        |                            |                                                                                                                                                                                                                                                                                                                                                                                                                                                                                                                                                                                                                                                                                |                      |                          |  |  |  |  |                  |  |  |  |  |  |  |      |              |                        |                            |            |                      |                          |        |       |      |        |       |      |       |      |       |      |       |       |      |        |       |       |      |       |       |      |        |
|                       | Dose             | Green Signal | Actual Pct Green Cells | Normalized Pct Green Cells | Red Signal                                                                                                                                                                                                                                                                                                                                                                                                                                                                                                                                                                                                                                                                     | Actual Pct Red Cells | Normalized Pct Red Cells |  |  |  |  |                  |  |  |  |  |  |  |      |              |                        |                            |            |                      |                          |        |       |      |        |       |      |       |      |       |      |       |       |      |        |       |       |      |       |       |      |        |
|                       | 0.1 uM           | 81.80        | 0.80                   | 199.25                     | 98.95                                                                                                                                                                                                                                                                                                                                                                                                                                                                                                                                                                                                                                                                          | 0.11                 | -7.31                    |  |  |  |  |                  |  |  |  |  |  |  |      |              |                        |                            |            |                      |                          |        |       |      |        |       |      |       |      |       |      |       |       |      |        |       |       |      |       |       |      |        |
| 1 uM                  | 93.27            | 0.79         | 51.29                  | 99.73                      | 0.08                                                                                                                                                                                                                                                                                                                                                                                                                                                                                                                                                                                                                                                                           | -26.66               |                          |  |  |  |  |                  |  |  |  |  |  |  |      |              |                        |                            |            |                      |                          |        |       |      |        |       |      |       |      |       |      |       |       |      |        |       |       |      |       |       |      |        |
| 10 uM                 | 92.50            | 0.85         | 42.41                  | 79.55                      | 0.06                                                                                                                                                                                                                                                                                                                                                                                                                                                                                                                                                                                                                                                                           | -34.07               |                          |  |  |  |  |                  |  |  |  |  |  |  |      |              |                        |                            |            |                      |                          |        |       |      |        |       |      |       |      |       |      |       |       |      |        |       |       |      |       |       |      |        |

Compound

Normalized Values (A and B Sets)

Responses

| <b>ADX-47273</b> |                  |              |                        |                            | <table border="1"> <thead> <tr> <th colspan="7">Average Response</th> </tr> <tr> <th>Dose</th> <th>Green Signal</th> <th>Actual Pct Green Cells</th> <th>Normalized Pct Green Cells</th> <th>Red Signal</th> <th>Actual Pct Red Cells</th> <th>Normalized Pct Red Cells</th> </tr> </thead> <tbody> <tr> <td>0.1 uM</td> <td>112.07</td> <td>0.94</td> <td>153.69</td> <td>82.26</td> <td>0.06</td> <td>-29.48</td> </tr> <tr> <td>1 uM</td> <td>105.86</td> <td>0.88</td> <td>91.03</td> <td>86.76</td> <td>0.07</td> <td>-23.05</td> </tr> <tr> <td>10 uM</td> <td>107.31</td> <td>0.94</td> <td>321.84</td> <td>94.93</td> <td>0.07</td> <td>-23.50</td> </tr> </tbody> </table> |                      |                          |  |  |  |  | Average Response |  |  |  |  |  |  | Dose | Green Signal | Actual Pct Green Cells | Normalized Pct Green Cells | Red Signal | Actual Pct Red Cells | Normalized Pct Red Cells | 0.1 uM | 112.07 | 0.94 | 153.69 | 82.26 | 0.06 | -29.48 | 1 uM | 105.86 | 0.88 | 91.03 | 86.76 | 0.07 | -23.05 | 10 uM | 107.31 | 0.94 | 321.84 | 94.93 | 0.07 | -23.50 |
|------------------|------------------|--------------|------------------------|----------------------------|-------------------------------------------------------------------------------------------------------------------------------------------------------------------------------------------------------------------------------------------------------------------------------------------------------------------------------------------------------------------------------------------------------------------------------------------------------------------------------------------------------------------------------------------------------------------------------------------------------------------------------------------------------------------------------------|----------------------|--------------------------|--|--|--|--|------------------|--|--|--|--|--|--|------|--------------|------------------------|----------------------------|------------|----------------------|--------------------------|--------|--------|------|--------|-------|------|--------|------|--------|------|-------|-------|------|--------|-------|--------|------|--------|-------|------|--------|
|                  | Average Response |              |                        |                            |                                                                                                                                                                                                                                                                                                                                                                                                                                                                                                                                                                                                                                                                                     |                      |                          |  |  |  |  |                  |  |  |  |  |  |  |      |              |                        |                            |            |                      |                          |        |        |      |        |       |      |        |      |        |      |       |       |      |        |       |        |      |        |       |      |        |
|                  | Dose             | Green Signal | Actual Pct Green Cells | Normalized Pct Green Cells | Red Signal                                                                                                                                                                                                                                                                                                                                                                                                                                                                                                                                                                                                                                                                          | Actual Pct Red Cells | Normalized Pct Red Cells |  |  |  |  |                  |  |  |  |  |  |  |      |              |                        |                            |            |                      |                          |        |        |      |        |       |      |        |      |        |      |       |       |      |        |       |        |      |        |       |      |        |
|                  | 0.1 uM           | 112.07       | 0.94                   | 153.69                     | 82.26                                                                                                                                                                                                                                                                                                                                                                                                                                                                                                                                                                                                                                                                               | 0.06                 | -29.48                   |  |  |  |  |                  |  |  |  |  |  |  |      |              |                        |                            |            |                      |                          |        |        |      |        |       |      |        |      |        |      |       |       |      |        |       |        |      |        |       |      |        |
| 1 uM             | 105.86           | 0.88         | 91.03                  | 86.76                      | 0.07                                                                                                                                                                                                                                                                                                                                                                                                                                                                                                                                                                                                                                                                                | -23.05               |                          |  |  |  |  |                  |  |  |  |  |  |  |      |              |                        |                            |            |                      |                          |        |        |      |        |       |      |        |      |        |      |       |       |      |        |       |        |      |        |       |      |        |
| 10 uM            | 107.31           | 0.94         | 321.84                 | 94.93                      | 0.07                                                                                                                                                                                                                                                                                                                                                                                                                                                                                                                                                                                                                                                                                | -23.50               |                          |  |  |  |  |                  |  |  |  |  |  |  |      |              |                        |                            |            |                      |                          |        |        |      |        |       |      |        |      |        |      |       |       |      |        |       |        |      |        |       |      |        |

Compound

Normalized Values (A and B Sets)

Responses

| <b>AEE788 (NVP-AEE788)</b> |                  |              |                        |                            | <table border="1"> <thead> <tr> <th colspan="7">Average Response</th> </tr> <tr> <th>Dose</th> <th>Green Signal</th> <th>Actual Pct Green Cells</th> <th>Normalized Pct Green Cells</th> <th>Red Signal</th> <th>Actual Pct Red Cells</th> <th>Normalized Pct Red Cells</th> </tr> </thead> <tbody> <tr> <td>0.1 uM</td> <td>100.36</td> <td>0.86</td> <td>99.26</td> <td>100.81</td> <td>0.09</td> <td>-26.15</td> </tr> <tr> <td>1 uM</td> <td>88.64</td> <td>0.76</td> <td>-30.09</td> <td>101.50</td> <td>0.08</td> <td>-19.55</td> </tr> <tr> <td>10 uM</td> <td>122.34</td> <td>0.92</td> <td>130.83</td> <td>139.40</td> <td>0.17</td> <td>13.79</td> </tr> </tbody> </table> |                      |                          |  |  |  |  | Average Response |  |  |  |  |  |  | Dose | Green Signal | Actual Pct Green Cells | Normalized Pct Green Cells | Red Signal | Actual Pct Red Cells | Normalized Pct Red Cells | 0.1 uM | 100.36 | 0.86 | 99.26 | 100.81 | 0.09 | -26.15 | 1 uM | 88.64 | 0.76 | -30.09 | 101.50 | 0.08 | -19.55 | 10 uM | 122.34 | 0.92 | 130.83 | 139.40 | 0.17 | 13.79 |
|----------------------------|------------------|--------------|------------------------|----------------------------|--------------------------------------------------------------------------------------------------------------------------------------------------------------------------------------------------------------------------------------------------------------------------------------------------------------------------------------------------------------------------------------------------------------------------------------------------------------------------------------------------------------------------------------------------------------------------------------------------------------------------------------------------------------------------------------|----------------------|--------------------------|--|--|--|--|------------------|--|--|--|--|--|--|------|--------------|------------------------|----------------------------|------------|----------------------|--------------------------|--------|--------|------|-------|--------|------|--------|------|-------|------|--------|--------|------|--------|-------|--------|------|--------|--------|------|-------|
|                            | Average Response |              |                        |                            |                                                                                                                                                                                                                                                                                                                                                                                                                                                                                                                                                                                                                                                                                      |                      |                          |  |  |  |  |                  |  |  |  |  |  |  |      |              |                        |                            |            |                      |                          |        |        |      |       |        |      |        |      |       |      |        |        |      |        |       |        |      |        |        |      |       |
|                            | Dose             | Green Signal | Actual Pct Green Cells | Normalized Pct Green Cells | Red Signal                                                                                                                                                                                                                                                                                                                                                                                                                                                                                                                                                                                                                                                                           | Actual Pct Red Cells | Normalized Pct Red Cells |  |  |  |  |                  |  |  |  |  |  |  |      |              |                        |                            |            |                      |                          |        |        |      |       |        |      |        |      |       |      |        |        |      |        |       |        |      |        |        |      |       |
|                            | 0.1 uM           | 100.36       | 0.86                   | 99.26                      | 100.81                                                                                                                                                                                                                                                                                                                                                                                                                                                                                                                                                                                                                                                                               | 0.09                 | -26.15                   |  |  |  |  |                  |  |  |  |  |  |  |      |              |                        |                            |            |                      |                          |        |        |      |       |        |      |        |      |       |      |        |        |      |        |       |        |      |        |        |      |       |
| 1 uM                       | 88.64            | 0.76         | -30.09                 | 101.50                     | 0.08                                                                                                                                                                                                                                                                                                                                                                                                                                                                                                                                                                                                                                                                                 | -19.55               |                          |  |  |  |  |                  |  |  |  |  |  |  |      |              |                        |                            |            |                      |                          |        |        |      |       |        |      |        |      |       |      |        |        |      |        |       |        |      |        |        |      |       |
| 10 uM                      | 122.34           | 0.92         | 130.83                 | 139.40                     | 0.17                                                                                                                                                                                                                                                                                                                                                                                                                                                                                                                                                                                                                                                                                 | 13.79                |                          |  |  |  |  |                  |  |  |  |  |  |  |      |              |                        |                            |            |                      |                          |        |        |      |       |        |      |        |      |       |      |        |        |      |        |       |        |      |        |        |      |       |

Compound

Normalized Values (A and B Sets)

Responses

| Afinatinib (BIBW2992) | Percent Green Cells (AB) |  | Percent Red Cells (AB) |  | Average Response |              |                        |                            |            |                      |                          |
|-----------------------|--------------------------|--|------------------------|--|------------------|--------------|------------------------|----------------------------|------------|----------------------|--------------------------|
|                       | Percent Response         |  | Percent Response       |  | Dose             | Green Signal | Actual Pct Green Cells | Normalized Pct Green Cells | Red Signal | Actual Pct Red Cells | Normalized Pct Red Cells |
|                       | 100                      |  | 100                    |  | 0.1 uM           | 106.03       | 0.95                   | 158.47                     | 77.74      | 0.02                 | -60.88                   |
|                       | 0                        |  | 0                      |  | 1 uM             | 108.50       | 0.96                   | 251.53                     | 75.64      | 0.03                 | -35.06                   |
|                       | 0.1 uM                   |  | 0.1 uM                 |  | 10 uM            | 110.04       | 0.95                   | 133.80                     | 90.02      | 0.07                 | -19.26                   |
|                       | concentration            |  | concentration          |  |                  |              |                        |                            |            |                      |                          |

Compound

Normalized Values (A and B Sets)

Responses

| AG-18 | Percent Green Cells (AB) |  | Percent Red Cells (AB) |  | Average Response |              |                        |                            |            |                      |                          |
|-------|--------------------------|--|------------------------|--|------------------|--------------|------------------------|----------------------------|------------|----------------------|--------------------------|
|       | Percent Response         |  | Percent Response       |  | Dose             | Green Signal | Actual Pct Green Cells | Normalized Pct Green Cells | Red Signal | Actual Pct Red Cells | Normalized Pct Red Cells |
|       | 100                      |  | 100                    |  | 0.1 uM           | 99.52        | 0.89                   | 102.20                     | 55.48      | 0.01                 | -72.21                   |
|       | 0                        |  | 0                      |  | 1 uM             | 85.39        | 0.79                   | 246.11                     | 80.31      | 0.04                 | -28.70                   |
|       | 0.1 uM                   |  | 0.1 uM                 |  | 10 uM            | 79.98        | 0.72                   | -85.63                     | 61.29      | 0.02                 | -43.27                   |
|       | concentration            |  | concentration          |  |                  |              |                        |                            |            |                      |                          |

Compound

Normalized Values (A and B Sets)

Responses

| AG-490 (Tyrphostin B42) | Percent Green Cells (AB) |  | Percent Red Cells (AB) |  | Average Response                                                                                |                                                                                  |                                                                   |                            |            |                      |                          |
|-------------------------|--------------------------|--|------------------------|--|-------------------------------------------------------------------------------------------------|----------------------------------------------------------------------------------|-------------------------------------------------------------------|----------------------------|------------|----------------------|--------------------------|
|                         | Percent Response         |  | Percent Response       |  | Dose                                                                                            | Green Signal                                                                     | Actual Pct Green Cells                                            | Normalized Pct Green Cells | Red Signal | Actual Pct Red Cells | Normalized Pct Red Cells |
|                         | 100                      |  | 100                    |  | 0.1 uM                                                                                          | 94.19                                                                            | 0.89                                                              | 99.48                      | 75.89      | 0.01                 | -66.76                   |
|                         | 0                        |  | 0                      |  | 1 uM                                                                                            | 93.99                                                                            | 0.85                                                              | 292.22                     | 66.66      | 0.02                 | -40.44                   |
|                         | 0.1 uM                   |  | 0.1 uM                 |  | 10 uM <td>88.15 <td>0.84 <td>20.63</td> <td>71.19</td> <td>0.03 <th>-37.40</th> </td></td></td> | 88.15 <td>0.84 <td>20.63</td> <td>71.19</td> <td>0.03 <th>-37.40</th> </td></td> | 0.84 <td>20.63</td> <td>71.19</td> <td>0.03 <th>-37.40</th> </td> | 20.63                      | 71.19      | 0.03 <th>-37.40</th> | -37.40                   |
|                         | concentration            |  | concentration          |  |                                                                                                 |                                                                                  |                                                                   |                            |            |                      |                          |

Compound

Normalized Values (A and B Sets)

Responses

| AG-14361 | Percent Green Cells (AB) |  | Percent Red Cells (AB) |  | Average Response                                                                                 |                                                                                  |                        |                            |            |                      |                          |
|----------|--------------------------|--|------------------------|--|--------------------------------------------------------------------------------------------------|----------------------------------------------------------------------------------|------------------------|----------------------------|------------|----------------------|--------------------------|
|          | Percent Response         |  | Percent Response       |  | Dose                                                                                             | Green Signal                                                                     | Actual Pct Green Cells | Normalized Pct Green Cells | Red Signal | Actual Pct Red Cells | Normalized Pct Red Cells |
|          | 100                      |  | 100                    |  | 0.1 uM                                                                                           | 80.97                                                                            | 0.77                   | -30.28                     | 77.41      | 0.04                 | -35.82                   |
|          | 0                        |  | 0                      |  | 1 uM                                                                                             | 92.24                                                                            | 0.78                   | 42.99                      | 69.52      | 0.02                 | -48.26                   |
|          | 0.1 uM                   |  | 0.1 uM                 |  | 10 uM <td>99.89 <th>0.93</th> <th>165.28</th> <th>98.68</th> <th>0.08</th> <th>-20.24</th> </td> | 99.89 <th>0.93</th> <th>165.28</th> <th>98.68</th> <th>0.08</th> <th>-20.24</th> | 0.93                   | 165.28                     | 98.68      | 0.08                 | -20.24                   |
|          | concentration            |  | concentration          |  |                                                                                                  |                                                                                  |                        |                            |            |                      |                          |

Compound

Normalized Values (A and B Sets)

Responses

| AGI-5198 | Percent Green Cells (AB) |  | Percent Red Cells (AB) |  | Average Response                                                                                 |                                                                                  |                        |                            |            |                      |                          |
|----------|--------------------------|--|------------------------|--|--------------------------------------------------------------------------------------------------|----------------------------------------------------------------------------------|------------------------|----------------------------|------------|----------------------|--------------------------|
|          | Percent Response         |  | Percent Response       |  | Dose                                                                                             | Green Signal                                                                     | Actual Pct Green Cells | Normalized Pct Green Cells | Red Signal | Actual Pct Red Cells | Normalized Pct Red Cells |
|          | 100                      |  | 100                    |  | 0.1 uM                                                                                           | 118.52                                                                           | 0.97                   | 246.43                     | 104.30     | 0.15                 | 9.62                     |
|          | 0                        |  | 0                      |  | 1 uM                                                                                             | 109.15                                                                           | 0.89                   | 123.60                     | 124.58     | 0.23                 | 49.79                    |
|          | 0.1 uM                   |  | 0.1 uM                 |  | 10 uM <td>89.70 <th>0.74</th> <th>-27.51</th> <th>86.47</th> <th>0.06</th> <th>-32.20</th> </td> | 89.70 <th>0.74</th> <th>-27.51</th> <th>86.47</th> <th>0.06</th> <th>-32.20</th> | 0.74                   | -27.51                     | 86.47      | 0.06                 | -32.20                   |
|          | concentration            |  | concentration          |  |                                                                                                  |                                                                                  |                        |                            |            |                      |                          |

Compound

Normalized Values (A and B Sets)

Responses

| Agomelatine |       |      | Average Response |              |                        |                            |            |                      |                          |
|-------------|-------|------|------------------|--------------|------------------------|----------------------------|------------|----------------------|--------------------------|
|             |       |      | Dose             | Green Signal | Actual Pct Green Cells | Normalized Pct Green Cells | Red Signal | Actual Pct Red Cells | Normalized Pct Red Cells |
|             |       |      | 0.1 uM           | 95.63        | 0.85                   | 68.36                      | 75.70      | 0.02                 | -61.48                   |
|             |       |      | 1 uM             | 96.94        | 0.86                   | 52.23                      | 85.25      | 0.06                 | -31.14                   |
| 10 uM       | 86.65 | 0.75 | 16.20            | 106.76       | 0.07                   | -23.21                     |            |                      |                          |

Compound

Normalized Values (A and B Sets)

Responses

| Albendazole Oxide |        |      | Average Response |              |                        |                            |            |                      |                          |
|-------------------|--------|------|------------------|--------------|------------------------|----------------------------|------------|----------------------|--------------------------|
|                   |        |      | Dose             | Green Signal | Actual Pct Green Cells | Normalized Pct Green Cells | Red Signal | Actual Pct Red Cells | Normalized Pct Red Cells |
|                   |        |      | 0.1 uM           | 92.92        | 0.79                   | 25.17                      | 85.90      | 0.05                 | -50.04                   |
|                   |        |      | 1 uM             | 112.45       | 0.91                   | 89.61                      | 84.90      | 0.04                 | -41.12                   |
| 10 uM             | 103.42 | 0.86 | 91.23            | 101.48       | 0.07                   | -25.96                     |            |                      |                          |

Compound

Normalized Values (A and B Sets)

Responses

| Alectinib (CH5424802) |        |      | Average Response |              |                        |                            |            |                      |                          |
|-----------------------|--------|------|------------------|--------------|------------------------|----------------------------|------------|----------------------|--------------------------|
|                       |        |      | Dose             | Green Signal | Actual Pct Green Cells | Normalized Pct Green Cells | Red Signal | Actual Pct Red Cells | Normalized Pct Red Cells |
|                       |        |      | 0.1 uM           | 106.93       | 0.93                   | 140.64                     | 80.74      | 0.05                 | -32.46                   |
|                       |        |      | 1 uM             | 100.67       | 0.86                   | 83.69                      | 106.59     | 0.12                 | -0.35                    |
| 10 uM                 | 103.78 | 0.94 | 267.06           | 92.05        | 0.07                   | -22.34                     |            |                      |                          |

Compound

Normalized Values (A and B Sets)

Responses

| Alibendol |        |      | Average Response |              |                        |                            |            |                      |                          |
|-----------|--------|------|------------------|--------------|------------------------|----------------------------|------------|----------------------|--------------------------|
|           |        |      | Dose             | Green Signal | Actual Pct Green Cells | Normalized Pct Green Cells | Red Signal | Actual Pct Red Cells | Normalized Pct Red Cells |
|           |        |      | 0.1 uM           | 99.73        | 0.87                   | 88.21                      | 84.97      | 0.04                 | -48.74                   |
|           |        |      | 1 uM             | 90.50        | 0.74                   | -33.75                     | 89.84      | 0.08                 | -22.79                   |
| 10 uM     | 107.54 | 0.88 | 100.92           | 104.14       | 0.06                   | -26.87                     |            |                      |                          |

Compound

Normalized Values (A and B Sets)

Responses

| Alisertib (MLN8237) |       |      | Average Response |              |                        |                            |            |                      |                          |
|---------------------|-------|------|------------------|--------------|------------------------|----------------------------|------------|----------------------|--------------------------|
|                     |       |      | Dose             | Green Signal | Actual Pct Green Cells | Normalized Pct Green Cells | Red Signal | Actual Pct Red Cells | Normalized Pct Red Cells |
|                     |       |      | 0.1 uM           | 89.61        | 0.82                   | 27.64                      | 104.94     | 0.11                 | -23.33                   |
|                     |       |      | 1 uM             | 89.14        | 0.71                   | 15.42                      | 94.82      | 0.07                 | -24.57                   |
| 10 uM               | 96.38 | 0.82 | 66.56            | 92.61        | 0.04                   | -38.91                     |            |                      |                          |

| Compound                      | Normalized Values (A and B Sets) | Responses                                                                                                                                                                                                                                                                                                                                                                                                                                                                                                                                                                                                                                                                         |                  |                        |                            |            |                      |                          |  |      |              |                        |                            |            |                      |                          |        |       |      |        |       |      |        |      |        |      |       |       |      |        |       |       |      |       |        |      |        |
|-------------------------------|----------------------------------|-----------------------------------------------------------------------------------------------------------------------------------------------------------------------------------------------------------------------------------------------------------------------------------------------------------------------------------------------------------------------------------------------------------------------------------------------------------------------------------------------------------------------------------------------------------------------------------------------------------------------------------------------------------------------------------|------------------|------------------------|----------------------------|------------|----------------------|--------------------------|--|------|--------------|------------------------|----------------------------|------------|----------------------|--------------------------|--------|-------|------|--------|-------|------|--------|------|--------|------|-------|-------|------|--------|-------|-------|------|-------|--------|------|--------|
| <b>Aliskiren Hemifumarate</b> |                                  | <table border="1"> <thead> <tr> <th colspan="7">Average Response</th> </tr> <tr> <th>Dose</th> <th>Green Signal</th> <th>Actual Pct Green Cells</th> <th>Normalized Pct Green Cells</th> <th>Red Signal</th> <th>Actual Pct Red Cells</th> <th>Normalized Pct Red Cells</th> </tr> </thead> <tbody> <tr> <td>0.1 uM</td> <td>71.89</td> <td>0.61</td> <td>175.70</td> <td>63.96</td> <td>0.01</td> <td>-49.12</td> </tr> <tr> <td>1 uM</td> <td>101.82</td> <td>0.87</td> <td>90.86</td> <td>75.88</td> <td>0.02</td> <td>-44.89</td> </tr> <tr> <td>10 uM</td> <td>94.97</td> <td>0.90</td> <td>73.34</td> <td>103.75</td> <td>0.09</td> <td>-13.63</td> </tr> </tbody> </table> | Average Response |                        |                            |            |                      |                          |  | Dose | Green Signal | Actual Pct Green Cells | Normalized Pct Green Cells | Red Signal | Actual Pct Red Cells | Normalized Pct Red Cells | 0.1 uM | 71.89 | 0.61 | 175.70 | 63.96 | 0.01 | -49.12 | 1 uM | 101.82 | 0.87 | 90.86 | 75.88 | 0.02 | -44.89 | 10 uM | 94.97 | 0.90 | 73.34 | 103.75 | 0.09 | -13.63 |
|                               |                                  | Average Response                                                                                                                                                                                                                                                                                                                                                                                                                                                                                                                                                                                                                                                                  |                  |                        |                            |            |                      |                          |  |      |              |                        |                            |            |                      |                          |        |       |      |        |       |      |        |      |        |      |       |       |      |        |       |       |      |       |        |      |        |
|                               |                                  | Dose                                                                                                                                                                                                                                                                                                                                                                                                                                                                                                                                                                                                                                                                              | Green Signal     | Actual Pct Green Cells | Normalized Pct Green Cells | Red Signal | Actual Pct Red Cells | Normalized Pct Red Cells |  |      |              |                        |                            |            |                      |                          |        |       |      |        |       |      |        |      |        |      |       |       |      |        |       |       |      |       |        |      |        |
|                               |                                  | 0.1 uM                                                                                                                                                                                                                                                                                                                                                                                                                                                                                                                                                                                                                                                                            | 71.89            | 0.61                   | 175.70                     | 63.96      | 0.01                 | -49.12                   |  |      |              |                        |                            |            |                      |                          |        |       |      |        |       |      |        |      |        |      |       |       |      |        |       |       |      |       |        |      |        |
| 1 uM                          | 101.82                           | 0.87                                                                                                                                                                                                                                                                                                                                                                                                                                                                                                                                                                                                                                                                              | 90.86            | 75.88                  | 0.02                       | -44.89     |                      |                          |  |      |              |                        |                            |            |                      |                          |        |       |      |        |       |      |        |      |        |      |       |       |      |        |       |       |      |       |        |      |        |
| 10 uM                         | 94.97                            | 0.90                                                                                                                                                                                                                                                                                                                                                                                                                                                                                                                                                                                                                                                                              | 73.34            | 103.75                 | 0.09                       | -13.63     |                      |                          |  |      |              |                        |                            |            |                      |                          |        |       |      |        |       |      |        |      |        |      |       |       |      |        |       |       |      |       |        |      |        |

| Compound           | Normalized Values (A and B Sets) | Responses                                                                                                                                                                                                                                                                                                                                                                                                                                                                                                                                                                                                                                                                          |                  |                        |                            |            |                      |                          |  |      |              |                        |                            |            |                      |                          |        |        |      |        |        |      |       |      |       |      |       |        |      |        |       |        |      |       |        |      |       |
|--------------------|----------------------------------|------------------------------------------------------------------------------------------------------------------------------------------------------------------------------------------------------------------------------------------------------------------------------------------------------------------------------------------------------------------------------------------------------------------------------------------------------------------------------------------------------------------------------------------------------------------------------------------------------------------------------------------------------------------------------------|------------------|------------------------|----------------------------|------------|----------------------|--------------------------|--|------|--------------|------------------------|----------------------------|------------|----------------------|--------------------------|--------|--------|------|--------|--------|------|-------|------|-------|------|-------|--------|------|--------|-------|--------|------|-------|--------|------|-------|
| <b>Allopurinol</b> |                                  | <table border="1"> <thead> <tr> <th colspan="7">Average Response</th> </tr> <tr> <th>Dose</th> <th>Green Signal</th> <th>Actual Pct Green Cells</th> <th>Normalized Pct Green Cells</th> <th>Red Signal</th> <th>Actual Pct Red Cells</th> <th>Normalized Pct Red Cells</th> </tr> </thead> <tbody> <tr> <td>0.1 uM</td> <td>105.94</td> <td>0.90</td> <td>108.55</td> <td>105.88</td> <td>0.11</td> <td>-6.91</td> </tr> <tr> <td>1 uM</td> <td>93.92</td> <td>0.80</td> <td>-3.02</td> <td>101.68</td> <td>0.08</td> <td>-20.79</td> </tr> <tr> <td>10 uM</td> <td>109.01</td> <td>0.86</td> <td>89.86</td> <td>113.35</td> <td>0.11</td> <td>-4.67</td> </tr> </tbody> </table> | Average Response |                        |                            |            |                      |                          |  | Dose | Green Signal | Actual Pct Green Cells | Normalized Pct Green Cells | Red Signal | Actual Pct Red Cells | Normalized Pct Red Cells | 0.1 uM | 105.94 | 0.90 | 108.55 | 105.88 | 0.11 | -6.91 | 1 uM | 93.92 | 0.80 | -3.02 | 101.68 | 0.08 | -20.79 | 10 uM | 109.01 | 0.86 | 89.86 | 113.35 | 0.11 | -4.67 |
|                    |                                  | Average Response                                                                                                                                                                                                                                                                                                                                                                                                                                                                                                                                                                                                                                                                   |                  |                        |                            |            |                      |                          |  |      |              |                        |                            |            |                      |                          |        |        |      |        |        |      |       |      |       |      |       |        |      |        |       |        |      |       |        |      |       |
|                    |                                  | Dose                                                                                                                                                                                                                                                                                                                                                                                                                                                                                                                                                                                                                                                                               | Green Signal     | Actual Pct Green Cells | Normalized Pct Green Cells | Red Signal | Actual Pct Red Cells | Normalized Pct Red Cells |  |      |              |                        |                            |            |                      |                          |        |        |      |        |        |      |       |      |       |      |       |        |      |        |       |        |      |       |        |      |       |
|                    |                                  | 0.1 uM                                                                                                                                                                                                                                                                                                                                                                                                                                                                                                                                                                                                                                                                             | 105.94           | 0.90                   | 108.55                     | 105.88     | 0.11                 | -6.91                    |  |      |              |                        |                            |            |                      |                          |        |        |      |        |        |      |       |      |       |      |       |        |      |        |       |        |      |       |        |      |       |
| 1 uM               | 93.92                            | 0.80                                                                                                                                                                                                                                                                                                                                                                                                                                                                                                                                                                                                                                                                               | -3.02            | 101.68                 | 0.08                       | -20.79     |                      |                          |  |      |              |                        |                            |            |                      |                          |        |        |      |        |        |      |       |      |       |      |       |        |      |        |       |        |      |       |        |      |       |
| 10 uM              | 109.01                           | 0.86                                                                                                                                                                                                                                                                                                                                                                                                                                                                                                                                                                                                                                                                               | 89.86            | 113.35                 | 0.11                       | -4.67      |                      |                          |  |      |              |                        |                            |            |                      |                          |        |        |      |        |        |      |       |      |       |      |       |        |      |        |       |        |      |       |        |      |       |

| Compound                  | Normalized Values (A and B Sets) | Responses                                                                                                                                                                                                                                                                                                                                                                                                                                                                                                                                                                                                                                                                         |                  |                        |                            |            |                      |                          |  |      |              |                        |                            |            |                      |                          |        |        |      |       |        |      |      |      |        |      |       |        |      |      |       |        |      |        |        |      |        |
|---------------------------|----------------------------------|-----------------------------------------------------------------------------------------------------------------------------------------------------------------------------------------------------------------------------------------------------------------------------------------------------------------------------------------------------------------------------------------------------------------------------------------------------------------------------------------------------------------------------------------------------------------------------------------------------------------------------------------------------------------------------------|------------------|------------------------|----------------------------|------------|----------------------|--------------------------|--|------|--------------|------------------------|----------------------------|------------|----------------------|--------------------------|--------|--------|------|-------|--------|------|------|------|--------|------|-------|--------|------|------|-------|--------|------|--------|--------|------|--------|
| <b>Allopurinol Sodium</b> |                                  | <table border="1"> <thead> <tr> <th colspan="7">Average Response</th> </tr> <tr> <th>Dose</th> <th>Green Signal</th> <th>Actual Pct Green Cells</th> <th>Normalized Pct Green Cells</th> <th>Red Signal</th> <th>Actual Pct Red Cells</th> <th>Normalized Pct Red Cells</th> </tr> </thead> <tbody> <tr> <td>0.1 uM</td> <td>106.16</td> <td>0.87</td> <td>48.54</td> <td>115.62</td> <td>0.16</td> <td>9.37</td> </tr> <tr> <td>1 uM</td> <td>100.46</td> <td>0.85</td> <td>59.19</td> <td>112.54</td> <td>0.15</td> <td>9.09</td> </tr> <tr> <td>10 uM</td> <td>110.97</td> <td>0.90</td> <td>113.14</td> <td>102.93</td> <td>0.09</td> <td>-16.86</td> </tr> </tbody> </table> | Average Response |                        |                            |            |                      |                          |  | Dose | Green Signal | Actual Pct Green Cells | Normalized Pct Green Cells | Red Signal | Actual Pct Red Cells | Normalized Pct Red Cells | 0.1 uM | 106.16 | 0.87 | 48.54 | 115.62 | 0.16 | 9.37 | 1 uM | 100.46 | 0.85 | 59.19 | 112.54 | 0.15 | 9.09 | 10 uM | 110.97 | 0.90 | 113.14 | 102.93 | 0.09 | -16.86 |
|                           |                                  | Average Response                                                                                                                                                                                                                                                                                                                                                                                                                                                                                                                                                                                                                                                                  |                  |                        |                            |            |                      |                          |  |      |              |                        |                            |            |                      |                          |        |        |      |       |        |      |      |      |        |      |       |        |      |      |       |        |      |        |        |      |        |
|                           |                                  | Dose                                                                                                                                                                                                                                                                                                                                                                                                                                                                                                                                                                                                                                                                              | Green Signal     | Actual Pct Green Cells | Normalized Pct Green Cells | Red Signal | Actual Pct Red Cells | Normalized Pct Red Cells |  |      |              |                        |                            |            |                      |                          |        |        |      |       |        |      |      |      |        |      |       |        |      |      |       |        |      |        |        |      |        |
|                           |                                  | 0.1 uM                                                                                                                                                                                                                                                                                                                                                                                                                                                                                                                                                                                                                                                                            | 106.16           | 0.87                   | 48.54                      | 115.62     | 0.16                 | 9.37                     |  |      |              |                        |                            |            |                      |                          |        |        |      |       |        |      |      |      |        |      |       |        |      |      |       |        |      |        |        |      |        |
| 1 uM                      | 100.46                           | 0.85                                                                                                                                                                                                                                                                                                                                                                                                                                                                                                                                                                                                                                                                              | 59.19            | 112.54                 | 0.15                       | 9.09       |                      |                          |  |      |              |                        |                            |            |                      |                          |        |        |      |       |        |      |      |      |        |      |       |        |      |      |       |        |      |        |        |      |        |
| 10 uM                     | 110.97                           | 0.90                                                                                                                                                                                                                                                                                                                                                                                                                                                                                                                                                                                                                                                                              | 113.14           | 102.93                 | 0.09                       | -16.86     |                      |                          |  |      |              |                        |                            |            |                      |                          |        |        |      |       |        |      |      |      |        |      |       |        |      |      |       |        |      |        |        |      |        |

| Compound             | Normalized Values (A and B Sets) | Responses                                                                                                                                                                                                                                                                                                                                                                                                                                                                                                                                                                                                                                                                       |                  |                        |                            |            |                      |                          |  |      |              |                        |                            |            |                      |                          |        |       |      |       |       |      |        |      |       |      |       |       |      |        |       |       |      |        |       |      |        |
|----------------------|----------------------------------|---------------------------------------------------------------------------------------------------------------------------------------------------------------------------------------------------------------------------------------------------------------------------------------------------------------------------------------------------------------------------------------------------------------------------------------------------------------------------------------------------------------------------------------------------------------------------------------------------------------------------------------------------------------------------------|------------------|------------------------|----------------------------|------------|----------------------|--------------------------|--|------|--------------|------------------------|----------------------------|------------|----------------------|--------------------------|--------|-------|------|-------|-------|------|--------|------|-------|------|-------|-------|------|--------|-------|-------|------|--------|-------|------|--------|
| <b>Allylthiourea</b> |                                  | <table border="1"> <thead> <tr> <th colspan="7">Average Response</th> </tr> <tr> <th>Dose</th> <th>Green Signal</th> <th>Actual Pct Green Cells</th> <th>Normalized Pct Green Cells</th> <th>Red Signal</th> <th>Actual Pct Red Cells</th> <th>Normalized Pct Red Cells</th> </tr> </thead> <tbody> <tr> <td>0.1 uM</td> <td>86.10</td> <td>0.81</td> <td>44.42</td> <td>60.99</td> <td>0.01</td> <td>-57.62</td> </tr> <tr> <td>1 uM</td> <td>90.82</td> <td>0.80</td> <td>52.26</td> <td>75.97</td> <td>0.02</td> <td>-56.12</td> </tr> <tr> <td>10 uM</td> <td>68.54</td> <td>0.50</td> <td>-59.62</td> <td>78.17</td> <td>0.03</td> <td>-49.51</td> </tr> </tbody> </table> | Average Response |                        |                            |            |                      |                          |  | Dose | Green Signal | Actual Pct Green Cells | Normalized Pct Green Cells | Red Signal | Actual Pct Red Cells | Normalized Pct Red Cells | 0.1 uM | 86.10 | 0.81 | 44.42 | 60.99 | 0.01 | -57.62 | 1 uM | 90.82 | 0.80 | 52.26 | 75.97 | 0.02 | -56.12 | 10 uM | 68.54 | 0.50 | -59.62 | 78.17 | 0.03 | -49.51 |
|                      |                                  | Average Response                                                                                                                                                                                                                                                                                                                                                                                                                                                                                                                                                                                                                                                                |                  |                        |                            |            |                      |                          |  |      |              |                        |                            |            |                      |                          |        |       |      |       |       |      |        |      |       |      |       |       |      |        |       |       |      |        |       |      |        |
|                      |                                  | Dose                                                                                                                                                                                                                                                                                                                                                                                                                                                                                                                                                                                                                                                                            | Green Signal     | Actual Pct Green Cells | Normalized Pct Green Cells | Red Signal | Actual Pct Red Cells | Normalized Pct Red Cells |  |      |              |                        |                            |            |                      |                          |        |       |      |       |       |      |        |      |       |      |       |       |      |        |       |       |      |        |       |      |        |
|                      |                                  | 0.1 uM                                                                                                                                                                                                                                                                                                                                                                                                                                                                                                                                                                                                                                                                          | 86.10            | 0.81                   | 44.42                      | 60.99      | 0.01                 | -57.62                   |  |      |              |                        |                            |            |                      |                          |        |       |      |       |       |      |        |      |       |      |       |       |      |        |       |       |      |        |       |      |        |
| 1 uM                 | 90.82                            | 0.80                                                                                                                                                                                                                                                                                                                                                                                                                                                                                                                                                                                                                                                                            | 52.26            | 75.97                  | 0.02                       | -56.12     |                      |                          |  |      |              |                        |                            |            |                      |                          |        |       |      |       |       |      |        |      |       |      |       |       |      |        |       |       |      |        |       |      |        |
| 10 uM                | 68.54                            | 0.50                                                                                                                                                                                                                                                                                                                                                                                                                                                                                                                                                                                                                                                                            | -59.62           | 78.17                  | 0.03                       | -49.51     |                      |                          |  |      |              |                        |                            |            |                      |                          |        |       |      |       |       |      |        |      |       |      |       |       |      |        |       |       |      |        |       |      |        |

| Compound                  | Normalized Values (A and B Sets) | Responses                                                                                                                                                                                                                                                                                                                                                                                                                                                                                                                                                                                                                                                                            |                  |                        |                            |            |                      |                          |  |      |              |                        |                            |            |                      |                          |        |        |      |        |       |      |        |      |        |      |        |       |      |        |       |        |      |       |        |      |        |
|---------------------------|----------------------------------|--------------------------------------------------------------------------------------------------------------------------------------------------------------------------------------------------------------------------------------------------------------------------------------------------------------------------------------------------------------------------------------------------------------------------------------------------------------------------------------------------------------------------------------------------------------------------------------------------------------------------------------------------------------------------------------|------------------|------------------------|----------------------------|------------|----------------------|--------------------------|--|------|--------------|------------------------|----------------------------|------------|----------------------|--------------------------|--------|--------|------|--------|-------|------|--------|------|--------|------|--------|-------|------|--------|-------|--------|------|-------|--------|------|--------|
| <b>Almotriptan Malate</b> |                                  | <table border="1"> <thead> <tr> <th colspan="7">Average Response</th> </tr> <tr> <th>Dose</th> <th>Green Signal</th> <th>Actual Pct Green Cells</th> <th>Normalized Pct Green Cells</th> <th>Red Signal</th> <th>Actual Pct Red Cells</th> <th>Normalized Pct Red Cells</th> </tr> </thead> <tbody> <tr> <td>0.1 uM</td> <td>108.02</td> <td>0.90</td> <td>116.16</td> <td>91.02</td> <td>0.06</td> <td>-44.49</td> </tr> <tr> <td>1 uM</td> <td>119.64</td> <td>0.94</td> <td>154.52</td> <td>92.35</td> <td>0.06</td> <td>-30.77</td> </tr> <tr> <td>10 uM</td> <td>108.21</td> <td>0.87</td> <td>98.01</td> <td>108.71</td> <td>0.10</td> <td>-11.52</td> </tr> </tbody> </table> | Average Response |                        |                            |            |                      |                          |  | Dose | Green Signal | Actual Pct Green Cells | Normalized Pct Green Cells | Red Signal | Actual Pct Red Cells | Normalized Pct Red Cells | 0.1 uM | 108.02 | 0.90 | 116.16 | 91.02 | 0.06 | -44.49 | 1 uM | 119.64 | 0.94 | 154.52 | 92.35 | 0.06 | -30.77 | 10 uM | 108.21 | 0.87 | 98.01 | 108.71 | 0.10 | -11.52 |
|                           |                                  | Average Response                                                                                                                                                                                                                                                                                                                                                                                                                                                                                                                                                                                                                                                                     |                  |                        |                            |            |                      |                          |  |      |              |                        |                            |            |                      |                          |        |        |      |        |       |      |        |      |        |      |        |       |      |        |       |        |      |       |        |      |        |
|                           |                                  | Dose                                                                                                                                                                                                                                                                                                                                                                                                                                                                                                                                                                                                                                                                                 | Green Signal     | Actual Pct Green Cells | Normalized Pct Green Cells | Red Signal | Actual Pct Red Cells | Normalized Pct Red Cells |  |      |              |                        |                            |            |                      |                          |        |        |      |        |       |      |        |      |        |      |        |       |      |        |       |        |      |       |        |      |        |
|                           |                                  | 0.1 uM                                                                                                                                                                                                                                                                                                                                                                                                                                                                                                                                                                                                                                                                               | 108.02           | 0.90                   | 116.16                     | 91.02      | 0.06                 | -44.49                   |  |      |              |                        |                            |            |                      |                          |        |        |      |        |       |      |        |      |        |      |        |       |      |        |       |        |      |       |        |      |        |
| 1 uM                      | 119.64                           | 0.94                                                                                                                                                                                                                                                                                                                                                                                                                                                                                                                                                                                                                                                                                 | 154.52           | 92.35                  | 0.06                       | -30.77     |                      |                          |  |      |              |                        |                            |            |                      |                          |        |        |      |        |       |      |        |      |        |      |        |       |      |        |       |        |      |       |        |      |        |
| 10 uM                     | 108.21                           | 0.87                                                                                                                                                                                                                                                                                                                                                                                                                                                                                                                                                                                                                                                                                 | 98.01            | 108.71                 | 0.10                       | -11.52     |                      |                          |  |      |              |                        |                            |            |                      |                          |        |        |      |        |       |      |        |      |        |      |        |       |      |        |       |        |      |       |        |      |        |

Compound

Normalized Values (A and B Sets)

Responses

| Aloe-emodin |        |      | Average Response |              |                        |                            |            |                      |                          |
|-------------|--------|------|------------------|--------------|------------------------|----------------------------|------------|----------------------|--------------------------|
|             |        |      | Dose             | Green Signal | Actual Pct Green Cells | Normalized Pct Green Cells | Red Signal | Actual Pct Red Cells | Normalized Pct Red Cells |
|             |        |      | 0.1 uM           | 103.20       | 0.92                   | 126.82                     | 70.57      | 0.02                 | -43.86                   |
|             |        |      | 1 uM             | 94.18        | 0.75                   | 15.76                      | 73.66      | 0.03                 | -42.80                   |
| 10 uM       | 101.44 | 0.93 | 192.05           | 87.24        | 0.04                   | -40.93                     |            |                      |                          |

Compound

Normalized Values (A and B Sets)

Responses

| Alogliptin |       |      | Average Response |              |                        |                            |            |                      |                          |        |
|------------|-------|------|------------------|--------------|------------------------|----------------------------|------------|----------------------|--------------------------|--------|
|            |       |      | Dose             | Green Signal | Actual Pct Green Cells | Normalized Pct Green Cells | Red Signal | Actual Pct Red Cells | Normalized Pct Red Cells |        |
|            |       |      | 0.1 uM           | 75.70        | 0.69                   | -                          | 313.08     | 61.60                | 0.01                     | -58.80 |
|            |       |      | 1 uM             | 80.21        | 0.67                   | -39.59                     | 70.13      | 0.01                 | -61.54                   |        |
| 10 uM      | 88.00 | 0.79 | 24.98            | 79.21        | 0.04                   | -44.70                     |            |                      |                          |        |

Compound

Normalized Values (A and B Sets)

Responses

| Aloin |       |      | Average Response |              |                        |                            |            |                      |                          |
|-------|-------|------|------------------|--------------|------------------------|----------------------------|------------|----------------------|--------------------------|
|       |       |      | Dose             | Green Signal | Actual Pct Green Cells | Normalized Pct Green Cells | Red Signal | Actual Pct Red Cells | Normalized Pct Red Cells |
|       |       |      | 0.1 uM           | 96.05        | 0.88                   | 84.37                      | 88.28      | 0.08                 | -18.08                   |
|       |       |      | 1 uM             | 111.12       | 0.92                   | 115.10                     | 95.38      | 0.11                 | -6.69                    |
| 10 uM | 84.67 | 0.84 | 43.90            | 92.90        | 0.09                   | -16.97                     |            |                      |                          |

Compound

Normalized Values (A and B Sets)

Responses

| Aloperine |       |      | Average Response |              |                        |                            |            |                      |                          |
|-----------|-------|------|------------------|--------------|------------------------|----------------------------|------------|----------------------|--------------------------|
|           |       |      | Dose             | Green Signal | Actual Pct Green Cells | Normalized Pct Green Cells | Red Signal | Actual Pct Red Cells | Normalized Pct Red Cells |
|           |       |      | 0.1 uM           | 100.02       | 0.90                   | 101.90                     | 79.95      | 0.04                 | -35.14                   |
|           |       |      | 1 uM             | 92.12        | 0.79                   | 53.84                      | 84.15      | 0.05                 | -33.77                   |
| 10 uM     | 90.58 | 0.87 | -69.29           | 69.92        | 0.01                   | -52.21                     |            |                      |                          |

Compound

Normalized Values (A and B Sets)

Responses

| Altrenogest |       |      | Average Response |              |                        |                            |            |                      |                          |        |
|-------------|-------|------|------------------|--------------|------------------------|----------------------------|------------|----------------------|--------------------------|--------|
|             |       |      | Dose             | Green Signal | Actual Pct Green Cells | Normalized Pct Green Cells | Red Signal | Actual Pct Red Cells | Normalized Pct Red Cells |        |
|             |       |      | 0.1 uM           | 86.71        | 0.81                   | -                          | 226.41     | 67.18                | 0.02                     | -56.19 |
|             |       |      | 1 uM             | 84.50        | 0.70                   | -24.61                     | 70.68      | 0.02                 | -57.56                   |        |
| 10 uM       | 94.98 | 0.83 | 111.59           | 78.03        | 0.03                   | -47.92                     |            |                      |                          |        |

Compound

Normalized Values (A and B Sets)

Responses

| AM1241 | Percent Green Cells (AB) |     | Percent Red Cells (AB) |     | Average Response |              |                        |                            |            |                      |                          |
|--------|--------------------------|-----|------------------------|-----|------------------|--------------|------------------------|----------------------------|------------|----------------------|--------------------------|
|        | Percent Response         |     | Percent Response       |     | Dose             | Green Signal | Actual Pct Green Cells | Normalized Pct Green Cells | Red Signal | Actual Pct Red Cells | Normalized Pct Red Cells |
|        | 0.1 uM 1 uM 10 uM        |     | 0.1 uM 1 uM 10 uM      |     |                  |              |                        |                            |            |                      |                          |
|        | concentration            |     | concentration          |     |                  |              |                        |                            |            |                      |                          |
|        | 100                      | 95  | 100                    | 100 | 0.1 uM           | 106.52       | 0.92                   | 124.16                     | 99.78      | 0.08                 | -33.96                   |
|        | 100                      | 100 | 100                    | 0   | 1 uM             | 111.43       | 0.95                   | 146.90                     | 102.47     | 0.09                 | -17.30                   |
|        | 100                      | 100 | 100                    | 25  | 10 uM            | 107.12       | 0.89                   | 110.57                     | 124.06     | 0.14                 | 1.56                     |

Compound

Normalized Values (A and B Sets)

Responses

| Ambrisentan | Percent Green Cells (AB) |     | Percent Red Cells (AB) |    | Average Response |              |                        |                            |            |                      |                          |
|-------------|--------------------------|-----|------------------------|----|------------------|--------------|------------------------|----------------------------|------------|----------------------|--------------------------|
|             | Percent Response         |     | Percent Response       |    | Dose             | Green Signal | Actual Pct Green Cells | Normalized Pct Green Cells | Red Signal | Actual Pct Red Cells | Normalized Pct Red Cells |
|             | 0.1 uM 1 uM 10 uM        |     | 0.1 uM 1 uM 10 uM      |    |                  |              |                        |                            |            |                      |                          |
|             | concentration            |     | concentration          |    |                  |              |                        |                            |            |                      |                          |
|             | 100                      | 60  | 100                    | 10 | 0.1 uM           | 102.13       | 0.87                   | 79.90                      | 93.53      | 0.06                 | -40.74                   |
|             | 100                      | 80  | 100                    | 10 | 1 uM             | 100.67       | 0.82                   | 44.55                      | 109.95     | 0.12                 | -3.84                    |
|             | 100                      | 100 | 100                    | 25 | 10 uM            | 101.40       | 0.82                   | 66.52                      | 82.92      | 0.06                 | -27.58                   |

Compound

Normalized Values (A and B Sets)

Responses

| Amfenac Sodium Monohydrate | Percent Green Cells (AB) |     | Percent Red Cells (AB) |    | Average Response |              |                        |                            |            |                      |                          |
|----------------------------|--------------------------|-----|------------------------|----|------------------|--------------|------------------------|----------------------------|------------|----------------------|--------------------------|
|                            | Percent Response         |     | Percent Response       |    | Dose             | Green Signal | Actual Pct Green Cells | Normalized Pct Green Cells | Red Signal | Actual Pct Red Cells | Normalized Pct Red Cells |
|                            | 0.1 uM 1 uM 10 uM        |     | 0.1 uM 1 uM 10 uM      |    |                  |              |                        |                            |            |                      |                          |
|                            | concentration            |     | concentration          |    |                  |              |                        |                            |            |                      |                          |
|                            | 100                      | 100 | 100                    | 10 | 0.1 uM           | 89.98        | 0.81                   | 81.31                      | 80.12      | 0.04                 | -43.29                   |
|                            | 100                      | 55  | 100                    | 10 | 1 uM             | 89.12        | 0.76                   | 31.94                      | 89.31      | 0.08                 | -29.85                   |
|                            | 100                      | 100 | 100                    | 10 | 10 uM            | 116.16       | 0.96                   | 159.90                     | 103.49     | 0.05                 | -37.22                   |

Compound

Normalized Values (A and B Sets)

Responses

| AMG-458 | Percent Green Cells (AB) |     | Percent Red Cells (AB) |     | Average Response |              |                        |                            |            |                      |                          |
|---------|--------------------------|-----|------------------------|-----|------------------|--------------|------------------------|----------------------------|------------|----------------------|--------------------------|
|         | Percent Response         |     | Percent Response       |     | Dose             | Green Signal | Actual Pct Green Cells | Normalized Pct Green Cells | Red Signal | Actual Pct Red Cells | Normalized Pct Red Cells |
|         | 0.1 uM 1 uM 10 uM        |     | 0.1 uM 1 uM 10 uM      |     |                  |              |                        |                            |            |                      |                          |
|         | concentration            |     | concentration          |     |                  |              |                        |                            |            |                      |                          |
|         | 100                      | 100 | 100                    | 100 | 0.1 uM           | 95.28        | 0.90                   | 108.81                     | 86.64      | 0.06                 | -24.97                   |
|         | 100                      | 100 | 100                    | 100 | 1 uM             | 109.26       | 0.92                   | 114.96                     | 81.47      | 0.04                 | -37.16                   |
|         | 100                      | 100 | 100                    | 100 | 10 uM            | 82.52        | 0.82                   | 205.97                     | 87.28      | 0.05                 | -37.08                   |

Compound

Normalized Values (A and B Sets)

Responses

| AMG-517 | Percent Green Cells (AB) |     | Percent Red Cells (AB) |     | Average Response |              |                        |                            |            |                      |                          |
|---------|--------------------------|-----|------------------------|-----|------------------|--------------|------------------------|----------------------------|------------|----------------------|--------------------------|
|         | Percent Response         |     | Percent Response       |     | Dose             | Green Signal | Actual Pct Green Cells | Normalized Pct Green Cells | Red Signal | Actual Pct Red Cells | Normalized Pct Red Cells |
|         | 0.1 uM 1 uM 10 uM        |     | 0.1 uM 1 uM 10 uM      |     |                  |              |                        |                            |            |                      |                          |
|         | concentration            |     | concentration          |     |                  |              |                        |                            |            |                      |                          |
|         | 100                      | 100 | 100                    | 35  | 0.1 uM           | 98.32        | 0.86                   | 206.32                     | 125.40     | 0.25                 | 62.73                    |
|         | 100                      | 60  | 100                    | 100 | 1 uM             | 86.11        | 0.71                   | -14.51                     | 79.28      | 0.05                 | -41.71                   |
|         | 100                      | 100 | 100                    | 100 | 10 uM            | 94.53        | 0.77                   | 65.33                      | 93.43      | 0.08                 | -18.62                   |



Compound

Normalized Values (A and B Sets)

Responses

| AMG-900 | Percent Green Cells (AB) |      | Percent Red Cells (AB) |        | Average Response |              |                        |                            |            |                      |                          |       |       |
|---------|--------------------------|------|------------------------|--------|------------------|--------------|------------------------|----------------------------|------------|----------------------|--------------------------|-------|-------|
|         | Percent Response         |      | Percent Response       |        | Dose             | Green Signal | Actual Pct Green Cells | Normalized Pct Green Cells | Red Signal | Actual Pct Red Cells | Normalized Pct Red Cells |       |       |
|         | concentration            |      | concentration          |        | 0.1 uM           | 1 uM         | 10 uM                  | 0.1 uM                     | 1 uM       | 10 uM                | 0.1 uM                   | 1 uM  | 10 uM |
|         | 0.1 uM                   | 1 uM | 10 uM                  | 0.1 uM | 1 uM             | 10 uM        | 0.1 uM                 | 1 uM                       | 10 uM      | 0.1 uM               | 1 uM                     | 10 uM |       |
|         | 100                      | 100  | 0                      | 0      | 0.1 uM           | 95.93        | 0.91                   | 115.07                     | 76.62      | 0.04                 | -48.93                   |       |       |
|         |                          |      |                        |        | 1 uM             | 77.83        | 0.67                   | 653.14                     | 78.90      | 0.05                 | -22.09                   |       |       |
|         |                          |      |                        |        | 10 uM            | 91.10        | 0.84                   | 33.93                      | 95.97      | 0.11                 | -3.62                    |       |       |

Compound

Normalized Values (A and B Sets)

Responses

| Aminothiazole | Percent Green Cells (AB) |      | Percent Red Cells (AB) |        | Average Response |              |                        |                            |            |                      |                          |       |       |
|---------------|--------------------------|------|------------------------|--------|------------------|--------------|------------------------|----------------------------|------------|----------------------|--------------------------|-------|-------|
|               | Percent Response         |      | Percent Response       |        | Dose             | Green Signal | Actual Pct Green Cells | Normalized Pct Green Cells | Red Signal | Actual Pct Red Cells | Normalized Pct Red Cells |       |       |
|               | concentration            |      | concentration          |        | 0.1 uM           | 1 uM         | 10 uM                  | 0.1 uM                     | 1 uM       | 10 uM                | 0.1 uM                   | 1 uM  | 10 uM |
|               | 0.1 uM                   | 1 uM | 10 uM                  | 0.1 uM | 1 uM             | 10 uM        | 0.1 uM                 | 1 uM                       | 10 uM      | 0.1 uM               | 1 uM                     | 10 uM |       |
|               | 20                       | 20   | 100                    | 0      | 0.1 uM           | 81.54        | 0.80                   | 139.01                     | 72.22      | 0.02                 | -52.81                   |       |       |
|               |                          |      |                        |        | 1 uM             | 92.11        | 0.75                   | 20.80                      | 95.35      | 0.09                 | -19.77                   |       |       |
|               |                          |      |                        |        | 10 uM            | 98.52        | 0.83                   | 82.10                      | 89.71      | 0.07                 | -28.42                   |       |       |

Compound

Normalized Values (A and B Sets)

Responses

| Ammonium Glycyrrhizinate | Percent Green Cells (AB) |      | Percent Red Cells (AB) |        | Average Response |              |                        |                            |            |                      |                          |       |       |
|--------------------------|--------------------------|------|------------------------|--------|------------------|--------------|------------------------|----------------------------|------------|----------------------|--------------------------|-------|-------|
|                          | Percent Response         |      | Percent Response       |        | Dose             | Green Signal | Actual Pct Green Cells | Normalized Pct Green Cells | Red Signal | Actual Pct Red Cells | Normalized Pct Red Cells |       |       |
|                          | concentration            |      | concentration          |        | 0.1 uM           | 1 uM         | 10 uM                  | 0.1 uM                     | 1 uM       | 10 uM                | 0.1 uM                   | 1 uM  | 10 uM |
|                          | 0.1 uM                   | 1 uM | 10 uM                  | 0.1 uM | 1 uM             | 10 uM        | 0.1 uM                 | 1 uM                       | 10 uM      | 0.1 uM               | 1 uM                     | 10 uM |       |
|                          | 100                      | 90   | 100                    | 0      | 0.1 uM           | 101.65       | 0.94                   | 143.86                     | 96.85      | 0.10                 | -6.49                    |       |       |
|                          |                          |      |                        |        | 1 uM             | 97.40        | 0.83                   | 60.38                      | 86.44      | 0.06                 | -28.65                   |       |       |
|                          |                          |      |                        |        | 10 uM            | 89.15        | 0.88                   | 163.39                     | 88.82      | 0.05                 | -32.59                   |       |       |

Compound

Normalized Values (A and B Sets)

Responses

| Amorolfine HCl | Percent Green Cells (AB) |      | Percent Red Cells (AB) |        | Average Response |              |                        |                            |            |                      |                          |       |       |
|----------------|--------------------------|------|------------------------|--------|------------------|--------------|------------------------|----------------------------|------------|----------------------|--------------------------|-------|-------|
|                | Percent Response         |      | Percent Response       |        | Dose             | Green Signal | Actual Pct Green Cells | Normalized Pct Green Cells | Red Signal | Actual Pct Red Cells | Normalized Pct Red Cells |       |       |
|                | concentration            |      | concentration          |        | 0.1 uM           | 1 uM         | 10 uM                  | 0.1 uM                     | 1 uM       | 10 uM                | 0.1 uM                   | 1 uM  | 10 uM |
|                | 0.1 uM                   | 1 uM | 10 uM                  | 0.1 uM | 1 uM             | 10 uM        | 0.1 uM                 | 1 uM                       | 10 uM      | 0.1 uM               | 1 uM                     | 10 uM |       |
|                | 65                       | 80   | 100                    | 25     | 0.1 uM           | 98.38        | 0.87                   | 72.90                      | 113.04     | 0.14                 | -5.79                    |       |       |
|                |                          |      |                        |        | 1 uM             | 110.73       | 0.90                   | 85.39                      | 110.35     | 0.13                 | 1.30                     |       |       |
|                |                          |      |                        |        | 10 uM            | 106.10       | 0.87                   | 91.42                      | 114.03     | 0.11                 | -3.13                    |       |       |

Compound

Normalized Values (A and B Sets)

Responses

| Amoxicillin Sodium | Percent Green Cells (AB) |      | Percent Red Cells (AB) |        | Average Response |              |                        |                            |            |                      |                          |       |       |
|--------------------|--------------------------|------|------------------------|--------|------------------|--------------|------------------------|----------------------------|------------|----------------------|--------------------------|-------|-------|
|                    | Percent Response         |      | Percent Response       |        | Dose             | Green Signal | Actual Pct Green Cells | Normalized Pct Green Cells | Red Signal | Actual Pct Red Cells | Normalized Pct Red Cells |       |       |
|                    | concentration            |      | concentration          |        | 0.1 uM           | 1 uM         | 10 uM                  | 0.1 uM                     | 1 uM       | 10 uM                | 0.1 uM                   | 1 uM  | 10 uM |
|                    | 0.1 uM                   | 1 uM | 10 uM                  | 0.1 uM | 1 uM             | 10 uM        | 0.1 uM                 | 1 uM                       | 10 uM      | 0.1 uM               | 1 uM                     | 10 uM |       |
|                    | 70                       | 80   | 100                    | 0      | 0.1 uM           | 96.54        | 0.87                   | 73.34                      | 75.08      | 0.03                 | -38.74                   |       |       |
|                    |                          |      |                        |        | 1 uM             | 104.20       | 0.88                   | 90.88                      | 107.60     | 0.11                 | -6.74                    |       |       |
|                    |                          |      |                        |        | 10 uM            | 98.60        | 0.89                   | 149.85                     | 83.82      | 0.03                 | -43.44                   |       |       |



Compound

Normalized Values (A and B Sets)

Responses

| Amphotericin B | Percent Green Cells (AB)   |  | Percent Red Cells (AB)     |  | Average Response |              |                        |                            |            |                      |                          |
|----------------|----------------------------|--|----------------------------|--|------------------|--------------|------------------------|----------------------------|------------|----------------------|--------------------------|
|                | 100<br>75<br>50<br>25<br>0 |  | 100<br>75<br>50<br>25<br>0 |  | Dose             | Green Signal | Actual Pct Green Cells | Normalized Pct Green Cells | Red Signal | Actual Pct Red Cells | Normalized Pct Red Cells |
|                | 0.1 uM 1 uM 10 uM          |  | 0.1 uM 1 uM 10 uM          |  | 0.1 uM           | 101.82       | 0.86                   | 76.61                      | 102.13     | 0.10                 | -17.23                   |
|                | concentration              |  | concentration              |  | 1 uM             | 100.02       | 0.82                   | 73.31                      | 102.66     | 0.09                 | -17.34                   |
|                |                            |  |                            |  | 10 uM            | 108.10       | 0.87                   | 92.58                      | 116.82     | 0.11                 | -9.13                    |

Compound

Normalized Values (A and B Sets)

Responses

| Amprenavir | Percent Green Cells (AB)   |  | Percent Red Cells (AB)     |  | Average Response |              |                        |                            |            |                      |                          |
|------------|----------------------------|--|----------------------------|--|------------------|--------------|------------------------|----------------------------|------------|----------------------|--------------------------|
|            | 100<br>75<br>50<br>25<br>0 |  | 100<br>75<br>50<br>25<br>0 |  | Dose             | Green Signal | Actual Pct Green Cells | Normalized Pct Green Cells | Red Signal | Actual Pct Red Cells | Normalized Pct Red Cells |
|            | 0.1 uM 1 uM 10 uM          |  | 0.1 uM 1 uM 10 uM          |  | 0.1 uM           | 99.88        | 0.88                   | 82.38                      | 96.98      | 0.08                 | -32.56                   |
|            | concentration              |  | concentration              |  | 1 uM             | 108.01       | 0.89                   | 112.09                     | 108.14     | 0.10                 | -10.46                   |
|            |                            |  |                            |  | 10 uM            | 112.32       | 0.90                   | 115.66                     | 86.62      | 0.04                 | -37.75                   |

Compound

Normalized Values (A and B Sets)

Responses

| Amuvatinib (MP-470) | Percent Green Cells (AB)   |  | Percent Red Cells (AB)     |  | Average Response |              |                        |                            |            |                      |                          |
|---------------------|----------------------------|--|----------------------------|--|------------------|--------------|------------------------|----------------------------|------------|----------------------|--------------------------|
|                     | 100<br>75<br>50<br>25<br>0 |  | 100<br>75<br>50<br>25<br>0 |  | Dose             | Green Signal | Actual Pct Green Cells | Normalized Pct Green Cells | Red Signal | Actual Pct Red Cells | Normalized Pct Red Cells |
|                     | 0.1 uM 1 uM 10 uM          |  | 0.1 uM 1 uM 10 uM          |  | 0.1 uM           | 93.44        | 0.88                   | 91.80                      | 91.65      | 0.05                 | -47.26                   |
|                     | concentration              |  | concentration              |  | 1 uM             | 105.61       | 0.82                   | 67.32                      | 119.34     | 0.17                 | 18.57                    |
|                     |                            |  |                            |  | 10 uM            | 99.11        | 0.84                   | 78.35                      | 124.07     | 0.16                 | 14.21                    |

Compound

Normalized Values (A and B Sets)

Responses

| Anacetrapib (MK-0859) | Percent Green Cells (AB)   |  | Percent Red Cells (AB)     |  | Average Response |              |                        |                            |            |                      |                          |
|-----------------------|----------------------------|--|----------------------------|--|------------------|--------------|------------------------|----------------------------|------------|----------------------|--------------------------|
|                       | 100<br>75<br>50<br>25<br>0 |  | 100<br>75<br>50<br>25<br>0 |  | Dose             | Green Signal | Actual Pct Green Cells | Normalized Pct Green Cells | Red Signal | Actual Pct Red Cells | Normalized Pct Red Cells |
|                       | 0.1 uM 1 uM 10 uM          |  | 0.1 uM 1 uM 10 uM          |  | 0.1 uM           | 88.06        | 0.82                   | 17.58                      | 77.70      | 0.03                 | -41.18                   |
|                       | concentration              |  | concentration              |  | 1 uM             | 101.02       | 0.83                   | 72.07                      | 92.53      | 0.07                 | -25.70                   |
|                       |                            |  |                            |  | 10 uM            | 94.41        | 0.89                   | 16.91                      | 82.19      | 0.04                 | -37.32                   |

Compound

Normalized Values (A and B Sets)

Responses

| Anagrelide | Percent Green Cells (AB)   |  | Percent Red Cells (AB)     |  | Average Response |              |                        |                            |            |                      |                          |
|------------|----------------------------|--|----------------------------|--|------------------|--------------|------------------------|----------------------------|------------|----------------------|--------------------------|
|            | 100<br>75<br>50<br>25<br>0 |  | 100<br>75<br>50<br>25<br>0 |  | Dose             | Green Signal | Actual Pct Green Cells | Normalized Pct Green Cells | Red Signal | Actual Pct Red Cells | Normalized Pct Red Cells |
|            | 0.1 uM 1 uM 10 uM          |  | 0.1 uM 1 uM 10 uM          |  | 0.1 uM           | 97.40        | 0.88                   | 99.72                      | 71.74      | 0.02                 | -65.03                   |
|            | concentration              |  | concentration              |  | 1 uM             | 97.71        | 0.88                   | 179.93                     | 80.83      | 0.05                 | -21.57                   |
|            |                            |  |                            |  | 10 uM            | 88.63        | 0.80                   | -10.66                     | 83.47      | 0.07                 | -18.45                   |

Compound

Normalized Values (A and B Sets)

Responses

| Compound       | Normalized Values (A and B Sets) |  | Average Response |              |                        |                            |            |                      |                          |
|----------------|----------------------------------|--|------------------|--------------|------------------------|----------------------------|------------|----------------------|--------------------------|
|                |                                  |  | Dose             | Green Signal | Actual Pct Green Cells | Normalized Pct Green Cells | Red Signal | Actual Pct Red Cells | Normalized Pct Red Cells |
| Anagrelide HCl |                                  |  | 0.1 uM           | 92.21        | 0.88                   | -49.49                     | 95.43      | 0.16                 | 18.72                    |
|                |                                  |  | 1 uM             | 77.83        | 0.63                   | -64.99                     | 81.86      | 0.06                 | -37.78                   |
|                |                                  |  | 10 uM            | 78.78        | 0.63                   | 158.82                     | 63.36      | 0.01                 | -57.98                   |

Compound

Normalized Values (A and B Sets)

Responses

| Compound | Normalized Values (A and B Sets) |  | Average Response |              |                        |                            |            |                      |                          |
|----------|----------------------------------|--|------------------|--------------|------------------------|----------------------------|------------|----------------------|--------------------------|
|          |                                  |  | Dose             | Green Signal | Actual Pct Green Cells | Normalized Pct Green Cells | Red Signal | Actual Pct Red Cells | Normalized Pct Red Cells |
| Andarine |                                  |  | 0.1 uM           | 92.78        | 0.87                   | 80.53                      | 74.96      | 0.02                 | -63.76                   |
|          |                                  |  | 1 uM             | 93.32        | 0.74                   | 21.36                      | 96.82      | 0.06                 | -31.57                   |
|          |                                  |  | 10 uM            | 99.63        | 0.83                   | 72.03                      | 98.98      | 0.07                 | -25.72                   |

Compound

Normalized Values (A and B Sets)

Responses

| Compound        | Normalized Values (A and B Sets) |  | Average Response |              |                        |                            |            |                      |                          |
|-----------------|----------------------------------|--|------------------|--------------|------------------------|----------------------------|------------|----------------------|--------------------------|
|                 |                                  |  | Dose             | Green Signal | Actual Pct Green Cells | Normalized Pct Green Cells | Red Signal | Actual Pct Red Cells | Normalized Pct Red Cells |
| Andrographolide |                                  |  | 0.1 uM           | 113.56       | 0.94                   | 151.63                     | 103.47     | 0.13                 | 6.76                     |
|                 |                                  |  | 1 uM             | 103.63       | 0.82                   | 68.42                      | 116.14     | 0.22                 | 41.72                    |
|                 |                                  |  | 10 uM            | 112.04       | 0.90                   | -88.66                     | 112.03     | 0.20                 | 34.14                    |

Compound

Normalized Values (A and B Sets)

Responses

| Compound                   | Normalized Values (A and B Sets) |  | Average Response |              |                        |                            |            |                      |                          |
|----------------------------|----------------------------------|--|------------------|--------------|------------------------|----------------------------|------------|----------------------|--------------------------|
|                            |                                  |  | Dose             | Green Signal | Actual Pct Green Cells | Normalized Pct Green Cells | Red Signal | Actual Pct Red Cells | Normalized Pct Red Cells |
| Anisotropine Methylbromide |                                  |  | 0.1 uM           | 92.31        | 0.86                   | 17.53                      | 74.98      | 0.04                 | -43.14                   |
|                            |                                  |  | 1 uM             | 95.59        | 0.80                   | 54.18                      | 91.77      | 0.09                 | -23.18                   |
|                            |                                  |  | 10 uM            | 92.31        | 0.76                   | -63.94                     | 97.32      | 0.10                 | -9.05                    |

Compound

Normalized Values (A and B Sets)

Responses

| Compound | Normalized Values (A and B Sets) |  | Average Response |              |                        |                            |            |                      |                          |
|----------|----------------------------------|--|------------------|--------------|------------------------|----------------------------|------------|----------------------|--------------------------|
|          |                                  |  | Dose             | Green Signal | Actual Pct Green Cells | Normalized Pct Green Cells | Red Signal | Actual Pct Red Cells | Normalized Pct Red Cells |
| AP26113  |                                  |  | 0.1 uM           | 82.96        | 0.74                   | 493.79                     | 73.48      | 0.04                 | -42.88                   |
|          |                                  |  | 1 uM             | 106.80       | 0.85                   | 100.01                     | 97.94      | 0.10                 | -17.87                   |
|          |                                  |  | 10 uM            | 96.79        | 0.73                   | 42.23                      | 101.67     | 0.17                 | 25.91                    |

Compound

Normalized Values (A and B Sets)

Responses

| Apatinib | Percent Green Cells (AB) |      | Percent Red Cells (AB) |        | Average Response |              |                        |                            |            |                      |                          |        |       |
|----------|--------------------------|------|------------------------|--------|------------------|--------------|------------------------|----------------------------|------------|----------------------|--------------------------|--------|-------|
|          | Percent Response         |      | Percent Response       |        | Dose             | Green Signal | Actual Pct Green Cells | Normalized Pct Green Cells | Red Signal | Actual Pct Red Cells | Normalized Pct Red Cells |        |       |
|          | concentration            |      | concentration          |        | 0.1 uM           | 1 uM         | 10 uM                  | 0.1 uM                     | 1 uM       | 10 uM                | 0.1 uM                   | 1 uM   | 10 uM |
|          | 0.1 uM                   | 1 uM | 10 uM                  | 0.1 uM | 1 uM             | 10 uM        | 0.1 uM                 | 1 uM                       | 10 uM      | 0.1 uM               | 1 uM                     | 10 uM  |       |
|          | 100                      | 100  | 100                    | 0      | 0                | 0            | 0                      | 0                          | 0          | 0                    | 0                        | 0      |       |
|          | 15                       | 100  | 100                    | 0      | 40               | 25           | 96.29                  | 0.88                       | 86.54      | 93.00                | 0.09                     | -14.45 |       |
|          | 100                      | 60   | 100                    | 0      | 0                | 0            | 108.38                 | 0.87                       | 82.45      | 106.82               | 0.15                     | 11.59  |       |
|          | 100                      | 100  | 100                    | 0      | 0                | 0            | 103.12                 | 0.96                       | 428.00     | 112.12               | 0.14                     | 6.77   |       |

Compound

Normalized Values (A and B Sets)

Responses

| Apixaban | Percent Green Cells (AB) |      | Percent Red Cells (AB) |        | Average Response |              |                        |                            |            |                      |                          |        |       |
|----------|--------------------------|------|------------------------|--------|------------------|--------------|------------------------|----------------------------|------------|----------------------|--------------------------|--------|-------|
|          | Percent Response         |      | Percent Response       |        | Dose             | Green Signal | Actual Pct Green Cells | Normalized Pct Green Cells | Red Signal | Actual Pct Red Cells | Normalized Pct Red Cells |        |       |
|          | concentration            |      | concentration          |        | 0.1 uM           | 1 uM         | 10 uM                  | 0.1 uM                     | 1 uM       | 10 uM                | 0.1 uM                   | 1 uM   | 10 uM |
|          | 0.1 uM                   | 1 uM | 10 uM                  | 0.1 uM | 1 uM             | 10 uM        | 0.1 uM                 | 1 uM                       | 10 uM      | 0.1 uM               | 1 uM                     | 10 uM  |       |
|          | 100                      | 100  | 100                    | 0      | 0                | 0            | 0                      | 0                          | 0          | 0                    | 0                        | 0      |       |
|          | 100                      | 75   | 100                    | 0      | 15               | 0            | 100.23                 | 0.91                       | 116.95     | 99.17                | 0.07                     | -37.92 |       |
|          | 100                      | 100  | 100                    | 0      | 0                | 0            | 108.60                 | 0.92                       | 116.20     | 101.21               | 0.10                     | -10.83 |       |
|          | 100                      | 100  | 100                    | 0      | 0                | 0            | 82.57                  | 0.67                       | -33.48     | 100.61               | 0.07                     | -25.34 |       |

Compound

Normalized Values (A and B Sets)

Responses

| Apocynin | Percent Green Cells (AB) |      | Percent Red Cells (AB) |        | Average Response |              |                        |                            |            |                      |                          |        |       |
|----------|--------------------------|------|------------------------|--------|------------------|--------------|------------------------|----------------------------|------------|----------------------|--------------------------|--------|-------|
|          | Percent Response         |      | Percent Response       |        | Dose             | Green Signal | Actual Pct Green Cells | Normalized Pct Green Cells | Red Signal | Actual Pct Red Cells | Normalized Pct Red Cells |        |       |
|          | concentration            |      | concentration          |        | 0.1 uM           | 1 uM         | 10 uM                  | 0.1 uM                     | 1 uM       | 10 uM                | 0.1 uM                   | 1 uM   | 10 uM |
|          | 0.1 uM                   | 1 uM | 10 uM                  | 0.1 uM | 1 uM             | 10 uM        | 0.1 uM                 | 1 uM                       | 10 uM      | 0.1 uM               | 1 uM                     | 10 uM  |       |
|          | 100                      | 100  | 100                    | 0      | 0                | 0            | 0                      | 0                          | 0          | 0                    | 0                        | 0      |       |
|          | 100                      | 65   | 100                    | 0      | 0                | 0            | 98.95                  | 0.89                       | 94.95      | 97.03                | 0.10                     | -8.63  |       |
|          | 100                      | 100  | 100                    | 0      | 0                | 0            | 96.71                  | 0.78                       | 47.58      | 74.63                | 0.03                     | -43.94 |       |
|          | 100                      | 100  | 100                    | 0      | 0                | 0            | 85.91                  | 0.68                       | 1670.69    | 79.32                | 0.03                     | -43.08 |       |

Compound

Normalized Values (A and B Sets)

Responses

| Apogossypolone (ApoG2) | Percent Green Cells (AB) |      | Percent Red Cells (AB) |        | Average Response |              |                        |                            |            |                      |                          |        |       |
|------------------------|--------------------------|------|------------------------|--------|------------------|--------------|------------------------|----------------------------|------------|----------------------|--------------------------|--------|-------|
|                        | Percent Response         |      | Percent Response       |        | Dose             | Green Signal | Actual Pct Green Cells | Normalized Pct Green Cells | Red Signal | Actual Pct Red Cells | Normalized Pct Red Cells |        |       |
|                        | concentration            |      | concentration          |        | 0.1 uM           | 1 uM         | 10 uM                  | 0.1 uM                     | 1 uM       | 10 uM                | 0.1 uM                   | 1 uM   | 10 uM |
|                        | 0.1 uM                   | 1 uM | 10 uM                  | 0.1 uM | 1 uM             | 10 uM        | 0.1 uM                 | 1 uM                       | 10 uM      | 0.1 uM               | 1 uM                     | 10 uM  |       |
|                        | 30                       | 30   | 100                    | 0      | 0                | 0            | 88.33                  | 0.81                       | 31.52      | 88.76                | 0.06                     | -38.37 |       |
|                        | 100                      | 100  | 100                    | 0      | 60               | 30           | 97.89                  | 0.89                       | -40.78     | 90.60                | 0.11                     | 17.82  |       |
|                        | 100                      | 100  | 100                    | 0      | 0                | 0            | 103.45                 | 0.95                       | 128.94     | 103.09               | 0.14                     | 13.27  |       |

Compound

Normalized Values (A and B Sets)

Responses

| Apoptosis Activator 2 | Percent Green Cells (AB) |      | Percent Red Cells (AB) |        | Average Response |              |                        |                            |            |                      |                          |        |       |
|-----------------------|--------------------------|------|------------------------|--------|------------------|--------------|------------------------|----------------------------|------------|----------------------|--------------------------|--------|-------|
|                       | Percent Response         |      | Percent Response       |        | Dose             | Green Signal | Actual Pct Green Cells | Normalized Pct Green Cells | Red Signal | Actual Pct Red Cells | Normalized Pct Red Cells |        |       |
|                       | concentration            |      | concentration          |        | 0.1 uM           | 1 uM         | 10 uM                  | 0.1 uM                     | 1 uM       | 10 uM                | 0.1 uM                   | 1 uM   | 10 uM |
|                       | 0.1 uM                   | 1 uM | 10 uM                  | 0.1 uM | 1 uM             | 10 uM        | 0.1 uM                 | 1 uM                       | 10 uM      | 0.1 uM               | 1 uM                     | 10 uM  |       |
|                       | 100                      | 100  | 100                    | 0      | 0                | 0            | 92.02                  | 0.84                       | 181.48     | 83.46                | 0.04                     | -45.93 |       |
|                       | 100                      | 90   | 100                    | 0      | 0                | 0            | 90.10                  | 0.77                       | 41.99      | 70.59                | 0.02                     | -55.74 |       |
|                       | 100                      | 100  | 100                    | 0      | 0                | 0            | 95.11                  | 0.84                       | 83.41      | 89.06                | 0.08                     | -24.03 |       |

Compound

Normalized Values (A and B Sets)

Responses

| Apremilast (CC-10004) |       |      | Average Response |              |                        |                            |            |                      |                          |
|-----------------------|-------|------|------------------|--------------|------------------------|----------------------------|------------|----------------------|--------------------------|
|                       |       |      | Dose             | Green Signal | Actual Pct Green Cells | Normalized Pct Green Cells | Red Signal | Actual Pct Red Cells | Normalized Pct Red Cells |
|                       |       |      | 0.1 uM           | 94.69        | 0.88                   | 94.21                      | 95.62      | 0.11                 | -6.43                    |
|                       |       |      | 1 uM             | 91.35        | 0.85                   | -35.72                     | 63.99      | 0.01                 | -41.22                   |
| 10 uM                 | 75.20 | 0.67 | 123.87           | 88.13        | 0.06                   | -25.79                     |            |                      |                          |

Compound

Normalized Values (A and B Sets)

Responses

| Aprepitant |        |      | Average Response |              |                        |                            |            |                      |                          |
|------------|--------|------|------------------|--------------|------------------------|----------------------------|------------|----------------------|--------------------------|
|            |        |      | Dose             | Green Signal | Actual Pct Green Cells | Normalized Pct Green Cells | Red Signal | Actual Pct Red Cells | Normalized Pct Red Cells |
|            |        |      | 0.1 uM           | 97.98        | 0.90                   | 100.20                     | 98.22      | 0.07                 | -36.55                   |
|            |        |      | 1 uM             | 112.28       | 0.89                   | 97.12                      | 117.04     | 0.14                 | 8.32                     |
| 10 uM      | 100.95 | 0.83 | 69.27            | 115.51       | 0.11                   | -8.70                      |            |                      |                          |

Compound

Normalized Values (A and B Sets)

Responses

| AR-42 |        |      | Average Response |              |                        |                            |            |                      |                          |
|-------|--------|------|------------------|--------------|------------------------|----------------------------|------------|----------------------|--------------------------|
|       |        |      | Dose             | Green Signal | Actual Pct Green Cells | Normalized Pct Green Cells | Red Signal | Actual Pct Red Cells | Normalized Pct Red Cells |
|       |        |      | 0.1 uM           | 91.09        | 0.81                   | 9.64                       | 101.96     | 0.13                 | 3.98                     |
|       |        |      | 1 uM             | 118.02       | 0.92                   | 113.30                     | 144.62     | 0.22                 | 40.50                    |
| 10 uM | 116.49 | 0.86 | 345.20           | 113.94       | 0.11                   | -4.41                      |            |                      |                          |

Compound

Normalized Values (A and B Sets)

Responses

| AR-A 014418 |       |      | Average Response |              |                        |                            |            |                      |                          |
|-------------|-------|------|------------------|--------------|------------------------|----------------------------|------------|----------------------|--------------------------|
|             |       |      | Dose             | Green Signal | Actual Pct Green Cells | Normalized Pct Green Cells | Red Signal | Actual Pct Red Cells | Normalized Pct Red Cells |
|             |       |      | 0.1 uM           | 99.66        | 0.89                   | 98.18                      | 88.66      | 0.06                 | -34.82                   |
|             |       |      | 1 uM             | 74.98        | 0.66                   | 661.64                     | 101.50     | 0.17                 | 14.56                    |
| 10 uM       | 94.55 | 0.90 | 87.22            | 83.91        | 0.08                   | -14.14                     |            |                      |                          |

Compound

Normalized Values (A and B Sets)

Responses

| Arbidol HCl |       |      | Average Response |              |                        |                            |            |                      |                          |
|-------------|-------|------|------------------|--------------|------------------------|----------------------------|------------|----------------------|--------------------------|
|             |       |      | Dose             | Green Signal | Actual Pct Green Cells | Normalized Pct Green Cells | Red Signal | Actual Pct Red Cells | Normalized Pct Red Cells |
|             |       |      | 0.1 uM           | 100.85       | 0.90                   | 108.08                     | 89.57      | 0.06                 | -35.82                   |
|             |       |      | 1 uM             | 96.11        | 0.87                   | 215.64                     | 87.64      | 0.08                 | -0.82                    |
| 10 uM       | 99.98 | 0.94 | 118.29           | 91.42        | 0.12                   | 2.27                       |            |                      |                          |

Compound

Normalized Values (A and B Sets)

Responses

| ARN-509 | Percent Green Cells (AB) |  | Percent Red Cells (AB)  |  | Average Response |              |                        |                            |            |                      |                          |
|---------|--------------------------|--|-------------------------|--|------------------|--------------|------------------------|----------------------------|------------|----------------------|--------------------------|
|         | 100<br>Percent Response  |  | 100<br>Percent Response |  | Dose             | Green Signal | Actual Pct Green Cells | Normalized Pct Green Cells | Red Signal | Actual Pct Red Cells | Normalized Pct Red Cells |
|         | 0.1 uM 1 uM 10 uM        |  | 0.1 uM 1 uM 10 uM       |  | 0.1 uM           | 104.64       | 0.92                   | 124.00                     | 101.51     | 0.12                 | 0.16                     |
|         | concentration            |  | concentration           |  | 1 uM             | 93.95        | 0.77                   | 34.81                      | 104.46     | 0.11                 | -6.46                    |
|         |                          |  |                         |  | 10 uM            | 105.18       | 0.92                   | 231.72                     | 95.89      | 0.09                 | -15.19                   |

Compound

Normalized Values (A and B Sets)

Responses

| Asenapine | Percent Green Cells (AB) |  | Percent Red Cells (AB)  |  | Average Response |              |                        |                            |            |                      |                          |
|-----------|--------------------------|--|-------------------------|--|------------------|--------------|------------------------|----------------------------|------------|----------------------|--------------------------|
|           | 100<br>Percent Response  |  | 100<br>Percent Response |  | Dose             | Green Signal | Actual Pct Green Cells | Normalized Pct Green Cells | Red Signal | Actual Pct Red Cells | Normalized Pct Red Cells |
|           | 0.1 uM 1 uM 10 uM        |  | 0.1 uM 1 uM 10 uM       |  | 0.1 uM           | 94.22        | 0.83                   | 57.36                      | 98.46      | 0.11                 | -14.73                   |
|           | concentration            |  | concentration           |  | 1 uM             | 104.55       | 0.89                   | 116.62                     | 114.02     | 0.14                 | 4.18                     |
|           |                          |  |                         |  | 10 uM            | 100.70       | 0.93                   | 134.87                     | 109.84     | 0.07                 | -24.89                   |

Compound

Normalized Values (A and B Sets)

Responses

| Asiatic Acid | Percent Green Cells (AB) |  | Percent Red Cells (AB)  |  | Average Response |              |                        |                            |            |                      |                          |
|--------------|--------------------------|--|-------------------------|--|------------------|--------------|------------------------|----------------------------|------------|----------------------|--------------------------|
|              | 100<br>Percent Response  |  | 100<br>Percent Response |  | Dose             | Green Signal | Actual Pct Green Cells | Normalized Pct Green Cells | Red Signal | Actual Pct Red Cells | Normalized Pct Red Cells |
|              | 0.1 uM 1 uM 10 uM        |  | 0.1 uM 1 uM 10 uM       |  | 0.1 uM           | 106.14       | 0.92                   | 121.25                     | 78.25      | 0.04                 | -36.10                   |
|              | concentration            |  | concentration           |  | 1 uM             | 93.90        | 0.78                   | 49.35                      | 84.03      | 0.07                 | -24.98                   |
|              |                          |  |                         |  | 10 uM            | 101.50       | 0.93                   | 321.49                     | 100.35     | 0.10                 | -10.26                   |

Compound

Normalized Values (A and B Sets)

Responses

| AST-1306 | Percent Green Cells (AB) |  | Percent Red Cells (AB)  |  | Average Response |              |                        |                            |            |                      |                          |
|----------|--------------------------|--|-------------------------|--|------------------|--------------|------------------------|----------------------------|------------|----------------------|--------------------------|
|          | 100<br>Percent Response  |  | 100<br>Percent Response |  | Dose             | Green Signal | Actual Pct Green Cells | Normalized Pct Green Cells | Red Signal | Actual Pct Red Cells | Normalized Pct Red Cells |
|          | 0.1 uM 1 uM 10 uM        |  | 0.1 uM 1 uM 10 uM       |  | 0.1 uM           | 93.24        | 0.85                   | 60.59                      | 60.51      | 0.01                 | -50.75                   |
|          | concentration            |  | concentration           |  | 1 uM             | 90.03        | 0.74                   | 27.17                      | 66.89      | 0.02                 | -48.87                   |
|          |                          |  |                         |  | 10 uM            | 112.31       | 0.97                   | 402.72                     | 82.97      | 0.04                 | -37.74                   |

Compound

Normalized Values (A and B Sets)

Responses

| Astragaloside A | Percent Green Cells (AB) |  | Percent Red Cells (AB)  |  | Average Response |              |                        |                            |            |                      |                          |
|-----------------|--------------------------|--|-------------------------|--|------------------|--------------|------------------------|----------------------------|------------|----------------------|--------------------------|
|                 | 100<br>Percent Response  |  | 100<br>Percent Response |  | Dose             | Green Signal | Actual Pct Green Cells | Normalized Pct Green Cells | Red Signal | Actual Pct Red Cells | Normalized Pct Red Cells |
|                 | 0.1 uM 1 uM 10 uM        |  | 0.1 uM 1 uM 10 uM       |  | 0.1 uM           | 99.79        | 0.83                   | 21.32                      | 94.88      | 0.12                 | -0.49                    |
|                 | concentration            |  | concentration           |  | 1 uM             | 82.61        | 0.71                   | 1.40                       | 85.96      | 0.06                 | -27.40                   |
|                 |                          |  |                         |  | 10 uM            | 106.07       | 0.93                   | 324.51                     | 94.98      | 0.09                 | -16.76                   |

Compound

Normalized Values (A and B Sets)

Responses

| AT7519 | Percent Green Cells (AB) |  | Percent Red Cells (AB) |  | Average Response |              |                        |                            |            |                      |                          |
|--------|--------------------------|--|------------------------|--|------------------|--------------|------------------------|----------------------------|------------|----------------------|--------------------------|
|        | Percent Response         |  | Percent Response       |  | Dose             | Green Signal | Actual Pct Green Cells | Normalized Pct Green Cells | Red Signal | Actual Pct Red Cells | Normalized Pct Red Cells |
|        | 100                      |  | 100                    |  | 0.1 uM           | 99.57        | 0.86                   | 40.82                      | 110.16     | 0.13                 | -4.17                    |
|        | 0                        |  | 0                      |  | 1 uM             | 90.28        | 0.73                   | -26.95                     | 96.61      | 0.07                 | -27.23                   |
|        | 0.1 uM                   |  | 1 uM                   |  | 10 uM            | 92.33        | 0.73                   | -13.94                     | 102.78     | 0.09                 | -11.86                   |
|        | concentration            |  | concentration          |  |                  |              |                        |                            |            |                      |                          |

Compound

Normalized Values (A and B Sets)

Responses

| AT7867 | Percent Green Cells (AB) |  | Percent Red Cells (AB) |  | Average Response |              |                        |                            |            |                      |                          |
|--------|--------------------------|--|------------------------|--|------------------|--------------|------------------------|----------------------------|------------|----------------------|--------------------------|
|        | Percent Response         |  | Percent Response       |  | Dose             | Green Signal | Actual Pct Green Cells | Normalized Pct Green Cells | Red Signal | Actual Pct Red Cells | Normalized Pct Red Cells |
|        | 100                      |  | 100                    |  | 0.1 uM           | 112.58       | 0.92                   | 125.77                     | 83.61      | 0.05                 | -49.86                   |
|        | 0                        |  | 0                      |  | 1 uM             | 115.57       | 0.89                   | 103.38                     | 96.07      | 0.07                 | -25.17                   |
|        | 0.1 uM                   |  | 1 uM                   |  | 10 uM            | 109.92       | 0.85                   | 87.58                      | 117.19     | 0.13                 | 3.35                     |
|        | concentration            |  | concentration          |  |                  |              |                        |                            |            |                      |                          |

Compound

Normalized Values (A and B Sets)

Responses

| AT9283 | Percent Green Cells (AB) |  | Percent Red Cells (AB) |  | Average Response |              |                        |                            |            |                      |                          |
|--------|--------------------------|--|------------------------|--|------------------|--------------|------------------------|----------------------------|------------|----------------------|--------------------------|
|        | Percent Response         |  | Percent Response       |  | Dose             | Green Signal | Actual Pct Green Cells | Normalized Pct Green Cells | Red Signal | Actual Pct Red Cells | Normalized Pct Red Cells |
|        | 100                      |  | 100                    |  | 0.1 uM           | 62.85        | 0.44                   | 428.51                     | 83.51      | 0.06                 | -43.19                   |
|        | 0                        |  | 0                      |  | 1 uM             | 92.65        | 0.78                   | -0.71                      | 112.89     | 0.12                 | -3.71                    |
|        | 0.1 uM                   |  | 1 uM                   |  | 10 uM            | 90.19        | 0.63                   | -64.60                     | 103.17     | 0.10                 | -9.12                    |
|        | concentration            |  | concentration          |  |                  |              |                        |                            |            |                      |                          |

Compound

Normalized Values (A and B Sets)

Responses

| AT13387 | Percent Green Cells (AB) |  | Percent Red Cells (AB) |  | Average Response |              |                        |                            |            |                      |                          |
|---------|--------------------------|--|------------------------|--|------------------|--------------|------------------------|----------------------------|------------|----------------------|--------------------------|
|         | Percent Response         |  | Percent Response       |  | Dose             | Green Signal | Actual Pct Green Cells | Normalized Pct Green Cells | Red Signal | Actual Pct Red Cells | Normalized Pct Red Cells |
|         | 100                      |  | 100                    |  | 0.1 uM           | 118.03       | 0.94                   | 133.17                     | 95.54      | 0.08                 | -31.62                   |
|         | 0                        |  | 0                      |  | 1 uM             | 114.72       | 0.79                   | -17.73                     | 107.47     | 0.14                 | 5.07                     |
|         | 0.1 uM                   |  | 1 uM                   |  | 10 uM            | 106.75       | 0.82                   | 60.88                      | 113.74     | 0.12                 | 2.09                     |
|         | concentration            |  | concentration          |  |                  |              |                        |                            |            |                      |                          |

Compound

Normalized Values (A and B Sets)

Responses

| Ataluren (PTC124) | Percent Green Cells (AB) |  | Percent Red Cells (AB) |  | Average Response |              |                        |                            |            |                      |                          |
|-------------------|--------------------------|--|------------------------|--|------------------|--------------|------------------------|----------------------------|------------|----------------------|--------------------------|
|                   | Percent Response         |  | Percent Response       |  | Dose             | Green Signal | Actual Pct Green Cells | Normalized Pct Green Cells | Red Signal | Actual Pct Red Cells | Normalized Pct Red Cells |
|                   | 100                      |  | 100                    |  | 0.1 uM           | 95.97        | 0.87                   | 51.78                      | 109.74     | 0.16                 | 17.88                    |
|                   | 0                        |  | 0                      |  | 1 uM             | 92.94        | 0.78                   | 44.80                      | 80.05      | 0.05                 | -42.52                   |
|                   | 0.1 uM                   |  | 1 uM                   |  | 10 uM            | 76.13        | 0.59                   | 227.38                     | 84.29      | 0.06                 | -31.45                   |
|                   | concentration            |  | concentration          |  |                  |              |                        |                            |            |                      |                          |

Compound

Normalized Values (A and B Sets)

Responses

|                           |        |                         |              |                        |                            |            |                      |                          |
|---------------------------|--------|-------------------------|--------------|------------------------|----------------------------|------------|----------------------|--------------------------|
| <b>Atazanavir Sulfate</b> |        | <b>Average Response</b> |              |                        |                            |            |                      |                          |
|                           |        | Dose                    | Green Signal | Actual Pct Green Cells | Normalized Pct Green Cells | Red Signal | Actual Pct Red Cells | Normalized Pct Red Cells |
|                           |        | 0.1 uM                  | 108.38       | 0.91                   | 108.24                     | 111.59     | 0.14                 | 0.12                     |
|                           |        | 1 uM                    | 99.00        | 0.79                   | 31.61                      | 96.88      | 0.09                 | -17.80                   |
| 10 uM                     | 107.42 | 0.85                    | 85.37        | 131.17                 | 0.18                       | 18.19      |                      |                          |

Compound

Normalized Values (A and B Sets)

Responses

|                             |       |                         |              |                        |                            |            |                      |                          |
|-----------------------------|-------|-------------------------|--------------|------------------------|----------------------------|------------|----------------------|--------------------------|
| <b>Atorvastatin Calcium</b> |       | <b>Average Response</b> |              |                        |                            |            |                      |                          |
|                             |       | Dose                    | Green Signal | Actual Pct Green Cells | Normalized Pct Green Cells | Red Signal | Actual Pct Red Cells | Normalized Pct Red Cells |
|                             |       | 0.1 uM                  | 101.28       | 0.88                   | 85.49                      | 85.69      | 0.04                 | -52.10                   |
|                             |       | 1 uM                    | 99.92        | 0.85                   | 69.91                      | 93.07      | 0.05                 | -32.25                   |
| 10 uM                       | 89.70 | 0.62                    | -72.24       | 89.32                  | 0.08                       | -16.88     |                      |                          |

Compound

Normalized Values (A and B Sets)

Responses

|                            |        |                         |              |                        |                            |            |                      |                          |
|----------------------------|--------|-------------------------|--------------|------------------------|----------------------------|------------|----------------------|--------------------------|
| <b>Atracurium Besylate</b> |        | <b>Average Response</b> |              |                        |                            |            |                      |                          |
|                            |        | Dose                    | Green Signal | Actual Pct Green Cells | Normalized Pct Green Cells | Red Signal | Actual Pct Red Cells | Normalized Pct Red Cells |
|                            |        | 0.1 uM                  | 107.75       | 0.91                   | 131.70                     | 75.08      | 0.03                 | -52.39                   |
|                            |        | 1 uM                    | 111.04       | 0.89                   | 124.74                     | 93.49      | 0.06                 | -30.91                   |
| 10 uM                      | 107.24 | 0.87                    | 97.84        | 106.37                 | 0.08                       | -21.33     |                      |                          |

Compound

Normalized Values (A and B Sets)

Responses

|                 |       |                         |              |                        |                            |            |                      |                          |
|-----------------|-------|-------------------------|--------------|------------------------|----------------------------|------------|----------------------|--------------------------|
| <b>Atropine</b> |       | <b>Average Response</b> |              |                        |                            |            |                      |                          |
|                 |       | Dose                    | Green Signal | Actual Pct Green Cells | Normalized Pct Green Cells | Red Signal | Actual Pct Red Cells | Normalized Pct Red Cells |
|                 |       | 0.1 uM                  | 93.97        | 0.89                   | 91.85                      | 85.45      | 0.06                 | -26.10                   |
|                 |       | 1 uM                    | 99.11        | 0.84                   | 80.76                      | 92.37      | 0.08                 | -21.83                   |
| 10 uM           | 91.41 | 0.90                    | 37.23        | 102.75                 | 0.08                       | -20.42     |                      |                          |

Compound

Normalized Values (A and B Sets)

Responses

|                             |        |                         |              |                        |                            |            |                      |                          |
|-----------------------------|--------|-------------------------|--------------|------------------------|----------------------------|------------|----------------------|--------------------------|
| <b>Aurora A Inhibitor I</b> |        | <b>Average Response</b> |              |                        |                            |            |                      |                          |
|                             |        | Dose                    | Green Signal | Actual Pct Green Cells | Normalized Pct Green Cells | Red Signal | Actual Pct Red Cells | Normalized Pct Red Cells |
|                             |        | 0.1 uM                  | 117.30       | 0.95                   | 137.35                     | 101.85     | 0.09                 | -22.27                   |
|                             |        | 1 uM                    | 93.47        | 0.78                   | -15.00                     | 89.79      | 0.06                 | -32.27                   |
| 10 uM                       | 109.98 | 0.62                    | -68.57       | 110.38                 | 0.16                       | 16.52      |                      |                          |



Compound

Normalized Values (A and B Sets)

Responses

| AUY922 (NVP-AUY922) | Percent Green Cells (AB) |  | Percent Red Cells (AB) |  | Average Response |              |                        |                            |            |                      |                          |
|---------------------|--------------------------|--|------------------------|--|------------------|--------------|------------------------|----------------------------|------------|----------------------|--------------------------|
|                     | Percent Response         |  | Percent Response       |  | Dose             | Green Signal | Actual Pct Green Cells | Normalized Pct Green Cells | Red Signal | Actual Pct Red Cells | Normalized Pct Red Cells |
|                     | 100                      |  | 100                    |  | 0.1 uM           | 128.43       | 0.91                   | 124.41                     | 94.48      | 0.11                 | -15.86                   |
|                     | 0                        |  | 0                      |  | 1 uM             | 105.70       | 0.82                   | -12.54                     | 106.68     | 0.12                 | -4.39                    |
|                     | 0.1 uM                   |  | 0.1 uM                 |  | 10 uM            | 94.35        | 0.73                   | -1.04                      | 110.93     | 0.09                 | -14.32                   |

Compound

Normalized Values (A and B Sets)

Responses

| Avagacestat (BMS-708163) | Percent Green Cells (AB) |  | Percent Red Cells (AB) |  | Average Response |              |                        |                            |            |                      |                          |
|--------------------------|--------------------------|--|------------------------|--|------------------|--------------|------------------------|----------------------------|------------|----------------------|--------------------------|
|                          | Percent Response         |  | Percent Response       |  | Dose             | Green Signal | Actual Pct Green Cells | Normalized Pct Green Cells | Red Signal | Actual Pct Red Cells | Normalized Pct Red Cells |
|                          | 100                      |  | 100                    |  | 0.1 uM           | 84.84        | 0.74                   | 4.39                       | 79.65      | 0.03                 | -57.93                   |
|                          | 0                        |  | 0                      |  | 1 uM             | 96.19        | 0.86                   | 78.32                      | 92.64      | 0.04                 | -37.87                   |
|                          | 0.1 uM                   |  | 0.1 uM                 |  | 10 uM            | 105.10       | 0.90                   | 113.24                     | 96.87      | 0.04                 | -36.85                   |

Compound

Normalized Values (A and B Sets)

Responses

| Avanafil | Percent Green Cells (AB) |  | Percent Red Cells (AB) |  | Average Response |              |                        |                            |            |                      |                          |
|----------|--------------------------|--|------------------------|--|------------------|--------------|------------------------|----------------------------|------------|----------------------|--------------------------|
|          | Percent Response         |  | Percent Response       |  | Dose             | Green Signal | Actual Pct Green Cells | Normalized Pct Green Cells | Red Signal | Actual Pct Red Cells | Normalized Pct Red Cells |
|          | 100                      |  | 100                    |  | 0.1 uM           | 76.05        | 0.69                   | 148.77                     | 59.56      | 0.01                 | -59.41                   |
|          | 0                        |  | 0                      |  | 1 uM             | 87.72        | 0.75                   | 17.74                      | 62.71      | 0.01                 | -64.85                   |
|          | 0.1 uM                   |  | 0.1 uM                 |  | 10 uM            | 85.49        | 0.78                   | 0.46                       | 75.08      | 0.07                 | -26.66                   |

Compound

Normalized Values (A and B Sets)

Responses

| Avasimibe | Percent Green Cells (AB) |  | Percent Red Cells (AB) |  | Average Response |              |                        |                            |            |                      |                          |
|-----------|--------------------------|--|------------------------|--|------------------|--------------|------------------------|----------------------------|------------|----------------------|--------------------------|
|           | Percent Response         |  | Percent Response       |  | Dose             | Green Signal | Actual Pct Green Cells | Normalized Pct Green Cells | Red Signal | Actual Pct Red Cells | Normalized Pct Red Cells |
|           | 100                      |  | 100                    |  | 0.1 uM           | 80.98        | 0.74                   | -51.83                     | 68.31      | 0.02                 | -47.89                   |
|           | 0                        |  | 0                      |  | 1 uM             | 99.62        | 0.84                   | 66.05                      | 74.12      | 0.03                 | -42.60                   |
|           | 0.1 uM                   |  | 0.1 uM                 |  | 10 uM            | 95.28        | 0.91                   | 98.78                      | 93.68      | 0.07                 | -26.33                   |

Compound

Normalized Values (A and B Sets)

Responses

| AVL-292 | Percent Green Cells (AB) |  | Percent Red Cells (AB) |  | Average Response |              |                        |                            |            |                      |                          |
|---------|--------------------------|--|------------------------|--|------------------|--------------|------------------------|----------------------------|------------|----------------------|--------------------------|
|         | Percent Response         |  | Percent Response       |  | Dose             | Green Signal | Actual Pct Green Cells | Normalized Pct Green Cells | Red Signal | Actual Pct Red Cells | Normalized Pct Red Cells |
|         | 100                      |  | 100                    |  | 0.1 uM           | 94.62        | 0.87                   | 77.66                      | 112.03     | 0.17                 | 23.13                    |
|         | 0                        |  | 0                      |  | 1 uM             | 95.19        | 0.81                   | 62.97                      | 95.14      | 0.09                 | -21.85                   |
|         | 0.1 uM                   |  | 0.1 uM                 |  | 10 uM            | 80.07        | 0.68                   | 46.44                      | 91.74      | 0.07                 | -25.05                   |



Compound

Normalized Values (A and B Sets)

Responses

| AZ 23 | Percent Green Cells (AB) |      | Percent Red Cells (AB) |        | Average Response |              |                        |                            |            |                      |                          |       |       |
|-------|--------------------------|------|------------------------|--------|------------------|--------------|------------------------|----------------------------|------------|----------------------|--------------------------|-------|-------|
|       | Percent Response         |      | Percent Response       |        | Dose             | Green Signal | Actual Pct Green Cells | Normalized Pct Green Cells | Red Signal | Actual Pct Red Cells | Normalized Pct Red Cells |       |       |
|       | concentration            |      | concentration          |        | 0.1 uM           | 1 uM         | 10 uM                  | 0.1 uM                     | 1 uM       | 10 uM                | 0.1 uM                   | 1 uM  | 10 uM |
|       | 0.1 uM                   | 1 uM | 10 uM                  | 0.1 uM | 1 uM             | 10 uM        | 0.1 uM                 | 1 uM                       | 10 uM      | 0.1 uM               | 1 uM                     | 10 uM |       |
|       | 100                      | 40   | 85                     | 0      | 0.1 uM           | 90.49        | 0.81                   | 25.28                      | 88.24      | 0.06                 | -40.98                   |       |       |
|       |                          |      |                        |        | 1 uM             | 83.23        | 0.78                   | 480.67                     | 76.70      | 0.05                 | -31.70                   |       |       |
|       |                          |      |                        |        | 10 uM            | 94.16        | 0.79                   | -18.50                     | 119.24     | 0.26                 | 63.28                    |       |       |

Compound

Normalized Values (A and B Sets)

Responses

| AZ 628 | Percent Green Cells (AB) |      | Percent Red Cells (AB) |        | Average Response |              |                        |                            |            |                      |                          |       |       |
|--------|--------------------------|------|------------------------|--------|------------------|--------------|------------------------|----------------------------|------------|----------------------|--------------------------|-------|-------|
|        | Percent Response         |      | Percent Response       |        | Dose             | Green Signal | Actual Pct Green Cells | Normalized Pct Green Cells | Red Signal | Actual Pct Red Cells | Normalized Pct Red Cells |       |       |
|        | concentration            |      | concentration          |        | 0.1 uM           | 1 uM         | 10 uM                  | 0.1 uM                     | 1 uM       | 10 uM                | 0.1 uM                   | 1 uM  | 10 uM |
|        | 0.1 uM                   | 1 uM | 10 uM                  | 0.1 uM | 1 uM             | 10 uM        | 0.1 uM                 | 1 uM                       | 10 uM      | 0.1 uM               | 1 uM                     | 10 uM |       |
|        | 100                      | 100  | 60                     | 35     | 0.1 uM           | 91.28        | 0.86                   | 66.51                      | 107.41     | 0.17                 | 22.96                    |       |       |
|        |                          |      |                        |        | 1 uM             | 89.18        | 0.79                   | 54.39                      | 106.75     | 0.14                 | 5.54                     |       |       |
|        |                          |      |                        |        | 10 uM            | 105.68       | 0.89                   | 96.34                      | 87.30      | 0.10                 | -12.96                   |       |       |

Compound

Normalized Values (A and B Sets)

Responses

| AZ 960 | Percent Green Cells (AB) |      | Percent Red Cells (AB) |        | Average Response |              |                        |                            |            |                      |                          |       |       |
|--------|--------------------------|------|------------------------|--------|------------------|--------------|------------------------|----------------------------|------------|----------------------|--------------------------|-------|-------|
|        | Percent Response         |      | Percent Response       |        | Dose             | Green Signal | Actual Pct Green Cells | Normalized Pct Green Cells | Red Signal | Actual Pct Red Cells | Normalized Pct Red Cells |       |       |
|        | concentration            |      | concentration          |        | 0.1 uM           | 1 uM         | 10 uM                  | 0.1 uM                     | 1 uM       | 10 uM                | 0.1 uM                   | 1 uM  | 10 uM |
|        | 0.1 uM                   | 1 uM | 10 uM                  | 0.1 uM | 1 uM             | 10 uM        | 0.1 uM                 | 1 uM                       | 10 uM      | 0.1 uM               | 1 uM                     | 10 uM |       |
|        | 50                       | 100  | 35                     | 0      | 0.1 uM           | 83.33        | 0.80                   | 2.32                       | 66.93      | 0.01                 | -47.91                   |       |       |
|        |                          |      |                        |        | 1 uM             | 108.90       | 0.87                   | 82.51                      | 81.22      | 0.05                 | -32.42                   |       |       |
|        |                          |      |                        |        | 10 uM            | 96.99        | 0.80                   | 838.70                     | 84.11      | 0.06                 | -30.02                   |       |       |

Compound

Normalized Values (A and B Sets)

Responses

| AZ 3146 | Percent Green Cells (AB) |      | Percent Red Cells (AB) |        | Average Response |              |                        |                            |            |                      |                          |       |       |
|---------|--------------------------|------|------------------------|--------|------------------|--------------|------------------------|----------------------------|------------|----------------------|--------------------------|-------|-------|
|         | Percent Response         |      | Percent Response       |        | Dose             | Green Signal | Actual Pct Green Cells | Normalized Pct Green Cells | Red Signal | Actual Pct Red Cells | Normalized Pct Red Cells |       |       |
|         | concentration            |      | concentration          |        | 0.1 uM           | 1 uM         | 10 uM                  | 0.1 uM                     | 1 uM       | 10 uM                | 0.1 uM                   | 1 uM  | 10 uM |
|         | 0.1 uM                   | 1 uM | 10 uM                  | 0.1 uM | 1 uM             | 10 uM        | 0.1 uM                 | 1 uM                       | 10 uM      | 0.1 uM               | 1 uM                     | 10 uM |       |
|         | 100                      | 65   | 100                    | 0      | 0.1 uM           | 100.73       | 0.90                   | 106.47                     | 85.80      | 0.07                 | -19.94                   |       |       |
|         |                          |      |                        |        | 1 uM             | 104.30       | 0.91                   | 105.15                     | 82.44      | 0.04                 | -38.41                   |       |       |
|         |                          |      |                        |        | 10 uM            | 110.36       | 0.94                   | 261.31                     | 92.40      | 0.09                 | -16.19                   |       |       |

Compound

Normalized Values (A and B Sets)

Responses

| AZ191 | Percent Green Cells (AB) |     | Percent Red Cells (AB) |   | Average Response |              |                        |                            |            |                      |                          |      |
|-------|--------------------------|-----|------------------------|---|------------------|--------------|------------------------|----------------------------|------------|----------------------|--------------------------|------|
|       | Percent Response         |     | Percent Response       |   | Dose             | Green Signal | Actual Pct Green Cells | Normalized Pct Green Cells | Red Signal | Actual Pct Red Cells | Normalized Pct Red Cells |      |
|       | concentration            |     | concentration          |   | 0.1 uM           | 1 uM         | 10 uM                  | 0.1 uM                     | 1 uM       | 10 uM                | 0.1 uM                   | 1 uM |
|       | 100                      | 100 | 100                    | 0 | 0.1 uM           | 98.46        | 0.90                   | 112.23                     | 69.20      | 0.02                 | -65.60                   |      |
|       |                          |     |                        |   | 1 uM             | 68.97        | 0.55                   |                            | 60.69      | 0.01                 | -44.10                   |      |



Compound

Normalized Values (A and B Sets)

Responses

| Compound | Normalized Values (A and B Sets) |      | Responses                |                  |                        |                  |                        |                            |                      |                          |                  |                  |
|----------|----------------------------------|------|--------------------------|------------------|------------------------|------------------|------------------------|----------------------------|----------------------|--------------------------|------------------|------------------|
|          |                                  |      | Percent Green Cells (AB) |                  | Percent Red Cells (AB) |                  | Actual Pct Green Cells | Normalized Pct Green Cells | Actual Pct Red Cells | Normalized Pct Red Cells |                  |                  |
|          |                                  |      | 0.1 uM                   | 1 uM             | 10 uM                  | 0.1 uM           |                        |                            |                      |                          | 1 uM             | 10 uM            |
|          |                                  |      | Percent Response         | Percent Response | Percent Response       | Percent Response |                        |                            |                      |                          | Percent Response | Percent Response |
| 0.1 uM   | 92.69                            | 0.85 | 66.53                    | 69.16            | 0.01                   | -69.55           |                        |                            |                      |                          |                  |                  |
| 1 uM     | 106.98                           | 0.94 | 242.62                   | 75.11            | 0.10                   | 10.25            |                        |                            |                      |                          |                  |                  |
| 10 uM    | 83.14                            | 0.80 | -14.18                   | 64.46            | 0.02                   | -41.32           |                        |                            |                      |                          |                  |                  |

Compound

Normalized Values (A and B Sets)

Responses

| Compound | Normalized Values (A and B Sets) |      | Average Response         |                  |                        |                  |      |              |                        |                            |            |                      |                          |                  |                  |
|----------|----------------------------------|------|--------------------------|------------------|------------------------|------------------|------|--------------|------------------------|----------------------------|------------|----------------------|--------------------------|------------------|------------------|
|          |                                  |      | Percent Green Cells (AB) |                  | Percent Red Cells (AB) |                  | Dose | Green Signal | Actual Pct Green Cells | Normalized Pct Green Cells | Red Signal | Actual Pct Red Cells | Normalized Pct Red Cells |                  |                  |
|          |                                  |      | 0.1 uM                   | 1 uM             | 10 uM                  | 0.1 uM           |      |              |                        |                            |            |                      |                          | 1 uM             | 10 uM            |
|          |                                  |      | Percent Response         | Percent Response | Percent Response       | Percent Response |      |              |                        |                            |            |                      |                          | Percent Response | Percent Response |
| 0.1 uM   | 92.72                            | 0.82 | 6.62                     | 94.81            | 0.08                   | -15.13           |      |              |                        |                            |            |                      |                          |                  |                  |
| 1 uM     | 96.52                            | 0.89 | 91.59                    | 106.06           | 0.12                   | -2.08            |      |              |                        |                            |            |                      |                          |                  |                  |
| 10 uM    | 102.03                           | 0.95 | 455.92                   | 125.20           | 0.20                   | 37.79            |      |              |                        |                            |            |                      |                          |                  |                  |

Compound

Normalized Values (A and B Sets)

Responses

| Compound | Normalized Values (A and B Sets) |      | Average Response         |                  |                        |                  |      |              |                        |                            |            |                      |                          |                  |                  |
|----------|----------------------------------|------|--------------------------|------------------|------------------------|------------------|------|--------------|------------------------|----------------------------|------------|----------------------|--------------------------|------------------|------------------|
|          |                                  |      | Percent Green Cells (AB) |                  | Percent Red Cells (AB) |                  | Dose | Green Signal | Actual Pct Green Cells | Normalized Pct Green Cells | Red Signal | Actual Pct Red Cells | Normalized Pct Red Cells |                  |                  |
|          |                                  |      | 0.1 uM                   | 1 uM             | 10 uM                  | 0.1 uM           |      |              |                        |                            |            |                      |                          | 1 uM             | 10 uM            |
|          |                                  |      | Percent Response         | Percent Response | Percent Response       | Percent Response |      |              |                        |                            |            |                      |                          | Percent Response | Percent Response |
| 0.1 uM   | 92.32                            | 0.88 | 92.40                    | 75.10            | 0.03                   | -47.63           |      |              |                        |                            |            |                      |                          |                  |                  |
| 1 uM     | 96.76                            | 0.82 | 70.99                    | 106.05           | 0.16                   | 11.36            |      |              |                        |                            |            |                      |                          |                  |                  |
| 10 uM    | 90.87                            | 0.81 | 39.16                    | 100.71           | 0.10                   | -9.99            |      |              |                        |                            |            |                      |                          |                  |                  |

Compound

Normalized Values (A and B Sets)

Responses

| Compound | Normalized Values (A and B Sets) |      | Average Response         |                  |                        |                  |      |              |                        |                            |            |                      |                          |                  |                  |
|----------|----------------------------------|------|--------------------------|------------------|------------------------|------------------|------|--------------|------------------------|----------------------------|------------|----------------------|--------------------------|------------------|------------------|
|          |                                  |      | Percent Green Cells (AB) |                  | Percent Red Cells (AB) |                  | Dose | Green Signal | Actual Pct Green Cells | Normalized Pct Green Cells | Red Signal | Actual Pct Red Cells | Normalized Pct Red Cells |                  |                  |
|          |                                  |      | 0.1 uM                   | 1 uM             | 10 uM                  | 0.1 uM           |      |              |                        |                            |            |                      |                          | 1 uM             | 10 uM            |
|          |                                  |      | Percent Response         | Percent Response | Percent Response       | Percent Response |      |              |                        |                            |            |                      |                          | Percent Response | Percent Response |
| 0.1 uM   | 88.58                            | 0.80 | 18.52                    | 76.03            | 0.01                   | -66.87           |      |              |                        |                            |            |                      |                          |                  |                  |
| 1 uM     | 96.42                            | 0.82 | 32.30                    | 73.59            | 0.03                   | -36.33           |      |              |                        |                            |            |                      |                          |                  |                  |
| 10 uM    | 100.04                           | 0.87 | 54.68                    | 81.82            | 0.05                   | -26.98           |      |              |                        |                            |            |                      |                          |                  |                  |

Compound

Normalized Values (A and B Sets)

Responses

| Compound | Normalized Values (A and B Sets) |      | Average Response         |                  |                        |                  |      |              |                        |                            |            |                      |                          |                  |                  |
|----------|----------------------------------|------|--------------------------|------------------|------------------------|------------------|------|--------------|------------------------|----------------------------|------------|----------------------|--------------------------|------------------|------------------|
|          |                                  |      | Percent Green Cells (AB) |                  | Percent Red Cells (AB) |                  | Dose | Green Signal | Actual Pct Green Cells | Normalized Pct Green Cells | Red Signal | Actual Pct Red Cells | Normalized Pct Red Cells |                  |                  |
|          |                                  |      | 0.1 uM                   | 1 uM             | 10 uM                  | 0.1 uM           |      |              |                        |                            |            |                      |                          | 1 uM             | 10 uM            |
|          |                                  |      | Percent Response         | Percent Response | Percent Response       | Percent Response |      |              |                        |                            |            |                      |                          | Percent Response | Percent Response |
| 0.1 uM   | 99.67                            | 0.88 | 84.34                    | 75.72            | 0.04                   | -41.63           |      |              |                        |                            |            |                      |                          |                  |                  |
| 1 uM     | 81.17                            | 0.63 | -68.75                   | 94.41            | 0.09                   | -20.87           |      |              |                        |                            |            |                      |                          |                  |                  |
| 10 uM    | 98.10                            | 0.72 | -64.39                   | 90.29            | 0.13                   | 2.43             |      |              |                        |                            |            |                      |                          |                  |                  |

Compound

Normalized Values (A and B Sets)

Responses

| AZD3514 | Percent Green Cells (AB) |  | Percent Red Cells (AB) |  | Average Response |              |                        |                            |            |                      |                          |
|---------|--------------------------|--|------------------------|--|------------------|--------------|------------------------|----------------------------|------------|----------------------|--------------------------|
|         | Percent Response         |  | Percent Response       |  | Dose             | Green Signal | Actual Pct Green Cells | Normalized Pct Green Cells | Red Signal | Actual Pct Red Cells | Normalized Pct Red Cells |
|         | 100                      |  | 100                    |  | 0.1 uM           | 100.49       | 0.91                   | 210.26                     | 83.62      | 0.05                 | -40.37                   |
|         | 0                        |  | 0                      |  | 1 uM             | 95.78        | 0.81                   | 64.35                      | 105.30     | 0.13                 | -4.30                    |
|         | 0.1 uM                   |  | 0.1 uM                 |  | 10 uM            | 101.51       | 0.92                   | 160.85                     | 84.12      | 0.05                 | -37.76                   |
|         | 1 uM                     |  | 1 uM                   |  |                  |              |                        |                            |            |                      |                          |
|         | 10 uM                    |  | 10 uM                  |  |                  |              |                        |                            |            |                      |                          |

Compound

Normalized Values (A and B Sets)

Responses

| AZD4547 | Percent Green Cells (AB) |  | Percent Red Cells (AB) |  | Average Response |              |                        |                            |            |                      |                          |
|---------|--------------------------|--|------------------------|--|------------------|--------------|------------------------|----------------------------|------------|----------------------|--------------------------|
|         | Percent Response         |  | Percent Response       |  | Dose             | Green Signal | Actual Pct Green Cells | Normalized Pct Green Cells | Red Signal | Actual Pct Red Cells | Normalized Pct Red Cells |
|         | 100                      |  | 100                    |  | 0.1 uM           | 101.86       | 0.92                   | 121.26                     | 85.94      | 0.06                 | -27.44                   |
|         | 0                        |  | 0                      |  | 1 uM             | 96.45        | 0.84                   | 73.53                      | 87.18      | 0.06                 | -29.56                   |
|         | 0.1 uM                   |  | 0.1 uM                 |  | 10 uM            | 126.26       | 0.99                   | 582.46                     | 82.78      | 0.03                 | -45.40                   |
|         | 1 uM                     |  | 1 uM                   |  |                  |              |                        |                            |            |                      |                          |
|         | 10 uM                    |  | 10 uM                  |  |                  |              |                        |                            |            |                      |                          |

Compound

Normalized Values (A and B Sets)

Responses

| AZD5363 | Percent Green Cells (AB) |  | Percent Red Cells (AB) |  | Average Response |              |                        |                            |            |                      |                          |
|---------|--------------------------|--|------------------------|--|------------------|--------------|------------------------|----------------------------|------------|----------------------|--------------------------|
|         | Percent Response         |  | Percent Response       |  | Dose             | Green Signal | Actual Pct Green Cells | Normalized Pct Green Cells | Red Signal | Actual Pct Red Cells | Normalized Pct Red Cells |
|         | 100                      |  | 100                    |  | 0.1 uM           | 91.20        | 0.83                   | 49.16                      | 83.32      | 0.04                 | -46.87                   |
|         | 0                        |  | 0                      |  | 1 uM             | 79.57        | 0.74                   | 703.67                     | 70.92      | 0.01                 | -42.63                   |
|         | 0.1 uM                   |  | 0.1 uM                 |  | 10 uM            | 94.27        | 0.90                   | 89.68                      | 67.83      | 0.03                 | -37.05                   |
|         | 1 uM                     |  | 1 uM                   |  |                  |              |                        |                            |            |                      |                          |
|         | 10 uM                    |  | 10 uM                  |  |                  |              |                        |                            |            |                      |                          |

Compound

Normalized Values (A and B Sets)

Responses

| AZD5438 | Percent Green Cells (AB) |  | Percent Red Cells (AB) |  | Average Response |              |                        |                            |            |                      |                          |
|---------|--------------------------|--|------------------------|--|------------------|--------------|------------------------|----------------------------|------------|----------------------|--------------------------|
|         | Percent Response         |  | Percent Response       |  | Dose             | Green Signal | Actual Pct Green Cells | Normalized Pct Green Cells | Red Signal | Actual Pct Red Cells | Normalized Pct Red Cells |
|         | 100                      |  | 100                    |  | 0.1 uM           | 91.64        | 0.86                   | 65.07                      | 81.19      | 0.04                 | -34.86                   |
|         | 0                        |  | 0                      |  | 1 uM             | 94.62        | 0.78                   | 43.09                      | 81.29      | 0.05                 | -34.03                   |
|         | 0.1 uM                   |  | 0.1 uM                 |  | 10 uM            | 98.97        | 0.74                   | 803.96                     | 112.34     | 0.20                 | 35.54                    |
|         | 1 uM                     |  | 1 uM                   |  |                  |              |                        |                            |            |                      |                          |
|         | 10 uM                    |  | 10 uM                  |  |                  |              |                        |                            |            |                      |                          |

Compound

Normalized Values (A and B Sets)

Responses

| AZD6482 | Percent Green Cells (AB) |  | Percent Red Cells (AB) |  | Average Response |              |                        |                            |            |                      |                          |
|---------|--------------------------|--|------------------------|--|------------------|--------------|------------------------|----------------------------|------------|----------------------|--------------------------|
|         | Percent Response         |  | Percent Response       |  | Dose             | Green Signal | Actual Pct Green Cells | Normalized Pct Green Cells | Red Signal | Actual Pct Red Cells | Normalized Pct Red Cells |
|         | 100                      |  | 100                    |  | 0.1 uM           | 88.40        | 0.78                   | -12.61                     | 74.20      | 0.02                 | -65.98                   |
|         | 0                        |  | 0                      |  | 1 uM             | 93.78        | 0.85                   | 216.91                     | 84.48      | 0.05                 | -27.68                   |
|         | 0.1 uM                   |  | 0.1 uM                 |  |                  |              |                        |                            |            |                      |                          |
|         | 1 uM                     |  | 1 uM                   |  |                  |              |                        |                            |            |                      |                          |
|         | 10 uM                    |  | 10 uM                  |  |                  |              |                        |                            |            |                      |                          |

| Compound | Normalized Values (A and B Sets) | Responses |       |      |       |       |      |        |
|----------|----------------------------------|-----------|-------|------|-------|-------|------|--------|
|          |                                  | 10 uM     | 89.61 | 0.87 | 60.56 | 85.21 | 0.05 | -27.26 |

| Compound       | Normalized Values (A and B Sets) | Responses               |              |                        |                            |            |                      |                          |
|----------------|----------------------------------|-------------------------|--------------|------------------------|----------------------------|------------|----------------------|--------------------------|
| <b>AZD8055</b> |                                  | <b>Average Response</b> |              |                        |                            |            |                      |                          |
|                |                                  | Dose                    | Green Signal | Actual Pct Green Cells | Normalized Pct Green Cells | Red Signal | Actual Pct Red Cells | Normalized Pct Red Cells |
|                |                                  | 0.1 uM                  | 106.78       | 0.95                   | 148.13                     | 83.31      | 0.05                 | -45.83                   |
|                |                                  | 1 uM                    | 98.62        | 0.90                   | 86.79                      | 137.19     | 0.23                 | 49.08                    |
| 10 uM          | 115.39                           | 0.92                    | 131.83       | 126.57                 | 0.16                       | 17.53      |                      |                          |

| Compound       | Normalized Values (A and B Sets) | Responses               |              |                        |                            |            |                      |                          |
|----------------|----------------------------------|-------------------------|--------------|------------------------|----------------------------|------------|----------------------|--------------------------|
| <b>AZD8330</b> |                                  | <b>Average Response</b> |              |                        |                            |            |                      |                          |
|                |                                  | Dose                    | Green Signal | Actual Pct Green Cells | Normalized Pct Green Cells | Red Signal | Actual Pct Red Cells | Normalized Pct Red Cells |
|                |                                  | 0.1 uM                  | 96.34        | 0.90                   | 116.37                     | 80.27      | 0.05                 | -29.29                   |
|                |                                  | 1 uM                    | 113.47       | 0.93                   | 115.96                     | 97.81      | 0.11                 | -7.63                    |
| 10 uM          | 99.92                            | 0.94                    | 349.93       | 77.97                  | 0.05                       | -36.61     |                      |                          |

| Compound                   | Normalized Values (A and B Sets) | Responses               |              |                        |                            |            |                      |                          |
|----------------------------|----------------------------------|-------------------------|--------------|------------------------|----------------------------|------------|----------------------|--------------------------|
| <b>AZD8931 (Sapitinib)</b> |                                  | <b>Average Response</b> |              |                        |                            |            |                      |                          |
|                            |                                  | Dose                    | Green Signal | Actual Pct Green Cells | Normalized Pct Green Cells | Red Signal | Actual Pct Red Cells | Normalized Pct Red Cells |
|                            |                                  | 0.1 uM                  | 86.06        | 0.82                   | 18.14                      | 77.22      | 0.03                 | -42.19                   |
|                            |                                  | 1 uM                    | 90.50        | 0.76                   | 43.25                      | 87.23      | 0.06                 | -30.25                   |
| 10 uM                      | 92.13                            | 0.90                    | 204.55       | 89.13                  | 0.06                       | -30.01     |                      |                          |

| Compound           | Normalized Values (A and B Sets) | Responses               |              |                        |                            |            |                      |                          |
|--------------------|----------------------------------|-------------------------|--------------|------------------------|----------------------------|------------|----------------------|--------------------------|
| <b>Azelidipine</b> |                                  | <b>Average Response</b> |              |                        |                            |            |                      |                          |
|                    |                                  | Dose                    | Green Signal | Actual Pct Green Cells | Normalized Pct Green Cells | Red Signal | Actual Pct Red Cells | Normalized Pct Red Cells |
|                    |                                  | 0.1 uM                  | 101.09       | 0.90                   | 119.52                     | 85.47      | 0.07                 | -30.34                   |
|                    |                                  | 1 uM                    | 96.52        | 0.80                   | 55.42                      | 81.64      | 0.04                 | -44.44                   |
| 10 uM              | 99.34                            | 0.89                    | 91.46        | 92.54                  | 0.07                       | -24.68     |                      |                          |

| Compound          | Normalized Values (A and B Sets) | Responses               |              |                        |                            |            |                      |
|-------------------|----------------------------------|-------------------------|--------------|------------------------|----------------------------|------------|----------------------|
| <b>Azilsartan</b> |                                  | <b>Average Response</b> |              |                        |                            |            |                      |
|                   |                                  | Dose                    | Green Signal | Actual Pct Green Cells | Normalized Pct Green Cells | Red Signal | Actual Pct Red Cells |

Compound

Normalized Values (A and B Sets)

Responses

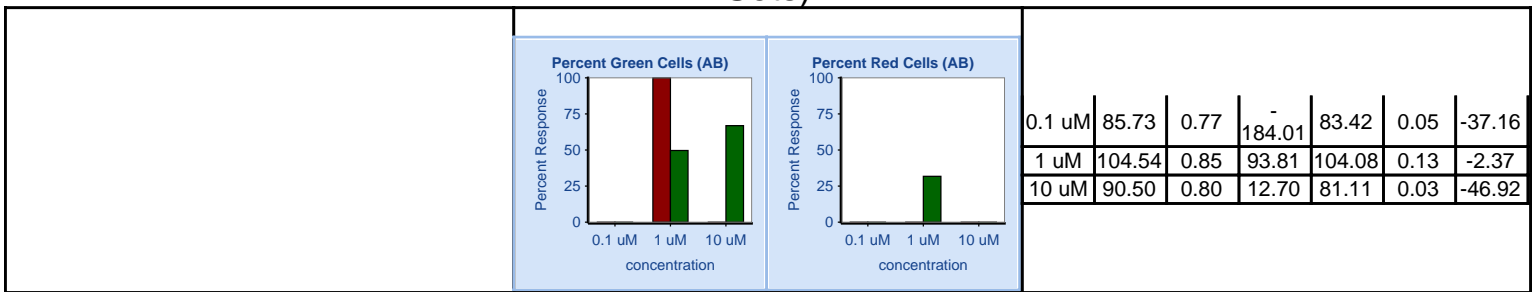

Compound

Normalized Values (A and B Sets)

Responses

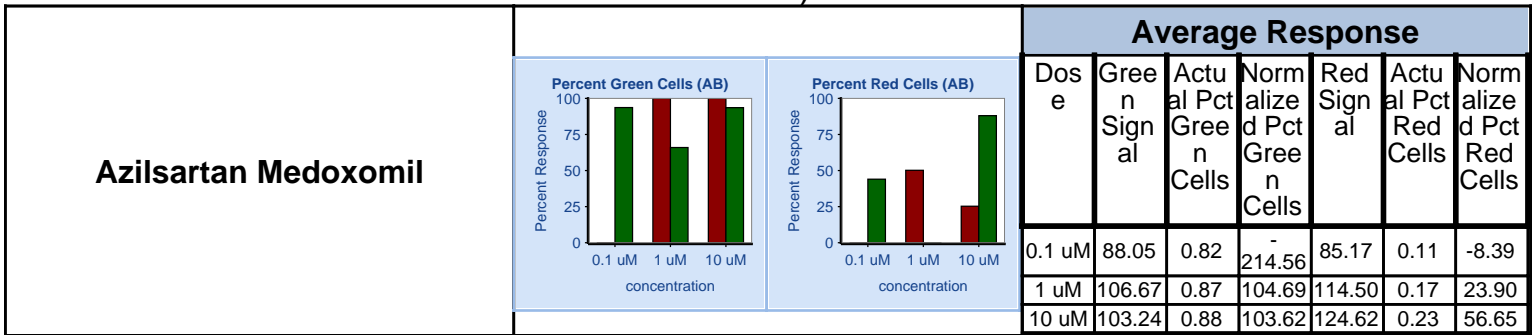

Compound

Normalized Values (A and B Sets)

Responses

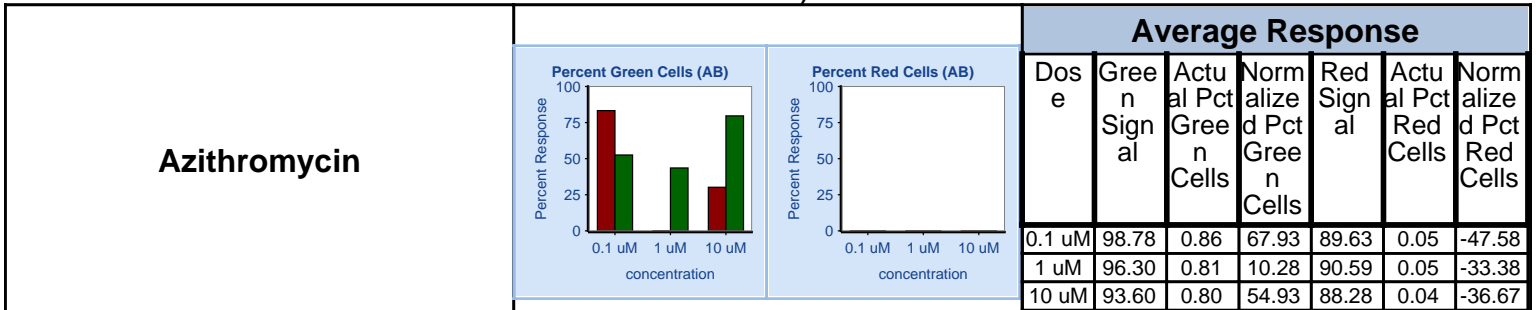

Compound

Normalized Values (A and B Sets)

Responses

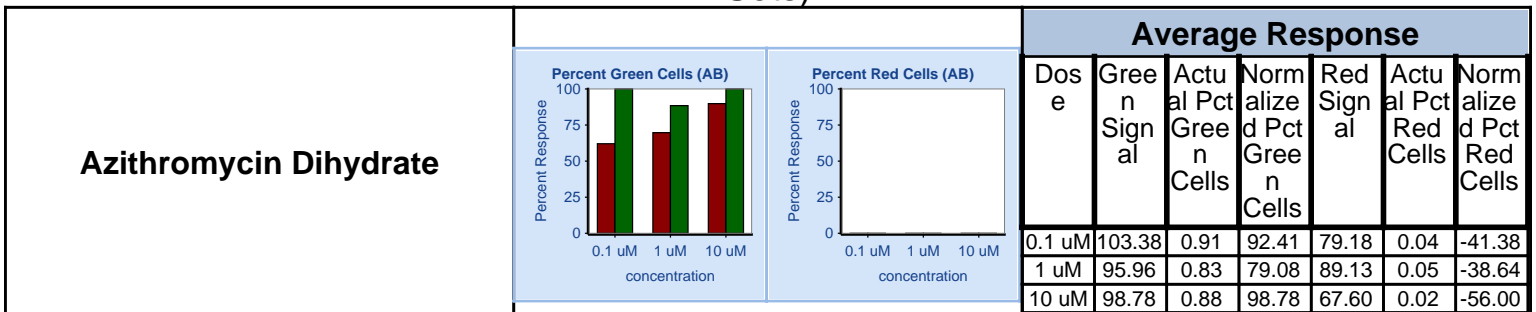

Compound

Normalized Values (A and B Sets)

Responses

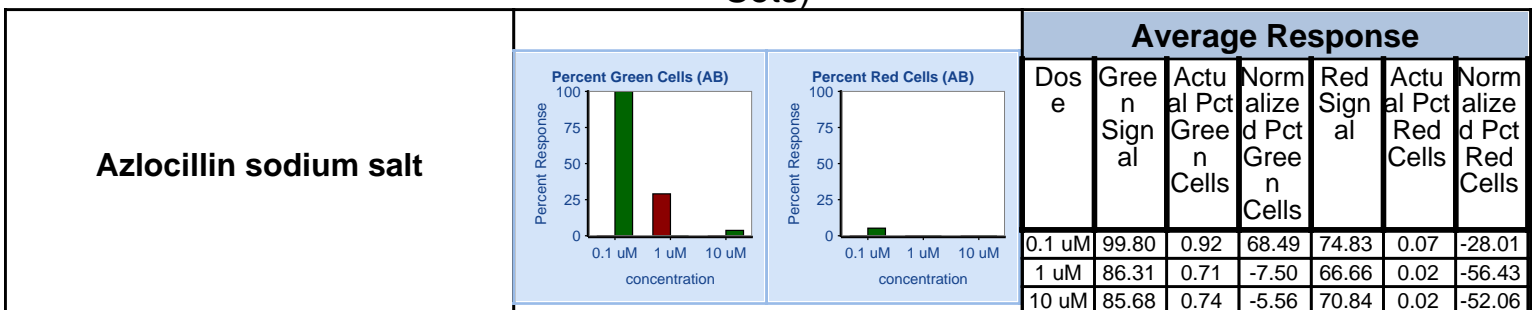

Compound

Normalized Values (A and B Sets)

Responses

| Azomycin |       |      | Average Response |              |                        |                            |            |                      |                          |
|----------|-------|------|------------------|--------------|------------------------|----------------------------|------------|----------------------|--------------------------|
|          |       |      | Dose             | Green Signal | Actual Pct Green Cells | Normalized Pct Green Cells | Red Signal | Actual Pct Red Cells | Normalized Pct Red Cells |
|          |       |      | 0.1 uM           | 87.28        | 0.84                   | 38.42                      | 84.75      | 0.04                 | -35.83                   |
|          |       |      | 1 uM             | 96.39        | 0.84                   | 65.78                      | 99.45      | 0.10                 | -12.60                   |
| 10 uM    | 95.13 | 0.87 | 177.13           | 75.36        | 0.02                   | -48.07                     |            |                      |                          |

Compound

Normalized Values (A and B Sets)

Responses

| Bacitracin |       |      | Average Response |              |                        |                            |            |                      |                          |
|------------|-------|------|------------------|--------------|------------------------|----------------------------|------------|----------------------|--------------------------|
|            |       |      | Dose             | Green Signal | Actual Pct Green Cells | Normalized Pct Green Cells | Red Signal | Actual Pct Red Cells | Normalized Pct Red Cells |
|            |       |      | 0.1 uM           | 96.89        | 0.87                   | 123.78                     | 108.43     | 0.16                 | 14.28                    |
|            |       |      | 1 uM             | 109.01       | 0.90                   | 134.27                     | 105.08     | 0.13                 | -0.40                    |
| 10 uM      | 94.67 | 0.76 | 2.09             | 83.56        | 0.05                   | -35.36                     |            |                      |                          |

Compound

Normalized Values (A and B Sets)

Responses

| Bafetinib (INNO-406) |       |      | Average Response |              |                        |                            |            |                      |                          |
|----------------------|-------|------|------------------|--------------|------------------------|----------------------------|------------|----------------------|--------------------------|
|                      |       |      | Dose             | Green Signal | Actual Pct Green Cells | Normalized Pct Green Cells | Red Signal | Actual Pct Red Cells | Normalized Pct Red Cells |
|                      |       |      | 0.1 uM           | 87.37        | 0.80                   | 8.98                       | 88.45      | 0.06                 | -42.97                   |
|                      |       |      | 1 uM             | 89.54        | 0.80                   | 35.14                      | 84.08      | 0.05                 | -34.87                   |
| 10 uM                | 99.35 | 0.92 | 126.62           | 123.41       | 0.08                   | -18.14                     |            |                      |                          |

Compound

Normalized Values (A and B Sets)

Responses

| Baicalin |        |      | Average Response |              |                        |                            |            |                      |                          |
|----------|--------|------|------------------|--------------|------------------------|----------------------------|------------|----------------------|--------------------------|
|          |        |      | Dose             | Green Signal | Actual Pct Green Cells | Normalized Pct Green Cells | Red Signal | Actual Pct Red Cells | Normalized Pct Red Cells |
|          |        |      | 0.1 uM           | 97.31        | 0.89                   | 94.81                      | 93.28      | 0.09                 | -15.38                   |
|          |        |      | 1 uM             | 103.95       | 0.87                   | 83.84                      | 80.66      | 0.04                 | -38.91                   |
| 10 uM    | 110.07 | 0.95 | 330.42           | 90.39        | 0.06                   | -30.97                     |            |                      |                          |

Compound

Normalized Values (A and B Sets)

Responses

| Balofloxacin |        |      | Average Response |              |                        |                            |            |                      |                          |
|--------------|--------|------|------------------|--------------|------------------------|----------------------------|------------|----------------------|--------------------------|
|              |        |      | Dose             | Green Signal | Actual Pct Green Cells | Normalized Pct Green Cells | Red Signal | Actual Pct Red Cells | Normalized Pct Red Cells |
|              |        |      | 0.1 uM           | 107.38       | 0.91                   | 116.62                     | 94.73      | 0.05                 | -45.47                   |
|              |        |      | 1 uM             | 105.31       | 0.88                   | 92.01                      | 90.68      | 0.04                 | -36.87                   |
| 10 uM        | 100.03 | 0.84 | 78.97            | 119.58       | 0.12                   | -3.38                      |            |                      |                          |



Compound

Normalized Values (A and B Sets)

Responses

| BAM7 | Percent Green Cells (AB) |  | Percent Red Cells (AB) |  | Average Response |              |                        |                            |            |                      |                          |
|------|--------------------------|--|------------------------|--|------------------|--------------|------------------------|----------------------------|------------|----------------------|--------------------------|
|      | Percent Response         |  | Percent Response       |  | Dose             | Green Signal | Actual Pct Green Cells | Normalized Pct Green Cells | Red Signal | Actual Pct Red Cells | Normalized Pct Red Cells |
|      | 100                      |  | 100                    |  | 0.1 uM           | 103.77       | 0.92                   | 227.70                     | 81.65      | 0.06                 | -31.81                   |
|      | 0                        |  | 0                      |  | 1 uM             | 94.11        | 0.81                   | 66.78                      | 77.07      | 0.02                 | -57.75                   |
|      | 0.1 uM                   |  | 0.1 uM                 |  | 10 uM            | 94.25        | 0.84                   | 74.49                      | 90.35      | 0.06                 | -31.25                   |
|      | 1 uM                     |  | 1 uM                   |  |                  |              |                        |                            |            |                      |                          |
|      | 10 uM                    |  | 10 uM                  |  |                  |              |                        |                            |            |                      |                          |

Compound

Normalized Values (A and B Sets)

Responses

| Banoxantrone dihydrochloride | Percent Green Cells (AB) |  | Percent Red Cells (AB) |  | Average Response |              |                        |                            |            |                      |                          |
|------------------------------|--------------------------|--|------------------------|--|------------------|--------------|------------------------|----------------------------|------------|----------------------|--------------------------|
|                              | Percent Response         |  | Percent Response       |  | Dose             | Green Signal | Actual Pct Green Cells | Normalized Pct Green Cells | Red Signal | Actual Pct Red Cells | Normalized Pct Red Cells |
|                              | 100                      |  | 100                    |  | 0.1 uM           | 95.47        | 0.88                   | 90.51                      | 75.29      | 0.03                 | -55.23                   |
|                              | 0                        |  | 0                      |  | 1 uM             | 99.13        | 0.90                   | -21.66                     | 72.01      | 0.03                 | -36.03                   |
|                              | 0.1 uM                   |  | 0.1 uM                 |  | 10 uM            | 101.18       | 0.88                   | 63.07                      | 92.34      | 0.11                 | -1.59                    |
|                              | 1 uM                     |  | 1 uM                   |  |                  |              |                        |                            |            |                      |                          |
|                              | 10 uM                    |  | 10 uM                  |  |                  |              |                        |                            |            |                      |                          |

Compound

Normalized Values (A and B Sets)

Responses

| Barasertib (AZD1152-HQPA) | Percent Green Cells (AB) |  | Percent Red Cells (AB) |  | Average Response |              |                        |                            |            |                      |                          |
|---------------------------|--------------------------|--|------------------------|--|------------------|--------------|------------------------|----------------------------|------------|----------------------|--------------------------|
|                           | Percent Response         |  | Percent Response       |  | Dose             | Green Signal | Actual Pct Green Cells | Normalized Pct Green Cells | Red Signal | Actual Pct Red Cells | Normalized Pct Red Cells |
|                           | 100                      |  | 100                    |  | 0.1 uM           | 93.46        | 0.86                   | 68.75                      | 100.74     | 0.10                 | -27.22                   |
|                           | 0                        |  | 0                      |  | 1 uM             | 100.03       | 0.84                   | -1.59                      | 129.19     | 0.20                 | 32.09                    |
|                           | 0.1 uM                   |  | 0.1 uM                 |  | 10 uM            | 97.86        | 0.82                   | 60.28                      | 109.34     | 0.12                 | 0.74                     |
|                           | 1 uM                     |  | 1 uM                   |  |                  |              |                        |                            |            |                      |                          |
|                           | 10 uM                    |  | 10 uM                  |  |                  |              |                        |                            |            |                      |                          |

Compound

Normalized Values (A and B Sets)

Responses

| Bardoxolone Methyl | Percent Green Cells (AB) |  | Percent Red Cells (AB) |  | Average Response |              |                        |                            |            |                      |                          |
|--------------------|--------------------------|--|------------------------|--|------------------|--------------|------------------------|----------------------------|------------|----------------------|--------------------------|
|                    | Percent Response         |  | Percent Response       |  | Dose             | Green Signal | Actual Pct Green Cells | Normalized Pct Green Cells | Red Signal | Actual Pct Red Cells | Normalized Pct Red Cells |
|                    | 100                      |  | 100                    |  | 0.1 uM           | 86.11        | 0.78                   | 2.67                       | 78.03      | 0.02                 | -60.76                   |
|                    | 0                        |  | 0                      |  | 1 uM             | 104.47       | 0.95                   | 313.29                     | 91.54      | 0.09                 | -3.13                    |
|                    | 0.1 uM                   |  | 0.1 uM                 |  | 10 uM            | 86.30        | 0.69                   | 117.16                     | 85.38      | 0.06                 | -22.73                   |
|                    | 1 uM                     |  | 1 uM                   |  |                  |              |                        |                            |            |                      |                          |
|                    | 10 uM                    |  | 10 uM                  |  |                  |              |                        |                            |            |                      |                          |

Compound

Normalized Values (A and B Sets)

Responses

| Batimastat (BB-94) | Percent Green Cells (AB) |  | Percent Red Cells (AB) |  | Average Response |              |                        |                            |            |                      |                          |
|--------------------|--------------------------|--|------------------------|--|------------------|--------------|------------------------|----------------------------|------------|----------------------|--------------------------|
|                    | Percent Response         |  | Percent Response       |  | Dose             | Green Signal | Actual Pct Green Cells | Normalized Pct Green Cells | Red Signal | Actual Pct Red Cells | Normalized Pct Red Cells |
|                    | 100                      |  | 100                    |  | 0.1 uM           | 89.58        | 0.86                   | 75.39                      | 102.11     | 0.12                 | -1.74                    |
|                    | 0                        |  | 0                      |  | 1 uM             | 97.90        | 0.83                   | 78.80                      | 88.95      | 0.09                 | -21.52                   |
|                    | 0.1 uM                   |  | 0.1 uM                 |  | 10 uM            | 92.20        | 0.76                   | 68.49                      | 113.54     | 0.16                 | 20.32                    |
|                    | 1 uM                     |  | 1 uM                   |  |                  |              |                        |                            |            |                      |                          |
|                    | 10 uM                    |  | 10 uM                  |  |                  |              |                        |                            |            |                      |                          |



Compound

Normalized Values (A and B Sets)

Responses

| Bay 11-7085 | Percent Green Cells (AB) |      | Percent Red Cells (AB) |        | Average Response |              |                        |                            |            |                      |                          |       |       |
|-------------|--------------------------|------|------------------------|--------|------------------|--------------|------------------------|----------------------------|------------|----------------------|--------------------------|-------|-------|
|             | Percent Response         |      | Percent Response       |        | Dose             | Green Signal | Actual Pct Green Cells | Normalized Pct Green Cells | Red Signal | Actual Pct Red Cells | Normalized Pct Red Cells |       |       |
|             | concentration            |      | concentration          |        | 0.1 uM           | 1 uM         | 10 uM                  | 0.1 uM                     | 1 uM       | 10 uM                | 0.1 uM                   | 1 uM  | 10 uM |
|             | 0.1 uM                   | 1 uM | 10 uM                  | 0.1 uM | 1 uM             | 10 uM        | 0.1 uM                 | 1 uM                       | 10 uM      | 0.1 uM               | 1 uM                     | 10 uM |       |
|             | 75                       | 25   | 100                    | 100    | 0.1 uM           | 93.63        | 0.83                   | 51.77                      | 97.47      | 0.09                 | -21.47                   |       |       |
|             |                          |      |                        |        | 1 uM             | 81.69        | 0.74                   | 618.21                     | 91.13      | 0.09                 | -10.38                   |       |       |
|             |                          |      |                        |        | 10 uM            | 106.91       | 0.93                   | 108.79                     | 81.95      | 0.07                 | -20.38                   |       |       |

Compound

Normalized Values (A and B Sets)

Responses

| Bazedoxifene HCl | Percent Green Cells (AB) |      | Percent Red Cells (AB) |        | Average Response |              |                        |                            |            |                      |                          |       |       |
|------------------|--------------------------|------|------------------------|--------|------------------|--------------|------------------------|----------------------------|------------|----------------------|--------------------------|-------|-------|
|                  | Percent Response         |      | Percent Response       |        | Dose             | Green Signal | Actual Pct Green Cells | Normalized Pct Green Cells | Red Signal | Actual Pct Red Cells | Normalized Pct Red Cells |       |       |
|                  | concentration            |      | concentration          |        | 0.1 uM           | 1 uM         | 10 uM                  | 0.1 uM                     | 1 uM       | 10 uM                | 0.1 uM                   | 1 uM  | 10 uM |
|                  | 0.1 uM                   | 1 uM | 10 uM                  | 0.1 uM | 1 uM             | 10 uM        | 0.1 uM                 | 1 uM                       | 10 uM      | 0.1 uM               | 1 uM                     | 10 uM |       |
|                  | 95                       | 85   | 100                    | 100    | 0.1 uM           | 99.46        | 0.89                   | 101.87                     | 96.88      | 0.10                 | -15.17                   |       |       |
|                  |                          |      |                        |        | 1 uM             | 97.20        | 0.85                   | 232.24                     | 98.32      | 0.11                 | 0.87                     |       |       |
|                  |                          |      |                        |        | 10 uM            | 105.73       | 0.96                   | 143.09                     | 62.85      | 0.01                 | -45.95                   |       |       |

Compound

Normalized Values (A and B Sets)

Responses

| BD 1047 | Percent Green Cells (AB) |      | Percent Red Cells (AB) |        | Average Response |              |                        |                            |            |                      |                          |       |       |
|---------|--------------------------|------|------------------------|--------|------------------|--------------|------------------------|----------------------------|------------|----------------------|--------------------------|-------|-------|
|         | Percent Response         |      | Percent Response       |        | Dose             | Green Signal | Actual Pct Green Cells | Normalized Pct Green Cells | Red Signal | Actual Pct Red Cells | Normalized Pct Red Cells |       |       |
|         | concentration            |      | concentration          |        | 0.1 uM           | 1 uM         | 10 uM                  | 0.1 uM                     | 1 uM       | 10 uM                | 0.1 uM                   | 1 uM  | 10 uM |
|         | 0.1 uM                   | 1 uM | 10 uM                  | 0.1 uM | 1 uM             | 10 uM        | 0.1 uM                 | 1 uM                       | 10 uM      | 0.1 uM               | 1 uM                     | 10 uM |       |
|         | 70                       | 100  | 100                    | 60     | 0.1 uM           | 97.66        | 0.88                   | 91.03                      | 99.62      | 0.10                 | -10.10                   |       |       |
|         |                          |      |                        |        | 1 uM             | 105.57       | 0.92                   | -35.70                     | 84.76      | 0.07                 | -14.10                   |       |       |
|         |                          |      |                        |        | 10 uM            | 73.23        | 0.63                   | 157.92                     | 88.19      | 0.10                 | -6.28                    |       |       |

Compound

Normalized Values (A and B Sets)

Responses

| Bekanamycin | Percent Green Cells (AB) |      | Percent Red Cells (AB) |        | Average Response |              |                        |                            |            |                      |                          |       |       |
|-------------|--------------------------|------|------------------------|--------|------------------|--------------|------------------------|----------------------------|------------|----------------------|--------------------------|-------|-------|
|             | Percent Response         |      | Percent Response       |        | Dose             | Green Signal | Actual Pct Green Cells | Normalized Pct Green Cells | Red Signal | Actual Pct Red Cells | Normalized Pct Red Cells |       |       |
|             | concentration            |      | concentration          |        | 0.1 uM           | 1 uM         | 10 uM                  | 0.1 uM                     | 1 uM       | 10 uM                | 0.1 uM                   | 1 uM  | 10 uM |
|             | 0.1 uM                   | 1 uM | 10 uM                  | 0.1 uM | 1 uM             | 10 uM        | 0.1 uM                 | 1 uM                       | 10 uM      | 0.1 uM               | 1 uM                     | 10 uM |       |
|             | 100                      | 100  | 75                     | 80     | 0.1 uM           | 93.88        | 0.87                   | -68.03                     | 90.69      | 0.10                 | -14.84                   |       |       |
|             |                          |      |                        |        | 1 uM             | 85.40        | 0.67                   | -48.71                     | 76.44      | 0.07                 | -33.44                   |       |       |
|             |                          |      |                        |        | 10 uM            | 101.54       | 0.85                   | 74.02                      | 99.47      | 0.14                 | 10.93                    |       |       |

Compound

Normalized Values (A and B Sets)

Responses

| Belinostat (PXD101) | Percent Green Cells (AB) |      | Percent Red Cells (AB) |        | Average Response |              |                        |                            |            |                      |                          |       |       |
|---------------------|--------------------------|------|------------------------|--------|------------------|--------------|------------------------|----------------------------|------------|----------------------|--------------------------|-------|-------|
|                     | Percent Response         |      | Percent Response       |        | Dose             | Green Signal | Actual Pct Green Cells | Normalized Pct Green Cells | Red Signal | Actual Pct Red Cells | Normalized Pct Red Cells |       |       |
|                     | concentration            |      | concentration          |        | 0.1 uM           | 1 uM         | 10 uM                  | 0.1 uM                     | 1 uM       | 10 uM                | 0.1 uM                   | 1 uM  | 10 uM |
|                     | 0.1 uM                   | 1 uM | 10 uM                  | 0.1 uM | 1 uM             | 10 uM        | 0.1 uM                 | 1 uM                       | 10 uM      | 0.1 uM               | 1 uM                     | 10 uM |       |
|                     | 30                       | 100  | 30                     | 100    | 0.1 uM           | 90.43        | 0.79                   | -11.87                     | 90.74      | 0.05                 | -46.60                   |       |       |
|                     |                          |      |                        |        | 1 uM             | 104.37       | 0.84                   | 64.49                      | 146.84     | 0.21                 | 38.63                    |       |       |
|                     |                          |      |                        |        | 10 uM            | 95.37        | 0.77                   | 36.95                      | 93.83      | 0.03                 | -41.96                   |       |       |

Compound

Normalized Values (A and B Sets)

Responses

| Benfotiamine | Percent Green Cells (AB) |  | Percent Red Cells (AB)  |  | Average Response |              |                        |                            |            |                      |                          |
|--------------|--------------------------|--|-------------------------|--|------------------|--------------|------------------------|----------------------------|------------|----------------------|--------------------------|
|              | 100<br>Percent Response  |  | 100<br>Percent Response |  | Dose             | Green Signal | Actual Pct Green Cells | Normalized Pct Green Cells | Red Signal | Actual Pct Red Cells | Normalized Pct Red Cells |
|              | 0.1 uM 1 uM 10 uM        |  | 0.1 uM 1 uM 10 uM       |  | 0.1 uM           | 105.79       | 0.91                   | 12.74                      | 123.31     | 0.24                 | 60.58                    |
|              | concentration            |  | concentration           |  | 1 uM             | 89.79        | 0.72                   | -8.48                      | 84.11      | 0.06                 | -35.15                   |
|              |                          |  |                         |  | 10 uM            | 98.70        | 0.86                   | 55.36                      | 92.01      | 0.07                 | -23.79                   |

Compound

Normalized Values (A and B Sets)

Responses

| Benidipine HCl | Percent Green Cells (AB) |  | Percent Red Cells (AB)  |  | Average Response |              |                        |                            |            |                      |                          |
|----------------|--------------------------|--|-------------------------|--|------------------|--------------|------------------------|----------------------------|------------|----------------------|--------------------------|
|                | 100<br>Percent Response  |  | 100<br>Percent Response |  | Dose             | Green Signal | Actual Pct Green Cells | Normalized Pct Green Cells | Red Signal | Actual Pct Red Cells | Normalized Pct Red Cells |
|                | 0.1 uM 1 uM 10 uM        |  | 0.1 uM 1 uM 10 uM       |  | 0.1 uM           | 96.69        | 0.87                   | 76.18                      | 91.48      | 0.05                 | -46.19                   |
|                | concentration            |  | concentration           |  | 1 uM             | 93.29        | 0.80                   | -2.97                      | 90.69      | 0.04                 | -37.19                   |
|                |                          |  |                         |  | 10 uM            | 110.88       | 0.92                   | 125.31                     | 124.71     | 0.14                 | 1.15                     |

Compound

Normalized Values (A and B Sets)

Responses

| Bentiromide | Percent Green Cells (AB) |  | Percent Red Cells (AB)  |  | Average Response |              |                        |                            |            |                      |                          |
|-------------|--------------------------|--|-------------------------|--|------------------|--------------|------------------------|----------------------------|------------|----------------------|--------------------------|
|             | 100<br>Percent Response  |  | 100<br>Percent Response |  | Dose             | Green Signal | Actual Pct Green Cells | Normalized Pct Green Cells | Red Signal | Actual Pct Red Cells | Normalized Pct Red Cells |
|             | 0.1 uM 1 uM 10 uM        |  | 0.1 uM 1 uM 10 uM       |  | 0.1 uM           | 108.98       | 0.94                   | 144.28                     | 99.97      | 0.14                 | 9.55                     |
|             | concentration            |  | concentration           |  | 1 uM             | 94.95        | 0.78                   | 44.42                      | 73.67      | 0.03                 | -54.23                   |
|             |                          |  |                         |  | 10 uM            | 104.36       | 0.86                   | 88.02                      | 110.22     | 0.16                 | 18.04                    |

Compound

Normalized Values (A and B Sets)

Responses

| Bepotastine Besilate | Percent Green Cells (AB) |  | Percent Red Cells (AB)  |  | Average Response |              |                        |                            |            |                      |                          |
|----------------------|--------------------------|--|-------------------------|--|------------------|--------------|------------------------|----------------------------|------------|----------------------|--------------------------|
|                      | 100<br>Percent Response  |  | 100<br>Percent Response |  | Dose             | Green Signal | Actual Pct Green Cells | Normalized Pct Green Cells | Red Signal | Actual Pct Red Cells | Normalized Pct Red Cells |
|                      | 0.1 uM 1 uM 10 uM        |  | 0.1 uM 1 uM 10 uM       |  | 0.1 uM           | 88.14        | 0.84                   | 11.88                      | 64.59      | 0.01                 | -58.92                   |
|                      | concentration            |  | concentration           |  | 1 uM             | 95.36        | 0.79                   | 51.98                      | 85.87      | 0.06                 | -38.35                   |
|                      |                          |  |                         |  | 10 uM            | 91.45        | 0.80                   | 9.45                       | 89.95      | 0.06                 | -30.57                   |

Compound

Normalized Values (A and B Sets)

Responses

| Bergenin | Percent Green Cells (AB) |  | Percent Red Cells (AB)  |  | Average Response |              |                        |                            |            |                      |                          |
|----------|--------------------------|--|-------------------------|--|------------------|--------------|------------------------|----------------------------|------------|----------------------|--------------------------|
|          | 100<br>Percent Response  |  | 100<br>Percent Response |  | Dose             | Green Signal | Actual Pct Green Cells | Normalized Pct Green Cells | Red Signal | Actual Pct Red Cells | Normalized Pct Red Cells |
|          | 0.1 uM 1 uM 10 uM        |  | 0.1 uM 1 uM 10 uM       |  | 0.1 uM           | 114.69       | 0.94                   | 153.27                     | 85.48      | 0.05                 | -29.89                   |
|          | concentration            |  | concentration           |  | 1 uM             | 96.42        | 0.83                   | 63.68                      | 85.01      | 0.05                 | -34.20                   |
|          |                          |  |                         |  | 10 uM            | 103.68       | 0.91                   | 135.50                     | 99.27      | 0.12                 | -3.48                    |

| Compound                          | Normalized Values (A and B Sets) | Responses                                                                                                                                                                                                                                                                                                                                                                                                                                                                                                                                                                                                                                                                        |                  |                        |                            |            |                      |                          |  |      |              |                        |                            |            |                      |                          |        |       |      |        |       |      |        |      |       |      |        |       |      |        |       |       |      |       |       |      |        |
|-----------------------------------|----------------------------------|----------------------------------------------------------------------------------------------------------------------------------------------------------------------------------------------------------------------------------------------------------------------------------------------------------------------------------------------------------------------------------------------------------------------------------------------------------------------------------------------------------------------------------------------------------------------------------------------------------------------------------------------------------------------------------|------------------|------------------------|----------------------------|------------|----------------------|--------------------------|--|------|--------------|------------------------|----------------------------|------------|----------------------|--------------------------|--------|-------|------|--------|-------|------|--------|------|-------|------|--------|-------|------|--------|-------|-------|------|-------|-------|------|--------|
| <b>Betamethasone Dipropionate</b> |                                  | <table border="1"> <thead> <tr> <th colspan="7">Average Response</th> </tr> <tr> <th>Dose</th> <th>Green Signal</th> <th>Actual Pct Green Cells</th> <th>Normalized Pct Green Cells</th> <th>Red Signal</th> <th>Actual Pct Red Cells</th> <th>Normalized Pct Red Cells</th> </tr> </thead> <tbody> <tr> <td>0.1 uM</td> <td>63.37</td> <td>0.43</td> <td>312.51</td> <td>66.46</td> <td>0.01</td> <td>-67.93</td> </tr> <tr> <td>1 uM</td> <td>88.88</td> <td>0.85</td> <td>-26.36</td> <td>74.56</td> <td>0.02</td> <td>-37.51</td> </tr> <tr> <td>10 uM</td> <td>99.22</td> <td>0.92</td> <td>98.44</td> <td>67.74</td> <td>0.02</td> <td>-40.76</td> </tr> </tbody> </table> | Average Response |                        |                            |            |                      |                          |  | Dose | Green Signal | Actual Pct Green Cells | Normalized Pct Green Cells | Red Signal | Actual Pct Red Cells | Normalized Pct Red Cells | 0.1 uM | 63.37 | 0.43 | 312.51 | 66.46 | 0.01 | -67.93 | 1 uM | 88.88 | 0.85 | -26.36 | 74.56 | 0.02 | -37.51 | 10 uM | 99.22 | 0.92 | 98.44 | 67.74 | 0.02 | -40.76 |
|                                   |                                  | Average Response                                                                                                                                                                                                                                                                                                                                                                                                                                                                                                                                                                                                                                                                 |                  |                        |                            |            |                      |                          |  |      |              |                        |                            |            |                      |                          |        |       |      |        |       |      |        |      |       |      |        |       |      |        |       |       |      |       |       |      |        |
|                                   |                                  | Dose                                                                                                                                                                                                                                                                                                                                                                                                                                                                                                                                                                                                                                                                             | Green Signal     | Actual Pct Green Cells | Normalized Pct Green Cells | Red Signal | Actual Pct Red Cells | Normalized Pct Red Cells |  |      |              |                        |                            |            |                      |                          |        |       |      |        |       |      |        |      |       |      |        |       |      |        |       |       |      |       |       |      |        |
|                                   |                                  | 0.1 uM                                                                                                                                                                                                                                                                                                                                                                                                                                                                                                                                                                                                                                                                           | 63.37            | 0.43                   | 312.51                     | 66.46      | 0.01                 | -67.93                   |  |      |              |                        |                            |            |                      |                          |        |       |      |        |       |      |        |      |       |      |        |       |      |        |       |       |      |       |       |      |        |
| 1 uM                              | 88.88                            | 0.85                                                                                                                                                                                                                                                                                                                                                                                                                                                                                                                                                                                                                                                                             | -26.36           | 74.56                  | 0.02                       | -37.51     |                      |                          |  |      |              |                        |                            |            |                      |                          |        |       |      |        |       |      |        |      |       |      |        |       |      |        |       |       |      |       |       |      |        |
| 10 uM                             | 99.22                            | 0.92                                                                                                                                                                                                                                                                                                                                                                                                                                                                                                                                                                                                                                                                             | 98.44            | 67.74                  | 0.02                       | -40.76     |                      |                          |  |      |              |                        |                            |            |                      |                          |        |       |      |        |       |      |        |      |       |      |        |       |      |        |       |       |      |       |       |      |        |

| Compound                      | Normalized Values (A and B Sets) | Responses                                                                                                                                                                                                                                                                                                                                                                                                                                                                                                                                                                                                                                                                        |                  |                        |                            |            |                      |                          |  |      |              |                        |                            |            |                      |                          |        |        |      |       |       |      |        |      |       |      |        |       |      |        |       |       |      |       |       |      |        |
|-------------------------------|----------------------------------|----------------------------------------------------------------------------------------------------------------------------------------------------------------------------------------------------------------------------------------------------------------------------------------------------------------------------------------------------------------------------------------------------------------------------------------------------------------------------------------------------------------------------------------------------------------------------------------------------------------------------------------------------------------------------------|------------------|------------------------|----------------------------|------------|----------------------|--------------------------|--|------|--------------|------------------------|----------------------------|------------|----------------------|--------------------------|--------|--------|------|-------|-------|------|--------|------|-------|------|--------|-------|------|--------|-------|-------|------|-------|-------|------|--------|
| <b>Betamethasone Valerate</b> |                                  | <table border="1"> <thead> <tr> <th colspan="7">Average Response</th> </tr> <tr> <th>Dose</th> <th>Green Signal</th> <th>Actual Pct Green Cells</th> <th>Normalized Pct Green Cells</th> <th>Red Signal</th> <th>Actual Pct Red Cells</th> <th>Normalized Pct Red Cells</th> </tr> </thead> <tbody> <tr> <td>0.1 uM</td> <td>107.07</td> <td>0.88</td> <td>86.18</td> <td>75.72</td> <td>0.03</td> <td>-55.07</td> </tr> <tr> <td>1 uM</td> <td>81.30</td> <td>0.76</td> <td>413.46</td> <td>67.15</td> <td>0.01</td> <td>-42.96</td> </tr> <tr> <td>10 uM</td> <td>95.64</td> <td>0.91</td> <td>94.09</td> <td>59.10</td> <td>0.01</td> <td>-46.53</td> </tr> </tbody> </table> | Average Response |                        |                            |            |                      |                          |  | Dose | Green Signal | Actual Pct Green Cells | Normalized Pct Green Cells | Red Signal | Actual Pct Red Cells | Normalized Pct Red Cells | 0.1 uM | 107.07 | 0.88 | 86.18 | 75.72 | 0.03 | -55.07 | 1 uM | 81.30 | 0.76 | 413.46 | 67.15 | 0.01 | -42.96 | 10 uM | 95.64 | 0.91 | 94.09 | 59.10 | 0.01 | -46.53 |
|                               |                                  | Average Response                                                                                                                                                                                                                                                                                                                                                                                                                                                                                                                                                                                                                                                                 |                  |                        |                            |            |                      |                          |  |      |              |                        |                            |            |                      |                          |        |        |      |       |       |      |        |      |       |      |        |       |      |        |       |       |      |       |       |      |        |
|                               |                                  | Dose                                                                                                                                                                                                                                                                                                                                                                                                                                                                                                                                                                                                                                                                             | Green Signal     | Actual Pct Green Cells | Normalized Pct Green Cells | Red Signal | Actual Pct Red Cells | Normalized Pct Red Cells |  |      |              |                        |                            |            |                      |                          |        |        |      |       |       |      |        |      |       |      |        |       |      |        |       |       |      |       |       |      |        |
|                               |                                  | 0.1 uM                                                                                                                                                                                                                                                                                                                                                                                                                                                                                                                                                                                                                                                                           | 107.07           | 0.88                   | 86.18                      | 75.72      | 0.03                 | -55.07                   |  |      |              |                        |                            |            |                      |                          |        |        |      |       |       |      |        |      |       |      |        |       |      |        |       |       |      |       |       |      |        |
| 1 uM                          | 81.30                            | 0.76                                                                                                                                                                                                                                                                                                                                                                                                                                                                                                                                                                                                                                                                             | 413.46           | 67.15                  | 0.01                       | -42.96     |                      |                          |  |      |              |                        |                            |            |                      |                          |        |        |      |       |       |      |        |      |       |      |        |       |      |        |       |       |      |       |       |      |        |
| 10 uM                         | 95.64                            | 0.91                                                                                                                                                                                                                                                                                                                                                                                                                                                                                                                                                                                                                                                                             | 94.09            | 59.10                  | 0.01                       | -46.53     |                      |                          |  |      |              |                        |                            |            |                      |                          |        |        |      |       |       |      |        |      |       |      |        |       |      |        |       |       |      |       |       |      |        |

| Compound         | Normalized Values (A and B Sets) | Responses                                                                                                                                                                                                                                                                                                                                                                                                                                                                                                                                                                                                                                                                        |                  |                        |                            |            |                      |                          |  |      |              |                        |                            |            |                      |                          |        |        |      |       |       |      |        |      |       |      |      |        |      |        |       |       |      |       |        |      |        |
|------------------|----------------------------------|----------------------------------------------------------------------------------------------------------------------------------------------------------------------------------------------------------------------------------------------------------------------------------------------------------------------------------------------------------------------------------------------------------------------------------------------------------------------------------------------------------------------------------------------------------------------------------------------------------------------------------------------------------------------------------|------------------|------------------------|----------------------------|------------|----------------------|--------------------------|--|------|--------------|------------------------|----------------------------|------------|----------------------|--------------------------|--------|--------|------|-------|-------|------|--------|------|-------|------|------|--------|------|--------|-------|-------|------|-------|--------|------|--------|
| <b>Betaxolol</b> |                                  | <table border="1"> <thead> <tr> <th colspan="7">Average Response</th> </tr> <tr> <th>Dose</th> <th>Green Signal</th> <th>Actual Pct Green Cells</th> <th>Normalized Pct Green Cells</th> <th>Red Signal</th> <th>Actual Pct Red Cells</th> <th>Normalized Pct Red Cells</th> </tr> </thead> <tbody> <tr> <td>0.1 uM</td> <td>108.65</td> <td>0.90</td> <td>77.24</td> <td>91.36</td> <td>0.05</td> <td>-45.51</td> </tr> <tr> <td>1 uM</td> <td>97.58</td> <td>0.79</td> <td>3.50</td> <td>103.70</td> <td>0.10</td> <td>-13.22</td> </tr> <tr> <td>10 uM</td> <td>92.42</td> <td>0.76</td> <td>16.89</td> <td>109.70</td> <td>0.09</td> <td>-16.99</td> </tr> </tbody> </table> | Average Response |                        |                            |            |                      |                          |  | Dose | Green Signal | Actual Pct Green Cells | Normalized Pct Green Cells | Red Signal | Actual Pct Red Cells | Normalized Pct Red Cells | 0.1 uM | 108.65 | 0.90 | 77.24 | 91.36 | 0.05 | -45.51 | 1 uM | 97.58 | 0.79 | 3.50 | 103.70 | 0.10 | -13.22 | 10 uM | 92.42 | 0.76 | 16.89 | 109.70 | 0.09 | -16.99 |
|                  |                                  | Average Response                                                                                                                                                                                                                                                                                                                                                                                                                                                                                                                                                                                                                                                                 |                  |                        |                            |            |                      |                          |  |      |              |                        |                            |            |                      |                          |        |        |      |       |       |      |        |      |       |      |      |        |      |        |       |       |      |       |        |      |        |
|                  |                                  | Dose                                                                                                                                                                                                                                                                                                                                                                                                                                                                                                                                                                                                                                                                             | Green Signal     | Actual Pct Green Cells | Normalized Pct Green Cells | Red Signal | Actual Pct Red Cells | Normalized Pct Red Cells |  |      |              |                        |                            |            |                      |                          |        |        |      |       |       |      |        |      |       |      |      |        |      |        |       |       |      |       |        |      |        |
|                  |                                  | 0.1 uM                                                                                                                                                                                                                                                                                                                                                                                                                                                                                                                                                                                                                                                                           | 108.65           | 0.90                   | 77.24                      | 91.36      | 0.05                 | -45.51                   |  |      |              |                        |                            |            |                      |                          |        |        |      |       |       |      |        |      |       |      |      |        |      |        |       |       |      |       |        |      |        |
| 1 uM             | 97.58                            | 0.79                                                                                                                                                                                                                                                                                                                                                                                                                                                                                                                                                                                                                                                                             | 3.50             | 103.70                 | 0.10                       | -13.22     |                      |                          |  |      |              |                        |                            |            |                      |                          |        |        |      |       |       |      |        |      |       |      |      |        |      |        |       |       |      |       |        |      |        |
| 10 uM            | 92.42                            | 0.76                                                                                                                                                                                                                                                                                                                                                                                                                                                                                                                                                                                                                                                                             | 16.89            | 109.70                 | 0.09                       | -16.99     |                      |                          |  |      |              |                        |                            |            |                      |                          |        |        |      |       |       |      |        |      |       |      |      |        |      |        |       |       |      |       |        |      |        |

| Compound              | Normalized Values (A and B Sets) | Responses                                                                                                                                                                                                                                                                                                                                                                                                                                                                                                                                                                                                                                                                        |                  |                        |                            |            |                      |                          |  |      |              |                        |                            |            |                      |                          |        |       |      |        |       |      |        |      |       |      |        |       |      |        |       |       |      |       |       |      |        |
|-----------------------|----------------------------------|----------------------------------------------------------------------------------------------------------------------------------------------------------------------------------------------------------------------------------------------------------------------------------------------------------------------------------------------------------------------------------------------------------------------------------------------------------------------------------------------------------------------------------------------------------------------------------------------------------------------------------------------------------------------------------|------------------|------------------------|----------------------------|------------|----------------------|--------------------------|--|------|--------------|------------------------|----------------------------|------------|----------------------|--------------------------|--------|-------|------|--------|-------|------|--------|------|-------|------|--------|-------|------|--------|-------|-------|------|-------|-------|------|--------|
| <b>Betulinic acid</b> |                                  | <table border="1"> <thead> <tr> <th colspan="7">Average Response</th> </tr> <tr> <th>Dose</th> <th>Green Signal</th> <th>Actual Pct Green Cells</th> <th>Normalized Pct Green Cells</th> <th>Red Signal</th> <th>Actual Pct Red Cells</th> <th>Normalized Pct Red Cells</th> </tr> </thead> <tbody> <tr> <td>0.1 uM</td> <td>85.22</td> <td>0.80</td> <td>105.28</td> <td>81.10</td> <td>0.03</td> <td>-47.54</td> </tr> <tr> <td>1 uM</td> <td>80.75</td> <td>0.65</td> <td>-48.81</td> <td>78.68</td> <td>0.03</td> <td>-50.72</td> </tr> <tr> <td>10 uM</td> <td>89.44</td> <td>0.78</td> <td>90.03</td> <td>66.84</td> <td>0.01</td> <td>-61.16</td> </tr> </tbody> </table> | Average Response |                        |                            |            |                      |                          |  | Dose | Green Signal | Actual Pct Green Cells | Normalized Pct Green Cells | Red Signal | Actual Pct Red Cells | Normalized Pct Red Cells | 0.1 uM | 85.22 | 0.80 | 105.28 | 81.10 | 0.03 | -47.54 | 1 uM | 80.75 | 0.65 | -48.81 | 78.68 | 0.03 | -50.72 | 10 uM | 89.44 | 0.78 | 90.03 | 66.84 | 0.01 | -61.16 |
|                       |                                  | Average Response                                                                                                                                                                                                                                                                                                                                                                                                                                                                                                                                                                                                                                                                 |                  |                        |                            |            |                      |                          |  |      |              |                        |                            |            |                      |                          |        |       |      |        |       |      |        |      |       |      |        |       |      |        |       |       |      |       |       |      |        |
|                       |                                  | Dose                                                                                                                                                                                                                                                                                                                                                                                                                                                                                                                                                                                                                                                                             | Green Signal     | Actual Pct Green Cells | Normalized Pct Green Cells | Red Signal | Actual Pct Red Cells | Normalized Pct Red Cells |  |      |              |                        |                            |            |                      |                          |        |       |      |        |       |      |        |      |       |      |        |       |      |        |       |       |      |       |       |      |        |
|                       |                                  | 0.1 uM                                                                                                                                                                                                                                                                                                                                                                                                                                                                                                                                                                                                                                                                           | 85.22            | 0.80                   | 105.28                     | 81.10      | 0.03                 | -47.54                   |  |      |              |                        |                            |            |                      |                          |        |       |      |        |       |      |        |      |       |      |        |       |      |        |       |       |      |       |       |      |        |
| 1 uM                  | 80.75                            | 0.65                                                                                                                                                                                                                                                                                                                                                                                                                                                                                                                                                                                                                                                                             | -48.81           | 78.68                  | 0.03                       | -50.72     |                      |                          |  |      |              |                        |                            |            |                      |                          |        |       |      |        |       |      |        |      |       |      |        |       |      |        |       |       |      |       |       |      |        |
| 10 uM                 | 89.44                            | 0.78                                                                                                                                                                                                                                                                                                                                                                                                                                                                                                                                                                                                                                                                             | 90.03            | 66.84                  | 0.01                       | -61.16     |                      |                          |  |      |              |                        |                            |            |                      |                          |        |       |      |        |       |      |        |      |       |      |        |       |      |        |       |       |      |       |       |      |        |

| Compound                   | Normalized Values (A and B Sets) | Responses                                                                                                                                                                                                                                                                                                                                                                                                                                                                                                                                                                                                                                                                        |                  |                        |                            |            |                      |                          |  |      |              |                        |                            |            |                      |                          |        |       |      |       |       |      |        |      |       |      |       |        |      |        |       |       |      |        |       |      |        |
|----------------------------|----------------------------------|----------------------------------------------------------------------------------------------------------------------------------------------------------------------------------------------------------------------------------------------------------------------------------------------------------------------------------------------------------------------------------------------------------------------------------------------------------------------------------------------------------------------------------------------------------------------------------------------------------------------------------------------------------------------------------|------------------|------------------------|----------------------------|------------|----------------------|--------------------------|--|------|--------------|------------------------|----------------------------|------------|----------------------|--------------------------|--------|-------|------|-------|-------|------|--------|------|-------|------|-------|--------|------|--------|-------|-------|------|--------|-------|------|--------|
| <b>BGJ398 (NVP-BGJ398)</b> |                                  | <table border="1"> <thead> <tr> <th colspan="7">Average Response</th> </tr> <tr> <th>Dose</th> <th>Green Signal</th> <th>Actual Pct Green Cells</th> <th>Normalized Pct Green Cells</th> <th>Red Signal</th> <th>Actual Pct Red Cells</th> <th>Normalized Pct Red Cells</th> </tr> </thead> <tbody> <tr> <td>0.1 uM</td> <td>92.86</td> <td>0.83</td> <td>22.35</td> <td>80.79</td> <td>0.05</td> <td>-29.61</td> </tr> <tr> <td>1 uM</td> <td>94.98</td> <td>0.82</td> <td>68.87</td> <td>103.73</td> <td>0.10</td> <td>-12.22</td> </tr> <tr> <td>10 uM</td> <td>91.11</td> <td>0.87</td> <td>185.02</td> <td>73.79</td> <td>0.02</td> <td>-50.19</td> </tr> </tbody> </table> | Average Response |                        |                            |            |                      |                          |  | Dose | Green Signal | Actual Pct Green Cells | Normalized Pct Green Cells | Red Signal | Actual Pct Red Cells | Normalized Pct Red Cells | 0.1 uM | 92.86 | 0.83 | 22.35 | 80.79 | 0.05 | -29.61 | 1 uM | 94.98 | 0.82 | 68.87 | 103.73 | 0.10 | -12.22 | 10 uM | 91.11 | 0.87 | 185.02 | 73.79 | 0.02 | -50.19 |
|                            |                                  | Average Response                                                                                                                                                                                                                                                                                                                                                                                                                                                                                                                                                                                                                                                                 |                  |                        |                            |            |                      |                          |  |      |              |                        |                            |            |                      |                          |        |       |      |       |       |      |        |      |       |      |       |        |      |        |       |       |      |        |       |      |        |
|                            |                                  | Dose                                                                                                                                                                                                                                                                                                                                                                                                                                                                                                                                                                                                                                                                             | Green Signal     | Actual Pct Green Cells | Normalized Pct Green Cells | Red Signal | Actual Pct Red Cells | Normalized Pct Red Cells |  |      |              |                        |                            |            |                      |                          |        |       |      |       |       |      |        |      |       |      |       |        |      |        |       |       |      |        |       |      |        |
|                            |                                  | 0.1 uM                                                                                                                                                                                                                                                                                                                                                                                                                                                                                                                                                                                                                                                                           | 92.86            | 0.83                   | 22.35                      | 80.79      | 0.05                 | -29.61                   |  |      |              |                        |                            |            |                      |                          |        |       |      |       |       |      |        |      |       |      |       |        |      |        |       |       |      |        |       |      |        |
| 1 uM                       | 94.98                            | 0.82                                                                                                                                                                                                                                                                                                                                                                                                                                                                                                                                                                                                                                                                             | 68.87            | 103.73                 | 0.10                       | -12.22     |                      |                          |  |      |              |                        |                            |            |                      |                          |        |       |      |       |       |      |        |      |       |      |       |        |      |        |       |       |      |        |       |      |        |
| 10 uM                      | 91.11                            | 0.87                                                                                                                                                                                                                                                                                                                                                                                                                                                                                                                                                                                                                                                                             | 185.02           | 73.79                  | 0.02                       | -50.19     |                      |                          |  |      |              |                        |                            |            |                      |                          |        |       |      |       |       |      |        |      |       |      |       |        |      |        |       |       |      |        |       |      |        |

Compound

Normalized Values (A and B Sets)

Responses

| BGT226 (NVP-BGT226) | Percent Green Cells (AB) |      | Percent Red Cells (AB) |        | Average Response |              |                        |                            |            |                      |                          |       |       |
|---------------------|--------------------------|------|------------------------|--------|------------------|--------------|------------------------|----------------------------|------------|----------------------|--------------------------|-------|-------|
|                     | Percent Response         |      | Percent Response       |        | Dose             | Green Signal | Actual Pct Green Cells | Normalized Pct Green Cells | Red Signal | Actual Pct Red Cells | Normalized Pct Red Cells |       |       |
|                     | concentration            |      | concentration          |        | 0.1 uM           | 1 uM         | 10 uM                  | 0.1 uM                     | 1 uM       | 10 uM                | 0.1 uM                   | 1 uM  | 10 uM |
|                     | 0.1 uM                   | 1 uM | 10 uM                  | 0.1 uM | 1 uM             | 10 uM        | 0.1 uM                 | 1 uM                       | 10 uM      | 0.1 uM               | 1 uM                     | 10 uM |       |
|                     | 100                      | 100  | 100                    | 0      | 0.1 uM           | 104.85       | 0.94                   | 142.21                     | 102.16     | 0.12                 | 2.54                     |       |       |
|                     | 0                        | 0    | 0                      | 0      | 1 uM             | 62.47        | 0.38                   | 148.88                     | 68.78      | 0.05                 | -34.74                   |       |       |
|                     | 0                        | 0    | 0                      | 0      | 10 uM            | 101.29       | 0.93                   | 478.09                     | 92.14      | 0.04                 | -37.81                   |       |       |

Compound

Normalized Values (A and B Sets)

Responses

| BI 78D3 | Percent Green Cells (AB) |      | Percent Red Cells (AB) |        | Average Response |              |                        |                            |            |                      |                          |       |       |
|---------|--------------------------|------|------------------------|--------|------------------|--------------|------------------------|----------------------------|------------|----------------------|--------------------------|-------|-------|
|         | Percent Response         |      | Percent Response       |        | Dose             | Green Signal | Actual Pct Green Cells | Normalized Pct Green Cells | Red Signal | Actual Pct Red Cells | Normalized Pct Red Cells |       |       |
|         | concentration            |      | concentration          |        | 0.1 uM           | 1 uM         | 10 uM                  | 0.1 uM                     | 1 uM       | 10 uM                | 0.1 uM                   | 1 uM  | 10 uM |
|         | 0.1 uM                   | 1 uM | 10 uM                  | 0.1 uM | 1 uM             | 10 uM        | 0.1 uM                 | 1 uM                       | 10 uM      | 0.1 uM               | 1 uM                     | 10 uM |       |
|         | 100                      | 100  | 75                     | 0      | 0.1 uM           | 93.02        | 0.82                   | 28.72                      | 90.93      | 0.07                 | -31.81                   |       |       |
|         | 0                        | 0    | 0                      | 0      | 1 uM             | 92.27        | 0.85                   | 195.72                     | 87.80      | 0.05                 | -20.48                   |       |       |
|         | 0                        | 0    | 0                      | 0      | 10 uM            | 85.81        | 0.84                   | 26.79                      | 96.48      | 0.14                 | 9.64                     |       |       |

Compound

Normalized Values (A and B Sets)

Responses

| BI-D1870 | Percent Green Cells (AB) |      | Percent Red Cells (AB) |        | Average Response |              |                        |                            |            |                      |                          |       |       |
|----------|--------------------------|------|------------------------|--------|------------------|--------------|------------------------|----------------------------|------------|----------------------|--------------------------|-------|-------|
|          | Percent Response         |      | Percent Response       |        | Dose             | Green Signal | Actual Pct Green Cells | Normalized Pct Green Cells | Red Signal | Actual Pct Red Cells | Normalized Pct Red Cells |       |       |
|          | concentration            |      | concentration          |        | 0.1 uM           | 1 uM         | 10 uM                  | 0.1 uM                     | 1 uM       | 10 uM                | 0.1 uM                   | 1 uM  | 10 uM |
|          | 0.1 uM                   | 1 uM | 10 uM                  | 0.1 uM | 1 uM             | 10 uM        | 0.1 uM                 | 1 uM                       | 10 uM      | 0.1 uM               | 1 uM                     | 10 uM |       |
|          | 85                       | 85   | 20                     | 25     | 0.1 uM           | 100.62       | 0.88                   | 87.14                      | 103.61     | 0.13                 | 6.84                     |       |       |
|          | 0                        | 0    | 0                      | 0      | 1 uM             | 88.66        | 0.77                   | 38.50                      | 75.83      | 0.02                 | -47.47                   |       |       |
|          | 0                        | 0    | 0                      | 0      | 10 uM            | 123.08       | 0.99                   | 569.62                     | 108.08     | 0.12                 | -1.10                    |       |       |

Compound

Normalized Values (A and B Sets)

Responses

| BIBR 1532 | Percent Green Cells (AB) |      | Percent Red Cells (AB) |        | Average Response |              |                        |                            |            |                      |                          |       |       |
|-----------|--------------------------|------|------------------------|--------|------------------|--------------|------------------------|----------------------------|------------|----------------------|--------------------------|-------|-------|
|           | Percent Response         |      | Percent Response       |        | Dose             | Green Signal | Actual Pct Green Cells | Normalized Pct Green Cells | Red Signal | Actual Pct Red Cells | Normalized Pct Red Cells |       |       |
|           | concentration            |      | concentration          |        | 0.1 uM           | 1 uM         | 10 uM                  | 0.1 uM                     | 1 uM       | 10 uM                | 0.1 uM                   | 1 uM  | 10 uM |
|           | 0.1 uM                   | 1 uM | 10 uM                  | 0.1 uM | 1 uM             | 10 uM        | 0.1 uM                 | 1 uM                       | 10 uM      | 0.1 uM               | 1 uM                     | 10 uM |       |
|           | 65                       | 75   | 100                    | 0      | 0.1 uM           | 98.69        | 0.87                   | 72.20                      | 89.76      | 0.05                 | -48.47                   |       |       |
|           | 0                        | 0    | 0                      | 0      | 1 uM             | 100.98       | 0.83                   | 74.65                      | 90.99      | 0.06                 | -28.63                   |       |       |
|           | 0                        | 0    | 0                      | 0      | 10 uM            | 96.52        | 0.81                   | 54.03                      | 82.36      | 0.03                 | -39.16                   |       |       |

Compound

Normalized Values (A and B Sets)

Responses

| BIIB021 | Percent Green Cells (AB) |      | Percent Red Cells (AB) |        | Average Response |              |                        |                            |            |                      |                          |       |       |
|---------|--------------------------|------|------------------------|--------|------------------|--------------|------------------------|----------------------------|------------|----------------------|--------------------------|-------|-------|
|         | Percent Response         |      | Percent Response       |        | Dose             | Green Signal | Actual Pct Green Cells | Normalized Pct Green Cells | Red Signal | Actual Pct Red Cells | Normalized Pct Red Cells |       |       |
|         | concentration            |      | concentration          |        | 0.1 uM           | 1 uM         | 10 uM                  | 0.1 uM                     | 1 uM       | 10 uM                | 0.1 uM                   | 1 uM  | 10 uM |
|         | 0.1 uM                   | 1 uM | 10 uM                  | 0.1 uM | 1 uM             | 10 uM        | 0.1 uM                 | 1 uM                       | 10 uM      | 0.1 uM               | 1 uM                     | 10 uM |       |
|         | 100                      | 35   | 50                     | 0      | 0.1 uM           | 104.44       | 0.89                   | 53.68                      | 97.72      | 0.08                 | -25.37                   |       |       |
|         | 0                        | 0    | 0                      | 0      | 1 uM             | 93.63        | 0.77                   | 0.33                       | 114.67     | 0.14                 | 6.12                     |       |       |
|         | 0                        | 0    | 0                      | 0      | 10 uM            | 87.76        | 0.63                   | -52.75                     | 93.25      | 0.09                 | -10.32                   |       |       |

Compound

Normalized Values (A and B Sets)

Responses

| Bilobalide | Percent Green Cells (AB) |      | Percent Red Cells (AB) |        | Average Response |              |                        |                            |            |                      |                          |
|------------|--------------------------|------|------------------------|--------|------------------|--------------|------------------------|----------------------------|------------|----------------------|--------------------------|
|            | Percent Response         |      | Percent Response       |        | Dose             | Green Signal | Actual Pct Green Cells | Normalized Pct Green Cells | Red Signal | Actual Pct Red Cells | Normalized Pct Red Cells |
|            | concentration            |      | concentration          |        | 0.1 uM           | 109.00       | 0.95                   | 154.58                     | 107.35     | 0.15                 | 17.36                    |
|            | 0.1 uM                   | 1 uM | 10 uM                  | 0.1 uM | 1 uM             | 10 uM        | 1 uM                   | 0.78                       | 46.59      | 78.29                | 0.04                     |
|            |                          |      |                        |        | 10 uM            | 100.88       | 0.90                   | 15.59                      | 89.67      | 0.05                 | -32.37                   |

Compound

Normalized Values (A and B Sets)

Responses

| Bimatoprost | Percent Green Cells (AB) |      | Percent Red Cells (AB) |        | Average Response |              |                        |                            |            |                      |                          |
|-------------|--------------------------|------|------------------------|--------|------------------|--------------|------------------------|----------------------------|------------|----------------------|--------------------------|
|             | Percent Response         |      | Percent Response       |        | Dose             | Green Signal | Actual Pct Green Cells | Normalized Pct Green Cells | Red Signal | Actual Pct Red Cells | Normalized Pct Red Cells |
|             | concentration            |      | concentration          |        | 0.1 uM           | 98.68        | 0.88                   | 69.93                      | 75.61      | 0.02                 | -63.11                   |
|             | 0.1 uM                   | 1 uM | 10 uM                  | 0.1 uM | 1 uM             | 10 uM        | 1 uM                   | 0.91                       | 138.83     | 119.43               | 0.18                     |
|             |                          |      |                        |        | 10 uM            | 109.40       | 0.86                   | 77.75                      | 114.07     | 0.13                 | 2.01                     |

Compound

Normalized Values (A and B Sets)

Responses

| Bindarit | Percent Green Cells (AB) |      | Percent Red Cells (AB) |        | Average Response |              |                        |                            |            |                      |                          |
|----------|--------------------------|------|------------------------|--------|------------------|--------------|------------------------|----------------------------|------------|----------------------|--------------------------|
|          | Percent Response         |      | Percent Response       |        | Dose             | Green Signal | Actual Pct Green Cells | Normalized Pct Green Cells | Red Signal | Actual Pct Red Cells | Normalized Pct Red Cells |
|          | concentration            |      | concentration          |        | 0.1 uM           | 79.86        | 0.70                   | -83.16                     | 73.00      | 0.03                 | -50.71                   |
|          | 0.1 uM                   | 1 uM | 10 uM                  | 0.1 uM | 1 uM             | 10 uM        | 1 uM                   | 0.79                       | 51.97      | 78.67                | 0.04                     |
|          |                          |      |                        |        | 10 uM            | 97.02        | 0.79                   | -39.20                     | 72.38      | 0.03                 | -49.73                   |

Compound

Normalized Values (A and B Sets)

Responses

| BIO | Percent Green Cells (AB) |      | Percent Red Cells (AB) |        | Average Response |              |                        |                            |            |                      |                          |
|-----|--------------------------|------|------------------------|--------|------------------|--------------|------------------------|----------------------------|------------|----------------------|--------------------------|
|     | Percent Response         |      | Percent Response       |        | Dose             | Green Signal | Actual Pct Green Cells | Normalized Pct Green Cells | Red Signal | Actual Pct Red Cells | Normalized Pct Red Cells |
|     | concentration            |      | concentration          |        | 0.1 uM           | 100.40       | 0.88                   | 89.10                      | 105.20     | 0.13                 | 4.07                     |
|     | 0.1 uM                   | 1 uM | 10 uM                  | 0.1 uM | 1 uM             | 10 uM        | 1 uM                   | 0.92                       | 186.08     | 96.58                | 0.12                     |
|     |                          |      |                        |        | 10 uM            | 130.76       | 0.94                   | 124.68                     | 391.58     | 0.92                 | 355.29                   |

Compound

Normalized Values (A and B Sets)

Responses

| Biochanin A | Percent Green Cells (AB) |      | Percent Red Cells (AB) |        | Average Response |              |                        |                            |            |                      |                          |
|-------------|--------------------------|------|------------------------|--------|------------------|--------------|------------------------|----------------------------|------------|----------------------|--------------------------|
|             | Percent Response         |      | Percent Response       |        | Dose             | Green Signal | Actual Pct Green Cells | Normalized Pct Green Cells | Red Signal | Actual Pct Red Cells | Normalized Pct Red Cells |
|             | concentration            |      | concentration          |        | 0.1 uM           | 90.80        | 0.84                   | 43.53                      | 67.91      | 0.01                 | -49.15                   |
|             | 0.1 uM                   | 1 uM | 10 uM                  | 0.1 uM | 1 uM             | 10 uM        | 1 uM                   | 0.76                       | 27.37      | 66.19                | 0.02                     |
|             |                          |      |                        |        | 10 uM            | 88.31        | 0.83                   | 263.91                     | 65.19      | 0.01                 | -51.87                   |

Compound

Normalized Values (A and B Sets)

Responses

| Biperiden HCl | Percent Green Cells (AB) |  | Percent Red Cells (AB)  |  | Average Response |              |                        |                            |            |                      |                          |
|---------------|--------------------------|--|-------------------------|--|------------------|--------------|------------------------|----------------------------|------------|----------------------|--------------------------|
|               | 100<br>Percent Response  |  | 100<br>Percent Response |  | Dose             | Green Signal | Actual Pct Green Cells | Normalized Pct Green Cells | Red Signal | Actual Pct Red Cells | Normalized Pct Red Cells |
|               | 0.1 uM 1 uM 10 uM        |  | 0.1 uM 1 uM 10 uM       |  | 0.1 uM           | 88.75        | 0.80                   | -56.27                     | 80.98      | 0.03                 | -58.11                   |
|               | concentration            |  | concentration           |  | 1 uM             | 107.52       | 0.90                   | 111.33                     | 72.83      | 0.02                 | -50.24                   |
|               |                          |  |                         |  | 10 uM            | 84.93        | 0.75                   | 12.33                      | 103.33     | 0.06                 | -30.26                   |

Compound

Normalized Values (A and B Sets)

Responses

| BIRB 796 (Doramapimod) | Percent Green Cells (AB) |  | Percent Red Cells (AB)  |  | Average Response |              |                        |                            |            |                      |                          |
|------------------------|--------------------------|--|-------------------------|--|------------------|--------------|------------------------|----------------------------|------------|----------------------|--------------------------|
|                        | 100<br>Percent Response  |  | 100<br>Percent Response |  | Dose             | Green Signal | Actual Pct Green Cells | Normalized Pct Green Cells | Red Signal | Actual Pct Red Cells | Normalized Pct Red Cells |
|                        | 0.1 uM 1 uM 10 uM        |  | 0.1 uM 1 uM 10 uM       |  | 0.1 uM           | 97.26        | 0.89                   | 106.66                     | 89.15      | 0.04                 | -49.46                   |
|                        | concentration            |  | concentration           |  | 1 uM             | 88.60        | 0.76                   | -56.36                     | 97.54      | 0.07                 | -25.69                   |
|                        |                          |  |                         |  | 10 uM            | 82.40        | 0.73                   | 0.68                       | 86.04      | 0.04                 | -38.65                   |

Compound

Normalized Values (A and B Sets)

Responses

| Birinapant | Percent Green Cells (AB) |  | Percent Red Cells (AB)  |  | Average Response |              |                        |                            |            |                      |                          |
|------------|--------------------------|--|-------------------------|--|------------------|--------------|------------------------|----------------------------|------------|----------------------|--------------------------|
|            | 100<br>Percent Response  |  | 100<br>Percent Response |  | Dose             | Green Signal | Actual Pct Green Cells | Normalized Pct Green Cells | Red Signal | Actual Pct Red Cells | Normalized Pct Red Cells |
|            | 0.1 uM 1 uM 10 uM        |  | 0.1 uM 1 uM 10 uM       |  | 0.1 uM           | 102.79       | 0.85                   | 58.20                      | 94.79      | 0.13                 | 4.25                     |
|            | concentration            |  | concentration           |  | 1 uM             | 84.02        | 0.70                   | 171.60                     | 102.47     | 0.15                 | 26.47                    |
|            |                          |  |                         |  | 10 uM            | 108.23       | 0.88                   | 65.07                      | 97.62      | 0.14                 | 10.80                    |

Compound

Normalized Values (A and B Sets)

Responses

| BIX 01294 | Percent Green Cells (AB) |  | Percent Red Cells (AB)  |  | Average Response |              |                        |                            |            |                      |                          |
|-----------|--------------------------|--|-------------------------|--|------------------|--------------|------------------------|----------------------------|------------|----------------------|--------------------------|
|           | 100<br>Percent Response  |  | 100<br>Percent Response |  | Dose             | Green Signal | Actual Pct Green Cells | Normalized Pct Green Cells | Red Signal | Actual Pct Red Cells | Normalized Pct Red Cells |
|           | 0.1 uM 1 uM 10 uM        |  | 0.1 uM 1 uM 10 uM       |  | 0.1 uM           | 87.34        | 0.82                   | 43.05                      | 71.19      | 0.02                 | -65.72                   |
|           | concentration            |  | concentration           |  | 1 uM             | 88.11        | 0.82                   | 164.53                     | 86.00      | 0.08                 | 2.13                     |
|           |                          |  |                         |  | 10 uM            | 102.65       | 0.97                   | 143.80                     | 99.16      | 0.11                 | -3.87                    |

Compound

Normalized Values (A and B Sets)

Responses

| BIX 02188 | Percent Green Cells (AB) |  | Percent Red Cells (AB)  |  | Average Response |              |                        |                            |            |                      |                          |
|-----------|--------------------------|--|-------------------------|--|------------------|--------------|------------------------|----------------------------|------------|----------------------|--------------------------|
|           | 100<br>Percent Response  |  | 100<br>Percent Response |  | Dose             | Green Signal | Actual Pct Green Cells | Normalized Pct Green Cells | Red Signal | Actual Pct Red Cells | Normalized Pct Red Cells |
|           | 0.1 uM 1 uM 10 uM        |  | 0.1 uM 1 uM 10 uM       |  | 0.1 uM           | 92.71        | 0.82                   | 22.78                      | 113.69     | 0.15                 | 7.63                     |
|           | concentration            |  | concentration           |  | 1 uM             | 104.69       | 0.90                   | 75.45                      | 119.71     | 0.16                 | 18.07                    |
|           |                          |  |                         |  | 10 uM            | 105.04       | 0.87                   | 96.56                      | 114.14     | 0.12                 | 0.56                     |



Compound

Normalized Values (A and B Sets)

Responses

|                  |        |                         |              |                        |                            |            |                      |                          |
|------------------|--------|-------------------------|--------------|------------------------|----------------------------|------------|----------------------|--------------------------|
| <b>BIX 02189</b> |        | <b>Average Response</b> |              |                        |                            |            |                      |                          |
|                  |        | Dose                    | Green Signal | Actual Pct Green Cells | Normalized Pct Green Cells | Red Signal | Actual Pct Red Cells | Normalized Pct Red Cells |
|                  |        | 0.1 uM                  | 89.99        | 0.77                   | -55.18                     | 90.12      | 0.08                 | -31.44                   |
|                  |        | 1 uM                    | 97.00        | 0.84                   | 50.48                      | 108.74     | 0.12                 | -2.03                    |
| 10 uM            | 112.28 | 0.95                    | 147.96       | 141.36                 | 0.20                       | 38.19      |                      |                          |

Compound

Normalized Values (A and B Sets)

Responses

|                                        |        |                         |              |                        |                            |            |                      |                          |
|----------------------------------------|--------|-------------------------|--------------|------------------------|----------------------------|------------|----------------------|--------------------------|
| <b>BKM120 (NVP-BKM120, Buparlisib)</b> |        | <b>Average Response</b> |              |                        |                            |            |                      |                          |
|                                        |        | Dose                    | Green Signal | Actual Pct Green Cells | Normalized Pct Green Cells | Red Signal | Actual Pct Red Cells | Normalized Pct Red Cells |
|                                        |        | 0.1 uM                  | 96.67        | 0.88                   | 88.54                      | 76.93      | 0.03                 | -39.07                   |
|                                        |        | 1 uM                    | 99.35        | 0.90                   | 104.31                     | 75.25      | 0.02                 | -45.52                   |
| 10 uM                                  | 112.49 | 0.96                    | 356.44       | 92.93                  | 0.09                       | -16.98     |                      |                          |

Compound

Normalized Values (A and B Sets)

Responses

|                          |       |                         |              |                        |                            |            |                      |                          |
|--------------------------|-------|-------------------------|--------------|------------------------|----------------------------|------------|----------------------|--------------------------|
| <b>Bleomycin Sulfate</b> |       | <b>Average Response</b> |              |                        |                            |            |                      |                          |
|                          |       | Dose                    | Green Signal | Actual Pct Green Cells | Normalized Pct Green Cells | Red Signal | Actual Pct Red Cells | Normalized Pct Red Cells |
|                          |       | 0.1 uM                  | 93.02        | 0.86                   | 75.54                      | 83.37      | 0.03                 | -53.78                   |
|                          |       | 1 uM                    | 88.22        | 0.79                   | 8.65                       | 101.39     | 0.14                 | 31.25                    |
| 10 uM                    | 91.95 | 0.85                    | 35.49        | 72.87                  | 0.04                       | -33.32     |                      |                          |

Compound

Normalized Values (A and B Sets)

Responses

|                |        |                         |              |                        |                            |            |                      |                          |
|----------------|--------|-------------------------|--------------|------------------------|----------------------------|------------|----------------------|--------------------------|
| <b>BM- 266</b> |        | <b>Average Response</b> |              |                        |                            |            |                      |                          |
|                |        | Dose                    | Green Signal | Actual Pct Green Cells | Normalized Pct Green Cells | Red Signal | Actual Pct Red Cells | Normalized Pct Red Cells |
|                |        | 0.1 uM                  | 77.83        | 0.63                   | -113.23                    | 77.20      | 0.01                 | -66.62                   |
|                |        | 1 uM                    | 93.91        | 0.90                   | 22.22                      | 63.43      | 0.01                 | -44.05                   |
| 10 uM          | 100.87 | 0.97                    | 150.04       | 91.51                  | 0.08                       | -13.29     |                      |                          |

Compound

Normalized Values (A and B Sets)

Responses

|                |        |                         |              |                        |                            |            |                      |                          |
|----------------|--------|-------------------------|--------------|------------------------|----------------------------|------------|----------------------|--------------------------|
| <b>BML-190</b> |        | <b>Average Response</b> |              |                        |                            |            |                      |                          |
|                |        | Dose                    | Green Signal | Actual Pct Green Cells | Normalized Pct Green Cells | Red Signal | Actual Pct Red Cells | Normalized Pct Red Cells |
|                |        | 0.1 uM                  | 107.00       | 0.91                   | 120.62                     | 88.38      | 0.04                 | -50.48                   |
|                |        | 1 uM                    | 88.90        | 0.79                   | 74.40                      | 77.62      | 0.04                 | -30.82                   |
| 10 uM          | 102.55 | 0.91                    | 89.95        | 87.27                  | 0.11                       | -4.46      |                      |                          |

Compound

Normalized Values (A and B Sets)

Responses

| BML-277 | Percent Green Cells (AB) |  | Percent Red Cells (AB) |  | Average Response |              |                        |                            |            |                      |                          |
|---------|--------------------------|--|------------------------|--|------------------|--------------|------------------------|----------------------------|------------|----------------------|--------------------------|
|         | Percent Response         |  | Percent Response       |  | Dose             | Green Signal | Actual Pct Green Cells | Normalized Pct Green Cells | Red Signal | Actual Pct Red Cells | Normalized Pct Red Cells |
|         | 100                      |  | 100                    |  | 0.1 uM           | 90.21        | 0.84                   | 50.31                      | 65.87      | 0.01                 | -71.08                   |
|         | 0                        |  | 0                      |  | 1 uM             | 102.21       | 0.91                   | -59.31                     | 63.90      | 0.01                 | -45.33                   |
|         | 0.1 uM                   |  | 0.1 uM                 |  | 10 uM            | 92.00        | 0.91                   | 93.00                      | 64.45      | 0.04                 | -34.54                   |
|         | 1 uM                     |  | 1 uM                   |  |                  |              |                        |                            |            |                      |                          |
|         | 10 uM                    |  | 10 uM                  |  |                  |              |                        |                            |            |                      |                          |

Compound

Normalized Values (A and B Sets)

Responses

| BMN 673 | Percent Green Cells (AB) |  | Percent Red Cells (AB) |  | Average Response |              |                        |                            |            |                      |                          |
|---------|--------------------------|--|------------------------|--|------------------|--------------|------------------------|----------------------------|------------|----------------------|--------------------------|
|         | Percent Response         |  | Percent Response       |  | Dose             | Green Signal | Actual Pct Green Cells | Normalized Pct Green Cells | Red Signal | Actual Pct Red Cells | Normalized Pct Red Cells |
|         | 100                      |  | 100                    |  | 0.1 uM           | 92.54        | 0.85                   | -50.77                     | 93.87      | 0.11                 | -5.59                    |
|         | 0                        |  | 0                      |  | 1 uM             | 84.92        | 0.69                   | -16.15                     | 85.20      | 0.08                 | -27.84                   |
|         | 0.1 uM                   |  | 0.1 uM                 |  | 10 uM            | 117.97       | 0.95                   | 187.59                     | 93.50      | 0.09                 | -14.12                   |
|         | 1 uM                     |  | 1 uM                   |  |                  |              |                        |                            |            |                      |                          |
|         | 10 uM                    |  | 10 uM                  |  |                  |              |                        |                            |            |                      |                          |

Compound

Normalized Values (A and B Sets)

Responses

| BMS-265246 | Percent Green Cells (AB) |  | Percent Red Cells (AB) |  | Average Response |              |                        |                            |            |                      |                          |
|------------|--------------------------|--|------------------------|--|------------------|--------------|------------------------|----------------------------|------------|----------------------|--------------------------|
|            | Percent Response         |  | Percent Response       |  | Dose             | Green Signal | Actual Pct Green Cells | Normalized Pct Green Cells | Red Signal | Actual Pct Red Cells | Normalized Pct Red Cells |
|            | 100                      |  | 100                    |  | 0.1 uM           | 98.76        | 0.86                   | 55.56                      | 79.68      | 0.03                 | -53.25                   |
|            | 0                        |  | 0                      |  | 1 uM             | 119.56       | 0.93                   | 150.03                     | 92.19      | 0.06                 | -29.47                   |
|            | 0.1 uM                   |  | 0.1 uM                 |  | 10 uM            | 105.57       | 0.85                   | 85.73                      | 122.68     | 0.15                 | 4.98                     |
|            | 1 uM                     |  | 1 uM                   |  |                  |              |                        |                            |            |                      |                          |
|            | 10 uM                    |  | 10 uM                  |  |                  |              |                        |                            |            |                      |                          |

Compound

Normalized Values (A and B Sets)

Responses

| BMS-345541 | Percent Green Cells (AB) |  | Percent Red Cells (AB) |  | Average Response |              |                        |                            |            |                      |                          |
|------------|--------------------------|--|------------------------|--|------------------|--------------|------------------------|----------------------------|------------|----------------------|--------------------------|
|            | Percent Response         |  | Percent Response       |  | Dose             | Green Signal | Actual Pct Green Cells | Normalized Pct Green Cells | Red Signal | Actual Pct Red Cells | Normalized Pct Red Cells |
|            | 100                      |  | 100                    |  | 0.1 uM           | 109.64       | 0.88                   | 96.75                      | 113.27     | 0.18                 | 35.00                    |
|            | 0                        |  | 0                      |  | 1 uM             | 81.15        | 0.66                   | 1340.69                    | 62.95      | 0.01                 | -43.87                   |
|            | 0.1 uM                   |  | 0.1 uM                 |  | 10 uM            | 65.97        | 0.51                   | 266.86                     | 72.35      | 0.06                 | -24.73                   |
|            | 1 uM                     |  | 1 uM                   |  |                  |              |                        |                            |            |                      |                          |
|            | 10 uM                    |  | 10 uM                  |  |                  |              |                        |                            |            |                      |                          |

Compound

Normalized Values (A and B Sets)

Responses

| BMS-378806 | Percent Green Cells (AB) |  | Percent Red Cells (AB) |  | Average Response |              |                        |                            |            |                      |                          |
|------------|--------------------------|--|------------------------|--|------------------|--------------|------------------------|----------------------------|------------|----------------------|--------------------------|
|            | Percent Response         |  | Percent Response       |  | Dose             | Green Signal | Actual Pct Green Cells | Normalized Pct Green Cells | Red Signal | Actual Pct Red Cells | Normalized Pct Red Cells |
|            | 100                      |  | 100                    |  | 0.1 uM           | 99.55        | 0.89                   | 91.69                      | 96.06      | 0.09                 | -13.39                   |
|            | 0                        |  | 0                      |  | 1 uM             | 96.96        | 0.84                   | 64.38                      | 88.85      | 0.06                 | -28.18                   |
|            | 0.1 uM                   |  | 0.1 uM                 |  |                  |              |                        |                            |            |                      |                          |
|            | 1 uM                     |  | 1 uM                   |  |                  |              |                        |                            |            |                      |                          |
|            | 10 uM                    |  | 10 uM                  |  |                  |              |                        |                            |            |                      |                          |





Compound

Normalized Values (A and B Sets)

Responses

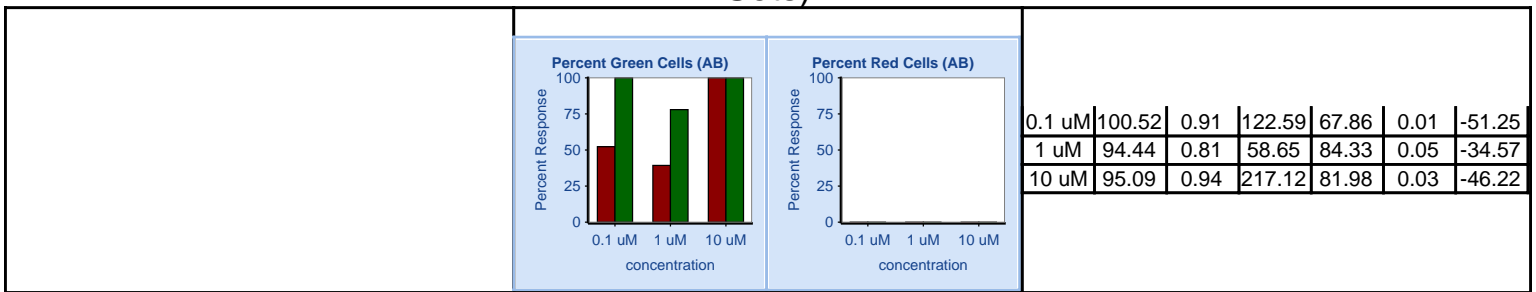

Compound

Normalized Values (A and B Sets)

Responses

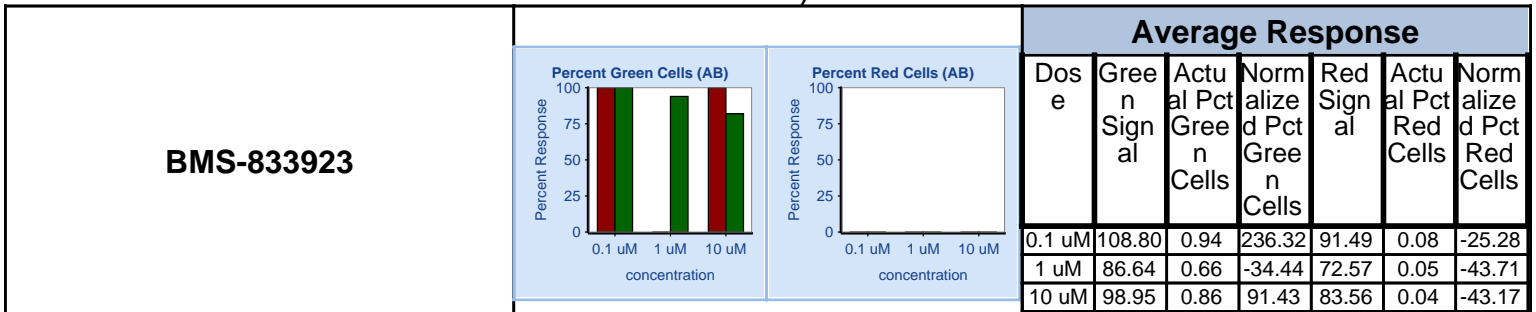

Compound

Normalized Values (A and B Sets)

Responses

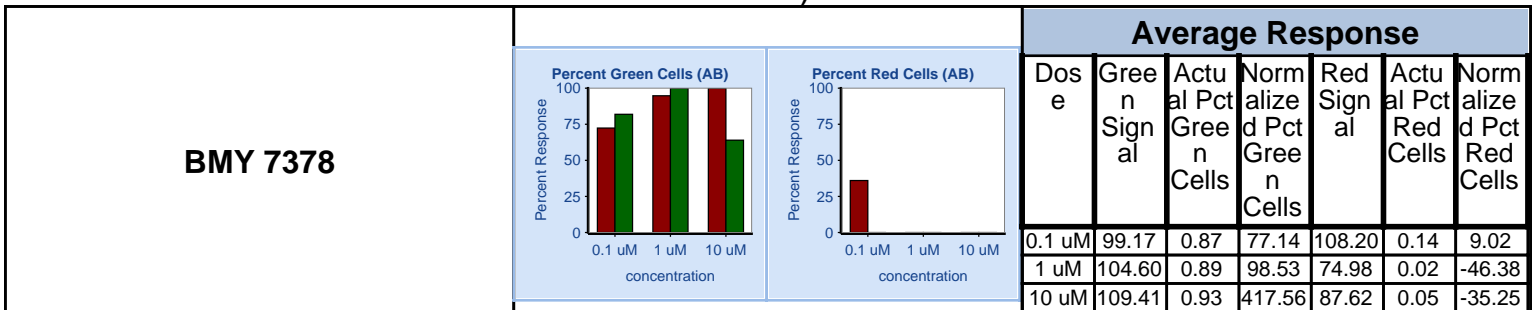

Compound

Normalized Values (A and B Sets)

Responses

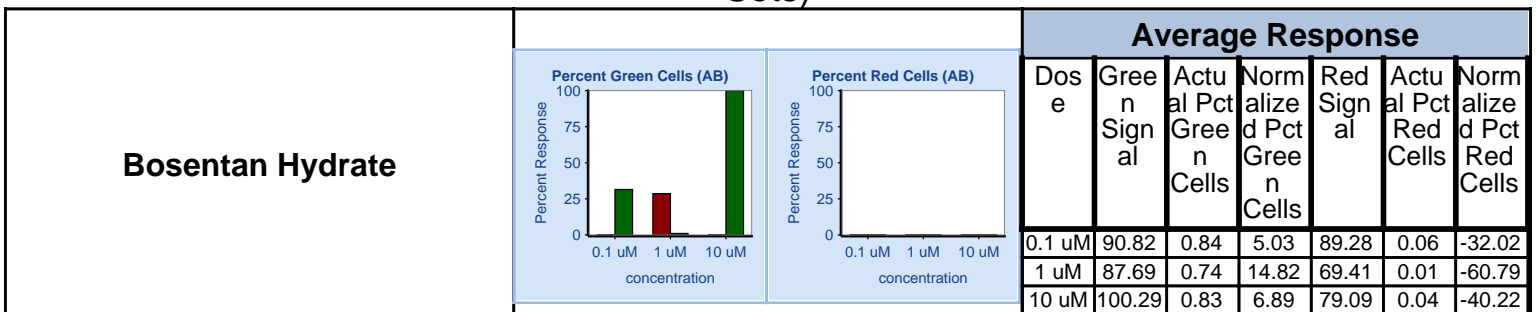

Compound

Normalized Values (A and B Sets)

Responses

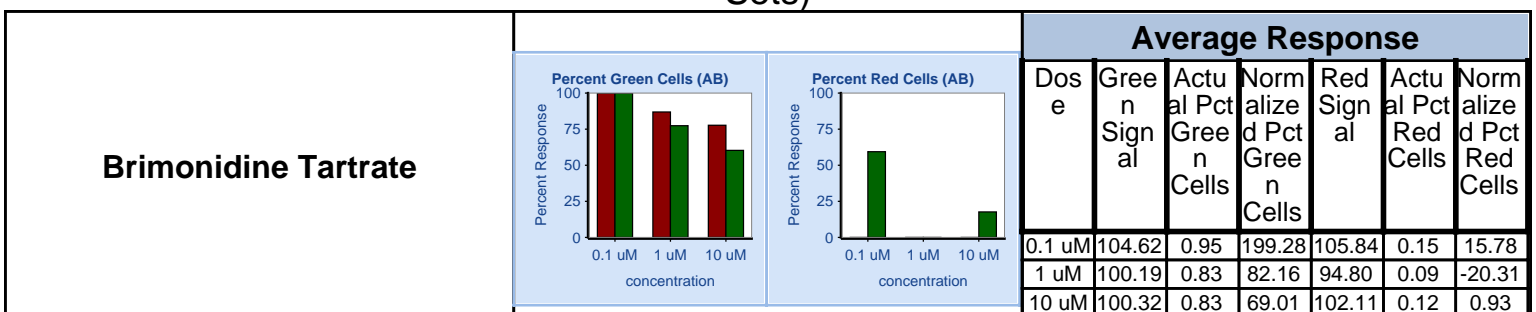

Brimonidine Tartrate

Compound

Normalized Values (A and B Sets)

Responses

|                                        |        |                         |              |                        |                            |            |                      |                          |
|----------------------------------------|--------|-------------------------|--------------|------------------------|----------------------------|------------|----------------------|--------------------------|
| <b>Brivanib Alaninate (BMS-582664)</b> |        | <b>Average Response</b> |              |                        |                            |            |                      |                          |
|                                        |        | Dose                    | Green Signal | Actual Pct Green Cells | Normalized Pct Green Cells | Red Signal | Actual Pct Red Cells | Normalized Pct Red Cells |
|                                        |        | 0.1 uM                  | 84.07        | 0.75                   | -65.63                     | 82.46      | 0.03                 | -56.90                   |
|                                        |        | 1 uM                    | 97.95        | 0.87                   | 95.95                      | 86.54      | 0.04                 | -40.17                   |
| 10 uM                                  | 107.34 | 0.91                    | 119.35       | 95.21                  | 0.03                       | -37.76     |                      |                          |

Compound

Normalized Values (A and B Sets)

Responses

|                  |       |                         |              |                        |                            |            |                      |                          |
|------------------|-------|-------------------------|--------------|------------------------|----------------------------|------------|----------------------|--------------------------|
| <b>BRL-15572</b> |       | <b>Average Response</b> |              |                        |                            |            |                      |                          |
|                  |       | Dose                    | Green Signal | Actual Pct Green Cells | Normalized Pct Green Cells | Red Signal | Actual Pct Red Cells | Normalized Pct Red Cells |
|                  |       | 0.1 uM                  | 96.26        | 0.88                   | 82.92                      | 78.72      | 0.04                 | -36.28                   |
|                  |       | 1 uM                    | 104.34       | 0.86                   | 79.80                      | 87.87      | 0.06                 | -29.18                   |
| 10 uM            | 96.87 | 0.88                    | -38.58       | 90.01                  | 0.06                       | -28.63     |                      |                          |

Compound

Normalized Values (A and B Sets)

Responses

|                  |       |                         |              |                        |                            |            |                      |                          |
|------------------|-------|-------------------------|--------------|------------------------|----------------------------|------------|----------------------|--------------------------|
| <b>BRL-54443</b> |       | <b>Average Response</b> |              |                        |                            |            |                      |                          |
|                  |       | Dose                    | Green Signal | Actual Pct Green Cells | Normalized Pct Green Cells | Red Signal | Actual Pct Red Cells | Normalized Pct Red Cells |
|                  |       | 0.1 uM                  | 95.11        | 0.88                   | 89.65                      | 84.74      | 0.04                 | -51.75                   |
|                  |       | 1 uM                    | 104.00       | 0.92                   | 126.71                     | 105.41     | 0.17                 | 24.22                    |
| 10 uM            | 91.53 | 0.81                    | 2.69         | 87.65                  | 0.09                       | -13.25     |                      |                          |

Compound

Normalized Values (A and B Sets)

Responses

|                         |       |                         |              |                        |                            |            |                      |                          |
|-------------------------|-------|-------------------------|--------------|------------------------|----------------------------|------------|----------------------|--------------------------|
| <b>Bromfenac Sodium</b> |       | <b>Average Response</b> |              |                        |                            |            |                      |                          |
|                         |       | Dose                    | Green Signal | Actual Pct Green Cells | Normalized Pct Green Cells | Red Signal | Actual Pct Red Cells | Normalized Pct Red Cells |
|                         |       | 0.1 uM                  | 90.05        | 0.84                   | 34.38                      | 75.90      | 0.04                 | -42.80                   |
|                         |       | 1 uM                    | 97.94        | 0.83                   | 81.87                      | 87.90      | 0.06                 | -35.14                   |
| 10 uM                   | 85.24 | 0.74                    | 19.97        | 77.50                  | 0.02                       | -50.67     |                      |                          |

Compound

Normalized Values (A and B Sets)

Responses

|                               |       |                         |              |                        |                            |            |                      |                          |
|-------------------------------|-------|-------------------------|--------------|------------------------|----------------------------|------------|----------------------|--------------------------|
| <b>Bromocriptine Mesylate</b> |       | <b>Average Response</b> |              |                        |                            |            |                      |                          |
|                               |       | Dose                    | Green Signal | Actual Pct Green Cells | Normalized Pct Green Cells | Red Signal | Actual Pct Red Cells | Normalized Pct Red Cells |
|                               |       | 0.1 uM                  | 103.99       | 0.93                   | 156.46                     | 76.14      | 0.03                 | -46.80                   |
|                               |       | 1 uM                    | 99.55        | 0.87                   | 107.87                     | 89.28      | 0.07                 | -31.98                   |
| 10 uM                         | 96.68 | 0.86                    | 117.28       | 97.00                  | 0.09                       | -17.49     |                      |                          |

Compound

Normalized Values (A and B Sets)

Responses

| Bromospirine |       |      | Average Response |              |                        |                            |            |                      |                          |
|--------------|-------|------|------------------|--------------|------------------------|----------------------------|------------|----------------------|--------------------------|
|              |       |      | Dose             | Green Signal | Actual Pct Green Cells | Normalized Pct Green Cells | Red Signal | Actual Pct Red Cells | Normalized Pct Red Cells |
|              |       |      | 0.1 uM           | 65.35        | 0.50                   | 227.89                     | 87.20      | 0.05                 | -39.74                   |
|              |       |      | 1 uM             | 83.89        | 0.76                   | 266.87                     | 86.24      | 0.07                 | -13.91                   |
| 10 uM        | 92.88 | 0.74 | -65.56           | 90.10        | 0.11                   | -2.01                      |            |                      |                          |

Compound

Normalized Values (A and B Sets)

Responses

| Brucine |       |      | Average Response |              |                        |                            |            |                      |                          |
|---------|-------|------|------------------|--------------|------------------------|----------------------------|------------|----------------------|--------------------------|
|         |       |      | Dose             | Green Signal | Actual Pct Green Cells | Normalized Pct Green Cells | Red Signal | Actual Pct Red Cells | Normalized Pct Red Cells |
|         |       |      | 0.1 uM           | 105.26       | 0.91                   | 143.51                     | 94.63      | 0.11                 | -7.22                    |
|         |       |      | 1 uM             | 94.26        | 0.78                   | 44.24                      | 68.40      | 0.03                 | -54.42                   |
| 10 uM   | 94.55 | 0.81 | 61.20            | 78.01        | 0.03                   | -50.05                     |            |                      |                          |

Compound

Normalized Values (A and B Sets)

Responses

| BS-181 HCl |       |      | Average Response |              |                        |                            |            |                      |                          |
|------------|-------|------|------------------|--------------|------------------------|----------------------------|------------|----------------------|--------------------------|
|            |       |      | Dose             | Green Signal | Actual Pct Green Cells | Normalized Pct Green Cells | Red Signal | Actual Pct Red Cells | Normalized Pct Red Cells |
|            |       |      | 0.1 uM           | 80.40        | 0.67                   | -85.52                     | 93.53      | 0.08                 | -28.19                   |
|            |       |      | 1 uM             | 110.13       | 0.90                   | 117.20                     | 88.48      | 0.06                 | -31.36                   |
| 10 uM      | 93.95 | 0.77 | 20.38            | 98.67        | 0.08                   | -19.30                     |            |                      |                          |

Compound

Normalized Values (A and B Sets)

Responses

| BTZ043 Racemate |       |      | Average Response |              |                        |                            |            |                      |                          |
|-----------------|-------|------|------------------|--------------|------------------------|----------------------------|------------|----------------------|--------------------------|
|                 |       |      | Dose             | Green Signal | Actual Pct Green Cells | Normalized Pct Green Cells | Red Signal | Actual Pct Red Cells | Normalized Pct Red Cells |
|                 |       |      | 0.1 uM           | 87.86        | 0.78                   | -38.03                     | 79.80      | 0.03                 | -56.42                   |
|                 |       |      | 1 uM             | 87.05        | 0.73                   | -30.70                     | 93.01      | 0.05                 | -32.93                   |
| 10 uM           | 92.44 | 0.81 | 51.39            | 84.15        | 0.02                   | -44.95                     |            |                      |                          |

Compound

Normalized Values (A and B Sets)

Responses

| Budesonide |       |      | Average Response |              |                        |                            |            |                      |                          |
|------------|-------|------|------------------|--------------|------------------------|----------------------------|------------|----------------------|--------------------------|
|            |       |      | Dose             | Green Signal | Actual Pct Green Cells | Normalized Pct Green Cells | Red Signal | Actual Pct Red Cells | Normalized Pct Red Cells |
|            |       |      | 0.1 uM           | 90.30        | 0.85                   | 17.43                      | 65.79      | 0.01                 | -67.17                   |
|            |       |      | 1 uM             | 86.90        | 0.74                   | -38.56                     | 83.59      | 0.03                 | -42.25                   |
| 10 uM      | 92.18 | 0.82 | 61.97            | 80.86        | 0.04                   | -37.05                     |            |                      |                          |

Compound

Normalized Values (A and B Sets)

Responses

| Butein | Percent Green Cells (AB) |  | Percent Red Cells (AB) |  | Average Response |              |                        |                            |            |                      |                          |
|--------|--------------------------|--|------------------------|--|------------------|--------------|------------------------|----------------------------|------------|----------------------|--------------------------|
|        | Percent Response         |  | Percent Response       |  | Dose             | Green Signal | Actual Pct Green Cells | Normalized Pct Green Cells | Red Signal | Actual Pct Red Cells | Normalized Pct Red Cells |
|        | 100                      |  | 100                    |  | 0.1 uM           | 112.35       | 0.94                   | 149.35                     | 103.46     | 0.19                 | 37.18                    |
|        | 0                        |  | 0                      |  | 1 uM             | 96.15        | 0.84                   | 134.64                     | 71.71      | 0.03                 | -32.92                   |
|        | 0.1 uM                   |  | 0.1 uM                 |  | 10 uM            | 102.25       | 0.91                   | 95.69                      | 85.53      | 0.07                 | -20.03                   |
|        | 1 uM                     |  | 1 uM                   |  |                  |              |                        |                            |            |                      |                          |
|        | 10 uM                    |  | 10 uM                  |  |                  |              |                        |                            |            |                      |                          |

Compound

Normalized Values (A and B Sets)

Responses

| BYL719 | Percent Green Cells (AB) |  | Percent Red Cells (AB) |  | Average Response |              |                        |                            |            |                      |                          |
|--------|--------------------------|--|------------------------|--|------------------|--------------|------------------------|----------------------------|------------|----------------------|--------------------------|
|        | Percent Response         |  | Percent Response       |  | Dose             | Green Signal | Actual Pct Green Cells | Normalized Pct Green Cells | Red Signal | Actual Pct Red Cells | Normalized Pct Red Cells |
|        | 100                      |  | 100                    |  | 0.1 uM           | 90.06        | 0.84                   | 37.76                      | 73.08      | 0.03                 | -43.20                   |
|        | 0                        |  | 0                      |  | 1 uM             | 84.02        | 0.64                   | -15.90                     | 77.09      | 0.04                 | -38.90                   |
|        | 0.1 uM                   |  | 0.1 uM                 |  | 10 uM            | 101.33       | 0.94                   | 329.19                     | 85.95      | 0.03                 | -41.91                   |
|        | 1 uM                     |  | 1 uM                   |  |                  |              |                        |                            |            |                      |                          |
|        | 10 uM                    |  | 10 uM                  |  |                  |              |                        |                            |            |                      |                          |

Compound

Normalized Values (A and B Sets)

Responses

| C 646 | Percent Green Cells (AB) |  | Percent Red Cells (AB) |  | Average Response |              |                        |                            |            |                      |                          |
|-------|--------------------------|--|------------------------|--|------------------|--------------|------------------------|----------------------------|------------|----------------------|--------------------------|
|       | Percent Response         |  | Percent Response       |  | Dose             | Green Signal | Actual Pct Green Cells | Normalized Pct Green Cells | Red Signal | Actual Pct Red Cells | Normalized Pct Red Cells |
|       | 100                      |  | 100                    |  | 0.1 uM           | 72.11        | 0.57                   | 190.00                     | 68.20      | 0.01                 | -67.06                   |
|       | 0                        |  | 0                      |  | 1 uM             | 107.03       | 0.89                   | 222.25                     | 74.14      | 0.03                 | -32.50                   |
|       | 0.1 uM                   |  | 0.1 uM                 |  | 10 uM            | 74.30        | 0.63                   | 180.06                     | 61.98      | 0.01                 | -47.88                   |
|       | 1 uM                     |  | 1 uM                   |  |                  |              |                        |                            |            |                      |                          |
|       | 10 uM                    |  | 10 uM                  |  |                  |              |                        |                            |            |                      |                          |

Compound

Normalized Values (A and B Sets)

Responses

| C646 | Percent Green Cells (AB) |  | Percent Red Cells (AB) |  | Average Response |              |                        |                            |            |                      |                          |
|------|--------------------------|--|------------------------|--|------------------|--------------|------------------------|----------------------------|------------|----------------------|--------------------------|
|      | Percent Response         |  | Percent Response       |  | Dose             | Green Signal | Actual Pct Green Cells | Normalized Pct Green Cells | Red Signal | Actual Pct Red Cells | Normalized Pct Red Cells |
|      | 100                      |  | 100                    |  | 0.1 uM           | 80.51        | 0.73                   | -41.82                     | 88.73      | 0.05                 | -46.20                   |
|      | 0                        |  | 0                      |  | 1 uM             | 85.40        | 0.77                   | 180.22                     | 73.52      | 0.04                 | -31.98                   |
|      | 0.1 uM                   |  | 0.1 uM                 |  | 10 uM            | 88.05        | 0.83                   | 17.18                      | 94.48      | 0.10                 | -5.78                    |
|      | 1 uM                     |  | 1 uM                   |  |                  |              |                        |                            |            |                      |                          |
|      | 10 uM                    |  | 10 uM                  |  |                  |              |                        |                            |            |                      |                          |

Compound

Normalized Values (A and B Sets)

Responses

| Cabozantinib (XL184, BMS-907351) | Percent Green Cells (AB) |  | Percent Red Cells (AB) |  | Average Response |              |                        |                            |            |                      |                          |
|----------------------------------|--------------------------|--|------------------------|--|------------------|--------------|------------------------|----------------------------|------------|----------------------|--------------------------|
|                                  | Percent Response         |  | Percent Response       |  | Dose             | Green Signal | Actual Pct Green Cells | Normalized Pct Green Cells | Red Signal | Actual Pct Red Cells | Normalized Pct Red Cells |
|                                  | 100                      |  | 100                    |  | 0.1 uM           | 104.24       | 0.91                   | 110.17                     | 101.30     | 0.10                 | -26.27                   |
|                                  | 0                        |  | 0                      |  | 1 uM             | 97.30        | 0.83                   | -1.26                      | 89.19      | 0.05                 | -32.40                   |
|                                  | 0.1 uM                   |  | 0.1 uM                 |  |                  |              |                        |                            |            |                      |                          |
|                                  | 1 uM                     |  | 1 uM                   |  |                  |              |                        |                            |            |                      |                          |
|                                  | 10 uM                    |  | 10 uM                  |  |                  |              |                        |                            |            |                      |                          |

| Compound | Normalized Values (A and B Sets) | Responses |       |      |       |        |      |      |
|----------|----------------------------------|-----------|-------|------|-------|--------|------|------|
|          |                                  | 10 uM     | 89.05 | 0.82 | 58.95 | 122.71 | 0.13 | 0.89 |

| Compound                           | Normalized Values (A and B Sets) | Responses               |              |                        |                            |            |                      |                          |        |
|------------------------------------|----------------------------------|-------------------------|--------------|------------------------|----------------------------|------------|----------------------|--------------------------|--------|
| <b>Cabozantinib malate (XL184)</b> |                                  | <b>Average Response</b> |              |                        |                            |            |                      |                          |        |
|                                    |                                  | Dose                    | Green Signal | Actual Pct Green Cells | Normalized Pct Green Cells | Red Signal | Actual Pct Red Cells | Normalized Pct Red Cells |        |
|                                    |                                  | 0.1 uM                  | 79.90        | 0.78                   | -                          | 132.14     | 60.00                | 0.01                     | -58.49 |
|                                    |                                  | 1 uM                    | 84.64        | 0.69                   | -32.35                     | 62.44      | 0.01                 | -62.47                   |        |
| 10 uM                              | 62.65                            | 0.34                    | -            | 572.16                 | 66.25                      | 0.01       | -57.43               |                          |        |

| Compound                             | Normalized Values (A and B Sets) | Responses               |              |                        |                            |            |                      |                          |
|--------------------------------------|----------------------------------|-------------------------|--------------|------------------------|----------------------------|------------|----------------------|--------------------------|
| <b>CAL-101 (Idelalisib, GS-1101)</b> |                                  | <b>Average Response</b> |              |                        |                            |            |                      |                          |
|                                      |                                  | Dose                    | Green Signal | Actual Pct Green Cells | Normalized Pct Green Cells | Red Signal | Actual Pct Red Cells | Normalized Pct Red Cells |
|                                      |                                  | 0.1 uM                  | 90.59        | 0.86                   | 60.29                      | 72.34      | 0.03                 | -42.81                   |
|                                      |                                  | 1 uM                    | 83.05        | 0.70                   | 3.57                       | 92.95      | 0.08                 | -22.49                   |
| 10 uM                                | 84.90                            | 0.85                    | -61.50       | 86.07                  | 0.03                       | -42.57     |                      |                          |

| Compound           | Normalized Values (A and B Sets) | Responses               |              |                        |                            |            |                      |                          |
|--------------------|----------------------------------|-------------------------|--------------|------------------------|----------------------------|------------|----------------------|--------------------------|
| <b>Calcifediol</b> |                                  | <b>Average Response</b> |              |                        |                            |            |                      |                          |
|                    |                                  | Dose                    | Green Signal | Actual Pct Green Cells | Normalized Pct Green Cells | Red Signal | Actual Pct Red Cells | Normalized Pct Red Cells |
|                    |                                  | 0.1 uM                  | 90.66        | 0.83                   | 46.27                      | 80.17      | 0.03                 | -58.66                   |
|                    |                                  | 1 uM                    | 84.02        | 0.75                   | -                          | 367.81     | 68.67                | 0.02                     |
| 10 uM              | 103.37                           | 0.93                    | 108.62       | 84.34                  | 0.12                       | 0.70       |                      |                          |

| Compound                  | Normalized Values (A and B Sets) | Responses               |              |                        |                            |            |                      |                          |
|---------------------------|----------------------------------|-------------------------|--------------|------------------------|----------------------------|------------|----------------------|--------------------------|
| <b>Calcium Gluceptate</b> |                                  | <b>Average Response</b> |              |                        |                            |            |                      |                          |
|                           |                                  | Dose                    | Green Signal | Actual Pct Green Cells | Normalized Pct Green Cells | Red Signal | Actual Pct Red Cells | Normalized Pct Red Cells |
|                           |                                  | 0.1 uM                  | 80.48        | 0.66                   | -37.76                     | 76.69      | 0.03                 | -46.24                   |
|                           |                                  | 1 uM                    | 86.98        | 0.69                   | -25.09                     | 70.73      | 0.04                 | -49.55                   |
| 10 uM                     | 82.39                            | 0.66                    | -            | 180.68                 | 84.03                      | 0.06       | -34.47               |                          |

| Compound                 | Normalized Values (A and B Sets) | Responses               |  |  |  |            |  |
|--------------------------|----------------------------------|-------------------------|--|--|--|------------|--|
| <b>Camostat Mesilate</b> |                                  | <b>Average Response</b> |  |  |  |            |  |
|                          |                                  | Dose                    |  |  |  | Red Signal |  |

Compound

Normalized Values (A and B Sets)

Responses

| Compound | Normalized Values (A and B Sets) |      | Average Response |              |                        |                            |            |                      |                          |
|----------|----------------------------------|------|------------------|--------------|------------------------|----------------------------|------------|----------------------|--------------------------|
|          |                                  |      | Dose             | Green Signal | Actual Pct Green Cells | Normalized Pct Green Cells | Red Signal | Actual Pct Red Cells | Normalized Pct Red Cells |
|          |                                  |      | 0.1 uM           | 86.14        | 0.85                   | -94.97                     | 73.44      | 0.01                 | -57.69                   |
|          |                                  |      | 1 uM             | 89.21        | 0.80                   | 54.09                      | 66.25      | 0.01                 | -62.85                   |
| 10 uM    | 87.96                            | 0.77 | -14.07           | 84.33        | 0.05                   | -35.43                     |            |                      |                          |

Compound

Normalized Values (A and B Sets)

Responses

| Compound | Normalized Values (A and B Sets) |      | Average Response |              |                        |                            |            |                      |                          |
|----------|----------------------------------|------|------------------|--------------|------------------------|----------------------------|------------|----------------------|--------------------------|
|          |                                  |      | Dose             | Green Signal | Actual Pct Green Cells | Normalized Pct Green Cells | Red Signal | Actual Pct Red Cells | Normalized Pct Red Cells |
|          |                                  |      | 0.1 uM           | 102.18       | 0.93                   | 135.87                     | 88.57      | 0.06                 | -24.69                   |
|          |                                  |      | 1 uM             | 86.96        | 0.73                   | 22.83                      | 81.12      | 0.03                 | -40.40                   |
| 10 uM    | 95.10                            | 0.91 | 363.42           | 86.35        | 0.04                   | -39.18                     |            |                      |                          |

Compound

Normalized Values (A and B Sets)

Responses

| Compound | Normalized Values (A and B Sets) |      | Average Response |              |                        |                            |            |                      |                          |
|----------|----------------------------------|------|------------------|--------------|------------------------|----------------------------|------------|----------------------|--------------------------|
|          |                                  |      | Dose             | Green Signal | Actual Pct Green Cells | Normalized Pct Green Cells | Red Signal | Actual Pct Red Cells | Normalized Pct Red Cells |
|          |                                  |      | 0.1 uM           | 104.90       | 0.92                   | 125.17                     | 85.66      | 0.05                 | -47.52                   |
|          |                                  |      | 1 uM             | 91.24        | 0.71                   | 202.40                     | 107.59     | 0.11                 | -6.74                    |
| 10 uM    | 99.20                            | 0.83 | 73.52            | 111.39       | 0.09                   | -12.11                     |            |                      |                          |

Compound

Normalized Values (A and B Sets)

Responses

| Compound | Normalized Values (A and B Sets) |      | Average Response |              |                        |                            |            |                      |                          |
|----------|----------------------------------|------|------------------|--------------|------------------------|----------------------------|------------|----------------------|--------------------------|
|          |                                  |      | Dose             | Green Signal | Actual Pct Green Cells | Normalized Pct Green Cells | Red Signal | Actual Pct Red Cells | Normalized Pct Red Cells |
|          |                                  |      | 0.1 uM           | 96.67        | 0.87                   | 76.63                      | 72.93      | 0.02                 | -63.93                   |
|          |                                  |      | 1 uM             | 100.08       | 0.86                   | 73.71                      | 85.60      | 0.03                 | -42.04                   |
| 10 uM    | 101.82                           | 0.86 | 85.89            | 105.64       | 0.07                   | -20.35                     |            |                      |                          |

Compound

Normalized Values (A and B Sets)

Responses

| Compound | Normalized Values (A and B Sets) |      | Average Response |              |                        |                            |            |                      |                          |
|----------|----------------------------------|------|------------------|--------------|------------------------|----------------------------|------------|----------------------|--------------------------|
|          |                                  |      | Dose             | Green Signal | Actual Pct Green Cells | Normalized Pct Green Cells | Red Signal | Actual Pct Red Cells | Normalized Pct Red Cells |
|          |                                  |      | 0.1 uM           | 68.51        | 0.60                   | 248.69                     | 79.81      | 0.04                 | -40.86                   |
|          |                                  |      | 1 uM             | 90.75        | 0.81                   | 58.33                      | 74.49      | 0.03                 | -50.63                   |
| 10 uM    | 83.23                            | 0.74 | -31.24           | 66.24        | 0.01                   | -56.21                     |            |                      |                          |

Carbazochrome sodium sulfonate (AC-17)



Compound

Normalized Values (A and B Sets)

Responses

| Carbenoxolone Sodium | Percent Green Cells (AB) |  | Percent Red Cells (AB) |  | Average Response |              |                        |                            |               |                      |                          |        |      |        |       |      |        |
|----------------------|--------------------------|--|------------------------|--|------------------|--------------|------------------------|----------------------------|---------------|----------------------|--------------------------|--------|------|--------|-------|------|--------|
|                      | Percent Response         |  | Percent Response       |  | Dose             | Green Signal | Actual Pct Green Cells | Normalized Pct Green Cells | Red Signal    | Actual Pct Red Cells | Normalized Pct Red Cells |        |      |        |       |      |        |
|                      | 100                      |  | 100                    |  | 0.1 uM           | 111.39       | 0.94                   | 217.05                     | 81.06         | 0.05                 | -38.99                   |        |      |        |       |      |        |
|                      | 0                        |  | 0                      |  | 1 uM             | 88.47        | 0.74                   | 4.76                       | 91.39         | 0.06                 | -36.64                   |        |      |        |       |      |        |
|                      | 0.1 uM                   |  | 1 uM                   |  | 10 uM            |              | concentration          |                            | concentration |                      | 10 uM                    | 100.43 | 0.85 | 104.94 | 93.76 | 0.07 | -25.12 |

Compound

Normalized Values (A and B Sets)

Responses

| Carboplatin | Percent Green Cells (AB) |  | Percent Red Cells (AB) |  | Average Response |              |                        |                            |               |                      |                          |       |      |       |        |      |       |
|-------------|--------------------------|--|------------------------|--|------------------|--------------|------------------------|----------------------------|---------------|----------------------|--------------------------|-------|------|-------|--------|------|-------|
|             | Percent Response         |  | Percent Response       |  | Dose             | Green Signal | Actual Pct Green Cells | Normalized Pct Green Cells | Red Signal    | Actual Pct Red Cells | Normalized Pct Red Cells |       |      |       |        |      |       |
|             | 100                      |  | 100                    |  | 0.1 uM           | 88.83        | 0.80                   | 20.46                      | 94.06         | 0.10                 | -12.81                   |       |      |       |        |      |       |
|             | 0                        |  | 0                      |  | 1 uM             | 86.31        | 0.75                   | 110.59                     | 92.79         | 0.10                 | -2.54                    |       |      |       |        |      |       |
|             | 0.1 uM                   |  | 1 uM                   |  | 10 uM            |              | concentration          |                            | concentration |                      | 10 uM                    | 97.24 | 0.92 | 97.59 | 106.51 | 0.22 | 45.21 |

Compound

Normalized Values (A and B Sets)

Responses

| Caspofungin Acetate | Percent Green Cells (AB) |  | Percent Red Cells (AB) |  | Average Response |              |                        |                            |               |                      |                                                                                                  |        |      |        |       |      |        |
|---------------------|--------------------------|--|------------------------|--|------------------|--------------|------------------------|----------------------------|---------------|----------------------|--------------------------------------------------------------------------------------------------|--------|------|--------|-------|------|--------|
|                     | Percent Response         |  | Percent Response       |  | Dose             | Green Signal | Actual Pct Green Cells | Normalized Pct Green Cells | Red Signal    | Actual Pct Red Cells | Normalized Pct Red Cells                                                                         |        |      |        |       |      |        |
|                     | 100                      |  | 100                    |  | 0.1 uM           | 98.04        | 0.87                   | 63.21                      | 91.58         | 0.10                 | -14.59                                                                                           |        |      |        |       |      |        |
|                     | 0                        |  | 0                      |  | 1 uM             | 84.56        | 0.68                   | -26.16                     | 89.55         | 0.07                 | -29.27                                                                                           |        |      |        |       |      |        |
|                     | 0.1 uM                   |  | 1 uM                   |  | 10 uM            |              | concentration          |                            | concentration |                      | 10 uM <td>103.59</td> <td>0.89</td> <td>130.07</td> <td>74.92</td> <td>0.03</td> <td>-50.33</td> | 103.59 | 0.89 | 130.07 | 74.92 | 0.03 | -50.33 |

Compound

Normalized Values (A and B Sets)

Responses

| Cathepsin Inhibitor 1 | Percent Green Cells (AB) |  | Percent Red Cells (AB) |  | Average Response |              |                        |                            |               |                      |                                                                                                   |        |      |        |       |                      |        |
|-----------------------|--------------------------|--|------------------------|--|------------------|--------------|------------------------|----------------------------|---------------|----------------------|---------------------------------------------------------------------------------------------------|--------|------|--------|-------|----------------------|--------|
|                       | Percent Response         |  | Percent Response       |  | Dose             | Green Signal | Actual Pct Green Cells | Normalized Pct Green Cells | Red Signal    | Actual Pct Red Cells | Normalized Pct Red Cells                                                                          |        |      |        |       |                      |        |
|                       | 100                      |  | 100                    |  | 0.1 uM           | 111.58       | 0.94                   | 144.45                     | 92.44         | 0.08                 | -19.34                                                                                            |        |      |        |       |                      |        |
|                       | 0                        |  | 0                      |  | 1 uM             | 103.67       | 0.85                   | 76.77                      | 83.66         | 0.05                 | -33.61                                                                                            |        |      |        |       |                      |        |
|                       | 0.1 uM                   |  | 1 uM                   |  | 10 uM            |              | concentration          |                            | concentration |                      | 10 uM <td>104.76</td> <td>0.93</td> <td>287.09</td> <td>94.15</td> <td>0.06 <td>-32.18</td> </td> | 104.76 | 0.93 | 287.09 | 94.15 | 0.06 <td>-32.18</td> | -32.18 |

Compound

Normalized Values (A and B Sets)

Responses

| CCG 50014 | Percent Green Cells (AB) |  | Percent Red Cells (AB) |  | Average Response |              |                        |                            |               |                      |                                                                                                 |       |      |        |       |      |        |
|-----------|--------------------------|--|------------------------|--|------------------|--------------|------------------------|----------------------------|---------------|----------------------|-------------------------------------------------------------------------------------------------|-------|------|--------|-------|------|--------|
|           | Percent Response         |  | Percent Response       |  | Dose             | Green Signal | Actual Pct Green Cells | Normalized Pct Green Cells | Red Signal    | Actual Pct Red Cells | Normalized Pct Red Cells                                                                        |       |      |        |       |      |        |
|           | 100                      |  | 100                    |  | 0.1 uM           | 88.54        | 0.85                   | 34.67                      | 81.15         | 0.04                 | -42.42                                                                                          |       |      |        |       |      |        |
|           | 0                        |  | 0                      |  | 1 uM             | 87.55        | 0.73                   | 10.48                      | 63.42         | 0.01                 | -63.95                                                                                          |       |      |        |       |      |        |
|           | 0.1 uM                   |  | 1 uM                   |  | 10 uM            |              | concentration          |                            | concentration |                      | 10 uM <td>88.30</td> <td>0.77</td> <td>-82.96</td> <td>61.09</td> <td>0.01</td> <td>-59.96</td> | 88.30 | 0.77 | -82.96 | 61.09 | 0.01 | -59.96 |

Compound

Normalized Values (A and B Sets)

Responses

| <b>CCT 018159</b> |       | Average Response |              |                        |                            |            |                      |                          |
|-------------------|-------|------------------|--------------|------------------------|----------------------------|------------|----------------------|--------------------------|
|                   |       | Dose             | Green Signal | Actual Pct Green Cells | Normalized Pct Green Cells | Red Signal | Actual Pct Red Cells | Normalized Pct Red Cells |
|                   |       | 0.1 uM           | 99.33        | 0.91                   | 118.60                     | 75.31      | 0.02                 | -65.57                   |
|                   |       | 1 uM             | 91.68        | 0.87                   | -15.33                     | 66.24      | 0.02                 | -40.76                   |
| 10 uM             | 97.66 | 0.93             | 112.34       | 80.42                  | 0.05                       | -29.24     |                      |                          |

Compound

Normalized Values (A and B Sets)

Responses

| <b>CCT128930</b> |        | Average Response |              |                        |                            |            |                      |                          |
|------------------|--------|------------------|--------------|------------------------|----------------------------|------------|----------------------|--------------------------|
|                  |        | Dose             | Green Signal | Actual Pct Green Cells | Normalized Pct Green Cells | Red Signal | Actual Pct Red Cells | Normalized Pct Red Cells |
|                  |        | 0.1 uM           | 114.88       | 0.96                   | 164.43                     | 102.91     | 0.14                 | 9.68                     |
|                  |        | 1 uM             | 113.37       | 0.95                   | 129.12                     | 99.24      | 0.12                 | -3.50                    |
| 10 uM            | 106.68 | 0.95             | 412.18       | 120.57                 | 0.15                       | 15.48      |                      |                          |

Compound

Normalized Values (A and B Sets)

Responses

| <b>CCT129202</b> |        | Average Response |              |                        |                            |            |                      |                          |
|------------------|--------|------------------|--------------|------------------------|----------------------------|------------|----------------------|--------------------------|
|                  |        | Dose             | Green Signal | Actual Pct Green Cells | Normalized Pct Green Cells | Red Signal | Actual Pct Red Cells | Normalized Pct Red Cells |
|                  |        | 0.1 uM           | 101.41       | 0.86                   | 75.38                      | 86.40      | 0.06                 | -39.00                   |
|                  |        | 1 uM             | 117.00       | 0.89                   | 96.74                      | 76.14      | 0.04                 | -39.80                   |
| 10 uM            | 108.20 | 0.87             | 95.50        | 104.94                 | 0.09                       | -16.32     |                      |                          |

Compound

Normalized Values (A and B Sets)

Responses

| <b>CCT137690</b> |        | Average Response |              |                        |                            |            |                      |                          |
|------------------|--------|------------------|--------------|------------------------|----------------------------|------------|----------------------|--------------------------|
|                  |        | Dose             | Green Signal | Actual Pct Green Cells | Normalized Pct Green Cells | Red Signal | Actual Pct Red Cells | Normalized Pct Red Cells |
|                  |        | 0.1 uM           | 95.36        | 0.83                   | 45.02                      | 111.06     | 0.15                 | 15.28                    |
|                  |        | 1 uM             | 99.23        | 0.84                   | 79.05                      | 95.37      | 0.09                 | -14.78                   |
| 10 uM            | 106.41 | 0.97             | 497.59       | 107.43                 | 0.13                       | 2.62       |                      |                          |

Compound

Normalized Values (A and B Sets)

Responses

| <b>CD 437</b> |        | Average Response |              |                        |                            |            |                      |                          |
|---------------|--------|------------------|--------------|------------------------|----------------------------|------------|----------------------|--------------------------|
|               |        | Dose             | Green Signal | Actual Pct Green Cells | Normalized Pct Green Cells | Red Signal | Actual Pct Red Cells | Normalized Pct Red Cells |
|               |        | 0.1 uM           | 81.73        | 0.73                   | -47.38                     | 77.71      | 0.03                 | -53.52                   |
|               |        | 1 uM             | 105.79       | 0.95                   | 263.64                     | 52.86      | 0.02                 | -38.71                   |
| 10 uM         | 112.77 | 0.91             | 93.72        | 93.81                  | 0.11                       | -1.46      |                      |                          |

| Compound     | Normalized Values (A and B Sets) | Responses                                                                                                                                                                                                                                                                                                                                                                                                                                                                                                                                                                                                                                                                      |                  |                        |                            |            |                      |                          |  |      |              |                        |                            |            |                      |                          |        |       |      |      |       |      |        |      |       |      |       |       |      |        |       |       |      |        |       |      |        |
|--------------|----------------------------------|--------------------------------------------------------------------------------------------------------------------------------------------------------------------------------------------------------------------------------------------------------------------------------------------------------------------------------------------------------------------------------------------------------------------------------------------------------------------------------------------------------------------------------------------------------------------------------------------------------------------------------------------------------------------------------|------------------|------------------------|----------------------------|------------|----------------------|--------------------------|--|------|--------------|------------------------|----------------------------|------------|----------------------|--------------------------|--------|-------|------|------|-------|------|--------|------|-------|------|-------|-------|------|--------|-------|-------|------|--------|-------|------|--------|
| <b>CDIBA</b> |                                  | <table border="1"> <thead> <tr> <th colspan="7">Average Response</th> </tr> <tr> <th>Dose</th> <th>Green Signal</th> <th>Actual Pct Green Cells</th> <th>Normalized Pct Green Cells</th> <th>Red Signal</th> <th>Actual Pct Red Cells</th> <th>Normalized Pct Red Cells</th> </tr> </thead> <tbody> <tr> <td>0.1 uM</td> <td>85.50</td> <td>0.78</td> <td>8.43</td> <td>83.10</td> <td>0.03</td> <td>-57.77</td> </tr> <tr> <td>1 uM</td> <td>94.56</td> <td>0.84</td> <td>56.44</td> <td>85.09</td> <td>0.05</td> <td>-19.21</td> </tr> <tr> <td>10 uM</td> <td>71.38</td> <td>0.65</td> <td>146.15</td> <td>65.64</td> <td>0.01</td> <td>-47.12</td> </tr> </tbody> </table> | Average Response |                        |                            |            |                      |                          |  | Dose | Green Signal | Actual Pct Green Cells | Normalized Pct Green Cells | Red Signal | Actual Pct Red Cells | Normalized Pct Red Cells | 0.1 uM | 85.50 | 0.78 | 8.43 | 83.10 | 0.03 | -57.77 | 1 uM | 94.56 | 0.84 | 56.44 | 85.09 | 0.05 | -19.21 | 10 uM | 71.38 | 0.65 | 146.15 | 65.64 | 0.01 | -47.12 |
|              |                                  | Average Response                                                                                                                                                                                                                                                                                                                                                                                                                                                                                                                                                                                                                                                               |                  |                        |                            |            |                      |                          |  |      |              |                        |                            |            |                      |                          |        |       |      |      |       |      |        |      |       |      |       |       |      |        |       |       |      |        |       |      |        |
|              |                                  | Dose                                                                                                                                                                                                                                                                                                                                                                                                                                                                                                                                                                                                                                                                           | Green Signal     | Actual Pct Green Cells | Normalized Pct Green Cells | Red Signal | Actual Pct Red Cells | Normalized Pct Red Cells |  |      |              |                        |                            |            |                      |                          |        |       |      |      |       |      |        |      |       |      |       |       |      |        |       |       |      |        |       |      |        |
|              |                                  | 0.1 uM                                                                                                                                                                                                                                                                                                                                                                                                                                                                                                                                                                                                                                                                         | 85.50            | 0.78                   | 8.43                       | 83.10      | 0.03                 | -57.77                   |  |      |              |                        |                            |            |                      |                          |        |       |      |      |       |      |        |      |       |      |       |       |      |        |       |       |      |        |       |      |        |
| 1 uM         | 94.56                            | 0.84                                                                                                                                                                                                                                                                                                                                                                                                                                                                                                                                                                                                                                                                           | 56.44            | 85.09                  | 0.05                       | -19.21     |                      |                          |  |      |              |                        |                            |            |                      |                          |        |       |      |      |       |      |        |      |       |      |       |       |      |        |       |       |      |        |       |      |        |
| 10 uM        | 71.38                            | 0.65                                                                                                                                                                                                                                                                                                                                                                                                                                                                                                                                                                                                                                                                           | 146.15           | 65.64                  | 0.01                       | -47.12     |                      |                          |  |      |              |                        |                            |            |                      |                          |        |       |      |      |       |      |        |      |       |      |       |       |      |        |       |       |      |        |       |      |        |

| Compound                  | Normalized Values (A and B Sets) | Responses                                                                                                                                                                                                                                                                                                                                                                                                                                                                                                                                                                                                                                                                           |                  |                        |                            |            |                      |                          |  |      |              |                        |                            |            |                      |                          |        |        |      |       |       |      |        |      |        |      |        |        |      |       |       |        |      |        |        |      |       |
|---------------------------|----------------------------------|-------------------------------------------------------------------------------------------------------------------------------------------------------------------------------------------------------------------------------------------------------------------------------------------------------------------------------------------------------------------------------------------------------------------------------------------------------------------------------------------------------------------------------------------------------------------------------------------------------------------------------------------------------------------------------------|------------------|------------------------|----------------------------|------------|----------------------|--------------------------|--|------|--------------|------------------------|----------------------------|------------|----------------------|--------------------------|--------|--------|------|-------|-------|------|--------|------|--------|------|--------|--------|------|-------|-------|--------|------|--------|--------|------|-------|
| <b>Cefditoren Pivoxil</b> |                                  | <table border="1"> <thead> <tr> <th colspan="7">Average Response</th> </tr> <tr> <th>Dose</th> <th>Green Signal</th> <th>Actual Pct Green Cells</th> <th>Normalized Pct Green Cells</th> <th>Red Signal</th> <th>Actual Pct Red Cells</th> <th>Normalized Pct Red Cells</th> </tr> </thead> <tbody> <tr> <td>0.1 uM</td> <td>100.39</td> <td>0.91</td> <td>93.51</td> <td>88.46</td> <td>0.05</td> <td>-46.85</td> </tr> <tr> <td>1 uM</td> <td>113.95</td> <td>0.93</td> <td>142.01</td> <td>121.73</td> <td>0.15</td> <td>10.72</td> </tr> <tr> <td>10 uM</td> <td>110.43</td> <td>0.90</td> <td>109.89</td> <td>114.35</td> <td>0.12</td> <td>-6.42</td> </tr> </tbody> </table> | Average Response |                        |                            |            |                      |                          |  | Dose | Green Signal | Actual Pct Green Cells | Normalized Pct Green Cells | Red Signal | Actual Pct Red Cells | Normalized Pct Red Cells | 0.1 uM | 100.39 | 0.91 | 93.51 | 88.46 | 0.05 | -46.85 | 1 uM | 113.95 | 0.93 | 142.01 | 121.73 | 0.15 | 10.72 | 10 uM | 110.43 | 0.90 | 109.89 | 114.35 | 0.12 | -6.42 |
|                           |                                  | Average Response                                                                                                                                                                                                                                                                                                                                                                                                                                                                                                                                                                                                                                                                    |                  |                        |                            |            |                      |                          |  |      |              |                        |                            |            |                      |                          |        |        |      |       |       |      |        |      |        |      |        |        |      |       |       |        |      |        |        |      |       |
|                           |                                  | Dose                                                                                                                                                                                                                                                                                                                                                                                                                                                                                                                                                                                                                                                                                | Green Signal     | Actual Pct Green Cells | Normalized Pct Green Cells | Red Signal | Actual Pct Red Cells | Normalized Pct Red Cells |  |      |              |                        |                            |            |                      |                          |        |        |      |       |       |      |        |      |        |      |        |        |      |       |       |        |      |        |        |      |       |
|                           |                                  | 0.1 uM                                                                                                                                                                                                                                                                                                                                                                                                                                                                                                                                                                                                                                                                              | 100.39           | 0.91                   | 93.51                      | 88.46      | 0.05                 | -46.85                   |  |      |              |                        |                            |            |                      |                          |        |        |      |       |       |      |        |      |        |      |        |        |      |       |       |        |      |        |        |      |       |
| 1 uM                      | 113.95                           | 0.93                                                                                                                                                                                                                                                                                                                                                                                                                                                                                                                                                                                                                                                                                | 142.01           | 121.73                 | 0.15                       | 10.72      |                      |                          |  |      |              |                        |                            |            |                      |                          |        |        |      |       |       |      |        |      |        |      |        |        |      |       |       |        |      |        |        |      |       |
| 10 uM                     | 110.43                           | 0.90                                                                                                                                                                                                                                                                                                                                                                                                                                                                                                                                                                                                                                                                                | 109.89           | 114.35                 | 0.12                       | -6.42      |                      |                          |  |      |              |                        |                            |            |                      |                          |        |        |      |       |       |      |        |      |        |      |        |        |      |       |       |        |      |        |        |      |       |

| Compound            | Normalized Values (A and B Sets) | Responses                                                                                                                                                                                                                                                                                                                                                                                                                                                                                                                                                                                                                                                                          |                  |                        |                            |            |                      |                          |  |      |              |                        |                            |            |                      |                          |        |       |      |       |       |      |        |      |        |      |       |       |      |        |       |        |      |        |        |      |        |
|---------------------|----------------------------------|------------------------------------------------------------------------------------------------------------------------------------------------------------------------------------------------------------------------------------------------------------------------------------------------------------------------------------------------------------------------------------------------------------------------------------------------------------------------------------------------------------------------------------------------------------------------------------------------------------------------------------------------------------------------------------|------------------|------------------------|----------------------------|------------|----------------------|--------------------------|--|------|--------------|------------------------|----------------------------|------------|----------------------|--------------------------|--------|-------|------|-------|-------|------|--------|------|--------|------|-------|-------|------|--------|-------|--------|------|--------|--------|------|--------|
| <b>Cefoperazone</b> |                                  | <table border="1"> <thead> <tr> <th colspan="7">Average Response</th> </tr> <tr> <th>Dose</th> <th>Green Signal</th> <th>Actual Pct Green Cells</th> <th>Normalized Pct Green Cells</th> <th>Red Signal</th> <th>Actual Pct Red Cells</th> <th>Normalized Pct Red Cells</th> </tr> </thead> <tbody> <tr> <td>0.1 uM</td> <td>96.52</td> <td>0.85</td> <td>39.08</td> <td>86.81</td> <td>0.04</td> <td>-49.46</td> </tr> <tr> <td>1 uM</td> <td>102.73</td> <td>0.86</td> <td>74.67</td> <td>94.99</td> <td>0.06</td> <td>-30.22</td> </tr> <tr> <td>10 uM</td> <td>108.51</td> <td>0.89</td> <td>110.51</td> <td>110.42</td> <td>0.09</td> <td>-14.94</td> </tr> </tbody> </table> | Average Response |                        |                            |            |                      |                          |  | Dose | Green Signal | Actual Pct Green Cells | Normalized Pct Green Cells | Red Signal | Actual Pct Red Cells | Normalized Pct Red Cells | 0.1 uM | 96.52 | 0.85 | 39.08 | 86.81 | 0.04 | -49.46 | 1 uM | 102.73 | 0.86 | 74.67 | 94.99 | 0.06 | -30.22 | 10 uM | 108.51 | 0.89 | 110.51 | 110.42 | 0.09 | -14.94 |
|                     |                                  | Average Response                                                                                                                                                                                                                                                                                                                                                                                                                                                                                                                                                                                                                                                                   |                  |                        |                            |            |                      |                          |  |      |              |                        |                            |            |                      |                          |        |       |      |       |       |      |        |      |        |      |       |       |      |        |       |        |      |        |        |      |        |
|                     |                                  | Dose                                                                                                                                                                                                                                                                                                                                                                                                                                                                                                                                                                                                                                                                               | Green Signal     | Actual Pct Green Cells | Normalized Pct Green Cells | Red Signal | Actual Pct Red Cells | Normalized Pct Red Cells |  |      |              |                        |                            |            |                      |                          |        |       |      |       |       |      |        |      |        |      |       |       |      |        |       |        |      |        |        |      |        |
|                     |                                  | 0.1 uM                                                                                                                                                                                                                                                                                                                                                                                                                                                                                                                                                                                                                                                                             | 96.52            | 0.85                   | 39.08                      | 86.81      | 0.04                 | -49.46                   |  |      |              |                        |                            |            |                      |                          |        |       |      |       |       |      |        |      |        |      |       |       |      |        |       |        |      |        |        |      |        |
| 1 uM                | 102.73                           | 0.86                                                                                                                                                                                                                                                                                                                                                                                                                                                                                                                                                                                                                                                                               | 74.67            | 94.99                  | 0.06                       | -30.22     |                      |                          |  |      |              |                        |                            |            |                      |                          |        |       |      |       |       |      |        |      |        |      |       |       |      |        |       |        |      |        |        |      |        |
| 10 uM               | 108.51                           | 0.89                                                                                                                                                                                                                                                                                                                                                                                                                                                                                                                                                                                                                                                                               | 110.51           | 110.42                 | 0.09                       | -14.94     |                      |                          |  |      |              |                        |                            |            |                      |                          |        |       |      |       |       |      |        |      |        |      |       |       |      |        |       |        |      |        |        |      |        |

| Compound                 | Normalized Values (A and B Sets) | Responses                                                                                                                                                                                                                                                                                                                                                                                                                                                                                                                                                                                                                                                                      |                  |                        |                            |            |                      |                          |  |      |              |                        |                            |            |                      |                          |        |       |      |       |       |      |        |      |       |      |       |       |      |        |       |       |      |       |       |      |        |
|--------------------------|----------------------------------|--------------------------------------------------------------------------------------------------------------------------------------------------------------------------------------------------------------------------------------------------------------------------------------------------------------------------------------------------------------------------------------------------------------------------------------------------------------------------------------------------------------------------------------------------------------------------------------------------------------------------------------------------------------------------------|------------------|------------------------|----------------------------|------------|----------------------|--------------------------|--|------|--------------|------------------------|----------------------------|------------|----------------------|--------------------------|--------|-------|------|-------|-------|------|--------|------|-------|------|-------|-------|------|--------|-------|-------|------|-------|-------|------|--------|
| <b>Cefoselis Sulfate</b> |                                  | <table border="1"> <thead> <tr> <th colspan="7">Average Response</th> </tr> <tr> <th>Dose</th> <th>Green Signal</th> <th>Actual Pct Green Cells</th> <th>Normalized Pct Green Cells</th> <th>Red Signal</th> <th>Actual Pct Red Cells</th> <th>Normalized Pct Red Cells</th> </tr> </thead> <tbody> <tr> <td>0.1 uM</td> <td>99.08</td> <td>0.86</td> <td>56.32</td> <td>74.78</td> <td>0.02</td> <td>-63.90</td> </tr> <tr> <td>1 uM</td> <td>85.75</td> <td>0.75</td> <td>-9.92</td> <td>90.34</td> <td>0.05</td> <td>-32.73</td> </tr> <tr> <td>10 uM</td> <td>85.39</td> <td>0.73</td> <td>-0.72</td> <td>83.13</td> <td>0.03</td> <td>-39.68</td> </tr> </tbody> </table> | Average Response |                        |                            |            |                      |                          |  | Dose | Green Signal | Actual Pct Green Cells | Normalized Pct Green Cells | Red Signal | Actual Pct Red Cells | Normalized Pct Red Cells | 0.1 uM | 99.08 | 0.86 | 56.32 | 74.78 | 0.02 | -63.90 | 1 uM | 85.75 | 0.75 | -9.92 | 90.34 | 0.05 | -32.73 | 10 uM | 85.39 | 0.73 | -0.72 | 83.13 | 0.03 | -39.68 |
|                          |                                  | Average Response                                                                                                                                                                                                                                                                                                                                                                                                                                                                                                                                                                                                                                                               |                  |                        |                            |            |                      |                          |  |      |              |                        |                            |            |                      |                          |        |       |      |       |       |      |        |      |       |      |       |       |      |        |       |       |      |       |       |      |        |
|                          |                                  | Dose                                                                                                                                                                                                                                                                                                                                                                                                                                                                                                                                                                                                                                                                           | Green Signal     | Actual Pct Green Cells | Normalized Pct Green Cells | Red Signal | Actual Pct Red Cells | Normalized Pct Red Cells |  |      |              |                        |                            |            |                      |                          |        |       |      |       |       |      |        |      |       |      |       |       |      |        |       |       |      |       |       |      |        |
|                          |                                  | 0.1 uM                                                                                                                                                                                                                                                                                                                                                                                                                                                                                                                                                                                                                                                                         | 99.08            | 0.86                   | 56.32                      | 74.78      | 0.02                 | -63.90                   |  |      |              |                        |                            |            |                      |                          |        |       |      |       |       |      |        |      |       |      |       |       |      |        |       |       |      |       |       |      |        |
| 1 uM                     | 85.75                            | 0.75                                                                                                                                                                                                                                                                                                                                                                                                                                                                                                                                                                                                                                                                           | -9.92            | 90.34                  | 0.05                       | -32.73     |                      |                          |  |      |              |                        |                            |            |                      |                          |        |       |      |       |       |      |        |      |       |      |       |       |      |        |       |       |      |       |       |      |        |
| 10 uM                    | 85.39                            | 0.73                                                                                                                                                                                                                                                                                                                                                                                                                                                                                                                                                                                                                                                                           | -0.72            | 83.13                  | 0.03                       | -39.68     |                      |                          |  |      |              |                        |                            |            |                      |                          |        |       |      |       |       |      |        |      |       |      |       |       |      |        |       |       |      |       |       |      |        |

| Compound                        | Normalized Values (A and B Sets) | Responses                                                                                                                                                                                                                                                                                                                                                                                                                                                                                                                                                                                                                                                                        |                  |                        |                            |            |                      |                          |  |      |              |                        |                            |            |                      |                          |        |       |      |        |       |      |        |      |        |      |       |       |      |        |       |       |      |       |       |      |        |
|---------------------------------|----------------------------------|----------------------------------------------------------------------------------------------------------------------------------------------------------------------------------------------------------------------------------------------------------------------------------------------------------------------------------------------------------------------------------------------------------------------------------------------------------------------------------------------------------------------------------------------------------------------------------------------------------------------------------------------------------------------------------|------------------|------------------------|----------------------------|------------|----------------------|--------------------------|--|------|--------------|------------------------|----------------------------|------------|----------------------|--------------------------|--------|-------|------|--------|-------|------|--------|------|--------|------|-------|-------|------|--------|-------|-------|------|-------|-------|------|--------|
| <b>Ceftazidime Pentahydrate</b> |                                  | <table border="1"> <thead> <tr> <th colspan="7">Average Response</th> </tr> <tr> <th>Dose</th> <th>Green Signal</th> <th>Actual Pct Green Cells</th> <th>Normalized Pct Green Cells</th> <th>Red Signal</th> <th>Actual Pct Red Cells</th> <th>Normalized Pct Red Cells</th> </tr> </thead> <tbody> <tr> <td>0.1 uM</td> <td>84.03</td> <td>0.74</td> <td>-14.02</td> <td>79.15</td> <td>0.05</td> <td>-39.64</td> </tr> <tr> <td>1 uM</td> <td>100.31</td> <td>0.83</td> <td>83.52</td> <td>83.61</td> <td>0.05</td> <td>-44.07</td> </tr> <tr> <td>10 uM</td> <td>88.14</td> <td>0.77</td> <td>26.04</td> <td>78.73</td> <td>0.03</td> <td>-47.08</td> </tr> </tbody> </table> | Average Response |                        |                            |            |                      |                          |  | Dose | Green Signal | Actual Pct Green Cells | Normalized Pct Green Cells | Red Signal | Actual Pct Red Cells | Normalized Pct Red Cells | 0.1 uM | 84.03 | 0.74 | -14.02 | 79.15 | 0.05 | -39.64 | 1 uM | 100.31 | 0.83 | 83.52 | 83.61 | 0.05 | -44.07 | 10 uM | 88.14 | 0.77 | 26.04 | 78.73 | 0.03 | -47.08 |
|                                 |                                  | Average Response                                                                                                                                                                                                                                                                                                                                                                                                                                                                                                                                                                                                                                                                 |                  |                        |                            |            |                      |                          |  |      |              |                        |                            |            |                      |                          |        |       |      |        |       |      |        |      |        |      |       |       |      |        |       |       |      |       |       |      |        |
|                                 |                                  | Dose                                                                                                                                                                                                                                                                                                                                                                                                                                                                                                                                                                                                                                                                             | Green Signal     | Actual Pct Green Cells | Normalized Pct Green Cells | Red Signal | Actual Pct Red Cells | Normalized Pct Red Cells |  |      |              |                        |                            |            |                      |                          |        |       |      |        |       |      |        |      |        |      |       |       |      |        |       |       |      |       |       |      |        |
|                                 |                                  | 0.1 uM                                                                                                                                                                                                                                                                                                                                                                                                                                                                                                                                                                                                                                                                           | 84.03            | 0.74                   | -14.02                     | 79.15      | 0.05                 | -39.64                   |  |      |              |                        |                            |            |                      |                          |        |       |      |        |       |      |        |      |        |      |       |       |      |        |       |       |      |       |       |      |        |
| 1 uM                            | 100.31                           | 0.83                                                                                                                                                                                                                                                                                                                                                                                                                                                                                                                                                                                                                                                                             | 83.52            | 83.61                  | 0.05                       | -44.07     |                      |                          |  |      |              |                        |                            |            |                      |                          |        |       |      |        |       |      |        |      |        |      |       |       |      |        |       |       |      |       |       |      |        |
| 10 uM                           | 88.14                            | 0.77                                                                                                                                                                                                                                                                                                                                                                                                                                                                                                                                                                                                                                                                             | 26.04            | 78.73                  | 0.03                       | -47.08     |                      |                          |  |      |              |                        |                            |            |                      |                          |        |       |      |        |       |      |        |      |        |      |       |       |      |        |       |       |      |       |       |      |        |

Compound

Normalized Values (A and B Sets)

Responses

| Ceftiofur HCl | Percent Green Cells (AB) |  | Percent Red Cells (AB) |  | Average Response |              |                        |                            |            |                      |                          |
|---------------|--------------------------|--|------------------------|--|------------------|--------------|------------------------|----------------------------|------------|----------------------|--------------------------|
|               | Percent Response         |  | Percent Response       |  | Dose             | Green Signal | Actual Pct Green Cells | Normalized Pct Green Cells | Red Signal | Actual Pct Red Cells | Normalized Pct Red Cells |
|               | 100                      |  | 100                    |  | 0.1 uM           | 95.61        | 0.88                   | 81.45                      | 114.06     | 0.18                 | 28.58                    |
|               | 0                        |  | 0                      |  | 1 uM             | 105.11       | 0.89                   | 98.13                      | 83.63      | 0.05                 | -33.57                   |
|               | 0.1 uM                   |  | 0.1 uM                 |  | 10 uM            | 111.94       | 0.95                   | 368.52                     | 82.71      | 0.04                 | -39.28                   |
|               | 1 uM                     |  | 1 uM                   |  |                  |              |                        |                            |            |                      |                          |
|               | 10 uM                    |  | 10 uM                  |  |                  |              |                        |                            |            |                      |                          |

Compound

Normalized Values (A and B Sets)

Responses

| CEP-18770 (Delanzomib) | Percent Green Cells (AB) |  | Percent Red Cells (AB) |  | Average Response |              |                        |                            |            |                      |                          |
|------------------------|--------------------------|--|------------------------|--|------------------|--------------|------------------------|----------------------------|------------|----------------------|--------------------------|
|                        | Percent Response         |  | Percent Response       |  | Dose             | Green Signal | Actual Pct Green Cells | Normalized Pct Green Cells | Red Signal | Actual Pct Red Cells | Normalized Pct Red Cells |
|                        | 100                      |  | 100                    |  | 0.1 uM           | 103.27       | 0.86                   | 94.50                      | 104.04     | 0.11                 | -12.41                   |
|                        | 0                        |  | 0                      |  | 1 uM             | 87.46        | 0.68                   | -58.02                     | 98.00      | 0.08                 | -22.24                   |
|                        | 0.1 uM                   |  | 0.1 uM                 |  | 10 uM            | 97.30        | 0.86                   | 91.03                      | 98.48      | 0.06                 | -28.97                   |
|                        | 1 uM                     |  | 1 uM                   |  |                  |              |                        |                            |            |                      |                          |
|                        | 10 uM                    |  | 10 uM                  |  |                  |              |                        |                            |            |                      |                          |

Compound

Normalized Values (A and B Sets)

Responses

| CEP-32496 | Percent Green Cells (AB) |  | Percent Red Cells (AB) |  | Average Response |              |                        |                            |            |                      |                          |
|-----------|--------------------------|--|------------------------|--|------------------|--------------|------------------------|----------------------------|------------|----------------------|--------------------------|
|           | Percent Response         |  | Percent Response       |  | Dose             | Green Signal | Actual Pct Green Cells | Normalized Pct Green Cells | Red Signal | Actual Pct Red Cells | Normalized Pct Red Cells |
|           | 100                      |  | 100                    |  | 0.1 uM           | 77.88        | 0.71                   | -67.67                     | 84.92      | 0.04                 | -51.14                   |
|           | 0                        |  | 0                      |  | 1 uM             | 85.04        | 0.75                   | 46.13                      | 74.88      | 0.04                 | -26.38                   |
|           | 0.1 uM                   |  | 0.1 uM                 |  | 10 uM            | 90.89        | 0.79                   | -12.75                     | 83.07      | 0.08                 | -15.65                   |
|           | 1 uM                     |  | 1 uM                   |  |                  |              |                        |                            |            |                      |                          |
|           | 10 uM                    |  | 10 uM                  |  |                  |              |                        |                            |            |                      |                          |

Compound

Normalized Values (A and B Sets)

Responses

| CEP-33779 | Percent Green Cells (AB) |  | Percent Red Cells (AB) |  | Average Response |              |                        |                            |            |                      |                          |
|-----------|--------------------------|--|------------------------|--|------------------|--------------|------------------------|----------------------------|------------|----------------------|--------------------------|
|           | Percent Response         |  | Percent Response       |  | Dose             | Green Signal | Actual Pct Green Cells | Normalized Pct Green Cells | Red Signal | Actual Pct Red Cells | Normalized Pct Red Cells |
|           | 100                      |  | 100                    |  | 0.1 uM           | 91.88        | 0.83                   | 30.58                      | 81.79      | 0.08                 | -15.87                   |
|           | 0                        |  | 0                      |  | 1 uM             | 82.71        | 0.62                   | -63.13                     | 81.64      | 0.05                 | -33.79                   |
|           | 0.1 uM                   |  | 0.1 uM                 |  | 10 uM            | 113.63       | 0.95                   | 266.57                     | 102.30     | 0.11                 | -5.34                    |
|           | 1 uM                     |  | 1 uM                   |  |                  |              |                        |                            |            |                      |                          |
|           | 10 uM                    |  | 10 uM                  |  |                  |              |                        |                            |            |                      |                          |

Compound

Normalized Values (A and B Sets)

Responses

| Cephalomannine | Percent Green Cells (AB) |  | Percent Red Cells (AB) |  | Average Response |              |                        |                            |            |                      |                          |
|----------------|--------------------------|--|------------------------|--|------------------|--------------|------------------------|----------------------------|------------|----------------------|--------------------------|
|                | Percent Response         |  | Percent Response       |  | Dose             | Green Signal | Actual Pct Green Cells | Normalized Pct Green Cells | Red Signal | Actual Pct Red Cells | Normalized Pct Red Cells |
|                | 100                      |  | 100                    |  | 0.1 uM           | 80.81        | 0.62                   | 167.93                     | 73.46      | 0.07                 | -22.48                   |
|                | 0                        |  | 0                      |  | 1 uM             | 99.08        | 0.78                   | 36.18                      | 85.60      | 0.07                 | -25.70                   |
|                | 0.1 uM                   |  | 0.1 uM                 |  | 10 uM            | 83.14        | 0.69                   |                            | 89.92      | 0.11                 | -5.88                    |
|                | 1 uM                     |  | 1 uM                   |  |                  |              |                        |                            |            |                      |                          |
|                | 10 uM                    |  | 10 uM                  |  |                  |              |                        |                            |            |                      |                          |



Compound

Normalized Values (A and B Sets)

Responses

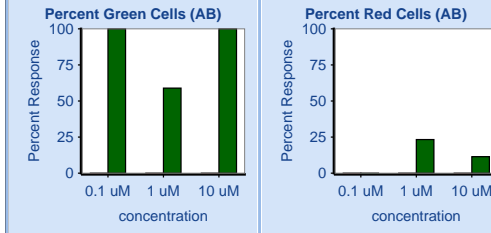

|        |        | Actual Pct Green Cells | Normalized Pct Green Cells |        |      | Normalized Pct Red Cells |
|--------|--------|------------------------|----------------------------|--------|------|--------------------------|
| 0.1 uM | 92.40  | 0.81                   | 26.26                      | 90.36  | 0.06 | -26.61                   |
| 1 uM   | 75.35  | 0.56                   | -53.39                     | 103.17 | 0.13 | 2.99                     |
| 10 uM  | 106.73 | 0.93                   | 91.28                      | 93.86  | 0.08 | -20.24                   |

Compound

Normalized Values (A and B Sets)

Responses

CHIR-124

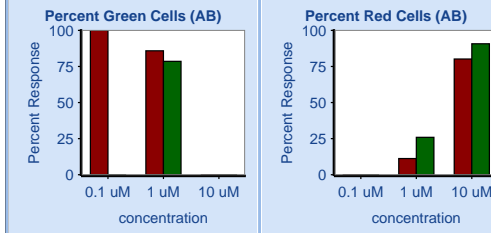

| Average Response |              |                        |                            |            |                      |                          |
|------------------|--------------|------------------------|----------------------------|------------|----------------------|--------------------------|
| Dose             | Green Signal | Actual Pct Green Cells | Normalized Pct Green Cells | Red Signal | Actual Pct Red Cells | Normalized Pct Red Cells |
| 0.1 uM           | 94.13        | 0.78                   | -34.87                     | 95.46      | 0.08                 | -16.54                   |
| 1 uM             | 116.57       | 0.86                   | 82.21                      | 113.26     | 0.17                 | 18.56                    |
| 10 uM            | 114.54       | 0.81                   | 163.36                     | 133.06     | 0.30                 | 85.46                    |

Compound

Normalized Values (A and B Sets)

Responses

CHIR-99021 (CT99021) HCl

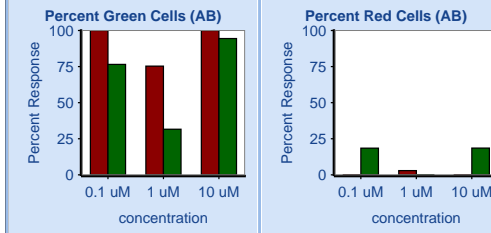

| Average Response |              |                        |                            |            |                      |                          |
|------------------|--------------|------------------------|----------------------------|------------|----------------------|--------------------------|
| Dose             | Green Signal | Actual Pct Green Cells | Normalized Pct Green Cells | Red Signal | Actual Pct Red Cells | Normalized Pct Red Cells |
| 0.1 uM           | 96.18        | 0.91                   | 212.14                     | 102.45     | 0.13                 | 4.83                     |
| 1 uM             | 95.64        | 0.80                   | 53.47                      | 97.63      | 0.10                 | -16.57                   |
| 10 uM            | 121.81       | 0.90                   | 143.01                     | 88.62      | 0.09                 | -16.21                   |

Compound

Normalized Values (A and B Sets)

Responses

Chlorprothixene

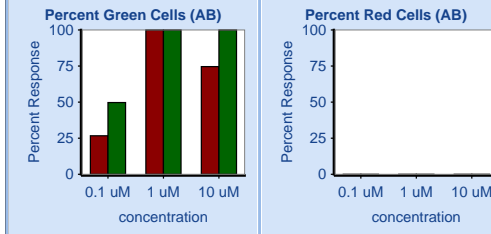

| Average Response |              |                        |                            |            |                      |                          |
|------------------|--------------|------------------------|----------------------------|------------|----------------------|--------------------------|
| Dose             | Green Signal | Actual Pct Green Cells | Normalized Pct Green Cells | Red Signal | Actual Pct Red Cells | Normalized Pct Red Cells |
| 0.1 uM           | 95.12        | 0.83                   | 38.20                      | 83.69      | 0.04                 | -54.59                   |
| 1 uM             | 114.34       | 0.93                   | 144.47                     | 91.45      | 0.05                 | -35.74                   |
| 10 uM            | 102.72       | 0.86                   | 91.06                      | 99.87      | 0.05                 | -32.67                   |

Compound

Normalized Values (A and B Sets)

Responses

CI994 (Tacedinaline)

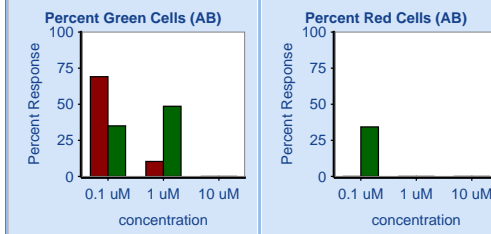

| Average Response |              |                        |                            |            |                      |                          |
|------------------|--------------|------------------------|----------------------------|------------|----------------------|--------------------------|
| Dose             | Green Signal | Actual Pct Green Cells | Normalized Pct Green Cells | Red Signal | Actual Pct Red Cells | Normalized Pct Red Cells |
| 0.1 uM           | 93.97        | 0.85                   | 52.07                      | 104.06     | 0.14                 | 13.76                    |
| 1 uM             | 87.15        | 0.75                   | 29.49                      | 74.69      | 0.03                 | -44.34                   |
| 10 uM            | 82.97        | 0.68                   | 348.58                     | 100.15     | 0.08                 | -19.04                   |

| Compound          | Normalized Values (A and B Sets) | Responses                                                                                                                                                                                                                                                                                                                                                                                                                                                                                                                                                                                                                                                                      |                  |                        |                            |            |                      |                          |  |      |              |                        |                            |            |                      |                          |        |       |      |       |       |      |        |      |       |      |        |       |      |        |       |       |      |       |       |      |       |
|-------------------|----------------------------------|--------------------------------------------------------------------------------------------------------------------------------------------------------------------------------------------------------------------------------------------------------------------------------------------------------------------------------------------------------------------------------------------------------------------------------------------------------------------------------------------------------------------------------------------------------------------------------------------------------------------------------------------------------------------------------|------------------|------------------------|----------------------------|------------|----------------------|--------------------------|--|------|--------------|------------------------|----------------------------|------------|----------------------|--------------------------|--------|-------|------|-------|-------|------|--------|------|-------|------|--------|-------|------|--------|-------|-------|------|-------|-------|------|-------|
| <b>Ciclopirox</b> |                                  | <table border="1"> <thead> <tr> <th colspan="7">Average Response</th> </tr> <tr> <th>Dose</th> <th>Green Signal</th> <th>Actual Pct Green Cells</th> <th>Normalized Pct Green Cells</th> <th>Red Signal</th> <th>Actual Pct Red Cells</th> <th>Normalized Pct Red Cells</th> </tr> </thead> <tbody> <tr> <td>0.1 uM</td> <td>91.16</td> <td>0.80</td> <td>29.03</td> <td>75.19</td> <td>0.03</td> <td>-58.77</td> </tr> <tr> <td>1 uM</td> <td>90.70</td> <td>0.84</td> <td>285.91</td> <td>79.49</td> <td>0.06</td> <td>-18.93</td> </tr> <tr> <td>10 uM</td> <td>98.93</td> <td>0.85</td> <td>36.18</td> <td>86.68</td> <td>0.11</td> <td>-4.94</td> </tr> </tbody> </table> | Average Response |                        |                            |            |                      |                          |  | Dose | Green Signal | Actual Pct Green Cells | Normalized Pct Green Cells | Red Signal | Actual Pct Red Cells | Normalized Pct Red Cells | 0.1 uM | 91.16 | 0.80 | 29.03 | 75.19 | 0.03 | -58.77 | 1 uM | 90.70 | 0.84 | 285.91 | 79.49 | 0.06 | -18.93 | 10 uM | 98.93 | 0.85 | 36.18 | 86.68 | 0.11 | -4.94 |
|                   |                                  | Average Response                                                                                                                                                                                                                                                                                                                                                                                                                                                                                                                                                                                                                                                               |                  |                        |                            |            |                      |                          |  |      |              |                        |                            |            |                      |                          |        |       |      |       |       |      |        |      |       |      |        |       |      |        |       |       |      |       |       |      |       |
|                   |                                  | Dose                                                                                                                                                                                                                                                                                                                                                                                                                                                                                                                                                                                                                                                                           | Green Signal     | Actual Pct Green Cells | Normalized Pct Green Cells | Red Signal | Actual Pct Red Cells | Normalized Pct Red Cells |  |      |              |                        |                            |            |                      |                          |        |       |      |       |       |      |        |      |       |      |        |       |      |        |       |       |      |       |       |      |       |
|                   |                                  | 0.1 uM                                                                                                                                                                                                                                                                                                                                                                                                                                                                                                                                                                                                                                                                         | 91.16            | 0.80                   | 29.03                      | 75.19      | 0.03                 | -58.77                   |  |      |              |                        |                            |            |                      |                          |        |       |      |       |       |      |        |      |       |      |        |       |      |        |       |       |      |       |       |      |       |
| 1 uM              | 90.70                            | 0.84                                                                                                                                                                                                                                                                                                                                                                                                                                                                                                                                                                                                                                                                           | 285.91           | 79.49                  | 0.06                       | -18.93     |                      |                          |  |      |              |                        |                            |            |                      |                          |        |       |      |       |       |      |        |      |       |      |        |       |      |        |       |       |      |       |       |      |       |
| 10 uM             | 98.93                            | 0.85                                                                                                                                                                                                                                                                                                                                                                                                                                                                                                                                                                                                                                                                           | 36.18            | 86.68                  | 0.11                       | -4.94      |                      |                          |  |      |              |                        |                            |            |                      |                          |        |       |      |       |       |      |        |      |       |      |        |       |      |        |       |       |      |       |       |      |       |

| Compound                      | Normalized Values (A and B Sets) | Responses                                                                                                                                                                                                                                                                                                                                                                                                                                                                                                                                                                                                                                                                       |                  |                        |                            |            |                      |                          |  |      |              |                        |                            |            |                      |                          |        |       |      |       |        |      |        |      |       |      |       |       |      |        |       |       |      |       |        |      |       |
|-------------------------------|----------------------------------|---------------------------------------------------------------------------------------------------------------------------------------------------------------------------------------------------------------------------------------------------------------------------------------------------------------------------------------------------------------------------------------------------------------------------------------------------------------------------------------------------------------------------------------------------------------------------------------------------------------------------------------------------------------------------------|------------------|------------------------|----------------------------|------------|----------------------|--------------------------|--|------|--------------|------------------------|----------------------------|------------|----------------------|--------------------------|--------|-------|------|-------|--------|------|--------|------|-------|------|-------|-------|------|--------|-------|-------|------|-------|--------|------|-------|
| <b>Cilazapril Monohydrate</b> |                                  | <table border="1"> <thead> <tr> <th colspan="7">Average Response</th> </tr> <tr> <th>Dose</th> <th>Green Signal</th> <th>Actual Pct Green Cells</th> <th>Normalized Pct Green Cells</th> <th>Red Signal</th> <th>Actual Pct Red Cells</th> <th>Normalized Pct Red Cells</th> </tr> </thead> <tbody> <tr> <td>0.1 uM</td> <td>93.05</td> <td>0.79</td> <td>22.16</td> <td>100.51</td> <td>0.10</td> <td>-14.94</td> </tr> <tr> <td>1 uM</td> <td>99.04</td> <td>0.85</td> <td>45.08</td> <td>99.03</td> <td>0.09</td> <td>-17.36</td> </tr> <tr> <td>10 uM</td> <td>90.35</td> <td>0.76</td> <td>17.54</td> <td>128.63</td> <td>0.18</td> <td>26.32</td> </tr> </tbody> </table> | Average Response |                        |                            |            |                      |                          |  | Dose | Green Signal | Actual Pct Green Cells | Normalized Pct Green Cells | Red Signal | Actual Pct Red Cells | Normalized Pct Red Cells | 0.1 uM | 93.05 | 0.79 | 22.16 | 100.51 | 0.10 | -14.94 | 1 uM | 99.04 | 0.85 | 45.08 | 99.03 | 0.09 | -17.36 | 10 uM | 90.35 | 0.76 | 17.54 | 128.63 | 0.18 | 26.32 |
|                               |                                  | Average Response                                                                                                                                                                                                                                                                                                                                                                                                                                                                                                                                                                                                                                                                |                  |                        |                            |            |                      |                          |  |      |              |                        |                            |            |                      |                          |        |       |      |       |        |      |        |      |       |      |       |       |      |        |       |       |      |       |        |      |       |
|                               |                                  | Dose                                                                                                                                                                                                                                                                                                                                                                                                                                                                                                                                                                                                                                                                            | Green Signal     | Actual Pct Green Cells | Normalized Pct Green Cells | Red Signal | Actual Pct Red Cells | Normalized Pct Red Cells |  |      |              |                        |                            |            |                      |                          |        |       |      |       |        |      |        |      |       |      |       |       |      |        |       |       |      |       |        |      |       |
|                               |                                  | 0.1 uM                                                                                                                                                                                                                                                                                                                                                                                                                                                                                                                                                                                                                                                                          | 93.05            | 0.79                   | 22.16                      | 100.51     | 0.10                 | -14.94                   |  |      |              |                        |                            |            |                      |                          |        |       |      |       |        |      |        |      |       |      |       |       |      |        |       |       |      |       |        |      |       |
| 1 uM                          | 99.04                            | 0.85                                                                                                                                                                                                                                                                                                                                                                                                                                                                                                                                                                                                                                                                            | 45.08            | 99.03                  | 0.09                       | -17.36     |                      |                          |  |      |              |                        |                            |            |                      |                          |        |       |      |       |        |      |        |      |       |      |       |       |      |        |       |       |      |       |        |      |       |
| 10 uM                         | 90.35                            | 0.76                                                                                                                                                                                                                                                                                                                                                                                                                                                                                                                                                                                                                                                                            | 17.54            | 128.63                 | 0.18                       | 26.32      |                      |                          |  |      |              |                        |                            |            |                      |                          |        |       |      |       |        |      |        |      |       |      |       |       |      |        |       |       |      |       |        |      |       |

| Compound           | Normalized Values (A and B Sets) | Responses                                                                                                                                                                                                                                                                                                                                                                                                                                                                                                                                                                                                                                                                          |                  |                        |                            |            |                      |                          |  |      |              |                        |                            |            |                      |                          |        |       |      |        |       |      |        |      |       |      |        |       |      |        |       |        |      |        |       |      |        |
|--------------------|----------------------------------|------------------------------------------------------------------------------------------------------------------------------------------------------------------------------------------------------------------------------------------------------------------------------------------------------------------------------------------------------------------------------------------------------------------------------------------------------------------------------------------------------------------------------------------------------------------------------------------------------------------------------------------------------------------------------------|------------------|------------------------|----------------------------|------------|----------------------|--------------------------|--|------|--------------|------------------------|----------------------------|------------|----------------------|--------------------------|--------|-------|------|--------|-------|------|--------|------|-------|------|--------|-------|------|--------|-------|--------|------|--------|-------|------|--------|
| <b>Cilengitide</b> |                                  | <table border="1"> <thead> <tr> <th colspan="7">Average Response</th> </tr> <tr> <th>Dose</th> <th>Green Signal</th> <th>Actual Pct Green Cells</th> <th>Normalized Pct Green Cells</th> <th>Red Signal</th> <th>Actual Pct Red Cells</th> <th>Normalized Pct Red Cells</th> </tr> </thead> <tbody> <tr> <td>0.1 uM</td> <td>96.76</td> <td>0.85</td> <td>-23.45</td> <td>78.02</td> <td>0.05</td> <td>-39.61</td> </tr> <tr> <td>1 uM</td> <td>85.10</td> <td>0.64</td> <td>-54.47</td> <td>88.04</td> <td>0.06</td> <td>-39.61</td> </tr> <tr> <td>10 uM</td> <td>112.52</td> <td>0.90</td> <td>137.63</td> <td>97.08</td> <td>0.10</td> <td>-10.65</td> </tr> </tbody> </table> | Average Response |                        |                            |            |                      |                          |  | Dose | Green Signal | Actual Pct Green Cells | Normalized Pct Green Cells | Red Signal | Actual Pct Red Cells | Normalized Pct Red Cells | 0.1 uM | 96.76 | 0.85 | -23.45 | 78.02 | 0.05 | -39.61 | 1 uM | 85.10 | 0.64 | -54.47 | 88.04 | 0.06 | -39.61 | 10 uM | 112.52 | 0.90 | 137.63 | 97.08 | 0.10 | -10.65 |
|                    |                                  | Average Response                                                                                                                                                                                                                                                                                                                                                                                                                                                                                                                                                                                                                                                                   |                  |                        |                            |            |                      |                          |  |      |              |                        |                            |            |                      |                          |        |       |      |        |       |      |        |      |       |      |        |       |      |        |       |        |      |        |       |      |        |
|                    |                                  | Dose                                                                                                                                                                                                                                                                                                                                                                                                                                                                                                                                                                                                                                                                               | Green Signal     | Actual Pct Green Cells | Normalized Pct Green Cells | Red Signal | Actual Pct Red Cells | Normalized Pct Red Cells |  |      |              |                        |                            |            |                      |                          |        |       |      |        |       |      |        |      |       |      |        |       |      |        |       |        |      |        |       |      |        |
|                    |                                  | 0.1 uM                                                                                                                                                                                                                                                                                                                                                                                                                                                                                                                                                                                                                                                                             | 96.76            | 0.85                   | -23.45                     | 78.02      | 0.05                 | -39.61                   |  |      |              |                        |                            |            |                      |                          |        |       |      |        |       |      |        |      |       |      |        |       |      |        |       |        |      |        |       |      |        |
| 1 uM               | 85.10                            | 0.64                                                                                                                                                                                                                                                                                                                                                                                                                                                                                                                                                                                                                                                                               | -54.47           | 88.04                  | 0.06                       | -39.61     |                      |                          |  |      |              |                        |                            |            |                      |                          |        |       |      |        |       |      |        |      |       |      |        |       |      |        |       |        |      |        |       |      |        |
| 10 uM              | 112.52                           | 0.90                                                                                                                                                                                                                                                                                                                                                                                                                                                                                                                                                                                                                                                                               | 137.63           | 97.08                  | 0.10                       | -10.65     |                      |                          |  |      |              |                        |                            |            |                      |                          |        |       |      |        |       |      |        |      |       |      |        |       |      |        |       |        |      |        |       |      |        |

| Compound          | Normalized Values (A and B Sets) | Responses                                                                                                                                                                                                                                                                                                                                                                                                                                                                                                                                                                                                                                                                         |                  |                        |                            |            |                      |                          |  |      |              |                        |                            |            |                      |                          |        |        |      |        |       |      |        |      |        |      |       |       |      |        |       |       |      |       |        |      |       |
|-------------------|----------------------------------|-----------------------------------------------------------------------------------------------------------------------------------------------------------------------------------------------------------------------------------------------------------------------------------------------------------------------------------------------------------------------------------------------------------------------------------------------------------------------------------------------------------------------------------------------------------------------------------------------------------------------------------------------------------------------------------|------------------|------------------------|----------------------------|------------|----------------------|--------------------------|--|------|--------------|------------------------|----------------------------|------------|----------------------|--------------------------|--------|--------|------|--------|-------|------|--------|------|--------|------|-------|-------|------|--------|-------|-------|------|-------|--------|------|-------|
| <b>Cilomilast</b> |                                  | <table border="1"> <thead> <tr> <th colspan="7">Average Response</th> </tr> <tr> <th>Dose</th> <th>Green Signal</th> <th>Actual Pct Green Cells</th> <th>Normalized Pct Green Cells</th> <th>Red Signal</th> <th>Actual Pct Red Cells</th> <th>Normalized Pct Red Cells</th> </tr> </thead> <tbody> <tr> <td>0.1 uM</td> <td>109.12</td> <td>0.92</td> <td>122.62</td> <td>96.43</td> <td>0.06</td> <td>-39.90</td> </tr> <tr> <td>1 uM</td> <td>102.60</td> <td>0.83</td> <td>61.80</td> <td>95.37</td> <td>0.08</td> <td>-22.54</td> </tr> <tr> <td>10 uM</td> <td>96.67</td> <td>0.85</td> <td>79.38</td> <td>124.08</td> <td>0.14</td> <td>13.22</td> </tr> </tbody> </table> | Average Response |                        |                            |            |                      |                          |  | Dose | Green Signal | Actual Pct Green Cells | Normalized Pct Green Cells | Red Signal | Actual Pct Red Cells | Normalized Pct Red Cells | 0.1 uM | 109.12 | 0.92 | 122.62 | 96.43 | 0.06 | -39.90 | 1 uM | 102.60 | 0.83 | 61.80 | 95.37 | 0.08 | -22.54 | 10 uM | 96.67 | 0.85 | 79.38 | 124.08 | 0.14 | 13.22 |
|                   |                                  | Average Response                                                                                                                                                                                                                                                                                                                                                                                                                                                                                                                                                                                                                                                                  |                  |                        |                            |            |                      |                          |  |      |              |                        |                            |            |                      |                          |        |        |      |        |       |      |        |      |        |      |       |       |      |        |       |       |      |       |        |      |       |
|                   |                                  | Dose                                                                                                                                                                                                                                                                                                                                                                                                                                                                                                                                                                                                                                                                              | Green Signal     | Actual Pct Green Cells | Normalized Pct Green Cells | Red Signal | Actual Pct Red Cells | Normalized Pct Red Cells |  |      |              |                        |                            |            |                      |                          |        |        |      |        |       |      |        |      |        |      |       |       |      |        |       |       |      |       |        |      |       |
|                   |                                  | 0.1 uM                                                                                                                                                                                                                                                                                                                                                                                                                                                                                                                                                                                                                                                                            | 109.12           | 0.92                   | 122.62                     | 96.43      | 0.06                 | -39.90                   |  |      |              |                        |                            |            |                      |                          |        |        |      |        |       |      |        |      |        |      |       |       |      |        |       |       |      |       |        |      |       |
| 1 uM              | 102.60                           | 0.83                                                                                                                                                                                                                                                                                                                                                                                                                                                                                                                                                                                                                                                                              | 61.80            | 95.37                  | 0.08                       | -22.54     |                      |                          |  |      |              |                        |                            |            |                      |                          |        |        |      |        |       |      |        |      |        |      |       |       |      |        |       |       |      |       |        |      |       |
| 10 uM             | 96.67                            | 0.85                                                                                                                                                                                                                                                                                                                                                                                                                                                                                                                                                                                                                                                                              | 79.38            | 124.08                 | 0.14                       | 13.22      |                      |                          |  |      |              |                        |                            |            |                      |                          |        |        |      |        |       |      |        |      |        |      |       |       |      |        |       |       |      |       |        |      |       |

| Compound              | Normalized Values (A and B Sets) | Responses                                                                                                                                                                                                                                                                                                                                                                                                                                                                                                                                                                                                                                                                         |                  |                        |                            |            |                      |                          |  |      |              |                        |                            |            |                      |                          |        |       |      |        |       |      |        |      |       |      |       |       |      |        |       |        |      |        |        |      |       |
|-----------------------|----------------------------------|-----------------------------------------------------------------------------------------------------------------------------------------------------------------------------------------------------------------------------------------------------------------------------------------------------------------------------------------------------------------------------------------------------------------------------------------------------------------------------------------------------------------------------------------------------------------------------------------------------------------------------------------------------------------------------------|------------------|------------------------|----------------------------|------------|----------------------|--------------------------|--|------|--------------|------------------------|----------------------------|------------|----------------------|--------------------------|--------|-------|------|--------|-------|------|--------|------|-------|------|-------|-------|------|--------|-------|--------|------|--------|--------|------|-------|
| <b>Cinacalcet HCl</b> |                                  | <table border="1"> <thead> <tr> <th colspan="7">Average Response</th> </tr> <tr> <th>Dose</th> <th>Green Signal</th> <th>Actual Pct Green Cells</th> <th>Normalized Pct Green Cells</th> <th>Red Signal</th> <th>Actual Pct Red Cells</th> <th>Normalized Pct Red Cells</th> </tr> </thead> <tbody> <tr> <td>0.1 uM</td> <td>81.29</td> <td>0.71</td> <td>-28.69</td> <td>92.27</td> <td>0.05</td> <td>-49.38</td> </tr> <tr> <td>1 uM</td> <td>95.43</td> <td>0.83</td> <td>63.94</td> <td>75.31</td> <td>0.01</td> <td>-51.19</td> </tr> <tr> <td>10 uM</td> <td>119.08</td> <td>0.91</td> <td>121.55</td> <td>121.71</td> <td>0.12</td> <td>-2.80</td> </tr> </tbody> </table> | Average Response |                        |                            |            |                      |                          |  | Dose | Green Signal | Actual Pct Green Cells | Normalized Pct Green Cells | Red Signal | Actual Pct Red Cells | Normalized Pct Red Cells | 0.1 uM | 81.29 | 0.71 | -28.69 | 92.27 | 0.05 | -49.38 | 1 uM | 95.43 | 0.83 | 63.94 | 75.31 | 0.01 | -51.19 | 10 uM | 119.08 | 0.91 | 121.55 | 121.71 | 0.12 | -2.80 |
|                       |                                  | Average Response                                                                                                                                                                                                                                                                                                                                                                                                                                                                                                                                                                                                                                                                  |                  |                        |                            |            |                      |                          |  |      |              |                        |                            |            |                      |                          |        |       |      |        |       |      |        |      |       |      |       |       |      |        |       |        |      |        |        |      |       |
|                       |                                  | Dose                                                                                                                                                                                                                                                                                                                                                                                                                                                                                                                                                                                                                                                                              | Green Signal     | Actual Pct Green Cells | Normalized Pct Green Cells | Red Signal | Actual Pct Red Cells | Normalized Pct Red Cells |  |      |              |                        |                            |            |                      |                          |        |       |      |        |       |      |        |      |       |      |       |       |      |        |       |        |      |        |        |      |       |
|                       |                                  | 0.1 uM                                                                                                                                                                                                                                                                                                                                                                                                                                                                                                                                                                                                                                                                            | 81.29            | 0.71                   | -28.69                     | 92.27      | 0.05                 | -49.38                   |  |      |              |                        |                            |            |                      |                          |        |       |      |        |       |      |        |      |       |      |       |       |      |        |       |        |      |        |        |      |       |
| 1 uM                  | 95.43                            | 0.83                                                                                                                                                                                                                                                                                                                                                                                                                                                                                                                                                                                                                                                                              | 63.94            | 75.31                  | 0.01                       | -51.19     |                      |                          |  |      |              |                        |                            |            |                      |                          |        |       |      |        |       |      |        |      |       |      |       |       |      |        |       |        |      |        |        |      |       |
| 10 uM                 | 119.08                           | 0.91                                                                                                                                                                                                                                                                                                                                                                                                                                                                                                                                                                                                                                                                              | 121.55           | 121.71                 | 0.12                       | -2.80      |                      |                          |  |      |              |                        |                            |            |                      |                          |        |       |      |        |       |      |        |      |       |      |       |       |      |        |       |        |      |        |        |      |       |



Compound

Normalized Values (A and B Sets)

Responses

| Cinchonidine | Percent Green Cells (AB) |      | Percent Red Cells (AB) |        | Average Response |              |                        |                            |            |                      |                          |       |       |
|--------------|--------------------------|------|------------------------|--------|------------------|--------------|------------------------|----------------------------|------------|----------------------|--------------------------|-------|-------|
|              | Percent Response         |      | Percent Response       |        | Dose             | Green Signal | Actual Pct Green Cells | Normalized Pct Green Cells | Red Signal | Actual Pct Red Cells | Normalized Pct Red Cells |       |       |
|              | concentration            |      | concentration          |        | 0.1 uM           | 1 uM         | 10 uM                  | 0.1 uM                     | 1 uM       | 10 uM                | 0.1 uM                   | 1 uM  | 10 uM |
|              | 0.1 uM                   | 1 uM | 10 uM                  | 0.1 uM | 1 uM             | 10 uM        | 0.1 uM                 | 1 uM                       | 10 uM      | 0.1 uM               | 1 uM                     | 10 uM |       |
|              | 100                      | 75   | 100                    | 100    | 100              | 100          | 100                    | 100                        | 25         | 0                    | 0                        | 0     |       |
|              | 82.02                    | 0.69 | 123.49                 | 93.36  | 0.10             | -9.10        |                        |                            |            |                      |                          |       |       |
|              | 101.53                   | 0.87 | 91.75                  | 82.52  | 0.03             | -40.46       |                        |                            |            |                      |                          |       |       |
|              | 107.33                   | 0.94 | 417.35                 | 76.67  | 0.02             | -48.05       |                        |                            |            |                      |                          |       |       |

Compound

Normalized Values (A and B Sets)

Responses

| Cinchophen | Percent Green Cells (AB) |      | Percent Red Cells (AB) |        | Average Response |              |                        |                            |            |                      |                          |       |       |
|------------|--------------------------|------|------------------------|--------|------------------|--------------|------------------------|----------------------------|------------|----------------------|--------------------------|-------|-------|
|            | Percent Response         |      | Percent Response       |        | Dose             | Green Signal | Actual Pct Green Cells | Normalized Pct Green Cells | Red Signal | Actual Pct Red Cells | Normalized Pct Red Cells |       |       |
|            | concentration            |      | concentration          |        | 0.1 uM           | 1 uM         | 10 uM                  | 0.1 uM                     | 1 uM       | 10 uM                | 0.1 uM                   | 1 uM  | 10 uM |
|            | 0.1 uM                   | 1 uM | 10 uM                  | 0.1 uM | 1 uM             | 10 uM        | 0.1 uM                 | 1 uM                       | 10 uM      | 0.1 uM               | 1 uM                     | 10 uM |       |
|            | 100                      | 75   | 100                    | 100    | 100              | 100          | 100                    | 100                        | 30         | 60                   | 20                       | 40    |       |
|            | 100.65                   | 0.90 | 109.13                 | 117.43 | 0.19             | 46.96        |                        |                            |            |                      |                          |       |       |
|            | 80.99                    | 0.65 | -23.98                 | 84.96  | 0.09             | -13.88       |                        |                            |            |                      |                          |       |       |
|            | 94.45                    | 0.88 | 64.15                  | 92.56  | 0.13             | 3.61         |                        |                            |            |                      |                          |       |       |

Compound

Normalized Values (A and B Sets)

Responses

| Cinepazide maleate | Percent Green Cells (AB) |      | Percent Red Cells (AB) |        | Average Response |              |                        |                            |            |                      |                          |       |       |
|--------------------|--------------------------|------|------------------------|--------|------------------|--------------|------------------------|----------------------------|------------|----------------------|--------------------------|-------|-------|
|                    | Percent Response         |      | Percent Response       |        | Dose             | Green Signal | Actual Pct Green Cells | Normalized Pct Green Cells | Red Signal | Actual Pct Red Cells | Normalized Pct Red Cells |       |       |
|                    | concentration            |      | concentration          |        | 0.1 uM           | 1 uM         | 10 uM                  | 0.1 uM                     | 1 uM       | 10 uM                | 0.1 uM                   | 1 uM  | 10 uM |
|                    | 0.1 uM                   | 1 uM | 10 uM                  | 0.1 uM | 1 uM             | 10 uM        | 0.1 uM                 | 1 uM                       | 10 uM      | 0.1 uM               | 1 uM                     | 10 uM |       |
|                    | 100                      | 75   | 100                    | 100    | 100              | 100          | 100                    | 100                        | 5          | 0                    | 0                        | 0     |       |
|                    | 105.52                   | 0.91 | 201.00                 | 82.21  | 0.08             | -24.36       |                        |                            |            |                      |                          |       |       |
|                    | 99.17                    | 0.83 | 80.69                  | 75.13  | 0.03             | -51.51       |                        |                            |            |                      |                          |       |       |
|                    | 96.49                    | 0.82 | 69.50                  | 73.97  | 0.02             | -51.15       |                        |                            |            |                      |                          |       |       |

Compound

Normalized Values (A and B Sets)

Responses

| Ciproxifan | Percent Green Cells (AB) |      | Percent Red Cells (AB) |        | Average Response |              |                        |                            |            |                      |                          |       |       |
|------------|--------------------------|------|------------------------|--------|------------------|--------------|------------------------|----------------------------|------------|----------------------|--------------------------|-------|-------|
|            | Percent Response         |      | Percent Response       |        | Dose             | Green Signal | Actual Pct Green Cells | Normalized Pct Green Cells | Red Signal | Actual Pct Red Cells | Normalized Pct Red Cells |       |       |
|            | concentration            |      | concentration          |        | 0.1 uM           | 1 uM         | 10 uM                  | 0.1 uM                     | 1 uM       | 10 uM                | 0.1 uM                   | 1 uM  | 10 uM |
|            | 0.1 uM                   | 1 uM | 10 uM                  | 0.1 uM | 1 uM             | 10 uM        | 0.1 uM                 | 1 uM                       | 10 uM      | 0.1 uM               | 1 uM                     | 10 uM |       |
|            | 45                       | 100  | 100                    | 100    | 100              | 100          | 100                    | 100                        | 55         | 0                    | 0                        | 0     |       |
|            | 103.96                   | 0.88 | 87.89                  | 99.02  | 0.14             | 8.67         |                        |                            |            |                      |                          |       |       |
|            | 75.45                    | 0.58 | -71.28                 | 83.67  | 0.05             | -34.30       |                        |                            |            |                      |                          |       |       |
|            | 94.23                    | 0.89 | 163.72                 | 100.89 | 0.07             | -23.25       |                        |                            |            |                      |                          |       |       |

Compound

Normalized Values (A and B Sets)

Responses

| Cisatracurium Besylate | Percent Green Cells (AB) |      | Percent Red Cells (AB) |        | Average Response |              |                        |                            |            |                      |                          |       |       |
|------------------------|--------------------------|------|------------------------|--------|------------------|--------------|------------------------|----------------------------|------------|----------------------|--------------------------|-------|-------|
|                        | Percent Response         |      | Percent Response       |        | Dose             | Green Signal | Actual Pct Green Cells | Normalized Pct Green Cells | Red Signal | Actual Pct Red Cells | Normalized Pct Red Cells |       |       |
|                        | concentration            |      | concentration          |        | 0.1 uM           | 1 uM         | 10 uM                  | 0.1 uM                     | 1 uM       | 10 uM                | 0.1 uM                   | 1 uM  | 10 uM |
|                        | 0.1 uM                   | 1 uM | 10 uM                  | 0.1 uM | 1 uM             | 10 uM        | 0.1 uM                 | 1 uM                       | 10 uM      | 0.1 uM               | 1 uM                     | 10 uM |       |
|                        | 100                      | 100  | 100                    | 100    | 100              | 100          | 100                    | 100                        | 0          | 0                    | 0                        | 0     |       |
|                        | 95.41                    | 0.85 | 67.92                  | 60.56  | 0.00             | -72.73       |                        |                            |            |                      |                          |       |       |
|                        | 105.95                   | 0.94 | 196.32                 | 95.64  | 0.09             | -2.58        |                        |                            |            |                      |                          |       |       |
|                        | 107.85                   | 0.94 | 119.77                 | 87.28  | 0.08             | -15.43       |                        |                            |            |                      |                          |       |       |

Compound

Normalized Values (A and B Sets)

Responses

| Cisplatin |        |      | Average Response |              |                        |                            |            |                      |                          |
|-----------|--------|------|------------------|--------------|------------------------|----------------------------|------------|----------------------|--------------------------|
|           |        |      | Dose             | Green Signal | Actual Pct Green Cells | Normalized Pct Green Cells | Red Signal | Actual Pct Red Cells | Normalized Pct Red Cells |
|           |        |      | 0.1 uM           | 102.65       | 0.88                   | 92.64                      | 75.19      | 0.02                 | -62.78                   |
|           |        |      | 1 uM             | 82.84        | 0.69                   | 157.87                     | 67.10      | 0.02                 | -48.58                   |
| 10 uM     | 107.13 | 0.90 | 115.74           | 104.23       | 0.08                   | -19.45                     |            |                      |                          |

Compound

Normalized Values (A and B Sets)

Responses

| Clevidipine Butyrate |        |      | Average Response |              |                        |                            |            |                      |                          |
|----------------------|--------|------|------------------|--------------|------------------------|----------------------------|------------|----------------------|--------------------------|
|                      |        |      | Dose             | Green Signal | Actual Pct Green Cells | Normalized Pct Green Cells | Red Signal | Actual Pct Red Cells | Normalized Pct Red Cells |
|                      |        |      | 0.1 uM           | 74.85        | 0.59                   | 262.24                     | 96.31      | 0.09                 | -26.18                   |
|                      |        |      | 1 uM             | 97.18        | 0.84                   | 28.31                      | 94.76      | 0.07                 | -25.92                   |
| 10 uM                | 109.89 | 0.88 | 97.22            | 83.79        | 0.04                   | -35.50                     |            |                      |                          |

Compound

Normalized Values (A and B Sets)

Responses

| Clevudine |       |      | Average Response |              |                        |                            |            |                      |                          |
|-----------|-------|------|------------------|--------------|------------------------|----------------------------|------------|----------------------|--------------------------|
|           |       |      | Dose             | Green Signal | Actual Pct Green Cells | Normalized Pct Green Cells | Red Signal | Actual Pct Red Cells | Normalized Pct Red Cells |
|           |       |      | 0.1 uM           | 92.32        | 0.88                   | -19.57                     | 87.15      | 0.08                 | -22.41                   |
|           |       |      | 1 uM             | 71.34        | 0.52                   | 156.69                     | 77.21      | 0.04                 | -48.39                   |
| 10 uM     | 74.79 | 0.58 | -75.45           | 67.04        | 0.05                   | -39.42                     |            |                      |                          |

Compound

Normalized Values (A and B Sets)

Responses

| Climbazole |       |      | Average Response |              |                        |                            |            |                      |                          |
|------------|-------|------|------------------|--------------|------------------------|----------------------------|------------|----------------------|--------------------------|
|            |       |      | Dose             | Green Signal | Actual Pct Green Cells | Normalized Pct Green Cells | Red Signal | Actual Pct Red Cells | Normalized Pct Red Cells |
|            |       |      | 0.1 uM           | 94.26        | 0.85                   | 61.66                      | 76.25      | 0.02                 | -61.14                   |
|            |       |      | 1 uM             | 90.32        | 0.84                   | 27.06                      | 78.27      | 0.03                 | -35.16                   |
| 10 uM      | 96.67 | 0.88 | 59.41            | 82.74        | 0.05                   | -28.02                     |            |                      |                          |

Compound

Normalized Values (A and B Sets)

Responses

| Clinafoxacin HCl |       |      | Average Response |              |                        |                            |            |                      |                          |
|------------------|-------|------|------------------|--------------|------------------------|----------------------------|------------|----------------------|--------------------------|
|                  |       |      | Dose             | Green Signal | Actual Pct Green Cells | Normalized Pct Green Cells | Red Signal | Actual Pct Red Cells | Normalized Pct Red Cells |
|                  |       |      | 0.1 uM           | 101.70       | 0.91                   | 36.97                      | 93.56      | 0.10                 | -12.59                   |
| 1 uM             | 88.90 | 0.73 | 6.64             | 112.39       | 0.17                   | 19.86                      |            |                      |                          |

| Compound | Normalized Values (A and B Sets) | Responses |       |      |       |        |      |      |
|----------|----------------------------------|-----------|-------|------|-------|--------|------|------|
|          |                                  | 10 uM     | 92.61 | 0.83 | 41.91 | 104.49 | 0.12 | 0.61 |

| Compound           | Normalized Values (A and B Sets) | Responses               |              |                        |                            |            |                      |                          |
|--------------------|----------------------------------|-------------------------|--------------|------------------------|----------------------------|------------|----------------------|--------------------------|
| <b>Clindamycin</b> |                                  | <b>Average Response</b> |              |                        |                            |            |                      |                          |
|                    |                                  | Dose                    | Green Signal | Actual Pct Green Cells | Normalized Pct Green Cells | Red Signal | Actual Pct Red Cells | Normalized Pct Red Cells |
|                    |                                  | 0.1 uM                  | 107.97       | 0.91                   | 110.59                     | 98.36      | 0.13                 | 1.46                     |
|                    |                                  | 1 uM                    | 104.10       | 0.90                   | 97.15                      | 76.83      | 0.02                 | -45.25                   |
| 10 uM              | 98.22                            | 0.89                    | 171.06       | 85.68                  | 0.04                       | -38.07     |                      |                          |

| Compound               | Normalized Values (A and B Sets) | Responses               |              |                        |                            |            |                      |                          |
|------------------------|----------------------------------|-------------------------|--------------|------------------------|----------------------------|------------|----------------------|--------------------------|
| <b>Clindamycin HCl</b> |                                  | <b>Average Response</b> |              |                        |                            |            |                      |                          |
|                        |                                  | Dose                    | Green Signal | Actual Pct Green Cells | Normalized Pct Green Cells | Red Signal | Actual Pct Red Cells | Normalized Pct Red Cells |
|                        |                                  | 0.1 uM                  | 93.03        | 0.83                   | 35.17                      | 86.51      | 0.05                 | -28.29                   |
|                        |                                  | 1 uM                    | 92.97        | 0.79                   | 42.38                      | 96.79      | 0.08                 | -19.76                   |
| 10 uM                  | 99.24                            | 0.88                    | 15.97        | 100.40                 | 0.08                       | -17.83     |                      |                          |

| Compound                         | Normalized Values (A and B Sets) | Responses               |              |                        |                            |            |                      |                          |
|----------------------------------|----------------------------------|-------------------------|--------------|------------------------|----------------------------|------------|----------------------|--------------------------|
| <b>Clindamycin palmitate HCl</b> |                                  | <b>Average Response</b> |              |                        |                            |            |                      |                          |
|                                  |                                  | Dose                    | Green Signal | Actual Pct Green Cells | Normalized Pct Green Cells | Red Signal | Actual Pct Red Cells | Normalized Pct Red Cells |
|                                  |                                  | 0.1 uM                  | 92.67        | 0.84                   | 44.93                      | 81.75      | 0.04                 | -34.50                   |
|                                  |                                  | 1 uM                    | 94.55        | 0.81                   | 54.79                      | 94.52      | 0.10                 | -12.63                   |
| 10 uM                            | 96.61                            | 0.87                    | 272.53       | 96.63                  | 0.09                       | -18.02     |                      |                          |

| Compound            | Normalized Values (A and B Sets) | Responses               |              |                        |                            |            |                      |                          |
|---------------------|----------------------------------|-------------------------|--------------|------------------------|----------------------------|------------|----------------------|--------------------------|
| <b>Clinofibrate</b> |                                  | <b>Average Response</b> |              |                        |                            |            |                      |                          |
|                     |                                  | Dose                    | Green Signal | Actual Pct Green Cells | Normalized Pct Green Cells | Red Signal | Actual Pct Red Cells | Normalized Pct Red Cells |
|                     |                                  | 0.1 uM                  | 94.83        | 0.86                   | 69.21                      | 87.95      | 0.05                 | -32.04                   |
|                     |                                  | 1 uM                    | 89.55        | 0.75                   | 28.14                      | 89.64      | 0.06                 | -28.30                   |
| 10 uM               | 97.02                            | 0.92                    | 265.80       | 80.18                  | 0.03                       | -46.16     |                      |                          |

| Compound           | Normalized Values (A and B Sets) | Responses               |              |                        |                            |            |                      |
|--------------------|----------------------------------|-------------------------|--------------|------------------------|----------------------------|------------|----------------------|
| <b>Clofarabine</b> |                                  | <b>Average Response</b> |              |                        |                            |            |                      |
|                    |                                  | Dose                    | Green Signal | Actual Pct Green Cells | Normalized Pct Green Cells | Red Signal | Actual Pct Red Cells |

Compound

Normalized Values (A and B Sets)

Responses

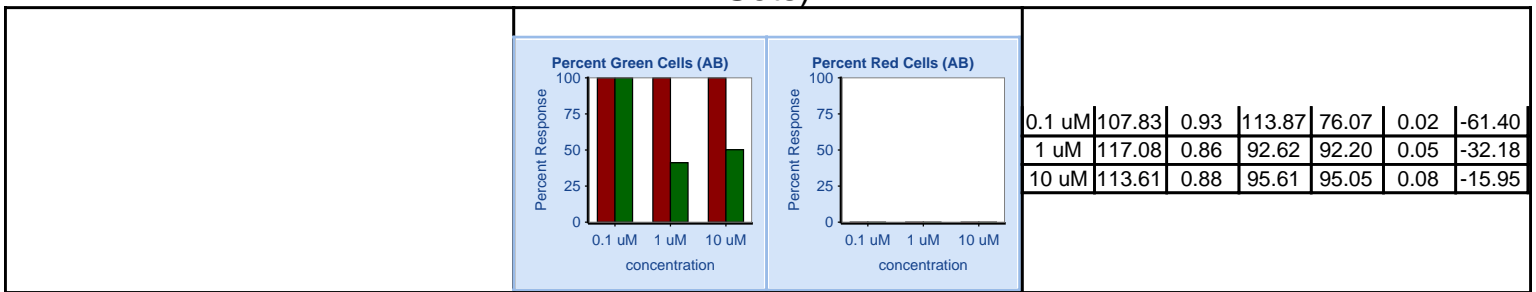

Compound

Normalized Values (A and B Sets)

Responses

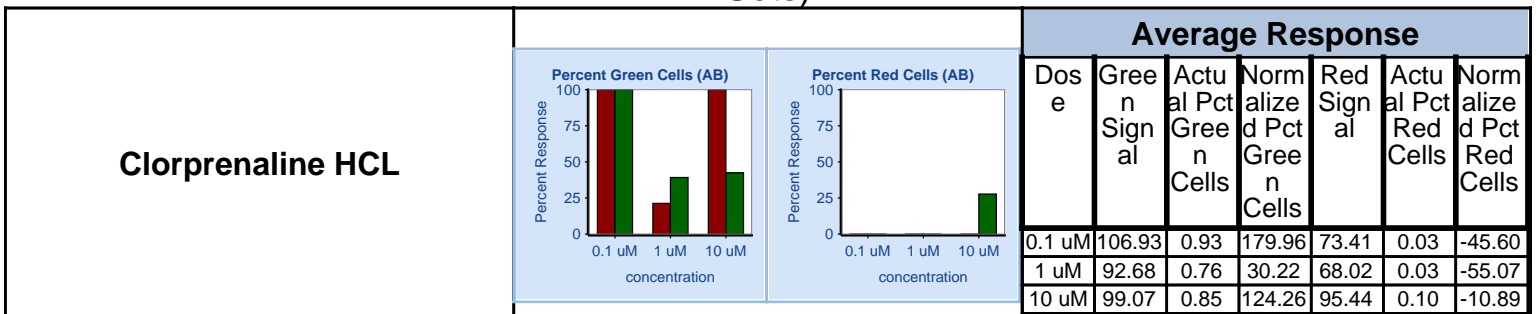

Compound

Normalized Values (A and B Sets)

Responses

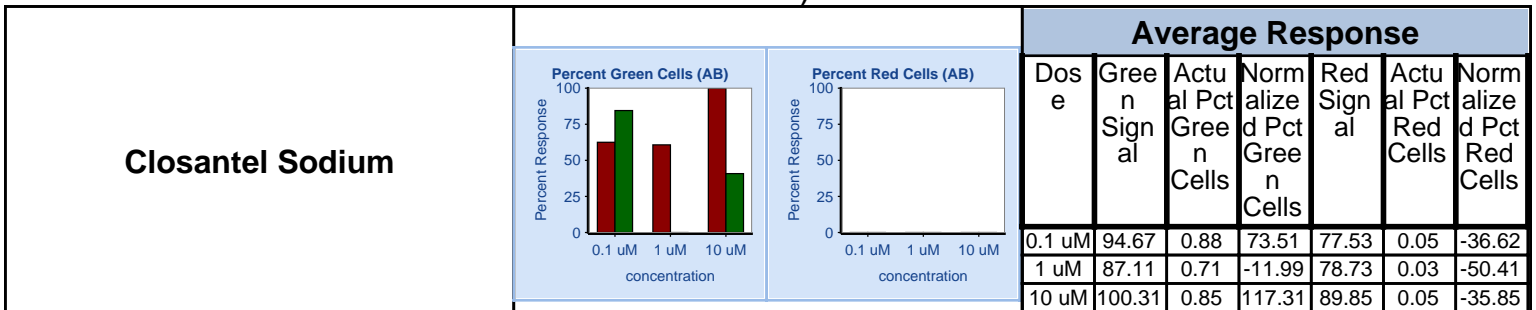

Compound

Normalized Values (A and B Sets)

Responses

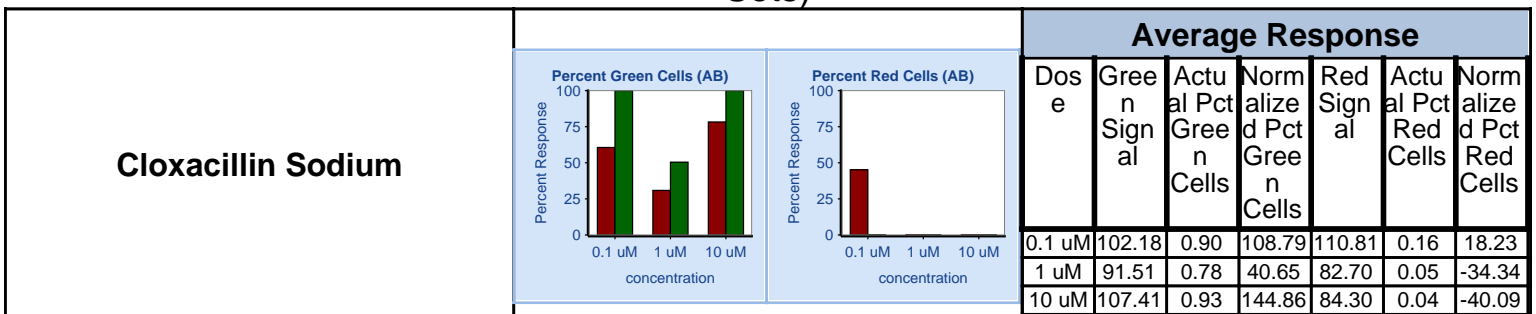

Compound

Normalized Values (A and B Sets)

Responses

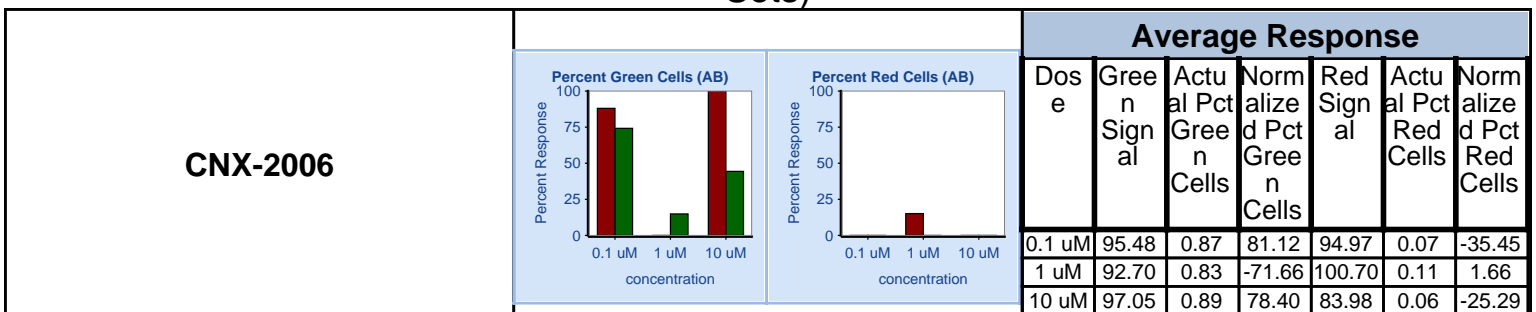

| Compound                 | Normalized Values (A and B Sets) | Responses                                                                                                                                                                                                                                                                                                                                                                                                                                                                                                                                                                                                                                                                       |                  |                        |                            |            |                      |                          |  |      |              |                        |                            |            |                      |                          |        |       |      |       |       |      |        |      |        |      |        |       |      |        |       |       |      |      |       |      |        |
|--------------------------|----------------------------------|---------------------------------------------------------------------------------------------------------------------------------------------------------------------------------------------------------------------------------------------------------------------------------------------------------------------------------------------------------------------------------------------------------------------------------------------------------------------------------------------------------------------------------------------------------------------------------------------------------------------------------------------------------------------------------|------------------|------------------------|----------------------------|------------|----------------------|--------------------------|--|------|--------------|------------------------|----------------------------|------------|----------------------|--------------------------|--------|-------|------|-------|-------|------|--------|------|--------|------|--------|-------|------|--------|-------|-------|------|------|-------|------|--------|
| <b>CO-1686 (AVL-301)</b> |                                  | <table border="1"> <thead> <tr> <th colspan="7">Average Response</th> </tr> <tr> <th>Dose</th> <th>Green Signal</th> <th>Actual Pct Green Cells</th> <th>Normalized Pct Green Cells</th> <th>Red Signal</th> <th>Actual Pct Red Cells</th> <th>Normalized Pct Red Cells</th> </tr> </thead> <tbody> <tr> <td>0.1 uM</td> <td>91.70</td> <td>0.86</td> <td>71.59</td> <td>74.78</td> <td>0.04</td> <td>-51.31</td> </tr> <tr> <td>1 uM</td> <td>102.43</td> <td>0.92</td> <td>182.42</td> <td>66.09</td> <td>0.01</td> <td>-43.16</td> </tr> <tr> <td>10 uM</td> <td>89.60</td> <td>0.82</td> <td>7.38</td> <td>79.31</td> <td>0.09</td> <td>-14.48</td> </tr> </tbody> </table> | Average Response |                        |                            |            |                      |                          |  | Dose | Green Signal | Actual Pct Green Cells | Normalized Pct Green Cells | Red Signal | Actual Pct Red Cells | Normalized Pct Red Cells | 0.1 uM | 91.70 | 0.86 | 71.59 | 74.78 | 0.04 | -51.31 | 1 uM | 102.43 | 0.92 | 182.42 | 66.09 | 0.01 | -43.16 | 10 uM | 89.60 | 0.82 | 7.38 | 79.31 | 0.09 | -14.48 |
|                          |                                  | Average Response                                                                                                                                                                                                                                                                                                                                                                                                                                                                                                                                                                                                                                                                |                  |                        |                            |            |                      |                          |  |      |              |                        |                            |            |                      |                          |        |       |      |       |       |      |        |      |        |      |        |       |      |        |       |       |      |      |       |      |        |
|                          |                                  | Dose                                                                                                                                                                                                                                                                                                                                                                                                                                                                                                                                                                                                                                                                            | Green Signal     | Actual Pct Green Cells | Normalized Pct Green Cells | Red Signal | Actual Pct Red Cells | Normalized Pct Red Cells |  |      |              |                        |                            |            |                      |                          |        |       |      |       |       |      |        |      |        |      |        |       |      |        |       |       |      |      |       |      |        |
|                          |                                  | 0.1 uM                                                                                                                                                                                                                                                                                                                                                                                                                                                                                                                                                                                                                                                                          | 91.70            | 0.86                   | 71.59                      | 74.78      | 0.04                 | -51.31                   |  |      |              |                        |                            |            |                      |                          |        |       |      |       |       |      |        |      |        |      |        |       |      |        |       |       |      |      |       |      |        |
| 1 uM                     | 102.43                           | 0.92                                                                                                                                                                                                                                                                                                                                                                                                                                                                                                                                                                                                                                                                            | 182.42           | 66.09                  | 0.01                       | -43.16     |                      |                          |  |      |              |                        |                            |            |                      |                          |        |       |      |       |       |      |        |      |        |      |        |       |      |        |       |       |      |      |       |      |        |
| 10 uM                    | 89.60                            | 0.82                                                                                                                                                                                                                                                                                                                                                                                                                                                                                                                                                                                                                                                                            | 7.38             | 79.31                  | 0.09                       | -14.48     |                      |                          |  |      |              |                        |                            |            |                      |                          |        |       |      |       |       |      |        |      |        |      |        |       |      |        |       |       |      |      |       |      |        |

| Compound                    | Normalized Values (A and B Sets) | Responses                                                                                                                                                                                                                                                                                                                                                                                                                                                                                                                                                                                                                                                                       |                  |                        |                            |            |                      |                          |  |      |              |                        |                            |            |                      |                          |        |       |      |       |       |      |        |      |       |      |       |       |      |        |       |       |      |        |       |      |        |
|-----------------------------|----------------------------------|---------------------------------------------------------------------------------------------------------------------------------------------------------------------------------------------------------------------------------------------------------------------------------------------------------------------------------------------------------------------------------------------------------------------------------------------------------------------------------------------------------------------------------------------------------------------------------------------------------------------------------------------------------------------------------|------------------|------------------------|----------------------------|------------|----------------------|--------------------------|--|------|--------------|------------------------|----------------------------|------------|----------------------|--------------------------|--------|-------|------|-------|-------|------|--------|------|-------|------|-------|-------|------|--------|-------|-------|------|--------|-------|------|--------|
| <b>Cobicistat (GS-9350)</b> |                                  | <table border="1"> <thead> <tr> <th colspan="7">Average Response</th> </tr> <tr> <th>Dose</th> <th>Green Signal</th> <th>Actual Pct Green Cells</th> <th>Normalized Pct Green Cells</th> <th>Red Signal</th> <th>Actual Pct Red Cells</th> <th>Normalized Pct Red Cells</th> </tr> </thead> <tbody> <tr> <td>0.1 uM</td> <td>92.28</td> <td>0.83</td> <td>46.08</td> <td>78.98</td> <td>0.06</td> <td>-34.36</td> </tr> <tr> <td>1 uM</td> <td>93.23</td> <td>0.79</td> <td>49.53</td> <td>68.31</td> <td>0.01</td> <td>-60.33</td> </tr> <tr> <td>10 uM</td> <td>95.41</td> <td>0.88</td> <td>105.49</td> <td>75.63</td> <td>0.08</td> <td>-24.52</td> </tr> </tbody> </table> | Average Response |                        |                            |            |                      |                          |  | Dose | Green Signal | Actual Pct Green Cells | Normalized Pct Green Cells | Red Signal | Actual Pct Red Cells | Normalized Pct Red Cells | 0.1 uM | 92.28 | 0.83 | 46.08 | 78.98 | 0.06 | -34.36 | 1 uM | 93.23 | 0.79 | 49.53 | 68.31 | 0.01 | -60.33 | 10 uM | 95.41 | 0.88 | 105.49 | 75.63 | 0.08 | -24.52 |
|                             |                                  | Average Response                                                                                                                                                                                                                                                                                                                                                                                                                                                                                                                                                                                                                                                                |                  |                        |                            |            |                      |                          |  |      |              |                        |                            |            |                      |                          |        |       |      |       |       |      |        |      |       |      |       |       |      |        |       |       |      |        |       |      |        |
|                             |                                  | Dose                                                                                                                                                                                                                                                                                                                                                                                                                                                                                                                                                                                                                                                                            | Green Signal     | Actual Pct Green Cells | Normalized Pct Green Cells | Red Signal | Actual Pct Red Cells | Normalized Pct Red Cells |  |      |              |                        |                            |            |                      |                          |        |       |      |       |       |      |        |      |       |      |       |       |      |        |       |       |      |        |       |      |        |
|                             |                                  | 0.1 uM                                                                                                                                                                                                                                                                                                                                                                                                                                                                                                                                                                                                                                                                          | 92.28            | 0.83                   | 46.08                      | 78.98      | 0.06                 | -34.36                   |  |      |              |                        |                            |            |                      |                          |        |       |      |       |       |      |        |      |       |      |       |       |      |        |       |       |      |        |       |      |        |
| 1 uM                        | 93.23                            | 0.79                                                                                                                                                                                                                                                                                                                                                                                                                                                                                                                                                                                                                                                                            | 49.53            | 68.31                  | 0.01                       | -60.33     |                      |                          |  |      |              |                        |                            |            |                      |                          |        |       |      |       |       |      |        |      |       |      |       |       |      |        |       |       |      |        |       |      |        |
| 10 uM                       | 95.41                            | 0.88                                                                                                                                                                                                                                                                                                                                                                                                                                                                                                                                                                                                                                                                            | 105.49           | 75.63                  | 0.08                       | -24.52     |                      |                          |  |      |              |                        |                            |            |                      |                          |        |       |      |       |       |      |        |      |       |      |       |       |      |        |       |       |      |        |       |      |        |

| Compound                     | Normalized Values (A and B Sets) | Responses                                                                                                                                                                                                                                                                                                                                                                                                                                                                                                                                                                                                                                                                         |                  |                        |                            |            |                      |                          |  |      |              |                        |                            |            |                      |                          |        |       |      |       |       |      |       |      |        |      |        |        |      |       |       |        |      |        |        |      |       |
|------------------------------|----------------------------------|-----------------------------------------------------------------------------------------------------------------------------------------------------------------------------------------------------------------------------------------------------------------------------------------------------------------------------------------------------------------------------------------------------------------------------------------------------------------------------------------------------------------------------------------------------------------------------------------------------------------------------------------------------------------------------------|------------------|------------------------|----------------------------|------------|----------------------|--------------------------|--|------|--------------|------------------------|----------------------------|------------|----------------------|--------------------------|--------|-------|------|-------|-------|------|-------|------|--------|------|--------|--------|------|-------|-------|--------|------|--------|--------|------|-------|
| <b>Colistimethate Sodium</b> |                                  | <table border="1"> <thead> <tr> <th colspan="7">Average Response</th> </tr> <tr> <th>Dose</th> <th>Green Signal</th> <th>Actual Pct Green Cells</th> <th>Normalized Pct Green Cells</th> <th>Red Signal</th> <th>Actual Pct Red Cells</th> <th>Normalized Pct Red Cells</th> </tr> </thead> <tbody> <tr> <td>0.1 uM</td> <td>89.89</td> <td>0.86</td> <td>33.72</td> <td>99.37</td> <td>0.11</td> <td>-7.39</td> </tr> <tr> <td>1 uM</td> <td>104.93</td> <td>0.88</td> <td>117.78</td> <td>112.02</td> <td>0.20</td> <td>33.47</td> </tr> <tr> <td>10 uM</td> <td>112.74</td> <td>0.93</td> <td>134.77</td> <td>117.68</td> <td>0.18</td> <td>31.79</td> </tr> </tbody> </table> | Average Response |                        |                            |            |                      |                          |  | Dose | Green Signal | Actual Pct Green Cells | Normalized Pct Green Cells | Red Signal | Actual Pct Red Cells | Normalized Pct Red Cells | 0.1 uM | 89.89 | 0.86 | 33.72 | 99.37 | 0.11 | -7.39 | 1 uM | 104.93 | 0.88 | 117.78 | 112.02 | 0.20 | 33.47 | 10 uM | 112.74 | 0.93 | 134.77 | 117.68 | 0.18 | 31.79 |
|                              |                                  | Average Response                                                                                                                                                                                                                                                                                                                                                                                                                                                                                                                                                                                                                                                                  |                  |                        |                            |            |                      |                          |  |      |              |                        |                            |            |                      |                          |        |       |      |       |       |      |       |      |        |      |        |        |      |       |       |        |      |        |        |      |       |
|                              |                                  | Dose                                                                                                                                                                                                                                                                                                                                                                                                                                                                                                                                                                                                                                                                              | Green Signal     | Actual Pct Green Cells | Normalized Pct Green Cells | Red Signal | Actual Pct Red Cells | Normalized Pct Red Cells |  |      |              |                        |                            |            |                      |                          |        |       |      |       |       |      |       |      |        |      |        |        |      |       |       |        |      |        |        |      |       |
|                              |                                  | 0.1 uM                                                                                                                                                                                                                                                                                                                                                                                                                                                                                                                                                                                                                                                                            | 89.89            | 0.86                   | 33.72                      | 99.37      | 0.11                 | -7.39                    |  |      |              |                        |                            |            |                      |                          |        |       |      |       |       |      |       |      |        |      |        |        |      |       |       |        |      |        |        |      |       |
| 1 uM                         | 104.93                           | 0.88                                                                                                                                                                                                                                                                                                                                                                                                                                                                                                                                                                                                                                                                              | 117.78           | 112.02                 | 0.20                       | 33.47      |                      |                          |  |      |              |                        |                            |            |                      |                          |        |       |      |       |       |      |       |      |        |      |        |        |      |       |       |        |      |        |        |      |       |
| 10 uM                        | 112.74                           | 0.93                                                                                                                                                                                                                                                                                                                                                                                                                                                                                                                                                                                                                                                                              | 134.77           | 117.68                 | 0.18                       | 31.79      |                      |                          |  |      |              |                        |                            |            |                      |                          |        |       |      |       |       |      |       |      |        |      |        |        |      |       |       |        |      |        |        |      |       |

| Compound                 | Normalized Values (A and B Sets) | Responses                                                                                                                                                                                                                                                                                                                                                                                                                                                                                                                                                                                                                                                                          |                  |                        |                            |            |                      |                          |  |      |              |                        |                            |            |                      |                          |        |        |      |        |        |      |       |      |        |      |        |        |      |       |       |       |      |        |       |      |       |
|--------------------------|----------------------------------|------------------------------------------------------------------------------------------------------------------------------------------------------------------------------------------------------------------------------------------------------------------------------------------------------------------------------------------------------------------------------------------------------------------------------------------------------------------------------------------------------------------------------------------------------------------------------------------------------------------------------------------------------------------------------------|------------------|------------------------|----------------------------|------------|----------------------|--------------------------|--|------|--------------|------------------------|----------------------------|------------|----------------------|--------------------------|--------|--------|------|--------|--------|------|-------|------|--------|------|--------|--------|------|-------|-------|-------|------|--------|-------|------|-------|
| <b>Combretastatin A4</b> |                                  | <table border="1"> <thead> <tr> <th colspan="7">Average Response</th> </tr> <tr> <th>Dose</th> <th>Green Signal</th> <th>Actual Pct Green Cells</th> <th>Normalized Pct Green Cells</th> <th>Red Signal</th> <th>Actual Pct Red Cells</th> <th>Normalized Pct Red Cells</th> </tr> </thead> <tbody> <tr> <td>0.1 uM</td> <td>110.79</td> <td>0.92</td> <td>127.77</td> <td>105.19</td> <td>0.15</td> <td>19.90</td> </tr> <tr> <td>1 uM</td> <td>104.06</td> <td>0.87</td> <td>247.98</td> <td>117.19</td> <td>0.23</td> <td>77.55</td> </tr> <tr> <td>10 uM</td> <td>80.39</td> <td>0.58</td> <td>229.20</td> <td>99.86</td> <td>0.19</td> <td>31.58</td> </tr> </tbody> </table> | Average Response |                        |                            |            |                      |                          |  | Dose | Green Signal | Actual Pct Green Cells | Normalized Pct Green Cells | Red Signal | Actual Pct Red Cells | Normalized Pct Red Cells | 0.1 uM | 110.79 | 0.92 | 127.77 | 105.19 | 0.15 | 19.90 | 1 uM | 104.06 | 0.87 | 247.98 | 117.19 | 0.23 | 77.55 | 10 uM | 80.39 | 0.58 | 229.20 | 99.86 | 0.19 | 31.58 |
|                          |                                  | Average Response                                                                                                                                                                                                                                                                                                                                                                                                                                                                                                                                                                                                                                                                   |                  |                        |                            |            |                      |                          |  |      |              |                        |                            |            |                      |                          |        |        |      |        |        |      |       |      |        |      |        |        |      |       |       |       |      |        |       |      |       |
|                          |                                  | Dose                                                                                                                                                                                                                                                                                                                                                                                                                                                                                                                                                                                                                                                                               | Green Signal     | Actual Pct Green Cells | Normalized Pct Green Cells | Red Signal | Actual Pct Red Cells | Normalized Pct Red Cells |  |      |              |                        |                            |            |                      |                          |        |        |      |        |        |      |       |      |        |      |        |        |      |       |       |       |      |        |       |      |       |
|                          |                                  | 0.1 uM                                                                                                                                                                                                                                                                                                                                                                                                                                                                                                                                                                                                                                                                             | 110.79           | 0.92                   | 127.77                     | 105.19     | 0.15                 | 19.90                    |  |      |              |                        |                            |            |                      |                          |        |        |      |        |        |      |       |      |        |      |        |        |      |       |       |       |      |        |       |      |       |
| 1 uM                     | 104.06                           | 0.87                                                                                                                                                                                                                                                                                                                                                                                                                                                                                                                                                                                                                                                                               | 247.98           | 117.19                 | 0.23                       | 77.55      |                      |                          |  |      |              |                        |                            |            |                      |                          |        |        |      |        |        |      |       |      |        |      |        |        |      |       |       |       |      |        |       |      |       |
| 10 uM                    | 80.39                            | 0.58                                                                                                                                                                                                                                                                                                                                                                                                                                                                                                                                                                                                                                                                               | 229.20           | 99.86                  | 0.19                       | 31.58      |                      |                          |  |      |              |                        |                            |            |                      |                          |        |        |      |        |        |      |       |      |        |      |        |        |      |       |       |       |      |        |       |      |       |

| Compound              | Normalized Values (A and B Sets) | Responses                                                                                                                                                                                                                                                                                                                                                                                                                                                                                                                                              |                            |            |                      |                          |  |  |  |      |              |                        |                            |            |                      |                          |        |       |      |       |       |      |        |      |       |      |  |       |      |        |
|-----------------------|----------------------------------|--------------------------------------------------------------------------------------------------------------------------------------------------------------------------------------------------------------------------------------------------------------------------------------------------------------------------------------------------------------------------------------------------------------------------------------------------------------------------------------------------------------------------------------------------------|----------------------------|------------|----------------------|--------------------------|--|--|--|------|--------------|------------------------|----------------------------|------------|----------------------|--------------------------|--------|-------|------|-------|-------|------|--------|------|-------|------|--|-------|------|--------|
| <b>Conivaptan HCl</b> |                                  | <table border="1"> <thead> <tr> <th colspan="7">Average Response</th> </tr> <tr> <th>Dose</th> <th>Green Signal</th> <th>Actual Pct Green Cells</th> <th>Normalized Pct Green Cells</th> <th>Red Signal</th> <th>Actual Pct Red Cells</th> <th>Normalized Pct Red Cells</th> </tr> </thead> <tbody> <tr> <td>0.1 uM</td> <td>97.20</td> <td>0.86</td> <td>72.39</td> <td>86.21</td> <td>0.05</td> <td>-44.10</td> </tr> <tr> <td>1 uM</td> <td>74.00</td> <td>0.60</td> <td></td> <td>70.89</td> <td>0.04</td> <td>-22.73</td> </tr> </tbody> </table> | Average Response           |            |                      |                          |  |  |  | Dose | Green Signal | Actual Pct Green Cells | Normalized Pct Green Cells | Red Signal | Actual Pct Red Cells | Normalized Pct Red Cells | 0.1 uM | 97.20 | 0.86 | 72.39 | 86.21 | 0.05 | -44.10 | 1 uM | 74.00 | 0.60 |  | 70.89 | 0.04 | -22.73 |
|                       |                                  | Average Response                                                                                                                                                                                                                                                                                                                                                                                                                                                                                                                                       |                            |            |                      |                          |  |  |  |      |              |                        |                            |            |                      |                          |        |       |      |       |       |      |        |      |       |      |  |       |      |        |
| Dose                  | Green Signal                     | Actual Pct Green Cells                                                                                                                                                                                                                                                                                                                                                                                                                                                                                                                                 | Normalized Pct Green Cells | Red Signal | Actual Pct Red Cells | Normalized Pct Red Cells |  |  |  |      |              |                        |                            |            |                      |                          |        |       |      |       |       |      |        |      |       |      |  |       |      |        |
| 0.1 uM                | 97.20                            | 0.86                                                                                                                                                                                                                                                                                                                                                                                                                                                                                                                                                   | 72.39                      | 86.21      | 0.05                 | -44.10                   |  |  |  |      |              |                        |                            |            |                      |                          |        |       |      |       |       |      |        |      |       |      |  |       |      |        |
| 1 uM                  | 74.00                            | 0.60                                                                                                                                                                                                                                                                                                                                                                                                                                                                                                                                                   |                            | 70.89      | 0.04                 | -22.73                   |  |  |  |      |              |                        |                            |            |                      |                          |        |       |      |       |       |      |        |      |       |      |  |       |      |        |

Compound

Normalized Values (A and B Sets)

Responses

|  |       |        |      |          |        |      |       |
|--|-------|--------|------|----------|--------|------|-------|
|  |       |        |      | -1576.75 |        |      |       |
|  | 10 uM | 100.47 | 0.89 | 69.99    | 105.73 | 0.18 | 28.26 |

Compound

Normalized Values (A and B Sets)

Responses

| Compound          | Normalized Values (A and B Sets) |  | Average Response       |              |                        |                            |            |                      |                          |      |        |
|-------------------|----------------------------------|--|------------------------|--------------|------------------------|----------------------------|------------|----------------------|--------------------------|------|--------|
|                   |                                  |  | Dose                   | Green Signal | Actual Pct Green Cells | Normalized Pct Green Cells | Red Signal | Actual Pct Red Cells | Normalized Pct Red Cells |      |        |
| Cortisone acetate | Percent Green Cells (AB)         |  | Percent Red Cells (AB) |              | 0.1 uM                 | 109.41                     | 0.94       | 142.17               | 97.40                    | 0.10 | -8.20  |
|                   | Percent Green Cells (AB)         |  | Percent Red Cells (AB) |              | 1 uM                   | 106.43                     | 0.91       | 113.24               | 99.41                    | 0.11 | -5.98  |
|                   | Percent Green Cells (AB)         |  | Percent Red Cells (AB) |              | 10 uM                  | 107.73                     | 0.95       | 274.73               | 101.07                   | 0.09 | -13.78 |
|                   | Percent Green Cells (AB)         |  | Percent Red Cells (AB) |              |                        |                            |            |                      |                          |      |        |

Compound

Normalized Values (A and B Sets)

Responses

| Compound    | Normalized Values (A and B Sets) |  | Average Response       |              |                        |                            |            |                      |                          |      |        |
|-------------|----------------------------------|--|------------------------|--------------|------------------------|----------------------------|------------|----------------------|--------------------------|------|--------|
|             |                                  |  | Dose                   | Green Signal | Actual Pct Green Cells | Normalized Pct Green Cells | Red Signal | Actual Pct Red Cells | Normalized Pct Red Cells |      |        |
| Costunolide | Percent Green Cells (AB)         |  | Percent Red Cells (AB) |              | 0.1 uM                 | 91.01                      | 0.77       | -71.30               | 84.99                    | 0.05 | -43.21 |
|             | Percent Green Cells (AB)         |  | Percent Red Cells (AB) |              | 1 uM                   | 97.95                      | 0.86       | 99.39                | 88.79                    | 0.03 | -41.44 |
|             | Percent Green Cells (AB)         |  | Percent Red Cells (AB) |              | 10 uM                  | 98.55                      | 0.80       | 51.37                | 93.34                    | 0.05 | -29.30 |
|             | Percent Green Cells (AB)         |  | Percent Red Cells (AB) |              |                        |                            |            |                      |                          |      |        |

Compound

Normalized Values (A and B Sets)

Responses

| Compound | Normalized Values (A and B Sets) |  | Average Response       |              |                        |                            |            |                      |                          |      |        |
|----------|----------------------------------|--|------------------------|--------------|------------------------|----------------------------|------------|----------------------|--------------------------|------|--------|
|          |                                  |  | Dose                   | Green Signal | Actual Pct Green Cells | Normalized Pct Green Cells | Red Signal | Actual Pct Red Cells | Normalized Pct Red Cells |      |        |
| CP-91149 | Percent Green Cells (AB)         |  | Percent Red Cells (AB) |              | 0.1 uM                 | 92.94                      | 0.86       | 65.75                | 83.47                    | 0.03 | -55.45 |
|          | Percent Green Cells (AB)         |  | Percent Red Cells (AB) |              | 1 uM                   | 96.89                      | 0.88       | 73.73                | 79.60                    | 0.04 | -31.83 |
|          | Percent Green Cells (AB)         |  | Percent Red Cells (AB) |              | 10 uM                  | 91.18                      | 0.85       | 32.44                | 77.85                    | 0.04 | -31.37 |
|          | Percent Green Cells (AB)         |  | Percent Red Cells (AB) |              |                        |                            |            |                      |                          |      |        |

Compound

Normalized Values (A and B Sets)

Responses

| Compound  | Normalized Values (A and B Sets) |  | Average Response       |              |                        |                            |            |                      |                          |      |        |
|-----------|----------------------------------|--|------------------------|--------------|------------------------|----------------------------|------------|----------------------|--------------------------|------|--------|
|           |                                  |  | Dose                   | Green Signal | Actual Pct Green Cells | Normalized Pct Green Cells | Red Signal | Actual Pct Red Cells | Normalized Pct Red Cells |      |        |
| CP-673451 | Percent Green Cells (AB)         |  | Percent Red Cells (AB) |              | 0.1 uM                 | 92.47                      | 0.82       | 36.48                | 84.84                    | 0.04 | -52.58 |
|           | Percent Green Cells (AB)         |  | Percent Red Cells (AB) |              | 1 uM                   | 113.68                     | 0.92       | 120.52               | 100.13                   | 0.08 | -20.61 |
|           | Percent Green Cells (AB)         |  | Percent Red Cells (AB) |              | 10 uM                  | 96.88                      | 0.78       | 28.87                | 154.78                   | 0.31 | 84.30  |
|           | Percent Green Cells (AB)         |  | Percent Red Cells (AB) |              |                        |                            |            |                      |                          |      |        |

Compound

Normalized Values (A and B Sets)

Responses

| Compound  | Normalized Values (A and B Sets) |  | Average Response |              |                        |                            |            |                      |                          |  |  |
|-----------|----------------------------------|--|------------------|--------------|------------------------|----------------------------|------------|----------------------|--------------------------|--|--|
|           |                                  |  | Dose             | Green Signal | Actual Pct Green Cells | Normalized Pct Green Cells | Red Signal | Actual Pct Red Cells | Normalized Pct Red Cells |  |  |
| CP-724714 |                                  |  |                  |              |                        |                            |            |                      |                          |  |  |
|           |                                  |  |                  |              |                        |                            |            |                      |                          |  |  |

Compound

Normalized Values (A and B Sets)

Responses

| Compound      | Normalized Values (A and B Sets) |               | Responses                |        |                        |        |                        |                            |                      |                          |
|---------------|----------------------------------|---------------|--------------------------|--------|------------------------|--------|------------------------|----------------------------|----------------------|--------------------------|
|               |                                  |               | Percent Green Cells (AB) |        | Percent Red Cells (AB) |        | Actual Pct Green Cells | Normalized Pct Green Cells | Actual Pct Red Cells | Normalized Pct Red Cells |
|               |                                  |               | Percent Response         |        | Percent Response       |        |                        |                            |                      |                          |
|               |                                  |               | 0.1 uM                   | 1 uM   | 10 uM                  | 0.1 uM |                        |                            |                      |                          |
| concentration |                                  | concentration |                          | 0.1 uM | 93.11                  | 0.87   | 72.68                  | 76.63                      | 0.02                 | -63.08                   |
|               |                                  |               |                          | 1 uM   | 104.21                 | 0.86   | 72.68                  | 97.81                      | 0.08                 | -19.02                   |
|               |                                  |               |                          | 10 uM  | 98.13                  | 0.84   | 77.94                  | 111.61                     | 0.09                 | -10.23                   |

Compound

Normalized Values (A and B Sets)

Responses

| Compound      | Normalized Values (A and B Sets) |               | Average Response         |        |                        |        |        |              |                        |                            |            |                      |                          |
|---------------|----------------------------------|---------------|--------------------------|--------|------------------------|--------|--------|--------------|------------------------|----------------------------|------------|----------------------|--------------------------|
|               |                                  |               | Percent Green Cells (AB) |        | Percent Red Cells (AB) |        | Dose   | Green Signal | Actual Pct Green Cells | Normalized Pct Green Cells | Red Signal | Actual Pct Red Cells | Normalized Pct Red Cells |
|               |                                  |               | Percent Response         |        | Percent Response       |        |        |              |                        |                            |            |                      |                          |
|               |                                  |               | 0.1 uM                   | 1 uM   | 10 uM                  | 0.1 uM |        |              |                        |                            |            |                      |                          |
| concentration |                                  | concentration |                          | 0.1 uM | 96.71                  | 0.89   | 103.49 | 74.33        | 0.02                   | -63.46                     |            |                      |                          |
|               |                                  |               |                          | 1 uM   | 87.12                  | 0.79   | 61.74  | 63.05        | 0.01                   | -43.56                     |            |                      |                          |
|               |                                  |               |                          | 10 uM  | 89.02                  | 0.87   | 51.94  | 74.40        | 0.05                   | -28.48                     |            |                      |                          |

cPEPCK inhibitor

Compound

Normalized Values (A and B Sets)

Responses

| Compound      | Normalized Values (A and B Sets) |               | Average Response         |        |                        |        |        |              |                        |                            |            |                      |                          |
|---------------|----------------------------------|---------------|--------------------------|--------|------------------------|--------|--------|--------------|------------------------|----------------------------|------------|----------------------|--------------------------|
|               |                                  |               | Percent Green Cells (AB) |        | Percent Red Cells (AB) |        | Dose   | Green Signal | Actual Pct Green Cells | Normalized Pct Green Cells | Red Signal | Actual Pct Red Cells | Normalized Pct Red Cells |
|               |                                  |               | Percent Response         |        | Percent Response       |        |        |              |                        |                            |            |                      |                          |
|               |                                  |               | 0.1 uM                   | 1 uM   | 10 uM                  | 0.1 uM |        |              |                        |                            |            |                      |                          |
| concentration |                                  | concentration |                          | 0.1 uM | 98.81                  | 0.89   | 100.33 | 99.06        | 0.10                   | -6.89                      |            |                      |                          |
|               |                                  |               |                          | 1 uM   | 106.38                 | 0.90   | 103.37 | 93.96        | 0.07                   | -24.20                     |            |                      |                          |
|               |                                  |               |                          | 10 uM  | 93.66                  | 0.84   | 524.73 | 107.42       | 0.10                   | -9.46                      |            |                      |                          |

CPI-613

Compound

Normalized Values (A and B Sets)

Responses

| Compound      | Normalized Values (A and B Sets) |               | Average Response         |        |                        |        |        |              |                        |                            |            |                      |                          |
|---------------|----------------------------------|---------------|--------------------------|--------|------------------------|--------|--------|--------------|------------------------|----------------------------|------------|----------------------|--------------------------|
|               |                                  |               | Percent Green Cells (AB) |        | Percent Red Cells (AB) |        | Dose   | Green Signal | Actual Pct Green Cells | Normalized Pct Green Cells | Red Signal | Actual Pct Red Cells | Normalized Pct Red Cells |
|               |                                  |               | Percent Response         |        | Percent Response       |        |        |              |                        |                            |            |                      |                          |
|               |                                  |               | 0.1 uM                   | 1 uM   | 10 uM                  | 0.1 uM |        |              |                        |                            |            |                      |                          |
| concentration |                                  | concentration |                          | 0.1 uM | 91.55                  | 0.84   | 50.84  | 79.41        | 0.04                   | -38.38                     |            |                      |                          |
|               |                                  |               |                          | 1 uM   | 103.80                 | 0.88   | 86.27  | 80.59        | 0.05                   | -31.96                     |            |                      |                          |
|               |                                  |               |                          | 10 uM  | 143.22                 | 0.91   | -44.15 | 129.92       | 0.25                   | 61.15                      |            |                      |                          |

Crenolanib (CP-868596)

Compound

Normalized Values (A and B Sets)

Responses

| Compound      | Normalized Values (A and B Sets) |               | Average Response         |        |                        |        |        |              |                        |                            |            |                      |                          |
|---------------|----------------------------------|---------------|--------------------------|--------|------------------------|--------|--------|--------------|------------------------|----------------------------|------------|----------------------|--------------------------|
|               |                                  |               | Percent Green Cells (AB) |        | Percent Red Cells (AB) |        | Dose   | Green Signal | Actual Pct Green Cells | Normalized Pct Green Cells | Red Signal | Actual Pct Red Cells | Normalized Pct Red Cells |
|               |                                  |               | Percent Response         |        | Percent Response       |        |        |              |                        |                            |            |                      |                          |
|               |                                  |               | 0.1 uM                   | 1 uM   | 10 uM                  | 0.1 uM |        |              |                        |                            |            |                      |                          |
| concentration |                                  | concentration |                          | 0.1 uM | 94.48                  | 0.92   | 76.49  | 93.96        | 0.11                   | -5.54                      |            |                      |                          |
|               |                                  |               |                          | 1 uM   | 95.28                  | 0.87   | 108.89 | 98.01        | 0.09                   | -19.83                     |            |                      |                          |
|               |                                  |               |                          | 10 uM  | 99.12                  | 0.89   | 157.68 | 98.83        | 0.07                   | -23.69                     |            |                      |                          |

CTEP (RO4956371)



Compound

Normalized Values (A and B Sets)

Responses

| CUDC-101 | Percent Green Cells (AB) |      | Percent Red Cells (AB) |        | Average Response |              |                        |                            |            |                      |                          |       |       |
|----------|--------------------------|------|------------------------|--------|------------------|--------------|------------------------|----------------------------|------------|----------------------|--------------------------|-------|-------|
|          | Percent Response         |      | Percent Response       |        | Dose             | Green Signal | Actual Pct Green Cells | Normalized Pct Green Cells | Red Signal | Actual Pct Red Cells | Normalized Pct Red Cells |       |       |
|          | concentration            |      | concentration          |        | 0.1 uM           | 1 uM         | 10 uM                  | 0.1 uM                     | 1 uM       | 10 uM                | 0.1 uM                   | 1 uM  | 10 uM |
|          | 0.1 uM                   | 1 uM | 10 uM                  | 0.1 uM | 1 uM             | 10 uM        | 0.1 uM                 | 1 uM                       | 10 uM      | 0.1 uM               | 1 uM                     | 10 uM |       |
|          | 100                      | 50   | 100                    | 50     | 25               | 10           | 0                      | 0                          | 0          | 0                    | 0                        | 0     |       |
|          | 75                       | 55   | 75                     | 55     | 97.26            | 0.86         | 82.03                  | 84.52                      | 0.04       | -49.92               |                          |       |       |
|          | 50                       | 55   | 25                     | 10     | 116.48           | 0.89         | 117.26                 | 105.30                     | 0.11       | -8.56                |                          |       |       |
|          | 25                       | 10   | 10                     | 5      | 94.35            | 0.76         | 20.01                  | 151.28                     | 0.28       | 64.41                |                          |       |       |

Compound

Normalized Values (A and B Sets)

Responses

| CUDC-907 | Percent Green Cells (AB) |      | Percent Red Cells (AB) |        | Average Response |              |                        |                            |            |                      |                          |       |       |
|----------|--------------------------|------|------------------------|--------|------------------|--------------|------------------------|----------------------------|------------|----------------------|--------------------------|-------|-------|
|          | Percent Response         |      | Percent Response       |        | Dose             | Green Signal | Actual Pct Green Cells | Normalized Pct Green Cells | Red Signal | Actual Pct Red Cells | Normalized Pct Red Cells |       |       |
|          | concentration            |      | concentration          |        | 0.1 uM           | 1 uM         | 10 uM                  | 0.1 uM                     | 1 uM       | 10 uM                | 0.1 uM                   | 1 uM  | 10 uM |
|          | 0.1 uM                   | 1 uM | 10 uM                  | 0.1 uM | 1 uM             | 10 uM        | 0.1 uM                 | 1 uM                       | 10 uM      | 0.1 uM               | 1 uM                     | 10 uM |       |
|          | 75                       | 90   | 100                    | 0      | 0                | 0            | 0                      | 0                          | 0          | 0                    | 0                        | 0     |       |
|          | 75                       | 55   | 25                     | 0      | 91.73            | 0.81         | 5.55                   | 87.75                      | 0.05       | -28.63               |                          |       |       |
|          | 50                       | 55   | 10                     | 0      | 106.24           | 0.85         | 74.49                  | 108.86                     | 0.12       | -2.04                |                          |       |       |
|          | 25                       | 10   | 5                      | 0      | 89.86            | 0.72         | 152.37                 | 73.89                      | 0.06       | -30.55               |                          |       |       |

Compound

Normalized Values (A and B Sets)

Responses

| Curcumol | Percent Green Cells (AB) |      | Percent Red Cells (AB) |        | Average Response |              |                        |                            |            |                      |                          |       |       |
|----------|--------------------------|------|------------------------|--------|------------------|--------------|------------------------|----------------------------|------------|----------------------|--------------------------|-------|-------|
|          | Percent Response         |      | Percent Response       |        | Dose             | Green Signal | Actual Pct Green Cells | Normalized Pct Green Cells | Red Signal | Actual Pct Red Cells | Normalized Pct Red Cells |       |       |
|          | concentration            |      | concentration          |        | 0.1 uM           | 1 uM         | 10 uM                  | 0.1 uM                     | 1 uM       | 10 uM                | 0.1 uM                   | 1 uM  | 10 uM |
|          | 0.1 uM                   | 1 uM | 10 uM                  | 0.1 uM | 1 uM             | 10 uM        | 0.1 uM                 | 1 uM                       | 10 uM      | 0.1 uM               | 1 uM                     | 10 uM |       |
|          | 10                       | 15   | 100                    | 100    | 0                | 0            | 0                      | 0                          | 0          | 0                    | 0                        | 0     |       |
|          | 10                       | 35   | 35                     | 15     | 86.72            | 0.81         | 13.45                  | 90.38                      | 0.06       | -26.77               |                          |       |       |
|          | 25                       | 100  | 10                     | 15     | 97.08            | 0.82         | 69.88                  | 70.95                      | 0.02       | -48.99               |                          |       |       |
|          | 10                       | 35   | 5                      | 15     | 103.31           | 0.92         | 366.89                 | 115.93                     | 0.14       | 9.18                 |                          |       |       |

Compound

Normalized Values (A and B Sets)

Responses

| CX-4945 (Silmitasertib) | Percent Green Cells (AB) |      | Percent Red Cells (AB) |        | Average Response |              |                        |                            |            |                      |                          |       |       |
|-------------------------|--------------------------|------|------------------------|--------|------------------|--------------|------------------------|----------------------------|------------|----------------------|--------------------------|-------|-------|
|                         | Percent Response         |      | Percent Response       |        | Dose             | Green Signal | Actual Pct Green Cells | Normalized Pct Green Cells | Red Signal | Actual Pct Red Cells | Normalized Pct Red Cells |       |       |
|                         | concentration            |      | concentration          |        | 0.1 uM           | 1 uM         | 10 uM                  | 0.1 uM                     | 1 uM       | 10 uM                | 0.1 uM                   | 1 uM  | 10 uM |
|                         | 0.1 uM                   | 1 uM | 10 uM                  | 0.1 uM | 1 uM             | 10 uM        | 0.1 uM                 | 1 uM                       | 10 uM      | 0.1 uM               | 1 uM                     | 10 uM |       |
|                         | 100                      | 55   | 90                     | 25     | 0                | 0            | 0                      | 0                          | 0          | 0                    | 0                        | 0     |       |
|                         | 100                      | 55   | 25                     | 0      | 99.57            | 0.89         | 88.81                  | 86.62                      | 0.06       | -27.01               |                          |       |       |
|                         | 50                       | 25   | 100                    | 0      | 101.01           | 0.83         | 61.86                  | 88.95                      | 0.06       | -30.13               |                          |       |       |
|                         | 25                       | 100  | 0                      | 0      | 102.16           | 0.86         | 403.24                 | 78.29                      | 0.03       | -45.82               |                          |       |       |

Compound

Normalized Values (A and B Sets)

Responses

| CYC116 | Percent Green Cells (AB) |      | Percent Red Cells (AB) |        | Average Response |              |                        |                            |            |                      |                          |       |       |
|--------|--------------------------|------|------------------------|--------|------------------|--------------|------------------------|----------------------------|------------|----------------------|--------------------------|-------|-------|
|        | Percent Response         |      | Percent Response       |        | Dose             | Green Signal | Actual Pct Green Cells | Normalized Pct Green Cells | Red Signal | Actual Pct Red Cells | Normalized Pct Red Cells |       |       |
|        | concentration            |      | concentration          |        | 0.1 uM           | 1 uM         | 10 uM                  | 0.1 uM                     | 1 uM       | 10 uM                | 0.1 uM                   | 1 uM  | 10 uM |
|        | 0.1 uM                   | 1 uM | 10 uM                  | 0.1 uM | 1 uM             | 10 uM        | 0.1 uM                 | 1 uM                       | 10 uM      | 0.1 uM               | 1 uM                     | 10 uM |       |
|        | 100                      | 100  | 85                     | 100    | 0                | 0            | 0                      | 0                          | 0          | 0                    | 0                        | 0     |       |
|        | 100                      | 100  | 85                     | 0      | 108.69           | 0.94         | 124.01                 | 105.45                     | 0.10       | -18.05               |                          |       |       |
|        | 100                      | 100  | 85                     | 0      | 96.14            | 0.76         | 11.89                  | 84.77                      | 0.05       | -33.70               |                          |       |       |
|        | 100                      | 100  | 85                     | 0      | 93.95            | 0.77         | 37.01                  | 96.52                      | 0.06       | -28.81               |                          |       |       |

Compound

Normalized Values (A and B Sets)

Responses

| Cyclamic acid |       |      | Average Response |              |                        |                            |            |                      |                          |
|---------------|-------|------|------------------|--------------|------------------------|----------------------------|------------|----------------------|--------------------------|
|               |       |      | Dose             | Green Signal | Actual Pct Green Cells | Normalized Pct Green Cells | Red Signal | Actual Pct Red Cells | Normalized Pct Red Cells |
|               |       |      | 0.1 uM           | 105.77       | 0.93                   | 251.21                     | 92.54      | 0.08                 | -23.35                   |
|               |       |      | 1 uM             | 78.62        | 0.58                   | -                          | 83.19      | 0.03                 | -51.96                   |
| 10 uM         | 99.67 | 0.87 | 92.37            | 86.05        | 0.05                   | -35.89                     |            |                      |                          |

Compound

Normalized Values (A and B Sets)

Responses

| Cyclandelate |       |      | Average Response |              |                        |                            |            |                      |                          |
|--------------|-------|------|------------------|--------------|------------------------|----------------------------|------------|----------------------|--------------------------|
|              |       |      | Dose             | Green Signal | Actual Pct Green Cells | Normalized Pct Green Cells | Red Signal | Actual Pct Red Cells | Normalized Pct Red Cells |
|              |       |      | 0.1 uM           | 94.40        | 0.84                   | 58.14                      | 90.32      | 0.06                 | -40.42                   |
|              |       |      | 1 uM             | 91.31        | 0.83                   | -                          | 82.92      | 0.04                 | -28.74                   |
| 10 uM        | 92.52 | 0.87 | 51.39            | 68.57        | 0.03                   | -36.30                     |            |                      |                          |

Compound

Normalized Values (A and B Sets)

Responses

| Cyclizine 2HCl |        |      | Average Response |              |                        |                            |            |                      |                          |
|----------------|--------|------|------------------|--------------|------------------------|----------------------------|------------|----------------------|--------------------------|
|                |        |      | Dose             | Green Signal | Actual Pct Green Cells | Normalized Pct Green Cells | Red Signal | Actual Pct Red Cells | Normalized Pct Red Cells |
|                |        |      | 0.1 uM           | 111.53       | 0.93                   | 102.32                     | 98.46      | 0.14                 | 7.53                     |
|                |        |      | 1 uM             | 92.94        | 0.73                   | 2.27                       | 122.28     | 0.25                 | 59.61                    |
| 10 uM          | 107.38 | 0.89 | 94.04            | 106.51       | 0.15                   | 16.61                      |            |                      |                          |

Compound

Normalized Values (A and B Sets)

Responses

| Cyclocytidine HCl |        |      | Average Response |              |                        |                            |            |                      |                          |
|-------------------|--------|------|------------------|--------------|------------------------|----------------------------|------------|----------------------|--------------------------|
|                   |        |      | Dose             | Green Signal | Actual Pct Green Cells | Normalized Pct Green Cells | Red Signal | Actual Pct Red Cells | Normalized Pct Red Cells |
|                   |        |      | 0.1 uM           | 113.70       | 0.95                   | 145.45                     | 106.02     | 0.12                 | -0.74                    |
|                   |        |      | 1 uM             | 108.45       | 0.83                   | -0.98                      | 107.86     | 0.12                 | -0.84                    |
| 10 uM             | 101.82 | 0.75 | 11.55            | 117.47       | 0.13                   | 5.21                       |            |                      |                          |

Compound

Normalized Values (A and B Sets)

Responses

| Cyclosporin A |        |      | Average Response |              |                        |                            |            |                      |                          |
|---------------|--------|------|------------------|--------------|------------------------|----------------------------|------------|----------------------|--------------------------|
|               |        |      | Dose             | Green Signal | Actual Pct Green Cells | Normalized Pct Green Cells | Red Signal | Actual Pct Red Cells | Normalized Pct Red Cells |
|               |        |      | 0.1 uM           | 102.81       | 0.89                   | 98.03                      | 102.98     | 0.12                 | 0.08                     |
|               |        |      | 1 uM             | 112.53       | 0.91                   | 112.35                     | 104.24     | 0.14                 | 3.97                     |
| 10 uM         | 103.68 | 0.92 | 250.89           | 90.31        | 0.07                   | -23.40                     |            |                      |                          |

Compound

Normalized Values (A and B Sets)

Responses

| Cyclosporine |        |      | Average Response |              |                        |                            |            |                      |                          |
|--------------|--------|------|------------------|--------------|------------------------|----------------------------|------------|----------------------|--------------------------|
|              |        |      | Dose             | Green Signal | Actual Pct Green Cells | Normalized Pct Green Cells | Red Signal | Actual Pct Red Cells | Normalized Pct Red Cells |
|              |        |      | 0.1 uM           | 105.43       | 0.92                   | 127.41                     | 111.95     | 0.12                 | -5.64                    |
|              |        |      | 1 uM             | 113.20       | 0.92                   | 132.47                     | 105.65     | 0.09                 | -15.35                   |
| 10 uM        | 111.50 | 0.90 | 114.57           | 113.03       | 0.10                   | -10.99                     |            |                      |                          |

Compound

Normalized Values (A and B Sets)

Responses

| Cyproterone Acetate |        |      | Average Response |              |                        |                            |            |                      |                          |
|---------------------|--------|------|------------------|--------------|------------------------|----------------------------|------------|----------------------|--------------------------|
|                     |        |      | Dose             | Green Signal | Actual Pct Green Cells | Normalized Pct Green Cells | Red Signal | Actual Pct Red Cells | Normalized Pct Red Cells |
|                     |        |      | 0.1 uM           | 99.35        | 0.89                   | 102.95                     | 96.82      | 0.07                 | -41.37                   |
|                     |        |      | 1 uM             | 93.55        | 0.78                   | 10.87                      | 106.92     | 0.11                 | -8.79                    |
| 10 uM               | 106.94 | 0.86 | 87.49            | 107.39       | 0.08                   | -21.29                     |            |                      |                          |

Compound

Normalized Values (A and B Sets)

Responses

| Cyromazine |        |      | Average Response |              |                        |                            |            |                      |                          |
|------------|--------|------|------------------|--------------|------------------------|----------------------------|------------|----------------------|--------------------------|
|            |        |      | Dose             | Green Signal | Actual Pct Green Cells | Normalized Pct Green Cells | Red Signal | Actual Pct Red Cells | Normalized Pct Red Cells |
|            |        |      | 0.1 uM           | 87.42        | 0.81                   | 323.81                     | 86.29      | 0.07                 | -26.00                   |
|            |        |      | 1 uM             | 105.82       | 0.86                   | 101.39                     | 84.46      | 0.09                 | -23.19                   |
| 10 uM      | 107.21 | 0.88 | 114.27           | 79.10        | 0.04                   | -43.99                     |            |                      |                          |

Compound

Normalized Values (A and B Sets)

Responses

| CYT387 |        |      | Average Response |              |                        |                            |            |                      |                          |
|--------|--------|------|------------------|--------------|------------------------|----------------------------|------------|----------------------|--------------------------|
|        |        |      | Dose             | Green Signal | Actual Pct Green Cells | Normalized Pct Green Cells | Red Signal | Actual Pct Red Cells | Normalized Pct Red Cells |
|        |        |      | 0.1 uM           | 72.73        | 0.63                   | 176.03                     | 79.10      | 0.03                 | -39.63                   |
|        |        |      | 1 uM             | 99.01        | 0.85                   | 79.28                      | 75.09      | 0.02                 | -45.06                   |
| 10 uM  | 121.95 | 0.95 | 451.11           | 112.73       | 0.14                   | 9.35                       |            |                      |                          |

Compound

Normalized Values (A and B Sets)

Responses

| CYT997 (Lexibulin) |        |      | Average Response |              |                        |                            |            |                      |                          |
|--------------------|--------|------|------------------|--------------|------------------------|----------------------------|------------|----------------------|--------------------------|
|                    |        |      | Dose             | Green Signal | Actual Pct Green Cells | Normalized Pct Green Cells | Red Signal | Actual Pct Red Cells | Normalized Pct Red Cells |
|                    |        |      | 0.1 uM           | 86.93        | 0.76                   | -35.26                     | 109.55     | 0.22                 | 49.32                    |
|                    |        |      | 1 uM             | 102.42       | 0.77                   | 38.75                      | 116.53     | 0.26                 | 58.94                    |
| 10 uM              | 105.24 | 0.89 | 156.48           | 109.12       | 0.19                   | 34.57                      |            |                      |                          |

Compound

Normalized Values (A and B Sets)

Responses

| Cytidine | Percent Green Cells (AB) |  | Percent Red Cells (AB) |  | Average Response |              |                        |                            |            |                      |                          |
|----------|--------------------------|--|------------------------|--|------------------|--------------|------------------------|----------------------------|------------|----------------------|--------------------------|
|          | Percent Response         |  | Percent Response       |  | Dose             | Green Signal | Actual Pct Green Cells | Normalized Pct Green Cells | Red Signal | Actual Pct Red Cells | Normalized Pct Red Cells |
|          | 100                      |  | 100                    |  | 0.1 uM           | 106.95       | 0.90                   | 103.94                     | 88.35      | 0.04                 | -52.86                   |
|          | 0                        |  | 0                      |  | 1 uM             | 106.31       | 0.88                   | 110.04                     | 106.74     | 0.09                 | -14.24                   |
|          | 0.1 uM                   |  | 0.1 uM                 |  | 10 uM            | 98.23        | 0.83                   | 66.27                      | 109.43     | 0.10                 | -16.46                   |
|          | 1 uM                     |  | 1 uM                   |  |                  |              |                        |                            |            |                      |                          |
|          | 10 uM                    |  | 10 uM                  |  |                  |              |                        |                            |            |                      |                          |

Compound

Normalized Values (A and B Sets)

Responses

| CZC24832 | Percent Green Cells (AB) |  | Percent Red Cells (AB) |  | Average Response |              |                        |                            |            |                      |                          |
|----------|--------------------------|--|------------------------|--|------------------|--------------|------------------------|----------------------------|------------|----------------------|--------------------------|
|          | Percent Response         |  | Percent Response       |  | Dose             | Green Signal | Actual Pct Green Cells | Normalized Pct Green Cells | Red Signal | Actual Pct Red Cells | Normalized Pct Red Cells |
|          | 100                      |  | 100                    |  | 0.1 uM           | 98.96        | 0.89                   | 104.35                     | 79.02      | 0.02                 | -61.64                   |
|          | 0                        |  | 0                      |  | 1 uM             | 95.66        | 0.90                   | 181.02                     | 79.69      | 0.04                 | -31.55                   |
|          | 0.1 uM                   |  | 0.1 uM                 |  | 10 uM            | 98.45        | 0.87                   | 60.31                      | 83.61      | 0.07                 | -20.00                   |
|          | 1 uM                     |  | 1 uM                   |  |                  |              |                        |                            |            |                      |                          |
|          | 10 uM                    |  | 10 uM                  |  |                  |              |                        |                            |            |                      |                          |

Compound

Normalized Values (A and B Sets)

Responses

| D-Mannitol | Percent Green Cells (AB) |  | Percent Red Cells (AB) |  | Average Response |              |                        |                            |            |                      |                          |
|------------|--------------------------|--|------------------------|--|------------------|--------------|------------------------|----------------------------|------------|----------------------|--------------------------|
|            | Percent Response         |  | Percent Response       |  | Dose             | Green Signal | Actual Pct Green Cells | Normalized Pct Green Cells | Red Signal | Actual Pct Red Cells | Normalized Pct Red Cells |
|            | 100                      |  | 100                    |  | 0.1 uM           | 106.98       | 0.96                   | 164.86                     | 74.02      | 0.03                 | -38.07                   |
|            | 0                        |  | 0                      |  | 1 uM             | 91.35        | 0.78                   | 33.98                      | 92.23      | 0.05                 | -33.12                   |
|            | 0.1 uM                   |  | 0.1 uM                 |  | 10 uM            | 87.77        | 0.87                   | 37.91                      | 91.19      | 0.04                 | -37.53                   |
|            | 1 uM                     |  | 1 uM                   |  |                  |              |                        |                            |            |                      |                          |
|            | 10 uM                    |  | 10 uM                  |  |                  |              |                        |                            |            |                      |                          |

Compound

Normalized Values (A and B Sets)

Responses

| D-Pantothenic acid | Percent Green Cells (AB) |  | Percent Red Cells (AB) |  | Average Response |              |                        |                            |            |                      |                          |
|--------------------|--------------------------|--|------------------------|--|------------------|--------------|------------------------|----------------------------|------------|----------------------|--------------------------|
|                    | Percent Response         |  | Percent Response       |  | Dose             | Green Signal | Actual Pct Green Cells | Normalized Pct Green Cells | Red Signal | Actual Pct Red Cells | Normalized Pct Red Cells |
|                    | 100                      |  | 100                    |  | 0.1 uM           | 107.48       | 0.93                   | 138.67                     | 109.81     | 0.16                 | 20.66                    |
|                    | 0                        |  | 0                      |  | 1 uM             | 93.03        | 0.77                   | 37.55                      | 73.39      | 0.03                 | -44.08                   |
|                    | 0.1 uM                   |  | 0.1 uM                 |  | 10 uM            | 102.22       | 0.91                   | 241.52                     | 95.62      | 0.08                 | -17.56                   |
|                    | 1 uM                     |  | 1 uM                   |  |                  |              |                        |                            |            |                      |                          |
|                    | 10 uM                    |  | 10 uM                  |  |                  |              |                        |                            |            |                      |                          |

Compound

Normalized Values (A and B Sets)

Responses

| Dabigatran Etxilate | Percent Green Cells (AB) |  | Percent Red Cells (AB) |  | Average Response |              |                        |                            |            |                      |                          |
|---------------------|--------------------------|--|------------------------|--|------------------|--------------|------------------------|----------------------------|------------|----------------------|--------------------------|
|                     | Percent Response         |  | Percent Response       |  | Dose             | Green Signal | Actual Pct Green Cells | Normalized Pct Green Cells | Red Signal | Actual Pct Red Cells | Normalized Pct Red Cells |
|                     | 100                      |  | 100                    |  | 0.1 uM           | 80.33        | 0.73                   | -86.01                     | 82.59      | 0.05                 | -32.07                   |
|                     | 0                        |  | 0                      |  | 1 uM             | 99.39        | 0.84                   | 82.10                      | 110.84     | 0.17                 | 20.94                    |
|                     | 0.1 uM                   |  | 0.1 uM                 |  | 10 uM            | 97.03        | 0.89                   | 318.94                     | 93.20      | 0.04                 | -37.74                   |
|                     | 1 uM                     |  | 1 uM                   |  |                  |              |                        |                            |            |                      |                          |
|                     | 10 uM                    |  | 10 uM                  |  |                  |              |                        |                            |            |                      |                          |

| Compound                       | Normalized Values (A and B Sets) | Responses               |              |                        |                            |            |                      |                          |
|--------------------------------|----------------------------------|-------------------------|--------------|------------------------|----------------------------|------------|----------------------|--------------------------|
| <b>Dabrafenib (GSK2118436)</b> |                                  | <b>Average Response</b> |              |                        |                            |            |                      |                          |
|                                |                                  | Dose                    | Green Signal | Actual Pct Green Cells | Normalized Pct Green Cells | Red Signal | Actual Pct Red Cells | Normalized Pct Red Cells |
|                                |                                  | 0.1 uM                  | 89.09        | 0.81                   | 6.45                       | 105.92     | 0.12                 | 1.45                     |
|                                |                                  | 1 uM                    | 95.08        | 0.79                   | 49.63                      | 88.69      | 0.05                 | -31.47                   |
| 10 uM                          | 108.31                           | 0.97                    | 451.38       | 88.80                  | 0.06                       | -29.88     |                      |                          |

| Compound                        | Normalized Values (A and B Sets) | Responses               |              |                        |                            |            |                      |                          |
|---------------------------------|----------------------------------|-------------------------|--------------|------------------------|----------------------------|------------|----------------------|--------------------------|
| <b>Daclatasvir (BMS-790052)</b> |                                  | <b>Average Response</b> |              |                        |                            |            |                      |                          |
|                                 |                                  | Dose                    | Green Signal | Actual Pct Green Cells | Normalized Pct Green Cells | Red Signal | Actual Pct Red Cells | Normalized Pct Red Cells |
|                                 |                                  | 0.1 uM                  | 100.07       | 0.88                   | 89.88                      | 103.51     | 0.11                 | -13.35                   |
|                                 |                                  | 1 uM                    | 112.63       | 0.91                   | 139.91                     | 105.47     | 0.12                 | -2.23                    |
| 10 uM                           | 110.83                           | 0.95                    | 146.93       | 111.65                 | 0.09                       | -14.36     |                      |                          |

| Compound                             | Normalized Values (A and B Sets) | Responses               |              |                        |                            |            |                      |                          |
|--------------------------------------|----------------------------------|-------------------------|--------------|------------------------|----------------------------|------------|----------------------|--------------------------|
| <b>Dacomitinib (PF299804, PF299)</b> |                                  | <b>Average Response</b> |              |                        |                            |            |                      |                          |
|                                      |                                  | Dose                    | Green Signal | Actual Pct Green Cells | Normalized Pct Green Cells | Red Signal | Actual Pct Red Cells | Normalized Pct Red Cells |
|                                      |                                  | 0.1 uM                  | 91.23        | 0.81                   | 18.10                      | 104.97     | 0.13                 | 7.28                     |
|                                      |                                  | 1 uM                    | 101.38       | 0.90                   | 109.12                     | 107.77     | 0.19                 | 29.28                    |
| 10 uM                                | 116.71                           | 0.98                    | 541.98       | 121.71                 | 0.18                       | 29.53      |                      |                          |

| Compound                                | Normalized Values (A and B Sets) | Responses               |              |                        |                            |            |                      |                          |
|-----------------------------------------|----------------------------------|-------------------------|--------------|------------------------|----------------------------|------------|----------------------|--------------------------|
| <b>Dalcetrapib (JTT-705, RO4607381)</b> |                                  | <b>Average Response</b> |              |                        |                            |            |                      |                          |
|                                         |                                  | Dose                    | Green Signal | Actual Pct Green Cells | Normalized Pct Green Cells | Red Signal | Actual Pct Red Cells | Normalized Pct Red Cells |
|                                         |                                  | 0.1 uM                  | 87.98        | 0.82                   | 17.81                      | 89.88      | 0.09                 | -11.21                   |
|                                         |                                  | 1 uM                    | 92.44        | 0.81                   | 47.63                      | 82.19      | 0.04                 | -37.25                   |
| 10 uM                                   | 93.15                            | 0.87                    | 198.34       | 74.64                  | 0.02                       | -46.56     |                      |                          |

| Compound                     | Normalized Values (A and B Sets) | Responses               |              |                        |                            |            |                      |                          |
|------------------------------|----------------------------------|-------------------------|--------------|------------------------|----------------------------|------------|----------------------|--------------------------|
| <b>Danoprevir (ITMN-191)</b> |                                  | <b>Average Response</b> |              |                        |                            |            |                      |                          |
|                              |                                  | Dose                    | Green Signal | Actual Pct Green Cells | Normalized Pct Green Cells | Red Signal | Actual Pct Red Cells | Normalized Pct Red Cells |
|                              |                                  | 0.1 uM                  | 95.87        | 0.83                   | 43.00                      | 114.12     | 0.13                 | -3.47                    |
|                              |                                  | 1 uM                    | 106.56       | 0.88                   | 94.00                      | 82.46      | 0.04                 | -38.69                   |
| 10 uM                        | 108.73                           | 0.92                    | 127.27       | 118.26                 | 0.11                       | -11.07     |                      |                          |

Compound

Normalized Values (A and B Sets)

Responses

| Danusertib (PHA-739358) | Percent Green Cells (AB) |  | Percent Red Cells (AB)  |  | Average Response |              |                        |                            |            |                      |                          |
|-------------------------|--------------------------|--|-------------------------|--|------------------|--------------|------------------------|----------------------------|------------|----------------------|--------------------------|
|                         | 100<br>Percent Response  |  | 100<br>Percent Response |  | Dose             | Green Signal | Actual Pct Green Cells | Normalized Pct Green Cells | Red Signal | Actual Pct Red Cells | Normalized Pct Red Cells |
|                         | 0.1 uM 1 uM 10 uM        |  | 0.1 uM 1 uM 10 uM       |  | 0.1 uM           | 88.82        | 0.84                   | 43.83                      | 85.96      | 0.04                 | -52.38                   |
|                         | concentration            |  | concentration           |  | 1 uM             | 95.56        | 0.89                   | 72.97                      | 84.56      | 0.06                 | -32.13                   |
|                         |                          |  |                         |  | 10 uM            | 109.15       | 0.84                   | 79.57                      | 125.79     | 0.16                 | 19.62                    |

Compound

Normalized Values (A and B Sets)

Responses

| Dapagliflozin | Percent Green Cells (AB) |  | Percent Red Cells (AB)  |  | Average Response |              |                        |                            |            |                      |                          |
|---------------|--------------------------|--|-------------------------|--|------------------|--------------|------------------------|----------------------------|------------|----------------------|--------------------------|
|               | 100<br>Percent Response  |  | 100<br>Percent Response |  | Dose             | Green Signal | Actual Pct Green Cells | Normalized Pct Green Cells | Red Signal | Actual Pct Red Cells | Normalized Pct Red Cells |
|               | 0.1 uM 1 uM 10 uM        |  | 0.1 uM 1 uM 10 uM       |  | 0.1 uM           | 104.23       | 0.90                   | 71.23                      | 85.00      | 0.04                 | -54.52                   |
|               | concentration            |  | concentration           |  | 1 uM             | 113.89       | 0.91                   | 129.21                     | 115.79     | 0.14                 | 8.08                     |
|               |                          |  |                         |  | 10 uM            | 111.02       | 0.90                   | 110.91                     | 108.05     | 0.09                 | -19.24                   |

Compound

Normalized Values (A and B Sets)

Responses

| Dapivirine (TMC120) | Percent Green Cells (AB) |  | Percent Red Cells (AB)  |  | Average Response                                                                                |              |                        |                            |            |                      |                          |
|---------------------|--------------------------|--|-------------------------|--|-------------------------------------------------------------------------------------------------|--------------|------------------------|----------------------------|------------|----------------------|--------------------------|
|                     | 100<br>Percent Response  |  | 100<br>Percent Response |  | Dose                                                                                            | Green Signal | Actual Pct Green Cells | Normalized Pct Green Cells | Red Signal | Actual Pct Red Cells | Normalized Pct Red Cells |
|                     | 0.1 uM 1 uM 10 uM        |  | 0.1 uM 1 uM 10 uM       |  | 0.1 uM                                                                                          | 92.17        | 0.91                   | 166.76                     | 94.23      | 0.07                 | -25.60                   |
|                     | concentration            |  | concentration           |  | 1 uM                                                                                            | 98.84        | 0.85                   | 90.04                      | 72.49      | 0.03                 | -53.99                   |
|                     |                          |  |                         |  | 10 uM <td>75.76</td> <td>0.65</td> <td>-75.70</td> <td>93.17</td> <td>0.10</td> <td>-12.27</td> | 75.76        | 0.65                   | -75.70                     | 93.17      | 0.10                 | -12.27                   |

Compound

Normalized Values (A and B Sets)

Responses

| Dapoxetine HCl | Percent Green Cells (AB) |  | Percent Red Cells (AB)  |  | Average Response                                                                                 |              |                        |                            |            |                      |                          |
|----------------|--------------------------|--|-------------------------|--|--------------------------------------------------------------------------------------------------|--------------|------------------------|----------------------------|------------|----------------------|--------------------------|
|                | 100<br>Percent Response  |  | 100<br>Percent Response |  | Dose                                                                                             | Green Signal | Actual Pct Green Cells | Normalized Pct Green Cells | Red Signal | Actual Pct Red Cells | Normalized Pct Red Cells |
|                | 0.1 uM 1 uM 10 uM        |  | 0.1 uM 1 uM 10 uM       |  | 0.1 uM                                                                                           | 93.32        | 0.79                   | -62.45                     | 84.75      | 0.05                 | -45.40                   |
|                | concentration            |  | concentration           |  | 1 uM                                                                                             | 93.76        | 0.74                   | 8.30                       | 78.84      | 0.05                 | -33.02                   |
|                |                          |  |                         |  | 10 uM <td>112.70</td> <td>0.92</td> <td>131.09</td> <td>113.37</td> <td>0.11</td> <td>-9.45</td> | 112.70       | 0.92                   | 131.09                     | 113.37     | 0.11                 | -9.45                    |

Compound

Normalized Values (A and B Sets)

Responses

| DAPT (GSI-IX) | Percent Green Cells (AB) |  | Percent Red Cells (AB)  |  | Average Response                                                                                |              |                        |                            |            |                      |                          |
|---------------|--------------------------|--|-------------------------|--|-------------------------------------------------------------------------------------------------|--------------|------------------------|----------------------------|------------|----------------------|--------------------------|
|               | 100<br>Percent Response  |  | 100<br>Percent Response |  | Dose                                                                                            | Green Signal | Actual Pct Green Cells | Normalized Pct Green Cells | Red Signal | Actual Pct Red Cells | Normalized Pct Red Cells |
|               | 0.1 uM 1 uM 10 uM        |  | 0.1 uM 1 uM 10 uM       |  | 0.1 uM                                                                                          | 87.61        | 0.82                   | 14.19                      | 72.40      | 0.02                 | -45.03                   |
|               | concentration            |  | concentration           |  | 1 uM                                                                                            | 88.21        | 0.78                   | 32.77                      | 79.99      | 0.02                 | -46.07                   |
|               |                          |  |                         |  | 10 uM <td>88.39</td> <td>0.82</td> <td>363.05</td> <td>80.09</td> <td>0.03</td> <td>-42.27</td> | 88.39        | 0.82                   | 363.05                     | 80.09      | 0.03                 | -42.27                   |



Compound

Normalized Values (A and B Sets)

Responses

| Daptomycin |       |      | Average Response |              |                        |                            |            |                      |                          |
|------------|-------|------|------------------|--------------|------------------------|----------------------------|------------|----------------------|--------------------------|
|            |       |      | Dose             | Green Signal | Actual Pct Green Cells | Normalized Pct Green Cells | Red Signal | Actual Pct Red Cells | Normalized Pct Red Cells |
|            |       |      | 0.1 uM           | 92.21        | 0.86                   | 61.87                      | 85.18      | 0.03                 | -57.81                   |
|            |       |      | 1 uM             | 96.48        | 0.83                   | 40.66                      | 74.90      | 0.02                 | -48.17                   |
| 10 uM      | 98.89 | 0.84 | 80.15            | 85.81        | 0.03                   | -39.66                     |            |                      |                          |

Compound

Normalized Values (A and B Sets)

Responses

| Darunavir Ethanolate |        |      | Average Response |              |                        |                            |            |                      |                          |
|----------------------|--------|------|------------------|--------------|------------------------|----------------------------|------------|----------------------|--------------------------|
|                      |        |      | Dose             | Green Signal | Actual Pct Green Cells | Normalized Pct Green Cells | Red Signal | Actual Pct Red Cells | Normalized Pct Red Cells |
|                      |        |      | 0.1 uM           | 97.67        | 0.89                   | 107.06                     | 83.03      | 0.05                 | -43.03                   |
|                      |        |      | 1 uM             | 109.35       | 0.88                   | 98.85                      | 99.93      | 0.09                 | -15.52                   |
| 10 uM                | 104.71 | 0.85 | 82.79            | 108.81       | 0.09                   | -18.52                     |            |                      |                          |

Compound

Normalized Values (A and B Sets)

Responses

| Dasatinib |        |      | Average Response |              |                        |                            |            |                      |                          |
|-----------|--------|------|------------------|--------------|------------------------|----------------------------|------------|----------------------|--------------------------|
|           |        |      | Dose             | Green Signal | Actual Pct Green Cells | Normalized Pct Green Cells | Red Signal | Actual Pct Red Cells | Normalized Pct Red Cells |
|           |        |      | 0.1 uM           | 107.97       | 0.86                   | 71.11                      | 84.00      | 0.05                 | -43.65                   |
|           |        |      | 1 uM             | 109.91       | 0.91                   | 65.37                      | 98.96      | 0.13                 | 26.85                    |
| 10 uM     | 104.64 | 0.91 | 89.28            | 83.92        | 0.12                   | 1.81                       |            |                      |                          |

Compound

Normalized Values (A and B Sets)

Responses

| DBeQ  |       |      | Average Response |              |                        |                            |            |                      |                          |
|-------|-------|------|------------------|--------------|------------------------|----------------------------|------------|----------------------|--------------------------|
|       |       |      | Dose             | Green Signal | Actual Pct Green Cells | Normalized Pct Green Cells | Red Signal | Actual Pct Red Cells | Normalized Pct Red Cells |
|       |       |      | 0.1 uM           | 97.39        | 0.86                   | 71.37                      | 98.86      | 0.09                 | -16.26                   |
|       |       |      | 1 uM             | 92.33        | 0.84                   | 137.77                     | 66.65      | 0.01                 | -44.74                   |
| 10 uM | 79.44 | 0.72 | -84.01           | 96.36        | 0.06                   | -26.19                     |            |                      |                          |

Compound

Normalized Values (A and B Sets)

Responses

| DCC-2036 (Rebastinib) |       |      | Average Response |              |                        |                            |            |                      |                          |
|-----------------------|-------|------|------------------|--------------|------------------------|----------------------------|------------|----------------------|--------------------------|
|                       |       |      | Dose             | Green Signal | Actual Pct Green Cells | Normalized Pct Green Cells | Red Signal | Actual Pct Red Cells | Normalized Pct Red Cells |
|                       |       |      | 0.1 uM           | 89.57        | 0.82                   | 21.48                      | 76.35      | 0.03                 | -39.89                   |
|                       |       |      | 1 uM             | 75.98        | 0.56                   | -92.36                     | 93.88      | 0.10                 | -9.97                    |
| 10 uM                 | 89.29 | 0.80 | 273.15           | 90.59        | 0.05                   | -33.39                     |            |                      |                          |



Compound

Normalized Values (A and B Sets)

Responses

| Decitabine | Percent Green Cells (AB) |  | Percent Red Cells (AB) |  | Average Response |              |                        |                            |            |                      |                          |
|------------|--------------------------|--|------------------------|--|------------------|--------------|------------------------|----------------------------|------------|----------------------|--------------------------|
|            | Percent Response         |  | Percent Response       |  | Dose             | Green Signal | Actual Pct Green Cells | Normalized Pct Green Cells | Red Signal | Actual Pct Red Cells | Normalized Pct Red Cells |
|            | 100                      |  | 100                    |  | 0.1 uM           | 101.61       | 0.89                   | 106.16                     | 85.72      | 0.06                 | -41.29                   |
|            | 0                        |  | 0                      |  | 1 uM             | 100.65       | 0.87                   | 16.62                      | 101.11     | 0.15                 | 24.29                    |
|            | 0.1 uM                   |  | 0.1 uM                 |  | 10 uM            | 109.99       | 0.92                   | 96.34                      | 104.78     | 0.20                 | 36.34                    |
|            | 1 uM                     |  | 1 uM                   |  |                  |              |                        |                            |            |                      |                          |
|            | 10 uM                    |  | 10 uM                  |  |                  |              |                        |                            |            |                      |                          |

Compound

Normalized Values (A and B Sets)

Responses

| Deferasirox | Percent Green Cells (AB) |  | Percent Red Cells (AB) |  | Average Response |              |                        |                            |            |                      |                          |
|-------------|--------------------------|--|------------------------|--|------------------|--------------|------------------------|----------------------------|------------|----------------------|--------------------------|
|             | Percent Response         |  | Percent Response       |  | Dose             | Green Signal | Actual Pct Green Cells | Normalized Pct Green Cells | Red Signal | Actual Pct Red Cells | Normalized Pct Red Cells |
|             | 100                      |  | 100                    |  | 0.1 uM           | 92.99        | 0.71                   | -77.39                     | 111.55     | 0.19                 | 41.03                    |
|             | 0                        |  | 0                      |  | 1 uM             | 78.73        | 0.66                   | 930.64                     | 91.84      | 0.12                 | 2.85                     |
|             | 0.1 uM                   |  | 0.1 uM                 |  | 10 uM            | 99.74        | 0.91                   | 94.71                      | 116.10     | 0.19                 | 35.01                    |
|             | 1 uM                     |  | 1 uM                   |  |                  |              |                        |                            |            |                      |                          |
|             | 10 uM                    |  | 10 uM                  |  |                  |              |                        |                            |            |                      |                          |

Compound

Normalized Values (A and B Sets)

Responses

| Degrasyn (WP1130) | Percent Green Cells (AB) |  | Percent Red Cells (AB) |  | Average Response |              |                        |                            |            |                      |                          |
|-------------------|--------------------------|--|------------------------|--|------------------|--------------|------------------------|----------------------------|------------|----------------------|--------------------------|
|                   | Percent Response         |  | Percent Response       |  | Dose             | Green Signal | Actual Pct Green Cells | Normalized Pct Green Cells | Red Signal | Actual Pct Red Cells | Normalized Pct Red Cells |
|                   | 100                      |  | 100                    |  | 0.1 uM           | 96.29        | 0.88                   | 86.48                      | 67.45      | 0.03                 | -43.32                   |
|                   | 0                        |  | 0                      |  | 1 uM             | 95.28        | 0.76                   | 35.30                      | 92.44      | 0.09                 | -16.37                   |
|                   | 0.1 uM                   |  | 0.1 uM                 |  | 10 uM            | 90.03        | 0.88                   | 234.30                     | 108.93     | 0.09                 | -18.06                   |
|                   | 1 uM                     |  | 1 uM                   |  |                  |              |                        |                            |            |                      |                          |
|                   | 10 uM                    |  | 10 uM                  |  |                  |              |                        |                            |            |                      |                          |

Compound

Normalized Values (A and B Sets)

Responses

| Deoxyarbutin | Percent Green Cells (AB) |  | Percent Red Cells (AB) |  | Average Response |              |                        |                            |            |                      |                          |
|--------------|--------------------------|--|------------------------|--|------------------|--------------|------------------------|----------------------------|------------|----------------------|--------------------------|
|              | Percent Response         |  | Percent Response       |  | Dose             | Green Signal | Actual Pct Green Cells | Normalized Pct Green Cells | Red Signal | Actual Pct Red Cells | Normalized Pct Red Cells |
|              | 100                      |  | 100                    |  | 0.1 uM           | 103.54       | 0.92                   | 151.31                     | 92.36      | 0.07                 | -30.31                   |
|              | 0                        |  | 0                      |  | 1 uM             | 78.43        | 0.62                   | -73.84                     | 83.48      | 0.04                 | -49.17                   |
|              | 0.1 uM                   |  | 0.1 uM                 |  | 10 uM            | 109.28       | 0.93                   | 156.30                     | 92.72      | 0.07                 | -28.95                   |
|              | 1 uM                     |  | 1 uM                   |  |                  |              |                        |                            |            |                      |                          |
|              | 10 uM                    |  | 10 uM                  |  |                  |              |                        |                            |            |                      |                          |

Compound

Normalized Values (A and B Sets)

Responses

| Deoxycorticosterone acetate | Percent Green Cells (AB) |  | Percent Red Cells (AB) |  | Average Response |              |                        |                            |            |                      |                          |
|-----------------------------|--------------------------|--|------------------------|--|------------------|--------------|------------------------|----------------------------|------------|----------------------|--------------------------|
|                             | Percent Response         |  | Percent Response       |  | Dose             | Green Signal | Actual Pct Green Cells | Normalized Pct Green Cells | Red Signal | Actual Pct Red Cells | Normalized Pct Red Cells |
|                             | 100                      |  | 100                    |  | 0.1 uM           | 99.03        | 0.91                   | 107.14                     | 84.20      | 0.06                 | -30.95                   |
|                             | 0                        |  | 0                      |  | 1 uM             | 92.86        | 0.82                   | 73.78                      | 92.05      | 0.07                 | -33.28                   |
|                             | 0.1 uM                   |  | 0.1 uM                 |  | 10 uM            | 97.97        | 0.84                   | 90.62                      | 77.54      | 0.03                 | -47.21                   |
|                             | 1 uM                     |  | 1 uM                   |  |                  |              |                        |                            |            |                      |                          |
|                             | 10 uM                    |  | 10 uM                  |  |                  |              |                        |                            |            |                      |                          |

Compound

Normalized Values (A and B Sets)

Responses

| <b>Desmethyl Erlotinib (CP-473420, OSI-774)</b> |       | <b>Average Response</b> |              |                        |                            |            |                      |                          |
|-------------------------------------------------|-------|-------------------------|--------------|------------------------|----------------------------|------------|----------------------|--------------------------|
|                                                 |       | Dose                    | Green Signal | Actual Pct Green Cells | Normalized Pct Green Cells | Red Signal | Actual Pct Red Cells | Normalized Pct Red Cells |
|                                                 |       | 0.1 uM                  | 101.43       | 0.91                   | 121.68                     | 101.26     | 0.13                 | 7.14                     |
|                                                 |       | 1 uM                    | 77.85        | 0.64                   | -24.02                     | 102.21     | 0.13                 | 2.05                     |
| 10 uM                                           | 92.84 | 0.89                    | -86.79       | 106.95                 | 0.12                       | -0.24      |                      |                          |

Compound

Normalized Values (A and B Sets)

Responses

| <b>Desonide</b> |       | <b>Average Response</b> |              |                        |                            |            |                      |                          |
|-----------------|-------|-------------------------|--------------|------------------------|----------------------------|------------|----------------------|--------------------------|
|                 |       | Dose                    | Green Signal | Actual Pct Green Cells | Normalized Pct Green Cells | Red Signal | Actual Pct Red Cells | Normalized Pct Red Cells |
|                 |       | 0.1 uM                  | 89.03        | 0.83                   | 44.24                      | 61.48      | 0.01                 | -70.96                   |
|                 |       | 1 uM                    | 105.16       | 0.95                   | 316.40                     | 66.85      | 0.01                 | -43.33                   |
| 10 uM           | 89.10 | 0.84                    | 31.67        | 77.07                  | 0.06                       | -25.49     |                      |                          |

Compound

Normalized Values (A and B Sets)

Responses

| <b>Desvenlafaxine</b> |        | <b>Average Response</b> |              |                        |                            |            |                      |                          |
|-----------------------|--------|-------------------------|--------------|------------------------|----------------------------|------------|----------------------|--------------------------|
|                       |        | Dose                    | Green Signal | Actual Pct Green Cells | Normalized Pct Green Cells | Red Signal | Actual Pct Red Cells | Normalized Pct Red Cells |
|                       |        | 0.1 uM                  | 101.90       | 0.91                   | 184.82                     | 84.16      | 0.06                 | -32.03                   |
|                       |        | 1 uM                    | 101.57       | 0.85                   | 89.89                      | 73.34      | 0.02                 | -57.32                   |
| 10 uM                 | 104.06 | 0.90                    | 139.29       | 88.95                  | 0.07                       | -25.21     |                      |                          |

Compound

Normalized Values (A and B Sets)

Responses

| <b>Desvenlafaxine Succinate</b> |       | <b>Average Response</b> |              |                        |                            |            |                      |                          |
|---------------------------------|-------|-------------------------|--------------|------------------------|----------------------------|------------|----------------------|--------------------------|
|                                 |       | Dose                    | Green Signal | Actual Pct Green Cells | Normalized Pct Green Cells | Red Signal | Actual Pct Red Cells | Normalized Pct Red Cells |
|                                 |       | 0.1 uM                  | 78.03        | 0.65                   | -794.59                    | 71.08      | 0.03                 | -50.25                   |
|                                 |       | 1 uM                    | 79.24        | 0.57                   | -117.18                    | 80.09      | 0.04                 | -45.10                   |
| 10 uM                           | 93.53 | 0.80                    | 1.63         | 104.95                 | 0.11                       | -6.22      |                      |                          |

Compound

Normalized Values (A and B Sets)

Responses

| <b>Detomidine HCl</b> |        | <b>Average Response</b> |              |                        |                            |            |                      |                          |
|-----------------------|--------|-------------------------|--------------|------------------------|----------------------------|------------|----------------------|--------------------------|
|                       |        | Dose                    | Green Signal | Actual Pct Green Cells | Normalized Pct Green Cells | Red Signal | Actual Pct Red Cells | Normalized Pct Red Cells |
|                       |        | 0.1 uM                  | 92.43        | 0.81                   | -22.42                     | 93.16      | 0.08                 | -36.33                   |
|                       |        | 1 uM                    | 107.04       | 0.92                   | 119.83                     | 66.17      | 0.02                 | -50.27                   |
| 10 uM                 | 108.03 | 0.87                    | 96.21        | 78.17                  | 0.05                       | -34.00     |                      |                          |

| Compound                    | Normalized Values (A and B Sets) | Responses                                                                                                                                                                                                                                                                                                                                                                                                                                                                                                                                                                                                                                                                     |                  |                        |                            |            |                      |                          |  |      |              |                        |                            |            |                      |                          |        |       |      |      |       |      |        |      |       |      |       |       |      |        |       |       |      |       |       |      |        |
|-----------------------------|----------------------------------|-------------------------------------------------------------------------------------------------------------------------------------------------------------------------------------------------------------------------------------------------------------------------------------------------------------------------------------------------------------------------------------------------------------------------------------------------------------------------------------------------------------------------------------------------------------------------------------------------------------------------------------------------------------------------------|------------------|------------------------|----------------------------|------------|----------------------|--------------------------|--|------|--------------|------------------------|----------------------------|------------|----------------------|--------------------------|--------|-------|------|------|-------|------|--------|------|-------|------|-------|-------|------|--------|-------|-------|------|-------|-------|------|--------|
| <b>Dexamethasone (DHAP)</b> |                                  | <table border="1"> <thead> <tr> <th colspan="7">Average Response</th> </tr> <tr> <th>Dose</th> <th>Green Signal</th> <th>Actual Pct Green Cells</th> <th>Normalized Pct Green Cells</th> <th>Red Signal</th> <th>Actual Pct Red Cells</th> <th>Normalized Pct Red Cells</th> </tr> </thead> <tbody> <tr> <td>0.1 uM</td> <td>88.35</td> <td>0.81</td> <td>4.01</td> <td>82.95</td> <td>0.04</td> <td>-51.62</td> </tr> <tr> <td>1 uM</td> <td>98.42</td> <td>0.84</td> <td>90.39</td> <td>72.51</td> <td>0.01</td> <td>-52.00</td> </tr> <tr> <td>10 uM</td> <td>85.60</td> <td>0.76</td> <td>17.97</td> <td>97.79</td> <td>0.05</td> <td>-30.33</td> </tr> </tbody> </table> | Average Response |                        |                            |            |                      |                          |  | Dose | Green Signal | Actual Pct Green Cells | Normalized Pct Green Cells | Red Signal | Actual Pct Red Cells | Normalized Pct Red Cells | 0.1 uM | 88.35 | 0.81 | 4.01 | 82.95 | 0.04 | -51.62 | 1 uM | 98.42 | 0.84 | 90.39 | 72.51 | 0.01 | -52.00 | 10 uM | 85.60 | 0.76 | 17.97 | 97.79 | 0.05 | -30.33 |
|                             |                                  | Average Response                                                                                                                                                                                                                                                                                                                                                                                                                                                                                                                                                                                                                                                              |                  |                        |                            |            |                      |                          |  |      |              |                        |                            |            |                      |                          |        |       |      |      |       |      |        |      |       |      |       |       |      |        |       |       |      |       |       |      |        |
|                             |                                  | Dose                                                                                                                                                                                                                                                                                                                                                                                                                                                                                                                                                                                                                                                                          | Green Signal     | Actual Pct Green Cells | Normalized Pct Green Cells | Red Signal | Actual Pct Red Cells | Normalized Pct Red Cells |  |      |              |                        |                            |            |                      |                          |        |       |      |      |       |      |        |      |       |      |       |       |      |        |       |       |      |       |       |      |        |
|                             |                                  | 0.1 uM                                                                                                                                                                                                                                                                                                                                                                                                                                                                                                                                                                                                                                                                        | 88.35            | 0.81                   | 4.01                       | 82.95      | 0.04                 | -51.62                   |  |      |              |                        |                            |            |                      |                          |        |       |      |      |       |      |        |      |       |      |       |       |      |        |       |       |      |       |       |      |        |
| 1 uM                        | 98.42                            | 0.84                                                                                                                                                                                                                                                                                                                                                                                                                                                                                                                                                                                                                                                                          | 90.39            | 72.51                  | 0.01                       | -52.00     |                      |                          |  |      |              |                        |                            |            |                      |                          |        |       |      |      |       |      |        |      |       |      |       |       |      |        |       |       |      |       |       |      |        |
| 10 uM                       | 85.60                            | 0.76                                                                                                                                                                                                                                                                                                                                                                                                                                                                                                                                                                                                                                                                          | 17.97            | 97.79                  | 0.05                       | -30.33     |                      |                          |  |      |              |                        |                            |            |                      |                          |        |       |      |      |       |      |        |      |       |      |       |       |      |        |       |       |      |       |       |      |        |

| Compound               | Normalized Values (A and B Sets) | Responses                                                                                                                                                                                                                                                                                                                                                                                                                                                                                                                                                                                                                                                                      |                  |                        |                            |            |                      |                          |  |      |              |                        |                            |            |                      |                          |        |       |      |       |       |      |        |      |       |      |       |       |      |        |       |       |      |       |       |      |        |
|------------------------|----------------------------------|--------------------------------------------------------------------------------------------------------------------------------------------------------------------------------------------------------------------------------------------------------------------------------------------------------------------------------------------------------------------------------------------------------------------------------------------------------------------------------------------------------------------------------------------------------------------------------------------------------------------------------------------------------------------------------|------------------|------------------------|----------------------------|------------|----------------------|--------------------------|--|------|--------------|------------------------|----------------------------|------------|----------------------|--------------------------|--------|-------|------|-------|-------|------|--------|------|-------|------|-------|-------|------|--------|-------|-------|------|-------|-------|------|--------|
| <b>Dexlansoprazole</b> |                                  | <table border="1"> <thead> <tr> <th colspan="7">Average Response</th> </tr> <tr> <th>Dose</th> <th>Green Signal</th> <th>Actual Pct Green Cells</th> <th>Normalized Pct Green Cells</th> <th>Red Signal</th> <th>Actual Pct Red Cells</th> <th>Normalized Pct Red Cells</th> </tr> </thead> <tbody> <tr> <td>0.1 uM</td> <td>87.68</td> <td>0.82</td> <td>48.52</td> <td>87.51</td> <td>0.05</td> <td>-37.20</td> </tr> <tr> <td>1 uM</td> <td>85.55</td> <td>0.71</td> <td>-2.12</td> <td>73.28</td> <td>0.02</td> <td>-56.02</td> </tr> <tr> <td>10 uM</td> <td>95.72</td> <td>0.82</td> <td>69.60</td> <td>74.91</td> <td>0.02</td> <td>-50.82</td> </tr> </tbody> </table> | Average Response |                        |                            |            |                      |                          |  | Dose | Green Signal | Actual Pct Green Cells | Normalized Pct Green Cells | Red Signal | Actual Pct Red Cells | Normalized Pct Red Cells | 0.1 uM | 87.68 | 0.82 | 48.52 | 87.51 | 0.05 | -37.20 | 1 uM | 85.55 | 0.71 | -2.12 | 73.28 | 0.02 | -56.02 | 10 uM | 95.72 | 0.82 | 69.60 | 74.91 | 0.02 | -50.82 |
|                        |                                  | Average Response                                                                                                                                                                                                                                                                                                                                                                                                                                                                                                                                                                                                                                                               |                  |                        |                            |            |                      |                          |  |      |              |                        |                            |            |                      |                          |        |       |      |       |       |      |        |      |       |      |       |       |      |        |       |       |      |       |       |      |        |
|                        |                                  | Dose                                                                                                                                                                                                                                                                                                                                                                                                                                                                                                                                                                                                                                                                           | Green Signal     | Actual Pct Green Cells | Normalized Pct Green Cells | Red Signal | Actual Pct Red Cells | Normalized Pct Red Cells |  |      |              |                        |                            |            |                      |                          |        |       |      |       |       |      |        |      |       |      |       |       |      |        |       |       |      |       |       |      |        |
|                        |                                  | 0.1 uM                                                                                                                                                                                                                                                                                                                                                                                                                                                                                                                                                                                                                                                                         | 87.68            | 0.82                   | 48.52                      | 87.51      | 0.05                 | -37.20                   |  |      |              |                        |                            |            |                      |                          |        |       |      |       |       |      |        |      |       |      |       |       |      |        |       |       |      |       |       |      |        |
| 1 uM                   | 85.55                            | 0.71                                                                                                                                                                                                                                                                                                                                                                                                                                                                                                                                                                                                                                                                           | -2.12            | 73.28                  | 0.02                       | -56.02     |                      |                          |  |      |              |                        |                            |            |                      |                          |        |       |      |       |       |      |        |      |       |      |       |       |      |        |       |       |      |       |       |      |        |
| 10 uM                  | 95.72                            | 0.82                                                                                                                                                                                                                                                                                                                                                                                                                                                                                                                                                                                                                                                                           | 69.60            | 74.91                  | 0.02                       | -50.82     |                      |                          |  |      |              |                        |                            |            |                      |                          |        |       |      |       |       |      |        |      |       |      |       |       |      |        |       |       |      |       |       |      |        |

| Compound               | Normalized Values (A and B Sets) | Responses                                                                                                                                                                                                                                                                                                                                                                                                                                                                                                                                                                                                                                                                          |                  |                        |                            |            |                      |                          |  |      |              |                        |                            |            |                      |                          |        |        |      |        |        |      |       |      |        |      |       |        |      |       |       |        |      |       |       |      |        |
|------------------------|----------------------------------|------------------------------------------------------------------------------------------------------------------------------------------------------------------------------------------------------------------------------------------------------------------------------------------------------------------------------------------------------------------------------------------------------------------------------------------------------------------------------------------------------------------------------------------------------------------------------------------------------------------------------------------------------------------------------------|------------------|------------------------|----------------------------|------------|----------------------|--------------------------|--|------|--------------|------------------------|----------------------------|------------|----------------------|--------------------------|--------|--------|------|--------|--------|------|-------|------|--------|------|-------|--------|------|-------|-------|--------|------|-------|-------|------|--------|
| <b>Dexmedetomidine</b> |                                  | <table border="1"> <thead> <tr> <th colspan="7">Average Response</th> </tr> <tr> <th>Dose</th> <th>Green Signal</th> <th>Actual Pct Green Cells</th> <th>Normalized Pct Green Cells</th> <th>Red Signal</th> <th>Actual Pct Red Cells</th> <th>Normalized Pct Red Cells</th> </tr> </thead> <tbody> <tr> <td>0.1 uM</td> <td>116.47</td> <td>0.97</td> <td>166.94</td> <td>100.05</td> <td>0.11</td> <td>-9.58</td> </tr> <tr> <td>1 uM</td> <td>102.22</td> <td>0.91</td> <td>26.53</td> <td>107.10</td> <td>0.16</td> <td>34.08</td> </tr> <tr> <td>10 uM</td> <td>102.49</td> <td>0.89</td> <td>79.55</td> <td>71.74</td> <td>0.06</td> <td>-26.53</td> </tr> </tbody> </table> | Average Response |                        |                            |            |                      |                          |  | Dose | Green Signal | Actual Pct Green Cells | Normalized Pct Green Cells | Red Signal | Actual Pct Red Cells | Normalized Pct Red Cells | 0.1 uM | 116.47 | 0.97 | 166.94 | 100.05 | 0.11 | -9.58 | 1 uM | 102.22 | 0.91 | 26.53 | 107.10 | 0.16 | 34.08 | 10 uM | 102.49 | 0.89 | 79.55 | 71.74 | 0.06 | -26.53 |
|                        |                                  | Average Response                                                                                                                                                                                                                                                                                                                                                                                                                                                                                                                                                                                                                                                                   |                  |                        |                            |            |                      |                          |  |      |              |                        |                            |            |                      |                          |        |        |      |        |        |      |       |      |        |      |       |        |      |       |       |        |      |       |       |      |        |
|                        |                                  | Dose                                                                                                                                                                                                                                                                                                                                                                                                                                                                                                                                                                                                                                                                               | Green Signal     | Actual Pct Green Cells | Normalized Pct Green Cells | Red Signal | Actual Pct Red Cells | Normalized Pct Red Cells |  |      |              |                        |                            |            |                      |                          |        |        |      |        |        |      |       |      |        |      |       |        |      |       |       |        |      |       |       |      |        |
|                        |                                  | 0.1 uM                                                                                                                                                                                                                                                                                                                                                                                                                                                                                                                                                                                                                                                                             | 116.47           | 0.97                   | 166.94                     | 100.05     | 0.11                 | -9.58                    |  |      |              |                        |                            |            |                      |                          |        |        |      |        |        |      |       |      |        |      |       |        |      |       |       |        |      |       |       |      |        |
| 1 uM                   | 102.22                           | 0.91                                                                                                                                                                                                                                                                                                                                                                                                                                                                                                                                                                                                                                                                               | 26.53            | 107.10                 | 0.16                       | 34.08      |                      |                          |  |      |              |                        |                            |            |                      |                          |        |        |      |        |        |      |       |      |        |      |       |        |      |       |       |        |      |       |       |      |        |
| 10 uM                  | 102.49                           | 0.89                                                                                                                                                                                                                                                                                                                                                                                                                                                                                                                                                                                                                                                                               | 79.55            | 71.74                  | 0.06                       | -26.53     |                      |                          |  |      |              |                        |                            |            |                      |                          |        |        |      |        |        |      |       |      |        |      |       |        |      |       |       |        |      |       |       |      |        |

| Compound                   | Normalized Values (A and B Sets) | Responses                                                                                                                                                                                                                                                                                                                                                                                                                                                                                                                                                                                                                                                                       |                  |                        |                            |            |                      |                          |  |      |              |                        |                            |            |                      |                          |        |       |      |       |       |      |        |      |        |      |       |       |      |        |       |       |      |       |       |      |        |
|----------------------------|----------------------------------|---------------------------------------------------------------------------------------------------------------------------------------------------------------------------------------------------------------------------------------------------------------------------------------------------------------------------------------------------------------------------------------------------------------------------------------------------------------------------------------------------------------------------------------------------------------------------------------------------------------------------------------------------------------------------------|------------------|------------------------|----------------------------|------------|----------------------|--------------------------|--|------|--------------|------------------------|----------------------------|------------|----------------------|--------------------------|--------|-------|------|-------|-------|------|--------|------|--------|------|-------|-------|------|--------|-------|-------|------|-------|-------|------|--------|
| <b>Dexmedetomidine HCl</b> |                                  | <table border="1"> <thead> <tr> <th colspan="7">Average Response</th> </tr> <tr> <th>Dose</th> <th>Green Signal</th> <th>Actual Pct Green Cells</th> <th>Normalized Pct Green Cells</th> <th>Red Signal</th> <th>Actual Pct Red Cells</th> <th>Normalized Pct Red Cells</th> </tr> </thead> <tbody> <tr> <td>0.1 uM</td> <td>95.21</td> <td>0.85</td> <td>56.55</td> <td>83.79</td> <td>0.04</td> <td>-50.30</td> </tr> <tr> <td>1 uM</td> <td>101.97</td> <td>0.85</td> <td>67.60</td> <td>86.22</td> <td>0.03</td> <td>-42.94</td> </tr> <tr> <td>10 uM</td> <td>99.28</td> <td>0.83</td> <td>69.08</td> <td>88.16</td> <td>0.03</td> <td>-40.70</td> </tr> </tbody> </table> | Average Response |                        |                            |            |                      |                          |  | Dose | Green Signal | Actual Pct Green Cells | Normalized Pct Green Cells | Red Signal | Actual Pct Red Cells | Normalized Pct Red Cells | 0.1 uM | 95.21 | 0.85 | 56.55 | 83.79 | 0.04 | -50.30 | 1 uM | 101.97 | 0.85 | 67.60 | 86.22 | 0.03 | -42.94 | 10 uM | 99.28 | 0.83 | 69.08 | 88.16 | 0.03 | -40.70 |
|                            |                                  | Average Response                                                                                                                                                                                                                                                                                                                                                                                                                                                                                                                                                                                                                                                                |                  |                        |                            |            |                      |                          |  |      |              |                        |                            |            |                      |                          |        |       |      |       |       |      |        |      |        |      |       |       |      |        |       |       |      |       |       |      |        |
|                            |                                  | Dose                                                                                                                                                                                                                                                                                                                                                                                                                                                                                                                                                                                                                                                                            | Green Signal     | Actual Pct Green Cells | Normalized Pct Green Cells | Red Signal | Actual Pct Red Cells | Normalized Pct Red Cells |  |      |              |                        |                            |            |                      |                          |        |       |      |       |       |      |        |      |        |      |       |       |      |        |       |       |      |       |       |      |        |
|                            |                                  | 0.1 uM                                                                                                                                                                                                                                                                                                                                                                                                                                                                                                                                                                                                                                                                          | 95.21            | 0.85                   | 56.55                      | 83.79      | 0.04                 | -50.30                   |  |      |              |                        |                            |            |                      |                          |        |       |      |       |       |      |        |      |        |      |       |       |      |        |       |       |      |       |       |      |        |
| 1 uM                       | 101.97                           | 0.85                                                                                                                                                                                                                                                                                                                                                                                                                                                                                                                                                                                                                                                                            | 67.60            | 86.22                  | 0.03                       | -42.94     |                      |                          |  |      |              |                        |                            |            |                      |                          |        |       |      |       |       |      |        |      |        |      |       |       |      |        |       |       |      |       |       |      |        |
| 10 uM                      | 99.28                            | 0.83                                                                                                                                                                                                                                                                                                                                                                                                                                                                                                                                                                                                                                                                            | 69.08            | 88.16                  | 0.03                       | -40.70     |                      |                          |  |      |              |                        |                            |            |                      |                          |        |       |      |       |       |      |        |      |        |      |       |       |      |        |       |       |      |       |       |      |        |

| Compound                                   | Normalized Values (A and B Sets) | Responses                                                                                                                                                                                                                                                                                                                                                                                                                                                                                                                                                                                                                                                                        |                  |                        |                            |            |                      |                          |  |      |              |                        |                            |            |                      |                          |        |       |      |       |       |      |        |      |        |      |        |       |      |        |       |       |      |       |       |      |        |
|--------------------------------------------|----------------------------------|----------------------------------------------------------------------------------------------------------------------------------------------------------------------------------------------------------------------------------------------------------------------------------------------------------------------------------------------------------------------------------------------------------------------------------------------------------------------------------------------------------------------------------------------------------------------------------------------------------------------------------------------------------------------------------|------------------|------------------------|----------------------------|------------|----------------------|--------------------------|--|------|--------------|------------------------|----------------------------|------------|----------------------|--------------------------|--------|-------|------|-------|-------|------|--------|------|--------|------|--------|-------|------|--------|-------|-------|------|-------|-------|------|--------|
| <b>Dexrazoxane HCl (ICRF-187, ADR-529)</b> |                                  | <table border="1"> <thead> <tr> <th colspan="7">Average Response</th> </tr> <tr> <th>Dose</th> <th>Green Signal</th> <th>Actual Pct Green Cells</th> <th>Normalized Pct Green Cells</th> <th>Red Signal</th> <th>Actual Pct Red Cells</th> <th>Normalized Pct Red Cells</th> </tr> </thead> <tbody> <tr> <td>0.1 uM</td> <td>93.99</td> <td>0.85</td> <td>47.54</td> <td>93.54</td> <td>0.05</td> <td>-46.92</td> </tr> <tr> <td>1 uM</td> <td>100.54</td> <td>0.89</td> <td>109.36</td> <td>79.18</td> <td>0.02</td> <td>-48.18</td> </tr> <tr> <td>10 uM</td> <td>90.42</td> <td>0.78</td> <td>39.13</td> <td>97.95</td> <td>0.06</td> <td>-31.89</td> </tr> </tbody> </table> | Average Response |                        |                            |            |                      |                          |  | Dose | Green Signal | Actual Pct Green Cells | Normalized Pct Green Cells | Red Signal | Actual Pct Red Cells | Normalized Pct Red Cells | 0.1 uM | 93.99 | 0.85 | 47.54 | 93.54 | 0.05 | -46.92 | 1 uM | 100.54 | 0.89 | 109.36 | 79.18 | 0.02 | -48.18 | 10 uM | 90.42 | 0.78 | 39.13 | 97.95 | 0.06 | -31.89 |
|                                            |                                  | Average Response                                                                                                                                                                                                                                                                                                                                                                                                                                                                                                                                                                                                                                                                 |                  |                        |                            |            |                      |                          |  |      |              |                        |                            |            |                      |                          |        |       |      |       |       |      |        |      |        |      |        |       |      |        |       |       |      |       |       |      |        |
|                                            |                                  | Dose                                                                                                                                                                                                                                                                                                                                                                                                                                                                                                                                                                                                                                                                             | Green Signal     | Actual Pct Green Cells | Normalized Pct Green Cells | Red Signal | Actual Pct Red Cells | Normalized Pct Red Cells |  |      |              |                        |                            |            |                      |                          |        |       |      |       |       |      |        |      |        |      |        |       |      |        |       |       |      |       |       |      |        |
|                                            |                                  | 0.1 uM                                                                                                                                                                                                                                                                                                                                                                                                                                                                                                                                                                                                                                                                           | 93.99            | 0.85                   | 47.54                      | 93.54      | 0.05                 | -46.92                   |  |      |              |                        |                            |            |                      |                          |        |       |      |       |       |      |        |      |        |      |        |       |      |        |       |       |      |       |       |      |        |
| 1 uM                                       | 100.54                           | 0.89                                                                                                                                                                                                                                                                                                                                                                                                                                                                                                                                                                                                                                                                             | 109.36           | 79.18                  | 0.02                       | -48.18     |                      |                          |  |      |              |                        |                            |            |                      |                          |        |       |      |       |       |      |        |      |        |      |        |       |      |        |       |       |      |       |       |      |        |
| 10 uM                                      | 90.42                            | 0.78                                                                                                                                                                                                                                                                                                                                                                                                                                                                                                                                                                                                                                                                             | 39.13            | 97.95                  | 0.06                       | -31.89     |                      |                          |  |      |              |                        |                            |            |                      |                          |        |       |      |       |       |      |        |      |        |      |        |       |      |        |       |       |      |       |       |      |        |

Compound

Normalized Values (A and B Sets)

Responses

| Dextrose | Percent Green Cells (AB) |      | Percent Red Cells (AB) |        | Average Response |              |                        |                            |            |                      |                          |       |       |
|----------|--------------------------|------|------------------------|--------|------------------|--------------|------------------------|----------------------------|------------|----------------------|--------------------------|-------|-------|
|          | Percent Response         |      | Percent Response       |        | Dose             | Green Signal | Actual Pct Green Cells | Normalized Pct Green Cells | Red Signal | Actual Pct Red Cells | Normalized Pct Red Cells |       |       |
|          | concentration            |      | concentration          |        | 0.1 uM           | 1 uM         | 10 uM                  | 0.1 uM                     | 1 uM       | 10 uM                | 0.1 uM                   | 1 uM  | 10 uM |
|          | 0.1 uM                   | 1 uM | 10 uM                  | 0.1 uM | 1 uM             | 10 uM        | 0.1 uM                 | 1 uM                       | 10 uM      | 0.1 uM               | 1 uM                     | 10 uM |       |
|          | 95.15                    | 0.87 | 84.36                  | 93.93  | 0.09             | -21.20       |                        |                            |            |                      |                          |       |       |
|          | 93.09                    | 0.82 | 686.41                 | 71.84  | 0.03             | -37.68       |                        |                            |            |                      |                          |       |       |
|          | 99.27                    | 0.88 | 62.44                  | 74.55  | 0.04             | -35.38       |                        |                            |            |                      |                          |       |       |

Compound

Normalized Values (A and B Sets)

Responses

| DFMO | Percent Green Cells (AB) |      | Percent Red Cells (AB) |        | Average Response |              |                        |                            |            |                      |                          |       |       |
|------|--------------------------|------|------------------------|--------|------------------|--------------|------------------------|----------------------------|------------|----------------------|--------------------------|-------|-------|
|      | Percent Response         |      | Percent Response       |        | Dose             | Green Signal | Actual Pct Green Cells | Normalized Pct Green Cells | Red Signal | Actual Pct Red Cells | Normalized Pct Red Cells |       |       |
|      | concentration            |      | concentration          |        | 0.1 uM           | 1 uM         | 10 uM                  | 0.1 uM                     | 1 uM       | 10 uM                | 0.1 uM                   | 1 uM  | 10 uM |
|      | 0.1 uM                   | 1 uM | 10 uM                  | 0.1 uM | 1 uM             | 10 uM        | 0.1 uM                 | 1 uM                       | 10 uM      | 0.1 uM               | 1 uM                     | 10 uM |       |
|      | 93.83                    | 0.84 | 48.44                  | 72.88  | 0.01             | -68.74       |                        |                            |            |                      |                          |       |       |
|      | 101.49                   | 0.90 | 283.92                 | 62.47  | 0.01             | -44.82       |                        |                            |            |                      |                          |       |       |
|      | 86.22                    | 0.82 | 6.15                   | 73.40  | 0.05             | -31.16       |                        |                            |            |                      |                          |       |       |

Compound

Normalized Values (A and B Sets)

Responses

| Dichlorisone Acetate | Percent Green Cells (AB) |      | Percent Red Cells (AB) |        | Average Response |              |                        |                            |            |                      |                          |       |       |
|----------------------|--------------------------|------|------------------------|--------|------------------|--------------|------------------------|----------------------------|------------|----------------------|--------------------------|-------|-------|
|                      | Percent Response         |      | Percent Response       |        | Dose             | Green Signal | Actual Pct Green Cells | Normalized Pct Green Cells | Red Signal | Actual Pct Red Cells | Normalized Pct Red Cells |       |       |
|                      | concentration            |      | concentration          |        | 0.1 uM           | 1 uM         | 10 uM                  | 0.1 uM                     | 1 uM       | 10 uM                | 0.1 uM                   | 1 uM  | 10 uM |
|                      | 0.1 uM                   | 1 uM | 10 uM                  | 0.1 uM | 1 uM             | 10 uM        | 0.1 uM                 | 1 uM                       | 10 uM      | 0.1 uM               | 1 uM                     | 10 uM |       |
|                      | 96.47                    | 0.91 | 146.16                 | 86.74  | 0.06             | -32.35       |                        |                            |            |                      |                          |       |       |
|                      | 94.53                    | 0.80 | 50.25                  | 87.76  | 0.05             | -41.60       |                        |                            |            |                      |                          |       |       |
|                      | 100.86                   | 0.90 | 118.92                 | 80.11  | 0.04             | -41.82       |                        |                            |            |                      |                          |       |       |

Compound

Normalized Values (A and B Sets)

Responses

| Diclofenac Diethylamine | Percent Green Cells (AB) |      | Percent Red Cells (AB) |        | Average Response |              |                        |                            |            |                      |                          |       |       |
|-------------------------|--------------------------|------|------------------------|--------|------------------|--------------|------------------------|----------------------------|------------|----------------------|--------------------------|-------|-------|
|                         | Percent Response         |      | Percent Response       |        | Dose             | Green Signal | Actual Pct Green Cells | Normalized Pct Green Cells | Red Signal | Actual Pct Red Cells | Normalized Pct Red Cells |       |       |
|                         | concentration            |      | concentration          |        | 0.1 uM           | 1 uM         | 10 uM                  | 0.1 uM                     | 1 uM       | 10 uM                | 0.1 uM                   | 1 uM  | 10 uM |
|                         | 0.1 uM                   | 1 uM | 10 uM                  | 0.1 uM | 1 uM             | 10 uM        | 0.1 uM                 | 1 uM                       | 10 uM      | 0.1 uM               | 1 uM                     | 10 uM |       |
|                         | 112.84                   | 0.93 | 138.02                 | 98.70  | 0.14             | 7.86         |                        |                            |            |                      |                          |       |       |
|                         | 98.56                    | 0.80 | 56.50                  | 116.40 | 0.22             | 42.90        |                        |                            |            |                      |                          |       |       |
|                         | 86.54                    | 0.69 | 29.61                  | 79.68  | 0.03             | -48.71       |                        |                            |            |                      |                          |       |       |

Compound

Normalized Values (A and B Sets)

Responses

| Diclofenac Potassium | Percent Green Cells (AB) |      | Percent Red Cells (AB) |        | Average Response |              |                        |                            |            |                      |                          |       |       |
|----------------------|--------------------------|------|------------------------|--------|------------------|--------------|------------------------|----------------------------|------------|----------------------|--------------------------|-------|-------|
|                      | Percent Response         |      | Percent Response       |        | Dose             | Green Signal | Actual Pct Green Cells | Normalized Pct Green Cells | Red Signal | Actual Pct Red Cells | Normalized Pct Red Cells |       |       |
|                      | concentration            |      | concentration          |        | 0.1 uM           | 1 uM         | 10 uM                  | 0.1 uM                     | 1 uM       | 10 uM                | 0.1 uM                   | 1 uM  | 10 uM |
|                      | 0.1 uM                   | 1 uM | 10 uM                  | 0.1 uM | 1 uM             | 10 uM        | 0.1 uM                 | 1 uM                       | 10 uM      | 0.1 uM               | 1 uM                     | 10 uM |       |
|                      | 90.64                    | 0.82 | 5.74                   | 81.81  | 0.06             | -34.16       |                        |                            |            |                      |                          |       |       |
|                      | 102.41                   | 0.85 | 95.51                  | 86.17  | 0.06             | -37.53       |                        |                            |            |                      |                          |       |       |
|                      | 90.97                    | 0.74 | 31.55                  | 95.98  | 0.08             | -19.01       |                        |                            |            |                      |                          |       |       |

Compound

Normalized Values (A and B Sets)

Responses

| Dicloxacillin Sodium | Percent Green Cells (AB) |  | Percent Red Cells (AB) |       | Average Response |              |                        |                            |            |                      |                          |
|----------------------|--------------------------|--|------------------------|-------|------------------|--------------|------------------------|----------------------------|------------|----------------------|--------------------------|
|                      | Percent Response         |  | Percent Response       |       | Dose             | Green Signal | Actual Pct Green Cells | Normalized Pct Green Cells | Red Signal | Actual Pct Red Cells | Normalized Pct Red Cells |
|                      | 0.1 uM 1 uM 10 uM        |  | 0.1 uM 1 uM 10 uM      |       | 0.1 uM           | 108.32       | 0.97                   | 276.13                     | 89.82      | 0.07                 | -29.96                   |
|                      | concentration            |  | concentration          |       | 1 uM             | 95.95        | 0.81                   | 65.37                      | 87.59      | 0.07                 | -33.46                   |
|                      |                          |  |                        | 10 uM | 91.84            | 0.80         | 59.83                  | 75.64                      | 0.02       | -54.84               |                          |

Compound

Normalized Values (A and B Sets)

Responses

| Dienogest | Percent Green Cells (AB) |  | Percent Red Cells (AB) |                                                                                                | Average Response |              |                        |                            |            |                      |                          |
|-----------|--------------------------|--|------------------------|------------------------------------------------------------------------------------------------|------------------|--------------|------------------------|----------------------------|------------|----------------------|--------------------------|
|           | Percent Response         |  | Percent Response       |                                                                                                | Dose             | Green Signal | Actual Pct Green Cells | Normalized Pct Green Cells | Red Signal | Actual Pct Red Cells | Normalized Pct Red Cells |
|           | 0.1 uM 1 uM 10 uM        |  | 0.1 uM 1 uM 10 uM      |                                                                                                | 0.1 uM           | 81.02        | 0.72                   | -83.94                     | 84.71      | 0.04                 | -51.45                   |
|           | concentration            |  | concentration          |                                                                                                | 1 uM             | 94.04        | 0.83                   | 39.70                      | 111.27     | 0.10                 | -11.91                   |
|           |                          |  |                        | 10 uM <td>84.17</td> <td>0.72</td> <td>-0.30</td> <td>95.06</td> <td>0.04</td> <td>-37.38</td> | 84.17            | 0.72         | -0.30                  | 95.06                      | 0.04       | -37.38               |                          |

Compound

Normalized Values (A and B Sets)

Responses

| Difluprednate | Percent Green Cells (AB) |  | Percent Red Cells (AB) |                                                                                                | Average Response |              |                        |                            |            |                      |                          |
|---------------|--------------------------|--|------------------------|------------------------------------------------------------------------------------------------|------------------|--------------|------------------------|----------------------------|------------|----------------------|--------------------------|
|               | Percent Response         |  | Percent Response       |                                                                                                | Dose             | Green Signal | Actual Pct Green Cells | Normalized Pct Green Cells | Red Signal | Actual Pct Red Cells | Normalized Pct Red Cells |
|               | 0.1 uM 1 uM 10 uM        |  | 0.1 uM 1 uM 10 uM      |                                                                                                | 0.1 uM           | 93.46        | 0.91                   | 160.74                     | 77.32      | 0.03                 | -46.02                   |
|               | concentration            |  | concentration          |                                                                                                | 1 uM             | 93.46        | 0.83                   | 76.89                      | 67.35      | 0.01                 | -62.22                   |
|               |                          |  |                        | 10 uM <td>87.07</td> <td>0.81</td> <td>26.39</td> <td>60.66</td> <td>0.01</td> <td>-59.29</td> | 87.07            | 0.81         | 26.39                  | 60.66                      | 0.01       | -59.29               |                          |

Compound

Normalized Values (A and B Sets)

Responses

| Dihydroartemisinin (DHA) | Percent Green Cells (AB) |  | Percent Red Cells (AB) |                                                                                                  | Average Response |              |                        |                            |            |                      |                          |
|--------------------------|--------------------------|--|------------------------|--------------------------------------------------------------------------------------------------|------------------|--------------|------------------------|----------------------------|------------|----------------------|--------------------------|
|                          | Percent Response         |  | Percent Response       |                                                                                                  | Dose             | Green Signal | Actual Pct Green Cells | Normalized Pct Green Cells | Red Signal | Actual Pct Red Cells | Normalized Pct Red Cells |
|                          | 0.1 uM 1 uM 10 uM        |  | 0.1 uM 1 uM 10 uM      |                                                                                                  | 0.1 uM           | 90.85        | 0.86                   | 76.27                      | 86.54      | 0.05                 | -46.06                   |
|                          | concentration            |  | concentration          |                                                                                                  | 1 uM             | 113.76       | 0.94                   | 195.88                     | 84.93      | 0.07                 | -18.42                   |
|                          |                          |  |                        | 10 uM <td>104.82</td> <td>0.93</td> <td>112.20</td> <td>105.38</td> <td>0.20</td> <td>34.65</td> | 104.82           | 0.93         | 112.20                 | 105.38                     | 0.20       | 34.65                |                          |

Compound

Normalized Values (A and B Sets)

Responses

| Dihydromyricetin | Percent Green Cells (AB) |  | Percent Red Cells (AB) |                                                                                                 | Average Response |              |                        |                            |            |                      |                          |
|------------------|--------------------------|--|------------------------|-------------------------------------------------------------------------------------------------|------------------|--------------|------------------------|----------------------------|------------|----------------------|--------------------------|
|                  | Percent Response         |  | Percent Response       |                                                                                                 | Dose             | Green Signal | Actual Pct Green Cells | Normalized Pct Green Cells | Red Signal | Actual Pct Red Cells | Normalized Pct Red Cells |
|                  | 0.1 uM 1 uM 10 uM        |  | 0.1 uM 1 uM 10 uM      |                                                                                                 | 0.1 uM           | 87.48        | 0.82                   | 30.34                      | 95.45      | 0.07                 | -21.86                   |
|                  | concentration            |  | concentration          |                                                                                                 | 1 uM             | 83.69        | 0.70                   | -4.94                      | 84.24      | 0.04                 | -37.81                   |
|                  |                          |  |                        | 10 uM <td>90.19</td> <td>0.85</td> <td>160.89</td> <td>109.01</td> <td>0.12</td> <td>-1.00</td> | 90.19            | 0.85         | 160.89                 | 109.01                     | 0.12       | -1.00                |                          |





| Compound                         | Normalized Values (A and B Sets) | Responses                                                                                                                                                                                                                                                                                                                                                                                                                                                                                                                                                                                                                                                                           |                            |                        |                            |                          |                      |                          |       |       |              |                        |                            |            |                      |                          |        |        |      |        |        |      |        |      |        |      |        |        |      |       |       |        |      |        |        |      |        |
|----------------------------------|----------------------------------|-------------------------------------------------------------------------------------------------------------------------------------------------------------------------------------------------------------------------------------------------------------------------------------------------------------------------------------------------------------------------------------------------------------------------------------------------------------------------------------------------------------------------------------------------------------------------------------------------------------------------------------------------------------------------------------|----------------------------|------------------------|----------------------------|--------------------------|----------------------|--------------------------|-------|-------|--------------|------------------------|----------------------------|------------|----------------------|--------------------------|--------|--------|------|--------|--------|------|--------|------|--------|------|--------|--------|------|-------|-------|--------|------|--------|--------|------|--------|
|                                  |                                  | <table border="1"> <tr> <td>1 uM</td> <td>86.73</td> <td>0.76</td> <td>18.28</td> <td>108.48</td> <td>0.12</td> <td>-2.17</td> </tr> <tr> <td>10 uM</td> <td>88.26</td> <td>0.86</td> <td>-61.45</td> <td>70.34</td> <td>0.02</td> <td>-50.38</td> </tr> </table>                                                                                                                                                                                                                                                                                                                                                                                                                   | 1 uM                       | 86.73                  | 0.76                       | 18.28                    | 108.48               | 0.12                     | -2.17 | 10 uM | 88.26        | 0.86                   | -61.45                     | 70.34      | 0.02                 | -50.38                   |        |        |      |        |        |      |        |      |        |      |        |        |      |       |       |        |      |        |        |      |        |
| 1 uM                             | 86.73                            | 0.76                                                                                                                                                                                                                                                                                                                                                                                                                                                                                                                                                                                                                                                                                | 18.28                      | 108.48                 | 0.12                       | -2.17                    |                      |                          |       |       |              |                        |                            |            |                      |                          |        |        |      |        |        |      |        |      |        |      |        |        |      |       |       |        |      |        |        |      |        |
| 10 uM                            | 88.26                            | 0.86                                                                                                                                                                                                                                                                                                                                                                                                                                                                                                                                                                                                                                                                                | -61.45                     | 70.34                  | 0.02                       | -50.38                   |                      |                          |       |       |              |                        |                            |            |                      |                          |        |        |      |        |        |      |        |      |        |      |        |        |      |       |       |        |      |        |        |      |        |
| Compound                         | Normalized Values (A and B Sets) | Responses                                                                                                                                                                                                                                                                                                                                                                                                                                                                                                                                                                                                                                                                           |                            |                        |                            |                          |                      |                          |       |       |              |                        |                            |            |                      |                          |        |        |      |        |        |      |        |      |        |      |        |        |      |       |       |        |      |        |        |      |        |
| <b>Dirithromycin</b>             |                                  | <table border="1"> <thead> <tr> <th colspan="7">Average Response</th> </tr> <tr> <th>Dose</th> <th>Green Signal</th> <th>Actual Pct Green Cells</th> <th>Normalized Pct Green Cells</th> <th>Red Signal</th> <th>Actual Pct Red Cells</th> <th>Normalized Pct Red Cells</th> </tr> </thead> <tbody> <tr> <td>0.1 uM</td> <td>85.15</td> <td>0.83</td> <td>131.22</td> <td>72.90</td> <td>0.03</td> <td>-50.66</td> </tr> <tr> <td>1 uM</td> <td>101.70</td> <td>0.87</td> <td>106.59</td> <td>111.77</td> <td>0.17</td> <td>17.20</td> </tr> <tr> <td>10 uM</td> <td>95.72</td> <td>0.85</td> <td>117.45</td> <td>75.24</td> <td>0.02</td> <td>-53.67</td> </tr> </tbody> </table>  | Average Response           |                        |                            |                          |                      |                          |       | Dose  | Green Signal | Actual Pct Green Cells | Normalized Pct Green Cells | Red Signal | Actual Pct Red Cells | Normalized Pct Red Cells | 0.1 uM | 85.15  | 0.83 | 131.22 | 72.90  | 0.03 | -50.66 | 1 uM | 101.70 | 0.87 | 106.59 | 111.77 | 0.17 | 17.20 | 10 uM | 95.72  | 0.85 | 117.45 | 75.24  | 0.02 | -53.67 |
|                                  |                                  | Average Response                                                                                                                                                                                                                                                                                                                                                                                                                                                                                                                                                                                                                                                                    |                            |                        |                            |                          |                      |                          |       |       |              |                        |                            |            |                      |                          |        |        |      |        |        |      |        |      |        |      |        |        |      |       |       |        |      |        |        |      |        |
|                                  |                                  | Dose                                                                                                                                                                                                                                                                                                                                                                                                                                                                                                                                                                                                                                                                                | Green Signal               | Actual Pct Green Cells | Normalized Pct Green Cells | Red Signal               | Actual Pct Red Cells | Normalized Pct Red Cells |       |       |              |                        |                            |            |                      |                          |        |        |      |        |        |      |        |      |        |      |        |        |      |       |       |        |      |        |        |      |        |
|                                  |                                  | 0.1 uM                                                                                                                                                                                                                                                                                                                                                                                                                                                                                                                                                                                                                                                                              | 85.15                      | 0.83                   | 131.22                     | 72.90                    | 0.03                 | -50.66                   |       |       |              |                        |                            |            |                      |                          |        |        |      |        |        |      |        |      |        |      |        |        |      |       |       |        |      |        |        |      |        |
| 1 uM                             | 101.70                           | 0.87                                                                                                                                                                                                                                                                                                                                                                                                                                                                                                                                                                                                                                                                                | 106.59                     | 111.77                 | 0.17                       | 17.20                    |                      |                          |       |       |              |                        |                            |            |                      |                          |        |        |      |        |        |      |        |      |        |      |        |        |      |       |       |        |      |        |        |      |        |
| 10 uM                            | 95.72                            | 0.85                                                                                                                                                                                                                                                                                                                                                                                                                                                                                                                                                                                                                                                                                | 117.45                     | 75.24                  | 0.02                       | -53.67                   |                      |                          |       |       |              |                        |                            |            |                      |                          |        |        |      |        |        |      |        |      |        |      |        |        |      |       |       |        |      |        |        |      |        |
| Compound                         | Normalized Values (A and B Sets) | Responses                                                                                                                                                                                                                                                                                                                                                                                                                                                                                                                                                                                                                                                                           |                            |                        |                            |                          |                      |                          |       |       |              |                        |                            |            |                      |                          |        |        |      |        |        |      |        |      |        |      |        |        |      |       |       |        |      |        |        |      |        |
| <b>Divalproex Sodium</b>         |                                  | <table border="1"> <thead> <tr> <th colspan="7">Average Response</th> </tr> <tr> <th>Dose</th> <th>Green Signal</th> <th>Actual Pct Green Cells</th> <th>Normalized Pct Green Cells</th> <th>Red Signal</th> <th>Actual Pct Red Cells</th> <th>Normalized Pct Red Cells</th> </tr> </thead> <tbody> <tr> <td>0.1 uM</td> <td>102.96</td> <td>0.90</td> <td>112.08</td> <td>117.09</td> <td>0.18</td> <td>38.10</td> </tr> <tr> <td>1 uM</td> <td>104.69</td> <td>0.92</td> <td>158.83</td> <td>113.76</td> <td>0.24</td> <td>93.14</td> </tr> <tr> <td>10 uM</td> <td>88.51</td> <td>0.85</td> <td>36.36</td> <td>97.06</td> <td>0.11</td> <td>-1.06</td> </tr> </tbody> </table>   | Average Response           |                        |                            |                          |                      |                          |       | Dose  | Green Signal | Actual Pct Green Cells | Normalized Pct Green Cells | Red Signal | Actual Pct Red Cells | Normalized Pct Red Cells | 0.1 uM | 102.96 | 0.90 | 112.08 | 117.09 | 0.18 | 38.10  | 1 uM | 104.69 | 0.92 | 158.83 | 113.76 | 0.24 | 93.14 | 10 uM | 88.51  | 0.85 | 36.36  | 97.06  | 0.11 | -1.06  |
|                                  |                                  | Average Response                                                                                                                                                                                                                                                                                                                                                                                                                                                                                                                                                                                                                                                                    |                            |                        |                            |                          |                      |                          |       |       |              |                        |                            |            |                      |                          |        |        |      |        |        |      |        |      |        |      |        |        |      |       |       |        |      |        |        |      |        |
|                                  |                                  | Dose                                                                                                                                                                                                                                                                                                                                                                                                                                                                                                                                                                                                                                                                                | Green Signal               | Actual Pct Green Cells | Normalized Pct Green Cells | Red Signal               | Actual Pct Red Cells | Normalized Pct Red Cells |       |       |              |                        |                            |            |                      |                          |        |        |      |        |        |      |        |      |        |      |        |        |      |       |       |        |      |        |        |      |        |
|                                  |                                  | 0.1 uM                                                                                                                                                                                                                                                                                                                                                                                                                                                                                                                                                                                                                                                                              | 102.96                     | 0.90                   | 112.08                     | 117.09                   | 0.18                 | 38.10                    |       |       |              |                        |                            |            |                      |                          |        |        |      |        |        |      |        |      |        |      |        |        |      |       |       |        |      |        |        |      |        |
| 1 uM                             | 104.69                           | 0.92                                                                                                                                                                                                                                                                                                                                                                                                                                                                                                                                                                                                                                                                                | 158.83                     | 113.76                 | 0.24                       | 93.14                    |                      |                          |       |       |              |                        |                            |            |                      |                          |        |        |      |        |        |      |        |      |        |      |        |        |      |       |       |        |      |        |        |      |        |
| 10 uM                            | 88.51                            | 0.85                                                                                                                                                                                                                                                                                                                                                                                                                                                                                                                                                                                                                                                                                | 36.36                      | 97.06                  | 0.11                       | -1.06                    |                      |                          |       |       |              |                        |                            |            |                      |                          |        |        |      |        |        |      |        |      |        |      |        |        |      |       |       |        |      |        |        |      |        |
| Compound                         | Normalized Values (A and B Sets) | Responses                                                                                                                                                                                                                                                                                                                                                                                                                                                                                                                                                                                                                                                                           |                            |                        |                            |                          |                      |                          |       |       |              |                        |                            |            |                      |                          |        |        |      |        |        |      |        |      |        |      |        |        |      |       |       |        |      |        |        |      |        |
| <b>DMXAA (Vadimezan)</b>         |                                  | <table border="1"> <thead> <tr> <th colspan="7">Average Response</th> </tr> <tr> <th>Dose</th> <th>Green Signal</th> <th>Actual Pct Green Cells</th> <th>Normalized Pct Green Cells</th> <th>Red Signal</th> <th>Actual Pct Red Cells</th> <th>Normalized Pct Red Cells</th> </tr> </thead> <tbody> <tr> <td>0.1 uM</td> <td>101.66</td> <td>0.87</td> <td>62.15</td> <td>92.99</td> <td>0.06</td> <td>-39.35</td> </tr> <tr> <td>1 uM</td> <td>115.67</td> <td>0.94</td> <td>146.28</td> <td>116.47</td> <td>0.14</td> <td>8.71</td> </tr> <tr> <td>10 uM</td> <td>101.05</td> <td>0.88</td> <td>102.96</td> <td>105.93</td> <td>0.07</td> <td>-23.84</td> </tr> </tbody> </table> | Average Response           |                        |                            |                          |                      |                          |       | Dose  | Green Signal | Actual Pct Green Cells | Normalized Pct Green Cells | Red Signal | Actual Pct Red Cells | Normalized Pct Red Cells | 0.1 uM | 101.66 | 0.87 | 62.15  | 92.99  | 0.06 | -39.35 | 1 uM | 115.67 | 0.94 | 146.28 | 116.47 | 0.14 | 8.71  | 10 uM | 101.05 | 0.88 | 102.96 | 105.93 | 0.07 | -23.84 |
|                                  |                                  | Average Response                                                                                                                                                                                                                                                                                                                                                                                                                                                                                                                                                                                                                                                                    |                            |                        |                            |                          |                      |                          |       |       |              |                        |                            |            |                      |                          |        |        |      |        |        |      |        |      |        |      |        |        |      |       |       |        |      |        |        |      |        |
|                                  |                                  | Dose                                                                                                                                                                                                                                                                                                                                                                                                                                                                                                                                                                                                                                                                                | Green Signal               | Actual Pct Green Cells | Normalized Pct Green Cells | Red Signal               | Actual Pct Red Cells | Normalized Pct Red Cells |       |       |              |                        |                            |            |                      |                          |        |        |      |        |        |      |        |      |        |      |        |        |      |       |       |        |      |        |        |      |        |
|                                  |                                  | 0.1 uM                                                                                                                                                                                                                                                                                                                                                                                                                                                                                                                                                                                                                                                                              | 101.66                     | 0.87                   | 62.15                      | 92.99                    | 0.06                 | -39.35                   |       |       |              |                        |                            |            |                      |                          |        |        |      |        |        |      |        |      |        |      |        |        |      |       |       |        |      |        |        |      |        |
| 1 uM                             | 115.67                           | 0.94                                                                                                                                                                                                                                                                                                                                                                                                                                                                                                                                                                                                                                                                                | 146.28                     | 116.47                 | 0.14                       | 8.71                     |                      |                          |       |       |              |                        |                            |            |                      |                          |        |        |      |        |        |      |        |      |        |      |        |        |      |       |       |        |      |        |        |      |        |
| 10 uM                            | 101.05                           | 0.88                                                                                                                                                                                                                                                                                                                                                                                                                                                                                                                                                                                                                                                                                | 102.96                     | 105.93                 | 0.07                       | -23.84                   |                      |                          |       |       |              |                        |                            |            |                      |                          |        |        |      |        |        |      |        |      |        |      |        |        |      |       |       |        |      |        |        |      |        |
| Compound                         | Normalized Values (A and B Sets) | Responses                                                                                                                                                                                                                                                                                                                                                                                                                                                                                                                                                                                                                                                                           |                            |                        |                            |                          |                      |                          |       |       |              |                        |                            |            |                      |                          |        |        |      |        |        |      |        |      |        |      |        |        |      |       |       |        |      |        |        |      |        |
| <b>Docetaxel</b>                 |                                  | <table border="1"> <thead> <tr> <th colspan="7">Average Response</th> </tr> <tr> <th>Dose</th> <th>Green Signal</th> <th>Actual Pct Green Cells</th> <th>Normalized Pct Green Cells</th> <th>Red Signal</th> <th>Actual Pct Red Cells</th> <th>Normalized Pct Red Cells</th> </tr> </thead> <tbody> <tr> <td>0.1 uM</td> <td>94.77</td> <td>0.72</td> <td>-46.52</td> <td>115.02</td> <td>0.18</td> <td>23.31</td> </tr> <tr> <td>1 uM</td> <td>94.78</td> <td>0.70</td> <td>158.81</td> <td>117.09</td> <td>0.19</td> <td>29.15</td> </tr> <tr> <td>10 uM</td> <td>103.00</td> <td>0.75</td> <td>20.87</td> <td>111.95</td> <td>0.16</td> <td>21.10</td> </tr> </tbody> </table>   | Average Response           |                        |                            |                          |                      |                          |       | Dose  | Green Signal | Actual Pct Green Cells | Normalized Pct Green Cells | Red Signal | Actual Pct Red Cells | Normalized Pct Red Cells | 0.1 uM | 94.77  | 0.72 | -46.52 | 115.02 | 0.18 | 23.31  | 1 uM | 94.78  | 0.70 | 158.81 | 117.09 | 0.19 | 29.15 | 10 uM | 103.00 | 0.75 | 20.87  | 111.95 | 0.16 | 21.10  |
|                                  |                                  | Average Response                                                                                                                                                                                                                                                                                                                                                                                                                                                                                                                                                                                                                                                                    |                            |                        |                            |                          |                      |                          |       |       |              |                        |                            |            |                      |                          |        |        |      |        |        |      |        |      |        |      |        |        |      |       |       |        |      |        |        |      |        |
|                                  |                                  | Dose                                                                                                                                                                                                                                                                                                                                                                                                                                                                                                                                                                                                                                                                                | Green Signal               | Actual Pct Green Cells | Normalized Pct Green Cells | Red Signal               | Actual Pct Red Cells | Normalized Pct Red Cells |       |       |              |                        |                            |            |                      |                          |        |        |      |        |        |      |        |      |        |      |        |        |      |       |       |        |      |        |        |      |        |
|                                  |                                  | 0.1 uM                                                                                                                                                                                                                                                                                                                                                                                                                                                                                                                                                                                                                                                                              | 94.77                      | 0.72                   | -46.52                     | 115.02                   | 0.18                 | 23.31                    |       |       |              |                        |                            |            |                      |                          |        |        |      |        |        |      |        |      |        |      |        |        |      |       |       |        |      |        |        |      |        |
| 1 uM                             | 94.78                            | 0.70                                                                                                                                                                                                                                                                                                                                                                                                                                                                                                                                                                                                                                                                                | 158.81                     | 117.09                 | 0.19                       | 29.15                    |                      |                          |       |       |              |                        |                            |            |                      |                          |        |        |      |        |        |      |        |      |        |      |        |        |      |       |       |        |      |        |        |      |        |
| 10 uM                            | 103.00                           | 0.75                                                                                                                                                                                                                                                                                                                                                                                                                                                                                                                                                                                                                                                                                | 20.87                      | 111.95                 | 0.16                       | 21.10                    |                      |                          |       |       |              |                        |                            |            |                      |                          |        |        |      |        |        |      |        |      |        |      |        |        |      |       |       |        |      |        |        |      |        |
| Compound                         | Normalized Values (A and B Sets) | Responses                                                                                                                                                                                                                                                                                                                                                                                                                                                                                                                                                                                                                                                                           |                            |                        |                            |                          |                      |                          |       |       |              |                        |                            |            |                      |                          |        |        |      |        |        |      |        |      |        |      |        |        |      |       |       |        |      |        |        |      |        |
| <b>Dolutegravir (GSK1349572)</b> |                                  | <table border="1"> <thead> <tr> <th colspan="7">Average Response</th> </tr> <tr> <th>Dose</th> <th>Green Signal</th> <th>Actual Pct Green Cells</th> <th>Normalized Pct Green Cells</th> <th>Red Signal</th> <th>Actual Pct Red Cells</th> <th>Normalized Pct Red Cells</th> </tr> </thead> <tbody> <tr> <td></td> <td></td> <td></td> <td></td> <td></td> <td></td> <td></td> </tr> </tbody> </table>                                                                                                                                                                                                                                                                              | Average Response           |                        |                            |                          |                      |                          |       | Dose  | Green Signal | Actual Pct Green Cells | Normalized Pct Green Cells | Red Signal | Actual Pct Red Cells | Normalized Pct Red Cells |        |        |      |        |        |      |        |      |        |      |        |        |      |       |       |        |      |        |        |      |        |
|                                  |                                  | Average Response                                                                                                                                                                                                                                                                                                                                                                                                                                                                                                                                                                                                                                                                    |                            |                        |                            |                          |                      |                          |       |       |              |                        |                            |            |                      |                          |        |        |      |        |        |      |        |      |        |      |        |        |      |       |       |        |      |        |        |      |        |
| Dose                             | Green Signal                     | Actual Pct Green Cells                                                                                                                                                                                                                                                                                                                                                                                                                                                                                                                                                                                                                                                              | Normalized Pct Green Cells | Red Signal             | Actual Pct Red Cells       | Normalized Pct Red Cells |                      |                          |       |       |              |                        |                            |            |                      |                          |        |        |      |        |        |      |        |      |        |      |        |        |      |       |       |        |      |        |        |      |        |
|                                  |                                  |                                                                                                                                                                                                                                                                                                                                                                                                                                                                                                                                                                                                                                                                                     |                            |                        |                            |                          |                      |                          |       |       |              |                        |                            |            |                      |                          |        |        |      |        |        |      |        |      |        |      |        |        |      |       |       |        |      |        |        |      |        |



Compound

Normalized Values (A and B Sets)

Responses

|       |        |        |                        |                            | <table border="1"> <thead> <tr> <th></th> <th></th> <th>Actual Pct Green Cells</th> <th>Normalized Pct Green Cells</th> <th></th> <th></th> <th>Normalized Pct Red Cells</th> </tr> </thead> <tbody> <tr> <td>0.1 uM</td> <td>95.54</td> <td>0.88</td> <td>81.62</td> <td>111.17</td> <td>0.15</td> <td>13.32</td> </tr> <tr> <td>1 uM</td> <td>100.57</td> <td>0.83</td> <td>66.89</td> <td>98.69</td> <td>0.11</td> <td>-6.59</td> </tr> <tr> <td>10 uM</td> <td>102.90</td> <td>0.92</td> <td>200.36</td> <td>76.54</td> <td>0.02</td> <td>-46.46</td> </tr> </tbody> </table> |        |                          |  |  |  |  |  | Actual Pct Green Cells | Normalized Pct Green Cells |  |  | Normalized Pct Red Cells | 0.1 uM | 95.54 | 0.88 | 81.62 | 111.17 | 0.15 | 13.32 | 1 uM | 100.57 | 0.83 | 66.89 | 98.69 | 0.11 | -6.59 | 10 uM | 102.90 | 0.92 | 200.36 | 76.54 | 0.02 | -46.46 |
|-------|--------|--------|------------------------|----------------------------|-----------------------------------------------------------------------------------------------------------------------------------------------------------------------------------------------------------------------------------------------------------------------------------------------------------------------------------------------------------------------------------------------------------------------------------------------------------------------------------------------------------------------------------------------------------------------------------|--------|--------------------------|--|--|--|--|--|------------------------|----------------------------|--|--|--------------------------|--------|-------|------|-------|--------|------|-------|------|--------|------|-------|-------|------|-------|-------|--------|------|--------|-------|------|--------|
|       |        |        | Actual Pct Green Cells | Normalized Pct Green Cells |                                                                                                                                                                                                                                                                                                                                                                                                                                                                                                                                                                                   |        | Normalized Pct Red Cells |  |  |  |  |  |                        |                            |  |  |                          |        |       |      |       |        |      |       |      |        |      |       |       |      |       |       |        |      |        |       |      |        |
|       | 0.1 uM | 95.54  | 0.88                   | 81.62                      | 111.17                                                                                                                                                                                                                                                                                                                                                                                                                                                                                                                                                                            | 0.15   | 13.32                    |  |  |  |  |  |                        |                            |  |  |                          |        |       |      |       |        |      |       |      |        |      |       |       |      |       |       |        |      |        |       |      |        |
|       | 1 uM   | 100.57 | 0.83                   | 66.89                      | 98.69                                                                                                                                                                                                                                                                                                                                                                                                                                                                                                                                                                             | 0.11   | -6.59                    |  |  |  |  |  |                        |                            |  |  |                          |        |       |      |       |        |      |       |      |        |      |       |       |      |       |       |        |      |        |       |      |        |
| 10 uM | 102.90 | 0.92   | 200.36                 | 76.54                      | 0.02                                                                                                                                                                                                                                                                                                                                                                                                                                                                                                                                                                              | -46.46 |                          |  |  |  |  |  |                        |                            |  |  |                          |        |       |      |       |        |      |       |      |        |      |       |       |      |       |       |        |      |        |       |      |        |

Compound

Normalized Values (A and B Sets)

Responses

| <b>Domiphen Bromide</b> |                  |              |                        |                            | <table border="1"> <thead> <tr> <th colspan="7">Average Response</th> </tr> <tr> <th>Dose</th> <th>Green Signal</th> <th>Actual Pct Green Cells</th> <th>Normalized Pct Green Cells</th> <th>Red Signal</th> <th>Actual Pct Red Cells</th> <th>Normalized Pct Red Cells</th> </tr> </thead> <tbody> <tr> <td>0.1 uM</td> <td>104.18</td> <td>0.93</td> <td>139.77</td> <td>103.58</td> <td>0.13</td> <td>8.26</td> </tr> <tr> <td>1 uM</td> <td>102.98</td> <td>0.94</td> <td>287.39</td> <td>83.11</td> <td>0.05</td> <td>-16.98</td> </tr> <tr> <td>10 uM</td> <td>111.64</td> <td>0.77</td> <td>-44.07</td> <td>114.61</td> <td>0.24</td> <td>54.34</td> </tr> </tbody> </table> |                      |                          |  |  |  | Average Response |  |  |  |  |  |  | Dose | Green Signal | Actual Pct Green Cells | Normalized Pct Green Cells | Red Signal | Actual Pct Red Cells | Normalized Pct Red Cells | 0.1 uM | 104.18 | 0.93 | 139.77 | 103.58 | 0.13 | 8.26 | 1 uM | 102.98 | 0.94 | 287.39 | 83.11 | 0.05 | -16.98 | 10 uM | 111.64 | 0.77 | -44.07 | 114.61 | 0.24 | 54.34 |
|-------------------------|------------------|--------------|------------------------|----------------------------|-------------------------------------------------------------------------------------------------------------------------------------------------------------------------------------------------------------------------------------------------------------------------------------------------------------------------------------------------------------------------------------------------------------------------------------------------------------------------------------------------------------------------------------------------------------------------------------------------------------------------------------------------------------------------------------|----------------------|--------------------------|--|--|--|------------------|--|--|--|--|--|--|------|--------------|------------------------|----------------------------|------------|----------------------|--------------------------|--------|--------|------|--------|--------|------|------|------|--------|------|--------|-------|------|--------|-------|--------|------|--------|--------|------|-------|
|                         | Average Response |              |                        |                            |                                                                                                                                                                                                                                                                                                                                                                                                                                                                                                                                                                                                                                                                                     |                      |                          |  |  |  |                  |  |  |  |  |  |  |      |              |                        |                            |            |                      |                          |        |        |      |        |        |      |      |      |        |      |        |       |      |        |       |        |      |        |        |      |       |
|                         | Dose             | Green Signal | Actual Pct Green Cells | Normalized Pct Green Cells | Red Signal                                                                                                                                                                                                                                                                                                                                                                                                                                                                                                                                                                                                                                                                          | Actual Pct Red Cells | Normalized Pct Red Cells |  |  |  |                  |  |  |  |  |  |  |      |              |                        |                            |            |                      |                          |        |        |      |        |        |      |      |      |        |      |        |       |      |        |       |        |      |        |        |      |       |
|                         | 0.1 uM           | 104.18       | 0.93                   | 139.77                     | 103.58                                                                                                                                                                                                                                                                                                                                                                                                                                                                                                                                                                                                                                                                              | 0.13                 | 8.26                     |  |  |  |                  |  |  |  |  |  |  |      |              |                        |                            |            |                      |                          |        |        |      |        |        |      |      |      |        |      |        |       |      |        |       |        |      |        |        |      |       |
| 1 uM                    | 102.98           | 0.94         | 287.39                 | 83.11                      | 0.05                                                                                                                                                                                                                                                                                                                                                                                                                                                                                                                                                                                                                                                                                | -16.98               |                          |  |  |  |                  |  |  |  |  |  |  |      |              |                        |                            |            |                      |                          |        |        |      |        |        |      |      |      |        |      |        |       |      |        |       |        |      |        |        |      |       |
| 10 uM                   | 111.64           | 0.77         | -44.07                 | 114.61                     | 0.24                                                                                                                                                                                                                                                                                                                                                                                                                                                                                                                                                                                                                                                                                | 54.34                |                          |  |  |  |                  |  |  |  |  |  |  |      |              |                        |                            |            |                      |                          |        |        |      |        |        |      |      |      |        |      |        |       |      |        |       |        |      |        |        |      |       |

Compound

Normalized Values (A and B Sets)

Responses

| <b>Doripenem Hydrate</b> |                  |              |                        |                            | <table border="1"> <thead> <tr> <th colspan="7">Average Response</th> </tr> <tr> <th>Dose</th> <th>Green Signal</th> <th>Actual Pct Green Cells</th> <th>Normalized Pct Green Cells</th> <th>Red Signal</th> <th>Actual Pct Red Cells</th> <th>Normalized Pct Red Cells</th> </tr> </thead> <tbody> <tr> <td>0.1 uM</td> <td>91.52</td> <td>0.80</td> <td>-26.19</td> <td>96.14</td> <td>0.06</td> <td>-41.23</td> </tr> <tr> <td>1 uM</td> <td>93.88</td> <td>0.84</td> <td>31.70</td> <td>88.40</td> <td>0.05</td> <td>-35.04</td> </tr> <tr> <td>10 uM</td> <td>90.96</td> <td>0.78</td> <td>39.71</td> <td>112.14</td> <td>0.09</td> <td>-9.54</td> </tr> </tbody> </table> |                      |                          |  |  |  | Average Response |  |  |  |  |  |  | Dose | Green Signal | Actual Pct Green Cells | Normalized Pct Green Cells | Red Signal | Actual Pct Red Cells | Normalized Pct Red Cells | 0.1 uM | 91.52 | 0.80 | -26.19 | 96.14 | 0.06 | -41.23 | 1 uM | 93.88 | 0.84 | 31.70 | 88.40 | 0.05 | -35.04 | 10 uM | 90.96 | 0.78 | 39.71 | 112.14 | 0.09 | -9.54 |
|--------------------------|------------------|--------------|------------------------|----------------------------|---------------------------------------------------------------------------------------------------------------------------------------------------------------------------------------------------------------------------------------------------------------------------------------------------------------------------------------------------------------------------------------------------------------------------------------------------------------------------------------------------------------------------------------------------------------------------------------------------------------------------------------------------------------------------------|----------------------|--------------------------|--|--|--|------------------|--|--|--|--|--|--|------|--------------|------------------------|----------------------------|------------|----------------------|--------------------------|--------|-------|------|--------|-------|------|--------|------|-------|------|-------|-------|------|--------|-------|-------|------|-------|--------|------|-------|
|                          | Average Response |              |                        |                            |                                                                                                                                                                                                                                                                                                                                                                                                                                                                                                                                                                                                                                                                                 |                      |                          |  |  |  |                  |  |  |  |  |  |  |      |              |                        |                            |            |                      |                          |        |       |      |        |       |      |        |      |       |      |       |       |      |        |       |       |      |       |        |      |       |
|                          | Dose             | Green Signal | Actual Pct Green Cells | Normalized Pct Green Cells | Red Signal                                                                                                                                                                                                                                                                                                                                                                                                                                                                                                                                                                                                                                                                      | Actual Pct Red Cells | Normalized Pct Red Cells |  |  |  |                  |  |  |  |  |  |  |      |              |                        |                            |            |                      |                          |        |       |      |        |       |      |        |      |       |      |       |       |      |        |       |       |      |       |        |      |       |
|                          | 0.1 uM           | 91.52        | 0.80                   | -26.19                     | 96.14                                                                                                                                                                                                                                                                                                                                                                                                                                                                                                                                                                                                                                                                           | 0.06                 | -41.23                   |  |  |  |                  |  |  |  |  |  |  |      |              |                        |                            |            |                      |                          |        |       |      |        |       |      |        |      |       |      |       |       |      |        |       |       |      |       |        |      |       |
| 1 uM                     | 93.88            | 0.84         | 31.70                  | 88.40                      | 0.05                                                                                                                                                                                                                                                                                                                                                                                                                                                                                                                                                                                                                                                                            | -35.04               |                          |  |  |  |                  |  |  |  |  |  |  |      |              |                        |                            |            |                      |                          |        |       |      |        |       |      |        |      |       |      |       |       |      |        |       |       |      |       |        |      |       |
| 10 uM                    | 90.96            | 0.78         | 39.71                  | 112.14                     | 0.09                                                                                                                                                                                                                                                                                                                                                                                                                                                                                                                                                                                                                                                                            | -9.54                |                          |  |  |  |                  |  |  |  |  |  |  |      |              |                        |                            |            |                      |                          |        |       |      |        |       |      |        |      |       |      |       |       |      |        |       |       |      |       |        |      |       |

Compound

Normalized Values (A and B Sets)

Responses

| <b>Dovitinib (TKI-258) Dilactic Acid</b> |                  |              |                        |                            | <table border="1"> <thead> <tr> <th colspan="7">Average Response</th> </tr> <tr> <th>Dose</th> <th>Green Signal</th> <th>Actual Pct Green Cells</th> <th>Normalized Pct Green Cells</th> <th>Red Signal</th> <th>Actual Pct Red Cells</th> <th>Normalized Pct Red Cells</th> </tr> </thead> <tbody> <tr> <td>0.1 uM</td> <td>87.25</td> <td>0.79</td> <td>-8.09</td> <td>74.45</td> <td>0.03</td> <td>-41.64</td> </tr> <tr> <td>1 uM</td> <td>103.08</td> <td>0.89</td> <td>91.59</td> <td>89.29</td> <td>0.08</td> <td>-22.00</td> </tr> <tr> <td>10 uM</td> <td>125.34</td> <td>0.99</td> <td>542.67</td> <td>174.26</td> <td>0.45</td> <td>157.08</td> </tr> </tbody> </table> |                      |                          |  |  |  | Average Response |  |  |  |  |  |  | Dose | Green Signal | Actual Pct Green Cells | Normalized Pct Green Cells | Red Signal | Actual Pct Red Cells | Normalized Pct Red Cells | 0.1 uM | 87.25 | 0.79 | -8.09 | 74.45 | 0.03 | -41.64 | 1 uM | 103.08 | 0.89 | 91.59 | 89.29 | 0.08 | -22.00 | 10 uM | 125.34 | 0.99 | 542.67 | 174.26 | 0.45 | 157.08 |
|------------------------------------------|------------------|--------------|------------------------|----------------------------|------------------------------------------------------------------------------------------------------------------------------------------------------------------------------------------------------------------------------------------------------------------------------------------------------------------------------------------------------------------------------------------------------------------------------------------------------------------------------------------------------------------------------------------------------------------------------------------------------------------------------------------------------------------------------------|----------------------|--------------------------|--|--|--|------------------|--|--|--|--|--|--|------|--------------|------------------------|----------------------------|------------|----------------------|--------------------------|--------|-------|------|-------|-------|------|--------|------|--------|------|-------|-------|------|--------|-------|--------|------|--------|--------|------|--------|
|                                          | Average Response |              |                        |                            |                                                                                                                                                                                                                                                                                                                                                                                                                                                                                                                                                                                                                                                                                    |                      |                          |  |  |  |                  |  |  |  |  |  |  |      |              |                        |                            |            |                      |                          |        |       |      |       |       |      |        |      |        |      |       |       |      |        |       |        |      |        |        |      |        |
|                                          | Dose             | Green Signal | Actual Pct Green Cells | Normalized Pct Green Cells | Red Signal                                                                                                                                                                                                                                                                                                                                                                                                                                                                                                                                                                                                                                                                         | Actual Pct Red Cells | Normalized Pct Red Cells |  |  |  |                  |  |  |  |  |  |  |      |              |                        |                            |            |                      |                          |        |       |      |       |       |      |        |      |        |      |       |       |      |        |       |        |      |        |        |      |        |
|                                          | 0.1 uM           | 87.25        | 0.79                   | -8.09                      | 74.45                                                                                                                                                                                                                                                                                                                                                                                                                                                                                                                                                                                                                                                                              | 0.03                 | -41.64                   |  |  |  |                  |  |  |  |  |  |  |      |              |                        |                            |            |                      |                          |        |       |      |       |       |      |        |      |        |      |       |       |      |        |       |        |      |        |        |      |        |
| 1 uM                                     | 103.08           | 0.89         | 91.59                  | 89.29                      | 0.08                                                                                                                                                                                                                                                                                                                                                                                                                                                                                                                                                                                                                                                                               | -22.00               |                          |  |  |  |                  |  |  |  |  |  |  |      |              |                        |                            |            |                      |                          |        |       |      |       |       |      |        |      |        |      |       |       |      |        |       |        |      |        |        |      |        |
| 10 uM                                    | 125.34           | 0.99         | 542.67                 | 174.26                     | 0.45                                                                                                                                                                                                                                                                                                                                                                                                                                                                                                                                                                                                                                                                               | 157.08               |                          |  |  |  |                  |  |  |  |  |  |  |      |              |                        |                            |            |                      |                          |        |       |      |       |       |      |        |      |        |      |       |       |      |        |       |        |      |        |        |      |        |

Compound

Normalized Values (A and B Sets)

Responses

| <b>Dovitinib (TKI-258, CHIR-258)</b> |                  |              |                        |                            | <table border="1"> <thead> <tr> <th colspan="7">Average Response</th> </tr> <tr> <th>Dose</th> <th>Green Signal</th> <th>Actual Pct Green Cells</th> <th>Normalized Pct Green Cells</th> <th>Red Signal</th> <th>Actual Pct Red Cells</th> <th>Normalized Pct Red Cells</th> </tr> </thead> <tbody> <tr> <td>0.1 uM</td> <td>85.41</td> <td>0.82</td> <td>41.39</td> <td>74.73</td> <td>0.02</td> <td>-65.84</td> </tr> <tr> <td>1 uM</td> <td>89.68</td> <td>0.86</td> <td>30.08</td> <td>66.44</td> <td>0.02</td> <td>-37.48</td> </tr> <tr> <td>10 uM</td> <td>100.64</td> <td>0.94</td> <td>120.94</td> <td>113.85</td> <td>0.21</td> <td>46.71</td> </tr> </tbody> </table> |                      |                          |  |  |  | Average Response |  |  |  |  |  |  | Dose | Green Signal | Actual Pct Green Cells | Normalized Pct Green Cells | Red Signal | Actual Pct Red Cells | Normalized Pct Red Cells | 0.1 uM | 85.41 | 0.82 | 41.39 | 74.73 | 0.02 | -65.84 | 1 uM | 89.68 | 0.86 | 30.08 | 66.44 | 0.02 | -37.48 | 10 uM | 100.64 | 0.94 | 120.94 | 113.85 | 0.21 | 46.71 |
|--------------------------------------|------------------|--------------|------------------------|----------------------------|----------------------------------------------------------------------------------------------------------------------------------------------------------------------------------------------------------------------------------------------------------------------------------------------------------------------------------------------------------------------------------------------------------------------------------------------------------------------------------------------------------------------------------------------------------------------------------------------------------------------------------------------------------------------------------|----------------------|--------------------------|--|--|--|------------------|--|--|--|--|--|--|------|--------------|------------------------|----------------------------|------------|----------------------|--------------------------|--------|-------|------|-------|-------|------|--------|------|-------|------|-------|-------|------|--------|-------|--------|------|--------|--------|------|-------|
|                                      | Average Response |              |                        |                            |                                                                                                                                                                                                                                                                                                                                                                                                                                                                                                                                                                                                                                                                                  |                      |                          |  |  |  |                  |  |  |  |  |  |  |      |              |                        |                            |            |                      |                          |        |       |      |       |       |      |        |      |       |      |       |       |      |        |       |        |      |        |        |      |       |
|                                      | Dose             | Green Signal | Actual Pct Green Cells | Normalized Pct Green Cells | Red Signal                                                                                                                                                                                                                                                                                                                                                                                                                                                                                                                                                                                                                                                                       | Actual Pct Red Cells | Normalized Pct Red Cells |  |  |  |                  |  |  |  |  |  |  |      |              |                        |                            |            |                      |                          |        |       |      |       |       |      |        |      |       |      |       |       |      |        |       |        |      |        |        |      |       |
|                                      | 0.1 uM           | 85.41        | 0.82                   | 41.39                      | 74.73                                                                                                                                                                                                                                                                                                                                                                                                                                                                                                                                                                                                                                                                            | 0.02                 | -65.84                   |  |  |  |                  |  |  |  |  |  |  |      |              |                        |                            |            |                      |                          |        |       |      |       |       |      |        |      |       |      |       |       |      |        |       |        |      |        |        |      |       |
| 1 uM                                 | 89.68            | 0.86         | 30.08                  | 66.44                      | 0.02                                                                                                                                                                                                                                                                                                                                                                                                                                                                                                                                                                                                                                                                             | -37.48               |                          |  |  |  |                  |  |  |  |  |  |  |      |              |                        |                            |            |                      |                          |        |       |      |       |       |      |        |      |       |      |       |       |      |        |       |        |      |        |        |      |       |
| 10 uM                                | 100.64           | 0.94         | 120.94                 | 113.85                     | 0.21                                                                                                                                                                                                                                                                                                                                                                                                                                                                                                                                                                                                                                                                             | 46.71                |                          |  |  |  |                  |  |  |  |  |  |  |      |              |                        |                            |            |                      |                          |        |       |      |       |       |      |        |      |       |      |       |       |      |        |       |        |      |        |        |      |       |

| Compound            | Normalized Values (A and B Sets) | Responses                                                                                                                                                                                                                                                                                                                                                                                                                                                                                                                                                                                                                                                                        |                  |                        |                            |            |                      |                          |  |      |              |                        |                            |            |                      |                          |        |       |      |        |       |      |        |      |       |      |       |       |      |        |       |       |      |        |       |      |        |
|---------------------|----------------------------------|----------------------------------------------------------------------------------------------------------------------------------------------------------------------------------------------------------------------------------------------------------------------------------------------------------------------------------------------------------------------------------------------------------------------------------------------------------------------------------------------------------------------------------------------------------------------------------------------------------------------------------------------------------------------------------|------------------|------------------------|----------------------------|------------|----------------------|--------------------------|--|------|--------------|------------------------|----------------------------|------------|----------------------|--------------------------|--------|-------|------|--------|-------|------|--------|------|-------|------|-------|-------|------|--------|-------|-------|------|--------|-------|------|--------|
| <b>Doxapram HCl</b> |                                  | <table border="1"> <thead> <tr> <th colspan="7">Average Response</th> </tr> <tr> <th>Dose</th> <th>Green Signal</th> <th>Actual Pct Green Cells</th> <th>Normalized Pct Green Cells</th> <th>Red Signal</th> <th>Actual Pct Red Cells</th> <th>Normalized Pct Red Cells</th> </tr> </thead> <tbody> <tr> <td>0.1 uM</td> <td>81.25</td> <td>0.80</td> <td>138.26</td> <td>69.87</td> <td>0.02</td> <td>-52.74</td> </tr> <tr> <td>1 uM</td> <td>93.15</td> <td>0.79</td> <td>50.48</td> <td>77.10</td> <td>0.04</td> <td>-46.39</td> </tr> <tr> <td>10 uM</td> <td>84.57</td> <td>0.72</td> <td>-77.85</td> <td>86.18</td> <td>0.04</td> <td>-41.72</td> </tr> </tbody> </table> | Average Response |                        |                            |            |                      |                          |  | Dose | Green Signal | Actual Pct Green Cells | Normalized Pct Green Cells | Red Signal | Actual Pct Red Cells | Normalized Pct Red Cells | 0.1 uM | 81.25 | 0.80 | 138.26 | 69.87 | 0.02 | -52.74 | 1 uM | 93.15 | 0.79 | 50.48 | 77.10 | 0.04 | -46.39 | 10 uM | 84.57 | 0.72 | -77.85 | 86.18 | 0.04 | -41.72 |
|                     |                                  | Average Response                                                                                                                                                                                                                                                                                                                                                                                                                                                                                                                                                                                                                                                                 |                  |                        |                            |            |                      |                          |  |      |              |                        |                            |            |                      |                          |        |       |      |        |       |      |        |      |       |      |       |       |      |        |       |       |      |        |       |      |        |
|                     |                                  | Dose                                                                                                                                                                                                                                                                                                                                                                                                                                                                                                                                                                                                                                                                             | Green Signal     | Actual Pct Green Cells | Normalized Pct Green Cells | Red Signal | Actual Pct Red Cells | Normalized Pct Red Cells |  |      |              |                        |                            |            |                      |                          |        |       |      |        |       |      |        |      |       |      |       |       |      |        |       |       |      |        |       |      |        |
|                     |                                  | 0.1 uM                                                                                                                                                                                                                                                                                                                                                                                                                                                                                                                                                                                                                                                                           | 81.25            | 0.80                   | 138.26                     | 69.87      | 0.02                 | -52.74                   |  |      |              |                        |                            |            |                      |                          |        |       |      |        |       |      |        |      |       |      |       |       |      |        |       |       |      |        |       |      |        |
| 1 uM                | 93.15                            | 0.79                                                                                                                                                                                                                                                                                                                                                                                                                                                                                                                                                                                                                                                                             | 50.48            | 77.10                  | 0.04                       | -46.39     |                      |                          |  |      |              |                        |                            |            |                      |                          |        |       |      |        |       |      |        |      |       |      |       |       |      |        |       |       |      |        |       |      |        |
| 10 uM               | 84.57                            | 0.72                                                                                                                                                                                                                                                                                                                                                                                                                                                                                                                                                                                                                                                                             | -77.85           | 86.18                  | 0.04                       | -41.72     |                      |                          |  |      |              |                        |                            |            |                      |                          |        |       |      |        |       |      |        |      |       |      |       |       |      |        |       |       |      |        |       |      |        |

| Compound               | Normalized Values (A and B Sets) | Responses                                                                                                                                                                                                                                                                                                                                                                                                                                                                                                                                                                                                                                                                       |                  |                        |                            |            |                      |                          |  |      |              |                        |                            |            |                      |                          |        |       |      |       |       |      |        |      |       |      |        |       |      |       |       |        |      |       |       |      |        |
|------------------------|----------------------------------|---------------------------------------------------------------------------------------------------------------------------------------------------------------------------------------------------------------------------------------------------------------------------------------------------------------------------------------------------------------------------------------------------------------------------------------------------------------------------------------------------------------------------------------------------------------------------------------------------------------------------------------------------------------------------------|------------------|------------------------|----------------------------|------------|----------------------|--------------------------|--|------|--------------|------------------------|----------------------------|------------|----------------------|--------------------------|--------|-------|------|-------|-------|------|--------|------|-------|------|--------|-------|------|-------|-------|--------|------|-------|-------|------|--------|
| <b>Doxercalciferol</b> |                                  | <table border="1"> <thead> <tr> <th colspan="7">Average Response</th> </tr> <tr> <th>Dose</th> <th>Green Signal</th> <th>Actual Pct Green Cells</th> <th>Normalized Pct Green Cells</th> <th>Red Signal</th> <th>Actual Pct Red Cells</th> <th>Normalized Pct Red Cells</th> </tr> </thead> <tbody> <tr> <td>0.1 uM</td> <td>91.34</td> <td>0.86</td> <td>75.29</td> <td>69.40</td> <td>0.01</td> <td>-67.19</td> </tr> <tr> <td>1 uM</td> <td>87.85</td> <td>0.77</td> <td>-29.20</td> <td>92.82</td> <td>0.09</td> <td>-1.59</td> </tr> <tr> <td>10 uM</td> <td>102.18</td> <td>0.90</td> <td>87.36</td> <td>71.34</td> <td>0.04</td> <td>-34.62</td> </tr> </tbody> </table> | Average Response |                        |                            |            |                      |                          |  | Dose | Green Signal | Actual Pct Green Cells | Normalized Pct Green Cells | Red Signal | Actual Pct Red Cells | Normalized Pct Red Cells | 0.1 uM | 91.34 | 0.86 | 75.29 | 69.40 | 0.01 | -67.19 | 1 uM | 87.85 | 0.77 | -29.20 | 92.82 | 0.09 | -1.59 | 10 uM | 102.18 | 0.90 | 87.36 | 71.34 | 0.04 | -34.62 |
|                        |                                  | Average Response                                                                                                                                                                                                                                                                                                                                                                                                                                                                                                                                                                                                                                                                |                  |                        |                            |            |                      |                          |  |      |              |                        |                            |            |                      |                          |        |       |      |       |       |      |        |      |       |      |        |       |      |       |       |        |      |       |       |      |        |
|                        |                                  | Dose                                                                                                                                                                                                                                                                                                                                                                                                                                                                                                                                                                                                                                                                            | Green Signal     | Actual Pct Green Cells | Normalized Pct Green Cells | Red Signal | Actual Pct Red Cells | Normalized Pct Red Cells |  |      |              |                        |                            |            |                      |                          |        |       |      |       |       |      |        |      |       |      |        |       |      |       |       |        |      |       |       |      |        |
|                        |                                  | 0.1 uM                                                                                                                                                                                                                                                                                                                                                                                                                                                                                                                                                                                                                                                                          | 91.34            | 0.86                   | 75.29                      | 69.40      | 0.01                 | -67.19                   |  |      |              |                        |                            |            |                      |                          |        |       |      |       |       |      |        |      |       |      |        |       |      |       |       |        |      |       |       |      |        |
| 1 uM                   | 87.85                            | 0.77                                                                                                                                                                                                                                                                                                                                                                                                                                                                                                                                                                                                                                                                            | -29.20           | 92.82                  | 0.09                       | -1.59      |                      |                          |  |      |              |                        |                            |            |                      |                          |        |       |      |       |       |      |        |      |       |      |        |       |      |       |       |        |      |       |       |      |        |
| 10 uM                  | 102.18                           | 0.90                                                                                                                                                                                                                                                                                                                                                                                                                                                                                                                                                                                                                                                                            | 87.36            | 71.34                  | 0.04                       | -34.62     |                      |                          |  |      |              |                        |                            |            |                      |                          |        |       |      |       |       |      |        |      |       |      |        |       |      |       |       |        |      |       |       |      |        |

| Compound             | Normalized Values (A and B Sets) | Responses                                                                                                                                                                                                                                                                                                                                                                                                                                                                                                                                                                                                                                                                            |                  |                        |                            |            |                      |                          |  |      |              |                        |                            |            |                      |                          |        |        |      |        |       |      |        |      |        |      |        |       |      |        |       |        |      |       |        |      |        |
|----------------------|----------------------------------|--------------------------------------------------------------------------------------------------------------------------------------------------------------------------------------------------------------------------------------------------------------------------------------------------------------------------------------------------------------------------------------------------------------------------------------------------------------------------------------------------------------------------------------------------------------------------------------------------------------------------------------------------------------------------------------|------------------|------------------------|----------------------------|------------|----------------------|--------------------------|--|------|--------------|------------------------|----------------------------|------------|----------------------|--------------------------|--------|--------|------|--------|-------|------|--------|------|--------|------|--------|-------|------|--------|-------|--------|------|-------|--------|------|--------|
| <b>Doxifluridine</b> |                                  | <table border="1"> <thead> <tr> <th colspan="7">Average Response</th> </tr> <tr> <th>Dose</th> <th>Green Signal</th> <th>Actual Pct Green Cells</th> <th>Normalized Pct Green Cells</th> <th>Red Signal</th> <th>Actual Pct Red Cells</th> <th>Normalized Pct Red Cells</th> </tr> </thead> <tbody> <tr> <td>0.1 uM</td> <td>106.32</td> <td>0.92</td> <td>117.44</td> <td>90.08</td> <td>0.07</td> <td>-41.59</td> </tr> <tr> <td>1 uM</td> <td>110.87</td> <td>0.90</td> <td>122.88</td> <td>96.33</td> <td>0.08</td> <td>-22.50</td> </tr> <tr> <td>10 uM</td> <td>107.00</td> <td>0.88</td> <td>92.65</td> <td>112.22</td> <td>0.10</td> <td>-13.16</td> </tr> </tbody> </table> | Average Response |                        |                            |            |                      |                          |  | Dose | Green Signal | Actual Pct Green Cells | Normalized Pct Green Cells | Red Signal | Actual Pct Red Cells | Normalized Pct Red Cells | 0.1 uM | 106.32 | 0.92 | 117.44 | 90.08 | 0.07 | -41.59 | 1 uM | 110.87 | 0.90 | 122.88 | 96.33 | 0.08 | -22.50 | 10 uM | 107.00 | 0.88 | 92.65 | 112.22 | 0.10 | -13.16 |
|                      |                                  | Average Response                                                                                                                                                                                                                                                                                                                                                                                                                                                                                                                                                                                                                                                                     |                  |                        |                            |            |                      |                          |  |      |              |                        |                            |            |                      |                          |        |        |      |        |       |      |        |      |        |      |        |       |      |        |       |        |      |       |        |      |        |
|                      |                                  | Dose                                                                                                                                                                                                                                                                                                                                                                                                                                                                                                                                                                                                                                                                                 | Green Signal     | Actual Pct Green Cells | Normalized Pct Green Cells | Red Signal | Actual Pct Red Cells | Normalized Pct Red Cells |  |      |              |                        |                            |            |                      |                          |        |        |      |        |       |      |        |      |        |      |        |       |      |        |       |        |      |       |        |      |        |
|                      |                                  | 0.1 uM                                                                                                                                                                                                                                                                                                                                                                                                                                                                                                                                                                                                                                                                               | 106.32           | 0.92                   | 117.44                     | 90.08      | 0.07                 | -41.59                   |  |      |              |                        |                            |            |                      |                          |        |        |      |        |       |      |        |      |        |      |        |       |      |        |       |        |      |       |        |      |        |
| 1 uM                 | 110.87                           | 0.90                                                                                                                                                                                                                                                                                                                                                                                                                                                                                                                                                                                                                                                                                 | 122.88           | 96.33                  | 0.08                       | -22.50     |                      |                          |  |      |              |                        |                            |            |                      |                          |        |        |      |        |       |      |        |      |        |      |        |       |      |        |       |        |      |       |        |      |        |
| 10 uM                | 107.00                           | 0.88                                                                                                                                                                                                                                                                                                                                                                                                                                                                                                                                                                                                                                                                                 | 92.65            | 112.22                 | 0.10                       | -13.16     |                      |                          |  |      |              |                        |                            |            |                      |                          |        |        |      |        |       |      |        |      |        |      |        |       |      |        |       |        |      |       |        |      |        |

| Compound                   | Normalized Values (A and B Sets) | Responses                                                                                                                                                                                                                                                                                                                                                                                                                                                                                                                                                                                                                                                                          |                  |                        |                            |            |                      |                          |  |      |              |                        |                            |            |                      |                          |        |       |      |       |        |      |       |      |       |      |        |        |      |        |       |       |      |        |        |      |        |
|----------------------------|----------------------------------|------------------------------------------------------------------------------------------------------------------------------------------------------------------------------------------------------------------------------------------------------------------------------------------------------------------------------------------------------------------------------------------------------------------------------------------------------------------------------------------------------------------------------------------------------------------------------------------------------------------------------------------------------------------------------------|------------------|------------------------|----------------------------|------------|----------------------|--------------------------|--|------|--------------|------------------------|----------------------------|------------|----------------------|--------------------------|--------|-------|------|-------|--------|------|-------|------|-------|------|--------|--------|------|--------|-------|-------|------|--------|--------|------|--------|
| <b>Doxycycline Hyclate</b> |                                  | <table border="1"> <thead> <tr> <th colspan="7">Average Response</th> </tr> <tr> <th>Dose</th> <th>Green Signal</th> <th>Actual Pct Green Cells</th> <th>Normalized Pct Green Cells</th> <th>Red Signal</th> <th>Actual Pct Red Cells</th> <th>Normalized Pct Red Cells</th> </tr> </thead> <tbody> <tr> <td>0.1 uM</td> <td>96.97</td> <td>0.89</td> <td>16.95</td> <td>177.26</td> <td>0.29</td> <td>83.89</td> </tr> <tr> <td>1 uM</td> <td>87.15</td> <td>0.69</td> <td>-14.35</td> <td>183.80</td> <td>0.34</td> <td>107.72</td> </tr> <tr> <td>10 uM</td> <td>69.39</td> <td>0.46</td> <td>496.17</td> <td>172.70</td> <td>0.31</td> <td>100.68</td> </tr> </tbody> </table> | Average Response |                        |                            |            |                      |                          |  | Dose | Green Signal | Actual Pct Green Cells | Normalized Pct Green Cells | Red Signal | Actual Pct Red Cells | Normalized Pct Red Cells | 0.1 uM | 96.97 | 0.89 | 16.95 | 177.26 | 0.29 | 83.89 | 1 uM | 87.15 | 0.69 | -14.35 | 183.80 | 0.34 | 107.72 | 10 uM | 69.39 | 0.46 | 496.17 | 172.70 | 0.31 | 100.68 |
|                            |                                  | Average Response                                                                                                                                                                                                                                                                                                                                                                                                                                                                                                                                                                                                                                                                   |                  |                        |                            |            |                      |                          |  |      |              |                        |                            |            |                      |                          |        |       |      |       |        |      |       |      |       |      |        |        |      |        |       |       |      |        |        |      |        |
|                            |                                  | Dose                                                                                                                                                                                                                                                                                                                                                                                                                                                                                                                                                                                                                                                                               | Green Signal     | Actual Pct Green Cells | Normalized Pct Green Cells | Red Signal | Actual Pct Red Cells | Normalized Pct Red Cells |  |      |              |                        |                            |            |                      |                          |        |       |      |       |        |      |       |      |       |      |        |        |      |        |       |       |      |        |        |      |        |
|                            |                                  | 0.1 uM                                                                                                                                                                                                                                                                                                                                                                                                                                                                                                                                                                                                                                                                             | 96.97            | 0.89                   | 16.95                      | 177.26     | 0.29                 | 83.89                    |  |      |              |                        |                            |            |                      |                          |        |       |      |       |        |      |       |      |       |      |        |        |      |        |       |       |      |        |        |      |        |
| 1 uM                       | 87.15                            | 0.69                                                                                                                                                                                                                                                                                                                                                                                                                                                                                                                                                                                                                                                                               | -14.35           | 183.80                 | 0.34                       | 107.72     |                      |                          |  |      |              |                        |                            |            |                      |                          |        |       |      |       |        |      |       |      |       |      |        |        |      |        |       |       |      |        |        |      |        |
| 10 uM                      | 69.39                            | 0.46                                                                                                                                                                                                                                                                                                                                                                                                                                                                                                                                                                                                                                                                               | 496.17           | 172.70                 | 0.31                       | 100.68     |                      |                          |  |      |              |                        |                            |            |                      |                          |        |       |      |       |        |      |       |      |       |      |        |        |      |        |       |       |      |        |        |      |        |

| Compound               | Normalized Values (A and B Sets) | Responses                                                                                                                                                                                                                                                                                                                                                                                                                                                                                                                                                                                                                                                                        |                  |                        |                            |            |                      |                          |  |      |              |                        |                            |            |                      |                          |        |       |      |       |       |      |        |      |        |      |        |       |      |        |       |       |      |       |       |      |        |
|------------------------|----------------------------------|----------------------------------------------------------------------------------------------------------------------------------------------------------------------------------------------------------------------------------------------------------------------------------------------------------------------------------------------------------------------------------------------------------------------------------------------------------------------------------------------------------------------------------------------------------------------------------------------------------------------------------------------------------------------------------|------------------|------------------------|----------------------------|------------|----------------------|--------------------------|--|------|--------------|------------------------|----------------------------|------------|----------------------|--------------------------|--------|-------|------|-------|-------|------|--------|------|--------|------|--------|-------|------|--------|-------|-------|------|-------|-------|------|--------|
| <b>Dronedarone HCl</b> |                                  | <table border="1"> <thead> <tr> <th colspan="7">Average Response</th> </tr> <tr> <th>Dose</th> <th>Green Signal</th> <th>Actual Pct Green Cells</th> <th>Normalized Pct Green Cells</th> <th>Red Signal</th> <th>Actual Pct Red Cells</th> <th>Normalized Pct Red Cells</th> </tr> </thead> <tbody> <tr> <td>0.1 uM</td> <td>95.11</td> <td>0.86</td> <td>75.50</td> <td>86.57</td> <td>0.06</td> <td>-37.38</td> </tr> <tr> <td>1 uM</td> <td>109.41</td> <td>0.94</td> <td>295.55</td> <td>92.25</td> <td>0.11</td> <td>-11.39</td> </tr> <tr> <td>10 uM</td> <td>87.25</td> <td>0.82</td> <td>10.73</td> <td>74.48</td> <td>0.04</td> <td>-34.87</td> </tr> </tbody> </table> | Average Response |                        |                            |            |                      |                          |  | Dose | Green Signal | Actual Pct Green Cells | Normalized Pct Green Cells | Red Signal | Actual Pct Red Cells | Normalized Pct Red Cells | 0.1 uM | 95.11 | 0.86 | 75.50 | 86.57 | 0.06 | -37.38 | 1 uM | 109.41 | 0.94 | 295.55 | 92.25 | 0.11 | -11.39 | 10 uM | 87.25 | 0.82 | 10.73 | 74.48 | 0.04 | -34.87 |
|                        |                                  | Average Response                                                                                                                                                                                                                                                                                                                                                                                                                                                                                                                                                                                                                                                                 |                  |                        |                            |            |                      |                          |  |      |              |                        |                            |            |                      |                          |        |       |      |       |       |      |        |      |        |      |        |       |      |        |       |       |      |       |       |      |        |
|                        |                                  | Dose                                                                                                                                                                                                                                                                                                                                                                                                                                                                                                                                                                                                                                                                             | Green Signal     | Actual Pct Green Cells | Normalized Pct Green Cells | Red Signal | Actual Pct Red Cells | Normalized Pct Red Cells |  |      |              |                        |                            |            |                      |                          |        |       |      |       |       |      |        |      |        |      |        |       |      |        |       |       |      |       |       |      |        |
|                        |                                  | 0.1 uM                                                                                                                                                                                                                                                                                                                                                                                                                                                                                                                                                                                                                                                                           | 95.11            | 0.86                   | 75.50                      | 86.57      | 0.06                 | -37.38                   |  |      |              |                        |                            |            |                      |                          |        |       |      |       |       |      |        |      |        |      |        |       |      |        |       |       |      |       |       |      |        |
| 1 uM                   | 109.41                           | 0.94                                                                                                                                                                                                                                                                                                                                                                                                                                                                                                                                                                                                                                                                             | 295.55           | 92.25                  | 0.11                       | -11.39     |                      |                          |  |      |              |                        |                            |            |                      |                          |        |       |      |       |       |      |        |      |        |      |        |       |      |        |       |       |      |       |       |      |        |
| 10 uM                  | 87.25                            | 0.82                                                                                                                                                                                                                                                                                                                                                                                                                                                                                                                                                                                                                                                                             | 10.73            | 74.48                  | 0.04                       | -34.87     |                      |                          |  |      |              |                        |                            |            |                      |                          |        |       |      |       |       |      |        |      |        |      |        |       |      |        |       |       |      |       |       |      |        |

Compound

Normalized Values (A and B Sets)

Responses

| Drospirenone | Percent Green Cells (AB) |  | Percent Red Cells (AB) |  | Average Response |              |                        |                            |            |                      |                          |
|--------------|--------------------------|--|------------------------|--|------------------|--------------|------------------------|----------------------------|------------|----------------------|--------------------------|
|              | Percent Response         |  | Percent Response       |  | Dose             | Green Signal | Actual Pct Green Cells | Normalized Pct Green Cells | Red Signal | Actual Pct Red Cells | Normalized Pct Red Cells |
|              | 0.1 uM 1 uM 10 uM        |  | 0.1 uM 1 uM 10 uM      |  | 0.1 uM           | 114.70       | 0.95                   | 146.03                     | 104.35     | 0.11                 | -16.03                   |
|              | concentration            |  | concentration          |  | 1 uM             | 106.15       | 0.83                   | 81.82                      | 110.94     | 0.15                 | 11.47                    |
|              |                          |  |                        |  | 10 uM            | 104.51       | 0.88                   | 104.89                     | 110.05     | 0.11                 | -6.25                    |

Compound

Normalized Values (A and B Sets)

Responses

| Droxinostat | Percent Green Cells (AB) |  | Percent Red Cells (AB) |  | Average Response |              |                        |                            |            |                      |                          |
|-------------|--------------------------|--|------------------------|--|------------------|--------------|------------------------|----------------------------|------------|----------------------|--------------------------|
|             | Percent Response         |  | Percent Response       |  | Dose             | Green Signal | Actual Pct Green Cells | Normalized Pct Green Cells | Red Signal | Actual Pct Red Cells | Normalized Pct Red Cells |
|             | 0.1 uM 1 uM 10 uM        |  | 0.1 uM 1 uM 10 uM      |  | 0.1 uM           | 103.56       | 0.89                   | 110.14                     | 104.14     | 0.09                 | -31.66                   |
|             | concentration            |  | concentration          |  | 1 uM             | 97.09        | 0.84                   | 14.76                      | 82.77      | 0.02                 | -46.45                   |
|             |                          |  |                        |  | 10 uM            | 114.10       | 0.90                   | 116.43                     | 116.34     | 0.12                 | -3.77                    |

Compound

Normalized Values (A and B Sets)

Responses

| Dutasteride | Percent Green Cells (AB) |  | Percent Red Cells (AB) |  | Average Response |              |                        |                            |            |                      |                          |
|-------------|--------------------------|--|------------------------|--|------------------|--------------|------------------------|----------------------------|------------|----------------------|--------------------------|
|             | Percent Response         |  | Percent Response       |  | Dose             | Green Signal | Actual Pct Green Cells | Normalized Pct Green Cells | Red Signal | Actual Pct Red Cells | Normalized Pct Red Cells |
|             | 0.1 uM 1 uM 10 uM        |  | 0.1 uM 1 uM 10 uM      |  | 0.1 uM           | 100.54       | 0.90                   | 109.66                     | 77.88      | 0.02                 | -61.54                   |
|             | concentration            |  | concentration          |  | 1 uM             | 101.20       | 0.86                   | 255.57                     | 93.44      | 0.09                 | -15.11                   |
|             |                          |  |                        |  | 10 uM            | 103.48       | 0.94                   | 124.06                     | 77.59      | 0.03                 | -35.82                   |

Compound

Normalized Values (A and B Sets)

Responses

| Dynasore | Percent Green Cells (AB) |  | Percent Red Cells (AB) |  | Average Response |              |                        |                            |            |                      |                          |
|----------|--------------------------|--|------------------------|--|------------------|--------------|------------------------|----------------------------|------------|----------------------|--------------------------|
|          | Percent Response         |  | Percent Response       |  | Dose             | Green Signal | Actual Pct Green Cells | Normalized Pct Green Cells | Red Signal | Actual Pct Red Cells | Normalized Pct Red Cells |
|          | 0.1 uM 1 uM 10 uM        |  | 0.1 uM 1 uM 10 uM      |  | 0.1 uM           | 101.27       | 0.89                   | 96.73                      | 99.31      | 0.11                 | -6.98                    |
|          | concentration            |  | concentration          |  | 1 uM             | 95.79        | 0.88                   | -42.97                     | 89.26      | 0.09                 | 4.31                     |
|          |                          |  |                        |  | 10 uM            | 90.64        | 0.86                   | 36.49                      | 74.59      | 0.06                 | -26.91                   |

Compound

Normalized Values (A and B Sets)

Responses

| Ebastine | Percent Green Cells (AB) |  | Percent Red Cells (AB) |  | Average Response |              |                        |                            |            |                      |                          |
|----------|--------------------------|--|------------------------|--|------------------|--------------|------------------------|----------------------------|------------|----------------------|--------------------------|
|          | Percent Response         |  | Percent Response       |  | Dose             | Green Signal | Actual Pct Green Cells | Normalized Pct Green Cells | Red Signal | Actual Pct Red Cells | Normalized Pct Red Cells |
|          | 0.1 uM 1 uM 10 uM        |  | 0.1 uM 1 uM 10 uM      |  | 0.1 uM           | 102.06       | 0.91                   | 63.42                      | 96.41      | 0.08                 | -24.83                   |
|          | concentration            |  | concentration          |  | 1 uM             | 100.05       | 0.82                   | 75.22                      | 81.94      | 0.05                 | -43.43                   |
|          |                          |  |                        |  | 10 uM            | 101.37       | 0.90                   | 113.08                     | 75.27      | 0.02                 | -52.71                   |

Compound

Normalized Values (A and B Sets)

Responses

| EBPC  |       |      | Average Response |              |                        |                            |            |                      |                          |
|-------|-------|------|------------------|--------------|------------------------|----------------------------|------------|----------------------|--------------------------|
|       |       |      | Dose             | Green Signal | Actual Pct Green Cells | Normalized Pct Green Cells | Red Signal | Actual Pct Red Cells | Normalized Pct Red Cells |
|       |       |      | 0.1 uM           | 88.08        | 0.78                   | 3.45                       | 68.36      | 0.01                 | -67.40                   |
|       |       |      | 1 uM             | 87.27        | 0.79                   | 377.23                     | 78.55      | 0.04                 | -34.01                   |
| 10 uM | 89.75 | 0.86 | 40.66            | 70.58        | 0.03                   | -39.01                     |            |                      |                          |

Compound

Normalized Values (A and B Sets)

Responses

| Edoxaban |       |      | Average Response |              |                        |                            |            |                      |                          |
|----------|-------|------|------------------|--------------|------------------------|----------------------------|------------|----------------------|--------------------------|
|          |       |      | Dose             | Green Signal | Actual Pct Green Cells | Normalized Pct Green Cells | Red Signal | Actual Pct Red Cells | Normalized Pct Red Cells |
|          |       |      | 0.1 uM           | 87.73        | 0.79                   | 12.13                      | 69.03      | 0.01                 | -68.42                   |
|          |       |      | 1 uM             | 93.04        | 0.83                   | 13.16                      | 66.96      | 0.01                 | -44.17                   |
| 10 uM    | 90.24 | 0.86 | 35.75            | 87.71        | 0.08                   | -18.35                     |            |                      |                          |

Compound

Normalized Values (A and B Sets)

Responses

| Efaproxiral Sodium |        |      | Average Response |              |                        |                            |            |                      |                          |
|--------------------|--------|------|------------------|--------------|------------------------|----------------------------|------------|----------------------|--------------------------|
|                    |        |      | Dose             | Green Signal | Actual Pct Green Cells | Normalized Pct Green Cells | Red Signal | Actual Pct Red Cells | Normalized Pct Red Cells |
|                    |        |      | 0.1 uM           | 93.82        | 0.90                   | 119.54                     | 75.12      | 0.02                 | -52.65                   |
|                    |        |      | 1 uM             | 93.56        | 0.80                   | 56.72                      | 75.54      | 0.04                 | -49.48                   |
| 10 uM              | 106.32 | 0.92 | 153.26           | 71.81        | 0.02                   | -51.50                     |            |                      |                          |

Compound

Normalized Values (A and B Sets)

Responses

| EHop-016 |       |      | Average Response |              |                        |                            |            |                      |                          |
|----------|-------|------|------------------|--------------|------------------------|----------------------------|------------|----------------------|--------------------------|
|          |       |      | Dose             | Green Signal | Actual Pct Green Cells | Normalized Pct Green Cells | Red Signal | Actual Pct Red Cells | Normalized Pct Red Cells |
|          |       |      | 0.1 uM           | 95.67        | 0.88                   | 92.17                      | 66.35      | 0.01                 | -70.71                   |
|          |       |      | 1 uM             | 94.51        | 0.83                   | 116.33                     | 77.45      | 0.03                 | -36.93                   |
| 10 uM    | 79.47 | 0.72 | -85.54           | 74.19        | 0.02                   | -40.35                     |            |                      |                          |

Compound

Normalized Values (A and B Sets)

Responses

| Elacridar |       |      | Average Response |              |                        |                            |            |                      |                          |
|-----------|-------|------|------------------|--------------|------------------------|----------------------------|------------|----------------------|--------------------------|
|           |       |      | Dose             | Green Signal | Actual Pct Green Cells | Normalized Pct Green Cells | Red Signal | Actual Pct Red Cells | Normalized Pct Red Cells |
|           |       |      | 0.1 uM           | 87.55        | 0.84                   | 57.20                      | 80.72      | 0.03                 | -56.31                   |
|           |       |      | 1 uM             | 84.39        | 0.78                   | 298.81                     | 66.18      | 0.01                 | -41.90                   |
| 10 uM     | 80.20 | 0.75 | -53.13           | 61.67        | 0.01                   | -45.17                     |            |                      |                          |

Compound

Normalized Values (A and B Sets)

Responses

| Elaiohylin | Percent Green Cells (AB) |      | Percent Red Cells (AB) |        | Average Response |              |                        |                            |            |                      |                          |       |       |
|------------|--------------------------|------|------------------------|--------|------------------|--------------|------------------------|----------------------------|------------|----------------------|--------------------------|-------|-------|
|            | Percent Response         |      | Percent Response       |        | Dose             | Green Signal | Actual Pct Green Cells | Normalized Pct Green Cells | Red Signal | Actual Pct Red Cells | Normalized Pct Red Cells |       |       |
|            | concentration            |      | concentration          |        | 0.1 uM           | 1 uM         | 10 uM                  | 0.1 uM                     | 1 uM       | 10 uM                | 0.1 uM                   | 1 uM  | 10 uM |
|            | 0.1 uM                   | 1 uM | 10 uM                  | 0.1 uM | 1 uM             | 10 uM        | 0.1 uM                 | 1 uM                       | 10 uM      | 0.1 uM               | 1 uM                     | 10 uM |       |
|            | 100                      | 60   | 100                    | 0      | 107.46           | 0.90         | 124.70                 | 106.46                     | 0.10       | -25.09               |                          |       |       |
|            | 100                      | 50   | 0                      | 50     | 108.80           | 0.86         | 73.70                  | 112.97                     | 0.14       | 7.54                 |                          |       |       |
|            | 100                      | 50   | 0                      | 0      | 86.76            | 0.65         | -58.34                 | 109.65                     | 0.09       | -13.05               |                          |       |       |

Compound

Normalized Values (A and B Sets)

Responses

| Eletriptan HBr | Percent Green Cells (AB) |      | Percent Red Cells (AB) |        | Average Response |              |                        |                            |            |                      |                          |       |       |
|----------------|--------------------------|------|------------------------|--------|------------------|--------------|------------------------|----------------------------|------------|----------------------|--------------------------|-------|-------|
|                | Percent Response         |      | Percent Response       |        | Dose             | Green Signal | Actual Pct Green Cells | Normalized Pct Green Cells | Red Signal | Actual Pct Red Cells | Normalized Pct Red Cells |       |       |
|                | concentration            |      | concentration          |        | 0.1 uM           | 1 uM         | 10 uM                  | 0.1 uM                     | 1 uM       | 10 uM                | 0.1 uM                   | 1 uM  | 10 uM |
|                | 0.1 uM                   | 1 uM | 10 uM                  | 0.1 uM | 1 uM             | 10 uM        | 0.1 uM                 | 1 uM                       | 10 uM      | 0.1 uM               | 1 uM                     | 10 uM |       |
|                | 100                      | 65   | 0                      | 0      | 91.88            | 0.88         | 129.09                 | 72.57                      | 0.03       | -48.65               |                          |       |       |
|                | 100                      | 35   | 0                      | 0      | 85.54            | 0.74         | 15.08                  | 82.64                      | 0.03       | -50.04               |                          |       |       |
|                | 100                      | 10   | 0                      | 0      | 86.73            | 0.75         | 8.26                   | 98.56                      | 0.08       | -20.87               |                          |       |       |

Compound

Normalized Values (A and B Sets)

Responses

| Eltrombopag | Percent Green Cells (AB) |      | Percent Red Cells (AB) |        | Average Response |              |                        |                            |            |                      |                          |       |       |
|-------------|--------------------------|------|------------------------|--------|------------------|--------------|------------------------|----------------------------|------------|----------------------|--------------------------|-------|-------|
|             | Percent Response         |      | Percent Response       |        | Dose             | Green Signal | Actual Pct Green Cells | Normalized Pct Green Cells | Red Signal | Actual Pct Red Cells | Normalized Pct Red Cells |       |       |
|             | concentration            |      | concentration          |        | 0.1 uM           | 1 uM         | 10 uM                  | 0.1 uM                     | 1 uM       | 10 uM                | 0.1 uM                   | 1 uM  | 10 uM |
|             | 0.1 uM                   | 1 uM | 10 uM                  | 0.1 uM | 1 uM             | 10 uM        | 0.1 uM                 | 1 uM                       | 10 uM      | 0.1 uM               | 1 uM                     | 10 uM |       |
|             | 100                      | 100  | 0                      | 25     | 110.30           | 0.96         | 166.26                 | 92.41                      | 0.10       | -5.80                |                          |       |       |
|             | 100                      | 100  | 0                      | 0      | 94.28            | 0.78         | 52.29                  | 96.61                      | 0.08       | -20.11               |                          |       |       |
|             | 100                      | 100  | 0                      | 35     | 102.15           | 0.92         | 274.36                 | 112.16                     | 0.15       | 13.80                |                          |       |       |

Compound

Normalized Values (A and B Sets)

Responses

| Elvitegravir (GS-9137, JTK-303) | Percent Green Cells (AB) |      | Percent Red Cells (AB) |        | Average Response |              |                        |                            |            |                      |                          |       |       |
|---------------------------------|--------------------------|------|------------------------|--------|------------------|--------------|------------------------|----------------------------|------------|----------------------|--------------------------|-------|-------|
|                                 | Percent Response         |      | Percent Response       |        | Dose             | Green Signal | Actual Pct Green Cells | Normalized Pct Green Cells | Red Signal | Actual Pct Red Cells | Normalized Pct Red Cells |       |       |
|                                 | concentration            |      | concentration          |        | 0.1 uM           | 1 uM         | 10 uM                  | 0.1 uM                     | 1 uM       | 10 uM                | 0.1 uM                   | 1 uM  | 10 uM |
|                                 | 0.1 uM                   | 1 uM | 10 uM                  | 0.1 uM | 1 uM             | 10 uM        | 0.1 uM                 | 1 uM                       | 10 uM      | 0.1 uM               | 1 uM                     | 10 uM |       |
|                                 | 100                      | 65   | 0                      | 0      | 92.49            | 0.84         | 38.31                  | 90.02                      | 0.06       | -45.44               |                          |       |       |
|                                 | 100                      | 75   | 0                      | 0      | 97.16            | 0.82         | -5.92                  | 96.98                      | 0.08       | -22.34               |                          |       |       |
|                                 | 100                      | 20   | 0                      | 0      | 82.62            | 0.69         | -25.85                 | 95.93                      | 0.06       | -26.47               |                          |       |       |

Compound

Normalized Values (A and B Sets)

Responses

| EMD 1214063 | Percent Green Cells (AB) |      | Percent Red Cells (AB) |        | Average Response |              |                        |                            |            |                      |                          |       |       |
|-------------|--------------------------|------|------------------------|--------|------------------|--------------|------------------------|----------------------------|------------|----------------------|--------------------------|-------|-------|
|             | Percent Response         |      | Percent Response       |        | Dose             | Green Signal | Actual Pct Green Cells | Normalized Pct Green Cells | Red Signal | Actual Pct Red Cells | Normalized Pct Red Cells |       |       |
|             | concentration            |      | concentration          |        | 0.1 uM           | 1 uM         | 10 uM                  | 0.1 uM                     | 1 uM       | 10 uM                | 0.1 uM                   | 1 uM  | 10 uM |
|             | 0.1 uM                   | 1 uM | 10 uM                  | 0.1 uM | 1 uM             | 10 uM        | 0.1 uM                 | 1 uM                       | 10 uM      | 0.1 uM               | 1 uM                     | 10 uM |       |
|             | 100                      | 45   | 0                      | 0      | 79.52            | 0.67         | 742.84                 | 64.78                      | 0.02       | -52.07               |                          |       |       |
|             | 100                      | 100  | 0                      | 0      | 108.62           | 0.89         | 123.73                 | 108.10                     | 0.14       | 4.22                 |                          |       |       |
|             | 100                      | 100  | 0                      | 0      | 92.17            | 0.78         | 70.87                  | 82.14                      | 0.04       | -41.65               |                          |       |       |

Compound

Normalized Values (A and B Sets)

Responses

| Emetine |       |      | Average Response |              |                        |                            |            |                      |                          |
|---------|-------|------|------------------|--------------|------------------------|----------------------------|------------|----------------------|--------------------------|
|         |       |      | Dose             | Green Signal | Actual Pct Green Cells | Normalized Pct Green Cells | Red Signal | Actual Pct Red Cells | Normalized Pct Red Cells |
|         |       |      | 0.1 uM           | 108.15       | 0.82                   | 165.76                     | 94.56      | 0.13                 | 0.84                     |
|         |       |      | 1 uM             | 67.39        | 0.48                   | 185.19                     | 73.59      | 0.06                 | -35.89                   |
| 10 uM   | 82.42 | 0.66 | 221.66           | 76.66        | 0.05                   | -38.87                     |            |                      |                          |

Compound

Normalized Values (A and B Sets)

Responses

| Empagliflozin (BI 10773) |       |      | Average Response |              |                        |                            |            |                      |                          |
|--------------------------|-------|------|------------------|--------------|------------------------|----------------------------|------------|----------------------|--------------------------|
|                          |       |      | Dose             | Green Signal | Actual Pct Green Cells | Normalized Pct Green Cells | Red Signal | Actual Pct Red Cells | Normalized Pct Red Cells |
|                          |       |      | 0.1 uM           | 76.53        | 0.68                   | -89.44                     | 75.02      | 0.02                 | -65.69                   |
|                          |       |      | 1 uM             | 83.96        | 0.67                   | 54.80                      | 85.84      | 0.05                 | -31.58                   |
| 10 uM                    | 81.17 | 0.78 | -30.72           | 67.83        | 0.01                   | -44.83                     |            |                      |                          |

Compound

Normalized Values (A and B Sets)

Responses

| Emtricitabine |       |      | Average Response |              |                        |                            |            |                      |                          |
|---------------|-------|------|------------------|--------------|------------------------|----------------------------|------------|----------------------|--------------------------|
|               |       |      | Dose             | Green Signal | Actual Pct Green Cells | Normalized Pct Green Cells | Red Signal | Actual Pct Red Cells | Normalized Pct Red Cells |
|               |       |      | 0.1 uM           | 75.12        | 0.57                   | 202.28                     | 95.22      | 0.09                 | -15.13                   |
|               |       |      | 1 uM             | 85.80        | 0.76                   | 161.89                     | 97.85      | 0.12                 | -2.90                    |
| 10 uM         | 90.47 | 0.82 | 3.82             | 104.59       | 0.19                   | 30.34                      |            |                      |                          |

Compound

Normalized Values (A and B Sets)

Responses

| Enalaprilat Dihydrate |        |      | Average Response |              |                        |                            |            |                      |                          |
|-----------------------|--------|------|------------------|--------------|------------------------|----------------------------|------------|----------------------|--------------------------|
|                       |        |      | Dose             | Green Signal | Actual Pct Green Cells | Normalized Pct Green Cells | Red Signal | Actual Pct Red Cells | Normalized Pct Red Cells |
|                       |        |      | 0.1 uM           | 112.47       | 0.92                   | 111.57                     | 102.39     | 0.10                 | -17.25                   |
|                       |        |      | 1 uM             | 110.56       | 0.91                   | 122.63                     | 83.13      | 0.04                 | -40.01                   |
| 10 uM                 | 106.15 | 0.87 | 89.21            | 126.83       | 0.16                   | 18.23                      |            |                      |                          |

Compound

Normalized Values (A and B Sets)

Responses

| ENMD-2076 | Average Response |              |                        |                            |            |                      |                          |
|-----------|------------------|--------------|------------------------|----------------------------|------------|----------------------|--------------------------|
|           | Dose             | Green Signal | Actual Pct Green Cells | Normalized Pct Green Cells | Red Signal | Actual Pct Red Cells | Normalized Pct Red Cells |
| 0.1 uM    | 89.98            | 0.73         | 5.56                   | 101.98                     | 0.11       | -9.99                |                          |

Compound

Normalized Values (A and B Sets)

Responses

|  |                                                                                                                                                                      |        |      |       |        |      |       |  |  |
|--|----------------------------------------------------------------------------------------------------------------------------------------------------------------------|--------|------|-------|--------|------|-------|--|--|
|  | 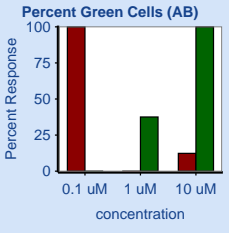  |        |      |       |        |      |       |  |  |
|  | 1 uM                                                                                                                                                                 | 95.87  | 0.80 | -4.77 | 125.09 | 0.18 | 25.20 |  |  |
|  | 10 uM                                                                                                                                                                | 110.79 | 0.83 | 78.89 | 141.84 | 0.18 | 26.07 |  |  |

Compound

Normalized Values (A and B Sets)

Responses

|                  |                                                                                                                                                                      |              |                         |                            |            |                      |                          |  |  |
|------------------|----------------------------------------------------------------------------------------------------------------------------------------------------------------------|--------------|-------------------------|----------------------------|------------|----------------------|--------------------------|--|--|
| <b>Enoxolone</b> | 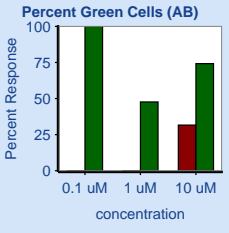  |              | <b>Average Response</b> |                            |            |                      |                          |  |  |
|                  | Dose                                                                                                                                                                 | Green Signal | Actual Pct Green Cells  | Normalized Pct Green Cells | Red Signal | Actual Pct Red Cells | Normalized Pct Red Cells |  |  |
|                  | 0.1 uM                                                                                                                                                               | 89.32        | 0.81                    | 28.36                      | 72.38      | 0.01                 | -66.95                   |  |  |
|                  | 1 uM                                                                                                                                                                 | 81.70        | 0.73                    | 885.90                     | 79.56      | 0.04                 | -24.48                   |  |  |
|                  | 10 uM                                                                                                                                                                | 94.96        | 0.87                    | 52.91                      | 105.07     | 0.15                 | 14.14                    |  |  |

Compound

Normalized Values (A and B Sets)

Responses

|                          |                                                                                                                                                                        |              |                         |                            |            |                      |                          |  |  |
|--------------------------|------------------------------------------------------------------------------------------------------------------------------------------------------------------------|--------------|-------------------------|----------------------------|------------|----------------------|--------------------------|--|--|
| <b>Entecavir Hydrate</b> | 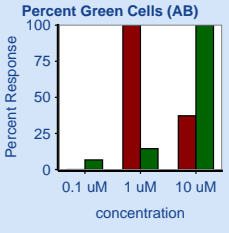  |              | <b>Average Response</b> |                            |            |                      |                          |  |  |
|                          | Dose                                                                                                                                                                   | Green Signal | Actual Pct Green Cells  | Normalized Pct Green Cells | Red Signal | Actual Pct Red Cells | Normalized Pct Red Cells |  |  |
|                          | 0.1 uM                                                                                                                                                                 | 76.08        | 0.69                    | 121.53                     | 87.01      | 0.04                 | -51.14                   |  |  |
|                          | 1 uM                                                                                                                                                                   | 94.01        | 0.83                    | 57.85                      | 91.58      | 0.05                 | -32.53                   |  |  |
|                          | 10 uM                                                                                                                                                                  | 95.63        | 0.83                    | 70.72                      | 101.31     | 0.06                 | -27.00                   |  |  |

Compound

Normalized Values (A and B Sets)

Responses

|                               |                                                                                                                                                                          |              |                         |                            |            |                      |                          |  |  |
|-------------------------------|--------------------------------------------------------------------------------------------------------------------------------------------------------------------------|--------------|-------------------------|----------------------------|------------|----------------------|--------------------------|--|--|
| <b>Enzalutamide (MDV3100)</b> | 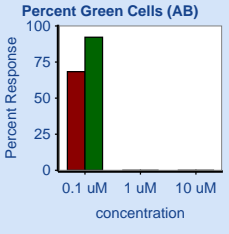  |              | <b>Average Response</b> |                            |            |                      |                          |  |  |
|                               | Dose                                                                                                                                                                     | Green Signal | Actual Pct Green Cells  | Normalized Pct Green Cells | Red Signal | Actual Pct Red Cells | Normalized Pct Red Cells |  |  |
|                               | 0.1 uM                                                                                                                                                                   | 96.68        | 0.89                    | 80.27                      | 83.66      | 0.04                 | -53.52                   |  |  |
|                               | 1 uM                                                                                                                                                                     | 77.44        | 0.63                    | 191.88                     | 90.83      | 0.04                 | -36.89                   |  |  |
|                               | 10 uM                                                                                                                                                                    | 81.11        | 0.68                    | -27.22                     | 71.40      | 0.01                 | -46.77                   |  |  |

Compound

Normalized Values (A and B Sets)

Responses

|                   |                                                                                                                                                                          |              |                         |                            |            |                      |                          |  |  |
|-------------------|--------------------------------------------------------------------------------------------------------------------------------------------------------------------------|--------------|-------------------------|----------------------------|------------|----------------------|--------------------------|--|--|
| <b>Epalrestat</b> | 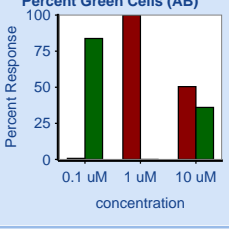  |              | <b>Average Response</b> |                            |            |                      |                          |  |  |
|                   | Dose                                                                                                                                                                     | Green Signal | Actual Pct Green Cells  | Normalized Pct Green Cells | Red Signal | Actual Pct Red Cells | Normalized Pct Red Cells |  |  |
|                   | 0.1 uM                                                                                                                                                                   | 95.56        | 0.85                    | 42.25                      | 87.09      | 0.06                 | -44.06                   |  |  |
|                   | 1 uM                                                                                                                                                                     | 106.67       | 0.84                    | 90.39                      | 90.92      | 0.08                 | -22.02                   |  |  |
|                   | 10 uM                                                                                                                                                                    | 89.10        | 0.79                    | 43.23                      | 102.77     | 0.09                 | -16.18                   |  |  |



| Compound              | Normalized Values (A and B Sets)                                                   | Responses        |              |                        |                            |            |                      |                          |
|-----------------------|------------------------------------------------------------------------------------|------------------|--------------|------------------------|----------------------------|------------|----------------------|--------------------------|
| <b>Epinastine HCl</b> | 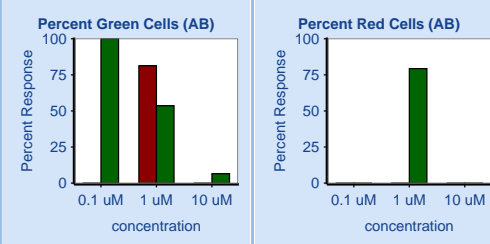 | Average Response |              |                        |                            |            |                      |                          |
|                       |                                                                                    | Dose             | Green Signal | Actual Pct Green Cells | Normalized Pct Green Cells | Red Signal | Actual Pct Red Cells | Normalized Pct Red Cells |
|                       |                                                                                    | 0.1 uM           | 89.79        | 0.78                   | 500.25                     | 90.96      | 0.10                 | -14.18                   |
|                       |                                                                                    | 1 uM             | 90.00        | 0.81                   | 67.46                      | 111.48     | 0.18                 | 20.84                    |
| 10 uM                 | 78.71                                                                              | 0.64             | 166.17       | 87.41                  | 0.08                       | -19.10     |                      |                          |

| Compound                      | Normalized Values (A and B Sets)                                                   | Responses        |              |                        |                            |            |                      |                          |
|-------------------------------|------------------------------------------------------------------------------------|------------------|--------------|------------------------|----------------------------|------------|----------------------|--------------------------|
| <b>Epinephrine Bitartrate</b> | 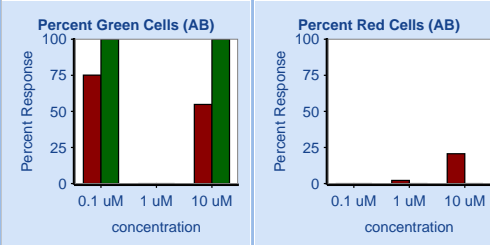 | Average Response |              |                        |                            |            |                      |                          |
|                               |                                                                                    | Dose             | Green Signal | Actual Pct Green Cells | Normalized Pct Green Cells | Red Signal | Actual Pct Red Cells | Normalized Pct Red Cells |
|                               |                                                                                    | 0.1 uM           | 93.13        | 0.88                   | 93.02                      | 74.71      | 0.01                 | -69.29                   |
|                               |                                                                                    | 1 uM             | 80.15        | 0.74                   | 507.15                     | 89.38      | 0.06                 | -24.03                   |
| 10 uM                         | 104.46                                                                             | 0.92             | 95.99        | 101.22                 | 0.13                       | 7.07       |                      |                          |

| Compound               | Normalized Values (A and B Sets)                                                     | Responses        |              |                        |                            |            |                      |                          |
|------------------------|--------------------------------------------------------------------------------------|------------------|--------------|------------------------|----------------------------|------------|----------------------|--------------------------|
| <b>Epinephrine HCl</b> | 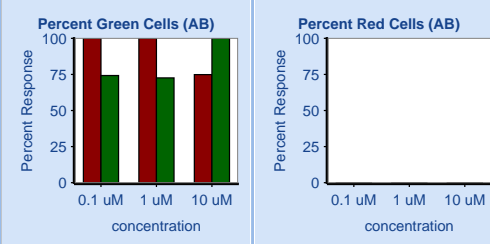 | Average Response |              |                        |                            |            |                      |                          |
|                        |                                                                                      | Dose             | Green Signal | Actual Pct Green Cells | Normalized Pct Green Cells | Red Signal | Actual Pct Red Cells | Normalized Pct Red Cells |
|                        |                                                                                      | 0.1 uM           | 101.93       | 0.90                   | 190.53                     | 81.33      | 0.05                 | -40.18                   |
|                        |                                                                                      | 1 uM             | 103.87       | 0.87                   | 104.30                     | 93.28      | 0.09                 | -21.79                   |
| 10 uM                  | 104.66                                                                               | 0.87             | 89.36        | 93.46                  | 0.06                       | -30.52     |                      |                          |

| Compound            | Normalized Values (A and B Sets)                                                     | Responses        |              |                        |                            |            |                      |                          |
|---------------------|--------------------------------------------------------------------------------------|------------------|--------------|------------------------|----------------------------|------------|----------------------|--------------------------|
| <b>Epothilone A</b> | 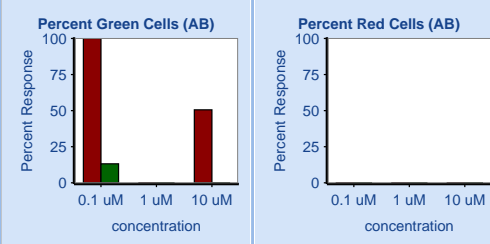 | Average Response |              |                        |                            |            |                      |                          |
|                     |                                                                                      | Dose             | Green Signal | Actual Pct Green Cells | Normalized Pct Green Cells | Red Signal | Actual Pct Red Cells | Normalized Pct Red Cells |
|                     |                                                                                      | 0.1 uM           | 94.99        | 0.83                   | 58.41                      | 94.58      | 0.07                 | -37.87                   |
|                     |                                                                                      | 1 uM             | 87.80        | 0.65                   | 154.99                     | 88.23      | 0.07                 | -27.62                   |
| 10 uM               | 95.30                                                                                | 0.76             | 19.00        | 110.12                 | 0.10                       | -10.21     |                      |                          |

| Compound                                 | Normalized Values (A and B Sets) | Responses        |              |                        |                            |            |
|------------------------------------------|----------------------------------|------------------|--------------|------------------------|----------------------------|------------|
| <b>Epothilone B (EPO906, Patupilone)</b> |                                  | Average Response |              |                        |                            |            |
|                                          |                                  | Dose             | Green Signal | Actual Pct Green Cells | Normalized Pct Green Cells | Red Signal |
| 0.1 uM                                   | 102.74                           | 0.82             | -9.27        | 112.20                 | 0.14                       | 1.73       |

Compound

Normalized Values (A and B Sets)

Responses

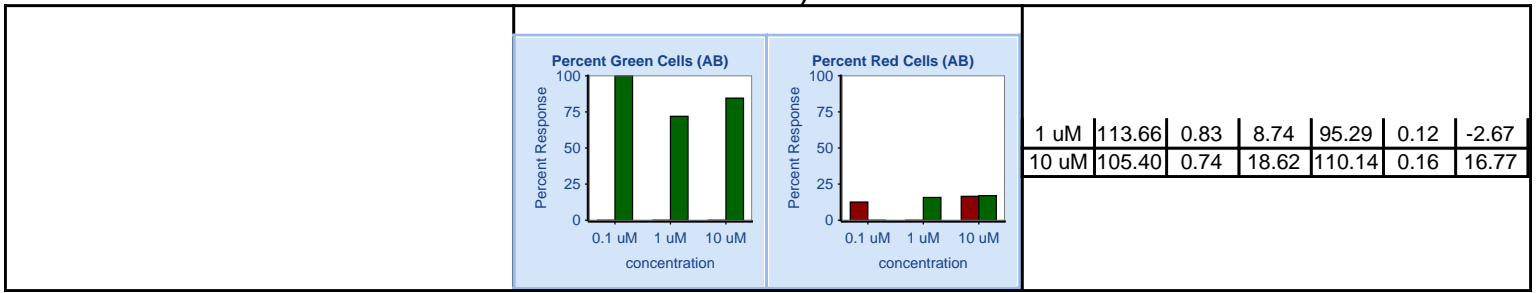

|       |        |      |       |        |      |       |
|-------|--------|------|-------|--------|------|-------|
| 1 uM  | 113.66 | 0.83 | 8.74  | 95.29  | 0.12 | -2.67 |
| 10 uM | 105.40 | 0.74 | 18.62 | 110.14 | 0.16 | 16.77 |

Compound

Normalized Values (A and B Sets)

Responses

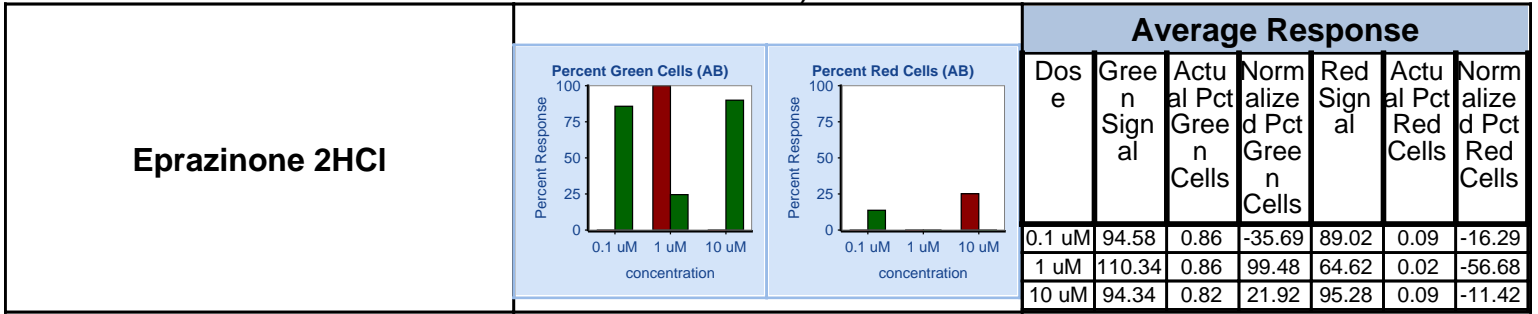

Eprazinone 2HCl

Average Response

| Dose   | Green Signal | Actual Pct Green Cells | Normalized Pct Green Cells | Red Signal | Actual Pct Red Cells | Normalized Pct Red Cells |
|--------|--------------|------------------------|----------------------------|------------|----------------------|--------------------------|
| 0.1 uM | 94.58        | 0.86                   | -35.69                     | 89.02      | 0.09                 | -16.29                   |
| 1 uM   | 110.34       | 0.86                   | 99.48                      | 64.62      | 0.02                 | -56.68                   |
| 10 uM  | 94.34        | 0.82                   | 21.92                      | 95.28      | 0.09                 | -11.42                   |

Compound

Normalized Values (A and B Sets)

Responses

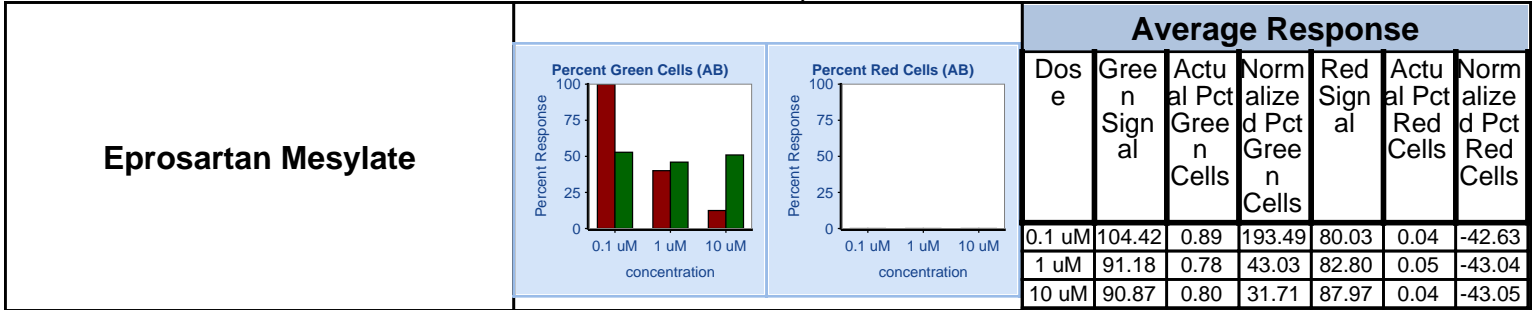

Eprosartan Mesylate

Average Response

| Dose   | Green Signal | Actual Pct Green Cells | Normalized Pct Green Cells | Red Signal | Actual Pct Red Cells | Normalized Pct Red Cells |
|--------|--------------|------------------------|----------------------------|------------|----------------------|--------------------------|
| 0.1 uM | 104.42       | 0.89                   | 193.49                     | 80.03      | 0.04                 | -42.63                   |
| 1 uM   | 91.18        | 0.78                   | 43.03                      | 82.80      | 0.05                 | -43.04                   |
| 10 uM  | 90.87        | 0.80                   | 31.71                      | 87.97      | 0.04                 | -43.05                   |

Compound

Normalized Values (A and B Sets)

Responses

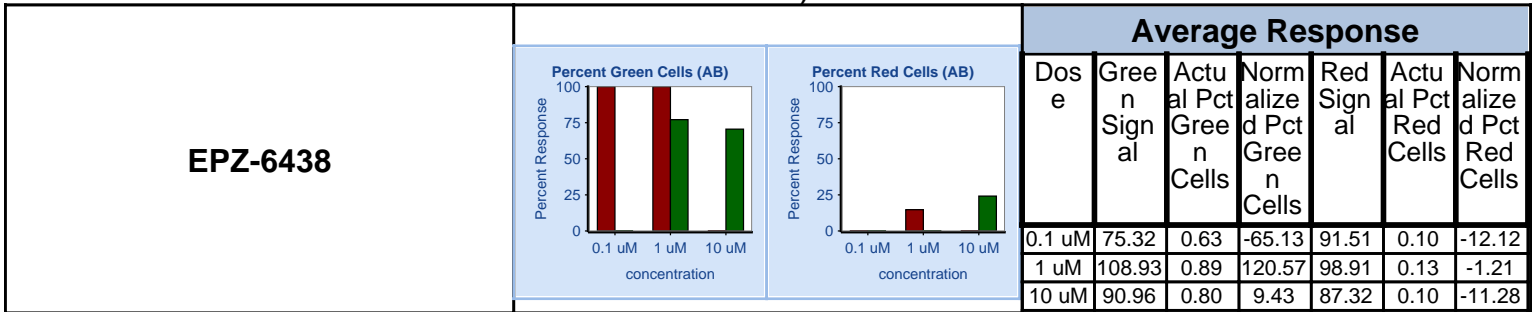

EPZ-6438

Average Response

| Dose   | Green Signal | Actual Pct Green Cells | Normalized Pct Green Cells | Red Signal | Actual Pct Red Cells | Normalized Pct Red Cells |
|--------|--------------|------------------------|----------------------------|------------|----------------------|--------------------------|
| 0.1 uM | 75.32        | 0.63                   | -65.13                     | 91.51      | 0.10                 | -12.12                   |
| 1 uM   | 108.93       | 0.89                   | 120.57                     | 98.91      | 0.13                 | -1.21                    |
| 10 uM  | 90.96        | 0.80                   | 9.43                       | 87.32      | 0.10                 | -11.28                   |

Compound

Normalized Values (A and B Sets)

Responses

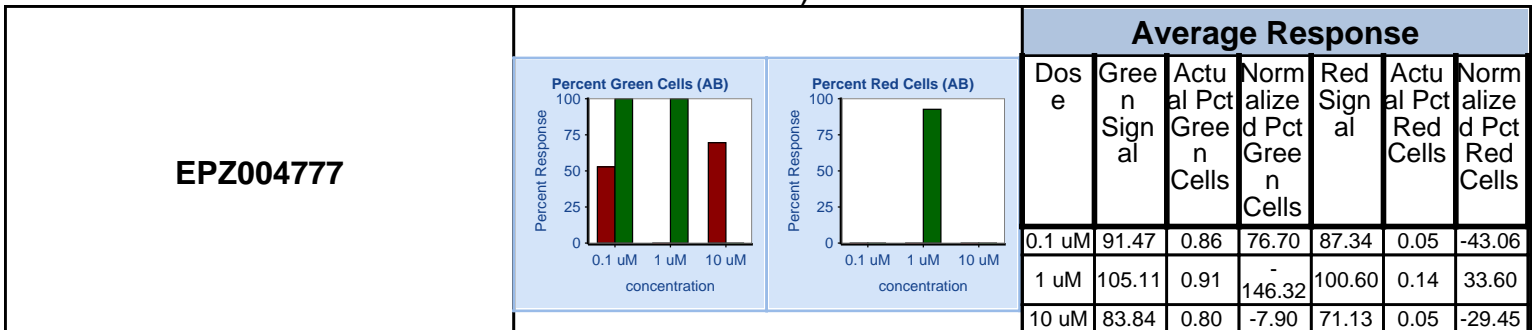

EPZ004777

Average Response

| Dose   | Green Signal | Actual Pct Green Cells | Normalized Pct Green Cells | Red Signal | Actual Pct Red Cells | Normalized Pct Red Cells |
|--------|--------------|------------------------|----------------------------|------------|----------------------|--------------------------|
| 0.1 uM | 91.47        | 0.86                   | 76.70                      | 87.34      | 0.05                 | -43.06                   |
| 1 uM   | 105.11       | 0.91                   | 146.32                     | 100.60     | 0.14                 | 33.60                    |
| 10 uM  | 83.84        | 0.80                   | -7.90                      | 71.13      | 0.05                 | -29.45                   |

Compound

Normalized Values (A and B Sets)

Responses

EPZ004777 HCl

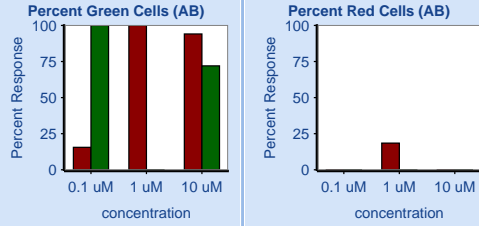

| Average Response |              |                        |                            |            |                      |                          |
|------------------|--------------|------------------------|----------------------------|------------|----------------------|--------------------------|
| Dose             | Green Signal | Actual Pct Green Cells | Normalized Pct Green Cells | Red Signal | Actual Pct Red Cells | Normalized Pct Red Cells |
| 0.1 uM           | 100.84       | 0.90                   | 64.02                      | 92.05      | 0.09                 | -18.76                   |
| 1 uM             | 98.62        | 0.83                   | 76.16                      | 103.65     | 0.11                 | -10.54                   |
| 10 uM            | 98.66        | 0.85                   | 83.05                      | 64.16      | 0.02                 | -55.97                   |

Compound

Normalized Values (A and B Sets)

Responses

EPZ5676

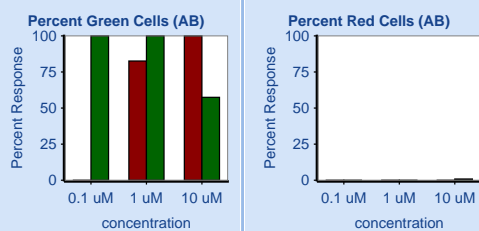

| Average Response |              |                        |                            |            |                      |                          |
|------------------|--------------|------------------------|----------------------------|------------|----------------------|--------------------------|
| Dose             | Green Signal | Actual Pct Green Cells | Normalized Pct Green Cells | Red Signal | Actual Pct Red Cells | Normalized Pct Red Cells |
| 0.1 uM           | 98.33        | 0.89                   | -83.50                     | 85.98      | 0.07                 | -29.16                   |
| 1 uM             | 109.14       | 0.87                   | 113.99                     | 90.94      | 0.08                 | -24.96                   |
| 10 uM            | 100.14       | 0.85                   | 102.32                     | 96.08      | 0.11                 | -7.46                    |

Compound

Normalized Values (A and B Sets)

Responses

EPZ005687

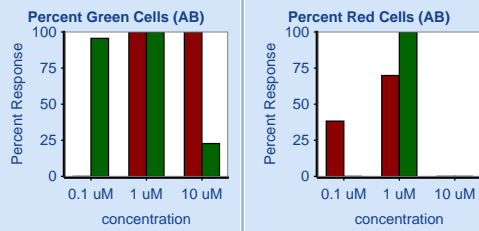

| Average Response |              |                        |                            |            |                      |                          |
|------------------|--------------|------------------------|----------------------------|------------|----------------------|--------------------------|
| Dose             | Green Signal | Actual Pct Green Cells | Normalized Pct Green Cells | Red Signal | Actual Pct Red Cells | Normalized Pct Red Cells |
| 0.1 uM           | 87.26        | 0.78                   | 421.50                     | 100.60     | 0.15                 | 12.35                    |
| 1 uM             | 114.67       | 0.92                   | 144.13                     | 129.60     | 0.30                 | 86.86                    |
| 10 uM            | 88.62        | 0.80                   | 61.83                      | 82.87      | 0.04                 | -41.28                   |

Compound

Normalized Values (A and B Sets)

Responses

Equol

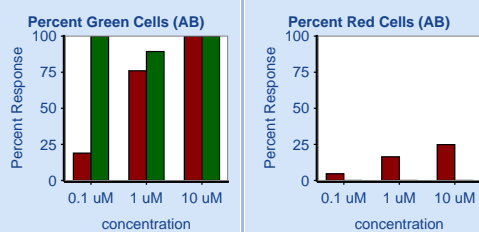

| Average Response |              |                        |                            |            |                      |                          |
|------------------|--------------|------------------------|----------------------------|------------|----------------------|--------------------------|
| Dose             | Green Signal | Actual Pct Green Cells | Normalized Pct Green Cells | Red Signal | Actual Pct Red Cells | Normalized Pct Red Cells |
| 0.1 uM           | 96.55        | 0.86                   | 66.01                      | 99.98      | 0.10                 | -6.45                    |
| 1 uM             | 102.15       | 0.86                   | 82.67                      | 95.64      | 0.09                 | -14.40                   |
| 10 uM            | 104.90       | 0.93                   | 353.30                     | 111.50     | 0.12                 | -0.26                    |

Compound

Normalized Values (A and B Sets)

Responses

Erastin

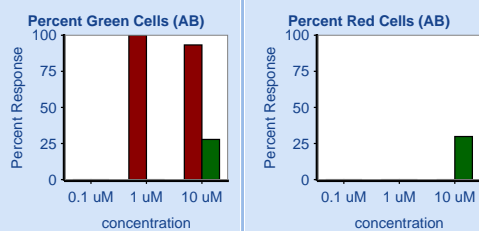

| Average Response |              |                        |                            |            |                      |                          |
|------------------|--------------|------------------------|----------------------------|------------|----------------------|--------------------------|
| Dose             | Green Signal | Actual Pct Green Cells | Normalized Pct Green Cells | Red Signal | Actual Pct Red Cells | Normalized Pct Red Cells |
| 0.1 uM           | 65.88        | 0.52                   | 214.27                     | 70.73      | 0.01                 | -67.12                   |
| 1 uM             | 87.28        | 0.76                   | 45.24                      | 63.09      | 0.02                 | -38.76                   |
| 10 uM            | 89.72        | 0.87                   | 60.56                      | 78.27      | 0.10                 | -7.73                    |

Compound

Normalized Values (A and B Sets)

Responses

| Erdosteine | Percent Green Cells (AB) |  | Percent Red Cells (AB) |  | Average Response |              |                        |                            |            |                      |                          |
|------------|--------------------------|--|------------------------|--|------------------|--------------|------------------------|----------------------------|------------|----------------------|--------------------------|
|            | Percent Response         |  | Percent Response       |  | Dose             | Green Signal | Actual Pct Green Cells | Normalized Pct Green Cells | Red Signal | Actual Pct Red Cells | Normalized Pct Red Cells |
|            | 100                      |  | 100                    |  | 0.1 uM           | 103.91       | 0.90                   | 96.67                      | 93.68      | 0.05                 | -48.25                   |
|            | 0                        |  | 0                      |  | 1 uM             | 110.12       | 0.90                   | 89.96                      | 88.19      | 0.05                 | -33.66                   |
|            | 0.1 uM                   |  | 0.1 uM                 |  | 10 uM            | 91.13        | 0.76                   | 18.49                      | 95.09      | 0.05                 | -31.44                   |
|            | 1 uM                     |  | 1 uM                   |  |                  |              |                        |                            |            |                      |                          |
|            | 10 uM                    |  | 10 uM                  |  |                  |              |                        |                            |            |                      |                          |

Compound

Normalized Values (A and B Sets)

Responses

| Ergosterol | Percent Green Cells (AB) |  | Percent Red Cells (AB) |  | Average Response |              |                        |                            |            |                      |                          |
|------------|--------------------------|--|------------------------|--|------------------|--------------|------------------------|----------------------------|------------|----------------------|--------------------------|
|            | Percent Response         |  | Percent Response       |  | Dose             | Green Signal | Actual Pct Green Cells | Normalized Pct Green Cells | Red Signal | Actual Pct Red Cells | Normalized Pct Red Cells |
|            | 100                      |  | 100                    |  | 0.1 uM           | 106.19       | 0.93                   | 138.86                     | 94.03      | 0.07                 | -31.36                   |
|            | 0                        |  | 0                      |  | 1 uM             | 102.44       | 0.92                   | 145.88                     | 96.99      | 0.09                 | -6.11                    |
|            | 0.1 uM                   |  | 0.1 uM                 |  | 10 uM            | 106.35       | 0.93                   | 112.95                     | 92.34      | 0.13                 | 5.09                     |
|            | 1 uM                     |  | 1 uM                   |  |                  |              |                        |                            |            |                      |                          |
|            | 10 uM                    |  | 10 uM                  |  |                  |              |                        |                            |            |                      |                          |

Compound

Normalized Values (A and B Sets)

Responses

| Erlotinib HCl (OSI-744) | Percent Green Cells (AB) |  | Percent Red Cells (AB) |  | Average Response |              |                        |                            |            |                      |                          |
|-------------------------|--------------------------|--|------------------------|--|------------------|--------------|------------------------|----------------------------|------------|----------------------|--------------------------|
|                         | Percent Response         |  | Percent Response       |  | Dose             | Green Signal | Actual Pct Green Cells | Normalized Pct Green Cells | Red Signal | Actual Pct Red Cells | Normalized Pct Red Cells |
|                         | 100                      |  | 100                    |  | 0.1 uM           | 77.85        | 0.61                   | 172.21                     | 74.93      | 0.02                 | -64.77                   |
|                         | 0                        |  | 0                      |  | 1 uM             | 73.53        | 0.55                   | -36.98                     | 89.21      | 0.09                 | -16.72                   |
|                         | 0.1 uM                   |  | 0.1 uM                 |  | 10 uM            | 92.67        | 0.94                   | 123.49                     | 79.54      | 0.04                 | -31.64                   |
|                         | 1 uM                     |  | 1 uM                   |  |                  |              |                        |                            |            |                      |                          |
|                         | 10 uM                    |  | 10 uM                  |  |                  |              |                        |                            |            |                      |                          |

Compound

Normalized Values (A and B Sets)

Responses

| Erteberel (LY500307) | Percent Green Cells (AB) |  | Percent Red Cells (AB) |  | Average Response |              |                        |                            |            |                      |                          |
|----------------------|--------------------------|--|------------------------|--|------------------|--------------|------------------------|----------------------------|------------|----------------------|--------------------------|
|                      | Percent Response         |  | Percent Response       |  | Dose             | Green Signal | Actual Pct Green Cells | Normalized Pct Green Cells | Red Signal | Actual Pct Red Cells | Normalized Pct Red Cells |
|                      | 100                      |  | 100                    |  | 0.1 uM           | 105.51       | 0.86                   | 86.31                      | 95.69      | 0.08                 | -29.41                   |
|                      | 0                        |  | 0                      |  | 1 uM             | 113.33       | 0.91                   | 98.28                      | 112.65     | 0.15                 | 8.22                     |
|                      | 0.1 uM                   |  | 0.1 uM                 |  | 10 uM            | 102.15       | 0.76                   | 22.02                      | 114.84     | 0.17                 | 21.41                    |
|                      | 1 uM                     |  | 1 uM                   |  |                  |              |                        |                            |            |                      |                          |
|                      | 10 uM                    |  | 10 uM                  |  |                  |              |                        |                            |            |                      |                          |

Compound

Normalized Values (A and B Sets)

Responses

| Erythritol | Percent Green Cells (AB) |  | Percent Red Cells (AB) |  | Average Response |              |                        |                            |            |                      |                          |
|------------|--------------------------|--|------------------------|--|------------------|--------------|------------------------|----------------------------|------------|----------------------|--------------------------|
|            | Percent Response         |  | Percent Response       |  | Dose             | Green Signal | Actual Pct Green Cells | Normalized Pct Green Cells | Red Signal | Actual Pct Red Cells | Normalized Pct Red Cells |
|            | 100                      |  | 100                    |  | 0.1 uM           | 106.11       | 0.92                   | 212.84                     | 92.01      | 0.09                 | -19.09                   |
|            | 0                        |  | 0                      |  | 1 uM             | 94.05        | 0.78                   | 43.11                      | 109.48     | 0.16                 | 14.33                    |
|            | 0.1 uM                   |  | 0.1 uM                 |  | 10 uM            | 94.34        | 0.79                   | 14.94                      | 102.23     | 0.13                 | 3.64                     |
|            | 1 uM                     |  | 1 uM                   |  |                  |              |                        |                            |            |                      |                          |
|            | 10 uM                    |  | 10 uM                  |  |                  |              |                        |                            |            |                      |                          |

| Compound            | Normalized Values (A and B Sets) | Responses                                                                                                                                                                                                                                                                                                                                                                                                                                                                                                                                                                                                                                                                        |                  |                        |                            |            |                      |                          |  |      |              |                        |                            |            |                      |                          |        |        |      |        |       |      |        |      |        |      |       |       |      |        |       |       |      |       |        |      |      |
|---------------------|----------------------------------|----------------------------------------------------------------------------------------------------------------------------------------------------------------------------------------------------------------------------------------------------------------------------------------------------------------------------------------------------------------------------------------------------------------------------------------------------------------------------------------------------------------------------------------------------------------------------------------------------------------------------------------------------------------------------------|------------------|------------------------|----------------------------|------------|----------------------|--------------------------|--|------|--------------|------------------------|----------------------------|------------|----------------------|--------------------------|--------|--------|------|--------|-------|------|--------|------|--------|------|-------|-------|------|--------|-------|-------|------|-------|--------|------|------|
| <b>Erythromycin</b> |                                  | <table border="1"> <thead> <tr> <th colspan="7">Average Response</th> </tr> <tr> <th>Dose</th> <th>Green Signal</th> <th>Actual Pct Green Cells</th> <th>Normalized Pct Green Cells</th> <th>Red Signal</th> <th>Actual Pct Red Cells</th> <th>Normalized Pct Red Cells</th> </tr> </thead> <tbody> <tr> <td>0.1 uM</td> <td>116.01</td> <td>0.94</td> <td>142.93</td> <td>99.39</td> <td>0.10</td> <td>-15.31</td> </tr> <tr> <td>1 uM</td> <td>100.39</td> <td>0.81</td> <td>24.76</td> <td>92.25</td> <td>0.07</td> <td>-26.19</td> </tr> <tr> <td>10 uM</td> <td>95.21</td> <td>0.76</td> <td>18.07</td> <td>120.76</td> <td>0.13</td> <td>0.23</td> </tr> </tbody> </table> | Average Response |                        |                            |            |                      |                          |  | Dose | Green Signal | Actual Pct Green Cells | Normalized Pct Green Cells | Red Signal | Actual Pct Red Cells | Normalized Pct Red Cells | 0.1 uM | 116.01 | 0.94 | 142.93 | 99.39 | 0.10 | -15.31 | 1 uM | 100.39 | 0.81 | 24.76 | 92.25 | 0.07 | -26.19 | 10 uM | 95.21 | 0.76 | 18.07 | 120.76 | 0.13 | 0.23 |
|                     |                                  | Average Response                                                                                                                                                                                                                                                                                                                                                                                                                                                                                                                                                                                                                                                                 |                  |                        |                            |            |                      |                          |  |      |              |                        |                            |            |                      |                          |        |        |      |        |       |      |        |      |        |      |       |       |      |        |       |       |      |       |        |      |      |
|                     |                                  | Dose                                                                                                                                                                                                                                                                                                                                                                                                                                                                                                                                                                                                                                                                             | Green Signal     | Actual Pct Green Cells | Normalized Pct Green Cells | Red Signal | Actual Pct Red Cells | Normalized Pct Red Cells |  |      |              |                        |                            |            |                      |                          |        |        |      |        |       |      |        |      |        |      |       |       |      |        |       |       |      |       |        |      |      |
|                     |                                  | 0.1 uM                                                                                                                                                                                                                                                                                                                                                                                                                                                                                                                                                                                                                                                                           | 116.01           | 0.94                   | 142.93                     | 99.39      | 0.10                 | -15.31                   |  |      |              |                        |                            |            |                      |                          |        |        |      |        |       |      |        |      |        |      |       |       |      |        |       |       |      |       |        |      |      |
| 1 uM                | 100.39                           | 0.81                                                                                                                                                                                                                                                                                                                                                                                                                                                                                                                                                                                                                                                                             | 24.76            | 92.25                  | 0.07                       | -26.19     |                      |                          |  |      |              |                        |                            |            |                      |                          |        |        |      |        |       |      |        |      |        |      |       |       |      |        |       |       |      |       |        |      |      |
| 10 uM               | 95.21                            | 0.76                                                                                                                                                                                                                                                                                                                                                                                                                                                                                                                                                                                                                                                                             | 18.07            | 120.76                 | 0.13                       | 0.23       |                      |                          |  |      |              |                        |                            |            |                      |                          |        |        |      |        |       |      |        |      |        |      |       |       |      |        |       |       |      |       |        |      |      |

| Compound                    | Normalized Values (A and B Sets) | Responses                                                                                                                                                                                                                                                                                                                                                                                                                                                                                                                                                                                                                                                                          |                  |                        |                            |            |                      |                          |  |      |              |                        |                            |            |                      |                          |        |       |      |         |       |      |        |      |       |      |        |       |      |        |       |       |      |        |       |      |        |
|-----------------------------|----------------------------------|------------------------------------------------------------------------------------------------------------------------------------------------------------------------------------------------------------------------------------------------------------------------------------------------------------------------------------------------------------------------------------------------------------------------------------------------------------------------------------------------------------------------------------------------------------------------------------------------------------------------------------------------------------------------------------|------------------|------------------------|----------------------------|------------|----------------------|--------------------------|--|------|--------------|------------------------|----------------------------|------------|----------------------|--------------------------|--------|-------|------|---------|-------|------|--------|------|-------|------|--------|-------|------|--------|-------|-------|------|--------|-------|------|--------|
| <b>Escitalopram Oxalate</b> |                                  | <table border="1"> <thead> <tr> <th colspan="7">Average Response</th> </tr> <tr> <th>Dose</th> <th>Green Signal</th> <th>Actual Pct Green Cells</th> <th>Normalized Pct Green Cells</th> <th>Red Signal</th> <th>Actual Pct Red Cells</th> <th>Normalized Pct Red Cells</th> </tr> </thead> <tbody> <tr> <td>0.1 uM</td> <td>86.30</td> <td>0.81</td> <td>-195.35</td> <td>74.44</td> <td>0.03</td> <td>-48.51</td> </tr> <tr> <td>1 uM</td> <td>85.26</td> <td>0.65</td> <td>-41.57</td> <td>70.28</td> <td>0.02</td> <td>-56.94</td> </tr> <tr> <td>10 uM</td> <td>84.33</td> <td>0.76</td> <td>-25.89</td> <td>94.00</td> <td>0.05</td> <td>-36.60</td> </tr> </tbody> </table> | Average Response |                        |                            |            |                      |                          |  | Dose | Green Signal | Actual Pct Green Cells | Normalized Pct Green Cells | Red Signal | Actual Pct Red Cells | Normalized Pct Red Cells | 0.1 uM | 86.30 | 0.81 | -195.35 | 74.44 | 0.03 | -48.51 | 1 uM | 85.26 | 0.65 | -41.57 | 70.28 | 0.02 | -56.94 | 10 uM | 84.33 | 0.76 | -25.89 | 94.00 | 0.05 | -36.60 |
|                             |                                  | Average Response                                                                                                                                                                                                                                                                                                                                                                                                                                                                                                                                                                                                                                                                   |                  |                        |                            |            |                      |                          |  |      |              |                        |                            |            |                      |                          |        |       |      |         |       |      |        |      |       |      |        |       |      |        |       |       |      |        |       |      |        |
|                             |                                  | Dose                                                                                                                                                                                                                                                                                                                                                                                                                                                                                                                                                                                                                                                                               | Green Signal     | Actual Pct Green Cells | Normalized Pct Green Cells | Red Signal | Actual Pct Red Cells | Normalized Pct Red Cells |  |      |              |                        |                            |            |                      |                          |        |       |      |         |       |      |        |      |       |      |        |       |      |        |       |       |      |        |       |      |        |
|                             |                                  | 0.1 uM                                                                                                                                                                                                                                                                                                                                                                                                                                                                                                                                                                                                                                                                             | 86.30            | 0.81                   | -195.35                    | 74.44      | 0.03                 | -48.51                   |  |      |              |                        |                            |            |                      |                          |        |       |      |         |       |      |        |      |       |      |        |       |      |        |       |       |      |        |       |      |        |
| 1 uM                        | 85.26                            | 0.65                                                                                                                                                                                                                                                                                                                                                                                                                                                                                                                                                                                                                                                                               | -41.57           | 70.28                  | 0.02                       | -56.94     |                      |                          |  |      |              |                        |                            |            |                      |                          |        |       |      |         |       |      |        |      |       |      |        |       |      |        |       |       |      |        |       |      |        |
| 10 uM                       | 84.33                            | 0.76                                                                                                                                                                                                                                                                                                                                                                                                                                                                                                                                                                                                                                                                               | -25.89           | 94.00                  | 0.05                       | -36.60     |                      |                          |  |      |              |                        |                            |            |                      |                          |        |       |      |         |       |      |        |      |       |      |        |       |      |        |       |       |      |        |       |      |        |

| Compound                      | Normalized Values (A and B Sets) | Responses                                                                                                                                                                                                                                                                                                                                                                                                                                                                                                                                                                                                                                                                            |                  |                        |                            |            |                      |                          |  |      |              |                        |                            |            |                      |                          |        |        |      |        |        |      |       |      |        |      |        |       |      |        |       |        |      |       |        |      |        |
|-------------------------------|----------------------------------|--------------------------------------------------------------------------------------------------------------------------------------------------------------------------------------------------------------------------------------------------------------------------------------------------------------------------------------------------------------------------------------------------------------------------------------------------------------------------------------------------------------------------------------------------------------------------------------------------------------------------------------------------------------------------------------|------------------|------------------------|----------------------------|------------|----------------------|--------------------------|--|------|--------------|------------------------|----------------------------|------------|----------------------|--------------------------|--------|--------|------|--------|--------|------|-------|------|--------|------|--------|-------|------|--------|-------|--------|------|-------|--------|------|--------|
| <b>Esomeprazole Magnesium</b> |                                  | <table border="1"> <thead> <tr> <th colspan="7">Average Response</th> </tr> <tr> <th>Dose</th> <th>Green Signal</th> <th>Actual Pct Green Cells</th> <th>Normalized Pct Green Cells</th> <th>Red Signal</th> <th>Actual Pct Red Cells</th> <th>Normalized Pct Red Cells</th> </tr> </thead> <tbody> <tr> <td>0.1 uM</td> <td>104.50</td> <td>0.92</td> <td>106.98</td> <td>125.54</td> <td>0.18</td> <td>15.78</td> </tr> <tr> <td>1 uM</td> <td>112.84</td> <td>0.94</td> <td>156.61</td> <td>90.32</td> <td>0.05</td> <td>-32.97</td> </tr> <tr> <td>10 uM</td> <td>102.85</td> <td>0.88</td> <td>99.53</td> <td>108.97</td> <td>0.08</td> <td>-16.98</td> </tr> </tbody> </table> | Average Response |                        |                            |            |                      |                          |  | Dose | Green Signal | Actual Pct Green Cells | Normalized Pct Green Cells | Red Signal | Actual Pct Red Cells | Normalized Pct Red Cells | 0.1 uM | 104.50 | 0.92 | 106.98 | 125.54 | 0.18 | 15.78 | 1 uM | 112.84 | 0.94 | 156.61 | 90.32 | 0.05 | -32.97 | 10 uM | 102.85 | 0.88 | 99.53 | 108.97 | 0.08 | -16.98 |
|                               |                                  | Average Response                                                                                                                                                                                                                                                                                                                                                                                                                                                                                                                                                                                                                                                                     |                  |                        |                            |            |                      |                          |  |      |              |                        |                            |            |                      |                          |        |        |      |        |        |      |       |      |        |      |        |       |      |        |       |        |      |       |        |      |        |
|                               |                                  | Dose                                                                                                                                                                                                                                                                                                                                                                                                                                                                                                                                                                                                                                                                                 | Green Signal     | Actual Pct Green Cells | Normalized Pct Green Cells | Red Signal | Actual Pct Red Cells | Normalized Pct Red Cells |  |      |              |                        |                            |            |                      |                          |        |        |      |        |        |      |       |      |        |      |        |       |      |        |       |        |      |       |        |      |        |
|                               |                                  | 0.1 uM                                                                                                                                                                                                                                                                                                                                                                                                                                                                                                                                                                                                                                                                               | 104.50           | 0.92                   | 106.98                     | 125.54     | 0.18                 | 15.78                    |  |      |              |                        |                            |            |                      |                          |        |        |      |        |        |      |       |      |        |      |        |       |      |        |       |        |      |       |        |      |        |
| 1 uM                          | 112.84                           | 0.94                                                                                                                                                                                                                                                                                                                                                                                                                                                                                                                                                                                                                                                                                 | 156.61           | 90.32                  | 0.05                       | -32.97     |                      |                          |  |      |              |                        |                            |            |                      |                          |        |        |      |        |        |      |       |      |        |      |        |       |      |        |       |        |      |       |        |      |        |
| 10 uM                         | 102.85                           | 0.88                                                                                                                                                                                                                                                                                                                                                                                                                                                                                                                                                                                                                                                                                 | 99.53            | 108.97                 | 0.08                       | -16.98     |                      |                          |  |      |              |                        |                            |            |                      |                          |        |        |      |        |        |      |       |      |        |      |        |       |      |        |       |        |      |       |        |      |        |

| Compound                   | Normalized Values (A and B Sets) | Responses                                                                                                                                                                                                                                                                                                                                                                                                                                                                                                                                                                                                                                                                         |                  |                        |                            |            |                      |                          |  |      |              |                        |                            |            |                      |                          |        |       |      |       |       |      |        |      |        |      |       |       |      |        |       |       |      |         |       |      |        |
|----------------------------|----------------------------------|-----------------------------------------------------------------------------------------------------------------------------------------------------------------------------------------------------------------------------------------------------------------------------------------------------------------------------------------------------------------------------------------------------------------------------------------------------------------------------------------------------------------------------------------------------------------------------------------------------------------------------------------------------------------------------------|------------------|------------------------|----------------------------|------------|----------------------|--------------------------|--|------|--------------|------------------------|----------------------------|------------|----------------------|--------------------------|--------|-------|------|-------|-------|------|--------|------|--------|------|-------|-------|------|--------|-------|-------|------|---------|-------|------|--------|
| <b>Esomeprazole Sodium</b> |                                  | <table border="1"> <thead> <tr> <th colspan="7">Average Response</th> </tr> <tr> <th>Dose</th> <th>Green Signal</th> <th>Actual Pct Green Cells</th> <th>Normalized Pct Green Cells</th> <th>Red Signal</th> <th>Actual Pct Red Cells</th> <th>Normalized Pct Red Cells</th> </tr> </thead> <tbody> <tr> <td>0.1 uM</td> <td>95.37</td> <td>0.89</td> <td>95.09</td> <td>86.26</td> <td>0.06</td> <td>-22.69</td> </tr> <tr> <td>1 uM</td> <td>104.89</td> <td>0.88</td> <td>97.36</td> <td>84.84</td> <td>0.03</td> <td>-40.22</td> </tr> <tr> <td>10 uM</td> <td>89.55</td> <td>0.83</td> <td>-510.53</td> <td>75.72</td> <td>0.02</td> <td>-50.28</td> </tr> </tbody> </table> | Average Response |                        |                            |            |                      |                          |  | Dose | Green Signal | Actual Pct Green Cells | Normalized Pct Green Cells | Red Signal | Actual Pct Red Cells | Normalized Pct Red Cells | 0.1 uM | 95.37 | 0.89 | 95.09 | 86.26 | 0.06 | -22.69 | 1 uM | 104.89 | 0.88 | 97.36 | 84.84 | 0.03 | -40.22 | 10 uM | 89.55 | 0.83 | -510.53 | 75.72 | 0.02 | -50.28 |
|                            |                                  | Average Response                                                                                                                                                                                                                                                                                                                                                                                                                                                                                                                                                                                                                                                                  |                  |                        |                            |            |                      |                          |  |      |              |                        |                            |            |                      |                          |        |       |      |       |       |      |        |      |        |      |       |       |      |        |       |       |      |         |       |      |        |
|                            |                                  | Dose                                                                                                                                                                                                                                                                                                                                                                                                                                                                                                                                                                                                                                                                              | Green Signal     | Actual Pct Green Cells | Normalized Pct Green Cells | Red Signal | Actual Pct Red Cells | Normalized Pct Red Cells |  |      |              |                        |                            |            |                      |                          |        |       |      |       |       |      |        |      |        |      |       |       |      |        |       |       |      |         |       |      |        |
|                            |                                  | 0.1 uM                                                                                                                                                                                                                                                                                                                                                                                                                                                                                                                                                                                                                                                                            | 95.37            | 0.89                   | 95.09                      | 86.26      | 0.06                 | -22.69                   |  |      |              |                        |                            |            |                      |                          |        |       |      |       |       |      |        |      |        |      |       |       |      |        |       |       |      |         |       |      |        |
| 1 uM                       | 104.89                           | 0.88                                                                                                                                                                                                                                                                                                                                                                                                                                                                                                                                                                                                                                                                              | 97.36            | 84.84                  | 0.03                       | -40.22     |                      |                          |  |      |              |                        |                            |            |                      |                          |        |       |      |       |       |      |        |      |        |      |       |       |      |        |       |       |      |         |       |      |        |
| 10 uM                      | 89.55                            | 0.83                                                                                                                                                                                                                                                                                                                                                                                                                                                                                                                                                                                                                                                                              | -510.53          | 75.72                  | 0.02                       | -50.28     |                      |                          |  |      |              |                        |                            |            |                      |                          |        |       |      |       |       |      |        |      |        |      |       |       |      |        |       |       |      |         |       |      |        |

| Compound                  | Normalized Values (A and B Sets) | Responses                                                                                                                                                                                                                                                                                                                                                                                                                                                                                                                                                                                                                                                                       |                  |                        |                            |            |                      |                          |  |      |              |                        |                            |            |                      |                          |        |       |      |       |       |      |        |      |       |      |       |       |      |        |       |        |      |       |       |      |        |
|---------------------------|----------------------------------|---------------------------------------------------------------------------------------------------------------------------------------------------------------------------------------------------------------------------------------------------------------------------------------------------------------------------------------------------------------------------------------------------------------------------------------------------------------------------------------------------------------------------------------------------------------------------------------------------------------------------------------------------------------------------------|------------------|------------------------|----------------------------|------------|----------------------|--------------------------|--|------|--------------|------------------------|----------------------------|------------|----------------------|--------------------------|--------|-------|------|-------|-------|------|--------|------|-------|------|-------|-------|------|--------|-------|--------|------|-------|-------|------|--------|
| <b>Estradiol Benzoate</b> |                                  | <table border="1"> <thead> <tr> <th colspan="7">Average Response</th> </tr> <tr> <th>Dose</th> <th>Green Signal</th> <th>Actual Pct Green Cells</th> <th>Normalized Pct Green Cells</th> <th>Red Signal</th> <th>Actual Pct Red Cells</th> <th>Normalized Pct Red Cells</th> </tr> </thead> <tbody> <tr> <td>0.1 uM</td> <td>98.85</td> <td>0.91</td> <td>86.34</td> <td>98.10</td> <td>0.10</td> <td>-14.53</td> </tr> <tr> <td>1 uM</td> <td>99.44</td> <td>0.78</td> <td>44.84</td> <td>84.61</td> <td>0.07</td> <td>-33.74</td> </tr> <tr> <td>10 uM</td> <td>103.74</td> <td>0.87</td> <td>59.30</td> <td>99.06</td> <td>0.09</td> <td>-17.33</td> </tr> </tbody> </table> | Average Response |                        |                            |            |                      |                          |  | Dose | Green Signal | Actual Pct Green Cells | Normalized Pct Green Cells | Red Signal | Actual Pct Red Cells | Normalized Pct Red Cells | 0.1 uM | 98.85 | 0.91 | 86.34 | 98.10 | 0.10 | -14.53 | 1 uM | 99.44 | 0.78 | 44.84 | 84.61 | 0.07 | -33.74 | 10 uM | 103.74 | 0.87 | 59.30 | 99.06 | 0.09 | -17.33 |
|                           |                                  | Average Response                                                                                                                                                                                                                                                                                                                                                                                                                                                                                                                                                                                                                                                                |                  |                        |                            |            |                      |                          |  |      |              |                        |                            |            |                      |                          |        |       |      |       |       |      |        |      |       |      |       |       |      |        |       |        |      |       |       |      |        |
|                           |                                  | Dose                                                                                                                                                                                                                                                                                                                                                                                                                                                                                                                                                                                                                                                                            | Green Signal     | Actual Pct Green Cells | Normalized Pct Green Cells | Red Signal | Actual Pct Red Cells | Normalized Pct Red Cells |  |      |              |                        |                            |            |                      |                          |        |       |      |       |       |      |        |      |       |      |       |       |      |        |       |        |      |       |       |      |        |
|                           |                                  | 0.1 uM                                                                                                                                                                                                                                                                                                                                                                                                                                                                                                                                                                                                                                                                          | 98.85            | 0.91                   | 86.34                      | 98.10      | 0.10                 | -14.53                   |  |      |              |                        |                            |            |                      |                          |        |       |      |       |       |      |        |      |       |      |       |       |      |        |       |        |      |       |       |      |        |
| 1 uM                      | 99.44                            | 0.78                                                                                                                                                                                                                                                                                                                                                                                                                                                                                                                                                                                                                                                                            | 44.84            | 84.61                  | 0.07                       | -33.74     |                      |                          |  |      |              |                        |                            |            |                      |                          |        |       |      |       |       |      |        |      |       |      |       |       |      |        |       |        |      |       |       |      |        |
| 10 uM                     | 103.74                           | 0.87                                                                                                                                                                                                                                                                                                                                                                                                                                                                                                                                                                                                                                                                            | 59.30            | 99.06                  | 0.09                       | -17.33     |                      |                          |  |      |              |                        |                            |            |                      |                          |        |       |      |       |       |      |        |      |       |      |       |       |      |        |       |        |      |       |       |      |        |

| Compound                   | Normalized Values (A and B Sets) | Responses                                                                                                                                                                                                                                                                                                                                                                                                                                                                                                                                                                                                                                                                      |                  |                        |                            |            |                      |                          |  |      |              |                        |                            |            |                      |                          |        |       |      |        |       |      |        |      |       |      |       |       |      |        |       |       |      |      |       |      |        |
|----------------------------|----------------------------------|--------------------------------------------------------------------------------------------------------------------------------------------------------------------------------------------------------------------------------------------------------------------------------------------------------------------------------------------------------------------------------------------------------------------------------------------------------------------------------------------------------------------------------------------------------------------------------------------------------------------------------------------------------------------------------|------------------|------------------------|----------------------------|------------|----------------------|--------------------------|--|------|--------------|------------------------|----------------------------|------------|----------------------|--------------------------|--------|-------|------|--------|-------|------|--------|------|-------|------|-------|-------|------|--------|-------|-------|------|------|-------|------|--------|
| <b>Estradiol Cypionate</b> |                                  | <table border="1"> <thead> <tr> <th colspan="7">Average Response</th> </tr> <tr> <th>Dose</th> <th>Green Signal</th> <th>Actual Pct Green Cells</th> <th>Normalized Pct Green Cells</th> <th>Red Signal</th> <th>Actual Pct Red Cells</th> <th>Normalized Pct Red Cells</th> </tr> </thead> <tbody> <tr> <td>0.1 uM</td> <td>95.75</td> <td>0.88</td> <td>225.59</td> <td>59.95</td> <td>0.01</td> <td>-57.29</td> </tr> <tr> <td>1 uM</td> <td>94.18</td> <td>0.84</td> <td>89.93</td> <td>81.06</td> <td>0.06</td> <td>-35.89</td> </tr> <tr> <td>10 uM</td> <td>93.88</td> <td>0.80</td> <td>5.28</td> <td>67.09</td> <td>0.01</td> <td>-60.10</td> </tr> </tbody> </table> | Average Response |                        |                            |            |                      |                          |  | Dose | Green Signal | Actual Pct Green Cells | Normalized Pct Green Cells | Red Signal | Actual Pct Red Cells | Normalized Pct Red Cells | 0.1 uM | 95.75 | 0.88 | 225.59 | 59.95 | 0.01 | -57.29 | 1 uM | 94.18 | 0.84 | 89.93 | 81.06 | 0.06 | -35.89 | 10 uM | 93.88 | 0.80 | 5.28 | 67.09 | 0.01 | -60.10 |
|                            |                                  | Average Response                                                                                                                                                                                                                                                                                                                                                                                                                                                                                                                                                                                                                                                               |                  |                        |                            |            |                      |                          |  |      |              |                        |                            |            |                      |                          |        |       |      |        |       |      |        |      |       |      |       |       |      |        |       |       |      |      |       |      |        |
|                            |                                  | Dose                                                                                                                                                                                                                                                                                                                                                                                                                                                                                                                                                                                                                                                                           | Green Signal     | Actual Pct Green Cells | Normalized Pct Green Cells | Red Signal | Actual Pct Red Cells | Normalized Pct Red Cells |  |      |              |                        |                            |            |                      |                          |        |       |      |        |       |      |        |      |       |      |       |       |      |        |       |       |      |      |       |      |        |
|                            |                                  | 0.1 uM                                                                                                                                                                                                                                                                                                                                                                                                                                                                                                                                                                                                                                                                         | 95.75            | 0.88                   | 225.59                     | 59.95      | 0.01                 | -57.29                   |  |      |              |                        |                            |            |                      |                          |        |       |      |        |       |      |        |      |       |      |       |       |      |        |       |       |      |      |       |      |        |
| 1 uM                       | 94.18                            | 0.84                                                                                                                                                                                                                                                                                                                                                                                                                                                                                                                                                                                                                                                                           | 89.93            | 81.06                  | 0.06                       | -35.89     |                      |                          |  |      |              |                        |                            |            |                      |                          |        |       |      |        |       |      |        |      |       |      |       |       |      |        |       |       |      |      |       |      |        |
| 10 uM                      | 93.88                            | 0.80                                                                                                                                                                                                                                                                                                                                                                                                                                                                                                                                                                                                                                                                           | 5.28             | 67.09                  | 0.01                       | -60.10     |                      |                          |  |      |              |                        |                            |            |                      |                          |        |       |      |        |       |      |        |      |       |      |       |       |      |        |       |       |      |      |       |      |        |

| Compound                               | Normalized Values (A and B Sets) | Responses                                                                                                                                                                                                                                                                                                                                                                                                                                                                                                                                                                                                                                                                         |                  |                        |                            |            |                      |                          |  |      |              |                        |                            |            |                      |                          |        |       |      |        |       |      |        |      |        |      |        |        |      |      |       |       |      |        |        |      |       |
|----------------------------------------|----------------------------------|-----------------------------------------------------------------------------------------------------------------------------------------------------------------------------------------------------------------------------------------------------------------------------------------------------------------------------------------------------------------------------------------------------------------------------------------------------------------------------------------------------------------------------------------------------------------------------------------------------------------------------------------------------------------------------------|------------------|------------------------|----------------------------|------------|----------------------|--------------------------|--|------|--------------|------------------------|----------------------------|------------|----------------------|--------------------------|--------|-------|------|--------|-------|------|--------|------|--------|------|--------|--------|------|------|-------|-------|------|--------|--------|------|-------|
| <b>Ethacridine lactate monohydrate</b> |                                  | <table border="1"> <thead> <tr> <th colspan="7">Average Response</th> </tr> <tr> <th>Dose</th> <th>Green Signal</th> <th>Actual Pct Green Cells</th> <th>Normalized Pct Green Cells</th> <th>Red Signal</th> <th>Actual Pct Red Cells</th> <th>Normalized Pct Red Cells</th> </tr> </thead> <tbody> <tr> <td>0.1 uM</td> <td>97.26</td> <td>0.90</td> <td>121.86</td> <td>84.35</td> <td>0.06</td> <td>-31.51</td> </tr> <tr> <td>1 uM</td> <td>108.02</td> <td>0.90</td> <td>129.00</td> <td>105.12</td> <td>0.14</td> <td>2.41</td> </tr> <tr> <td>10 uM</td> <td>84.96</td> <td>0.63</td> <td>-83.51</td> <td>115.49</td> <td>0.18</td> <td>32.91</td> </tr> </tbody> </table> | Average Response |                        |                            |            |                      |                          |  | Dose | Green Signal | Actual Pct Green Cells | Normalized Pct Green Cells | Red Signal | Actual Pct Red Cells | Normalized Pct Red Cells | 0.1 uM | 97.26 | 0.90 | 121.86 | 84.35 | 0.06 | -31.51 | 1 uM | 108.02 | 0.90 | 129.00 | 105.12 | 0.14 | 2.41 | 10 uM | 84.96 | 0.63 | -83.51 | 115.49 | 0.18 | 32.91 |
|                                        |                                  | Average Response                                                                                                                                                                                                                                                                                                                                                                                                                                                                                                                                                                                                                                                                  |                  |                        |                            |            |                      |                          |  |      |              |                        |                            |            |                      |                          |        |       |      |        |       |      |        |      |        |      |        |        |      |      |       |       |      |        |        |      |       |
|                                        |                                  | Dose                                                                                                                                                                                                                                                                                                                                                                                                                                                                                                                                                                                                                                                                              | Green Signal     | Actual Pct Green Cells | Normalized Pct Green Cells | Red Signal | Actual Pct Red Cells | Normalized Pct Red Cells |  |      |              |                        |                            |            |                      |                          |        |       |      |        |       |      |        |      |        |      |        |        |      |      |       |       |      |        |        |      |       |
|                                        |                                  | 0.1 uM                                                                                                                                                                                                                                                                                                                                                                                                                                                                                                                                                                                                                                                                            | 97.26            | 0.90                   | 121.86                     | 84.35      | 0.06                 | -31.51                   |  |      |              |                        |                            |            |                      |                          |        |       |      |        |       |      |        |      |        |      |        |        |      |      |       |       |      |        |        |      |       |
| 1 uM                                   | 108.02                           | 0.90                                                                                                                                                                                                                                                                                                                                                                                                                                                                                                                                                                                                                                                                              | 129.00           | 105.12                 | 0.14                       | 2.41       |                      |                          |  |      |              |                        |                            |            |                      |                          |        |       |      |        |       |      |        |      |        |      |        |        |      |      |       |       |      |        |        |      |       |
| 10 uM                                  | 84.96                            | 0.63                                                                                                                                                                                                                                                                                                                                                                                                                                                                                                                                                                                                                                                                              | -83.51           | 115.49                 | 0.18                       | 32.91      |                      |                          |  |      |              |                        |                            |            |                      |                          |        |       |      |        |       |      |        |      |        |      |        |        |      |      |       |       |      |        |        |      |       |

| Compound        | Normalized Values (A and B Sets) | Responses                                                                                                                                                                                                                                                                                                                                                                                                                                                                                                                                                                                                                                                                         |                  |                        |                            |            |                      |                          |  |      |              |                        |                            |            |                      |                          |        |       |      |       |       |      |        |      |       |      |        |       |      |        |       |        |      |       |        |      |        |
|-----------------|----------------------------------|-----------------------------------------------------------------------------------------------------------------------------------------------------------------------------------------------------------------------------------------------------------------------------------------------------------------------------------------------------------------------------------------------------------------------------------------------------------------------------------------------------------------------------------------------------------------------------------------------------------------------------------------------------------------------------------|------------------|------------------------|----------------------------|------------|----------------------|--------------------------|--|------|--------------|------------------------|----------------------------|------------|----------------------|--------------------------|--------|-------|------|-------|-------|------|--------|------|-------|------|--------|-------|------|--------|-------|--------|------|-------|--------|------|--------|
| <b>Etodolac</b> |                                  | <table border="1"> <thead> <tr> <th colspan="7">Average Response</th> </tr> <tr> <th>Dose</th> <th>Green Signal</th> <th>Actual Pct Green Cells</th> <th>Normalized Pct Green Cells</th> <th>Red Signal</th> <th>Actual Pct Red Cells</th> <th>Normalized Pct Red Cells</th> </tr> </thead> <tbody> <tr> <td>0.1 uM</td> <td>95.24</td> <td>0.87</td> <td>93.52</td> <td>87.68</td> <td>0.05</td> <td>-47.30</td> </tr> <tr> <td>1 uM</td> <td>94.66</td> <td>0.80</td> <td>-13.80</td> <td>91.57</td> <td>0.07</td> <td>-27.00</td> </tr> <tr> <td>10 uM</td> <td>100.63</td> <td>0.82</td> <td>57.83</td> <td>103.75</td> <td>0.07</td> <td>-24.28</td> </tr> </tbody> </table> | Average Response |                        |                            |            |                      |                          |  | Dose | Green Signal | Actual Pct Green Cells | Normalized Pct Green Cells | Red Signal | Actual Pct Red Cells | Normalized Pct Red Cells | 0.1 uM | 95.24 | 0.87 | 93.52 | 87.68 | 0.05 | -47.30 | 1 uM | 94.66 | 0.80 | -13.80 | 91.57 | 0.07 | -27.00 | 10 uM | 100.63 | 0.82 | 57.83 | 103.75 | 0.07 | -24.28 |
|                 |                                  | Average Response                                                                                                                                                                                                                                                                                                                                                                                                                                                                                                                                                                                                                                                                  |                  |                        |                            |            |                      |                          |  |      |              |                        |                            |            |                      |                          |        |       |      |       |       |      |        |      |       |      |        |       |      |        |       |        |      |       |        |      |        |
|                 |                                  | Dose                                                                                                                                                                                                                                                                                                                                                                                                                                                                                                                                                                                                                                                                              | Green Signal     | Actual Pct Green Cells | Normalized Pct Green Cells | Red Signal | Actual Pct Red Cells | Normalized Pct Red Cells |  |      |              |                        |                            |            |                      |                          |        |       |      |       |       |      |        |      |       |      |        |       |      |        |       |        |      |       |        |      |        |
|                 |                                  | 0.1 uM                                                                                                                                                                                                                                                                                                                                                                                                                                                                                                                                                                                                                                                                            | 95.24            | 0.87                   | 93.52                      | 87.68      | 0.05                 | -47.30                   |  |      |              |                        |                            |            |                      |                          |        |       |      |       |       |      |        |      |       |      |        |       |      |        |       |        |      |       |        |      |        |
| 1 uM            | 94.66                            | 0.80                                                                                                                                                                                                                                                                                                                                                                                                                                                                                                                                                                                                                                                                              | -13.80           | 91.57                  | 0.07                       | -27.00     |                      |                          |  |      |              |                        |                            |            |                      |                          |        |       |      |       |       |      |        |      |       |      |        |       |      |        |       |        |      |       |        |      |        |
| 10 uM           | 100.63                           | 0.82                                                                                                                                                                                                                                                                                                                                                                                                                                                                                                                                                                                                                                                                              | 57.83            | 103.75                 | 0.07                       | -24.28     |                      |                          |  |      |              |                        |                            |            |                      |                          |        |       |      |       |       |      |        |      |       |      |        |       |      |        |       |        |      |       |        |      |        |

| Compound          | Normalized Values (A and B Sets) | Responses                                                                                                                                                                                                                                                                                                                                                                                                                                                                                                                                                                                                                                                                       |                  |                        |                            |            |                      |                          |  |      |              |                        |                            |            |                      |                          |        |       |      |        |       |      |        |      |       |      |       |       |      |        |       |       |      |       |       |      |        |
|-------------------|----------------------------------|---------------------------------------------------------------------------------------------------------------------------------------------------------------------------------------------------------------------------------------------------------------------------------------------------------------------------------------------------------------------------------------------------------------------------------------------------------------------------------------------------------------------------------------------------------------------------------------------------------------------------------------------------------------------------------|------------------|------------------------|----------------------------|------------|----------------------|--------------------------|--|------|--------------|------------------------|----------------------------|------------|----------------------|--------------------------|--------|-------|------|--------|-------|------|--------|------|-------|------|-------|-------|------|--------|-------|-------|------|-------|-------|------|--------|
| <b>Etofibrate</b> |                                  | <table border="1"> <thead> <tr> <th colspan="7">Average Response</th> </tr> <tr> <th>Dose</th> <th>Green Signal</th> <th>Actual Pct Green Cells</th> <th>Normalized Pct Green Cells</th> <th>Red Signal</th> <th>Actual Pct Red Cells</th> <th>Normalized Pct Red Cells</th> </tr> </thead> <tbody> <tr> <td>0.1 uM</td> <td>97.68</td> <td>0.90</td> <td>167.52</td> <td>92.38</td> <td>0.06</td> <td>-31.13</td> </tr> <tr> <td>1 uM</td> <td>94.81</td> <td>0.76</td> <td>30.00</td> <td>96.49</td> <td>0.10</td> <td>-18.25</td> </tr> <tr> <td>10 uM</td> <td>97.09</td> <td>0.83</td> <td>35.39</td> <td>87.65</td> <td>0.07</td> <td>-24.59</td> </tr> </tbody> </table> | Average Response |                        |                            |            |                      |                          |  | Dose | Green Signal | Actual Pct Green Cells | Normalized Pct Green Cells | Red Signal | Actual Pct Red Cells | Normalized Pct Red Cells | 0.1 uM | 97.68 | 0.90 | 167.52 | 92.38 | 0.06 | -31.13 | 1 uM | 94.81 | 0.76 | 30.00 | 96.49 | 0.10 | -18.25 | 10 uM | 97.09 | 0.83 | 35.39 | 87.65 | 0.07 | -24.59 |
|                   |                                  | Average Response                                                                                                                                                                                                                                                                                                                                                                                                                                                                                                                                                                                                                                                                |                  |                        |                            |            |                      |                          |  |      |              |                        |                            |            |                      |                          |        |       |      |        |       |      |        |      |       |      |       |       |      |        |       |       |      |       |       |      |        |
|                   |                                  | Dose                                                                                                                                                                                                                                                                                                                                                                                                                                                                                                                                                                                                                                                                            | Green Signal     | Actual Pct Green Cells | Normalized Pct Green Cells | Red Signal | Actual Pct Red Cells | Normalized Pct Red Cells |  |      |              |                        |                            |            |                      |                          |        |       |      |        |       |      |        |      |       |      |       |       |      |        |       |       |      |       |       |      |        |
|                   |                                  | 0.1 uM                                                                                                                                                                                                                                                                                                                                                                                                                                                                                                                                                                                                                                                                          | 97.68            | 0.90                   | 167.52                     | 92.38      | 0.06                 | -31.13                   |  |      |              |                        |                            |            |                      |                          |        |       |      |        |       |      |        |      |       |      |       |       |      |        |       |       |      |       |       |      |        |
| 1 uM              | 94.81                            | 0.76                                                                                                                                                                                                                                                                                                                                                                                                                                                                                                                                                                                                                                                                            | 30.00            | 96.49                  | 0.10                       | -18.25     |                      |                          |  |      |              |                        |                            |            |                      |                          |        |       |      |        |       |      |        |      |       |      |       |       |      |        |       |       |      |       |       |      |        |
| 10 uM             | 97.09                            | 0.83                                                                                                                                                                                                                                                                                                                                                                                                                                                                                                                                                                                                                                                                            | 35.39            | 87.65                  | 0.07                       | -24.59     |                      |                          |  |      |              |                        |                            |            |                      |                          |        |       |      |        |       |      |        |      |       |      |       |       |      |        |       |       |      |       |       |      |        |

| Compound         | Normalized Values (A and B Sets) | Responses                                                                                                                                                                                                                                                                                                                                                                                                                                                                                                                                                                                                                                                                           |                  |                        |                            |            |                      |                          |  |      |              |                        |                            |            |                      |                          |        |        |      |        |       |      |        |      |       |      |        |       |      |        |       |        |      |        |       |      |        |
|------------------|----------------------------------|-------------------------------------------------------------------------------------------------------------------------------------------------------------------------------------------------------------------------------------------------------------------------------------------------------------------------------------------------------------------------------------------------------------------------------------------------------------------------------------------------------------------------------------------------------------------------------------------------------------------------------------------------------------------------------------|------------------|------------------------|----------------------------|------------|----------------------|--------------------------|--|------|--------------|------------------------|----------------------------|------------|----------------------|--------------------------|--------|--------|------|--------|-------|------|--------|------|-------|------|--------|-------|------|--------|-------|--------|------|--------|-------|------|--------|
| <b>ETP-46464</b> |                                  | <table border="1"> <thead> <tr> <th colspan="7">Average Response</th> </tr> <tr> <th>Dose</th> <th>Green Signal</th> <th>Actual Pct Green Cells</th> <th>Normalized Pct Green Cells</th> <th>Red Signal</th> <th>Actual Pct Red Cells</th> <th>Normalized Pct Red Cells</th> </tr> </thead> <tbody> <tr> <td>0.1 uM</td> <td>113.47</td> <td>0.95</td> <td>155.25</td> <td>73.07</td> <td>0.02</td> <td>-63.47</td> </tr> <tr> <td>1 uM</td> <td>95.37</td> <td>0.89</td> <td>104.57</td> <td>80.50</td> <td>0.05</td> <td>-16.16</td> </tr> <tr> <td>10 uM</td> <td>101.20</td> <td>0.94</td> <td>118.37</td> <td>78.94</td> <td>0.04</td> <td>-34.82</td> </tr> </tbody> </table> | Average Response |                        |                            |            |                      |                          |  | Dose | Green Signal | Actual Pct Green Cells | Normalized Pct Green Cells | Red Signal | Actual Pct Red Cells | Normalized Pct Red Cells | 0.1 uM | 113.47 | 0.95 | 155.25 | 73.07 | 0.02 | -63.47 | 1 uM | 95.37 | 0.89 | 104.57 | 80.50 | 0.05 | -16.16 | 10 uM | 101.20 | 0.94 | 118.37 | 78.94 | 0.04 | -34.82 |
|                  |                                  | Average Response                                                                                                                                                                                                                                                                                                                                                                                                                                                                                                                                                                                                                                                                    |                  |                        |                            |            |                      |                          |  |      |              |                        |                            |            |                      |                          |        |        |      |        |       |      |        |      |       |      |        |       |      |        |       |        |      |        |       |      |        |
|                  |                                  | Dose                                                                                                                                                                                                                                                                                                                                                                                                                                                                                                                                                                                                                                                                                | Green Signal     | Actual Pct Green Cells | Normalized Pct Green Cells | Red Signal | Actual Pct Red Cells | Normalized Pct Red Cells |  |      |              |                        |                            |            |                      |                          |        |        |      |        |       |      |        |      |       |      |        |       |      |        |       |        |      |        |       |      |        |
|                  |                                  | 0.1 uM                                                                                                                                                                                                                                                                                                                                                                                                                                                                                                                                                                                                                                                                              | 113.47           | 0.95                   | 155.25                     | 73.07      | 0.02                 | -63.47                   |  |      |              |                        |                            |            |                      |                          |        |        |      |        |       |      |        |      |       |      |        |       |      |        |       |        |      |        |       |      |        |
| 1 uM             | 95.37                            | 0.89                                                                                                                                                                                                                                                                                                                                                                                                                                                                                                                                                                                                                                                                                | 104.57           | 80.50                  | 0.05                       | -16.16     |                      |                          |  |      |              |                        |                            |            |                      |                          |        |        |      |        |       |      |        |      |       |      |        |       |      |        |       |        |      |        |       |      |        |
| 10 uM            | 101.20                           | 0.94                                                                                                                                                                                                                                                                                                                                                                                                                                                                                                                                                                                                                                                                                | 118.37           | 78.94                  | 0.04                       | -34.82     |                      |                          |  |      |              |                        |                            |            |                      |                          |        |        |      |        |       |      |        |      |       |      |        |       |      |        |       |        |      |        |       |      |        |

| Compound                   | Normalized Values (A and B Sets) | Responses                                                                                                                                                                                                                                                                                                                                                                                                                                                                                                                                                                                                                                                                       |                  |                        |                            |            |                      |                          |  |      |              |                        |                            |            |                      |                          |        |       |      |       |       |      |        |      |       |      |       |       |      |        |       |       |      |        |       |      |        |
|----------------------------|----------------------------------|---------------------------------------------------------------------------------------------------------------------------------------------------------------------------------------------------------------------------------------------------------------------------------------------------------------------------------------------------------------------------------------------------------------------------------------------------------------------------------------------------------------------------------------------------------------------------------------------------------------------------------------------------------------------------------|------------------|------------------------|----------------------------|------------|----------------------|--------------------------|--|------|--------------|------------------------|----------------------------|------------|----------------------|--------------------------|--------|-------|------|-------|-------|------|--------|------|-------|------|-------|-------|------|--------|-------|-------|------|--------|-------|------|--------|
| <b>Etravirine (TMC125)</b> |                                  | <table border="1"> <thead> <tr> <th colspan="7">Average Response</th> </tr> <tr> <th>Dose</th> <th>Green Signal</th> <th>Actual Pct Green Cells</th> <th>Normalized Pct Green Cells</th> <th>Red Signal</th> <th>Actual Pct Red Cells</th> <th>Normalized Pct Red Cells</th> </tr> </thead> <tbody> <tr> <td>0.1 uM</td> <td>94.86</td> <td>0.84</td> <td>63.18</td> <td>87.72</td> <td>0.05</td> <td>-41.85</td> </tr> <tr> <td>1 uM</td> <td>93.16</td> <td>0.83</td> <td>24.50</td> <td>81.70</td> <td>0.04</td> <td>-31.84</td> </tr> <tr> <td>10 uM</td> <td>77.45</td> <td>0.69</td> <td>110.87</td> <td>80.61</td> <td>0.07</td> <td>-21.26</td> </tr> </tbody> </table> | Average Response |                        |                            |            |                      |                          |  | Dose | Green Signal | Actual Pct Green Cells | Normalized Pct Green Cells | Red Signal | Actual Pct Red Cells | Normalized Pct Red Cells | 0.1 uM | 94.86 | 0.84 | 63.18 | 87.72 | 0.05 | -41.85 | 1 uM | 93.16 | 0.83 | 24.50 | 81.70 | 0.04 | -31.84 | 10 uM | 77.45 | 0.69 | 110.87 | 80.61 | 0.07 | -21.26 |
|                            |                                  | Average Response                                                                                                                                                                                                                                                                                                                                                                                                                                                                                                                                                                                                                                                                |                  |                        |                            |            |                      |                          |  |      |              |                        |                            |            |                      |                          |        |       |      |       |       |      |        |      |       |      |       |       |      |        |       |       |      |        |       |      |        |
|                            |                                  | Dose                                                                                                                                                                                                                                                                                                                                                                                                                                                                                                                                                                                                                                                                            | Green Signal     | Actual Pct Green Cells | Normalized Pct Green Cells | Red Signal | Actual Pct Red Cells | Normalized Pct Red Cells |  |      |              |                        |                            |            |                      |                          |        |       |      |       |       |      |        |      |       |      |       |       |      |        |       |       |      |        |       |      |        |
|                            |                                  | 0.1 uM                                                                                                                                                                                                                                                                                                                                                                                                                                                                                                                                                                                                                                                                          | 94.86            | 0.84                   | 63.18                      | 87.72      | 0.05                 | -41.85                   |  |      |              |                        |                            |            |                      |                          |        |       |      |       |       |      |        |      |       |      |       |       |      |        |       |       |      |        |       |      |        |
| 1 uM                       | 93.16                            | 0.83                                                                                                                                                                                                                                                                                                                                                                                                                                                                                                                                                                                                                                                                            | 24.50            | 81.70                  | 0.04                       | -31.84     |                      |                          |  |      |              |                        |                            |            |                      |                          |        |       |      |       |       |      |        |      |       |      |       |       |      |        |       |       |      |        |       |      |        |
| 10 uM                      | 77.45                            | 0.69                                                                                                                                                                                                                                                                                                                                                                                                                                                                                                                                                                                                                                                                            | 110.87           | 80.61                  | 0.07                       | -21.26     |                      |                          |  |      |              |                        |                            |            |                      |                          |        |       |      |       |       |      |        |      |       |      |       |       |      |        |       |       |      |        |       |      |        |

| Compound       | Normalized Values (A and B Sets) | Responses                                                                                                                                                                                                                                                                                                                                                                                                                                                                                                                                                                                                                                                                        |                  |                        |                            |            |                      |                          |  |      |              |                        |                            |            |                      |                          |        |       |      |        |       |      |       |      |       |      |       |        |      |       |       |        |      |        |        |      |       |
|----------------|----------------------------------|----------------------------------------------------------------------------------------------------------------------------------------------------------------------------------------------------------------------------------------------------------------------------------------------------------------------------------------------------------------------------------------------------------------------------------------------------------------------------------------------------------------------------------------------------------------------------------------------------------------------------------------------------------------------------------|------------------|------------------------|----------------------------|------------|----------------------|--------------------------|--|------|--------------|------------------------|----------------------------|------------|----------------------|--------------------------|--------|-------|------|--------|-------|------|-------|------|-------|------|-------|--------|------|-------|-------|--------|------|--------|--------|------|-------|
| <b>EUK 134</b> |                                  | <table border="1"> <thead> <tr> <th colspan="7">Average Response</th> </tr> <tr> <th>Dose</th> <th>Green Signal</th> <th>Actual Pct Green Cells</th> <th>Normalized Pct Green Cells</th> <th>Red Signal</th> <th>Actual Pct Red Cells</th> <th>Normalized Pct Red Cells</th> </tr> </thead> <tbody> <tr> <td>0.1 uM</td> <td>99.09</td> <td>0.90</td> <td>162.30</td> <td>99.16</td> <td>0.11</td> <td>-9.57</td> </tr> <tr> <td>1 uM</td> <td>97.85</td> <td>0.80</td> <td>59.77</td> <td>102.60</td> <td>0.13</td> <td>-1.95</td> </tr> <tr> <td>10 uM</td> <td>105.04</td> <td>0.90</td> <td>122.35</td> <td>102.32</td> <td>0.10</td> <td>-8.26</td> </tr> </tbody> </table> | Average Response |                        |                            |            |                      |                          |  | Dose | Green Signal | Actual Pct Green Cells | Normalized Pct Green Cells | Red Signal | Actual Pct Red Cells | Normalized Pct Red Cells | 0.1 uM | 99.09 | 0.90 | 162.30 | 99.16 | 0.11 | -9.57 | 1 uM | 97.85 | 0.80 | 59.77 | 102.60 | 0.13 | -1.95 | 10 uM | 105.04 | 0.90 | 122.35 | 102.32 | 0.10 | -8.26 |
|                |                                  | Average Response                                                                                                                                                                                                                                                                                                                                                                                                                                                                                                                                                                                                                                                                 |                  |                        |                            |            |                      |                          |  |      |              |                        |                            |            |                      |                          |        |       |      |        |       |      |       |      |       |      |       |        |      |       |       |        |      |        |        |      |       |
|                |                                  | Dose                                                                                                                                                                                                                                                                                                                                                                                                                                                                                                                                                                                                                                                                             | Green Signal     | Actual Pct Green Cells | Normalized Pct Green Cells | Red Signal | Actual Pct Red Cells | Normalized Pct Red Cells |  |      |              |                        |                            |            |                      |                          |        |       |      |        |       |      |       |      |       |      |       |        |      |       |       |        |      |        |        |      |       |
|                |                                  | 0.1 uM                                                                                                                                                                                                                                                                                                                                                                                                                                                                                                                                                                                                                                                                           | 99.09            | 0.90                   | 162.30                     | 99.16      | 0.11                 | -9.57                    |  |      |              |                        |                            |            |                      |                          |        |       |      |        |       |      |       |      |       |      |       |        |      |       |       |        |      |        |        |      |       |
| 1 uM           | 97.85                            | 0.80                                                                                                                                                                                                                                                                                                                                                                                                                                                                                                                                                                                                                                                                             | 59.77            | 102.60                 | 0.13                       | -1.95      |                      |                          |  |      |              |                        |                            |            |                      |                          |        |       |      |        |       |      |       |      |       |      |       |        |      |       |       |        |      |        |        |      |       |
| 10 uM          | 105.04                           | 0.90                                                                                                                                                                                                                                                                                                                                                                                                                                                                                                                                                                                                                                                                             | 122.35           | 102.32                 | 0.10                       | -8.26      |                      |                          |  |      |              |                        |                            |            |                      |                          |        |       |      |        |       |      |       |      |       |      |       |        |      |       |       |        |      |        |        |      |       |

| Compound                       | Normalized Values (A and B Sets) | Responses                                                                                                                                                                                                                                                                                                                                                                                                                                                                                                                                                                                                                                                                      |                  |                        |                            |            |                      |                          |  |      |              |                        |                            |            |                      |                          |        |       |      |       |       |      |        |      |       |      |       |       |      |        |       |       |      |       |       |      |        |
|--------------------------------|----------------------------------|--------------------------------------------------------------------------------------------------------------------------------------------------------------------------------------------------------------------------------------------------------------------------------------------------------------------------------------------------------------------------------------------------------------------------------------------------------------------------------------------------------------------------------------------------------------------------------------------------------------------------------------------------------------------------------|------------------|------------------------|----------------------------|------------|----------------------|--------------------------|--|------|--------------|------------------------|----------------------------|------------|----------------------|--------------------------|--------|-------|------|-------|-------|------|--------|------|-------|------|-------|-------|------|--------|-------|-------|------|-------|-------|------|--------|
| <b>Evacetrapib (LY2484595)</b> |                                  | <table border="1"> <thead> <tr> <th colspan="7">Average Response</th> </tr> <tr> <th>Dose</th> <th>Green Signal</th> <th>Actual Pct Green Cells</th> <th>Normalized Pct Green Cells</th> <th>Red Signal</th> <th>Actual Pct Red Cells</th> <th>Normalized Pct Red Cells</th> </tr> </thead> <tbody> <tr> <td>0.1 uM</td> <td>90.41</td> <td>0.87</td> <td>65.15</td> <td>68.91</td> <td>0.02</td> <td>-52.15</td> </tr> <tr> <td>1 uM</td> <td>90.62</td> <td>0.75</td> <td>10.28</td> <td>67.83</td> <td>0.02</td> <td>-60.16</td> </tr> <tr> <td>10 uM</td> <td>90.98</td> <td>0.79</td> <td>23.64</td> <td>62.36</td> <td>0.01</td> <td>-58.15</td> </tr> </tbody> </table> | Average Response |                        |                            |            |                      |                          |  | Dose | Green Signal | Actual Pct Green Cells | Normalized Pct Green Cells | Red Signal | Actual Pct Red Cells | Normalized Pct Red Cells | 0.1 uM | 90.41 | 0.87 | 65.15 | 68.91 | 0.02 | -52.15 | 1 uM | 90.62 | 0.75 | 10.28 | 67.83 | 0.02 | -60.16 | 10 uM | 90.98 | 0.79 | 23.64 | 62.36 | 0.01 | -58.15 |
|                                |                                  | Average Response                                                                                                                                                                                                                                                                                                                                                                                                                                                                                                                                                                                                                                                               |                  |                        |                            |            |                      |                          |  |      |              |                        |                            |            |                      |                          |        |       |      |       |       |      |        |      |       |      |       |       |      |        |       |       |      |       |       |      |        |
|                                |                                  | Dose                                                                                                                                                                                                                                                                                                                                                                                                                                                                                                                                                                                                                                                                           | Green Signal     | Actual Pct Green Cells | Normalized Pct Green Cells | Red Signal | Actual Pct Red Cells | Normalized Pct Red Cells |  |      |              |                        |                            |            |                      |                          |        |       |      |       |       |      |        |      |       |      |       |       |      |        |       |       |      |       |       |      |        |
|                                |                                  | 0.1 uM                                                                                                                                                                                                                                                                                                                                                                                                                                                                                                                                                                                                                                                                         | 90.41            | 0.87                   | 65.15                      | 68.91      | 0.02                 | -52.15                   |  |      |              |                        |                            |            |                      |                          |        |       |      |       |       |      |        |      |       |      |       |       |      |        |       |       |      |       |       |      |        |
| 1 uM                           | 90.62                            | 0.75                                                                                                                                                                                                                                                                                                                                                                                                                                                                                                                                                                                                                                                                           | 10.28            | 67.83                  | 0.02                       | -60.16     |                      |                          |  |      |              |                        |                            |            |                      |                          |        |       |      |       |       |      |        |      |       |      |       |       |      |        |       |       |      |       |       |      |        |
| 10 uM                          | 90.98                            | 0.79                                                                                                                                                                                                                                                                                                                                                                                                                                                                                                                                                                                                                                                                           | 23.64            | 62.36                  | 0.01                       | -58.15     |                      |                          |  |      |              |                        |                            |            |                      |                          |        |       |      |       |       |      |        |      |       |      |       |       |      |        |       |       |      |       |       |      |        |

| Compound                   | Normalized Values (A and B Sets) | Responses                                                                                                                                                                                                                                                                                                                                                                                                                                                                                                                                                                                                                                                                        |                  |                        |                            |            |                      |                          |  |      |              |                        |                            |            |                      |                          |        |        |      |        |       |      |        |      |       |      |       |       |      |        |       |       |      |       |        |      |       |
|----------------------------|----------------------------------|----------------------------------------------------------------------------------------------------------------------------------------------------------------------------------------------------------------------------------------------------------------------------------------------------------------------------------------------------------------------------------------------------------------------------------------------------------------------------------------------------------------------------------------------------------------------------------------------------------------------------------------------------------------------------------|------------------|------------------------|----------------------------|------------|----------------------|--------------------------|--|------|--------------|------------------------|----------------------------|------------|----------------------|--------------------------|--------|--------|------|--------|-------|------|--------|------|-------|------|-------|-------|------|--------|-------|-------|------|-------|--------|------|-------|
| <b>Everolimus (RAD001)</b> |                                  | <table border="1"> <thead> <tr> <th colspan="7">Average Response</th> </tr> <tr> <th>Dose</th> <th>Green Signal</th> <th>Actual Pct Green Cells</th> <th>Normalized Pct Green Cells</th> <th>Red Signal</th> <th>Actual Pct Red Cells</th> <th>Normalized Pct Red Cells</th> </tr> </thead> <tbody> <tr> <td>0.1 uM</td> <td>105.71</td> <td>0.95</td> <td>133.76</td> <td>83.89</td> <td>0.05</td> <td>-51.64</td> </tr> <tr> <td>1 uM</td> <td>91.26</td> <td>0.83</td> <td>-9.51</td> <td>91.10</td> <td>0.04</td> <td>-38.10</td> </tr> <tr> <td>10 uM</td> <td>99.91</td> <td>0.87</td> <td>84.93</td> <td>122.26</td> <td>0.13</td> <td>-5.00</td> </tr> </tbody> </table> | Average Response |                        |                            |            |                      |                          |  | Dose | Green Signal | Actual Pct Green Cells | Normalized Pct Green Cells | Red Signal | Actual Pct Red Cells | Normalized Pct Red Cells | 0.1 uM | 105.71 | 0.95 | 133.76 | 83.89 | 0.05 | -51.64 | 1 uM | 91.26 | 0.83 | -9.51 | 91.10 | 0.04 | -38.10 | 10 uM | 99.91 | 0.87 | 84.93 | 122.26 | 0.13 | -5.00 |
|                            |                                  | Average Response                                                                                                                                                                                                                                                                                                                                                                                                                                                                                                                                                                                                                                                                 |                  |                        |                            |            |                      |                          |  |      |              |                        |                            |            |                      |                          |        |        |      |        |       |      |        |      |       |      |       |       |      |        |       |       |      |       |        |      |       |
|                            |                                  | Dose                                                                                                                                                                                                                                                                                                                                                                                                                                                                                                                                                                                                                                                                             | Green Signal     | Actual Pct Green Cells | Normalized Pct Green Cells | Red Signal | Actual Pct Red Cells | Normalized Pct Red Cells |  |      |              |                        |                            |            |                      |                          |        |        |      |        |       |      |        |      |       |      |       |       |      |        |       |       |      |       |        |      |       |
|                            |                                  | 0.1 uM                                                                                                                                                                                                                                                                                                                                                                                                                                                                                                                                                                                                                                                                           | 105.71           | 0.95                   | 133.76                     | 83.89      | 0.05                 | -51.64                   |  |      |              |                        |                            |            |                      |                          |        |        |      |        |       |      |        |      |       |      |       |       |      |        |       |       |      |       |        |      |       |
| 1 uM                       | 91.26                            | 0.83                                                                                                                                                                                                                                                                                                                                                                                                                                                                                                                                                                                                                                                                             | -9.51            | 91.10                  | 0.04                       | -38.10     |                      |                          |  |      |              |                        |                            |            |                      |                          |        |        |      |        |       |      |        |      |       |      |       |       |      |        |       |       |      |       |        |      |       |
| 10 uM                      | 99.91                            | 0.87                                                                                                                                                                                                                                                                                                                                                                                                                                                                                                                                                                                                                                                                             | 84.93            | 122.26                 | 0.13                       | -5.00      |                      |                          |  |      |              |                        |                            |            |                      |                          |        |        |      |        |       |      |        |      |       |      |       |       |      |        |       |       |      |       |        |      |       |

| Compound          | Normalized Values (A and B Sets) | Responses                                                                                                                                                                                                                                                                                                                                                                                                                                                                                                                                                                                                                                                                         |                  |                        |                            |            |                      |                          |  |      |              |                        |                            |            |                      |                          |        |       |      |        |       |      |        |      |       |      |       |       |      |        |       |        |      |        |       |      |        |
|-------------------|----------------------------------|-----------------------------------------------------------------------------------------------------------------------------------------------------------------------------------------------------------------------------------------------------------------------------------------------------------------------------------------------------------------------------------------------------------------------------------------------------------------------------------------------------------------------------------------------------------------------------------------------------------------------------------------------------------------------------------|------------------|------------------------|----------------------------|------------|----------------------|--------------------------|--|------|--------------|------------------------|----------------------------|------------|----------------------|--------------------------|--------|-------|------|--------|-------|------|--------|------|-------|------|-------|-------|------|--------|-------|--------|------|--------|-------|------|--------|
| <b>Evodiamine</b> |                                  | <table border="1"> <thead> <tr> <th colspan="7">Average Response</th> </tr> <tr> <th>Dose</th> <th>Green Signal</th> <th>Actual Pct Green Cells</th> <th>Normalized Pct Green Cells</th> <th>Red Signal</th> <th>Actual Pct Red Cells</th> <th>Normalized Pct Red Cells</th> </tr> </thead> <tbody> <tr> <td>0.1 uM</td> <td>79.81</td> <td>0.76</td> <td>-32.73</td> <td>69.32</td> <td>0.01</td> <td>-48.80</td> </tr> <tr> <td>1 uM</td> <td>95.11</td> <td>0.79</td> <td>44.03</td> <td>93.63</td> <td>0.09</td> <td>-15.35</td> </tr> <tr> <td>10 uM</td> <td>112.94</td> <td>0.95</td> <td>346.71</td> <td>87.98</td> <td>0.06</td> <td>-32.18</td> </tr> </tbody> </table> | Average Response |                        |                            |            |                      |                          |  | Dose | Green Signal | Actual Pct Green Cells | Normalized Pct Green Cells | Red Signal | Actual Pct Red Cells | Normalized Pct Red Cells | 0.1 uM | 79.81 | 0.76 | -32.73 | 69.32 | 0.01 | -48.80 | 1 uM | 95.11 | 0.79 | 44.03 | 93.63 | 0.09 | -15.35 | 10 uM | 112.94 | 0.95 | 346.71 | 87.98 | 0.06 | -32.18 |
|                   |                                  | Average Response                                                                                                                                                                                                                                                                                                                                                                                                                                                                                                                                                                                                                                                                  |                  |                        |                            |            |                      |                          |  |      |              |                        |                            |            |                      |                          |        |       |      |        |       |      |        |      |       |      |       |       |      |        |       |        |      |        |       |      |        |
|                   |                                  | Dose                                                                                                                                                                                                                                                                                                                                                                                                                                                                                                                                                                                                                                                                              | Green Signal     | Actual Pct Green Cells | Normalized Pct Green Cells | Red Signal | Actual Pct Red Cells | Normalized Pct Red Cells |  |      |              |                        |                            |            |                      |                          |        |       |      |        |       |      |        |      |       |      |       |       |      |        |       |        |      |        |       |      |        |
|                   |                                  | 0.1 uM                                                                                                                                                                                                                                                                                                                                                                                                                                                                                                                                                                                                                                                                            | 79.81            | 0.76                   | -32.73                     | 69.32      | 0.01                 | -48.80                   |  |      |              |                        |                            |            |                      |                          |        |       |      |        |       |      |        |      |       |      |       |       |      |        |       |        |      |        |       |      |        |
| 1 uM              | 95.11                            | 0.79                                                                                                                                                                                                                                                                                                                                                                                                                                                                                                                                                                                                                                                                              | 44.03            | 93.63                  | 0.09                       | -15.35     |                      |                          |  |      |              |                        |                            |            |                      |                          |        |       |      |        |       |      |        |      |       |      |       |       |      |        |       |        |      |        |       |      |        |
| 10 uM             | 112.94                           | 0.95                                                                                                                                                                                                                                                                                                                                                                                                                                                                                                                                                                                                                                                                              | 346.71           | 87.98                  | 0.06                       | -32.18     |                      |                          |  |      |              |                        |                            |            |                      |                          |        |       |      |        |       |      |        |      |       |      |       |       |      |        |       |        |      |        |       |      |        |



| Compound                   | Normalized Values (A and B Sets) | Responses               |              |                        |                            |            |                      |                          |
|----------------------------|----------------------------------|-------------------------|--------------|------------------------|----------------------------|------------|----------------------|--------------------------|
| <b>EX 527 (Selisistat)</b> |                                  | <b>Average Response</b> |              |                        |                            |            |                      |                          |
|                            |                                  | Dose                    | Green Signal | Actual Pct Green Cells | Normalized Pct Green Cells | Red Signal | Actual Pct Red Cells | Normalized Pct Red Cells |
|                            |                                  | 0.1 uM                  | 102.65       | 0.86                   | 90.50                      | 113.46     | 0.17                 | 10.37                    |
|                            |                                  | 1 uM                    | 72.71        | 0.54                   | 250.72                     | 95.49      | 0.09                 | -15.90                   |
| 10 uM                      | 96.91                            | 0.81                    | 58.28        | 98.13                  | 0.08                       | -22.36     |                      |                          |

| Compound                           | Normalized Values (A and B Sets) | Responses               |              |                        |                            |            |                      |                          |
|------------------------------------|----------------------------------|-------------------------|--------------|------------------------|----------------------------|------------|----------------------|--------------------------|
| <b>Farnesyl Thiosalicylic Acid</b> |                                  | <b>Average Response</b> |              |                        |                            |            |                      |                          |
|                                    |                                  | Dose                    | Green Signal | Actual Pct Green Cells | Normalized Pct Green Cells | Red Signal | Actual Pct Red Cells | Normalized Pct Red Cells |
|                                    |                                  | 0.1 uM                  | 93.75        | 0.88                   | 93.16                      | 71.93      | 0.01                 | -67.53                   |
|                                    |                                  | 1 uM                    | 93.47        | 0.87                   | 162.62                     | 72.31      | 0.02                 | -39.08                   |
| 10 uM                              | 95.35                            | 0.90                    | 86.38        | 62.53                  | 0.03                       | -37.90     |                      |                          |

| Compound                     | Normalized Values (A and B Sets) | Responses               |              |                        |                            |            |                      |                          |
|------------------------------|----------------------------------|-------------------------|--------------|------------------------|----------------------------|------------|----------------------|--------------------------|
| <b>Fasudil (HA-1077) HCl</b> |                                  | <b>Average Response</b> |              |                        |                            |            |                      |                          |
|                              |                                  | Dose                    | Green Signal | Actual Pct Green Cells | Normalized Pct Green Cells | Red Signal | Actual Pct Red Cells | Normalized Pct Red Cells |
|                              |                                  | 0.1 uM                  | 102.67       | 0.91                   | 108.29                     | 101.81     | 0.08                 | -24.64                   |
|                              |                                  | 1 uM                    | 96.48        | 0.82                   | 45.26                      | 87.94      | 0.05                 | -34.79                   |
| 10 uM                        | 118.94                           | 0.90                    | 116.10       | 112.87                 | 0.11                       | -12.06     |                      |                          |

| Compound          | Normalized Values (A and B Sets) | Responses               |              |                        |                            |            |                      |                          |
|-------------------|----------------------------------|-------------------------|--------------|------------------------|----------------------------|------------|----------------------|--------------------------|
| <b>Febuxostat</b> |                                  | <b>Average Response</b> |              |                        |                            |            |                      |                          |
|                   |                                  | Dose                    | Green Signal | Actual Pct Green Cells | Normalized Pct Green Cells | Red Signal | Actual Pct Red Cells | Normalized Pct Red Cells |
|                   |                                  | 0.1 uM                  | 94.64        | 0.83                   | 60.32                      | 80.43      | 0.03                 | -57.85                   |
|                   |                                  | 1 uM                    | 94.70        | 0.80                   | 16.53                      | 99.10      | 0.05                 | -32.59                   |
| 10 uM             | 92.69                            | 0.79                    | 38.05        | 125.78                 | 0.14                       | 9.83       |                      |                          |

| Compound                  | Normalized Values (A and B Sets) | Responses               |              |                        |                            |            |                      |                          |
|---------------------------|----------------------------------|-------------------------|--------------|------------------------|----------------------------|------------|----------------------|--------------------------|
| <b>Fenoprofen Calcium</b> |                                  | <b>Average Response</b> |              |                        |                            |            |                      |                          |
|                           |                                  | Dose                    | Green Signal | Actual Pct Green Cells | Normalized Pct Green Cells | Red Signal | Actual Pct Red Cells | Normalized Pct Red Cells |
|                           |                                  | 0.1 uM                  | 115.56       | 0.94                   | 137.65                     | 117.04     | 0.14                 | 0.90                     |
|                           |                                  | 1 uM                    | 96.46        | 0.81                   | 1.93                       | 104.63     | 0.11                 | -5.17                    |
| 10 uM                     | 112.41                           | 0.89                    | 107.16       | 127.12                 | 0.17                       | 18.79      |                      |                          |

| Compound                          | Normalized Values (A and B Sets) | Responses                                                                                                                                                                                                                                                                                                                                                                                                                                                                                                                                                                                                                                                                      |                  |                        |                            |            |                      |                          |  |      |              |                        |                            |            |                      |                          |        |       |      |       |       |      |        |      |       |      |       |       |      |        |       |       |      |       |       |      |        |
|-----------------------------------|----------------------------------|--------------------------------------------------------------------------------------------------------------------------------------------------------------------------------------------------------------------------------------------------------------------------------------------------------------------------------------------------------------------------------------------------------------------------------------------------------------------------------------------------------------------------------------------------------------------------------------------------------------------------------------------------------------------------------|------------------|------------------------|----------------------------|------------|----------------------|--------------------------|--|------|--------------|------------------------|----------------------------|------------|----------------------|--------------------------|--------|-------|------|-------|-------|------|--------|------|-------|------|-------|-------|------|--------|-------|-------|------|-------|-------|------|--------|
| <b>Fenoprofen calcium hydrate</b> |                                  | <table border="1"> <thead> <tr> <th colspan="7">Average Response</th> </tr> <tr> <th>Dose</th> <th>Green Signal</th> <th>Actual Pct Green Cells</th> <th>Normalized Pct Green Cells</th> <th>Red Signal</th> <th>Actual Pct Red Cells</th> <th>Normalized Pct Red Cells</th> </tr> </thead> <tbody> <tr> <td>0.1 uM</td> <td>95.03</td> <td>0.88</td> <td>53.40</td> <td>80.04</td> <td>0.05</td> <td>-38.60</td> </tr> <tr> <td>1 uM</td> <td>95.22</td> <td>0.83</td> <td>76.95</td> <td>83.19</td> <td>0.03</td> <td>-50.56</td> </tr> <tr> <td>10 uM</td> <td>96.01</td> <td>0.81</td> <td>82.48</td> <td>66.71</td> <td>0.01</td> <td>-56.34</td> </tr> </tbody> </table> | Average Response |                        |                            |            |                      |                          |  | Dose | Green Signal | Actual Pct Green Cells | Normalized Pct Green Cells | Red Signal | Actual Pct Red Cells | Normalized Pct Red Cells | 0.1 uM | 95.03 | 0.88 | 53.40 | 80.04 | 0.05 | -38.60 | 1 uM | 95.22 | 0.83 | 76.95 | 83.19 | 0.03 | -50.56 | 10 uM | 96.01 | 0.81 | 82.48 | 66.71 | 0.01 | -56.34 |
|                                   |                                  | Average Response                                                                                                                                                                                                                                                                                                                                                                                                                                                                                                                                                                                                                                                               |                  |                        |                            |            |                      |                          |  |      |              |                        |                            |            |                      |                          |        |       |      |       |       |      |        |      |       |      |       |       |      |        |       |       |      |       |       |      |        |
|                                   |                                  | Dose                                                                                                                                                                                                                                                                                                                                                                                                                                                                                                                                                                                                                                                                           | Green Signal     | Actual Pct Green Cells | Normalized Pct Green Cells | Red Signal | Actual Pct Red Cells | Normalized Pct Red Cells |  |      |              |                        |                            |            |                      |                          |        |       |      |       |       |      |        |      |       |      |       |       |      |        |       |       |      |       |       |      |        |
|                                   |                                  | 0.1 uM                                                                                                                                                                                                                                                                                                                                                                                                                                                                                                                                                                                                                                                                         | 95.03            | 0.88                   | 53.40                      | 80.04      | 0.05                 | -38.60                   |  |      |              |                        |                            |            |                      |                          |        |       |      |       |       |      |        |      |       |      |       |       |      |        |       |       |      |       |       |      |        |
| 1 uM                              | 95.22                            | 0.83                                                                                                                                                                                                                                                                                                                                                                                                                                                                                                                                                                                                                                                                           | 76.95            | 83.19                  | 0.03                       | -50.56     |                      |                          |  |      |              |                        |                            |            |                      |                          |        |       |      |       |       |      |        |      |       |      |       |       |      |        |       |       |      |       |       |      |        |
| 10 uM                             | 96.01                            | 0.81                                                                                                                                                                                                                                                                                                                                                                                                                                                                                                                                                                                                                                                                           | 82.48            | 66.71                  | 0.01                       | -56.34     |                      |                          |  |      |              |                        |                            |            |                      |                          |        |       |      |       |       |      |        |      |       |      |       |       |      |        |       |       |      |       |       |      |        |

| Compound           | Normalized Values (A and B Sets) | Responses                                                                                                                                                                                                                                                                                                                                                                                                                                                                                                                                                                                                                                                                       |                  |                        |                            |            |                      |                          |  |      |              |                        |                            |            |                      |                          |        |        |      |        |        |      |        |      |       |      |      |       |      |        |       |       |      |       |       |      |       |
|--------------------|----------------------------------|---------------------------------------------------------------------------------------------------------------------------------------------------------------------------------------------------------------------------------------------------------------------------------------------------------------------------------------------------------------------------------------------------------------------------------------------------------------------------------------------------------------------------------------------------------------------------------------------------------------------------------------------------------------------------------|------------------|------------------------|----------------------------|------------|----------------------|--------------------------|--|------|--------------|------------------------|----------------------------|------------|----------------------|--------------------------|--------|--------|------|--------|--------|------|--------|------|-------|------|------|-------|------|--------|-------|-------|------|-------|-------|------|-------|
| <b>Fenretinide</b> |                                  | <table border="1"> <thead> <tr> <th colspan="7">Average Response</th> </tr> <tr> <th>Dose</th> <th>Green Signal</th> <th>Actual Pct Green Cells</th> <th>Normalized Pct Green Cells</th> <th>Red Signal</th> <th>Actual Pct Red Cells</th> <th>Normalized Pct Red Cells</th> </tr> </thead> <tbody> <tr> <td>0.1 uM</td> <td>104.35</td> <td>0.94</td> <td>143.42</td> <td>103.24</td> <td>0.10</td> <td>-11.26</td> </tr> <tr> <td>1 uM</td> <td>96.15</td> <td>0.88</td> <td>1.93</td> <td>89.56</td> <td>0.05</td> <td>-28.29</td> </tr> <tr> <td>10 uM</td> <td>96.46</td> <td>0.85</td> <td>42.26</td> <td>96.52</td> <td>0.10</td> <td>-7.46</td> </tr> </tbody> </table> | Average Response |                        |                            |            |                      |                          |  | Dose | Green Signal | Actual Pct Green Cells | Normalized Pct Green Cells | Red Signal | Actual Pct Red Cells | Normalized Pct Red Cells | 0.1 uM | 104.35 | 0.94 | 143.42 | 103.24 | 0.10 | -11.26 | 1 uM | 96.15 | 0.88 | 1.93 | 89.56 | 0.05 | -28.29 | 10 uM | 96.46 | 0.85 | 42.26 | 96.52 | 0.10 | -7.46 |
|                    |                                  | Average Response                                                                                                                                                                                                                                                                                                                                                                                                                                                                                                                                                                                                                                                                |                  |                        |                            |            |                      |                          |  |      |              |                        |                            |            |                      |                          |        |        |      |        |        |      |        |      |       |      |      |       |      |        |       |       |      |       |       |      |       |
|                    |                                  | Dose                                                                                                                                                                                                                                                                                                                                                                                                                                                                                                                                                                                                                                                                            | Green Signal     | Actual Pct Green Cells | Normalized Pct Green Cells | Red Signal | Actual Pct Red Cells | Normalized Pct Red Cells |  |      |              |                        |                            |            |                      |                          |        |        |      |        |        |      |        |      |       |      |      |       |      |        |       |       |      |       |       |      |       |
|                    |                                  | 0.1 uM                                                                                                                                                                                                                                                                                                                                                                                                                                                                                                                                                                                                                                                                          | 104.35           | 0.94                   | 143.42                     | 103.24     | 0.10                 | -11.26                   |  |      |              |                        |                            |            |                      |                          |        |        |      |        |        |      |        |      |       |      |      |       |      |        |       |       |      |       |       |      |       |
| 1 uM               | 96.15                            | 0.88                                                                                                                                                                                                                                                                                                                                                                                                                                                                                                                                                                                                                                                                            | 1.93             | 89.56                  | 0.05                       | -28.29     |                      |                          |  |      |              |                        |                            |            |                      |                          |        |        |      |        |        |      |        |      |       |      |      |       |      |        |       |       |      |       |       |      |       |
| 10 uM              | 96.46                            | 0.85                                                                                                                                                                                                                                                                                                                                                                                                                                                                                                                                                                                                                                                                            | 42.26            | 96.52                  | 0.10                       | -7.46      |                      |                          |  |      |              |                        |                            |            |                      |                          |        |        |      |        |        |      |        |      |       |      |      |       |      |        |       |       |      |       |       |      |       |

| Compound                     | Normalized Values (A and B Sets) | Responses                                                                                                                                                                                                                                                                                                                                                                                                                                                                                                                                                                                                                                                                        |                  |                        |                            |            |                      |                          |  |      |              |                        |                            |            |                      |                          |        |       |      |       |        |      |       |      |       |      |        |       |      |        |       |       |      |       |        |      |        |
|------------------------------|----------------------------------|----------------------------------------------------------------------------------------------------------------------------------------------------------------------------------------------------------------------------------------------------------------------------------------------------------------------------------------------------------------------------------------------------------------------------------------------------------------------------------------------------------------------------------------------------------------------------------------------------------------------------------------------------------------------------------|------------------|------------------------|----------------------------|------------|----------------------|--------------------------|--|------|--------------|------------------------|----------------------------|------------|----------------------|--------------------------|--------|-------|------|-------|--------|------|-------|------|-------|------|--------|-------|------|--------|-------|-------|------|-------|--------|------|--------|
| <b>Fenticonazole Nitrate</b> |                                  | <table border="1"> <thead> <tr> <th colspan="7">Average Response</th> </tr> <tr> <th>Dose</th> <th>Green Signal</th> <th>Actual Pct Green Cells</th> <th>Normalized Pct Green Cells</th> <th>Red Signal</th> <th>Actual Pct Red Cells</th> <th>Normalized Pct Red Cells</th> </tr> </thead> <tbody> <tr> <td>0.1 uM</td> <td>98.51</td> <td>0.87</td> <td>61.34</td> <td>108.58</td> <td>0.13</td> <td>-5.64</td> </tr> <tr> <td>1 uM</td> <td>91.57</td> <td>0.76</td> <td>-88.08</td> <td>95.98</td> <td>0.08</td> <td>-21.38</td> </tr> <tr> <td>10 uM</td> <td>99.65</td> <td>0.83</td> <td>69.31</td> <td>100.52</td> <td>0.09</td> <td>-13.13</td> </tr> </tbody> </table> | Average Response |                        |                            |            |                      |                          |  | Dose | Green Signal | Actual Pct Green Cells | Normalized Pct Green Cells | Red Signal | Actual Pct Red Cells | Normalized Pct Red Cells | 0.1 uM | 98.51 | 0.87 | 61.34 | 108.58 | 0.13 | -5.64 | 1 uM | 91.57 | 0.76 | -88.08 | 95.98 | 0.08 | -21.38 | 10 uM | 99.65 | 0.83 | 69.31 | 100.52 | 0.09 | -13.13 |
|                              |                                  | Average Response                                                                                                                                                                                                                                                                                                                                                                                                                                                                                                                                                                                                                                                                 |                  |                        |                            |            |                      |                          |  |      |              |                        |                            |            |                      |                          |        |       |      |       |        |      |       |      |       |      |        |       |      |        |       |       |      |       |        |      |        |
|                              |                                  | Dose                                                                                                                                                                                                                                                                                                                                                                                                                                                                                                                                                                                                                                                                             | Green Signal     | Actual Pct Green Cells | Normalized Pct Green Cells | Red Signal | Actual Pct Red Cells | Normalized Pct Red Cells |  |      |              |                        |                            |            |                      |                          |        |       |      |       |        |      |       |      |       |      |        |       |      |        |       |       |      |       |        |      |        |
|                              |                                  | 0.1 uM                                                                                                                                                                                                                                                                                                                                                                                                                                                                                                                                                                                                                                                                           | 98.51            | 0.87                   | 61.34                      | 108.58     | 0.13                 | -5.64                    |  |      |              |                        |                            |            |                      |                          |        |       |      |       |        |      |       |      |       |      |        |       |      |        |       |       |      |       |        |      |        |
| 1 uM                         | 91.57                            | 0.76                                                                                                                                                                                                                                                                                                                                                                                                                                                                                                                                                                                                                                                                             | -88.08           | 95.98                  | 0.08                       | -21.38     |                      |                          |  |      |              |                        |                            |            |                      |                          |        |       |      |       |        |      |       |      |       |      |        |       |      |        |       |       |      |       |        |      |        |
| 10 uM                        | 99.65                            | 0.83                                                                                                                                                                                                                                                                                                                                                                                                                                                                                                                                                                                                                                                                             | 69.31            | 100.52                 | 0.09                       | -13.13     |                      |                          |  |      |              |                        |                            |            |                      |                          |        |       |      |       |        |      |       |      |       |      |        |       |      |        |       |       |      |       |        |      |        |

| Compound                    | Normalized Values (A and B Sets) | Responses                                                                                                                                                                                                                                                                                                                                                                                                                                                                                                                                                                                                                                                                        |                  |                        |                            |            |                      |                          |  |      |              |                        |                            |            |                      |                          |        |       |      |        |       |      |        |      |       |      |        |       |      |        |       |       |      |       |       |      |        |
|-----------------------------|----------------------------------|----------------------------------------------------------------------------------------------------------------------------------------------------------------------------------------------------------------------------------------------------------------------------------------------------------------------------------------------------------------------------------------------------------------------------------------------------------------------------------------------------------------------------------------------------------------------------------------------------------------------------------------------------------------------------------|------------------|------------------------|----------------------------|------------|----------------------|--------------------------|--|------|--------------|------------------------|----------------------------|------------|----------------------|--------------------------|--------|-------|------|--------|-------|------|--------|------|-------|------|--------|-------|------|--------|-------|-------|------|-------|-------|------|--------|
| <b>Ferostatin-1 (Fer-1)</b> |                                  | <table border="1"> <thead> <tr> <th colspan="7">Average Response</th> </tr> <tr> <th>Dose</th> <th>Green Signal</th> <th>Actual Pct Green Cells</th> <th>Normalized Pct Green Cells</th> <th>Red Signal</th> <th>Actual Pct Red Cells</th> <th>Normalized Pct Red Cells</th> </tr> </thead> <tbody> <tr> <td>0.1 uM</td> <td>97.38</td> <td>0.90</td> <td>107.09</td> <td>68.02</td> <td>0.01</td> <td>-70.14</td> </tr> <tr> <td>1 uM</td> <td>83.22</td> <td>0.75</td> <td>730.91</td> <td>75.53</td> <td>0.04</td> <td>-28.12</td> </tr> <tr> <td>10 uM</td> <td>91.50</td> <td>0.86</td> <td>46.98</td> <td>87.86</td> <td>0.05</td> <td>-27.65</td> </tr> </tbody> </table> | Average Response |                        |                            |            |                      |                          |  | Dose | Green Signal | Actual Pct Green Cells | Normalized Pct Green Cells | Red Signal | Actual Pct Red Cells | Normalized Pct Red Cells | 0.1 uM | 97.38 | 0.90 | 107.09 | 68.02 | 0.01 | -70.14 | 1 uM | 83.22 | 0.75 | 730.91 | 75.53 | 0.04 | -28.12 | 10 uM | 91.50 | 0.86 | 46.98 | 87.86 | 0.05 | -27.65 |
|                             |                                  | Average Response                                                                                                                                                                                                                                                                                                                                                                                                                                                                                                                                                                                                                                                                 |                  |                        |                            |            |                      |                          |  |      |              |                        |                            |            |                      |                          |        |       |      |        |       |      |        |      |       |      |        |       |      |        |       |       |      |       |       |      |        |
|                             |                                  | Dose                                                                                                                                                                                                                                                                                                                                                                                                                                                                                                                                                                                                                                                                             | Green Signal     | Actual Pct Green Cells | Normalized Pct Green Cells | Red Signal | Actual Pct Red Cells | Normalized Pct Red Cells |  |      |              |                        |                            |            |                      |                          |        |       |      |        |       |      |        |      |       |      |        |       |      |        |       |       |      |       |       |      |        |
|                             |                                  | 0.1 uM                                                                                                                                                                                                                                                                                                                                                                                                                                                                                                                                                                                                                                                                           | 97.38            | 0.90                   | 107.09                     | 68.02      | 0.01                 | -70.14                   |  |      |              |                        |                            |            |                      |                          |        |       |      |        |       |      |        |      |       |      |        |       |      |        |       |       |      |       |       |      |        |
| 1 uM                        | 83.22                            | 0.75                                                                                                                                                                                                                                                                                                                                                                                                                                                                                                                                                                                                                                                                             | 730.91           | 75.53                  | 0.04                       | -28.12     |                      |                          |  |      |              |                        |                            |            |                      |                          |        |       |      |        |       |      |        |      |       |      |        |       |      |        |       |       |      |       |       |      |        |
| 10 uM                       | 91.50                            | 0.86                                                                                                                                                                                                                                                                                                                                                                                                                                                                                                                                                                                                                                                                             | 46.98            | 87.86                  | 0.05                       | -27.65     |                      |                          |  |      |              |                        |                            |            |                      |                          |        |       |      |        |       |      |        |      |       |      |        |       |      |        |       |       |      |       |       |      |        |

| Compound                     | Normalized Values (A and B Sets) | Responses                                                                                                                                                                                                                                                                                                                                                                                                                                                                                                                                                                                                                                                                        |                  |                        |                            |            |                      |                          |  |      |              |                        |                            |            |                      |                          |        |        |      |        |       |      |        |      |       |      |      |       |      |        |       |       |      |        |        |      |       |
|------------------------------|----------------------------------|----------------------------------------------------------------------------------------------------------------------------------------------------------------------------------------------------------------------------------------------------------------------------------------------------------------------------------------------------------------------------------------------------------------------------------------------------------------------------------------------------------------------------------------------------------------------------------------------------------------------------------------------------------------------------------|------------------|------------------------|----------------------------|------------|----------------------|--------------------------|--|------|--------------|------------------------|----------------------------|------------|----------------------|--------------------------|--------|--------|------|--------|-------|------|--------|------|-------|------|------|-------|------|--------|-------|-------|------|--------|--------|------|-------|
| <b>Fesoterodine Fumarate</b> |                                  | <table border="1"> <thead> <tr> <th colspan="7">Average Response</th> </tr> <tr> <th>Dose</th> <th>Green Signal</th> <th>Actual Pct Green Cells</th> <th>Normalized Pct Green Cells</th> <th>Red Signal</th> <th>Actual Pct Red Cells</th> <th>Normalized Pct Red Cells</th> </tr> </thead> <tbody> <tr> <td>0.1 uM</td> <td>102.67</td> <td>0.92</td> <td>126.35</td> <td>68.35</td> <td>0.02</td> <td>-46.96</td> </tr> <tr> <td>1 uM</td> <td>87.41</td> <td>0.71</td> <td>3.42</td> <td>74.83</td> <td>0.03</td> <td>-41.47</td> </tr> <tr> <td>10 uM</td> <td>98.18</td> <td>0.87</td> <td>-95.50</td> <td>101.54</td> <td>0.11</td> <td>-5.62</td> </tr> </tbody> </table> | Average Response |                        |                            |            |                      |                          |  | Dose | Green Signal | Actual Pct Green Cells | Normalized Pct Green Cells | Red Signal | Actual Pct Red Cells | Normalized Pct Red Cells | 0.1 uM | 102.67 | 0.92 | 126.35 | 68.35 | 0.02 | -46.96 | 1 uM | 87.41 | 0.71 | 3.42 | 74.83 | 0.03 | -41.47 | 10 uM | 98.18 | 0.87 | -95.50 | 101.54 | 0.11 | -5.62 |
|                              |                                  | Average Response                                                                                                                                                                                                                                                                                                                                                                                                                                                                                                                                                                                                                                                                 |                  |                        |                            |            |                      |                          |  |      |              |                        |                            |            |                      |                          |        |        |      |        |       |      |        |      |       |      |      |       |      |        |       |       |      |        |        |      |       |
|                              |                                  | Dose                                                                                                                                                                                                                                                                                                                                                                                                                                                                                                                                                                                                                                                                             | Green Signal     | Actual Pct Green Cells | Normalized Pct Green Cells | Red Signal | Actual Pct Red Cells | Normalized Pct Red Cells |  |      |              |                        |                            |            |                      |                          |        |        |      |        |       |      |        |      |       |      |      |       |      |        |       |       |      |        |        |      |       |
|                              |                                  | 0.1 uM                                                                                                                                                                                                                                                                                                                                                                                                                                                                                                                                                                                                                                                                           | 102.67           | 0.92                   | 126.35                     | 68.35      | 0.02                 | -46.96                   |  |      |              |                        |                            |            |                      |                          |        |        |      |        |       |      |        |      |       |      |      |       |      |        |       |       |      |        |        |      |       |
| 1 uM                         | 87.41                            | 0.71                                                                                                                                                                                                                                                                                                                                                                                                                                                                                                                                                                                                                                                                             | 3.42             | 74.83                  | 0.03                       | -41.47     |                      |                          |  |      |              |                        |                            |            |                      |                          |        |        |      |        |       |      |        |      |       |      |      |       |      |        |       |       |      |        |        |      |       |
| 10 uM                        | 98.18                            | 0.87                                                                                                                                                                                                                                                                                                                                                                                                                                                                                                                                                                                                                                                                             | -95.50           | 101.54                 | 0.11                       | -5.62      |                      |                          |  |      |              |                        |                            |            |                      |                          |        |        |      |        |       |      |        |      |       |      |      |       |      |        |       |       |      |        |        |      |       |

Compound

Normalized Values (A and B Sets)

Responses

| FG-4592 |       |      | Average Response |              |                        |                            |            |                      |                          |
|---------|-------|------|------------------|--------------|------------------------|----------------------------|------------|----------------------|--------------------------|
|         |       |      | Dose             | Green Signal | Actual Pct Green Cells | Normalized Pct Green Cells | Red Signal | Actual Pct Red Cells | Normalized Pct Red Cells |
|         |       |      | 0.1 uM           | 96.15        | 0.88                   | 90.45                      | 88.13      | 0.06                 | -39.10                   |
|         |       |      | 1 uM             | 86.49        | 0.79                   | -288.75                    | 86.05      | 0.07                 | -15.23                   |
| 10 uM   | 94.24 | 0.86 | 42.42            | 87.97        | 0.11                   | -3.71                      |            |                      |                          |

Compound

Normalized Values (A and B Sets)

Responses

| Fidaxomicin |       |      | Average Response |              |                        |                            |            |                      |                          |
|-------------|-------|------|------------------|--------------|------------------------|----------------------------|------------|----------------------|--------------------------|
|             |       |      | Dose             | Green Signal | Actual Pct Green Cells | Normalized Pct Green Cells | Red Signal | Actual Pct Red Cells | Normalized Pct Red Cells |
|             |       |      | 0.1 uM           | 96.71        | 0.89                   | 43.87                      | 104.52     | 0.13                 | 0.64                     |
|             |       |      | 1 uM             | 83.72        | 0.68                   | -38.30                     | 74.64      | 0.03                 | -54.05                   |
| 10 uM       | 82.86 | 0.64 | -226.68          | 80.26        | 0.04                   | -40.47                     |            |                      |                          |

Compound

Normalized Values (A and B Sets)

Responses

| Flavopiridol HCl |       |      | Average Response |              |                        |                            |            |                      |                          |
|------------------|-------|------|------------------|--------------|------------------------|----------------------------|------------|----------------------|--------------------------|
|                  |       |      | Dose             | Green Signal | Actual Pct Green Cells | Normalized Pct Green Cells | Red Signal | Actual Pct Red Cells | Normalized Pct Red Cells |
|                  |       |      | 0.1 uM           | 87.14        | 0.80                   | 5.20                       | 88.14      | 0.06                 | -24.46                   |
|                  |       |      | 1 uM             | 93.37        | 0.70                   | -11.37                     | 80.11      | 0.04                 | -36.17                   |
| 10 uM            | 86.53 | 0.72 | -853.25          | 88.33        | 0.09                   | -13.98                     |            |                      |                          |

Compound

Normalized Values (A and B Sets)

Responses

| Flubendazole |        |      | Average Response |              |                        |                            |            |                      |                          |
|--------------|--------|------|------------------|--------------|------------------------|----------------------------|------------|----------------------|--------------------------|
|              |        |      | Dose             | Green Signal | Actual Pct Green Cells | Normalized Pct Green Cells | Red Signal | Actual Pct Red Cells | Normalized Pct Red Cells |
|              |        |      | 0.1 uM           | 97.42        | 0.86                   | 54.49                      | 101.15     | 0.09                 | -17.33                   |
|              |        |      | 1 uM             | 107.06       | 0.88                   | 84.67                      | 96.72      | 0.08                 | -20.19                   |
| 10 uM        | 105.89 | 0.84 | 78.21            | 112.14       | 0.11                   | -0.53                      |            |                      |                          |

Compound

Normalized Values (A and B Sets)

Responses

| Flupirtine maleate |       |      | Average Response |              |                        |                            |            |                      |                          |
|--------------------|-------|------|------------------|--------------|------------------------|----------------------------|------------|----------------------|--------------------------|
|                    |       |      | Dose             | Green Signal | Actual Pct Green Cells | Normalized Pct Green Cells | Red Signal | Actual Pct Red Cells | Normalized Pct Red Cells |
|                    |       |      | 0.1 uM           | 90.94        | 0.83                   | 43.68                      | 106.32     | 0.13                 | -5.65                    |
| 1 uM               | 90.19 | 0.77 | -82.65           | 108.30       | 0.12                   | -1.54                      |            |                      |                          |

| Compound | Normalized Values (A and B Sets) | Responses |        |      |       |        |      |       |
|----------|----------------------------------|-----------|--------|------|-------|--------|------|-------|
|          |                                  | 10 uM     | 121.33 | 0.84 | 61.40 | 129.87 | 0.19 | 31.22 |

| Compound            | Normalized Values (A and B Sets) | Responses               |              |                        |                            |            |                      |                          |
|---------------------|----------------------------------|-------------------------|--------------|------------------------|----------------------------|------------|----------------------|--------------------------|
| <b>Flurbiprofen</b> |                                  | <b>Average Response</b> |              |                        |                            |            |                      |                          |
|                     |                                  | Dose                    | Green Signal | Actual Pct Green Cells | Normalized Pct Green Cells | Red Signal | Actual Pct Red Cells | Normalized Pct Red Cells |
|                     |                                  | 0.1 uM                  | 84.76        | 0.78                   | -25.15                     | 110.15     | 0.12                 | -8.18                    |
|                     |                                  | 1 uM                    | 93.49        | 0.75                   | -96.73                     | 112.65     | 0.13                 | 3.09                     |
| 10 uM               | 114.36                           | 0.87                    | 95.46        | 122.04                 | 0.16                       | 18.15      |                      |                          |

| Compound                  | Normalized Values (A and B Sets) | Responses               |              |                        |                            |            |                      |                          |
|---------------------------|----------------------------------|-------------------------|--------------|------------------------|----------------------------|------------|----------------------|--------------------------|
| <b>Fluvastatin Sodium</b> |                                  | <b>Average Response</b> |              |                        |                            |            |                      |                          |
|                           |                                  | Dose                    | Green Signal | Actual Pct Green Cells | Normalized Pct Green Cells | Red Signal | Actual Pct Red Cells | Normalized Pct Red Cells |
|                           |                                  | 0.1 uM                  | 90.59        | 0.82                   | 13.31                      | 101.51     | 0.07                 | -36.55                   |
|                           |                                  | 1 uM                    | 101.89       | 0.84                   | 66.20                      | 95.85      | 0.07                 | -26.53                   |
| 10 uM                     | 101.46                           | 0.78                    | 34.18        | 114.27                 | 0.14                       | 3.34       |                      |                          |

| Compound                      | Normalized Values (A and B Sets) | Responses               |              |                        |                            |            |                      |                          |
|-------------------------------|----------------------------------|-------------------------|--------------|------------------------|----------------------------|------------|----------------------|--------------------------|
| <b>Foretinib (GSK1363089)</b> |                                  | <b>Average Response</b> |              |                        |                            |            |                      |                          |
|                               |                                  | Dose                    | Green Signal | Actual Pct Green Cells | Normalized Pct Green Cells | Red Signal | Actual Pct Red Cells | Normalized Pct Red Cells |
|                               |                                  | 0.1 uM                  | 90.90        | 0.86                   | 82.03                      | 88.30      | 0.04                 | -50.16                   |
|                               |                                  | 1 uM                    | 94.40        | 0.86                   | 83.25                      | 75.40      | 0.01                 | -50.87                   |
| 10 uM                         | 100.19                           | 0.88                    | 103.43       | 101.50                 | 0.06                       | -28.35     |                      |                          |

| Compound         | Normalized Values (A and B Sets) | Responses               |              |                        |                            |            |                      |                          |
|------------------|----------------------------------|-------------------------|--------------|------------------------|----------------------------|------------|----------------------|--------------------------|
| <b>Forskolin</b> |                                  | <b>Average Response</b> |              |                        |                            |            |                      |                          |
|                  |                                  | Dose                    | Green Signal | Actual Pct Green Cells | Normalized Pct Green Cells | Red Signal | Actual Pct Red Cells | Normalized Pct Red Cells |
|                  |                                  | 0.1 uM                  | 97.90        | 0.89                   | 98.61                      | 87.43      | 0.05                 | -31.00                   |
|                  |                                  | 1 uM                    | 105.00       | 0.90                   | 107.16                     | 98.69      | 0.09                 | -13.86                   |
| 10 uM            | 95.35                            | 0.90                    | 255.59       | 78.12                  | 0.03                       | -45.92     |                      |                          |

| Compound                              | Normalized Values (A and B Sets) | Responses               |              |                        |                            |            |                      |
|---------------------------------------|----------------------------------|-------------------------|--------------|------------------------|----------------------------|------------|----------------------|
| <b>Fosaprepitant dimeglumine salt</b> |                                  | <b>Average Response</b> |              |                        |                            |            |                      |
|                                       |                                  | Dose                    | Green Signal | Actual Pct Green Cells | Normalized Pct Green Cells | Red Signal | Actual Pct Red Cells |

Compound

Normalized Values (A and B Sets)

Responses

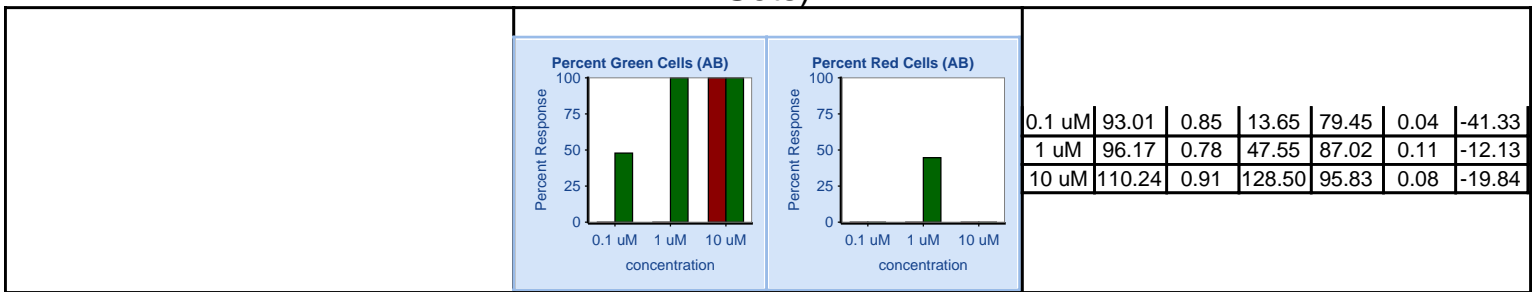

Compound

Normalized Values (A and B Sets)

Responses

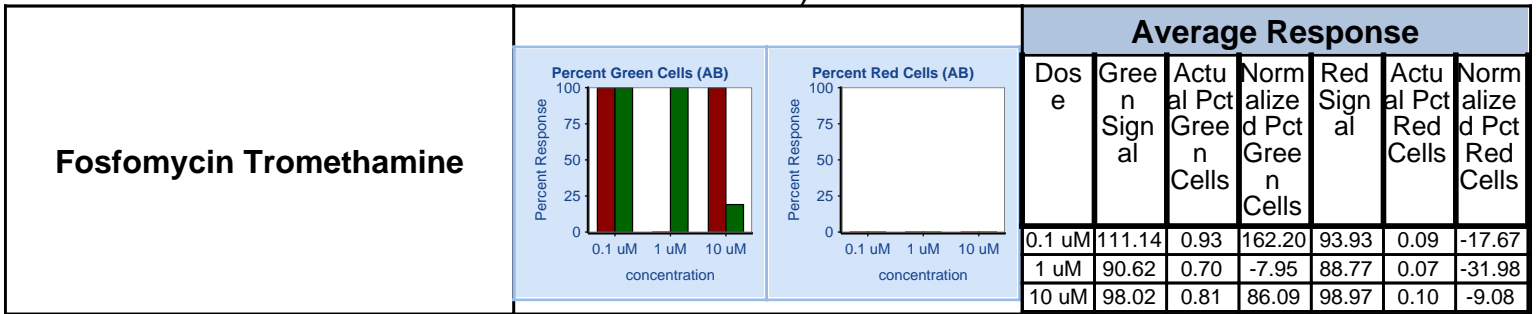

Compound

Normalized Values (A and B Sets)

Responses

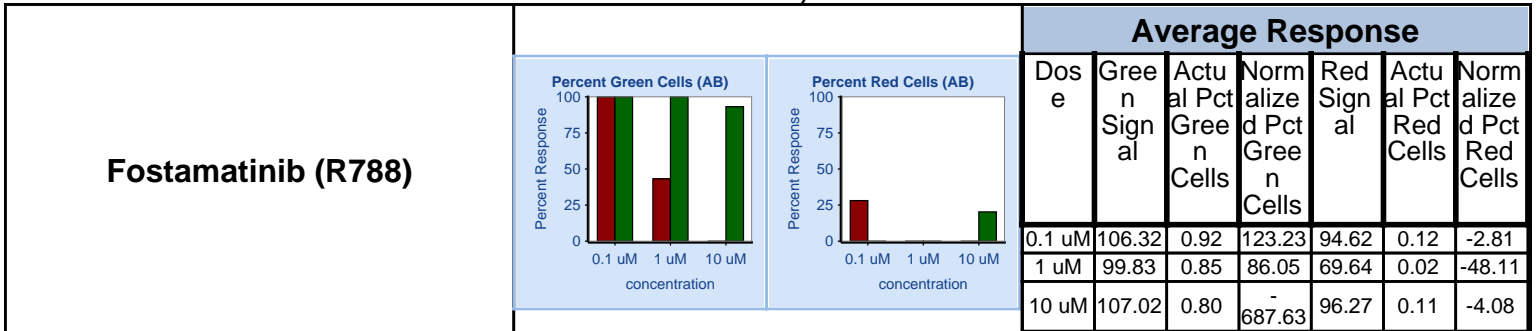

Compound

Normalized Values (A and B Sets)

Responses

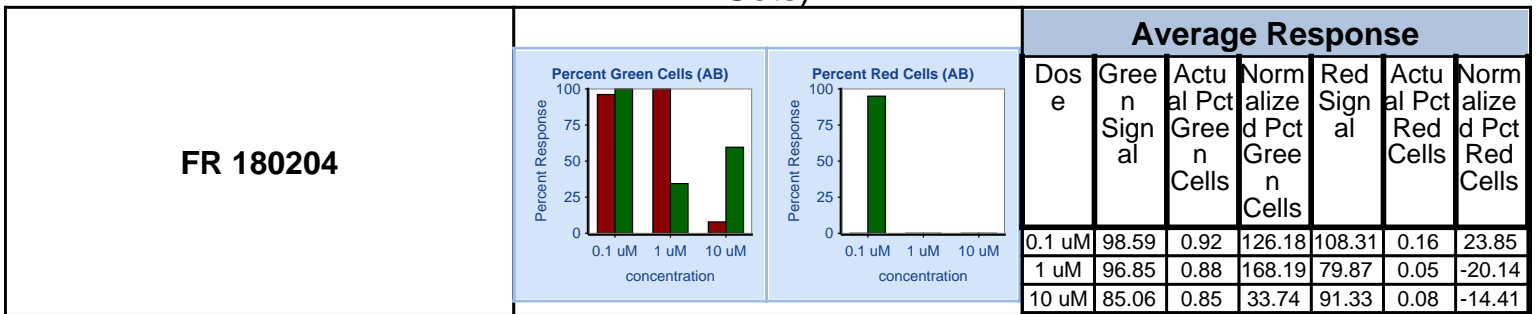

Compound

Normalized Values (A and B Sets)

Responses

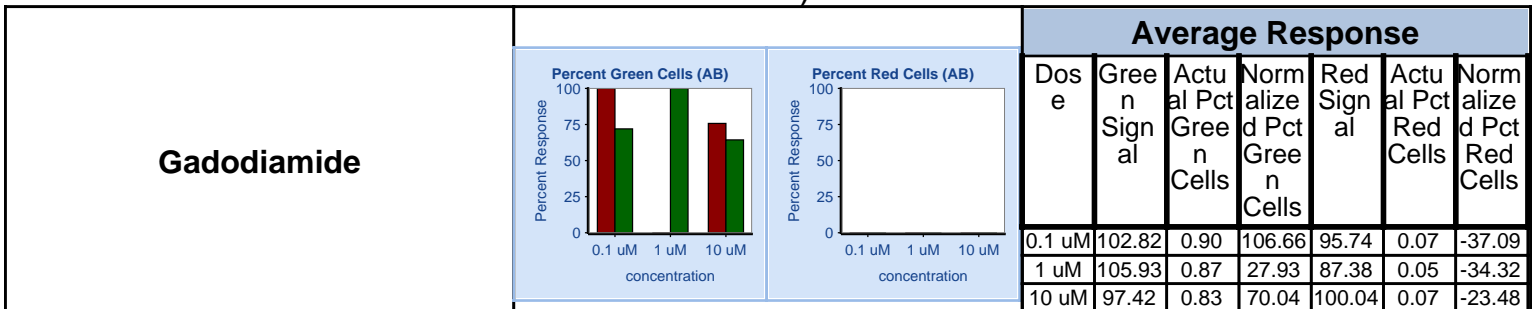

Compound

Normalized Values (A and B Sets)

Responses

| Galeterone |        |      | Average Response |              |                        |                            |            |                      |                          |
|------------|--------|------|------------------|--------------|------------------------|----------------------------|------------|----------------------|--------------------------|
|            |        |      | Dose             | Green Signal | Actual Pct Green Cells | Normalized Pct Green Cells | Red Signal | Actual Pct Red Cells | Normalized Pct Red Cells |
|            |        |      | 0.1 uM           | 105.50       | 0.92                   | 126.00                     | 92.12      | 0.08                 | -17.03                   |
|            |        |      | 1 uM             | 105.14       | 0.88                   | 96.95                      | 95.37      | 0.09                 | -17.79                   |
| 10 uM      | 102.82 | 0.91 | -17.09           | 86.11        | 0.05                   | -35.37                     |            |                      |                          |

Compound

Normalized Values (A and B Sets)

Responses

| Ganetespib (STA-9090) |       |      | Average Response |              |                        |                            |            |                      |                          |
|-----------------------|-------|------|------------------|--------------|------------------------|----------------------------|------------|----------------------|--------------------------|
|                       |       |      | Dose             | Green Signal | Actual Pct Green Cells | Normalized Pct Green Cells | Red Signal | Actual Pct Red Cells | Normalized Pct Red Cells |
|                       |       |      | 0.1 uM           | 117.27       | 0.88                   | 68.31                      | 113.45     | 0.16                 | 21.38                    |
|                       |       |      | 1 uM             | 96.42        | 0.80                   | 32.47                      | 103.18     | 0.10                 | -9.64                    |
| 10 uM                 | 99.62 | 0.77 | 28.53            | 123.76       | 0.15                   | 12.33                      |            |                      |                          |

Compound

Normalized Values (A and B Sets)

Responses

| GANT 61 |       |      | Average Response |              |                        |                            |            |                      |                          |
|---------|-------|------|------------------|--------------|------------------------|----------------------------|------------|----------------------|--------------------------|
|         |       |      | Dose             | Green Signal | Actual Pct Green Cells | Normalized Pct Green Cells | Red Signal | Actual Pct Red Cells | Normalized Pct Red Cells |
|         |       |      | 0.1 uM           | 90.45        | 0.85                   | 71.43                      | 74.18      | 0.02                 | -62.95                   |
|         |       |      | 1 uM             | 92.53        | 0.81                   | 79.39                      | 92.47      | 0.10                 | 13.08                    |
| 10 uM   | 89.18 | 0.86 | 51.34            | 69.77        | 0.04                   | -34.71                     |            |                      |                          |

Compound

Normalized Values (A and B Sets)

Responses

| Gastrodin |       |      | Average Response |              |                        |                            |            |                      |                          |
|-----------|-------|------|------------------|--------------|------------------------|----------------------------|------------|----------------------|--------------------------|
|           |       |      | Dose             | Green Signal | Actual Pct Green Cells | Normalized Pct Green Cells | Red Signal | Actual Pct Red Cells | Normalized Pct Red Cells |
|           |       |      | 0.1 uM           | 98.93        | 0.92                   | 121.13                     | 82.34      | 0.05                 | -34.04                   |
|           |       |      | 1 uM             | 106.10       | 0.84                   | 67.70                      | 86.78      | 0.08                 | -18.57                   |
| 10 uM     | 94.17 | 0.88 | 136.39           | 76.76        | 0.03                   | -44.48                     |            |                      |                          |

Compound

Normalized Values (A and B Sets)

Responses

| GDC-0068 |       |      | Average Response |              |                        |                            |            |                      |                          |
|----------|-------|------|------------------|--------------|------------------------|----------------------------|------------|----------------------|--------------------------|
|          |       |      | Dose             | Green Signal | Actual Pct Green Cells | Normalized Pct Green Cells | Red Signal | Actual Pct Red Cells | Normalized Pct Red Cells |
|          |       |      | 0.1 uM           | 105.04       | 0.93                   | 146.55                     | 113.05     | 0.15                 | 18.44                    |
|          |       |      | 1 uM             | 92.63        | 0.81                   | 57.43                      | 95.85      | 0.09                 | -16.95                   |
| 10 uM    | 95.02 | 0.90 | 341.81           | 75.40        | 0.03                   | -45.23                     |            |                      |                          |

Compound

Normalized Values (A and B Sets)

Responses

| <b>GDC-0152</b> |        | Average Response |              |                        |                            |            |                      |                          |
|-----------------|--------|------------------|--------------|------------------------|----------------------------|------------|----------------------|--------------------------|
|                 |        | Dose             | Green Signal | Actual Pct Green Cells | Normalized Pct Green Cells | Red Signal | Actual Pct Red Cells | Normalized Pct Red Cells |
|                 |        | 0.1 uM           | 113.31       | 0.90                   | 109.64                     | 101.80     | 0.14                 | 8.50                     |
|                 |        | 1 uM             | 123.08       | 0.91                   | -75.22                     | 120.25     | 0.24                 | 71.49                    |
| 10 uM           | 127.99 | 0.95             | 126.57       | 130.87                 | 0.33                       | 93.99      |                      |                          |

Compound

Normalized Values (A and B Sets)

Responses

| <b>GDC-0349</b> |       | Average Response |              |                        |                            |            |                      |                          |
|-----------------|-------|------------------|--------------|------------------------|----------------------------|------------|----------------------|--------------------------|
|                 |       | Dose             | Green Signal | Actual Pct Green Cells | Normalized Pct Green Cells | Red Signal | Actual Pct Red Cells | Normalized Pct Red Cells |
|                 |       | 0.1 uM           | 101.84       | 0.91                   | 123.20                     | 88.31      | 0.08                 | -27.48                   |
|                 |       | 1 uM             | 90.00        | 0.86                   | 140.49                     | 62.23      | 0.01                 | -44.78                   |
| 10 uM           | 88.18 | 0.90             | 84.44        | 92.42                  | 0.08                       | -15.82     |                      |                          |

Compound

Normalized Values (A and B Sets)

Responses

| <b>GDC-0879</b> |       | Average Response |              |                        |                            |            |                      |                          |
|-----------------|-------|------------------|--------------|------------------------|----------------------------|------------|----------------------|--------------------------|
|                 |       | Dose             | Green Signal | Actual Pct Green Cells | Normalized Pct Green Cells | Red Signal | Actual Pct Red Cells | Normalized Pct Red Cells |
|                 |       | 0.1 uM           | 86.34        | 0.79                   | -2.73                      | 72.69      | 0.02                 | -63.48                   |
|                 |       | 1 uM             | 91.57        | 0.81                   | 4.22                       | 67.01      | 0.01                 | -50.78                   |
| 10 uM           | 87.56 | 0.82             | 61.81        | 86.95                  | 0.02                       | -46.25     |                      |                          |

Compound

Normalized Values (A and B Sets)

Responses

| <b>GDC-0980 (RG7422)</b> |        | Average Response |              |                        |                            |            |                      |                          |
|--------------------------|--------|------------------|--------------|------------------------|----------------------------|------------|----------------------|--------------------------|
|                          |        | Dose             | Green Signal | Actual Pct Green Cells | Normalized Pct Green Cells | Red Signal | Actual Pct Red Cells | Normalized Pct Red Cells |
|                          |        | 0.1 uM           | 94.02        | 0.88                   | 85.60                      | 102.54     | 0.12                 | 3.50                     |
|                          |        | 1 uM             | 104.21       | 0.91                   | 112.14                     | 90.28      | 0.06                 | -28.55                   |
| 10 uM                    | 114.50 | 0.98             | 474.69       | 110.29                 | 0.12                       | -2.21      |                      |                          |

Compound

Normalized Values (A and B Sets)

Responses

| <b>Gefitinib (ZD1839)</b> |       | Average Response |              |                        |                            |            |                      |                          |
|---------------------------|-------|------------------|--------------|------------------------|----------------------------|------------|----------------------|--------------------------|
|                           |       | Dose             | Green Signal | Actual Pct Green Cells | Normalized Pct Green Cells | Red Signal | Actual Pct Red Cells | Normalized Pct Red Cells |
|                           |       | 0.1 uM           | 91.28        | 0.84                   | 62.35                      | 67.41      | 0.01                 | -67.89                   |
| 1 uM                      | 53.94 | 0.30             | 2445.50      | 62.22                  | 0.01                       | -44.27     |                      |                          |



| Compound                | Normalized Values (A and B Sets) | Responses                                |              |                        |                            |            |                      |                          |
|-------------------------|----------------------------------|------------------------------------------|--------------|------------------------|----------------------------|------------|----------------------|--------------------------|
|                         |                                  | 10 uM 85.54 0.88 64.46 64.85 0.01 -47.25 |              |                        |                            |            |                      |                          |
| Compound                | Normalized Values (A and B Sets) | Responses                                |              |                        |                            |            |                      |                          |
| <b>Geldanamycin</b>     |                                  | Average Response                         |              |                        |                            |            |                      |                          |
|                         |                                  | Dose                                     | Green Signal | Actual Pct Green Cells | Normalized Pct Green Cells | Red Signal | Actual Pct Red Cells | Normalized Pct Red Cells |
|                         |                                  | 0.1 uM                                   | 104.51       | 0.92                   | 130.69                     | 91.81      | 0.05                 | -42.25                   |
|                         |                                  | 1 uM                                     | 93.25        | 0.86                   | 267.19                     | 83.62      | 0.04                 | -26.98                   |
| 10 uM                   | 97.09                            | 0.84                                     | 34.38        | 78.55                  | 0.07                       | -19.41     |                      |                          |
| Compound                | Normalized Values (A and B Sets) | Responses                                |              |                        |                            |            |                      |                          |
| <b>Genipin</b>          |                                  | Average Response                         |              |                        |                            |            |                      |                          |
|                         |                                  | Dose                                     | Green Signal | Actual Pct Green Cells | Normalized Pct Green Cells | Red Signal | Actual Pct Red Cells | Normalized Pct Red Cells |
|                         |                                  | 0.1 uM                                   | 92.33        | 0.87                   | 74.21                      | 105.15     | 0.12                 | 4.43                     |
|                         |                                  | 1 uM                                     | 94.11        | 0.84                   | 65.95                      | 92.63      | 0.06                 | -29.28                   |
| 10 uM                   | 91.34                            | 0.86                                     | -17.11       | 0.14                   | 0.00                       | -58.71     |                      |                          |
| Compound                | Normalized Values (A and B Sets) | Responses                                |              |                        |                            |            |                      |                          |
| <b>Geniposide</b>       |                                  | Average Response                         |              |                        |                            |            |                      |                          |
|                         |                                  | Dose                                     | Green Signal | Actual Pct Green Cells | Normalized Pct Green Cells | Red Signal | Actual Pct Red Cells | Normalized Pct Red Cells |
|                         |                                  | 0.1 uM                                   | 89.37        | 0.83                   | 36.07                      | 81.30      | 0.05                 | -32.87                   |
|                         |                                  | 1 uM                                     | 75.06        | 0.55                   | 115.80                     | 62.99      | 0.01                 | -50.19                   |
| 10 uM                   | 105.67                           | 0.92                                     | 212.14       | 92.78                  | 0.07                       | -27.39     |                      |                          |
| Compound                | Normalized Values (A and B Sets) | Responses                                |              |                        |                            |            |                      |                          |
| <b>Geniposidic acid</b> |                                  | Average Response                         |              |                        |                            |            |                      |                          |
|                         |                                  | Dose                                     | Green Signal | Actual Pct Green Cells | Normalized Pct Green Cells | Red Signal | Actual Pct Red Cells | Normalized Pct Red Cells |
|                         |                                  | 0.1 uM                                   | 96.17        | 0.88                   | 81.80                      | 94.39      | 0.09                 | -14.58                   |
|                         |                                  | 1 uM                                     | 78.01        | 0.61                   | -46.46                     | 77.98      | 0.04                 | -37.75                   |
| 10 uM                   | 88.43                            | 0.84                                     | 187.67       | 109.25                 | 0.13                       | 5.01       |                      |                          |
| Compound                | Normalized Values (A and B Sets) | Responses                                |              |                        |                            |            |                      |                          |
| <b>Gestodene</b>        |                                  | Average Response                         |              |                        |                            |            |                      |                          |
|                         |                                  | Dose                                     | Green Signal | Actual Pct Red Cells   |                            |            |                      |                          |

Compound

Normalized Values (A and B Sets)

Responses

| Compound | Normalized Values (A and B Sets) |      | Average Response |              |                        |                            |            |                      |                          |
|----------|----------------------------------|------|------------------|--------------|------------------------|----------------------------|------------|----------------------|--------------------------|
|          |                                  |      | Dose             | Green Signal | Actual Pct Green Cells | Normalized Pct Green Cells | Red Signal | Actual Pct Red Cells | Normalized Pct Red Cells |
|          |                                  |      | 0.1 uM           | 85.54        | 0.73                   | 106.04                     | 92.43      | 0.06                 | -35.14                   |
|          |                                  |      | 1 uM             | 109.12       | 0.91                   | 126.58                     | 107.31     | 0.11                 | -5.56                    |
| 10 uM    | 104.50                           | 0.84 | 82.40            | 97.18        | 0.07                   | -24.19                     |            |                      |                          |

Compound

Normalized Values (A and B Sets)

Responses

| Gimeracil | Normalized Values (A and B Sets) |      | Average Response |              |                        |                            |            |                      |                          |
|-----------|----------------------------------|------|------------------|--------------|------------------------|----------------------------|------------|----------------------|--------------------------|
|           |                                  |      | Dose             | Green Signal | Actual Pct Green Cells | Normalized Pct Green Cells | Red Signal | Actual Pct Red Cells | Normalized Pct Red Cells |
|           |                                  |      | 0.1 uM           | 109.59       | 0.92                   | 126.13                     | 80.04      | 0.03                 | -56.36                   |
|           |                                  |      | 1 uM             | 91.59        | 0.81                   | 13.64                      | 88.80      | 0.05                 | -35.69                   |
| 10 uM     | 109.58                           | 0.88 | 103.34           | 102.76       | 0.07                   | -23.41                     |            |                      |                          |

Compound

Normalized Values (A and B Sets)

Responses

| Ginkgolide A | Normalized Values (A and B Sets) |      | Average Response |              |                        |                            |            |                      |                          |
|--------------|----------------------------------|------|------------------|--------------|------------------------|----------------------------|------------|----------------------|--------------------------|
|              |                                  |      | Dose             | Green Signal | Actual Pct Green Cells | Normalized Pct Green Cells | Red Signal | Actual Pct Red Cells | Normalized Pct Red Cells |
|              |                                  |      | 0.1 uM           | 95.21        | 0.84                   | 28.08                      | 88.79      | 0.06                 | -42.47                   |
|              |                                  |      | 1 uM             | 110.70       | 0.91                   | 120.20                     | 93.35      | 0.06                 | -27.80                   |
| 10 uM        | 104.53                           | 0.87 | 94.29            | 100.25       | 0.06                   | -26.76                     |            |                      |                          |

Compound

Normalized Values (A and B Sets)

Responses

| Ginkgolide B | Normalized Values (A and B Sets) |      | Average Response |              |                        |                            |            |                      |                          |
|--------------|----------------------------------|------|------------------|--------------|------------------------|----------------------------|------------|----------------------|--------------------------|
|              |                                  |      | Dose             | Green Signal | Actual Pct Green Cells | Normalized Pct Green Cells | Red Signal | Actual Pct Red Cells | Normalized Pct Red Cells |
|              |                                  |      | 0.1 uM           | 91.42        | 0.85                   | 77.61                      | 74.74      | 0.01                 | -66.44                   |
|              |                                  |      | 1 uM             | 98.28        | 0.82                   | 43.98                      | 98.98      | 0.08                 | -19.55                   |
| 10 uM        | 98.27                            | 0.85 | 81.46            | 88.49        | 0.02                   | -43.41                     |            |                      |                          |

Compound

Normalized Values (A and B Sets)

Responses

| Givinostat (ITF2357) | Normalized Values (A and B Sets) |      | Average Response |              |                        |                            |            |                      |                          |
|----------------------|----------------------------------|------|------------------|--------------|------------------------|----------------------------|------------|----------------------|--------------------------|
|                      |                                  |      | Dose             | Green Signal | Actual Pct Green Cells | Normalized Pct Green Cells | Red Signal | Actual Pct Red Cells | Normalized Pct Red Cells |
|                      |                                  |      | 0.1 uM           | 79.07        | 0.75                   | -53.97                     | 74.57      | 0.03                 | -40.31                   |
|                      |                                  |      | 1 uM             | 104.77       | 0.81                   | 53.30                      | 99.88      | 0.10                 | -12.82                   |
| 10 uM                | 110.37                           | 0.90 | 269.26           | 90.83        | 0.05                   | -36.31                     |            |                      |                          |

| Compound                 | Normalized Values (A and B Sets) | Responses                                                                                                                                                                                                                                                                                                                                                                                                                                                                                                                                                                                                                                                                     |                  |                        |                            |            |                      |                          |  |      |              |                        |                            |            |                      |                          |        |       |      |       |       |      |       |      |       |      |        |       |      |       |       |       |      |       |       |      |        |
|--------------------------|----------------------------------|-------------------------------------------------------------------------------------------------------------------------------------------------------------------------------------------------------------------------------------------------------------------------------------------------------------------------------------------------------------------------------------------------------------------------------------------------------------------------------------------------------------------------------------------------------------------------------------------------------------------------------------------------------------------------------|------------------|------------------------|----------------------------|------------|----------------------|--------------------------|--|------|--------------|------------------------|----------------------------|------------|----------------------|--------------------------|--------|-------|------|-------|-------|------|-------|------|-------|------|--------|-------|------|-------|-------|-------|------|-------|-------|------|--------|
| <b>Glycyrrhizic Acid</b> |                                  | <table border="1"> <thead> <tr> <th colspan="7">Average Response</th> </tr> <tr> <th>Dose</th> <th>Green Signal</th> <th>Actual Pct Green Cells</th> <th>Normalized Pct Green Cells</th> <th>Red Signal</th> <th>Actual Pct Red Cells</th> <th>Normalized Pct Red Cells</th> </tr> </thead> <tbody> <tr> <td>0.1 uM</td> <td>99.81</td> <td>0.89</td> <td>96.66</td> <td>96.51</td> <td>0.11</td> <td>-7.46</td> </tr> <tr> <td>1 uM</td> <td>89.21</td> <td>0.75</td> <td>819.22</td> <td>98.43</td> <td>0.14</td> <td>36.82</td> </tr> <tr> <td>10 uM</td> <td>91.37</td> <td>0.87</td> <td>55.43</td> <td>72.25</td> <td>0.03</td> <td>-35.90</td> </tr> </tbody> </table> | Average Response |                        |                            |            |                      |                          |  | Dose | Green Signal | Actual Pct Green Cells | Normalized Pct Green Cells | Red Signal | Actual Pct Red Cells | Normalized Pct Red Cells | 0.1 uM | 99.81 | 0.89 | 96.66 | 96.51 | 0.11 | -7.46 | 1 uM | 89.21 | 0.75 | 819.22 | 98.43 | 0.14 | 36.82 | 10 uM | 91.37 | 0.87 | 55.43 | 72.25 | 0.03 | -35.90 |
|                          |                                  | Average Response                                                                                                                                                                                                                                                                                                                                                                                                                                                                                                                                                                                                                                                              |                  |                        |                            |            |                      |                          |  |      |              |                        |                            |            |                      |                          |        |       |      |       |       |      |       |      |       |      |        |       |      |       |       |       |      |       |       |      |        |
|                          |                                  | Dose                                                                                                                                                                                                                                                                                                                                                                                                                                                                                                                                                                                                                                                                          | Green Signal     | Actual Pct Green Cells | Normalized Pct Green Cells | Red Signal | Actual Pct Red Cells | Normalized Pct Red Cells |  |      |              |                        |                            |            |                      |                          |        |       |      |       |       |      |       |      |       |      |        |       |      |       |       |       |      |       |       |      |        |
|                          |                                  | 0.1 uM                                                                                                                                                                                                                                                                                                                                                                                                                                                                                                                                                                                                                                                                        | 99.81            | 0.89                   | 96.66                      | 96.51      | 0.11                 | -7.46                    |  |      |              |                        |                            |            |                      |                          |        |       |      |       |       |      |       |      |       |      |        |       |      |       |       |       |      |       |       |      |        |
| 1 uM                     | 89.21                            | 0.75                                                                                                                                                                                                                                                                                                                                                                                                                                                                                                                                                                                                                                                                          | 819.22           | 98.43                  | 0.14                       | 36.82      |                      |                          |  |      |              |                        |                            |            |                      |                          |        |       |      |       |       |      |       |      |       |      |        |       |      |       |       |       |      |       |       |      |        |
| 10 uM                    | 91.37                            | 0.87                                                                                                                                                                                                                                                                                                                                                                                                                                                                                                                                                                                                                                                                          | 55.43            | 72.25                  | 0.03                       | -35.90     |                      |                          |  |      |              |                        |                            |            |                      |                          |        |       |      |       |       |      |       |      |       |      |        |       |      |       |       |       |      |       |       |      |        |

| Compound           | Normalized Values (A and B Sets) | Responses                                                                                                                                                                                                                                                                                                                                                                                                                                                                                                                                                                                                                                                                       |                  |                        |                            |            |                      |                          |  |      |              |                        |                            |            |                      |                          |        |        |      |       |       |      |        |      |       |      |       |       |      |        |       |       |      |       |        |      |       |
|--------------------|----------------------------------|---------------------------------------------------------------------------------------------------------------------------------------------------------------------------------------------------------------------------------------------------------------------------------------------------------------------------------------------------------------------------------------------------------------------------------------------------------------------------------------------------------------------------------------------------------------------------------------------------------------------------------------------------------------------------------|------------------|------------------------|----------------------------|------------|----------------------|--------------------------|--|------|--------------|------------------------|----------------------------|------------|----------------------|--------------------------|--------|--------|------|-------|-------|------|--------|------|-------|------|-------|-------|------|--------|-------|-------|------|-------|--------|------|-------|
| <b>Golgicide A</b> |                                  | <table border="1"> <thead> <tr> <th colspan="7">Average Response</th> </tr> <tr> <th>Dose</th> <th>Green Signal</th> <th>Actual Pct Green Cells</th> <th>Normalized Pct Green Cells</th> <th>Red Signal</th> <th>Actual Pct Red Cells</th> <th>Normalized Pct Red Cells</th> </tr> </thead> <tbody> <tr> <td>0.1 uM</td> <td>101.21</td> <td>0.88</td> <td>89.94</td> <td>76.89</td> <td>0.02</td> <td>-62.33</td> </tr> <tr> <td>1 uM</td> <td>88.10</td> <td>0.77</td> <td>76.80</td> <td>64.79</td> <td>0.01</td> <td>-41.51</td> </tr> <tr> <td>10 uM</td> <td>88.53</td> <td>0.80</td> <td>-3.85</td> <td>120.25</td> <td>0.18</td> <td>27.00</td> </tr> </tbody> </table> | Average Response |                        |                            |            |                      |                          |  | Dose | Green Signal | Actual Pct Green Cells | Normalized Pct Green Cells | Red Signal | Actual Pct Red Cells | Normalized Pct Red Cells | 0.1 uM | 101.21 | 0.88 | 89.94 | 76.89 | 0.02 | -62.33 | 1 uM | 88.10 | 0.77 | 76.80 | 64.79 | 0.01 | -41.51 | 10 uM | 88.53 | 0.80 | -3.85 | 120.25 | 0.18 | 27.00 |
|                    |                                  | Average Response                                                                                                                                                                                                                                                                                                                                                                                                                                                                                                                                                                                                                                                                |                  |                        |                            |            |                      |                          |  |      |              |                        |                            |            |                      |                          |        |        |      |       |       |      |        |      |       |      |       |       |      |        |       |       |      |       |        |      |       |
|                    |                                  | Dose                                                                                                                                                                                                                                                                                                                                                                                                                                                                                                                                                                                                                                                                            | Green Signal     | Actual Pct Green Cells | Normalized Pct Green Cells | Red Signal | Actual Pct Red Cells | Normalized Pct Red Cells |  |      |              |                        |                            |            |                      |                          |        |        |      |       |       |      |        |      |       |      |       |       |      |        |       |       |      |       |        |      |       |
|                    |                                  | 0.1 uM                                                                                                                                                                                                                                                                                                                                                                                                                                                                                                                                                                                                                                                                          | 101.21           | 0.88                   | 89.94                      | 76.89      | 0.02                 | -62.33                   |  |      |              |                        |                            |            |                      |                          |        |        |      |       |       |      |        |      |       |      |       |       |      |        |       |       |      |       |        |      |       |
| 1 uM               | 88.10                            | 0.77                                                                                                                                                                                                                                                                                                                                                                                                                                                                                                                                                                                                                                                                            | 76.80            | 64.79                  | 0.01                       | -41.51     |                      |                          |  |      |              |                        |                            |            |                      |                          |        |        |      |       |       |      |        |      |       |      |       |       |      |        |       |       |      |       |        |      |       |
| 10 uM              | 88.53                            | 0.80                                                                                                                                                                                                                                                                                                                                                                                                                                                                                                                                                                                                                                                                            | -3.85            | 120.25                 | 0.18                       | 27.00      |                      |                          |  |      |              |                        |                            |            |                      |                          |        |        |      |       |       |      |        |      |       |      |       |       |      |        |       |       |      |       |        |      |       |

| Compound                  | Normalized Values (A and B Sets) | Responses                                                                                                                                                                                                                                                                                                                                                                                                                                                                                                                                                                                                                                                                         |                  |                        |                            |            |                      |                          |  |      |              |                        |                            |            |                      |                          |        |       |      |       |        |      |        |      |       |      |        |       |      |        |       |        |      |        |        |      |      |
|---------------------------|----------------------------------|-----------------------------------------------------------------------------------------------------------------------------------------------------------------------------------------------------------------------------------------------------------------------------------------------------------------------------------------------------------------------------------------------------------------------------------------------------------------------------------------------------------------------------------------------------------------------------------------------------------------------------------------------------------------------------------|------------------|------------------------|----------------------------|------------|----------------------|--------------------------|--|------|--------------|------------------------|----------------------------|------------|----------------------|--------------------------|--------|-------|------|-------|--------|------|--------|------|-------|------|--------|-------|------|--------|-------|--------|------|--------|--------|------|------|
| <b>Golvatinib (E7050)</b> |                                  | <table border="1"> <thead> <tr> <th colspan="7">Average Response</th> </tr> <tr> <th>Dose</th> <th>Green Signal</th> <th>Actual Pct Green Cells</th> <th>Normalized Pct Green Cells</th> <th>Red Signal</th> <th>Actual Pct Red Cells</th> <th>Normalized Pct Red Cells</th> </tr> </thead> <tbody> <tr> <td>0.1 uM</td> <td>94.07</td> <td>0.87</td> <td>83.79</td> <td>100.34</td> <td>0.09</td> <td>-19.35</td> </tr> <tr> <td>1 uM</td> <td>88.43</td> <td>0.83</td> <td>319.92</td> <td>72.36</td> <td>0.02</td> <td>-36.25</td> </tr> <tr> <td>10 uM</td> <td>125.03</td> <td>0.97</td> <td>150.00</td> <td>105.40</td> <td>0.14</td> <td>9.83</td> </tr> </tbody> </table> | Average Response |                        |                            |            |                      |                          |  | Dose | Green Signal | Actual Pct Green Cells | Normalized Pct Green Cells | Red Signal | Actual Pct Red Cells | Normalized Pct Red Cells | 0.1 uM | 94.07 | 0.87 | 83.79 | 100.34 | 0.09 | -19.35 | 1 uM | 88.43 | 0.83 | 319.92 | 72.36 | 0.02 | -36.25 | 10 uM | 125.03 | 0.97 | 150.00 | 105.40 | 0.14 | 9.83 |
|                           |                                  | Average Response                                                                                                                                                                                                                                                                                                                                                                                                                                                                                                                                                                                                                                                                  |                  |                        |                            |            |                      |                          |  |      |              |                        |                            |            |                      |                          |        |       |      |       |        |      |        |      |       |      |        |       |      |        |       |        |      |        |        |      |      |
|                           |                                  | Dose                                                                                                                                                                                                                                                                                                                                                                                                                                                                                                                                                                                                                                                                              | Green Signal     | Actual Pct Green Cells | Normalized Pct Green Cells | Red Signal | Actual Pct Red Cells | Normalized Pct Red Cells |  |      |              |                        |                            |            |                      |                          |        |       |      |       |        |      |        |      |       |      |        |       |      |        |       |        |      |        |        |      |      |
|                           |                                  | 0.1 uM                                                                                                                                                                                                                                                                                                                                                                                                                                                                                                                                                                                                                                                                            | 94.07            | 0.87                   | 83.79                      | 100.34     | 0.09                 | -19.35                   |  |      |              |                        |                            |            |                      |                          |        |       |      |       |        |      |        |      |       |      |        |       |      |        |       |        |      |        |        |      |      |
| 1 uM                      | 88.43                            | 0.83                                                                                                                                                                                                                                                                                                                                                                                                                                                                                                                                                                                                                                                                              | 319.92           | 72.36                  | 0.02                       | -36.25     |                      |                          |  |      |              |                        |                            |            |                      |                          |        |       |      |       |        |      |        |      |       |      |        |       |      |        |       |        |      |        |        |      |      |
| 10 uM                     | 125.03                           | 0.97                                                                                                                                                                                                                                                                                                                                                                                                                                                                                                                                                                                                                                                                              | 150.00           | 105.40                 | 0.14                       | 9.83       |                      |                          |  |      |              |                        |                            |            |                      |                          |        |       |      |       |        |      |        |      |       |      |        |       |      |        |       |        |      |        |        |      |      |

| Compound       | Normalized Values (A and B Sets) | Responses                                                                                                                                                                                                                                                                                                                                                                                                                                                                                                                                                                                                                                                                           |                  |                        |                            |            |                      |                          |  |      |              |                        |                            |            |                      |                          |        |        |      |        |       |      |        |      |        |      |        |       |      |        |       |        |      |       |       |      |        |
|----------------|----------------------------------|-------------------------------------------------------------------------------------------------------------------------------------------------------------------------------------------------------------------------------------------------------------------------------------------------------------------------------------------------------------------------------------------------------------------------------------------------------------------------------------------------------------------------------------------------------------------------------------------------------------------------------------------------------------------------------------|------------------|------------------------|----------------------------|------------|----------------------|--------------------------|--|------|--------------|------------------------|----------------------------|------------|----------------------|--------------------------|--------|--------|------|--------|-------|------|--------|------|--------|------|--------|-------|------|--------|-------|--------|------|-------|-------|------|--------|
| <b>Gramine</b> |                                  | <table border="1"> <thead> <tr> <th colspan="7">Average Response</th> </tr> <tr> <th>Dose</th> <th>Green Signal</th> <th>Actual Pct Green Cells</th> <th>Normalized Pct Green Cells</th> <th>Red Signal</th> <th>Actual Pct Red Cells</th> <th>Normalized Pct Red Cells</th> </tr> </thead> <tbody> <tr> <td>0.1 uM</td> <td>100.16</td> <td>0.89</td> <td>107.22</td> <td>71.95</td> <td>0.01</td> <td>-70.78</td> </tr> <tr> <td>1 uM</td> <td>101.20</td> <td>0.91</td> <td>238.57</td> <td>95.51</td> <td>0.10</td> <td>-11.74</td> </tr> <tr> <td>10 uM</td> <td>101.69</td> <td>0.90</td> <td>86.94</td> <td>87.57</td> <td>0.08</td> <td>-15.52</td> </tr> </tbody> </table> | Average Response |                        |                            |            |                      |                          |  | Dose | Green Signal | Actual Pct Green Cells | Normalized Pct Green Cells | Red Signal | Actual Pct Red Cells | Normalized Pct Red Cells | 0.1 uM | 100.16 | 0.89 | 107.22 | 71.95 | 0.01 | -70.78 | 1 uM | 101.20 | 0.91 | 238.57 | 95.51 | 0.10 | -11.74 | 10 uM | 101.69 | 0.90 | 86.94 | 87.57 | 0.08 | -15.52 |
|                |                                  | Average Response                                                                                                                                                                                                                                                                                                                                                                                                                                                                                                                                                                                                                                                                    |                  |                        |                            |            |                      |                          |  |      |              |                        |                            |            |                      |                          |        |        |      |        |       |      |        |      |        |      |        |       |      |        |       |        |      |       |       |      |        |
|                |                                  | Dose                                                                                                                                                                                                                                                                                                                                                                                                                                                                                                                                                                                                                                                                                | Green Signal     | Actual Pct Green Cells | Normalized Pct Green Cells | Red Signal | Actual Pct Red Cells | Normalized Pct Red Cells |  |      |              |                        |                            |            |                      |                          |        |        |      |        |       |      |        |      |        |      |        |       |      |        |       |        |      |       |       |      |        |
|                |                                  | 0.1 uM                                                                                                                                                                                                                                                                                                                                                                                                                                                                                                                                                                                                                                                                              | 100.16           | 0.89                   | 107.22                     | 71.95      | 0.01                 | -70.78                   |  |      |              |                        |                            |            |                      |                          |        |        |      |        |       |      |        |      |        |      |        |       |      |        |       |        |      |       |       |      |        |
| 1 uM           | 101.20                           | 0.91                                                                                                                                                                                                                                                                                                                                                                                                                                                                                                                                                                                                                                                                                | 238.57           | 95.51                  | 0.10                       | -11.74     |                      |                          |  |      |              |                        |                            |            |                      |                          |        |        |      |        |       |      |        |      |        |      |        |       |      |        |       |        |      |       |       |      |        |
| 10 uM          | 101.69                           | 0.90                                                                                                                                                                                                                                                                                                                                                                                                                                                                                                                                                                                                                                                                                | 86.94            | 87.57                  | 0.08                       | -15.52     |                      |                          |  |      |              |                        |                            |            |                      |                          |        |        |      |        |       |      |        |      |        |      |        |       |      |        |       |        |      |       |       |      |        |

| Compound               | Normalized Values (A and B Sets) | Responses                                                                                                                                                                                                                                                                                                                                                                                                                                                                                                                                                                                                                                                                        |                  |                        |                            |            |                      |                          |  |      |              |                        |                            |            |                      |                          |        |        |      |        |       |      |        |      |       |      |       |       |      |        |       |       |      |       |       |      |        |
|------------------------|----------------------------------|----------------------------------------------------------------------------------------------------------------------------------------------------------------------------------------------------------------------------------------------------------------------------------------------------------------------------------------------------------------------------------------------------------------------------------------------------------------------------------------------------------------------------------------------------------------------------------------------------------------------------------------------------------------------------------|------------------|------------------------|----------------------------|------------|----------------------|--------------------------|--|------|--------------|------------------------|----------------------------|------------|----------------------|--------------------------|--------|--------|------|--------|-------|------|--------|------|-------|------|-------|-------|------|--------|-------|-------|------|-------|-------|------|--------|
| <b>Granisetron HCl</b> |                                  | <table border="1"> <thead> <tr> <th colspan="7">Average Response</th> </tr> <tr> <th>Dose</th> <th>Green Signal</th> <th>Actual Pct Green Cells</th> <th>Normalized Pct Green Cells</th> <th>Red Signal</th> <th>Actual Pct Red Cells</th> <th>Normalized Pct Red Cells</th> </tr> </thead> <tbody> <tr> <td>0.1 uM</td> <td>103.60</td> <td>0.94</td> <td>142.51</td> <td>88.94</td> <td>0.05</td> <td>-44.93</td> </tr> <tr> <td>1 uM</td> <td>95.80</td> <td>0.83</td> <td>74.16</td> <td>78.53</td> <td>0.02</td> <td>-47.11</td> </tr> <tr> <td>10 uM</td> <td>88.73</td> <td>0.79</td> <td>45.96</td> <td>86.77</td> <td>0.03</td> <td>-43.08</td> </tr> </tbody> </table> | Average Response |                        |                            |            |                      |                          |  | Dose | Green Signal | Actual Pct Green Cells | Normalized Pct Green Cells | Red Signal | Actual Pct Red Cells | Normalized Pct Red Cells | 0.1 uM | 103.60 | 0.94 | 142.51 | 88.94 | 0.05 | -44.93 | 1 uM | 95.80 | 0.83 | 74.16 | 78.53 | 0.02 | -47.11 | 10 uM | 88.73 | 0.79 | 45.96 | 86.77 | 0.03 | -43.08 |
|                        |                                  | Average Response                                                                                                                                                                                                                                                                                                                                                                                                                                                                                                                                                                                                                                                                 |                  |                        |                            |            |                      |                          |  |      |              |                        |                            |            |                      |                          |        |        |      |        |       |      |        |      |       |      |       |       |      |        |       |       |      |       |       |      |        |
|                        |                                  | Dose                                                                                                                                                                                                                                                                                                                                                                                                                                                                                                                                                                                                                                                                             | Green Signal     | Actual Pct Green Cells | Normalized Pct Green Cells | Red Signal | Actual Pct Red Cells | Normalized Pct Red Cells |  |      |              |                        |                            |            |                      |                          |        |        |      |        |       |      |        |      |       |      |       |       |      |        |       |       |      |       |       |      |        |
|                        |                                  | 0.1 uM                                                                                                                                                                                                                                                                                                                                                                                                                                                                                                                                                                                                                                                                           | 103.60           | 0.94                   | 142.51                     | 88.94      | 0.05                 | -44.93                   |  |      |              |                        |                            |            |                      |                          |        |        |      |        |       |      |        |      |       |      |       |       |      |        |       |       |      |       |       |      |        |
| 1 uM                   | 95.80                            | 0.83                                                                                                                                                                                                                                                                                                                                                                                                                                                                                                                                                                                                                                                                             | 74.16            | 78.53                  | 0.02                       | -47.11     |                      |                          |  |      |              |                        |                            |            |                      |                          |        |        |      |        |       |      |        |      |       |      |       |       |      |        |       |       |      |       |       |      |        |
| 10 uM                  | 88.73                            | 0.79                                                                                                                                                                                                                                                                                                                                                                                                                                                                                                                                                                                                                                                                             | 45.96            | 86.77                  | 0.03                       | -43.08     |                      |                          |  |      |              |                        |                            |            |                      |                          |        |        |      |        |       |      |        |      |       |      |       |       |      |        |       |       |      |       |       |      |        |

Compound

Normalized Values (A and B Sets)

Responses

| GSK 3787 | Percent Green Cells (AB) |  | Percent Red Cells (AB) |  | Average Response |              |                        |                            |            |                      |                          |
|----------|--------------------------|--|------------------------|--|------------------|--------------|------------------------|----------------------------|------------|----------------------|--------------------------|
|          | Percent Response         |  | Percent Response       |  | Dose             | Green Signal | Actual Pct Green Cells | Normalized Pct Green Cells | Red Signal | Actual Pct Red Cells | Normalized Pct Red Cells |
|          | 100                      |  | 100                    |  | 0.1 uM           | 98.08        | 0.91                   | 117.79                     | 70.01      | 0.02                 | -64.81                   |
|          | 0                        |  | 0                      |  | 1 uM             | 99.04        | 0.91                   | 67.97                      | 57.12      | 0.01                 | -44.50                   |
|          | 0.1 uM                   |  | 0.1 uM                 |  | 10 uM            | 88.39        | 0.89                   | 69.84                      | 56.56      | 0.00                 | -49.50                   |

Compound

Normalized Values (A and B Sets)

Responses

| GSK 264220A | Percent Green Cells (AB) |  | Percent Red Cells (AB) |  | Average Response |              |                        |                            |            |                      |                          |
|-------------|--------------------------|--|------------------------|--|------------------|--------------|------------------------|----------------------------|------------|----------------------|--------------------------|
|             | Percent Response         |  | Percent Response       |  | Dose             | Green Signal | Actual Pct Green Cells | Normalized Pct Green Cells | Red Signal | Actual Pct Red Cells | Normalized Pct Red Cells |
|             | 100                      |  | 100                    |  | 0.1 uM           | 88.58        | 0.82                   | 34.61                      | 87.87      | 0.05                 | -46.05                   |
|             | 0                        |  | 0                      |  | 1 uM             | 93.42        | 0.81                   | 71.35                      | 82.04      | 0.05                 | -29.99                   |
|             | 0.1 uM                   |  | 0.1 uM                 |  | 10 uM            | 92.56        | 0.89                   | 75.31                      | 87.89      | 0.06                 | -24.53                   |

Compound

Normalized Values (A and B Sets)

Responses

| GSK 269962 | Percent Green Cells (AB) |  | Percent Red Cells (AB) |  | Average Response |              |                        |                            |            |                      |                          |
|------------|--------------------------|--|------------------------|--|------------------|--------------|------------------------|----------------------------|------------|----------------------|--------------------------|
|            | Percent Response         |  | Percent Response       |  | Dose             | Green Signal | Actual Pct Green Cells | Normalized Pct Green Cells | Red Signal | Actual Pct Red Cells | Normalized Pct Red Cells |
|            | 100                      |  | 100                    |  | 0.1 uM           | 110.02       | 0.92                   | 125.35                     | 88.93      | 0.07                 | -30.51                   |
|            | 0                        |  | 0                      |  | 1 uM             | 113.96       | 0.96                   | 331.22                     | 87.25      | 0.06                 | -11.26                   |
|            | 0.1 uM                   |  | 0.1 uM                 |  | 10 uM            | 92.39        | 0.80                   | -2.57                      | 79.13      | 0.04                 | -35.12                   |

Compound

Normalized Values (A and B Sets)

Responses

| GSK 650394 | Percent Green Cells (AB) |  | Percent Red Cells (AB) |  | Average Response |              |                        |                            |            |                      |                          |
|------------|--------------------------|--|------------------------|--|------------------|--------------|------------------------|----------------------------|------------|----------------------|--------------------------|
|            | Percent Response         |  | Percent Response       |  | Dose             | Green Signal | Actual Pct Green Cells | Normalized Pct Green Cells | Red Signal | Actual Pct Red Cells | Normalized Pct Red Cells |
|            | 100                      |  | 100                    |  | 0.1 uM           | 85.02        | 0.78                   | -0.33                      | 70.81      | 0.01                 | -66.88                   |
|            | 0                        |  | 0                      |  | 1 uM             | 97.33        | 0.88                   | 126.41                     | 103.42     | 0.14                 | 30.16                    |
|            | 0.1 uM                   |  | 0.1 uM                 |  | 10 uM            | 86.29        | 0.87                   | 61.95                      | 71.60      | 0.03                 | -39.36                   |

Compound

Normalized Values (A and B Sets)

Responses

| GSK J4 HCl | Percent Green Cells (AB) |  | Percent Red Cells (AB) |  | Average Response |              |                        |                            |            |                      |                          |
|------------|--------------------------|--|------------------------|--|------------------|--------------|------------------------|----------------------------|------------|----------------------|--------------------------|
|            | Percent Response         |  | Percent Response       |  | Dose             | Green Signal | Actual Pct Green Cells | Normalized Pct Green Cells | Red Signal | Actual Pct Red Cells | Normalized Pct Red Cells |
|            | 100                      |  | 100                    |  | 0.1 uM           | 102.40       | 0.90                   | 11.29                      | 96.56      | 0.14                 | 6.84                     |
|            | 0                        |  | 0                      |  | 1 uM             | 82.46        | 0.64                   | -71.53                     | 85.53      | 0.05                 | -43.37                   |
|            | 0.1 uM                   |  | 0.1 uM                 |  | 10 uM            | 104.17       | 0.76                   | -38.18                     | 109.20     | 0.17                 | 29.53                    |

Compound

Normalized Values (A and B Sets)

Responses

| GSK256066 | Percent Green Cells (AB) |  | Percent Red Cells (AB) |  | Average Response |              |                        |                            |            |                      |                          |
|-----------|--------------------------|--|------------------------|--|------------------|--------------|------------------------|----------------------------|------------|----------------------|--------------------------|
|           | Percent Response         |  | Percent Response       |  | Dose             | Green Signal | Actual Pct Green Cells | Normalized Pct Green Cells | Red Signal | Actual Pct Red Cells | Normalized Pct Red Cells |
|           | 100                      |  | 100                    |  | 0.1 uM           | 91.89        | 0.85                   | 45.16                      | 79.88      | 0.05                 | -32.67                   |
|           | 0                        |  | 0                      |  | 1 uM             | 91.44        | 0.82                   | 63.70                      | 87.35      | 0.06                 | -28.19                   |
|           | 0.1 uM                   |  | 0.1 uM                 |  | 10 uM            | 96.46        | 0.94                   | 420.67                     | 82.35      | 0.03                 | -45.55                   |

Compound

Normalized Values (A and B Sets)

Responses

| GSK429286A | Percent Green Cells (AB) |  | Percent Red Cells (AB) |  | Average Response |              |                        |                            |            |                      |                          |
|------------|--------------------------|--|------------------------|--|------------------|--------------|------------------------|----------------------------|------------|----------------------|--------------------------|
|            | Percent Response         |  | Percent Response       |  | Dose             | Green Signal | Actual Pct Green Cells | Normalized Pct Green Cells | Red Signal | Actual Pct Red Cells | Normalized Pct Red Cells |
|            | 100                      |  | 100                    |  | 0.1 uM           | 96.45        | 0.86                   | 69.95                      | 89.91      | 0.06                 | -35.16                   |
|            | 0                        |  | 0                      |  | 1 uM             | 114.99       | 0.90                   | 114.93                     | 107.45     | 0.11                 | -6.66                    |
|            | 0.1 uM                   |  | 0.1 uM                 |  | 10 uM            | 127.96       | 0.91                   | 126.00                     | 117.07     | 0.15                 | 9.03                     |

Compound

Normalized Values (A and B Sets)

Responses

| GSK461364 | Percent Green Cells (AB) |  | Percent Red Cells (AB) |  | Average Response |              |                        |                            |            |                      |                          |
|-----------|--------------------------|--|------------------------|--|------------------|--------------|------------------------|----------------------------|------------|----------------------|--------------------------|
|           | Percent Response         |  | Percent Response       |  | Dose             | Green Signal | Actual Pct Green Cells | Normalized Pct Green Cells | Red Signal | Actual Pct Red Cells | Normalized Pct Red Cells |
|           | 100                      |  | 100                    |  | 0.1 uM           | 105.77       | 0.89                   | 97.85                      | 89.00      | 0.07                 | -21.09                   |
|           | 0                        |  | 0                      |  | 1 uM             | 99.65        | 0.83                   | 68.47                      | 109.72     | 0.14                 | 6.68                     |
|           | 0.1 uM                   |  | 0.1 uM                 |  | 10 uM            | 110.97       | 0.96                   | 413.70                     | 75.44      | 0.04                 | -38.36                   |

Compound

Normalized Values (A and B Sets)

Responses

| GSK690693 | Percent Green Cells (AB) |  | Percent Red Cells (AB) |  | Average Response |              |                        |                            |            |                      |                          |
|-----------|--------------------------|--|------------------------|--|------------------|--------------|------------------------|----------------------------|------------|----------------------|--------------------------|
|           | Percent Response         |  | Percent Response       |  | Dose             | Green Signal | Actual Pct Green Cells | Normalized Pct Green Cells | Red Signal | Actual Pct Red Cells | Normalized Pct Red Cells |
|           | 100                      |  | 100                    |  | 0.1 uM           | 102.20       | 0.92                   | 127.65                     | 87.31      | 0.04                 | -54.03                   |
|           | 0                        |  | 0                      |  | 1 uM             | 85.86        | 0.72                   | -51.75                     | 78.63      | 0.03                 | -43.49                   |
|           | 0.1 uM                   |  | 0.1 uM                 |  | 10 uM            | 98.52        | 0.86                   | 87.21                      | 110.91     | 0.09                 | -16.84                   |

Compound

Normalized Values (A and B Sets)

Responses

| GSK837149A | Percent Green Cells (AB) |  | Percent Red Cells (AB) |  | Average Response |              |                        |                            |            |                      |                          |
|------------|--------------------------|--|------------------------|--|------------------|--------------|------------------------|----------------------------|------------|----------------------|--------------------------|
|            | Percent Response         |  | Percent Response       |  | Dose             | Green Signal | Actual Pct Green Cells | Normalized Pct Green Cells | Red Signal | Actual Pct Red Cells | Normalized Pct Red Cells |
|            | 100                      |  | 100                    |  | 0.1 uM           | 91.22        | 0.84                   | 56.74                      | 83.24      | 0.03                 | -57.02                   |
|            | 0                        |  | 0                      |  | 1 uM             | 84.92        | 0.77                   | 308.85                     | 68.20      | 0.01                 | -42.32                   |
|            | 0.1 uM                   |  | 0.1 uM                 |  | 10 uM            | 84.10        | 0.79                   | -15.13                     | 77.28      | 0.04                 | -33.61                   |

Compound

Normalized Values (A and B Sets)

Responses

| GSK923295 | Percent Green Cells (AB) |      | Percent Red Cells (AB) |        | Average Response |              |                        |                            |            |                      |                          |       |       |
|-----------|--------------------------|------|------------------------|--------|------------------|--------------|------------------------|----------------------------|------------|----------------------|--------------------------|-------|-------|
|           | Percent Response         |      | Percent Response       |        | Dose             | Green Signal | Actual Pct Green Cells | Normalized Pct Green Cells | Red Signal | Actual Pct Red Cells | Normalized Pct Red Cells |       |       |
|           | concentration            |      | concentration          |        | 0.1 uM           | 1 uM         | 10 uM                  | 0.1 uM                     | 1 uM       | 10 uM                | 0.1 uM                   | 1 uM  | 10 uM |
|           | 0.1 uM                   | 1 uM | 10 uM                  | 0.1 uM | 1 uM             | 10 uM        | 0.1 uM                 | 1 uM                       | 10 uM      | 0.1 uM               | 1 uM                     | 10 uM |       |
|           | 75                       | 100  | 20                     | 100    | 0.1 uM           | 94.82        | 0.73                   | 563.22                     | 103.70     | 0.17                 | 20.84                    |       |       |
|           |                          |      |                        |        | 1 uM             | 94.46        | 0.66                   | -40.40                     | 88.92      | 0.12                 | -3.96                    |       |       |
|           |                          |      |                        |        | 10 uM            | 116.06       | 0.90                   | 123.18                     | 108.91     | 0.19                 | 34.34                    |       |       |

Compound

Normalized Values (A and B Sets)

Responses

| GSK1059615 | Percent Green Cells (AB) |      | Percent Red Cells (AB) |        | Average Response |              |                        |                            |            |                      |                          |       |       |
|------------|--------------------------|------|------------------------|--------|------------------|--------------|------------------------|----------------------------|------------|----------------------|--------------------------|-------|-------|
|            | Percent Response         |      | Percent Response       |        | Dose             | Green Signal | Actual Pct Green Cells | Normalized Pct Green Cells | Red Signal | Actual Pct Red Cells | Normalized Pct Red Cells |       |       |
|            | concentration            |      | concentration          |        | 0.1 uM           | 1 uM         | 10 uM                  | 0.1 uM                     | 1 uM       | 10 uM                | 0.1 uM                   | 1 uM  | 10 uM |
|            | 0.1 uM                   | 1 uM | 10 uM                  | 0.1 uM | 1 uM             | 10 uM        | 0.1 uM                 | 1 uM                       | 10 uM      | 0.1 uM               | 1 uM                     | 10 uM |       |
|            | 75                       | 100  | 0                      | 0      | 0.1 uM           | 93.56        | 0.85                   | 62.93                      | 104.29     | 0.09                 | -25.15                   |       |       |
|            |                          |      |                        |        | 1 uM             | 89.10        | 0.79                   | -4.70                      | 75.55      | 0.02                 | -47.70                   |       |       |
|            |                          |      |                        |        | 10 uM            | 94.55        | 0.86                   | 88.05                      | 97.24      | 0.03                 | -40.66                   |       |       |

Compound

Normalized Values (A and B Sets)

Responses

| GSK1070916 | Percent Green Cells (AB) |      | Percent Red Cells (AB) |        | Average Response |              |                        |                            |            |                      |                          |       |       |
|------------|--------------------------|------|------------------------|--------|------------------|--------------|------------------------|----------------------------|------------|----------------------|--------------------------|-------|-------|
|            | Percent Response         |      | Percent Response       |        | Dose             | Green Signal | Actual Pct Green Cells | Normalized Pct Green Cells | Red Signal | Actual Pct Red Cells | Normalized Pct Red Cells |       |       |
|            | concentration            |      | concentration          |        | 0.1 uM           | 1 uM         | 10 uM                  | 0.1 uM                     | 1 uM       | 10 uM                | 0.1 uM                   | 1 uM  | 10 uM |
|            | 0.1 uM                   | 1 uM | 10 uM                  | 0.1 uM | 1 uM             | 10 uM        | 0.1 uM                 | 1 uM                       | 10 uM      | 0.1 uM               | 1 uM                     | 10 uM |       |
|            | 100                      | 100  | 50                     | 25     | 0.1 uM           | 98.21        | 0.83                   | 41.32                      | 114.32     | 0.19                 | 34.50                    |       |       |
|            |                          |      |                        |        | 1 uM             | 104.72       | 0.90                   | 98.50                      | 102.32     | 0.14                 | 5.05                     |       |       |
|            |                          |      |                        |        | 10 uM            | 95.03        | 0.70                   | 1419.71                    | 113.83     | 0.16                 | 19.48                    |       |       |

Compound

Normalized Values (A and B Sets)

Responses

| GSK1292263 | Percent Green Cells (AB) |      | Percent Red Cells (AB) |        | Average Response |              |                        |                            |            |                      |                          |       |       |
|------------|--------------------------|------|------------------------|--------|------------------|--------------|------------------------|----------------------------|------------|----------------------|--------------------------|-------|-------|
|            | Percent Response         |      | Percent Response       |        | Dose             | Green Signal | Actual Pct Green Cells | Normalized Pct Green Cells | Red Signal | Actual Pct Red Cells | Normalized Pct Red Cells |       |       |
|            | concentration            |      | concentration          |        | 0.1 uM           | 1 uM         | 10 uM                  | 0.1 uM                     | 1 uM       | 10 uM                | 0.1 uM                   | 1 uM  | 10 uM |
|            | 0.1 uM                   | 1 uM | 10 uM                  | 0.1 uM | 1 uM             | 10 uM        | 0.1 uM                 | 1 uM                       | 10 uM      | 0.1 uM               | 1 uM                     | 10 uM |       |
|            | 60                       | 100  | 0                      | 0      | 0.1 uM           | 77.34        | 0.72                   | -95.44                     | 75.87      | 0.04                 | -36.76                   |       |       |
|            |                          |      |                        |        | 1 uM             | 98.70        | 0.87                   | 87.27                      | 73.58      | 0.02                 | -48.50                   |       |       |
|            |                          |      |                        |        | 10 uM            | 108.01       | 0.96                   | 485.28                     | 71.11      | 0.02                 | -50.76                   |       |       |

Compound

Normalized Values (A and B Sets)

Responses

| GSK1838705A | Percent Green Cells (AB) |      | Percent Red Cells (AB) |        | Average Response |              |                        |                            |            |                      |                          |       |       |
|-------------|--------------------------|------|------------------------|--------|------------------|--------------|------------------------|----------------------------|------------|----------------------|--------------------------|-------|-------|
|             | Percent Response         |      | Percent Response       |        | Dose             | Green Signal | Actual Pct Green Cells | Normalized Pct Green Cells | Red Signal | Actual Pct Red Cells | Normalized Pct Red Cells |       |       |
|             | concentration            |      | concentration          |        | 0.1 uM           | 1 uM         | 10 uM                  | 0.1 uM                     | 1 uM       | 10 uM                | 0.1 uM                   | 1 uM  | 10 uM |
|             | 0.1 uM                   | 1 uM | 10 uM                  | 0.1 uM | 1 uM             | 10 uM        | 0.1 uM                 | 1 uM                       | 10 uM      | 0.1 uM               | 1 uM                     | 10 uM |       |
|             | 30                       | 100  | 0                      | 0      | 0.1 uM           | 93.77        | 0.82                   | 21.64                      | 84.00      | 0.07                 | -23.06                   |       |       |
|             |                          |      |                        |        | 1 uM             | 101.65       | 0.86                   | 86.06                      | 94.30      | 0.08                 | -17.97                   |       |       |





Compound

Normalized Values (A and B Sets)

Responses

| Compound | Normalized Values (A and B Sets) |      | Average Response |              |                        |                            |            |                      |                          |
|----------|----------------------------------|------|------------------|--------------|------------------------|----------------------------|------------|----------------------|--------------------------|
|          |                                  |      | Dose             | Green Signal | Actual Pct Green Cells | Normalized Pct Green Cells | Red Signal | Actual Pct Red Cells | Normalized Pct Red Cells |
|          |                                  |      | 0.1 uM           | 89.58        | 0.84                   | 43.60                      | 86.52      | 0.08                 | -21.62                   |
|          |                                  |      | 1 uM             | 106.39       | 0.90                   | 102.80                     | 87.54      | 0.04                 | -37.23                   |
| 10 uM    | 99.40                            | 0.88 | 67.62            | 95.35        | 0.09                   | -14.34                     |            |                      |                          |

Compound

Normalized Values (A and B Sets)

Responses

| Compound | Normalized Values (A and B Sets) |      | Average Response |              |                        |                            |            |                      |                          |
|----------|----------------------------------|------|------------------|--------------|------------------------|----------------------------|------------|----------------------|--------------------------|
|          |                                  |      | Dose             | Green Signal | Actual Pct Green Cells | Normalized Pct Green Cells | Red Signal | Actual Pct Red Cells | Normalized Pct Red Cells |
|          |                                  |      | 0.1 uM           | 88.05        | 0.82                   | 38.68                      | 98.02      | 0.10                 | -12.92                   |
|          |                                  |      | 1 uM             | 102.09       | 0.92                   | 255.87                     | 82.17      | 0.07                 | -5.25                    |
| 10 uM    | 92.92                            | 0.90 | 82.56            | 86.31        | 0.04                   | -31.82                     |            |                      |                          |

Compound

Normalized Values (A and B Sets)

Responses

| Compound | Normalized Values (A and B Sets) |      | Average Response |              |                        |                            |            |                      |                          |
|----------|----------------------------------|------|------------------|--------------|------------------------|----------------------------|------------|----------------------|--------------------------|
|          |                                  |      | Dose             | Green Signal | Actual Pct Green Cells | Normalized Pct Green Cells | Red Signal | Actual Pct Red Cells | Normalized Pct Red Cells |
|          |                                  |      | 0.1 uM           | 96.04        | 0.88                   | 91.82                      | 83.69      | 0.04                 | -51.99                   |
|          |                                  |      | 1 uM             | 91.47        | 0.84                   | 179.27                     | 73.43      | 0.02                 | -39.31                   |
| 10 uM    | 85.83                            | 0.81 | -6.45            | 78.98        | 0.04                   | -34.01                     |            |                      |                          |

Compound

Normalized Values (A and B Sets)

Responses

| Compound | Normalized Values (A and B Sets) |      | Average Response |              |                        |                            |            |                      |                          |
|----------|----------------------------------|------|------------------|--------------|------------------------|----------------------------|------------|----------------------|--------------------------|
|          |                                  |      | Dose             | Green Signal | Actual Pct Green Cells | Normalized Pct Green Cells | Red Signal | Actual Pct Red Cells | Normalized Pct Red Cells |
|          |                                  |      | 0.1 uM           | 96.34        | 0.91                   | 116.87                     | 97.08      | 0.08                 | -18.09                   |
|          |                                  |      | 1 uM             | 98.45        | 0.87                   | 84.20                      | 95.79      | 0.08                 | -21.56                   |
| 10 uM    | 91.00                            | 0.87 | 259.17           | 80.23        | 0.03                   | -42.64                     |            |                      |                          |

Compound

Normalized Values (A and B Sets)

Responses

| Compound | Normalized Values (A and B Sets) |      | Average Response |              |                        |                            |            |                      |                          |
|----------|----------------------------------|------|------------------|--------------|------------------------|----------------------------|------------|----------------------|--------------------------|
|          |                                  |      | Dose             | Green Signal | Actual Pct Green Cells | Normalized Pct Green Cells | Red Signal | Actual Pct Red Cells | Normalized Pct Red Cells |
|          |                                  |      | 0.1 uM           | 99.95        | 0.92                   | 118.77                     | 102.43     | 0.16                 | 26.60                    |
|          |                                  |      | 1 uM             | 97.04        | 0.85                   | 70.87                      | 85.42      | 0.08                 | -20.04                   |
| 10 uM    | 98.21                            | 0.83 | 652.70           | 105.38       | 0.15                   | 10.68                      |            |                      |                          |

Compound

Normalized Values (A and B Sets)

Responses

| GW5074 | Percent Green Cells (AB) |  | Percent Red Cells (AB) |  | Average Response |              |                        |                            |            |                      |                          |
|--------|--------------------------|--|------------------------|--|------------------|--------------|------------------------|----------------------------|------------|----------------------|--------------------------|
|        | Percent Response         |  | Percent Response       |  | Dose             | Green Signal | Actual Pct Green Cells | Normalized Pct Green Cells | Red Signal | Actual Pct Red Cells | Normalized Pct Red Cells |
|        | 100                      |  | 100                    |  | 0.1 uM           | 96.19        | 0.92                   | 171.18                     | 82.24      | 0.04                 | -42.15                   |
|        | 0                        |  | 0                      |  | 1 uM             | 100.58       | 0.85                   | 89.77                      | 85.61      | 0.05                 | -43.58                   |
|        | 0.1 uM                   |  | 0.1 uM                 |  | 10 uM            | 77.54        | 0.61                   | -51.34                     | 98.67      | 0.09                 | -13.40                   |
|        | concentration            |  | concentration          |  |                  |              |                        |                            |            |                      |                          |

Compound

Normalized Values (A and B Sets)

Responses

| GW9508 | Percent Green Cells (AB) |  | Percent Red Cells (AB) |  | Average Response                                                                              |              |                        |                            |            |                      |                          |
|--------|--------------------------|--|------------------------|--|-----------------------------------------------------------------------------------------------|--------------|------------------------|----------------------------|------------|----------------------|--------------------------|
|        | Percent Response         |  | Percent Response       |  | Dose                                                                                          | Green Signal | Actual Pct Green Cells | Normalized Pct Green Cells | Red Signal | Actual Pct Red Cells | Normalized Pct Red Cells |
|        | 100                      |  | 100                    |  | 0.1 uM                                                                                        | 98.81        | 0.90                   | 110.33                     | 76.43      | 0.02                 | -60.53                   |
|        | 0                        |  | 0                      |  | 1 uM                                                                                          | 92.22        | 0.84                   | 116.03                     | 80.72      | 0.05                 | -24.24                   |
|        | 0.1 uM                   |  | 0.1 uM                 |  | 10 uM <td>83.33</td> <td>0.81</td> <td>2.90</td> <td>85.46</td> <td>0.05</td> <td>-29.86</td> | 83.33        | 0.81                   | 2.90                       | 85.46      | 0.05                 | -29.86                   |
|        | concentration            |  | concentration          |  |                                                                                               |              |                        |                            |            |                      |                          |

Compound

Normalized Values (A and B Sets)

Responses

| GW9662 | Percent Green Cells (AB) |  | Percent Red Cells (AB) |  | Average Response                                                                               |              |                        |                            |            |                      |                          |
|--------|--------------------------|--|------------------------|--|------------------------------------------------------------------------------------------------|--------------|------------------------|----------------------------|------------|----------------------|--------------------------|
|        | Percent Response         |  | Percent Response       |  | Dose                                                                                           | Green Signal | Actual Pct Green Cells | Normalized Pct Green Cells | Red Signal | Actual Pct Red Cells | Normalized Pct Red Cells |
|        | 100                      |  | 100                    |  | 0.1 uM                                                                                         | 99.92        | 0.90                   | 230.98                     | 85.38      | 0.05                 | -37.95                   |
|        | 0                        |  | 0                      |  | 1 uM                                                                                           | 79.15        | 0.60                   | -98.22                     | 90.39      | 0.07                 | -31.31                   |
|        | 0.1 uM                   |  | 0.1 uM                 |  | 10 uM <td>78.49</td> <td>0.65</td> <td>182.26</td> <td>110.79</td> <td>0.12</td> <td>0.22</td> | 78.49        | 0.65                   | 182.26                     | 110.79     | 0.12                 | 0.22                     |
|        | concentration            |  | concentration          |  |                                                                                                |              |                        |                            |            |                      |                          |

Compound

Normalized Values (A and B Sets)

Responses

| GW441756 | Percent Green Cells (AB) |  | Percent Red Cells (AB) |  | Average Response                                                                                |              |                        |                            |            |                      |                          |
|----------|--------------------------|--|------------------------|--|-------------------------------------------------------------------------------------------------|--------------|------------------------|----------------------------|------------|----------------------|--------------------------|
|          | Percent Response         |  | Percent Response       |  | Dose                                                                                            | Green Signal | Actual Pct Green Cells | Normalized Pct Green Cells | Red Signal | Actual Pct Red Cells | Normalized Pct Red Cells |
|          | 100                      |  | 100                    |  | 0.1 uM                                                                                          | 83.87        | 0.82                   | -58.25                     | 65.87      | 0.02                 | -52.74                   |
|          | 0                        |  | 0                      |  | 1 uM                                                                                            | 93.08        | 0.81                   | 63.30                      | 67.29      | 0.03                 | -51.82                   |
|          | 0.1 uM                   |  | 0.1 uM                 |  | 10 uM <td>101.19</td> <td>0.89</td> <td>89.96</td> <td>77.47</td> <td>0.03</td> <td>-47.97</td> | 101.19       | 0.89                   | 89.96                      | 77.47      | 0.03                 | -47.97                   |
|          | concentration            |  | concentration          |  |                                                                                                 |              |                        |                            |            |                      |                          |

Compound

Normalized Values (A and B Sets)

Responses

| GW501516 | Percent Green Cells (AB) |  | Percent Red Cells (AB) |  | Average Response                                                                                  |              |                        |                            |            |                      |                          |
|----------|--------------------------|--|------------------------|--|---------------------------------------------------------------------------------------------------|--------------|------------------------|----------------------------|------------|----------------------|--------------------------|
|          | Percent Response         |  | Percent Response       |  | Dose                                                                                              | Green Signal | Actual Pct Green Cells | Normalized Pct Green Cells | Red Signal | Actual Pct Red Cells | Normalized Pct Red Cells |
|          | 100                      |  | 100                    |  | 0.1 uM                                                                                            | 102.22       | 0.86                   | 34.19                      | 102.30     | 0.11                 | -23.20                   |
|          | 0                        |  | 0                      |  | 1 uM                                                                                              | 95.31        | 0.77                   | 25.97                      | 105.75     | 0.11                 | -8.31                    |
|          | 0.1 uM                   |  | 0.1 uM                 |  | 10 uM <td>111.87</td> <td>0.92</td> <td>127.29</td> <td>105.94</td> <td>0.09</td> <td>-17.48</td> | 111.87       | 0.92                   | 127.29                     | 105.94     | 0.09                 | -17.48                   |
|          | concentration            |  | concentration          |  |                                                                                                   |              |                        |                            |            |                      |                          |

Compound

Normalized Values (A and B Sets)

Responses

| GW788388 | Percent Green Cells (AB) |  | Percent Red Cells (AB)  |  | Average Response |              |                        |                            |            |                      |                          |       |        |       |       |        |      |      |      |       |        |
|----------|--------------------------|--|-------------------------|--|------------------|--------------|------------------------|----------------------------|------------|----------------------|--------------------------|-------|--------|-------|-------|--------|------|------|------|-------|--------|
|          | 100<br>Percent Response  |  | 100<br>Percent Response |  | Dose             | Green Signal | Actual Pct Green Cells | Normalized Pct Green Cells | Red Signal | Actual Pct Red Cells | Normalized Pct Red Cells |       |        |       |       |        |      |      |      |       |        |
|          | 0.1 uM 1 uM 10 uM        |  | 0.1 uM 1 uM 10 uM       |  | 0.1 uM           | 1 uM         | 10 uM                  | 0.1 uM                     | 1 uM       | 10 uM                | 0.1 uM                   | 1 uM  | 10 uM  |       |       |        |      |      |      |       |        |
|          | concentration            |  | concentration           |  | 98.39            | 99.19        | 106.99                 | 0.91                       | 0.83       | 0.89                 | 108.73                   | 70.83 | 209.99 | 94.70 | 86.93 | 103.52 | 0.11 | 0.08 | 0.10 | -6.24 | -22.18 |
|          |                          |  |                         |  |                  |              |                        |                            |            |                      |                          |       |        |       |       |        |      |      |      |       |        |

Compound

Normalized Values (A and B Sets)

Responses

| GW842166X | Percent Green Cells (AB) |  | Percent Red Cells (AB)  |  | Average Response |              |                        |                            |            |                      |                          |       |       |       |        |       |      |      |      |        |       |
|-----------|--------------------------|--|-------------------------|--|------------------|--------------|------------------------|----------------------------|------------|----------------------|--------------------------|-------|-------|-------|--------|-------|------|------|------|--------|-------|
|           | 100<br>Percent Response  |  | 100<br>Percent Response |  | Dose             | Green Signal | Actual Pct Green Cells | Normalized Pct Green Cells | Red Signal | Actual Pct Red Cells | Normalized Pct Red Cells |       |       |       |        |       |      |      |      |        |       |
|           | 0.1 uM 1 uM 10 uM        |  | 0.1 uM 1 uM 10 uM       |  | 0.1 uM           | 1 uM         | 10 uM                  | 0.1 uM                     | 1 uM       | 10 uM                | 0.1 uM                   | 1 uM  | 10 uM |       |        |       |      |      |      |        |       |
|           | concentration            |  | concentration           |  | 88.50            | 95.12        | 94.46                  | 0.83                       | 0.83       | 0.89                 | 29.08                    | 70.78 | 32.57 | 83.66 | 104.39 | 99.11 | 0.06 | 0.12 | 0.09 | -29.36 | -0.80 |
|           |                          |  |                         |  |                  |              |                        |                            |            |                      |                          |       |       |       |        |       |      |      |      |        |       |

Compound

Normalized Values (A and B Sets)

Responses

| Gynostemma Extract | Percent Green Cells (AB) |  | Percent Red Cells (AB)  |  | Average Response |              |                        |                            |            |                      |                          |        |       |       |       |       |      |      |      |        |       |
|--------------------|--------------------------|--|-------------------------|--|------------------|--------------|------------------------|----------------------------|------------|----------------------|--------------------------|--------|-------|-------|-------|-------|------|------|------|--------|-------|
|                    | 100<br>Percent Response  |  | 100<br>Percent Response |  | Dose             | Green Signal | Actual Pct Green Cells | Normalized Pct Green Cells | Red Signal | Actual Pct Red Cells | Normalized Pct Red Cells |        |       |       |       |       |      |      |      |        |       |
|                    | 0.1 uM 1 uM 10 uM        |  | 0.1 uM 1 uM 10 uM       |  | 0.1 uM           | 1 uM         | 10 uM                  | 0.1 uM                     | 1 uM       | 10 uM                | 0.1 uM                   | 1 uM   | 10 uM |       |       |       |      |      |      |        |       |
|                    | concentration            |  | concentration           |  | 99.05            | 99.60        | 97.48                  | 0.90                       | 0.88       | 0.92                 | 109.09                   | -69.76 | 99.94 | 89.23 | 91.79 | 74.21 | 0.04 | 0.09 | 0.03 | -51.43 | -4.65 |
|                    |                          |  |                         |  |                  |              |                        |                            |            |                      |                          |        |       |       |       |       |      |      |      |        |       |

Compound

Normalized Values (A and B Sets)

Responses

| GZD824 | Percent Green Cells (AB) |  | Percent Red Cells (AB)  |  | Average Response |              |                        |                            |            |                      |                          |        |        |        |        |        |      |      |      |       |       |
|--------|--------------------------|--|-------------------------|--|------------------|--------------|------------------------|----------------------------|------------|----------------------|--------------------------|--------|--------|--------|--------|--------|------|------|------|-------|-------|
|        | 100<br>Percent Response  |  | 100<br>Percent Response |  | Dose             | Green Signal | Actual Pct Green Cells | Normalized Pct Green Cells | Red Signal | Actual Pct Red Cells | Normalized Pct Red Cells |        |        |        |        |        |      |      |      |       |       |
|        | 0.1 uM 1 uM 10 uM        |  | 0.1 uM 1 uM 10 uM       |  | 0.1 uM           | 1 uM         | 10 uM                  | 0.1 uM                     | 1 uM       | 10 uM                | 0.1 uM                   | 1 uM   | 10 uM  |        |        |        |      |      |      |       |       |
|        | concentration            |  | concentration           |  | 87.12            | 116.38       | 89.09                  | 0.80                       | 0.90       | 0.83                 | 224.65                   | 132.55 | 122.22 | 114.02 | 107.59 | 101.02 | 0.18 | 0.16 | 0.08 | 28.98 | 14.79 |
|        |                          |  |                         |  |                  |              |                        |                            |            |                      |                          |        |        |        |        |        |      |      |      |       |       |

Compound

Normalized Values (A and B Sets)

Responses

| HA14-1 | Percent Green Cells (AB) |  | Percent Red Cells (AB)  |  | Average Response |              |                        |                            |            |                      |                          |        |       |       |       |       |      |      |      |        |        |
|--------|--------------------------|--|-------------------------|--|------------------|--------------|------------------------|----------------------------|------------|----------------------|--------------------------|--------|-------|-------|-------|-------|------|------|------|--------|--------|
|        | 100<br>Percent Response  |  | 100<br>Percent Response |  | Dose             | Green Signal | Actual Pct Green Cells | Normalized Pct Green Cells | Red Signal | Actual Pct Red Cells | Normalized Pct Red Cells |        |       |       |       |       |      |      |      |        |        |
|        | 0.1 uM 1 uM 10 uM        |  | 0.1 uM 1 uM 10 uM       |  | 0.1 uM           | 1 uM         | 10 uM                  | 0.1 uM                     | 1 uM       | 10 uM                | 0.1 uM                   | 1 uM   | 10 uM |       |       |       |      |      |      |        |        |
|        | concentration            |  | concentration           |  | 99.76            | 98.26        | 92.23                  | 0.89                       | 0.88       | 0.81                 | 105.18                   | 101.80 | 56.63 | 71.54 | 82.41 | 80.58 | 0.02 | 0.03 | 0.02 | -64.64 | -42.19 |
|        |                          |  |                         |  |                  |              |                        |                            |            |                      |                          |        |       |       |       |       |      |      |      |        |        |

| Compound                      | Normalized Values (A and B Sets) | Responses                                                                                                                                                                                                                                                                                                                                                                                                                                                                                                                                                                                                                                                                        |                  |                        |                            |            |                      |                          |  |      |              |                        |                            |            |                      |                          |        |       |      |       |       |      |        |      |       |      |        |       |      |        |       |       |      |        |       |      |        |
|-------------------------------|----------------------------------|----------------------------------------------------------------------------------------------------------------------------------------------------------------------------------------------------------------------------------------------------------------------------------------------------------------------------------------------------------------------------------------------------------------------------------------------------------------------------------------------------------------------------------------------------------------------------------------------------------------------------------------------------------------------------------|------------------|------------------------|----------------------------|------------|----------------------|--------------------------|--|------|--------------|------------------------|----------------------------|------------|----------------------|--------------------------|--------|-------|------|-------|-------|------|--------|------|-------|------|--------|-------|------|--------|-------|-------|------|--------|-------|------|--------|
| <b>Halobetasol Propionate</b> |                                  | <table border="1"> <thead> <tr> <th colspan="7">Average Response</th> </tr> <tr> <th>Dose</th> <th>Green Signal</th> <th>Actual Pct Green Cells</th> <th>Normalized Pct Green Cells</th> <th>Red Signal</th> <th>Actual Pct Red Cells</th> <th>Normalized Pct Red Cells</th> </tr> </thead> <tbody> <tr> <td>0.1 uM</td> <td>93.43</td> <td>0.84</td> <td>70.29</td> <td>88.97</td> <td>0.09</td> <td>-16.67</td> </tr> <tr> <td>1 uM</td> <td>78.26</td> <td>0.61</td> <td>-89.16</td> <td>84.87</td> <td>0.07</td> <td>-28.61</td> </tr> <tr> <td>10 uM</td> <td>84.26</td> <td>0.70</td> <td>121.85</td> <td>79.92</td> <td>0.05</td> <td>-34.79</td> </tr> </tbody> </table> | Average Response |                        |                            |            |                      |                          |  | Dose | Green Signal | Actual Pct Green Cells | Normalized Pct Green Cells | Red Signal | Actual Pct Red Cells | Normalized Pct Red Cells | 0.1 uM | 93.43 | 0.84 | 70.29 | 88.97 | 0.09 | -16.67 | 1 uM | 78.26 | 0.61 | -89.16 | 84.87 | 0.07 | -28.61 | 10 uM | 84.26 | 0.70 | 121.85 | 79.92 | 0.05 | -34.79 |
|                               |                                  | Average Response                                                                                                                                                                                                                                                                                                                                                                                                                                                                                                                                                                                                                                                                 |                  |                        |                            |            |                      |                          |  |      |              |                        |                            |            |                      |                          |        |       |      |       |       |      |        |      |       |      |        |       |      |        |       |       |      |        |       |      |        |
|                               |                                  | Dose                                                                                                                                                                                                                                                                                                                                                                                                                                                                                                                                                                                                                                                                             | Green Signal     | Actual Pct Green Cells | Normalized Pct Green Cells | Red Signal | Actual Pct Red Cells | Normalized Pct Red Cells |  |      |              |                        |                            |            |                      |                          |        |       |      |       |       |      |        |      |       |      |        |       |      |        |       |       |      |        |       |      |        |
|                               |                                  | 0.1 uM                                                                                                                                                                                                                                                                                                                                                                                                                                                                                                                                                                                                                                                                           | 93.43            | 0.84                   | 70.29                      | 88.97      | 0.09                 | -16.67                   |  |      |              |                        |                            |            |                      |                          |        |       |      |       |       |      |        |      |       |      |        |       |      |        |       |       |      |        |       |      |        |
| 1 uM                          | 78.26                            | 0.61                                                                                                                                                                                                                                                                                                                                                                                                                                                                                                                                                                                                                                                                             | -89.16           | 84.87                  | 0.07                       | -28.61     |                      |                          |  |      |              |                        |                            |            |                      |                          |        |       |      |       |       |      |        |      |       |      |        |       |      |        |       |       |      |        |       |      |        |
| 10 uM                         | 84.26                            | 0.70                                                                                                                                                                                                                                                                                                                                                                                                                                                                                                                                                                                                                                                                             | 121.85           | 79.92                  | 0.05                       | -34.79     |                      |                          |  |      |              |                        |                            |            |                      |                          |        |       |      |       |       |      |        |      |       |      |        |       |      |        |       |       |      |        |       |      |        |

| Compound         | Normalized Values (A and B Sets) | Responses                                                                                                                                                                                                                                                                                                                                                                                                                                                                                                                                                                                                                                                                         |                  |                        |                            |            |                      |                          |  |      |              |                        |                            |            |                      |                          |        |       |      |        |       |      |        |      |       |      |        |       |      |        |       |       |      |        |       |      |        |
|------------------|----------------------------------|-----------------------------------------------------------------------------------------------------------------------------------------------------------------------------------------------------------------------------------------------------------------------------------------------------------------------------------------------------------------------------------------------------------------------------------------------------------------------------------------------------------------------------------------------------------------------------------------------------------------------------------------------------------------------------------|------------------|------------------------|----------------------------|------------|----------------------|--------------------------|--|------|--------------|------------------------|----------------------------|------------|----------------------|--------------------------|--------|-------|------|--------|-------|------|--------|------|-------|------|--------|-------|------|--------|-------|-------|------|--------|-------|------|--------|
| <b>HC-030031</b> |                                  | <table border="1"> <thead> <tr> <th colspan="7">Average Response</th> </tr> <tr> <th>Dose</th> <th>Green Signal</th> <th>Actual Pct Green Cells</th> <th>Normalized Pct Green Cells</th> <th>Red Signal</th> <th>Actual Pct Red Cells</th> <th>Normalized Pct Red Cells</th> </tr> </thead> <tbody> <tr> <td>0.1 uM</td> <td>94.24</td> <td>0.89</td> <td>155.45</td> <td>75.05</td> <td>0.02</td> <td>-55.15</td> </tr> <tr> <td>1 uM</td> <td>82.74</td> <td>0.71</td> <td>-11.40</td> <td>76.14</td> <td>0.03</td> <td>-54.70</td> </tr> <tr> <td>10 uM</td> <td>82.30</td> <td>0.74</td> <td>-56.70</td> <td>79.32</td> <td>0.02</td> <td>-51.82</td> </tr> </tbody> </table> | Average Response |                        |                            |            |                      |                          |  | Dose | Green Signal | Actual Pct Green Cells | Normalized Pct Green Cells | Red Signal | Actual Pct Red Cells | Normalized Pct Red Cells | 0.1 uM | 94.24 | 0.89 | 155.45 | 75.05 | 0.02 | -55.15 | 1 uM | 82.74 | 0.71 | -11.40 | 76.14 | 0.03 | -54.70 | 10 uM | 82.30 | 0.74 | -56.70 | 79.32 | 0.02 | -51.82 |
|                  |                                  | Average Response                                                                                                                                                                                                                                                                                                                                                                                                                                                                                                                                                                                                                                                                  |                  |                        |                            |            |                      |                          |  |      |              |                        |                            |            |                      |                          |        |       |      |        |       |      |        |      |       |      |        |       |      |        |       |       |      |        |       |      |        |
|                  |                                  | Dose                                                                                                                                                                                                                                                                                                                                                                                                                                                                                                                                                                                                                                                                              | Green Signal     | Actual Pct Green Cells | Normalized Pct Green Cells | Red Signal | Actual Pct Red Cells | Normalized Pct Red Cells |  |      |              |                        |                            |            |                      |                          |        |       |      |        |       |      |        |      |       |      |        |       |      |        |       |       |      |        |       |      |        |
|                  |                                  | 0.1 uM                                                                                                                                                                                                                                                                                                                                                                                                                                                                                                                                                                                                                                                                            | 94.24            | 0.89                   | 155.45                     | 75.05      | 0.02                 | -55.15                   |  |      |              |                        |                            |            |                      |                          |        |       |      |        |       |      |        |      |       |      |        |       |      |        |       |       |      |        |       |      |        |
| 1 uM             | 82.74                            | 0.71                                                                                                                                                                                                                                                                                                                                                                                                                                                                                                                                                                                                                                                                              | -11.40           | 76.14                  | 0.03                       | -54.70     |                      |                          |  |      |              |                        |                            |            |                      |                          |        |       |      |        |       |      |        |      |       |      |        |       |      |        |       |       |      |        |       |      |        |
| 10 uM            | 82.30                            | 0.74                                                                                                                                                                                                                                                                                                                                                                                                                                                                                                                                                                                                                                                                              | -56.70           | 79.32                  | 0.02                       | -51.82     |                      |                          |  |      |              |                        |                            |            |                      |                          |        |       |      |        |       |      |        |      |       |      |        |       |      |        |       |       |      |        |       |      |        |

| Compound           | Normalized Values (A and B Sets) | Responses                                                                                                                                                                                                                                                                                                                                                                                                                                                                                                                                                                                                                                                                       |                  |                        |                            |            |                      |                          |  |      |              |                        |                            |            |                      |                          |        |       |      |       |       |      |        |      |       |      |       |       |      |        |       |       |      |        |        |      |       |
|--------------------|----------------------------------|---------------------------------------------------------------------------------------------------------------------------------------------------------------------------------------------------------------------------------------------------------------------------------------------------------------------------------------------------------------------------------------------------------------------------------------------------------------------------------------------------------------------------------------------------------------------------------------------------------------------------------------------------------------------------------|------------------|------------------------|----------------------------|------------|----------------------|--------------------------|--|------|--------------|------------------------|----------------------------|------------|----------------------|--------------------------|--------|-------|------|-------|-------|------|--------|------|-------|------|-------|-------|------|--------|-------|-------|------|--------|--------|------|-------|
| <b>Hematoxylin</b> |                                  | <table border="1"> <thead> <tr> <th colspan="7">Average Response</th> </tr> <tr> <th>Dose</th> <th>Green Signal</th> <th>Actual Pct Green Cells</th> <th>Normalized Pct Green Cells</th> <th>Red Signal</th> <th>Actual Pct Red Cells</th> <th>Normalized Pct Red Cells</th> </tr> </thead> <tbody> <tr> <td>0.1 uM</td> <td>92.51</td> <td>0.88</td> <td>78.84</td> <td>87.03</td> <td>0.06</td> <td>-27.45</td> </tr> <tr> <td>1 uM</td> <td>86.53</td> <td>0.74</td> <td>14.86</td> <td>75.52</td> <td>0.02</td> <td>-45.84</td> </tr> <tr> <td>10 uM</td> <td>98.07</td> <td>0.92</td> <td>223.92</td> <td>119.45</td> <td>0.20</td> <td>37.77</td> </tr> </tbody> </table> | Average Response |                        |                            |            |                      |                          |  | Dose | Green Signal | Actual Pct Green Cells | Normalized Pct Green Cells | Red Signal | Actual Pct Red Cells | Normalized Pct Red Cells | 0.1 uM | 92.51 | 0.88 | 78.84 | 87.03 | 0.06 | -27.45 | 1 uM | 86.53 | 0.74 | 14.86 | 75.52 | 0.02 | -45.84 | 10 uM | 98.07 | 0.92 | 223.92 | 119.45 | 0.20 | 37.77 |
|                    |                                  | Average Response                                                                                                                                                                                                                                                                                                                                                                                                                                                                                                                                                                                                                                                                |                  |                        |                            |            |                      |                          |  |      |              |                        |                            |            |                      |                          |        |       |      |       |       |      |        |      |       |      |       |       |      |        |       |       |      |        |        |      |       |
|                    |                                  | Dose                                                                                                                                                                                                                                                                                                                                                                                                                                                                                                                                                                                                                                                                            | Green Signal     | Actual Pct Green Cells | Normalized Pct Green Cells | Red Signal | Actual Pct Red Cells | Normalized Pct Red Cells |  |      |              |                        |                            |            |                      |                          |        |       |      |       |       |      |        |      |       |      |       |       |      |        |       |       |      |        |        |      |       |
|                    |                                  | 0.1 uM                                                                                                                                                                                                                                                                                                                                                                                                                                                                                                                                                                                                                                                                          | 92.51            | 0.88                   | 78.84                      | 87.03      | 0.06                 | -27.45                   |  |      |              |                        |                            |            |                      |                          |        |       |      |       |       |      |        |      |       |      |       |       |      |        |       |       |      |        |        |      |       |
| 1 uM               | 86.53                            | 0.74                                                                                                                                                                                                                                                                                                                                                                                                                                                                                                                                                                                                                                                                            | 14.86            | 75.52                  | 0.02                       | -45.84     |                      |                          |  |      |              |                        |                            |            |                      |                          |        |       |      |       |       |      |        |      |       |      |       |       |      |        |       |       |      |        |        |      |       |
| 10 uM              | 98.07                            | 0.92                                                                                                                                                                                                                                                                                                                                                                                                                                                                                                                                                                                                                                                                            | 223.92           | 119.45                 | 0.20                       | 37.77      |                      |                          |  |      |              |                        |                            |            |                      |                          |        |       |      |       |       |      |        |      |       |      |       |       |      |        |       |       |      |        |        |      |       |

| Compound                | Normalized Values (A and B Sets) | Responses                                                                                                                                                                                                                                                                                                                                                                                                                                                                                                                                                                                                                                                                       |                  |                        |                            |            |                      |                          |  |      |              |                        |                            |            |                      |                          |        |       |      |       |       |      |        |      |       |      |       |       |      |        |       |       |      |        |       |      |        |
|-------------------------|----------------------------------|---------------------------------------------------------------------------------------------------------------------------------------------------------------------------------------------------------------------------------------------------------------------------------------------------------------------------------------------------------------------------------------------------------------------------------------------------------------------------------------------------------------------------------------------------------------------------------------------------------------------------------------------------------------------------------|------------------|------------------------|----------------------------|------------|----------------------|--------------------------|--|------|--------------|------------------------|----------------------------|------------|----------------------|--------------------------|--------|-------|------|-------|-------|------|--------|------|-------|------|-------|-------|------|--------|-------|-------|------|--------|-------|------|--------|
| <b>HER2-Inhibitor-1</b> |                                  | <table border="1"> <thead> <tr> <th colspan="7">Average Response</th> </tr> <tr> <th>Dose</th> <th>Green Signal</th> <th>Actual Pct Green Cells</th> <th>Normalized Pct Green Cells</th> <th>Red Signal</th> <th>Actual Pct Red Cells</th> <th>Normalized Pct Red Cells</th> </tr> </thead> <tbody> <tr> <td>0.1 uM</td> <td>94.13</td> <td>0.86</td> <td>67.17</td> <td>71.92</td> <td>0.03</td> <td>-43.54</td> </tr> <tr> <td>1 uM</td> <td>94.62</td> <td>0.82</td> <td>62.45</td> <td>80.06</td> <td>0.03</td> <td>-41.09</td> </tr> <tr> <td>10 uM</td> <td>97.54</td> <td>0.91</td> <td>319.72</td> <td>81.23</td> <td>0.02</td> <td>-47.01</td> </tr> </tbody> </table> | Average Response |                        |                            |            |                      |                          |  | Dose | Green Signal | Actual Pct Green Cells | Normalized Pct Green Cells | Red Signal | Actual Pct Red Cells | Normalized Pct Red Cells | 0.1 uM | 94.13 | 0.86 | 67.17 | 71.92 | 0.03 | -43.54 | 1 uM | 94.62 | 0.82 | 62.45 | 80.06 | 0.03 | -41.09 | 10 uM | 97.54 | 0.91 | 319.72 | 81.23 | 0.02 | -47.01 |
|                         |                                  | Average Response                                                                                                                                                                                                                                                                                                                                                                                                                                                                                                                                                                                                                                                                |                  |                        |                            |            |                      |                          |  |      |              |                        |                            |            |                      |                          |        |       |      |       |       |      |        |      |       |      |       |       |      |        |       |       |      |        |       |      |        |
|                         |                                  | Dose                                                                                                                                                                                                                                                                                                                                                                                                                                                                                                                                                                                                                                                                            | Green Signal     | Actual Pct Green Cells | Normalized Pct Green Cells | Red Signal | Actual Pct Red Cells | Normalized Pct Red Cells |  |      |              |                        |                            |            |                      |                          |        |       |      |       |       |      |        |      |       |      |       |       |      |        |       |       |      |        |       |      |        |
|                         |                                  | 0.1 uM                                                                                                                                                                                                                                                                                                                                                                                                                                                                                                                                                                                                                                                                          | 94.13            | 0.86                   | 67.17                      | 71.92      | 0.03                 | -43.54                   |  |      |              |                        |                            |            |                      |                          |        |       |      |       |       |      |        |      |       |      |       |       |      |        |       |       |      |        |       |      |        |
| 1 uM                    | 94.62                            | 0.82                                                                                                                                                                                                                                                                                                                                                                                                                                                                                                                                                                                                                                                                            | 62.45            | 80.06                  | 0.03                       | -41.09     |                      |                          |  |      |              |                        |                            |            |                      |                          |        |       |      |       |       |      |        |      |       |      |       |       |      |        |       |       |      |        |       |      |        |
| 10 uM                   | 97.54                            | 0.91                                                                                                                                                                                                                                                                                                                                                                                                                                                                                                                                                                                                                                                                            | 319.72           | 81.23                  | 0.02                       | -47.01     |                      |                          |  |      |              |                        |                            |            |                      |                          |        |       |      |       |       |      |        |      |       |      |       |       |      |        |       |       |      |        |       |      |        |

| Compound          | Normalized Values (A and B Sets) | Responses                                                                                                                                                                                                                                                                                                                                                                                                                                                                                                                                                                                                                                                                        |                  |                        |                            |            |                      |                          |  |      |              |                        |                            |            |                      |                          |        |       |      |       |       |      |        |      |       |      |        |        |      |       |       |       |      |        |       |      |        |
|-------------------|----------------------------------|----------------------------------------------------------------------------------------------------------------------------------------------------------------------------------------------------------------------------------------------------------------------------------------------------------------------------------------------------------------------------------------------------------------------------------------------------------------------------------------------------------------------------------------------------------------------------------------------------------------------------------------------------------------------------------|------------------|------------------------|----------------------------|------------|----------------------|--------------------------|--|------|--------------|------------------------|----------------------------|------------|----------------------|--------------------------|--------|-------|------|-------|-------|------|--------|------|-------|------|--------|--------|------|-------|-------|-------|------|--------|-------|------|--------|
| <b>Hesperadin</b> |                                  | <table border="1"> <thead> <tr> <th colspan="7">Average Response</th> </tr> <tr> <th>Dose</th> <th>Green Signal</th> <th>Actual Pct Green Cells</th> <th>Normalized Pct Green Cells</th> <th>Red Signal</th> <th>Actual Pct Red Cells</th> <th>Normalized Pct Red Cells</th> </tr> </thead> <tbody> <tr> <td>0.1 uM</td> <td>94.44</td> <td>0.85</td> <td>37.76</td> <td>87.72</td> <td>0.08</td> <td>-36.59</td> </tr> <tr> <td>1 uM</td> <td>98.02</td> <td>0.70</td> <td>112.74</td> <td>108.27</td> <td>0.12</td> <td>-2.79</td> </tr> <tr> <td>10 uM</td> <td>86.12</td> <td>0.63</td> <td>-53.63</td> <td>75.46</td> <td>0.04</td> <td>-36.99</td> </tr> </tbody> </table> | Average Response |                        |                            |            |                      |                          |  | Dose | Green Signal | Actual Pct Green Cells | Normalized Pct Green Cells | Red Signal | Actual Pct Red Cells | Normalized Pct Red Cells | 0.1 uM | 94.44 | 0.85 | 37.76 | 87.72 | 0.08 | -36.59 | 1 uM | 98.02 | 0.70 | 112.74 | 108.27 | 0.12 | -2.79 | 10 uM | 86.12 | 0.63 | -53.63 | 75.46 | 0.04 | -36.99 |
|                   |                                  | Average Response                                                                                                                                                                                                                                                                                                                                                                                                                                                                                                                                                                                                                                                                 |                  |                        |                            |            |                      |                          |  |      |              |                        |                            |            |                      |                          |        |       |      |       |       |      |        |      |       |      |        |        |      |       |       |       |      |        |       |      |        |
|                   |                                  | Dose                                                                                                                                                                                                                                                                                                                                                                                                                                                                                                                                                                                                                                                                             | Green Signal     | Actual Pct Green Cells | Normalized Pct Green Cells | Red Signal | Actual Pct Red Cells | Normalized Pct Red Cells |  |      |              |                        |                            |            |                      |                          |        |       |      |       |       |      |        |      |       |      |        |        |      |       |       |       |      |        |       |      |        |
|                   |                                  | 0.1 uM                                                                                                                                                                                                                                                                                                                                                                                                                                                                                                                                                                                                                                                                           | 94.44            | 0.85                   | 37.76                      | 87.72      | 0.08                 | -36.59                   |  |      |              |                        |                            |            |                      |                          |        |       |      |       |       |      |        |      |       |      |        |        |      |       |       |       |      |        |       |      |        |
| 1 uM              | 98.02                            | 0.70                                                                                                                                                                                                                                                                                                                                                                                                                                                                                                                                                                                                                                                                             | 112.74           | 108.27                 | 0.12                       | -2.79      |                      |                          |  |      |              |                        |                            |            |                      |                          |        |       |      |       |       |      |        |      |       |      |        |        |      |       |       |       |      |        |       |      |        |
| 10 uM             | 86.12                            | 0.63                                                                                                                                                                                                                                                                                                                                                                                                                                                                                                                                                                                                                                                                             | -53.63           | 75.46                  | 0.04                       | -36.99     |                      |                          |  |      |              |                        |                            |            |                      |                          |        |       |      |       |       |      |        |      |       |      |        |        |      |       |       |       |      |        |       |      |        |

Compound

Normalized Values (A and B Sets)

Responses

| Hexestrol | Percent Green Cells (AB) |     | Percent Red Cells (AB) |   | Average Response |              |                        |                            |            |                      |                          |
|-----------|--------------------------|-----|------------------------|---|------------------|--------------|------------------------|----------------------------|------------|----------------------|--------------------------|
|           | Percent Response         |     | Percent Response       |   | Dose             | Green Signal | Actual Pct Green Cells | Normalized Pct Green Cells | Red Signal | Actual Pct Red Cells | Normalized Pct Red Cells |
|           | 100                      |     | 100                    |   |                  |              |                        |                            |            |                      |                          |
|           | 0                        |     | 0                      |   |                  |              |                        |                            |            |                      |                          |
|           | 0.1 uM                   | 100 | 100                    | 0 | 0                | 104.33       | 0.90                   | 108.87                     | 77.21      | 0.04                 | -39.34                   |
|           | 1 uM                     | 95  | 95                     | 0 | 0                | 81.24        | 0.65                   | -11.62                     | 90.14      | 0.06                 | -27.95                   |
|           | 10 uM                    | 95  | 95                     | 0 | 0                | 105.21       | 0.92                   | 228.11                     | 106.31     | 0.12                 | -1.37                    |

Compound

Normalized Values (A and B Sets)

Responses

| HLI 373 | Percent Green Cells (AB) |     | Percent Red Cells (AB) |   | Average Response |              |                        |                            |            |                      |                          |
|---------|--------------------------|-----|------------------------|---|------------------|--------------|------------------------|----------------------------|------------|----------------------|--------------------------|
|         | Percent Response         |     | Percent Response       |   | Dose             | Green Signal | Actual Pct Green Cells | Normalized Pct Green Cells | Red Signal | Actual Pct Red Cells | Normalized Pct Red Cells |
|         | 100                      |     | 100                    |   |                  |              |                        |                            |            |                      |                          |
|         | 0                        |     | 0                      |   |                  |              |                        |                            |            |                      |                          |
|         | 0.1 uM                   | 15  | 55                     | 0 | 0                | 87.39        | 0.82                   | 34.87                      | 88.34      | 0.06                 | -36.21                   |
|         | 1 uM                     | 100 | 100                    | 0 | 0                | 107.35       | 0.94                   | 193.90                     | 78.88      | 0.04                 | -28.54                   |
|         | 10 uM                    | 85  | 85                     | 0 | 0                | 91.99        | 0.85                   | 41.90                      | 76.47      | 0.08                 | -17.74                   |

Compound

Normalized Values (A and B Sets)

Responses

| HMN-214 | Percent Green Cells (AB) |   | Percent Red Cells (AB) |    | Average Response |              |                        |                            |            |                      |                          |
|---------|--------------------------|---|------------------------|----|------------------|--------------|------------------------|----------------------------|------------|----------------------|--------------------------|
|         | Percent Response         |   | Percent Response       |    | Dose             | Green Signal | Actual Pct Green Cells | Normalized Pct Green Cells | Red Signal | Actual Pct Red Cells | Normalized Pct Red Cells |
|         | 100                      |   | 100                    |    |                  |              |                        |                            |            |                      |                          |
|         | 0                        |   | 0                      |    |                  |              |                        |                            |            |                      |                          |
|         | 0.1 uM                   | 0 | 0                      | 5  | 0                | 87.20        | 0.76                   | -16.51                     | 102.95     | 0.10                 | -25.82                   |
|         | 1 uM                     | 0 | 55                     | 5  | 0                | 94.09        | 0.74                   | 122.03                     | 109.86     | 0.14                 | 7.25                     |
|         | 10 uM                    | 0 | 0                      | 65 | 0                | 96.25        | 0.67                   | -38.94                     | 129.37     | 0.19                 | 33.07                    |

Compound

Normalized Values (A and B Sets)

Responses

| Homatropine Methylbromide | Percent Green Cells (AB) |    | Percent Red Cells (AB) |   | Average Response |              |                        |                            |            |                      |                          |
|---------------------------|--------------------------|----|------------------------|---|------------------|--------------|------------------------|----------------------------|------------|----------------------|--------------------------|
|                           | Percent Response         |    | Percent Response       |   | Dose             | Green Signal | Actual Pct Green Cells | Normalized Pct Green Cells | Red Signal | Actual Pct Red Cells | Normalized Pct Red Cells |
|                           | 100                      |    | 100                    |   |                  |              |                        |                            |            |                      |                          |
|                           | 0                        |    | 0                      |   |                  |              |                        |                            |            |                      |                          |
|                           | 0.1 uM                   | 30 | 0                      | 0 | 0                | 81.32        | 0.75                   | 365.93                     | 88.35      | 0.06                 | -33.72                   |
|                           | 1 uM                     | 0  | 0                      | 0 | 0                | 82.07        | 0.66                   | -46.88                     | 60.10      | 0.01                 | -63.45                   |
|                           | 10 uM                    | 0  | 0                      | 0 | 0                | 96.37        | 0.88                   | 92.14                      | 83.63      | 0.05                 | -38.19                   |

Compound

Normalized Values (A and B Sets)

Responses

| Hordenine | Percent Green Cells (AB) |    | Percent Red Cells (AB) |    | Average Response |              |                        |                            |            |                      |                          |
|-----------|--------------------------|----|------------------------|----|------------------|--------------|------------------------|----------------------------|------------|----------------------|--------------------------|
|           | Percent Response         |    | Percent Response       |    | Dose             | Green Signal | Actual Pct Green Cells | Normalized Pct Green Cells | Red Signal | Actual Pct Red Cells | Normalized Pct Red Cells |
|           | 100                      |    | 100                    |    |                  |              |                        |                            |            |                      |                          |
|           | 0                        |    | 0                      |    |                  |              |                        |                            |            |                      |                          |
|           | 0.1 uM                   | 95 | 25                     | 0  | 0                | 87.43        | 0.81                   | 24.23                      | 94.17      | 0.08                 | -18.54                   |
|           | 1 uM                     | 60 | 60                     | 25 | 0                | 94.26        | 0.78                   | 45.10                      | 103.41     | 0.12                 | -2.09                    |
|           | 10 uM                    | 95 | 95                     | 5  | 0                | 104.40       | 0.94                   | 441.20                     | 96.75      | 0.08                 | -20.00                   |







Compound

Normalized Values (A and B Sets)

Responses

|  |  |        |       |                        |                            |        |      |                          |
|--|--|--------|-------|------------------------|----------------------------|--------|------|--------------------------|
|  |  |        |       | Actual Pct Green Cells | Normalized Pct Green Cells |        |      | Normalized Pct Red Cells |
|  |  | 0.1 uM | 92.13 | 0.88                   | 138.43                     | 54.65  | 0.01 | -58.83                   |
|  |  | 1 uM   | 97.53 | 0.83                   | 79.57                      | 62.49  | 0.01 | -64.10                   |
|  |  | 10 uM  | 86.35 | 0.76                   | -38.21                     | 100.47 | 0.09 | -17.98                   |

Compound

Normalized Values (A and B Sets)

Responses

|                         |        |                  |              |                        |                            |            |                      |                          |
|-------------------------|--------|------------------|--------------|------------------------|----------------------------|------------|----------------------|--------------------------|
| IEM 1754 dihydrobroMide |        | Average Response |              |                        |                            |            |                      |                          |
|                         |        | Dose             | Green Signal | Actual Pct Green Cells | Normalized Pct Green Cells | Red Signal | Actual Pct Red Cells | Normalized Pct Red Cells |
|                         |        | 0.1 uM           | 97.09        | 0.89                   | 102.33                     | 107.35     | 0.19                 | 39.25                    |
|                         |        | 1 uM             | 101.32       | 0.92                   | 176.76                     | 105.77     | 0.17                 | 46.23                    |
| 10 uM                   | 100.55 | 0.92             | 105.08       | 81.75                  | 0.05                       | -26.89     |                      |                          |

Compound

Normalized Values (A and B Sets)

Responses

|                     |       |                  |              |                        |                            |            |                      |                          |
|---------------------|-------|------------------|--------------|------------------------|----------------------------|------------|----------------------|--------------------------|
| Ifenprodil Tartrate |       | Average Response |              |                        |                            |            |                      |                          |
|                     |       | Dose             | Green Signal | Actual Pct Green Cells | Normalized Pct Green Cells | Red Signal | Actual Pct Red Cells | Normalized Pct Red Cells |
|                     |       | 0.1 uM           | 98.13        | 0.90                   | 114.28                     | 74.32      | 0.05                 | -40.11                   |
|                     |       | 1 uM             | 101.60       | 0.86                   | 98.29                      | 86.32      | 0.05                 | -42.80                   |
| 10 uM               | 97.83 | 0.86             | 76.15        | 93.27                  | 0.08                       | -22.24     |                      |                          |

Compound

Normalized Values (A and B Sets)

Responses

|                             |        |                  |              |                        |                            |            |                      |                          |
|-----------------------------|--------|------------------|--------------|------------------------|----------------------------|------------|----------------------|--------------------------|
| Iloprost (GM6001, Galardin) |        | Average Response |              |                        |                            |            |                      |                          |
|                             |        | Dose             | Green Signal | Actual Pct Green Cells | Normalized Pct Green Cells | Red Signal | Actual Pct Red Cells | Normalized Pct Red Cells |
|                             |        | 0.1 uM           | 99.97        | 0.89                   | -1.66                      | 91.11      | 0.08                 | -23.39                   |
|                             |        | 1 uM             | 95.98        | 0.81                   | 65.22                      | 97.66      | 0.12                 | -7.77                    |
| 10 uM                       | 102.80 | 0.86             | 136.34       | 90.17                  | 0.06                       | -29.72     |                      |                          |

Compound

Normalized Values (A and B Sets)

Responses

|             |        |                  |              |                        |                            |            |                      |                          |
|-------------|--------|------------------|--------------|------------------------|----------------------------|------------|----------------------|--------------------------|
| Iloperidone |        | Average Response |              |                        |                            |            |                      |                          |
|             |        | Dose             | Green Signal | Actual Pct Green Cells | Normalized Pct Green Cells | Red Signal | Actual Pct Red Cells | Normalized Pct Red Cells |
|             |        | 0.1 uM           | 94.68        | 0.85                   | 76.55                      | 110.36     | 0.13                 | -2.33                    |
|             |        | 1 uM             | 108.08       | 0.88                   | 105.41                     | 112.56     | 0.13                 | 4.62                     |
| 10 uM       | 108.93 | 0.91             | 120.04       | 130.99                 | 0.17                       | 15.76      |                      |                          |

Compound

Normalized Values (A and B Sets)

Responses

| <b>Imidapril HCl</b> |        | Average Response |              |                        |                            |            |                      |                          |
|----------------------|--------|------------------|--------------|------------------------|----------------------------|------------|----------------------|--------------------------|
|                      |        | Dose             | Green Signal | Actual Pct Green Cells | Normalized Pct Green Cells | Red Signal | Actual Pct Red Cells | Normalized Pct Red Cells |
|                      |        | 0.1 uM           | 113.47       | 0.90                   | 85.72                      | 144.49     | 0.28                 | 88.19                    |
|                      |        | 1 uM             | 106.00       | 0.86                   | 69.14                      | 116.02     | 0.17                 | 17.64                    |
| 10 uM                | 108.00 | 0.85             | 82.36        | 126.51                 | 0.19                       | 33.03      |                      |                          |

Compound

Normalized Values (A and B Sets)

Responses

| <b>INCB28060</b> |       | Average Response |              |                        |                            |            |                      |                          |
|------------------|-------|------------------|--------------|------------------------|----------------------------|------------|----------------------|--------------------------|
|                  |       | Dose             | Green Signal | Actual Pct Green Cells | Normalized Pct Green Cells | Red Signal | Actual Pct Red Cells | Normalized Pct Red Cells |
|                  |       | 0.1 uM           | 90.60        | 0.84                   | 40.49                      | 98.11      | 0.11                 | -3.11                    |
|                  |       | 1 uM             | 93.89        | 0.81                   | 56.96                      | 75.30      | 0.03                 | -43.83                   |
| 10 uM            | 91.59 | 0.87             | 167.62       | 76.33                  | 0.03                       | -44.41     |                      |                          |

Compound

Normalized Values (A and B Sets)

Responses

| <b>Indacaterol Maleate</b> |        | Average Response |              |                        |                            |            |                      |                          |
|----------------------------|--------|------------------|--------------|------------------------|----------------------------|------------|----------------------|--------------------------|
|                            |        | Dose             | Green Signal | Actual Pct Green Cells | Normalized Pct Green Cells | Red Signal | Actual Pct Red Cells | Normalized Pct Red Cells |
|                            |        | 0.1 uM           | 85.55        | 0.74                   | -39.73                     | 78.76      | 0.03                 | -58.77                   |
|                            |        | 1 uM             | 89.37        | 0.81                   | 336.39                     | 70.01      | 0.04                 | -27.90                   |
| 10 uM                      | 113.67 | 0.96             | 141.02       | 96.63                  | 0.19                       | 28.51      |                      |                          |

Compound

Normalized Values (A and B Sets)

Responses

| <b>Indirubin</b> |       | Average Response |              |                        |                            |            |                      |                          |
|------------------|-------|------------------|--------------|------------------------|----------------------------|------------|----------------------|--------------------------|
|                  |       | Dose             | Green Signal | Actual Pct Green Cells | Normalized Pct Green Cells | Red Signal | Actual Pct Red Cells | Normalized Pct Red Cells |
|                  |       | 0.1 uM           | 99.02        | 0.92                   | 122.56                     | 85.06      | 0.05                 | -29.13                   |
|                  |       | 1 uM             | 115.75       | 0.95                   | 132.20                     | 106.60     | 0.14                 | 4.95                     |
| 10 uM            | 92.74 | 0.90             | -55.19       | 86.35                  | 0.05                       | -35.36     |                      |                          |

Compound

Normalized Values (A and B Sets)

Responses

| <b>INK 128 (MLN0128)</b> |        | Average Response |              |                        |                            |            |                      |                          |
|--------------------------|--------|------------------|--------------|------------------------|----------------------------|------------|----------------------|--------------------------|
|                          |        | Dose             | Green Signal | Actual Pct Green Cells | Normalized Pct Green Cells | Red Signal | Actual Pct Red Cells | Normalized Pct Red Cells |
|                          |        | 0.1 uM           | 102.33       | 0.91                   | 120.60                     | 82.19      | 0.05                 | -31.02                   |
|                          |        | 1 uM             | 105.92       | 0.87                   | 87.86                      | 118.65     | 0.19                 | 30.31                    |
| 10 uM                    | 104.25 | 0.93             | 375.12       | 100.62                 | 0.09                       | -13.47     |                      |                          |

Compound

Normalized Values (A and B Sets)

Responses

| Inosine |        |      | Average Response |              |                        |                            |            |                      |                          |
|---------|--------|------|------------------|--------------|------------------------|----------------------------|------------|----------------------|--------------------------|
|         |        |      | Dose             | Green Signal | Actual Pct Green Cells | Normalized Pct Green Cells | Red Signal | Actual Pct Red Cells | Normalized Pct Red Cells |
|         |        |      | 0.1 uM           | 109.96       | 0.95                   | 162.98                     | 107.88     | 0.14                 | 9.97                     |
|         |        |      | 1 uM             | 105.47       | 0.87                   | 83.25                      | 89.19      | 0.06                 | -27.40                   |
| 10 uM   | 111.83 | 0.94 | 410.14           | 101.93       | 0.10                   | -7.87                      |            |                      |                          |

Compound

Normalized Values (A and B Sets)

Responses

| IOWH032 |       |      | Average Response |              |                        |                            |            |                      |                          |
|---------|-------|------|------------------|--------------|------------------------|----------------------------|------------|----------------------|--------------------------|
|         |       |      | Dose             | Green Signal | Actual Pct Green Cells | Normalized Pct Green Cells | Red Signal | Actual Pct Red Cells | Normalized Pct Red Cells |
|         |       |      | 0.1 uM           | 94.00        | 0.88                   | 93.57                      | 68.71      | 0.01                 | -69.71                   |
|         |       |      | 1 uM             | 68.81        | 0.52                   | 1794.11                    | 75.41      | 0.02                 | -39.64                   |
| 10 uM   | 99.89 | 0.95 | 127.14           | 60.17        | 0.02                   | -42.63                     |            |                      |                          |

Compound

Normalized Values (A and B Sets)

Responses

| IOX2  |       |      | Average Response |              |                        |                            |            |                      |                          |
|-------|-------|------|------------------|--------------|------------------------|----------------------------|------------|----------------------|--------------------------|
|       |       |      | Dose             | Green Signal | Actual Pct Green Cells | Normalized Pct Green Cells | Red Signal | Actual Pct Red Cells | Normalized Pct Red Cells |
|       |       |      | 0.1 uM           | 97.51        | 0.90                   | 142.46                     | 68.94      | 0.01                 | -56.63                   |
|       |       |      | 1 uM             | 83.98        | 0.72                   | 2.27                       | 67.87      | 0.01                 | -60.40                   |
| 10 uM | 94.43 | 0.83 | 83.34            | 69.25        | 0.02                   | -55.42                     |            |                      |                          |

Compound

Normalized Values (A and B Sets)

Responses

| IPI-145 (INK1197) |        |      | Average Response |              |                        |                            |            |                      |                          |
|-------------------|--------|------|------------------|--------------|------------------------|----------------------------|------------|----------------------|--------------------------|
|                   |        |      | Dose             | Green Signal | Actual Pct Green Cells | Normalized Pct Green Cells | Red Signal | Actual Pct Red Cells | Normalized Pct Red Cells |
|                   |        |      | 0.1 uM           | 96.47        | 0.90                   | 173.46                     | 94.13      | 0.09                 | -19.52                   |
|                   |        |      | 1 uM             | 98.16        | 0.84                   | 87.87                      | 97.66      | 0.12                 | -5.48                    |
| 10 uM             | 108.04 | 0.85 | 145.22           | 113.47       | 0.14                   | 13.15                      |            |                      |                          |

Compound

Normalized Values (A and B Sets)

Responses

| Ipratropium Bromide |  |  | Average Response |              |                        |                            |            |                      |                          |
|---------------------|--|--|------------------|--------------|------------------------|----------------------------|------------|----------------------|--------------------------|
|                     |  |  | Dose             | Green Signal | Actual Pct Green Cells | Normalized Pct Green Cells | Red Signal | Actual Pct Red Cells | Normalized Pct Red Cells |
|                     |  |  | 0.1 uM           | 99.63        | 0.89                   | 102.52                     | 83.17      | 0.03                 | -58.15                   |
|                     |  |  | 1 uM             | 89.43        | 0.80                   | 159.14                     | 90.95      | 0.10                 | -9.56                    |



Compound

Normalized Values (A and B Sets)

Responses

|  |  |  |        |        |      |       |        |      |        |
|--|--|--|--------|--------|------|-------|--------|------|--------|
|  |  |  | 0.1 uM | 98.68  | 0.87 | 83.49 | 76.57  | 0.02 | -63.10 |
|  |  |  | 1 uM   | 101.21 | 0.87 | 83.97 | 90.69  | 0.05 | -33.89 |
|  |  |  | 10 uM  | 93.44  | 0.84 | 77.97 | 126.62 | 0.13 | -2.18  |
|  |  |  |        |        |      |       |        |      |        |

Compound

Normalized Values (A and B Sets)

Responses

| <b>Isovaleramide</b> |       |      | Average Response |              |                        |                            |            |                      |                          |
|----------------------|-------|------|------------------|--------------|------------------------|----------------------------|------------|----------------------|--------------------------|
|                      |       |      | Dose             | Green Signal | Actual Pct Green Cells | Normalized Pct Green Cells | Red Signal | Actual Pct Red Cells | Normalized Pct Red Cells |
|                      |       |      | 0.1 uM           | 90.11        | 0.85                   | -6.21                      | 89.18      | 0.07                 | -27.46                   |
|                      |       |      | 1 uM             | 89.22        | 0.65                   | -38.04                     | 76.65      | 0.03                 | -52.41                   |
| 10 uM                | 98.73 | 0.85 | 57.79            | 75.23        | 0.02                   | -52.55                     |            |                      |                          |

Compound

Normalized Values (A and B Sets)

Responses

| <b>Ispinesib (SB-715992)</b> |       |      | Average Response |              |                        |                            |            |                      |                          |
|------------------------------|-------|------|------------------|--------------|------------------------|----------------------------|------------|----------------------|--------------------------|
|                              |       |      | Dose             | Green Signal | Actual Pct Green Cells | Normalized Pct Green Cells | Red Signal | Actual Pct Red Cells | Normalized Pct Red Cells |
|                              |       |      | 0.1 uM           | 105.46       | 0.84                   | -2.51                      | 118.10     | 0.15                 | 9.39                     |
|                              |       |      | 1 uM             | 108.76       | 0.78                   | -45.56                     | 127.69     | 0.22                 | 45.06                    |
| 10 uM                        | 86.45 | 0.61 | -68.44           | 101.29       | 0.12                   | 0.80                       |            |                      |                          |

Compound

Normalized Values (A and B Sets)

Responses

| <b>Istradefylline</b> |       |      | Average Response |              |                        |                            |            |                      |                          |
|-----------------------|-------|------|------------------|--------------|------------------------|----------------------------|------------|----------------------|--------------------------|
|                       |       |      | Dose             | Green Signal | Actual Pct Green Cells | Normalized Pct Green Cells | Red Signal | Actual Pct Red Cells | Normalized Pct Red Cells |
|                       |       |      | 0.1 uM           | 102.56       | 0.92                   | 129.56                     | 85.16      | 0.06                 | -25.08                   |
|                       |       |      | 1 uM             | 108.03       | 0.91                   | 102.95                     | 104.85     | 0.14                 | 8.42                     |
| 10 uM                 | 97.47 | 0.93 | 293.41           | 89.23        | 0.04                   | -37.85                     |            |                      |                          |

Compound

Normalized Values (A and B Sets)

Responses

| <b>Itraconazole</b> |       |      | Average Response |              |                        |                            |            |                      |                          |
|---------------------|-------|------|------------------|--------------|------------------------|----------------------------|------------|----------------------|--------------------------|
|                     |       |      | Dose             | Green Signal | Actual Pct Green Cells | Normalized Pct Green Cells | Red Signal | Actual Pct Red Cells | Normalized Pct Red Cells |
|                     |       |      | 0.1 uM           | 103.58       | 0.89                   | 87.30                      | 78.04      | 0.03                 | -39.68                   |
|                     |       |      | 1 uM             | 95.24        | 0.83                   | 67.77                      | 80.53      | 0.03                 | -42.16                   |
| 10 uM               | 95.01 | 0.90 | 35.78            | 63.57        | 0.01                   | -55.37                     |            |                      |                          |

Compound

Normalized Values (A and B Sets)

Responses

| ITX 3 |       |      | Average Response |              |                        |                            |            |                      |                          |
|-------|-------|------|------------------|--------------|------------------------|----------------------------|------------|----------------------|--------------------------|
|       |       |      | Dose             | Green Signal | Actual Pct Green Cells | Normalized Pct Green Cells | Red Signal | Actual Pct Red Cells | Normalized Pct Red Cells |
|       |       |      | 0.1 uM           | 87.58        | 0.80                   | 18.19                      | 69.98      | 0.01                 | -68.87                   |
|       |       |      | 1 uM             | 95.85        | 0.86                   | 195.06                     | 64.68      | 0.02                 | -38.25                   |
| 10 uM | 96.87 | 0.92 | 101.80           | 71.10        | 0.08                   | -17.77                     |            |                      |                          |

Compound

Normalized Values (A and B Sets)

Responses

| IU1   |       |      | Average Response |              |                        |                            |            |                      |                          |
|-------|-------|------|------------------|--------------|------------------------|----------------------------|------------|----------------------|--------------------------|
|       |       |      | Dose             | Green Signal | Actual Pct Green Cells | Normalized Pct Green Cells | Red Signal | Actual Pct Red Cells | Normalized Pct Red Cells |
|       |       |      | 0.1 uM           | 98.42        | 0.87                   | 58.49                      | 84.64      | 0.06                 | -34.73                   |
|       |       |      | 1 uM             | 94.92        | 0.78                   | 44.12                      | 95.15      | 0.11                 | -12.73                   |
| 10 uM | 94.14 | 0.82 | 70.14            | 84.50        | 0.04                   | -44.44                     |            |                      |                          |

Compound

Normalized Values (A and B Sets)

Responses

| Ivabradine HCl |       |      | Average Response |              |                        |                            |            |                      |                          |
|----------------|-------|------|------------------|--------------|------------------------|----------------------------|------------|----------------------|--------------------------|
|                |       |      | Dose             | Green Signal | Actual Pct Green Cells | Normalized Pct Green Cells | Red Signal | Actual Pct Red Cells | Normalized Pct Red Cells |
|                |       |      | 0.1 uM           | 103.86       | 0.88                   | 100.39                     | 91.85      | 0.06                 | -37.26                   |
|                |       |      | 1 uM             | 100.76       | 0.86                   | 29.02                      | 104.02     | 0.09                 | -17.45                   |
| 10 uM          | 97.34 | 0.84 | 72.28            | 90.41        | 0.03                   | -40.98                     |            |                      |                          |

Compound

Normalized Values (A and B Sets)

Responses

| Ivacaftor (VX-770) |       |      | Average Response |              |                        |                            |            |                      |                          |
|--------------------|-------|------|------------------|--------------|------------------------|----------------------------|------------|----------------------|--------------------------|
|                    |       |      | Dose             | Green Signal | Actual Pct Green Cells | Normalized Pct Green Cells | Red Signal | Actual Pct Red Cells | Normalized Pct Red Cells |
|                    |       |      | 0.1 uM           | 92.21        | 0.87                   | 81.66                      | 84.04      | 0.04                 | -51.82                   |
|                    |       |      | 1 uM             | 95.65        | 0.83                   | 22.30                      | 79.40      | 0.03                 | -45.94                   |
| 10 uM              | 94.43 | 0.82 | 53.80            | 95.50        | 0.04                   | -36.59                     |            |                      |                          |

Compound

Normalized Values (A and B Sets)

Responses

| IWP-2 |        |      | Average Response |              |                        |                            |            |                      |                          |
|-------|--------|------|------------------|--------------|------------------------|----------------------------|------------|----------------------|--------------------------|
|       |        |      | Dose             | Green Signal | Actual Pct Green Cells | Normalized Pct Green Cells | Red Signal | Actual Pct Red Cells | Normalized Pct Red Cells |
|       |        |      | 0.1 uM           | 100.57       | 0.92                   | 161.16                     | 87.12      | 0.07                 | -28.45                   |
|       |        |      | 1 uM             | 104.12       | 0.84                   | 85.32                      | 91.30      | 0.12                 | -9.47                    |
| 10 uM | 106.13 | 0.89 | 133.30           | 83.30        | 0.07                   | -27.37                     |            |                      |                          |

Compound

Normalized Values (A and B Sets)

Responses

| IWR-1-endo | Percent Green Cells (AB) |  | Percent Red Cells (AB)  |  | Average Response |              |                        |                            |            |                      |                          |
|------------|--------------------------|--|-------------------------|--|------------------|--------------|------------------------|----------------------------|------------|----------------------|--------------------------|
|            | 100<br>Percent Response  |  | 100<br>Percent Response |  | Dose             | Green Signal | Actual Pct Green Cells | Normalized Pct Green Cells | Red Signal | Actual Pct Red Cells | Normalized Pct Red Cells |
|            | 0.1 uM 1 uM 10 uM        |  | 0.1 uM 1 uM 10 uM       |  | 0.1 uM           | 96.76        | 0.90                   | 37.86                      | 80.20      | 0.05                 | -40.10                   |
|            | concentration            |  | concentration           |  | 1 uM             | 89.18        | 0.71                   | -5.94                      | 97.58      | 0.11                 | -9.42                    |
|            |                          |  |                         |  | 10 uM            | 86.69        | 0.76                   | 15.04                      | 89.62      | 0.04                 | -39.78                   |

Compound

Normalized Values (A and B Sets)

Responses

| JIB-04 | Percent Green Cells (AB) |  | Percent Red Cells (AB)  |  | Average Response                                                                               |              |                        |                            |            |                      |                          |
|--------|--------------------------|--|-------------------------|--|------------------------------------------------------------------------------------------------|--------------|------------------------|----------------------------|------------|----------------------|--------------------------|
|        | 100<br>Percent Response  |  | 100<br>Percent Response |  | Dose                                                                                           | Green Signal | Actual Pct Green Cells | Normalized Pct Green Cells | Red Signal | Actual Pct Red Cells | Normalized Pct Red Cells |
|        | 0.1 uM 1 uM 10 uM        |  | 0.1 uM 1 uM 10 uM       |  | 0.1 uM                                                                                         | 92.56        | 0.84                   | 55.55                      | 83.72      | 0.04                 | -52.29                   |
|        | concentration            |  | concentration           |  | 1 uM                                                                                           | 95.57        | 0.87                   | 191.99                     | 75.48      | 0.02                 | -34.63                   |
|        |                          |  |                         |  | 10 uM <td>95.37</td> <td>0.85</td> <td>36.88</td> <td>111.08</td> <td>0.20</td> <td>34.89</td> | 95.37        | 0.85                   | 36.88                      | 111.08     | 0.20                 | 34.89                    |

Compound

Normalized Values (A and B Sets)

Responses

| JK 184 | Percent Green Cells (AB) |  | Percent Red Cells (AB)  |  | Average Response                                                                                |              |                        |                            |            |                      |                          |
|--------|--------------------------|--|-------------------------|--|-------------------------------------------------------------------------------------------------|--------------|------------------------|----------------------------|------------|----------------------|--------------------------|
|        | 100<br>Percent Response  |  | 100<br>Percent Response |  | Dose                                                                                            | Green Signal | Actual Pct Green Cells | Normalized Pct Green Cells | Red Signal | Actual Pct Red Cells | Normalized Pct Red Cells |
|        | 0.1 uM 1 uM 10 uM        |  | 0.1 uM 1 uM 10 uM       |  | 0.1 uM                                                                                          | 102.64       | 0.87                   | 77.08                      | 87.70      | 0.08                 | -25.15                   |
|        | concentration            |  | concentration           |  | 1 uM                                                                                            | 87.30        | 0.73                   | -41.06                     | 82.80      | 0.06                 | -23.25                   |
|        |                          |  |                         |  | 10 uM <td>108.82</td> <td>0.84</td> <td>34.17</td> <td>113.24</td> <td>0.23</td> <td>48.10</td> | 108.82       | 0.84                   | 34.17                      | 113.24     | 0.23                 | 48.10                    |

Compound

Normalized Values (A and B Sets)

Responses

| JNJ-7706621 | Percent Green Cells (AB) |  | Percent Red Cells (AB)  |  | Average Response                                                                                 |              |                        |                            |            |                      |                          |
|-------------|--------------------------|--|-------------------------|--|--------------------------------------------------------------------------------------------------|--------------|------------------------|----------------------------|------------|----------------------|--------------------------|
|             | 100<br>Percent Response  |  | 100<br>Percent Response |  | Dose                                                                                             | Green Signal | Actual Pct Green Cells | Normalized Pct Green Cells | Red Signal | Actual Pct Red Cells | Normalized Pct Red Cells |
|             | 0.1 uM 1 uM 10 uM        |  | 0.1 uM 1 uM 10 uM       |  | 0.1 uM                                                                                           | 94.81        | 0.88                   | 59.92                      | 101.11     | 0.07                 | -37.10                   |
|             | concentration            |  | concentration           |  | 1 uM                                                                                             | 99.09        | 0.85                   | 45.67                      | 78.64      | 0.03                 | -43.61                   |
|             |                          |  |                         |  | 10 uM <td>76.51</td> <td>0.57</td> <td>102.26</td> <td>100.22</td> <td>0.09</td> <td>-11.56</td> | 76.51        | 0.57                   | 102.26                     | 100.22     | 0.09                 | -11.56                   |

Compound

Normalized Values (A and B Sets)

Responses

| JNJ-7777120 | Percent Green Cells (AB) |  | Percent Red Cells (AB)  |  | Average Response                                                                               |              |                        |                            |            |                      |                          |
|-------------|--------------------------|--|-------------------------|--|------------------------------------------------------------------------------------------------|--------------|------------------------|----------------------------|------------|----------------------|--------------------------|
|             | 100<br>Percent Response  |  | 100<br>Percent Response |  | Dose                                                                                           | Green Signal | Actual Pct Green Cells | Normalized Pct Green Cells | Red Signal | Actual Pct Red Cells | Normalized Pct Red Cells |
|             | 0.1 uM 1 uM 10 uM        |  | 0.1 uM 1 uM 10 uM       |  | 0.1 uM                                                                                         | 86.76        | 0.82                   | -57.93                     | 51.34      | 0.00                 | -62.00                   |
|             | concentration            |  | concentration           |  | 1 uM                                                                                           | 86.74        | 0.75                   | 24.21                      | 90.55      | 0.05                 | -44.04                   |
|             |                          |  |                         |  | 10 uM <td>89.26</td> <td>0.79</td> <td>39.79</td> <td>65.51</td> <td>0.01</td> <td>-56.16</td> | 89.26        | 0.79                   | 39.79                      | 65.51      | 0.01                 | -56.16                   |



Compound

Normalized Values (A and B Sets)

Responses

| JNJ-26854165 (Serdemetan) | Percent Green Cells (AB) |  | Percent Red Cells (AB)  |       | Average Response |              |                        |                            |            |                      |                          |
|---------------------------|--------------------------|--|-------------------------|-------|------------------|--------------|------------------------|----------------------------|------------|----------------------|--------------------------|
|                           | 100<br>Percent Response  |  | 100<br>Percent Response |       | Dose             | Green Signal | Actual Pct Green Cells | Normalized Pct Green Cells | Red Signal | Actual Pct Red Cells | Normalized Pct Red Cells |
|                           | 0.1 uM 1 uM 10 uM        |  | 0.1 uM 1 uM 10 uM       |       | 0.1 uM           | 100.75       | 0.85                   | 87.20                      | 89.99      | 0.07                 | -35.98                   |
|                           | concentration            |  | concentration           |       | 1 uM             | 111.50       | 0.87                   | 78.13                      | 100.96     | 0.12                 | -2.13                    |
|                           |                          |  |                         | 10 uM | 114.88           | 0.88         | 108.04                 | 103.80                     | 0.09       | -15.52               |                          |

Compound

Normalized Values (A and B Sets)

Responses

| JNJ-38877605 | Percent Green Cells (AB) |  | Percent Red Cells (AB)  |                                                                                                | Average Response |              |                        |                            |            |                      |                          |
|--------------|--------------------------|--|-------------------------|------------------------------------------------------------------------------------------------|------------------|--------------|------------------------|----------------------------|------------|----------------------|--------------------------|
|              | 100<br>Percent Response  |  | 100<br>Percent Response |                                                                                                | Dose             | Green Signal | Actual Pct Green Cells | Normalized Pct Green Cells | Red Signal | Actual Pct Red Cells | Normalized Pct Red Cells |
|              | 0.1 uM 1 uM 10 uM        |  | 0.1 uM 1 uM 10 uM       |                                                                                                | 0.1 uM           | 92.31        | 0.85                   | 54.24                      | 73.52      | 0.02                 | -63.56                   |
|              | concentration            |  | concentration           |                                                                                                | 1 uM             | 101.03       | 0.85                   | 88.12                      | 84.75      | 0.05                 | -34.06                   |
|              |                          |  |                         | 10 uM <td>88.07</td> <td>0.76</td> <td>12.75</td> <td>85.11</td> <td>0.02</td> <td>-44.70</td> | 88.07            | 0.76         | 12.75                  | 85.11                      | 0.02       | -44.70               |                          |

Compound

Normalized Values (A and B Sets)

Responses

| JNK-IN-8 | Percent Green Cells (AB) |  | Percent Red Cells (AB)  |                                                                                                | Average Response |              |                        |                            |            |                      |                          |
|----------|--------------------------|--|-------------------------|------------------------------------------------------------------------------------------------|------------------|--------------|------------------------|----------------------------|------------|----------------------|--------------------------|
|          | 100<br>Percent Response  |  | 100<br>Percent Response |                                                                                                | Dose             | Green Signal | Actual Pct Green Cells | Normalized Pct Green Cells | Red Signal | Actual Pct Red Cells | Normalized Pct Red Cells |
|          | 0.1 uM 1 uM 10 uM        |  | 0.1 uM 1 uM 10 uM       |                                                                                                | 0.1 uM           | 95.96        | 0.89                   | 80.38                      | 94.67      | 0.10                 | -13.11                   |
|          | concentration            |  | concentration           |                                                                                                | 1 uM             | 102.46       | 0.83                   | 81.30                      | 86.42      | 0.05                 | -40.24                   |
|          |                          |  |                         | 10 uM <td>96.39</td> <td>0.71</td> <td>-95.54</td> <td>91.97</td> <td>0.11</td> <td>-7.35</td> | 96.39            | 0.71         | -95.54                 | 91.97                      | 0.11       | -7.35                |                          |

Compound

Normalized Values (A and B Sets)

Responses

| JSH-23 | Percent Green Cells (AB) |  | Percent Red Cells (AB)  |                                                                                               | Average Response |              |                        |                            |            |                      |                          |
|--------|--------------------------|--|-------------------------|-----------------------------------------------------------------------------------------------|------------------|--------------|------------------------|----------------------------|------------|----------------------|--------------------------|
|        | 100<br>Percent Response  |  | 100<br>Percent Response |                                                                                               | Dose             | Green Signal | Actual Pct Green Cells | Normalized Pct Green Cells | Red Signal | Actual Pct Red Cells | Normalized Pct Red Cells |
|        | 0.1 uM 1 uM 10 uM        |  | 0.1 uM 1 uM 10 uM       |                                                                                               | 0.1 uM           | 86.32        | 0.79                   | 10.22                      | 71.93      | 0.02                 | -64.62                   |
|        | concentration            |  | concentration           |                                                                                               | 1 uM             | 97.59        | 0.85                   | 222.30                     | 100.30     | 0.10                 | 8.02                     |
|        |                          |  |                         | 10 uM <td>85.55</td> <td>0.82</td> <td>7.98</td> <td>61.93</td> <td>0.01</td> <td>-45.19</td> | 85.55            | 0.82         | 7.98                   | 61.93                      | 0.01       | -45.19               |                          |

Compound

Normalized Values (A and B Sets)

Responses

| JTC-801 | Percent Green Cells (AB) |  | Percent Red Cells (AB)  |                                                                                                | Average Response |              |                        |                            |            |                      |                          |
|---------|--------------------------|--|-------------------------|------------------------------------------------------------------------------------------------|------------------|--------------|------------------------|----------------------------|------------|----------------------|--------------------------|
|         | 100<br>Percent Response  |  | 100<br>Percent Response |                                                                                                | Dose             | Green Signal | Actual Pct Green Cells | Normalized Pct Green Cells | Red Signal | Actual Pct Red Cells | Normalized Pct Red Cells |
|         | 0.1 uM 1 uM 10 uM        |  | 0.1 uM 1 uM 10 uM       |                                                                                                | 0.1 uM           | 110.84       | 0.93                   | 139.29                     | 95.68      | 0.08                 | -21.61                   |
|         | concentration            |  | concentration           |                                                                                                | 1 uM             | 102.19       | 0.89                   | 111.45                     | 74.69      | 0.03                 | -35.23                   |
|         |                          |  |                         | 10 uM <td>91.95</td> <td>0.83</td> <td>22.97</td> <td>95.25</td> <td>0.07</td> <td>-20.02</td> | 91.95            | 0.83         | 22.97                  | 95.25                      | 0.07       | -20.02               |                          |

Compound

Normalized Values (A and B Sets)

Responses

| JZL 184 |       |      | Average Response |              |                        |                            |            |                      |                          |
|---------|-------|------|------------------|--------------|------------------------|----------------------------|------------|----------------------|--------------------------|
|         |       |      | Dose             | Green Signal | Actual Pct Green Cells | Normalized Pct Green Cells | Red Signal | Actual Pct Red Cells | Normalized Pct Red Cells |
|         |       |      | 0.1 uM           | 82.37        | 0.65                   | -97.34                     | 83.21      | 0.04                 | -46.80                   |
|         |       |      | 1 uM             | 97.38        | 0.83                   | 101.35                     | 88.58      | 0.07                 | -7.33                    |
| 10 uM   | 81.99 | 0.76 | -42.07           | 56.39        | 0.01                   | -47.28                     |            |                      |                          |

Compound

Normalized Values (A and B Sets)

Responses

| JZL184 |       |      | Average Response |              |                        |                            |            |                      |                          |
|--------|-------|------|------------------|--------------|------------------------|----------------------------|------------|----------------------|--------------------------|
|        |       |      | Dose             | Green Signal | Actual Pct Green Cells | Normalized Pct Green Cells | Red Signal | Actual Pct Red Cells | Normalized Pct Red Cells |
|        |       |      | 0.1 uM           | 89.59        | 0.81                   | -207.63                    | 84.42      | 0.09                 | -19.85                   |
|        |       |      | 1 uM             | 66.25        | 0.43                   | -201.21                    | 84.25      | 0.08                 | -26.29                   |
| 10 uM  | 97.93 | 0.82 | 84.93            | 88.63        | 0.08                   | -21.00                     |            |                      |                          |

Compound

Normalized Values (A and B Sets)

Responses

| Kaempferol |        |      | Average Response |              |                        |                            |            |                      |                          |
|------------|--------|------|------------------|--------------|------------------------|----------------------------|------------|----------------------|--------------------------|
|            |        |      | Dose             | Green Signal | Actual Pct Green Cells | Normalized Pct Green Cells | Red Signal | Actual Pct Red Cells | Normalized Pct Red Cells |
|            |        |      | 0.1 uM           | 87.37        | 0.87                   | 74.86                      | 78.93      | 0.04                 | -37.69                   |
|            |        |      | 1 uM             | 102.56       | 0.88                   | 91.76                      | 95.85      | 0.11                 | -7.10                    |
| 10 uM      | 103.84 | 0.93 | 245.65           | 88.64        | 0.07                   | -27.27                     |            |                      |                          |

Compound

Normalized Values (A and B Sets)

Responses

| Ki8751 |       |      | Average Response |              |                        |                            |            |                      |                          |
|--------|-------|------|------------------|--------------|------------------------|----------------------------|------------|----------------------|--------------------------|
|        |       |      | Dose             | Green Signal | Actual Pct Green Cells | Normalized Pct Green Cells | Red Signal | Actual Pct Red Cells | Normalized Pct Red Cells |
|        |       |      | 0.1 uM           | 89.72        | 0.81                   | 19.13                      | 97.58      | 0.08                 | -32.01                   |
|        |       |      | 1 uM             | 102.15       | 0.91                   | 106.78                     | 101.70     | 0.10                 | -14.00                   |
| 10 uM  | 92.87 | 0.77 | 29.07            | 96.19        | 0.07                   | -25.04                     |            |                      |                          |

Compound

Normalized Values (A and B Sets)

Responses

| Ki16198 |       |      | Average Response |              |                        |                            |            |                      |                          |
|---------|-------|------|------------------|--------------|------------------------|----------------------------|------------|----------------------|--------------------------|
|         |       |      | Dose             | Green Signal | Actual Pct Green Cells | Normalized Pct Green Cells | Red Signal | Actual Pct Red Cells | Normalized Pct Red Cells |
|         |       |      | 0.1 uM           | 87.69        | 0.86                   | -30.68                     | 57.43      | 0.01                 | -59.44                   |
|         |       |      | 1 uM             | 88.25        | 0.77                   | 37.50                      | 77.69      | 0.03                 | -54.31                   |
| 10 uM   | 98.99 | 0.90 | 128.37           | 59.00        | 0.01                   | -58.91                     |            |                      |                          |

Compound

Normalized Values (A and B Sets)

Responses

| Ki16425 | Percent Green Cells (AB) |    | Percent Red Cells (AB) |       | Average Response |              |                        |                            |            |                      |                          |
|---------|--------------------------|----|------------------------|-------|------------------|--------------|------------------------|----------------------------|------------|----------------------|--------------------------|
|         | Percent Response         |    | Percent Response       |       | Dose             | Green Signal | Actual Pct Green Cells | Normalized Pct Green Cells | Red Signal | Actual Pct Red Cells | Normalized Pct Red Cells |
|         | 100                      |    | 100                    |       | 0.1 uM           | 100.29       | 0.89                   | 91.70                      | 69.16      | 0.01                 | -66.78                   |
|         | 75                       | 85 | 0                      | 0     | 1 uM             | 71.74        | 0.52                   | 407.34                     | 69.35      | 0.02                 | -46.49                   |
| 0       | 0                        | 0  | 0                      | 10 uM | 82.65            | 0.74         | 17.06                  | 99.62                      | 0.04       | -34.89               |                          |

Compound

Normalized Values (A and B Sets)

Responses

| KPT-185 | Percent Green Cells (AB) |    | Percent Red Cells (AB) |       | Average Response |              |                        |                            |            |                      |                          |
|---------|--------------------------|----|------------------------|-------|------------------|--------------|------------------------|----------------------------|------------|----------------------|--------------------------|
|         | Percent Response         |    | Percent Response       |       | Dose             | Green Signal | Actual Pct Green Cells | Normalized Pct Green Cells | Red Signal | Actual Pct Red Cells | Normalized Pct Red Cells |
|         | 75                       |    | 100                    |       | 0.1 uM           | 101.86       | 0.84                   | -79.67                     | 108.32     | 0.17                 | 24.54                    |
|         | 60                       | 70 | 60                     | 15    | 1 uM             | 90.82        | 0.70                   | -27.00                     | 100.35     | 0.13                 | -0.33                    |
| 0       | 0                        | 0  | 10                     | 10 uM | 89.55            | 0.73         | -92.56                 | 89.94                      | 0.10       | -12.36               |                          |

Compound

Normalized Values (A and B Sets)

Responses

| KPT-276 | Percent Green Cells (AB) |    | Percent Red Cells (AB) |       | Average Response |              |                        |                            |            |                      |                          |
|---------|--------------------------|----|------------------------|-------|------------------|--------------|------------------------|----------------------------|------------|----------------------|--------------------------|
|         | Percent Response         |    | Percent Response       |       | Dose             | Green Signal | Actual Pct Green Cells | Normalized Pct Green Cells | Red Signal | Actual Pct Red Cells | Normalized Pct Red Cells |
|         | 100                      |    | 100                    |       | 0.1 uM           | 112.31       | 0.92                   | 127.77                     | 114.93     | 0.18                 | 39.50                    |
|         | 100                      | 40 | 100                    | 0     | 1 uM             | 96.43        | 0.88                   | 173.09                     | 85.67      | 0.06                 | -20.02                   |
| 0       | 65                       | 0  | 0                      | 10 uM | 83.16            | 0.72         | -75.18                 | 68.51                      | 0.05       | -31.16               |                          |

Compound

Normalized Values (A and B Sets)

Responses

| KU-60019 | Percent Green Cells (AB) |    | Percent Red Cells (AB) |       | Average Response |              |                        |                            |            |                      |                          |
|----------|--------------------------|----|------------------------|-------|------------------|--------------|------------------------|----------------------------|------------|----------------------|--------------------------|
|          | Percent Response         |    | Percent Response       |       | Dose             | Green Signal | Actual Pct Green Cells | Normalized Pct Green Cells | Red Signal | Actual Pct Red Cells | Normalized Pct Red Cells |
|          | 75                       |    | 100                    |       | 0.1 uM           | 113.14       | 0.92                   | 104.32                     | 90.86      | 0.07                 | -36.89                   |
|          | 100                      | 30 | 100                    | 10    | 1 uM             | 103.93       | 0.85                   | 83.63                      | 99.08      | 0.10                 | -13.02                   |
| 0        | 100                      | 0  | 30                     | 10 uM | 92.19            | 0.73         | -11.72                 | 129.70                     | 0.17       | 21.30                |                          |

Compound

Normalized Values (A and B Sets)

Responses

| KU-0063794 | Percent Green Cells (AB) |   | Percent Red Cells (AB) |       | Average Response |              |                        |                            |            |                      |                          |
|------------|--------------------------|---|------------------------|-------|------------------|--------------|------------------------|----------------------------|------------|----------------------|--------------------------|
|            | Percent Response         |   | Percent Response       |       | Dose             | Green Signal | Actual Pct Green Cells | Normalized Pct Green Cells | Red Signal | Actual Pct Red Cells | Normalized Pct Red Cells |
|            | 100                      |   | 0                      |       | 0.1 uM           | 93.84        | 0.87                   | 87.60                      | 70.31      | 0.02                 | -61.52                   |
|            | 45                       | 0 | 0                      | 0     | 1 uM             | 83.22        | 0.74                   | -43.86                     | 94.83      | 0.04                 | -36.86                   |
| 0          | 0                        | 0 | 0                      | 10 uM | 76.06            | 0.68         | -32.05                 | 114.42                     | 0.08       | -22.54               |                          |

Compound

Normalized Values (A and B Sets)

Responses

| KW-2449 | Percent Green Cells (AB) |      | Percent Red Cells (AB) |        | Average Response |       |        |              |                        |                            |            |                      |                          |
|---------|--------------------------|------|------------------------|--------|------------------|-------|--------|--------------|------------------------|----------------------------|------------|----------------------|--------------------------|
|         | 0.1 uM                   | 1 uM | 10 uM                  | 0.1 uM | 1 uM             | 10 uM | Dose   | Green Signal | Actual Pct Green Cells | Normalized Pct Green Cells | Red Signal | Actual Pct Red Cells | Normalized Pct Red Cells |
|         | 70                       | 80   | 100                    | 0      | 0                | 0     | 0.1 uM | 92.80        | 0.87                   | 75.95                      | 68.60      | 0.02                 | -44.75                   |
|         |                          |      |                        |        |                  |       | 1 uM   | 101.18       | 0.89                   | 103.08                     | 76.49      | 0.02                 | -45.46                   |
|         |                          |      |                        |        |                  |       | 10 uM  | 101.29       | 0.94                   | 422.88                     | 92.93      | 0.05                 | -32.68                   |

Compound

Normalized Values (A and B Sets)

Responses

| KW-2478 | Percent Green Cells (AB) |      | Percent Red Cells (AB) |        | Average Response |       |        |              |                        |                            |            |                      |                          |
|---------|--------------------------|------|------------------------|--------|------------------|-------|--------|--------------|------------------------|----------------------------|------------|----------------------|--------------------------|
|         | 0.1 uM                   | 1 uM | 10 uM                  | 0.1 uM | 1 uM             | 10 uM | Dose   | Green Signal | Actual Pct Green Cells | Normalized Pct Green Cells | Red Signal | Actual Pct Red Cells | Normalized Pct Red Cells |
|         | 100                      | 90   | 100                    | 0      | 0                | 0     | 0.1 uM | 97.33        | 0.90                   | 109.07                     | 83.71      | 0.04                 | -36.33                   |
|         |                          |      |                        |        |                  |       | 1 uM   | 83.66        | 0.66                   | -21.64                     | 81.24      | 0.05                 | -31.76                   |
|         |                          |      |                        |        |                  |       | 10 uM  | 135.09       | 0.90                   | -81.46                     | 128.72     | 0.21                 | 40.75                    |

Compound

Normalized Values (A and B Sets)

Responses

| KX2-391 | Percent Green Cells (AB) |      | Percent Red Cells (AB) |        | Average Response |       |        |              |                        |                            |            |                      |                          |
|---------|--------------------------|------|------------------------|--------|------------------|-------|--------|--------------|------------------------|----------------------------|------------|----------------------|--------------------------|
|         | 0.1 uM                   | 1 uM | 10 uM                  | 0.1 uM | 1 uM             | 10 uM | Dose   | Green Signal | Actual Pct Green Cells | Normalized Pct Green Cells | Red Signal | Actual Pct Red Cells | Normalized Pct Red Cells |
|         | 100                      | 20   | 75                     | 100    | 80               | 30    | 0.1 uM | 113.97       | 0.90                   | 109.83                     | 79.23      | 0.06                 | -27.34                   |
|         |                          |      |                        |        |                  |       | 1 uM   | 115.56       | 0.78                   | 45.30                      | 128.97     | 0.25                 | 53.01                    |
|         |                          |      |                        |        |                  |       | 10 uM  | 91.88        | 0.68                   | 1279.61                    | 92.15      | 0.14                 | 8.10                     |

Compound

Normalized Values (A and B Sets)

Responses

| KY02111 | Percent Green Cells (AB) |      | Percent Red Cells (AB) |        | Average Response |       |        |              |                        |                            |            |                      |                          |
|---------|--------------------------|------|------------------------|--------|------------------|-------|--------|--------------|------------------------|----------------------------|------------|----------------------|--------------------------|
|         | 0.1 uM                   | 1 uM | 10 uM                  | 0.1 uM | 1 uM             | 10 uM | Dose   | Green Signal | Actual Pct Green Cells | Normalized Pct Green Cells | Red Signal | Actual Pct Red Cells | Normalized Pct Red Cells |
|         | 15                       | 60   | 100                    | 15     | 15               | 10    | 0.1 uM | 84.60        | 0.80                   | -                          | 90.18      | 0.09                 | -17.76                   |
|         |                          |      |                        |        |                  |       | 1 uM   | 92.96        | 0.76                   | 31.78                      | 81.69      | 0.06                 | -37.91                   |
|         |                          |      |                        |        |                  |       | 10 uM  | 113.21       | 0.93                   | 144.17                     | 98.62      | 0.10                 | -9.88                    |

Compound

Normalized Values (A and B Sets)

Responses

| L-(+)-Rhamnose Monohydrate | Percent Green Cells (AB) |      | Percent Red Cells (AB) |        | Average Response |       |        |              |                        |                            |            |                      |                          |
|----------------------------|--------------------------|------|------------------------|--------|------------------|-------|--------|--------------|------------------------|----------------------------|------------|----------------------|--------------------------|
|                            | 0.1 uM                   | 1 uM | 10 uM                  | 0.1 uM | 1 uM             | 10 uM | Dose   | Green Signal | Actual Pct Green Cells | Normalized Pct Green Cells | Red Signal | Actual Pct Red Cells | Normalized Pct Red Cells |
|                            | 10                       | 100  | 80                     | 0      | 0                | 0     | 0.1 uM | 92.70        | 0.87                   | 86.51                      | 63.05      | 0.01                 | -50.24                   |
|                            |                          |      |                        |        |                  |       | 1 uM   | 90.40        | 0.76                   | 31.11                      | 82.66      | 0.04                 | -39.94                   |

| Compound | Normalized Values (A and B Sets) | Responses |       |      |         |       |      |        |
|----------|----------------------------------|-----------|-------|------|---------|-------|------|--------|
|          |                                  | 10 uM     | 85.06 | 0.81 | -571.80 | 69.38 | 0.01 | -54.14 |

| Compound            | Normalized Values (A and B Sets) | Responses               |              |                        |                            |            |                      |                          |
|---------------------|----------------------------------|-------------------------|--------------|------------------------|----------------------------|------------|----------------------|--------------------------|
| <b>L-Adrenaline</b> |                                  | <b>Average Response</b> |              |                        |                            |            |                      |                          |
|                     |                                  | Dose                    | Green Signal | Actual Pct Green Cells | Normalized Pct Green Cells | Red Signal | Actual Pct Red Cells | Normalized Pct Red Cells |
|                     |                                  | 0.1 uM                  | 91.50        | 0.86                   | 68.47                      | 101.44     | 0.09                 | -18.26                   |
|                     |                                  | 1 uM                    | 100.52       | 0.92                   | 180.80                     | 93.50      | 0.12                 | 22.05                    |
| 10 uM               | 94.93                            | 0.86                    | 49.67        | 91.26                  | 0.10                       | -9.88      |                      |                          |

| Compound                      | Normalized Values (A and B Sets) | Responses               |              |                        |                            |            |                      |                          |
|-------------------------------|----------------------------------|-------------------------|--------------|------------------------|----------------------------|------------|----------------------|--------------------------|
| <b>L-Ascorbyl 6-palmitate</b> |                                  | <b>Average Response</b> |              |                        |                            |            |                      |                          |
|                               |                                  | Dose                    | Green Signal | Actual Pct Green Cells | Normalized Pct Green Cells | Red Signal | Actual Pct Red Cells | Normalized Pct Red Cells |
|                               |                                  | 0.1 uM                  | 103.30       | 0.93                   | 141.59                     | 99.80      | 0.08                 | -20.96                   |
|                               |                                  | 1 uM                    | 101.61       | 0.92                   | -45.52                     | 90.91      | 0.08                 | -2.53                    |
| 10 uM                         | 85.99                            | 0.85                    | 38.84        | 78.24                  | 0.04                       | -35.64     |                      |                          |

| Compound     | Normalized Values (A and B Sets) | Responses               |              |                        |                            |            |                      |                          |
|--------------|----------------------------------|-------------------------|--------------|------------------------|----------------------------|------------|----------------------|--------------------------|
| <b>L-NNA</b> |                                  | <b>Average Response</b> |              |                        |                            |            |                      |                          |
|              |                                  | Dose                    | Green Signal | Actual Pct Green Cells | Normalized Pct Green Cells | Red Signal | Actual Pct Red Cells | Normalized Pct Red Cells |
|              |                                  | 0.1 uM                  | 93.54        | 0.85                   | 67.03                      | 75.64      | 0.02                 | -62.01                   |
|              |                                  | 1 uM                    | 85.45        | 0.80                   | -323.70                    | 73.03      | 0.02                 | -39.30                   |
| 10 uM        | 70.93                            | 0.59                    | 192.11       | 80.18                  | 0.04                       | -33.56     |                      |                          |

| Compound        | Normalized Values (A and B Sets) | Responses               |              |                        |                            |            |                      |                          |
|-----------------|----------------------------------|-------------------------|--------------|------------------------|----------------------------|------------|----------------------|--------------------------|
| <b>Laetrile</b> |                                  | <b>Average Response</b> |              |                        |                            |            |                      |                          |
|                 |                                  | Dose                    | Green Signal | Actual Pct Green Cells | Normalized Pct Green Cells | Red Signal | Actual Pct Red Cells | Normalized Pct Red Cells |
|                 |                                  | 0.1 uM                  | 98.36        | 0.88                   | 82.05                      | 97.46      | 0.11                 | -1.29                    |
|                 |                                  | 1 uM                    | 94.36        | 0.79                   | 49.05                      | 85.12      | 0.05                 | -33.54                   |
| 10 uM           | 110.82                           | 0.96                    | 411.99       | 100.32                 | 0.09                       | -15.52     |                      |                          |

| Compound          | Normalized Values (A and B Sets) | Responses               |              |  |  |            |                      |
|-------------------|----------------------------------|-------------------------|--------------|--|--|------------|----------------------|
| <b>Lafutidine</b> |                                  | <b>Average Response</b> |              |  |  |            |                      |
|                   |                                  | Dose                    | Green Signal |  |  | Red Signal | Actual Pct Red Cells |

Compound

Normalized Values (A and B Sets)

Responses

|  |        |        |      |        |        |      |                        |                            |  |  |                          |
|--|--------|--------|------|--------|--------|------|------------------------|----------------------------|--|--|--------------------------|
|  |        |        |      |        |        |      | Actual Pct Green Cells | Normalized Pct Green Cells |  |  | Normalized Pct Red Cells |
|  | 0.1 uM | 105.38 | 0.91 | 100.73 | 81.76  | 0.04 | -51.56                 |                            |  |  |                          |
|  | 1 uM   | 108.03 | 0.90 | 116.82 | 105.57 | 0.09 | -14.61                 |                            |  |  |                          |
|  | 10 uM  | 108.24 | 0.86 | 88.86  | 110.31 | 0.10 | -12.90                 |                            |  |  |                          |

Compound

Normalized Values (A and B Sets)

Responses

|                                         |        |              |                        |                            |                         |                      |                          |  |  |  |  |
|-----------------------------------------|--------|--------------|------------------------|----------------------------|-------------------------|----------------------|--------------------------|--|--|--|--|
| <b>Lapatinib (GW-572016) Ditosylate</b> |        |              |                        |                            | <b>Average Response</b> |                      |                          |  |  |  |  |
|                                         | Dose   | Green Signal | Actual Pct Green Cells | Normalized Pct Green Cells | Red Signal              | Actual Pct Red Cells | Normalized Pct Red Cells |  |  |  |  |
|                                         | 0.1 uM | 101.64       | 0.89                   | 104.82                     | 100.83                  | 0.12                 | -0.31                    |  |  |  |  |
|                                         | 1 uM   | 101.92       | 0.82                   | 624.80                     | 103.80                  | 0.16                 | 25.24                    |  |  |  |  |
| 10 uM                                   | 122.56 | 0.98         | 161.66                 | 120.21                     | 0.26                    | 63.34                |                          |  |  |  |  |

Compound

Normalized Values (A and B Sets)

Responses

|                        |        |              |                        |                            |                         |                      |                          |  |  |  |  |
|------------------------|--------|--------------|------------------------|----------------------------|-------------------------|----------------------|--------------------------|--|--|--|--|
| <b>Lappaconite HBr</b> |        |              |                        |                            | <b>Average Response</b> |                      |                          |  |  |  |  |
|                        | Dose   | Green Signal | Actual Pct Green Cells | Normalized Pct Green Cells | Red Signal              | Actual Pct Red Cells | Normalized Pct Red Cells |  |  |  |  |
|                        | 0.1 uM | 92.09        | 0.86                   | 61.15                      | 92.85                   | 0.11                 | 1.79                     |  |  |  |  |
|                        | 1 uM   | 86.24        | 0.75                   | 25.22                      | 73.40                   | 0.02                 | -47.31                   |  |  |  |  |
| 10 uM                  | 90.10  | 0.85         | 4.53                   | 70.96                      | 0.02                    | -47.24               |                          |  |  |  |  |

Compound

Normalized Values (A and B Sets)

Responses

|                            |        |              |                        |                            |                         |                      |                          |  |  |  |  |
|----------------------------|--------|--------------|------------------------|----------------------------|-------------------------|----------------------|--------------------------|--|--|--|--|
| <b>LAQ824 (Dacinostat)</b> |        |              |                        |                            | <b>Average Response</b> |                      |                          |  |  |  |  |
|                            | Dose   | Green Signal | Actual Pct Green Cells | Normalized Pct Green Cells | Red Signal              | Actual Pct Red Cells | Normalized Pct Red Cells |  |  |  |  |
|                            | 0.1 uM | 97.68        | 0.87                   | 31.62                      | 151.84                  | 0.21                 | 48.57                    |  |  |  |  |
|                            | 1 uM   | 117.82       | 0.92                   | 132.37                     | 121.69                  | 0.13                 | -0.19                    |  |  |  |  |
| 10 uM                      | 76.22  | 0.66         | -25.36                 | 161.40                     | 0.35                    | 98.19                |                          |  |  |  |  |

Compound

Normalized Values (A and B Sets)

Responses

|                   |        |              |                        |                            |                         |                      |                          |  |  |  |  |
|-------------------|--------|--------------|------------------------|----------------------------|-------------------------|----------------------|--------------------------|--|--|--|--|
| <b>Laquinimod</b> |        |              |                        |                            | <b>Average Response</b> |                      |                          |  |  |  |  |
|                   | Dose   | Green Signal | Actual Pct Green Cells | Normalized Pct Green Cells | Red Signal              | Actual Pct Red Cells | Normalized Pct Red Cells |  |  |  |  |
|                   | 0.1 uM | 103.70       | 0.94                   | 144.81                     | 110.38                  | 0.13                 | 7.26                     |  |  |  |  |
|                   | 1 uM   | 99.87        | 0.85                   | 74.99                      | 93.74                   | 0.07                 | -26.40                   |  |  |  |  |
| 10 uM             | 91.53  | 0.83         | 184.00                 | 99.31                      | 0.09                    | -17.54               |                          |  |  |  |  |

Compound

Normalized Values (A and B Sets)

Responses

| Latrepiridine |       |      | Average Response |              |                        |                            |            |                      |                          |
|---------------|-------|------|------------------|--------------|------------------------|----------------------------|------------|----------------------|--------------------------|
|               |       |      | Dose             | Green Signal | Actual Pct Green Cells | Normalized Pct Green Cells | Red Signal | Actual Pct Red Cells | Normalized Pct Red Cells |
|               |       |      | 0.1 uM           | 107.70       | 0.91                   | 131.91                     | 88.85      | 0.04                 | -52.24                   |
|               |       |      | 1 uM             | 94.75        | 0.84                   | 48.87                      | 95.57      | 0.07                 | -23.87                   |
| 10 uM         | 97.25 | 0.87 | 95.92            | 91.33        | 0.04                   | -37.60                     |            |                      |                          |

Compound

Normalized Values (A and B Sets)

Responses

| LDE225 (NVP-LDE225,Erismodegib) |       |      | Average Response |              |                        |                            |            |                      |                          |        |
|---------------------------------|-------|------|------------------|--------------|------------------------|----------------------------|------------|----------------------|--------------------------|--------|
|                                 |       |      | Dose             | Green Signal | Actual Pct Green Cells | Normalized Pct Green Cells | Red Signal | Actual Pct Red Cells | Normalized Pct Red Cells |        |
|                                 |       |      | 0.1 uM           | 68.67        | 0.59                   | -                          | 222.57     | 77.99                | 0.04                     | -36.57 |
|                                 |       |      | 1 uM             | 86.23        | 0.78                   | 42.27                      | 63.95      | 0.01                 | -51.17                   |        |
| 10 uM                           | 85.93 | 0.84 | -                | 244.53       | 72.76                  | 0.02                       | -51.25     |                      |                          |        |

Compound

Normalized Values (A and B Sets)

Responses

| LDK378 |       |      | Average Response |              |                        |                            |            |                      |                          |
|--------|-------|------|------------------|--------------|------------------------|----------------------------|------------|----------------------|--------------------------|
|        |       |      | Dose             | Green Signal | Actual Pct Green Cells | Normalized Pct Green Cells | Red Signal | Actual Pct Red Cells | Normalized Pct Red Cells |
|        |       |      | 0.1 uM           | 103.98       | 0.91                   | 71.04                      | 102.57     | 0.15                 | 14.83                    |
|        |       |      | 1 uM             | 107.51       | 0.89                   | 129.70                     | 86.11      | 0.08                 | -24.99                   |
| 10 uM  | 99.59 | 0.91 | 129.91           | 103.35       | 0.11                   | -5.86                      |            |                      |                          |

Compound

Normalized Values (A and B Sets)

Responses

| LDN-57444 |        |      | Average Response |              |                        |                            |            |                      |                          |
|-----------|--------|------|------------------|--------------|------------------------|----------------------------|------------|----------------------|--------------------------|
|           |        |      | Dose             | Green Signal | Actual Pct Green Cells | Normalized Pct Green Cells | Red Signal | Actual Pct Red Cells | Normalized Pct Red Cells |
|           |        |      | 0.1 uM           | 79.48        | 0.62                   | -27.09                     | 81.26      | 0.06                 | -35.29                   |
|           |        |      | 1 uM             | 95.30        | 0.80                   | 54.13                      | 98.51      | 0.09                 | -18.94                   |
| 10 uM     | 108.00 | 0.88 | 130.49           | 103.56       | 0.13                   | 5.53                       |            |                      |                          |

Compound

Normalized Values (A and B Sets)

Responses

| Lenvatinib (E7080) |        |      | Average Response |              |                        |                            |            |                      |                          |
|--------------------|--------|------|------------------|--------------|------------------------|----------------------------|------------|----------------------|--------------------------|
|                    |        |      | Dose             | Green Signal | Actual Pct Green Cells | Normalized Pct Green Cells | Red Signal | Actual Pct Red Cells | Normalized Pct Red Cells |
|                    |        |      | 0.1 uM           | 89.72        | 0.81                   | -14.89                     | 86.87      | 0.05                 | -48.94                   |
|                    |        |      | 1 uM             | 99.75        | 0.87                   | 57.59                      | 83.52      | 0.03                 | -42.32                   |
| 10 uM              | 105.19 | 0.89 | 110.85           | 92.67        | 0.04                   | -35.04                     |            |                      |                          |



Compound

Normalized Values (A and B Sets)

Responses

| Levobetaxolol HCl | Percent Green Cells (AB) |      | Percent Red Cells (AB) |        | Average Response |              |                        |                            |            |                      |                          |       |       |
|-------------------|--------------------------|------|------------------------|--------|------------------|--------------|------------------------|----------------------------|------------|----------------------|--------------------------|-------|-------|
|                   | Percent Response         |      | Percent Response       |        | Dose             | Green Signal | Actual Pct Green Cells | Normalized Pct Green Cells | Red Signal | Actual Pct Red Cells | Normalized Pct Red Cells |       |       |
|                   | concentration            |      | concentration          |        | 0.1 uM           | 1 uM         | 10 uM                  | 0.1 uM                     | 1 uM       | 10 uM                | 0.1 uM                   | 1 uM  | 10 uM |
|                   | 0.1 uM                   | 1 uM | 10 uM                  | 0.1 uM | 1 uM             | 10 uM        | 0.1 uM                 | 1 uM                       | 10 uM      | 0.1 uM               | 1 uM                     | 10 uM |       |
|                   | 58                       | 90   | 22                     | 100    | 26               | 30           | 30                     | 0                          | 0          | 0                    | 0                        | 0     |       |
|                   | 96.28                    | 0.88 | 73.88                  | 68.96  | 0.02             | -55.85       |                        |                            |            |                      |                          |       |       |
|                   | 85.08                    | 0.70 | -15.82                 | 73.11  | 0.03             | -51.70       |                        |                            |            |                      |                          |       |       |
|                   | 101.59                   | 0.85 | 130.72                 | 65.26  | 0.02             | -55.79       |                        |                            |            |                      |                          |       |       |

Compound

Normalized Values (A and B Sets)

Responses

| Levodropropizine | Percent Green Cells (AB) |      | Percent Red Cells (AB) |        | Average Response |              |                        |                            |            |                      |                          |       |       |
|------------------|--------------------------|------|------------------------|--------|------------------|--------------|------------------------|----------------------------|------------|----------------------|--------------------------|-------|-------|
|                  | Percent Response         |      | Percent Response       |        | Dose             | Green Signal | Actual Pct Green Cells | Normalized Pct Green Cells | Red Signal | Actual Pct Red Cells | Normalized Pct Red Cells |       |       |
|                  | concentration            |      | concentration          |        | 0.1 uM           | 1 uM         | 10 uM                  | 0.1 uM                     | 1 uM       | 10 uM                | 0.1 uM                   | 1 uM  | 10 uM |
|                  | 0.1 uM                   | 1 uM | 10 uM                  | 0.1 uM | 1 uM             | 10 uM        | 0.1 uM                 | 1 uM                       | 10 uM      | 0.1 uM               | 1 uM                     | 10 uM |       |
|                  | 100                      | 100  | 90                     | 100    | 55               | 55           | 55                     | 0                          | 0          | 0                    | 0                        | 0     |       |
|                  | 108.46                   | 0.93 | 208.58                 | 108.68 | 0.14             | 8.70         |                        |                            |            |                      |                          |       |       |
|                  | 104.10                   | 0.87 | 105.00                 | 96.39  | 0.10             | -18.17       |                        |                            |            |                      |                          |       |       |
|                  | 102.51                   | 0.86 | 124.83                 | 81.25  | 0.03             | -45.59       |                        |                            |            |                      |                          |       |       |

Compound

Normalized Values (A and B Sets)

Responses

| Levosimendan | Percent Green Cells (AB) |      | Percent Red Cells (AB) |        | Average Response |              |                        |                            |            |                      |                          |       |       |
|--------------|--------------------------|------|------------------------|--------|------------------|--------------|------------------------|----------------------------|------------|----------------------|--------------------------|-------|-------|
|              | Percent Response         |      | Percent Response       |        | Dose             | Green Signal | Actual Pct Green Cells | Normalized Pct Green Cells | Red Signal | Actual Pct Red Cells | Normalized Pct Red Cells |       |       |
|              | concentration            |      | concentration          |        | 0.1 uM           | 1 uM         | 10 uM                  | 0.1 uM                     | 1 uM       | 10 uM                | 0.1 uM                   | 1 uM  | 10 uM |
|              | 0.1 uM                   | 1 uM | 10 uM                  | 0.1 uM | 1 uM             | 10 uM        | 0.1 uM                 | 1 uM                       | 10 uM      | 0.1 uM               | 1 uM                     | 10 uM |       |
|              | 100                      | 100  | 85                     | 100    | 45               | 45           | 45                     | 0                          | 0          | 0                    | 0                        | 0     |       |
|              | 99.33                    | 0.84 | 45.74                  | 91.60  | 0.07             | -23.12       |                        |                            |            |                      |                          |       |       |
|              | 92.61                    | 0.75 | 32.38                  | 107.57 | 0.15             | 10.90        |                        |                            |            |                      |                          |       |       |
|              | 119.38                   | 0.95 | 271.91                 | 105.10 | 0.12             | 0.15         |                        |                            |            |                      |                          |       |       |

Compound

Normalized Values (A and B Sets)

Responses

| Licofelone | Percent Green Cells (AB) |      | Percent Red Cells (AB) |        | Average Response |              |                        |                            |            |                      |                          |       |       |
|------------|--------------------------|------|------------------------|--------|------------------|--------------|------------------------|----------------------------|------------|----------------------|--------------------------|-------|-------|
|            | Percent Response         |      | Percent Response       |        | Dose             | Green Signal | Actual Pct Green Cells | Normalized Pct Green Cells | Red Signal | Actual Pct Red Cells | Normalized Pct Red Cells |       |       |
|            | concentration            |      | concentration          |        | 0.1 uM           | 1 uM         | 10 uM                  | 0.1 uM                     | 1 uM       | 10 uM                | 0.1 uM                   | 1 uM  | 10 uM |
|            | 0.1 uM                   | 1 uM | 10 uM                  | 0.1 uM | 1 uM             | 10 uM        | 0.1 uM                 | 1 uM                       | 10 uM      | 0.1 uM               | 1 uM                     | 10 uM |       |
|            | 60                       | 60   | 100                    | 22     | 22               | 22           | 0                      | 0                          | 0          | 0                    | 0                        | 0     |       |
|            | 89.23                    | 0.80 | 20.02                  | 88.97  | 0.04             | -49.84       |                        |                            |            |                      |                          |       |       |
|            | 70.30                    | 0.53 | 2199.04                | 73.09  | 0.02             | -39.88       |                        |                            |            |                      |                          |       |       |
|            | 90.31                    | 0.85 | 39.11                  | 86.68  | 0.09             | -12.48       |                        |                            |            |                      |                          |       |       |

Compound

Normalized Values (A and B Sets)

Responses

| Linagliptin | Percent Green Cells (AB) |      | Percent Red Cells (AB) |        | Average Response |              |                        |                            |            |                      |                          |       |       |
|-------------|--------------------------|------|------------------------|--------|------------------|--------------|------------------------|----------------------------|------------|----------------------|--------------------------|-------|-------|
|             | Percent Response         |      | Percent Response       |        | Dose             | Green Signal | Actual Pct Green Cells | Normalized Pct Green Cells | Red Signal | Actual Pct Red Cells | Normalized Pct Red Cells |       |       |
|             | concentration            |      | concentration          |        | 0.1 uM           | 1 uM         | 10 uM                  | 0.1 uM                     | 1 uM       | 10 uM                | 0.1 uM                   | 1 uM  | 10 uM |
|             | 0.1 uM                   | 1 uM | 10 uM                  | 0.1 uM | 1 uM             | 10 uM        | 0.1 uM                 | 1 uM                       | 10 uM      | 0.1 uM               | 1 uM                     | 10 uM |       |
|             | 100                      | 100  | 22                     | 100    | 56               | 56           | 56                     | 0                          | 0          | 0                    | 0                        | 0     |       |
|             | 99.10                    | 0.89 | 56.37                  | 88.21  | 0.07             | -27.39       |                        |                            |            |                      |                          |       |       |
|             | 95.92                    | 0.80 | 61.04                  | 75.99  | 0.02             | -57.99       |                        |                            |            |                      |                          |       |       |
|             | 83.95                    | 0.71 | -72.38                 | 79.00  | 0.02             | -54.85       |                        |                            |            |                      |                          |       |       |

Compound

Normalized Values (A and B Sets)

Responses

| Lincomycin HCl | Percent Green Cells (AB) |  | Percent Red Cells (AB) |  | Average Response |              |                        |                            |            |                      |                          |
|----------------|--------------------------|--|------------------------|--|------------------|--------------|------------------------|----------------------------|------------|----------------------|--------------------------|
|                | Percent Response         |  | Percent Response       |  | Dose             | Green Signal | Actual Pct Green Cells | Normalized Pct Green Cells | Red Signal | Actual Pct Red Cells | Normalized Pct Red Cells |
|                | 100                      |  | 100                    |  | 0.1 uM           | 75.08        | 0.67                   | 117.45                     | 81.74      | 0.04                 | -36.26                   |
|                | 0                        |  | 0                      |  | 1 uM             | 101.14       | 0.84                   | 76.01                      | 107.67     | 0.15                 | 10.13                    |
|                | 0.1 uM                   |  | 0.1 uM                 |  | 10 uM            | 88.36        | 0.81                   | 750.47                     | 102.66     | 0.10                 | -9.62                    |
|                | 1 uM                     |  | 1 uM                   |  |                  |              |                        |                            |            |                      |                          |
|                | 10 uM                    |  | 10 uM                  |  |                  |              |                        |                            |            |                      |                          |

Compound

Normalized Values (A and B Sets)

Responses

| Liothyronine Sodium | Percent Green Cells (AB) |  | Percent Red Cells (AB) |  | Average Response |              |                        |                            |            |                      |                          |
|---------------------|--------------------------|--|------------------------|--|------------------|--------------|------------------------|----------------------------|------------|----------------------|--------------------------|
|                     | Percent Response         |  | Percent Response       |  | Dose             | Green Signal | Actual Pct Green Cells | Normalized Pct Green Cells | Red Signal | Actual Pct Red Cells | Normalized Pct Red Cells |
|                     | 100                      |  | 100                    |  | 0.1 uM           | 104.69       | 0.95                   | 224.64                     | 116.07     | 0.21                 | 44.43                    |
|                     | 0                        |  | 0                      |  | 1 uM             | 115.63       | 0.94                   | 162.48                     | 107.83     | 0.16                 | 15.17                    |
|                     | 0.1 uM                   |  | 0.1 uM                 |  | 10 uM            | 108.47       | 0.89                   | 159.33                     | 103.66     | 0.14                 | 10.93                    |
|                     | 1 uM                     |  | 1 uM                   |  |                  |              |                        |                            |            |                      |                          |
|                     | 10 uM                    |  | 10 uM                  |  |                  |              |                        |                            |            |                      |                          |

Compound

Normalized Values (A and B Sets)

Responses

| Lithium Citrate | Percent Green Cells (AB) |  | Percent Red Cells (AB) |  | Average Response |              |                        |                            |            |                      |                          |
|-----------------|--------------------------|--|------------------------|--|------------------|--------------|------------------------|----------------------------|------------|----------------------|--------------------------|
|                 | Percent Response         |  | Percent Response       |  | Dose             | Green Signal | Actual Pct Green Cells | Normalized Pct Green Cells | Red Signal | Actual Pct Red Cells | Normalized Pct Red Cells |
|                 | 100                      |  | 100                    |  | 0.1 uM           | 91.31        | 0.85                   | -2.60                      | 76.12      | 0.03                 | -45.97                   |
|                 | 0                        |  | 0                      |  | 1 uM             | 105.17       | 0.87                   | 109.77                     | 93.29      | 0.09                 | -22.40                   |
|                 | 0.1 uM                   |  | 0.1 uM                 |  | 10 uM            | 100.10       | 0.85                   | 86.79                      | 103.21     | 0.11                 | -4.64                    |
|                 | 1 uM                     |  | 1 uM                   |  |                  |              |                        |                            |            |                      |                          |
|                 | 10 uM                    |  | 10 uM                  |  |                  |              |                        |                            |            |                      |                          |

Compound

Normalized Values (A and B Sets)

Responses

| Lomeguatrib | Percent Green Cells (AB) |  | Percent Red Cells (AB) |  | Average Response |              |                        |                            |            |                      |                          |
|-------------|--------------------------|--|------------------------|--|------------------|--------------|------------------------|----------------------------|------------|----------------------|--------------------------|
|             | Percent Response         |  | Percent Response       |  | Dose             | Green Signal | Actual Pct Green Cells | Normalized Pct Green Cells | Red Signal | Actual Pct Red Cells | Normalized Pct Red Cells |
|             | 100                      |  | 100                    |  | 0.1 uM           | 93.53        | 0.84                   | 55.12                      | 72.90      | 0.01                 | -67.80                   |
|             | 0                        |  | 0                      |  | 1 uM             | 98.69        | 0.90                   | 98.10                      | 74.43      | 0.02                 | -35.85                   |
|             | 0.1 uM                   |  | 0.1 uM                 |  | 10 uM            | 84.60        | 0.80                   | -8.51                      | 64.36      | 0.01                 | -45.56                   |
|             | 1 uM                     |  | 1 uM                   |  |                  |              |                        |                            |            |                      |                          |
|             | 10 uM                    |  | 10 uM                  |  |                  |              |                        |                            |            |                      |                          |

Compound

Normalized Values (A and B Sets)

Responses

| Lomerizine HCl | Percent Green Cells (AB) |  | Percent Red Cells (AB) |  | Average Response |              |                        |                            |            |                      |                          |
|----------------|--------------------------|--|------------------------|--|------------------|--------------|------------------------|----------------------------|------------|----------------------|--------------------------|
|                | Percent Response         |  | Percent Response       |  | Dose             | Green Signal | Actual Pct Green Cells | Normalized Pct Green Cells | Red Signal | Actual Pct Red Cells | Normalized Pct Red Cells |
|                | 100                      |  | 100                    |  | 0.1 uM           | 69.78        | 0.54                   | 179.34                     | 72.82      | 0.03                 | -47.73                   |
|                | 0                        |  | 0                      |  | 1 uM             | 85.20        | 0.73                   | 4.77                       | 100.24     | 0.12                 | -7.71                    |
|                | 0.1 uM                   |  | 0.1 uM                 |  |                  |              |                        |                            |            |                      |                          |
|                | 1 uM                     |  | 1 uM                   |  |                  |              |                        |                            |            |                      |                          |
|                | 10 uM                    |  | 10 uM                  |  |                  |              |                        |                            |            |                      |                          |



Compound

Normalized Values (A and B Sets)

Responses

|  |        |        |      |       |                                              |  |  |  |  |  |  |        |      |        |
|--|--------|--------|------|-------|----------------------------------------------|--|--|--|--|--|--|--------|------|--------|
|  |        |        |      |       | Norm<br>alize<br>d Pct<br>Gree<br>n<br>Cells |  |  |  |  |  |  |        |      |        |
|  | 0.1 uM | 98.11  | 0.86 | 79.61 |                                              |  |  |  |  |  |  | 102.60 | 0.09 | -29.07 |
|  | 1 uM   | 100.21 | 0.85 | 76.42 |                                              |  |  |  |  |  |  | 107.21 | 0.10 | -10.66 |
|  | 10 uM  | 93.78  | 0.83 | 67.27 |                                              |  |  |  |  |  |  | 103.53 | 0.06 | -27.48 |

Compound

Normalized Values (A and B Sets)

Responses

|                                     |        |              |                        |                            |                         |                      |                          |  |  |  |  |  |
|-------------------------------------|--------|--------------|------------------------|----------------------------|-------------------------|----------------------|--------------------------|--|--|--|--|--|
| <b>Losartan Potassium (DuP 753)</b> |        |              |                        |                            | <b>Average Response</b> |                      |                          |  |  |  |  |  |
|                                     | Dose   | Green Signal | Actual Pct Green Cells | Normalized Pct Green Cells | Red Signal              | Actual Pct Red Cells | Normalized Pct Red Cells |  |  |  |  |  |
|                                     | 0.1 uM | 90.44        | 0.80                   | 22.91                      | 87.65                   | 0.05                 | -43.78                   |  |  |  |  |  |
|                                     | 1 uM   | 93.20        | 0.81                   | 12.67                      | 75.48                   | 0.02                 | -47.52                   |  |  |  |  |  |
| 10 uM                               | 94.12  | 0.83         | 70.77                  | 84.94                      | 0.02                    | -44.92               |                          |  |  |  |  |  |

Compound

Normalized Values (A and B Sets)

Responses

|                     |        |              |                        |                            |                         |                      |                          |  |  |  |  |  |
|---------------------|--------|--------------|------------------------|----------------------------|-------------------------|----------------------|--------------------------|--|--|--|--|--|
| <b>Lubiprostone</b> |        |              |                        |                            | <b>Average Response</b> |                      |                          |  |  |  |  |  |
|                     | Dose   | Green Signal | Actual Pct Green Cells | Normalized Pct Green Cells | Red Signal              | Actual Pct Red Cells | Normalized Pct Red Cells |  |  |  |  |  |
|                     | 0.1 uM | 75.49        | 0.57                   | 123.83                     | 84.62                   | 0.04                 | -49.33                   |  |  |  |  |  |
|                     | 1 uM   | 109.97       | 0.87                   | 90.14                      | 113.97                  | 0.17                 | 19.48                    |  |  |  |  |  |
| 10 uM               | 100.01 | 0.83         | 67.99                  | 103.56                     | 0.08                    | -22.10               |                          |  |  |  |  |  |

Compound

Normalized Values (A and B Sets)

Responses

|                     |        |              |                        |                            |                         |                      |                          |  |  |  |  |  |
|---------------------|--------|--------------|------------------------|----------------------------|-------------------------|----------------------|--------------------------|--|--|--|--|--|
| <b>Luliconazole</b> |        |              |                        |                            | <b>Average Response</b> |                      |                          |  |  |  |  |  |
|                     | Dose   | Green Signal | Actual Pct Green Cells | Normalized Pct Green Cells | Red Signal              | Actual Pct Red Cells | Normalized Pct Red Cells |  |  |  |  |  |
|                     | 0.1 uM | 92.66        | 0.81                   | 269.20                     | 104.65                  | 0.16                 | 16.95                    |  |  |  |  |  |
|                     | 1 uM   | 112.93       | 0.92                   | 146.75                     | 85.93                   | 0.06                 | -36.95                   |  |  |  |  |  |
| 10 uM               | 87.82  | 0.75         | -23.75                 | 94.47                      | 0.08                    | -18.50               |                          |  |  |  |  |  |

Compound

Normalized Values (A and B Sets)

Responses

|                    |        |              |                        |                            |                         |                      |                          |  |  |  |  |  |
|--------------------|--------|--------------|------------------------|----------------------------|-------------------------|----------------------|--------------------------|--|--|--|--|--|
| <b>Lumiracoxib</b> |        |              |                        |                            | <b>Average Response</b> |                      |                          |  |  |  |  |  |
|                    | Dose   | Green Signal | Actual Pct Green Cells | Normalized Pct Green Cells | Red Signal              | Actual Pct Red Cells | Normalized Pct Red Cells |  |  |  |  |  |
|                    | 0.1 uM | 80.60        | 0.79                   | -17.99                     | 75.32                   | 0.02                 | -53.67                   |  |  |  |  |  |
|                    | 1 uM   | 95.28        | 0.84                   | 83.91                      | 113.49                  | 0.15                 | 11.18                    |  |  |  |  |  |
| 10 uM              | 81.46  | 0.71         | 112.46                 | 100.91                     | 0.10                    | -8.17                |                          |  |  |  |  |  |

Compound

Normalized Values (A and B Sets)

Responses

| LY 320135 |       |      | Average Response |              |                        |                            |            |                      |                          |
|-----------|-------|------|------------------|--------------|------------------------|----------------------------|------------|----------------------|--------------------------|
|           |       |      | Dose             | Green Signal | Actual Pct Green Cells | Normalized Pct Green Cells | Red Signal | Actual Pct Red Cells | Normalized Pct Red Cells |
| 0.1 uM    | 76.34 | 0.62 | -                | 156.41       | 83.86                  | 0.04                       | -51.75     |                      |                          |
| 1 uM      | 89.86 | 0.80 | -                | 140.70       | 69.47                  | 0.02                       | -39.12     |                      |                          |
| 10 uM     | 88.39 | 0.85 | -                | 40.25        | 79.53                  | 0.04                       | -33.81     |                      |                          |

Compound

Normalized Values (A and B Sets)

Responses

| LY 333531 |       |      | Average Response |              |                        |                            |            |                      |                          |
|-----------|-------|------|------------------|--------------|------------------------|----------------------------|------------|----------------------|--------------------------|
|           |       |      | Dose             | Green Signal | Actual Pct Green Cells | Normalized Pct Green Cells | Red Signal | Actual Pct Red Cells | Normalized Pct Red Cells |
| 0.1 uM    | 99.71 | 0.92 | -                | 132.57       | 71.18                  | 0.02                       | -65.46     |                      |                          |
| 1 uM      | 91.28 | 0.84 | -                | 266.85       | 87.72                  | 0.07                       | -11.65     |                      |                          |
| 10 uM     | 59.37 | 0.47 | -                | 319.11       | 54.08                  | 0.01                       | -48.87     |                      |                          |

Compound

Normalized Values (A and B Sets)

Responses

| LY404039 |        |      | Average Response |              |                        |                            |            |                      |                          |
|----------|--------|------|------------------|--------------|------------------------|----------------------------|------------|----------------------|--------------------------|
|          |        |      | Dose             | Green Signal | Actual Pct Green Cells | Normalized Pct Green Cells | Red Signal | Actual Pct Red Cells | Normalized Pct Red Cells |
| 0.1 uM   | 77.54  | 0.64 | -                | 600.20       | 90.52                  | 0.08                       | -22.75     |                      |                          |
| 1 uM     | 101.06 | 0.84 | -                | 84.91        | 96.41                  | 0.10                       | -16.33     |                      |                          |
| 10 uM    | 97.30  | 0.84 | -                | 42.78        | 80.55                  | 0.03                       | -47.11     |                      |                          |

Compound

Normalized Values (A and B Sets)

Responses

| LY411575 |        |      | Average Response |              |                        |                            |            |                      |                          |
|----------|--------|------|------------------|--------------|------------------------|----------------------------|------------|----------------------|--------------------------|
|          |        |      | Dose             | Green Signal | Actual Pct Green Cells | Normalized Pct Green Cells | Red Signal | Actual Pct Red Cells | Normalized Pct Red Cells |
| 0.1 uM   | 107.65 | 0.92 | -                | 133.02       | 80.79                  | 0.03                       | -57.12     |                      |                          |
| 1 uM     | 101.09 | 0.88 | -                | 311.51       | 100.62                 | 0.12                       | 10.94      |                      |                          |
| 10 uM    | 98.35  | 0.87 | -                | 48.80        | 89.09                  | 0.07                       | -19.47     |                      |                          |

Compound

Normalized Values (A and B Sets)

Responses

| LY2109761 | Average Response |              |                        |                            |            |                      |                          |
|-----------|------------------|--------------|------------------------|----------------------------|------------|----------------------|--------------------------|
|           | Dose             | Green Signal | Actual Pct Green Cells | Normalized Pct Green Cells | Red Signal | Actual Pct Red Cells | Normalized Pct Red Cells |

Compound

Normalized Values (A and B Sets)

Responses

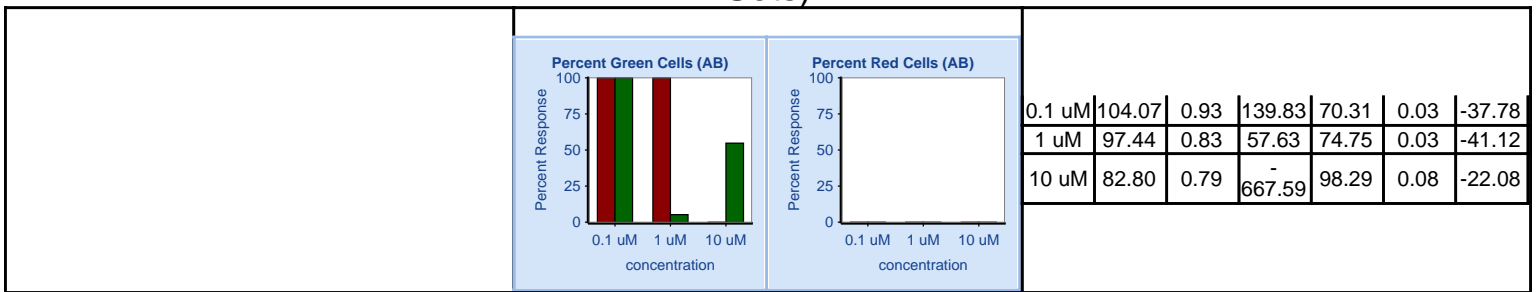

Compound

Normalized Values (A and B Sets)

Responses

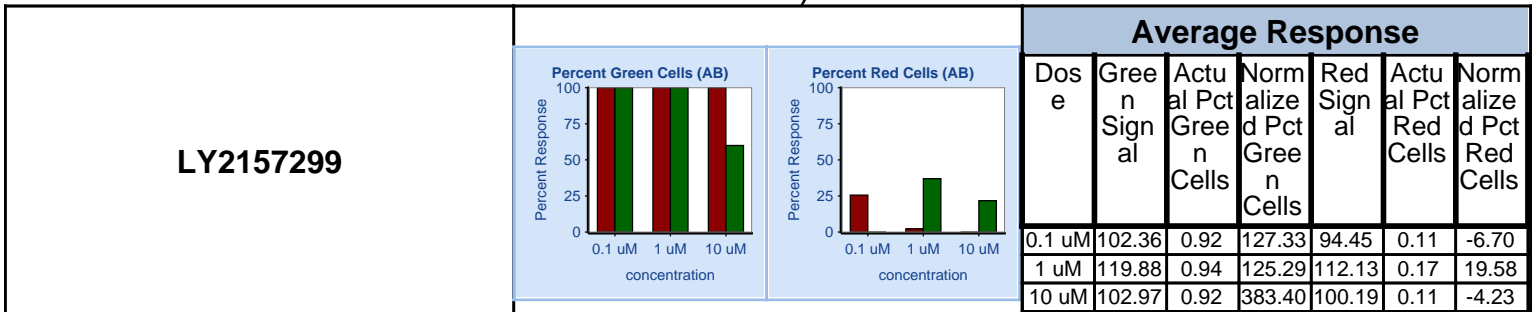

Compound

Normalized Values (A and B Sets)

Responses

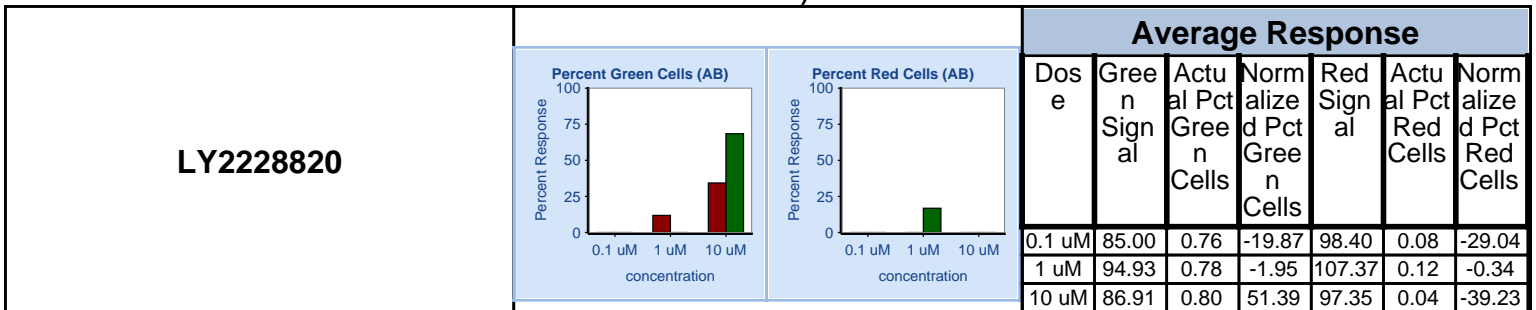

Compound

Normalized Values (A and B Sets)

Responses

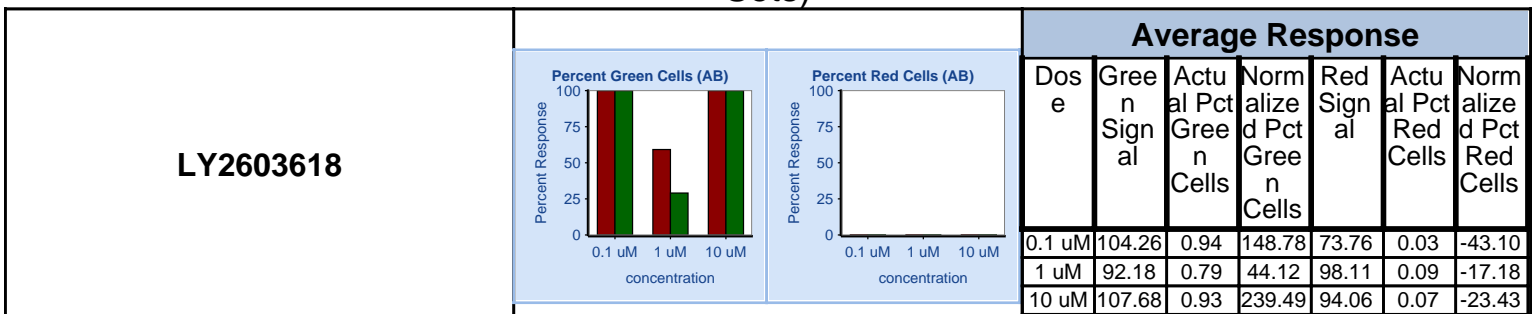

Compound

Normalized Values (A and B Sets)

Responses

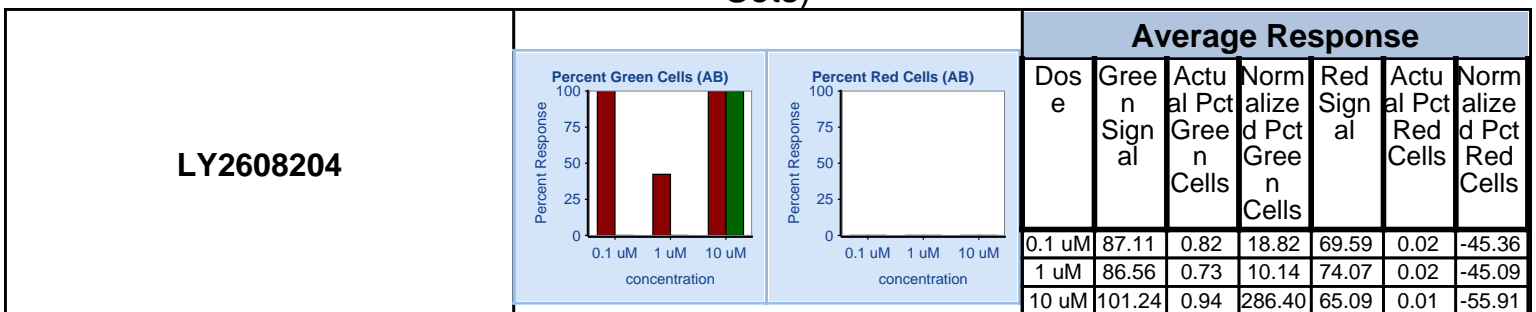

Compound

Normalized Values (A and B Sets)

Responses

| <b>LY2784544</b> |        | Average Response |              |                        |                            |            |                      |                          |
|------------------|--------|------------------|--------------|------------------------|----------------------------|------------|----------------------|--------------------------|
|                  |        | Dose             | Green Signal | Actual Pct Green Cells | Normalized Pct Green Cells | Red Signal | Actual Pct Red Cells | Normalized Pct Red Cells |
|                  |        | 0.1 uM           | 89.66        | 0.86                   | 65.03                      | 81.21      | 0.03                 | -40.55                   |
|                  |        | 1 uM             | 98.62        | 0.83                   | 59.81                      | 78.35      | 0.03                 | -41.73                   |
| 10 uM            | 123.90 | 0.93             | 219.53       | 100.08                 | 0.08                       | -22.08     |                      |                          |

Compound

Normalized Values (A and B Sets)

Responses

| <b>LY2811376</b> |       | Average Response |              |                        |                            |            |                      |                          |
|------------------|-------|------------------|--------------|------------------------|----------------------------|------------|----------------------|--------------------------|
|                  |       | Dose             | Green Signal | Actual Pct Green Cells | Normalized Pct Green Cells | Red Signal | Actual Pct Red Cells | Normalized Pct Red Cells |
|                  |       | 0.1 uM           | 103.38       | 0.94                   | 127.84                     | 85.44      | 0.03                 | -55.04                   |
|                  |       | 1 uM             | 84.05        | 0.70                   | -43.09                     | 93.37      | 0.06                 | -31.28                   |
| 10 uM            | 99.86 | 0.84             | 73.22        | 100.05                 | 0.06                       | -29.31     |                      |                          |

Compound

Normalized Values (A and B Sets)

Responses

| <b>LY2835219</b> |        | Average Response |              |                        |                            |            |                      |                          |
|------------------|--------|------------------|--------------|------------------------|----------------------------|------------|----------------------|--------------------------|
|                  |        | Dose             | Green Signal | Actual Pct Green Cells | Normalized Pct Green Cells | Red Signal | Actual Pct Red Cells | Normalized Pct Red Cells |
|                  |        | 0.1 uM           | 106.83       | 0.97                   | 295.29                     | 106.18     | 0.19                 | 37.32                    |
|                  |        | 1 uM             | 96.81        | 0.88                   | 114.58                     | 72.77      | 0.02                 | -56.83                   |
| 10 uM            | 126.77 | 0.93             | 150.74       | 94.52                  | 0.16                       | 16.70      |                      |                          |

Compound

Normalized Values (A and B Sets)

Responses

| <b>LY2886721</b> |       | Average Response |              |                        |                            |            |                      |                          |
|------------------|-------|------------------|--------------|------------------------|----------------------------|------------|----------------------|--------------------------|
|                  |       | Dose             | Green Signal | Actual Pct Green Cells | Normalized Pct Green Cells | Red Signal | Actual Pct Red Cells | Normalized Pct Red Cells |
|                  |       | 0.1 uM           | 75.99        | 0.69                   | 117.32                     | 84.15      | 0.05                 | -28.13                   |
|                  |       | 1 uM             | 91.31        | 0.81                   | 60.21                      | 65.40      | 0.01                 | -51.87                   |
| 10 uM            | 92.03 | 0.90             | 299.15       | 82.97                  | 0.04                       | -40.01     |                      |                          |

Compound

Normalized Values (A and B Sets)

Responses

| <b>M344</b> |        | Average Response |              |                        |                            |            |                      |                          |
|-------------|--------|------------------|--------------|------------------------|----------------------------|------------|----------------------|--------------------------|
|             |        | Dose             | Green Signal | Actual Pct Green Cells | Normalized Pct Green Cells | Red Signal | Actual Pct Red Cells | Normalized Pct Red Cells |
|             |        | 0.1 uM           | 94.78        | 0.85                   | 55.65                      | 77.56      | 0.04                 | -38.40                   |
|             |        | 1 uM             | 96.89        | 0.84                   | 67.93                      | 89.56      | 0.08                 | -18.45                   |
| 10 uM       | 121.82 | 0.94             | 502.48       | 82.74                  | 0.03                       | -45.44     |                      |                          |





Compound

Normalized Values (A and B Sets)

Responses

| Maraviroc | Percent Green Cells (AB) |  | Percent Red Cells (AB)  |  | Average Response |              |                        |                            |            |                      |                          |
|-----------|--------------------------|--|-------------------------|--|------------------|--------------|------------------------|----------------------------|------------|----------------------|--------------------------|
|           | 100<br>Percent Response  |  | 100<br>Percent Response |  | Dose             | Green Signal | Actual Pct Green Cells | Normalized Pct Green Cells | Red Signal | Actual Pct Red Cells | Normalized Pct Red Cells |
|           | 0.1 uM 1 uM 10 uM        |  | 0.1 uM 1 uM 10 uM       |  | 0.1 uM           | 109.29       | 0.91                   | 121.45                     | 85.76      | 0.05                 | -48.67                   |
|           | concentration            |  | concentration           |  | 1 uM             | 109.86       | 0.88                   | 115.23                     | 92.79      | 0.05                 | -33.09                   |
|           |                          |  |                         |  | 10 uM            | 92.72        | 0.77                   | 15.86                      | 117.65     | 0.12                 | -0.82                    |

Compound

Normalized Values (A and B Sets)

Responses

| Marbofloxacin | Percent Green Cells (AB) |  | Percent Red Cells (AB)  |  | Average Response |              |                        |                            |            |                      |                          |
|---------------|--------------------------|--|-------------------------|--|------------------|--------------|------------------------|----------------------------|------------|----------------------|--------------------------|
|               | 100<br>Percent Response  |  | 100<br>Percent Response |  | Dose             | Green Signal | Actual Pct Green Cells | Normalized Pct Green Cells | Red Signal | Actual Pct Red Cells | Normalized Pct Red Cells |
|               | 0.1 uM 1 uM 10 uM        |  | 0.1 uM 1 uM 10 uM       |  | 0.1 uM           | 97.79        | 0.88                   | 97.11                      | 78.25      | 0.02                 | -66.07                   |
|               | concentration            |  | concentration           |  | 1 uM             | 91.34        | 0.82                   | 98.43                      | 83.02      | 0.04                 | -26.98                   |
|               |                          |  |                         |  | 10 uM            | 104.87       | 0.94                   | 117.83                     | 91.73      | 0.08                 | -13.52                   |

Compound

Normalized Values (A and B Sets)

Responses

| MC1568 | Percent Green Cells (AB) |  | Percent Red Cells (AB)  |  | Average Response |              |                        |                            |            |                      |                          |
|--------|--------------------------|--|-------------------------|--|------------------|--------------|------------------------|----------------------------|------------|----------------------|--------------------------|
|        | 100<br>Percent Response  |  | 100<br>Percent Response |  | Dose             | Green Signal | Actual Pct Green Cells | Normalized Pct Green Cells | Red Signal | Actual Pct Red Cells | Normalized Pct Red Cells |
|        | 0.1 uM 1 uM 10 uM        |  | 0.1 uM 1 uM 10 uM       |  | 0.1 uM           | 102.89       | 0.90                   | 106.41                     | 103.46     | 0.10                 | -15.84                   |
|        | concentration            |  | concentration           |  | 1 uM             | 98.52        | 0.84                   | 73.55                      | 93.30      | 0.06                 | -29.66                   |
|        |                          |  |                         |  | 10 uM            | 115.83       | 0.92                   | 130.27                     | 109.61     | 0.09                 | -15.83                   |

Compound

Normalized Values (A and B Sets)

Responses

| Mdivi-1 | Percent Green Cells (AB) |  | Percent Red Cells (AB)  |  | Average Response |              |                        |                            |            |                      |                          |
|---------|--------------------------|--|-------------------------|--|------------------|--------------|------------------------|----------------------------|------------|----------------------|--------------------------|
|         | 100<br>Percent Response  |  | 100<br>Percent Response |  | Dose             | Green Signal | Actual Pct Green Cells | Normalized Pct Green Cells | Red Signal | Actual Pct Red Cells | Normalized Pct Red Cells |
|         | 0.1 uM 1 uM 10 uM        |  | 0.1 uM 1 uM 10 uM       |  | 0.1 uM           | 102.03       | 0.89                   | 85.83                      | 91.50      | 0.09                 | -19.81                   |
|         | concentration            |  | concentration           |  | 1 uM             | 103.95       | 0.89                   | 124.74                     | 105.98     | 0.14                 | 3.79                     |
|         |                          |  |                         |  | 10 uM            | 101.82       | 0.85                   | 119.10                     | 100.64     | 0.12                 | -1.91                    |

Compound

Normalized Values (A and B Sets)

Responses

| ME0328 | Percent Green Cells (AB) |  | Percent Red Cells (AB)  |  | Average Response |              |                        |                            |            |                      |                          |
|--------|--------------------------|--|-------------------------|--|------------------|--------------|------------------------|----------------------------|------------|----------------------|--------------------------|
|        | 100<br>Percent Response  |  | 100<br>Percent Response |  | Dose             | Green Signal | Actual Pct Green Cells | Normalized Pct Green Cells | Red Signal | Actual Pct Red Cells | Normalized Pct Red Cells |
|        | 0.1 uM 1 uM 10 uM        |  | 0.1 uM 1 uM 10 uM       |  | 0.1 uM           | 95.16        | 0.85                   | 71.08                      | 90.63      | 0.07                 | -30.73                   |
|        | concentration            |  | concentration           |  | 1 uM             | 103.75       | 0.89                   | -88.96                     | 90.32      | 0.09                 | -5.47                    |
|        |                          |  |                         |  | 10 uM            | 98.39        | 0.92                   | 100.32                     | 89.29      | 0.07                 | -17.99                   |

Compound

Normalized Values (A and B Sets)

Responses

| Compound             | Normalized Values (A and B Sets) |  | Average Response |              |                        |                            |            |                      |                          |
|----------------------|----------------------------------|--|------------------|--------------|------------------------|----------------------------|------------|----------------------|--------------------------|
|                      |                                  |  | Dose             | Green Signal | Actual Pct Green Cells | Normalized Pct Green Cells | Red Signal | Actual Pct Red Cells | Normalized Pct Red Cells |
| <b>Mecarbinatate</b> |                                  |  | 0.1 uM           | 110.82       | 0.92                   | 130.87                     | 88.17      | 0.05                 | -47.38                   |
|                      |                                  |  | 1 uM             | 96.83        | 0.83                   | 35.13                      | 95.04      | 0.07                 | -26.76                   |
|                      |                                  |  | 10 uM            | 106.63       | 0.86                   | 87.50                      | 101.41     | 0.07                 | -22.63                   |

Compound

Normalized Values (A and B Sets)

Responses

| Compound                | Normalized Values (A and B Sets) |  | Average Response |              |                        |                            |            |                      |                          |
|-------------------------|----------------------------------|--|------------------|--------------|------------------------|----------------------------|------------|----------------------|--------------------------|
|                         |                                  |  | Dose             | Green Signal | Actual Pct Green Cells | Normalized Pct Green Cells | Red Signal | Actual Pct Red Cells | Normalized Pct Red Cells |
| <b>Medetomidine HCl</b> |                                  |  | 0.1 uM           | 108.69       | 0.93                   | 145.54                     | 80.20      | 0.05                 | -37.78                   |
|                         |                                  |  | 1 uM             | 82.54        | 0.66                   | -47.51                     | 79.29      | 0.04                 | -47.07                   |
|                         |                                  |  | 10 uM            | 96.64        | 0.83                   | 26.24                      | 85.58      | 0.04                 | -44.00                   |

Compound

Normalized Values (A and B Sets)

Responses

| Compound                           | Normalized Values (A and B Sets) |  | Average Response |              |                        |                            |            |                      |                          |
|------------------------------------|----------------------------------|--|------------------|--------------|------------------------|----------------------------|------------|----------------------|--------------------------|
|                                    |                                  |  | Dose             | Green Signal | Actual Pct Green Cells | Normalized Pct Green Cells | Red Signal | Actual Pct Red Cells | Normalized Pct Red Cells |
| <b>Medroxyprogesterone acetate</b> |                                  |  | 0.1 uM           | 91.86        | 0.85                   | 53.43                      | 84.02      | 0.05                 | -32.79                   |
|                                    |                                  |  | 1 uM             | 95.41        | 0.82                   | 64.80                      | 60.97      | 0.01                 | -51.06                   |
|                                    |                                  |  | 10 uM            | 93.73        | 0.89                   | 143.69                     | 74.01      | 0.02                 | -50.76                   |

Compound

Normalized Values (A and B Sets)

Responses

| Compound                              | Normalized Values (A and B Sets) |  | Average Response |              |                        |                            |            |                      |                          |
|---------------------------------------|----------------------------------|--|------------------|--------------|------------------------|----------------------------|------------|----------------------|--------------------------|
|                                       |                                  |  | Dose             | Green Signal | Actual Pct Green Cells | Normalized Pct Green Cells | Red Signal | Actual Pct Red Cells | Normalized Pct Red Cells |
| <b>MEK162 (ARRY-162, ARRY-438162)</b> |                                  |  | 0.1 uM           | 86.50        | 0.80                   | 17.57                      | 98.55      | 0.09                 | -21.56                   |
|                                       |                                  |  | 1 uM             | 86.69        | 0.79                   | 492.83                     | 83.58      | 0.09                 | 6.48                     |
|                                       |                                  |  | 10 uM            | 98.42        | 0.85                   | 45.03                      | 101.84     | 0.16                 | 20.18                    |

Compound

Normalized Values (A and B Sets)

Responses

| Compound                   | Normalized Values (A and B Sets) |  | Average Response |              |                        |                            |            |                      |                          |
|----------------------------|----------------------------------|--|------------------|--------------|------------------------|----------------------------|------------|----------------------|--------------------------|
|                            |                                  |  | Dose             | Green Signal | Actual Pct Green Cells | Normalized Pct Green Cells | Red Signal | Actual Pct Red Cells | Normalized Pct Red Cells |
| <b>Mepenzolate Bromide</b> |                                  |  | 0.1 uM           | 108.45       | 0.95                   | 184.59                     | 110.48     | 0.18                 | 27.01                    |
|                            |                                  |  | 1 uM             | 86.17        | 0.70                   | -23.25                     | 86.15      | 0.05                 | -41.17                   |
|                            |                                  |  | 10 uM            | 112.04       | 0.93                   | 145.89                     | 74.17      | 0.02                 | -55.07                   |

Compound

Normalized Values (A and B Sets)

Responses

| Mepiroxol | Percent Green Cells (AB) |  | Percent Red Cells (AB) |  | Average Response |              |                        |                            |            |                      |                          |
|-----------|--------------------------|--|------------------------|--|------------------|--------------|------------------------|----------------------------|------------|----------------------|--------------------------|
|           | Percent Response         |  | Percent Response       |  | Dose             | Green Signal | Actual Pct Green Cells | Normalized Pct Green Cells | Red Signal | Actual Pct Red Cells | Normalized Pct Red Cells |
|           | 100                      |  | 100                    |  | 0.1 uM           | 99.01        | 0.89                   | -36.98                     | 86.19      | 0.07                 | -26.85                   |
|           | 0                        |  | 0                      |  | 1 uM             | 88.59        | 0.75                   | 18.09                      | 82.14      | 0.05                 | -41.12                   |
|           | 0.1 uM                   |  | 0.1 uM                 |  | 10 uM            | 105.87       | 0.90                   | 136.32                     | 94.01      | 0.08                 | -21.22                   |

Compound

Normalized Values (A and B Sets)

Responses

| Meprednisone | Percent Green Cells (AB) |  | Percent Red Cells (AB) |  | Average Response |              |                        |                            |            |                      |                          |
|--------------|--------------------------|--|------------------------|--|------------------|--------------|------------------------|----------------------------|------------|----------------------|--------------------------|
|              | Percent Response         |  | Percent Response       |  | Dose             | Green Signal | Actual Pct Green Cells | Normalized Pct Green Cells | Red Signal | Actual Pct Red Cells | Normalized Pct Red Cells |
|              | 100                      |  | 100                    |  | 0.1 uM           | 92.94        | 0.82                   | 38.01                      | 115.01     | 0.24                 | 72.33                    |
|              | 0                        |  | 0                      |  | 1 uM             | 97.68        | 0.87                   | 211.00                     | 72.26      | 0.03                 | -33.13                   |
|              | 0.1 uM                   |  | 0.1 uM                 |  | 10 uM            | 91.86        | 0.85                   | 40.08                      | 66.27      | 0.02                 | -41.23                   |

Compound

Normalized Values (A and B Sets)

Responses

| Meropenem | Percent Green Cells (AB) |  | Percent Red Cells (AB) |  | Average Response |              |                        |                            |            |                      |                          |
|-----------|--------------------------|--|------------------------|--|------------------|--------------|------------------------|----------------------------|------------|----------------------|--------------------------|
|           | Percent Response         |  | Percent Response       |  | Dose             | Green Signal | Actual Pct Green Cells | Normalized Pct Green Cells | Red Signal | Actual Pct Red Cells | Normalized Pct Red Cells |
|           | 100                      |  | 100                    |  | 0.1 uM           | 102.29       | 0.91                   | 101.90                     | 86.16      | 0.05                 | -49.83                   |
|           | 0                        |  | 0                      |  | 1 uM             | 111.22       | 0.94                   | 159.33                     | 75.73      | 0.01                 | -50.94                   |
|           | 0.1 uM                   |  | 0.1 uM                 |  | 10 uM            | 103.09       | 0.88                   | 105.57                     | 95.97      | 0.03                 | -39.93                   |

Compound

Normalized Values (A and B Sets)

Responses

| Methazolamide | Percent Green Cells (AB) |  | Percent Red Cells (AB) |  | Average Response |              |                        |                            |            |                      |                          |
|---------------|--------------------------|--|------------------------|--|------------------|--------------|------------------------|----------------------------|------------|----------------------|--------------------------|
|               | Percent Response         |  | Percent Response       |  | Dose             | Green Signal | Actual Pct Green Cells | Normalized Pct Green Cells | Red Signal | Actual Pct Red Cells | Normalized Pct Red Cells |
|               | 100                      |  | 100                    |  | 0.1 uM           | 73.01        | 0.66                   | 252.26                     | 70.08      | 0.02                 | -53.73                   |
|               | 0                        |  | 0                      |  | 1 uM             | 95.16        | 0.80                   | 60.84                      | 85.56      | 0.07                 | -31.98                   |
|               | 0.1 uM                   |  | 0.1 uM                 |  | 10 uM            | 90.45        | 0.81                   | 23.19                      | 80.05      | 0.02                 | -51.48                   |

Compound

Normalized Values (A and B Sets)

Responses

| Methscopolamine | Percent Green Cells (AB) |  | Percent Red Cells (AB) |  | Average Response |              |                        |                            |            |                      |                          |
|-----------------|--------------------------|--|------------------------|--|------------------|--------------|------------------------|----------------------------|------------|----------------------|--------------------------|
|                 | Percent Response         |  | Percent Response       |  | Dose             | Green Signal | Actual Pct Green Cells | Normalized Pct Green Cells | Red Signal | Actual Pct Red Cells | Normalized Pct Red Cells |
|                 | 100                      |  | 100                    |  | 0.1 uM           | 100.43       | 0.91                   | 109.21                     | 104.32     | 0.11                 | -23.84                   |
|                 | 0                        |  | 0                      |  | 1 uM             | 106.29       | 0.91                   | 138.52                     | 88.60      | 0.04                 | -40.68                   |
|                 | 0.1 uM                   |  | 0.1 uM                 |  | 10 uM            | 101.50       | 0.86                   | 91.25                      | 109.05     | 0.08                 | -19.90                   |

Compound

Normalized Values (A and B Sets)

Responses

| Methyclothiazide | Percent Green Cells (AB) |  | Percent Red Cells (AB) |       | Average Response |              |                        |                            |            |                      |                          |
|------------------|--------------------------|--|------------------------|-------|------------------|--------------|------------------------|----------------------------|------------|----------------------|--------------------------|
|                  | Percent Response         |  | Percent Response       |       | Dose             | Green Signal | Actual Pct Green Cells | Normalized Pct Green Cells | Red Signal | Actual Pct Red Cells | Normalized Pct Red Cells |
|                  |                          |  |                        |       | 0.1 uM           | 84.93        | 0.77                   | 345.13                     | 61.10      | 0.01                 | -58.54                   |
|                  | concentration            |  | concentration          |       | 1 uM             | 94.45        | 0.82                   | 73.66                      | 77.24      | 0.03                 | -51.80                   |
|                  |                          |  |                        | 10 uM | 74.94            | 0.61         | 112.12                 | 77.91                      | 0.04       | -41.72               |                          |

Compound

Normalized Values (A and B Sets)

Responses

| Methyl-Hesperidin | Percent Green Cells (AB) |  | Percent Red Cells (AB) |       | Average Response |              |                        |                            |            |                      |                          |
|-------------------|--------------------------|--|------------------------|-------|------------------|--------------|------------------------|----------------------------|------------|----------------------|--------------------------|
|                   | Percent Response         |  | Percent Response       |       | Dose             | Green Signal | Actual Pct Green Cells | Normalized Pct Green Cells | Red Signal | Actual Pct Red Cells | Normalized Pct Red Cells |
|                   |                          |  |                        |       | 0.1 uM           | 87.56        | 0.82                   | 23.30                      | 49.65      | 0.01                 | -52.33                   |
|                   | concentration            |  | concentration          |       | 1 uM             | 93.87        | 0.86                   | 80.00                      | 84.04      | 0.04                 | -38.03                   |
|                   |                          |  |                        | 10 uM | 97.90            | 0.91         | 382.24                 | 82.01                      | 0.04       | -40.17               |                          |

Compound

Normalized Values (A and B Sets)

Responses

| Mezlocillin Sodium | Percent Green Cells (AB) |  | Percent Red Cells (AB) |       | Average Response |              |                        |                            |            |                      |                          |
|--------------------|--------------------------|--|------------------------|-------|------------------|--------------|------------------------|----------------------------|------------|----------------------|--------------------------|
|                    | Percent Response         |  | Percent Response       |       | Dose             | Green Signal | Actual Pct Green Cells | Normalized Pct Green Cells | Red Signal | Actual Pct Red Cells | Normalized Pct Red Cells |
|                    |                          |  |                        |       | 0.1 uM           | 91.19        | 0.83                   | 44.53                      | 77.28      | 0.02                 | -60.01                   |
|                    | concentration            |  | concentration          |       | 1 uM             | 96.66        | 0.86                   | -74.88                     | 71.85      | 0.03                 | -37.21                   |
|                    |                          |  |                        | 10 uM | 87.75            | 0.85         | 33.22                  | 59.56                      | 0.01       | -46.27               |                          |

Compound

Normalized Values (A and B Sets)

Responses

| MG 149 | Percent Green Cells (AB) |  | Percent Red Cells (AB) |       | Average Response |              |                        |                            |            |                      |                          |
|--------|--------------------------|--|------------------------|-------|------------------|--------------|------------------------|----------------------------|------------|----------------------|--------------------------|
|        | Percent Response         |  | Percent Response       |       | Dose             | Green Signal | Actual Pct Green Cells | Normalized Pct Green Cells | Red Signal | Actual Pct Red Cells | Normalized Pct Red Cells |
|        |                          |  |                        |       | 0.1 uM           | 91.51        | 0.84                   | 53.39                      | 98.12      | 0.10                 | -13.92                   |
|        | concentration            |  | concentration          |       | 1 uM             | 102.86       | 0.91                   | 169.55                     | 102.76     | 0.14                 | 26.30                    |
|        |                          |  |                        | 10 uM | 101.43           | 0.93         | 112.81                 | 83.33                      | 0.04       | -34.22               |                          |

Compound

Normalized Values (A and B Sets)

Responses

| MG-132 | Percent Green Cells (AB) |  | Percent Red Cells (AB) |       | Average Response |              |                        |                            |            |                      |                          |
|--------|--------------------------|--|------------------------|-------|------------------|--------------|------------------------|----------------------------|------------|----------------------|--------------------------|
|        | Percent Response         |  | Percent Response       |       | Dose             | Green Signal | Actual Pct Green Cells | Normalized Pct Green Cells | Red Signal | Actual Pct Red Cells | Normalized Pct Red Cells |
|        |                          |  |                        |       | 0.1 uM           | 99.21        | 0.87                   | 76.17                      | 123.60     | 0.24                 | 51.90                    |
|        | concentration            |  | concentration          |       | 1 uM             | 87.24        | 0.56                   | -89.44                     | 119.32     | 0.18                 | 26.48                    |
|        |                          |  |                        | 10 uM | 84.16            | 0.74         |                        | 97.22                      | 0.09       | -16.07               |                          |



Compound

Normalized Values (A and B Sets)

Responses

| Compound | Normalized Values (A and B Sets) |  | Responses |              |                        |                            |            |                      |                          |
|----------|----------------------------------|--|-----------|--------------|------------------------|----------------------------|------------|----------------------|--------------------------|
|          |                                  |  | Dose      | Green Signal | Actual Pct Green Cells | Normalized Pct Green Cells | Red Signal | Actual Pct Red Cells | Normalized Pct Red Cells |
|          |                                  |  | 0.1 uM    | 102.12       | 0.90                   | 110.53                     | 101.16     | 0.13                 | 4.59                     |
|          |                                  |  | 1 uM      | 110.64       | 0.92                   | 114.18                     | 98.96      | 0.13                 | 0.97                     |
|          |                                  |  | 10 uM     | 106.92       | 0.92                   | 188.80                     | 117.37     | 0.18                 | 28.59                    |

Compound

Normalized Values (A and B Sets)

Responses

| Compound             | Normalized Values (A and B Sets) |  | Average Response |              |                        |                            |            |                      |                          |
|----------------------|----------------------------------|--|------------------|--------------|------------------------|----------------------------|------------|----------------------|--------------------------|
|                      |                                  |  | Dose             | Green Signal | Actual Pct Green Cells | Normalized Pct Green Cells | Red Signal | Actual Pct Red Cells | Normalized Pct Red Cells |
| MK-801 (Dizocilpine) |                                  |  | 0.1 uM           | 94.29        | 0.87                   | 81.90                      | 81.70      | 0.03                 | -57.49                   |
|                      |                                  |  | 1 uM             | 88.35        | 0.83                   | 366.70                     | 66.34      | 0.01                 | -42.54                   |
|                      |                                  |  | 10 uM            | 110.58       | 0.95                   | 130.64                     | 92.56      | 0.20                 | 34.46                    |

Compound

Normalized Values (A and B Sets)

Responses

| Compound | Normalized Values (A and B Sets) |  | Average Response |              |                        |                            |            |                      |                          |
|----------|----------------------------------|--|------------------|--------------|------------------------|----------------------------|------------|----------------------|--------------------------|
|          |                                  |  | Dose             | Green Signal | Actual Pct Green Cells | Normalized Pct Green Cells | Red Signal | Actual Pct Red Cells | Normalized Pct Red Cells |
| MK-1775  |                                  |  | 0.1 uM           | 92.11        | 0.82                   | 19.14                      | 77.65      | 0.02                 | -62.58                   |
|          |                                  |  | 1 uM             | 115.02       | 0.87                   | 90.79                      | 84.82      | 0.07                 | -26.23                   |
|          |                                  |  | 10 uM            | 68.49        | 0.45                   | 173.73                     | 80.34      | 0.06                 | -27.79                   |

Compound

Normalized Values (A and B Sets)

Responses

| Compound | Normalized Values (A and B Sets) |  | Average Response |              |                        |                            |            |                      |                          |
|----------|----------------------------------|--|------------------|--------------|------------------------|----------------------------|------------|----------------------|--------------------------|
|          |                                  |  | Dose             | Green Signal | Actual Pct Green Cells | Normalized Pct Green Cells | Red Signal | Actual Pct Red Cells | Normalized Pct Red Cells |
| MK-2048  |                                  |  | 0.1 uM           | 95.13        | 0.84                   | 43.93                      | 80.42      | 0.06                 | -29.05                   |
|          |                                  |  | 1 uM             | 106.18       | 0.89                   | 97.52                      | 96.36      | 0.09                 | -16.89                   |
|          |                                  |  | 10 uM            | 104.67       | 0.95                   | 381.03                     | 93.92      | 0.07                 | -26.69                   |

Compound

Normalized Values (A and B Sets)

Responses

| Compound | Normalized Values (A and B Sets) |  | Average Response |              |                        |                            |            |                      |                          |
|----------|----------------------------------|--|------------------|--------------|------------------------|----------------------------|------------|----------------------|--------------------------|
|          |                                  |  | Dose             | Green Signal | Actual Pct Green Cells | Normalized Pct Green Cells | Red Signal | Actual Pct Red Cells | Normalized Pct Red Cells |
| MK-2461  |                                  |  | 0.1 uM           | 94.29        | 0.87                   | 80.72                      | 104.92     | 0.16                 | 14.41                    |
|          |                                  |  | 1 uM             | 101.40       | 0.83                   | 74.12                      | 89.49      | 0.09                 | -13.73                   |
|          |                                  |  | 10 uM            | 99.90        | 0.92                   | 65.08                      | 83.06      | 0.04                 | -41.64                   |



| Compound                 | Normalized Values (A and B Sets) | Responses                                                                                                                                                                                                                                                                                                                                                                                                                                                                                                                                                                                                                                                                        |                  |                        |                            |            |                      |                          |  |      |              |                        |                            |            |                      |                          |        |       |      |        |       |      |        |      |       |      |      |       |      |        |       |        |      |        |        |      |       |
|--------------------------|----------------------------------|----------------------------------------------------------------------------------------------------------------------------------------------------------------------------------------------------------------------------------------------------------------------------------------------------------------------------------------------------------------------------------------------------------------------------------------------------------------------------------------------------------------------------------------------------------------------------------------------------------------------------------------------------------------------------------|------------------|------------------------|----------------------------|------------|----------------------|--------------------------|--|------|--------------|------------------------|----------------------------|------------|----------------------|--------------------------|--------|-------|------|--------|-------|------|--------|------|-------|------|------|-------|------|--------|-------|--------|------|--------|--------|------|-------|
| <b>MK-2866 (GTx-024)</b> |                                  | <table border="1"> <thead> <tr> <th colspan="7">Average Response</th> </tr> <tr> <th>Dose</th> <th>Green Signal</th> <th>Actual Pct Green Cells</th> <th>Normalized Pct Green Cells</th> <th>Red Signal</th> <th>Actual Pct Red Cells</th> <th>Normalized Pct Red Cells</th> </tr> </thead> <tbody> <tr> <td>0.1 uM</td> <td>96.56</td> <td>0.82</td> <td>-12.78</td> <td>89.64</td> <td>0.05</td> <td>-46.97</td> </tr> <tr> <td>1 uM</td> <td>93.45</td> <td>0.80</td> <td>8.65</td> <td>83.79</td> <td>0.03</td> <td>-42.46</td> </tr> <tr> <td>10 uM</td> <td>103.18</td> <td>0.88</td> <td>103.56</td> <td>134.79</td> <td>0.18</td> <td>28.35</td> </tr> </tbody> </table> | Average Response |                        |                            |            |                      |                          |  | Dose | Green Signal | Actual Pct Green Cells | Normalized Pct Green Cells | Red Signal | Actual Pct Red Cells | Normalized Pct Red Cells | 0.1 uM | 96.56 | 0.82 | -12.78 | 89.64 | 0.05 | -46.97 | 1 uM | 93.45 | 0.80 | 8.65 | 83.79 | 0.03 | -42.46 | 10 uM | 103.18 | 0.88 | 103.56 | 134.79 | 0.18 | 28.35 |
|                          |                                  | Average Response                                                                                                                                                                                                                                                                                                                                                                                                                                                                                                                                                                                                                                                                 |                  |                        |                            |            |                      |                          |  |      |              |                        |                            |            |                      |                          |        |       |      |        |       |      |        |      |       |      |      |       |      |        |       |        |      |        |        |      |       |
|                          |                                  | Dose                                                                                                                                                                                                                                                                                                                                                                                                                                                                                                                                                                                                                                                                             | Green Signal     | Actual Pct Green Cells | Normalized Pct Green Cells | Red Signal | Actual Pct Red Cells | Normalized Pct Red Cells |  |      |              |                        |                            |            |                      |                          |        |       |      |        |       |      |        |      |       |      |      |       |      |        |       |        |      |        |        |      |       |
|                          |                                  | 0.1 uM                                                                                                                                                                                                                                                                                                                                                                                                                                                                                                                                                                                                                                                                           | 96.56            | 0.82                   | -12.78                     | 89.64      | 0.05                 | -46.97                   |  |      |              |                        |                            |            |                      |                          |        |       |      |        |       |      |        |      |       |      |      |       |      |        |       |        |      |        |        |      |       |
| 1 uM                     | 93.45                            | 0.80                                                                                                                                                                                                                                                                                                                                                                                                                                                                                                                                                                                                                                                                             | 8.65             | 83.79                  | 0.03                       | -42.46     |                      |                          |  |      |              |                        |                            |            |                      |                          |        |       |      |        |       |      |        |      |       |      |      |       |      |        |       |        |      |        |        |      |       |
| 10 uM                    | 103.18                           | 0.88                                                                                                                                                                                                                                                                                                                                                                                                                                                                                                                                                                                                                                                                             | 103.56           | 134.79                 | 0.18                       | 28.35      |                      |                          |  |      |              |                        |                            |            |                      |                          |        |       |      |        |       |      |        |      |       |      |      |       |      |        |       |        |      |        |        |      |       |

| Compound           | Normalized Values (A and B Sets) | Responses                                                                                                                                                                                                                                                                                                                                                                                                                                                                                                                                                                                                                                                                         |                  |                        |                            |            |                      |                          |  |      |              |                        |                            |            |                      |                          |        |       |      |       |       |      |        |      |        |      |        |       |      |        |       |        |      |       |        |      |       |
|--------------------|----------------------------------|-----------------------------------------------------------------------------------------------------------------------------------------------------------------------------------------------------------------------------------------------------------------------------------------------------------------------------------------------------------------------------------------------------------------------------------------------------------------------------------------------------------------------------------------------------------------------------------------------------------------------------------------------------------------------------------|------------------|------------------------|----------------------------|------------|----------------------|--------------------------|--|------|--------------|------------------------|----------------------------|------------|----------------------|--------------------------|--------|-------|------|-------|-------|------|--------|------|--------|------|--------|-------|------|--------|-------|--------|------|-------|--------|------|-------|
| <b>MK-3207 HCl</b> |                                  | <table border="1"> <thead> <tr> <th colspan="7">Average Response</th> </tr> <tr> <th>Dose</th> <th>Green Signal</th> <th>Actual Pct Green Cells</th> <th>Normalized Pct Green Cells</th> <th>Red Signal</th> <th>Actual Pct Red Cells</th> <th>Normalized Pct Red Cells</th> </tr> </thead> <tbody> <tr> <td>0.1 uM</td> <td>95.79</td> <td>0.85</td> <td>62.16</td> <td>76.58</td> <td>0.02</td> <td>-61.07</td> </tr> <tr> <td>1 uM</td> <td>101.84</td> <td>0.80</td> <td>-32.04</td> <td>89.67</td> <td>0.07</td> <td>-24.10</td> </tr> <tr> <td>10 uM</td> <td>103.72</td> <td>0.85</td> <td>80.04</td> <td>132.17</td> <td>0.18</td> <td>22.00</td> </tr> </tbody> </table> | Average Response |                        |                            |            |                      |                          |  | Dose | Green Signal | Actual Pct Green Cells | Normalized Pct Green Cells | Red Signal | Actual Pct Red Cells | Normalized Pct Red Cells | 0.1 uM | 95.79 | 0.85 | 62.16 | 76.58 | 0.02 | -61.07 | 1 uM | 101.84 | 0.80 | -32.04 | 89.67 | 0.07 | -24.10 | 10 uM | 103.72 | 0.85 | 80.04 | 132.17 | 0.18 | 22.00 |
|                    |                                  | Average Response                                                                                                                                                                                                                                                                                                                                                                                                                                                                                                                                                                                                                                                                  |                  |                        |                            |            |                      |                          |  |      |              |                        |                            |            |                      |                          |        |       |      |       |       |      |        |      |        |      |        |       |      |        |       |        |      |       |        |      |       |
|                    |                                  | Dose                                                                                                                                                                                                                                                                                                                                                                                                                                                                                                                                                                                                                                                                              | Green Signal     | Actual Pct Green Cells | Normalized Pct Green Cells | Red Signal | Actual Pct Red Cells | Normalized Pct Red Cells |  |      |              |                        |                            |            |                      |                          |        |       |      |       |       |      |        |      |        |      |        |       |      |        |       |        |      |       |        |      |       |
|                    |                                  | 0.1 uM                                                                                                                                                                                                                                                                                                                                                                                                                                                                                                                                                                                                                                                                            | 95.79            | 0.85                   | 62.16                      | 76.58      | 0.02                 | -61.07                   |  |      |              |                        |                            |            |                      |                          |        |       |      |       |       |      |        |      |        |      |        |       |      |        |       |        |      |       |        |      |       |
| 1 uM               | 101.84                           | 0.80                                                                                                                                                                                                                                                                                                                                                                                                                                                                                                                                                                                                                                                                              | -32.04           | 89.67                  | 0.07                       | -24.10     |                      |                          |  |      |              |                        |                            |            |                      |                          |        |       |      |       |       |      |        |      |        |      |        |       |      |        |       |        |      |       |        |      |       |
| 10 uM              | 103.72                           | 0.85                                                                                                                                                                                                                                                                                                                                                                                                                                                                                                                                                                                                                                                                              | 80.04            | 132.17                 | 0.18                       | 22.00      |                      |                          |  |      |              |                        |                            |            |                      |                          |        |       |      |       |       |      |        |      |        |      |        |       |      |        |       |        |      |       |        |      |       |

| Compound                | Normalized Values (A and B Sets) | Responses                                                                                                                                                                                                                                                                                                                                                                                                                                                                                                                                                                                                                                                                       |                  |                        |                            |            |                      |                          |  |      |              |                        |                            |            |                      |                          |        |       |      |      |       |      |        |      |       |      |       |       |      |        |       |        |      |        |       |      |        |
|-------------------------|----------------------------------|---------------------------------------------------------------------------------------------------------------------------------------------------------------------------------------------------------------------------------------------------------------------------------------------------------------------------------------------------------------------------------------------------------------------------------------------------------------------------------------------------------------------------------------------------------------------------------------------------------------------------------------------------------------------------------|------------------|------------------------|----------------------------|------------|----------------------|--------------------------|--|------|--------------|------------------------|----------------------------|------------|----------------------|--------------------------|--------|-------|------|------|-------|------|--------|------|-------|------|-------|-------|------|--------|-------|--------|------|--------|-------|------|--------|
| <b>MK-5108 (VX-689)</b> |                                  | <table border="1"> <thead> <tr> <th colspan="7">Average Response</th> </tr> <tr> <th>Dose</th> <th>Green Signal</th> <th>Actual Pct Green Cells</th> <th>Normalized Pct Green Cells</th> <th>Red Signal</th> <th>Actual Pct Red Cells</th> <th>Normalized Pct Red Cells</th> </tr> </thead> <tbody> <tr> <td>0.1 uM</td> <td>87.21</td> <td>0.79</td> <td>1.07</td> <td>96.82</td> <td>0.09</td> <td>-10.81</td> </tr> <tr> <td>1 uM</td> <td>90.47</td> <td>0.72</td> <td>23.63</td> <td>95.24</td> <td>0.09</td> <td>-15.03</td> </tr> <tr> <td>10 uM</td> <td>103.56</td> <td>0.87</td> <td>333.39</td> <td>88.14</td> <td>0.07</td> <td>-25.02</td> </tr> </tbody> </table> | Average Response |                        |                            |            |                      |                          |  | Dose | Green Signal | Actual Pct Green Cells | Normalized Pct Green Cells | Red Signal | Actual Pct Red Cells | Normalized Pct Red Cells | 0.1 uM | 87.21 | 0.79 | 1.07 | 96.82 | 0.09 | -10.81 | 1 uM | 90.47 | 0.72 | 23.63 | 95.24 | 0.09 | -15.03 | 10 uM | 103.56 | 0.87 | 333.39 | 88.14 | 0.07 | -25.02 |
|                         |                                  | Average Response                                                                                                                                                                                                                                                                                                                                                                                                                                                                                                                                                                                                                                                                |                  |                        |                            |            |                      |                          |  |      |              |                        |                            |            |                      |                          |        |       |      |      |       |      |        |      |       |      |       |       |      |        |       |        |      |        |       |      |        |
|                         |                                  | Dose                                                                                                                                                                                                                                                                                                                                                                                                                                                                                                                                                                                                                                                                            | Green Signal     | Actual Pct Green Cells | Normalized Pct Green Cells | Red Signal | Actual Pct Red Cells | Normalized Pct Red Cells |  |      |              |                        |                            |            |                      |                          |        |       |      |      |       |      |        |      |       |      |       |       |      |        |       |        |      |        |       |      |        |
|                         |                                  | 0.1 uM                                                                                                                                                                                                                                                                                                                                                                                                                                                                                                                                                                                                                                                                          | 87.21            | 0.79                   | 1.07                       | 96.82      | 0.09                 | -10.81                   |  |      |              |                        |                            |            |                      |                          |        |       |      |      |       |      |        |      |       |      |       |       |      |        |       |        |      |        |       |      |        |
| 1 uM                    | 90.47                            | 0.72                                                                                                                                                                                                                                                                                                                                                                                                                                                                                                                                                                                                                                                                            | 23.63            | 95.24                  | 0.09                       | -15.03     |                      |                          |  |      |              |                        |                            |            |                      |                          |        |       |      |      |       |      |        |      |       |      |       |       |      |        |       |        |      |        |       |      |        |
| 10 uM                   | 103.56                           | 0.87                                                                                                                                                                                                                                                                                                                                                                                                                                                                                                                                                                                                                                                                            | 333.39           | 88.14                  | 0.07                       | -25.02     |                      |                          |  |      |              |                        |                            |            |                      |                          |        |       |      |      |       |      |        |      |       |      |       |       |      |        |       |        |      |        |       |      |        |

| Compound       | Normalized Values (A and B Sets) | Responses                                                                                                                                                                                                                                                                                                                                                                                                                                                                                                                                                                                                                                                                        |                  |                        |                            |            |                      |                          |  |      |              |                        |                            |            |                      |                          |        |        |      |        |       |      |        |      |       |      |       |       |      |        |       |       |      |       |       |      |        |
|----------------|----------------------------------|----------------------------------------------------------------------------------------------------------------------------------------------------------------------------------------------------------------------------------------------------------------------------------------------------------------------------------------------------------------------------------------------------------------------------------------------------------------------------------------------------------------------------------------------------------------------------------------------------------------------------------------------------------------------------------|------------------|------------------------|----------------------------|------------|----------------------|--------------------------|--|------|--------------|------------------------|----------------------------|------------|----------------------|--------------------------|--------|--------|------|--------|-------|------|--------|------|-------|------|-------|-------|------|--------|-------|-------|------|-------|-------|------|--------|
| <b>MK-8245</b> |                                  | <table border="1"> <thead> <tr> <th colspan="7">Average Response</th> </tr> <tr> <th>Dose</th> <th>Green Signal</th> <th>Actual Pct Green Cells</th> <th>Normalized Pct Green Cells</th> <th>Red Signal</th> <th>Actual Pct Red Cells</th> <th>Normalized Pct Red Cells</th> </tr> </thead> <tbody> <tr> <td>0.1 uM</td> <td>103.50</td> <td>0.90</td> <td>113.58</td> <td>82.18</td> <td>0.02</td> <td>-61.21</td> </tr> <tr> <td>1 uM</td> <td>95.10</td> <td>0.84</td> <td>62.86</td> <td>93.47</td> <td>0.04</td> <td>-39.12</td> </tr> <tr> <td>10 uM</td> <td>97.05</td> <td>0.81</td> <td>51.12</td> <td>85.22</td> <td>0.03</td> <td>-42.15</td> </tr> </tbody> </table> | Average Response |                        |                            |            |                      |                          |  | Dose | Green Signal | Actual Pct Green Cells | Normalized Pct Green Cells | Red Signal | Actual Pct Red Cells | Normalized Pct Red Cells | 0.1 uM | 103.50 | 0.90 | 113.58 | 82.18 | 0.02 | -61.21 | 1 uM | 95.10 | 0.84 | 62.86 | 93.47 | 0.04 | -39.12 | 10 uM | 97.05 | 0.81 | 51.12 | 85.22 | 0.03 | -42.15 |
|                |                                  | Average Response                                                                                                                                                                                                                                                                                                                                                                                                                                                                                                                                                                                                                                                                 |                  |                        |                            |            |                      |                          |  |      |              |                        |                            |            |                      |                          |        |        |      |        |       |      |        |      |       |      |       |       |      |        |       |       |      |       |       |      |        |
|                |                                  | Dose                                                                                                                                                                                                                                                                                                                                                                                                                                                                                                                                                                                                                                                                             | Green Signal     | Actual Pct Green Cells | Normalized Pct Green Cells | Red Signal | Actual Pct Red Cells | Normalized Pct Red Cells |  |      |              |                        |                            |            |                      |                          |        |        |      |        |       |      |        |      |       |      |       |       |      |        |       |       |      |       |       |      |        |
|                |                                  | 0.1 uM                                                                                                                                                                                                                                                                                                                                                                                                                                                                                                                                                                                                                                                                           | 103.50           | 0.90                   | 113.58                     | 82.18      | 0.02                 | -61.21                   |  |      |              |                        |                            |            |                      |                          |        |        |      |        |       |      |        |      |       |      |       |       |      |        |       |       |      |       |       |      |        |
| 1 uM           | 95.10                            | 0.84                                                                                                                                                                                                                                                                                                                                                                                                                                                                                                                                                                                                                                                                             | 62.86            | 93.47                  | 0.04                       | -39.12     |                      |                          |  |      |              |                        |                            |            |                      |                          |        |        |      |        |       |      |        |      |       |      |       |       |      |        |       |       |      |       |       |      |        |
| 10 uM          | 97.05                            | 0.81                                                                                                                                                                                                                                                                                                                                                                                                                                                                                                                                                                                                                                                                             | 51.12            | 85.22                  | 0.03                       | -42.15     |                      |                          |  |      |              |                        |                            |            |                      |                          |        |        |      |        |       |      |        |      |       |      |       |       |      |        |       |       |      |       |       |      |        |

| Compound                    | Normalized Values (A and B Sets) | Responses                                                                                                                                                                                                                                                                                                                                                                                                                                                                                                                                                                                                                                                                         |                  |                        |                            |            |                      |                          |  |      |              |                        |                            |            |                      |                          |        |       |      |        |       |      |        |      |       |      |       |       |      |        |       |        |      |        |        |      |       |
|-----------------------------|----------------------------------|-----------------------------------------------------------------------------------------------------------------------------------------------------------------------------------------------------------------------------------------------------------------------------------------------------------------------------------------------------------------------------------------------------------------------------------------------------------------------------------------------------------------------------------------------------------------------------------------------------------------------------------------------------------------------------------|------------------|------------------------|----------------------------|------------|----------------------|--------------------------|--|------|--------------|------------------------|----------------------------|------------|----------------------|--------------------------|--------|-------|------|--------|-------|------|--------|------|-------|------|-------|-------|------|--------|-------|--------|------|--------|--------|------|-------|
| <b>MK-8776 (SCH 900776)</b> |                                  | <table border="1"> <thead> <tr> <th colspan="7">Average Response</th> </tr> <tr> <th>Dose</th> <th>Green Signal</th> <th>Actual Pct Green Cells</th> <th>Normalized Pct Green Cells</th> <th>Red Signal</th> <th>Actual Pct Red Cells</th> <th>Normalized Pct Red Cells</th> </tr> </thead> <tbody> <tr> <td>0.1 uM</td> <td>99.92</td> <td>0.91</td> <td>117.78</td> <td>90.17</td> <td>0.07</td> <td>-19.28</td> </tr> <tr> <td>1 uM</td> <td>98.25</td> <td>0.82</td> <td>63.94</td> <td>83.98</td> <td>0.05</td> <td>-31.43</td> </tr> <tr> <td>10 uM</td> <td>113.70</td> <td>0.92</td> <td>312.10</td> <td>112.19</td> <td>0.18</td> <td>25.12</td> </tr> </tbody> </table> | Average Response |                        |                            |            |                      |                          |  | Dose | Green Signal | Actual Pct Green Cells | Normalized Pct Green Cells | Red Signal | Actual Pct Red Cells | Normalized Pct Red Cells | 0.1 uM | 99.92 | 0.91 | 117.78 | 90.17 | 0.07 | -19.28 | 1 uM | 98.25 | 0.82 | 63.94 | 83.98 | 0.05 | -31.43 | 10 uM | 113.70 | 0.92 | 312.10 | 112.19 | 0.18 | 25.12 |
|                             |                                  | Average Response                                                                                                                                                                                                                                                                                                                                                                                                                                                                                                                                                                                                                                                                  |                  |                        |                            |            |                      |                          |  |      |              |                        |                            |            |                      |                          |        |       |      |        |       |      |        |      |       |      |       |       |      |        |       |        |      |        |        |      |       |
|                             |                                  | Dose                                                                                                                                                                                                                                                                                                                                                                                                                                                                                                                                                                                                                                                                              | Green Signal     | Actual Pct Green Cells | Normalized Pct Green Cells | Red Signal | Actual Pct Red Cells | Normalized Pct Red Cells |  |      |              |                        |                            |            |                      |                          |        |       |      |        |       |      |        |      |       |      |       |       |      |        |       |        |      |        |        |      |       |
|                             |                                  | 0.1 uM                                                                                                                                                                                                                                                                                                                                                                                                                                                                                                                                                                                                                                                                            | 99.92            | 0.91                   | 117.78                     | 90.17      | 0.07                 | -19.28                   |  |      |              |                        |                            |            |                      |                          |        |       |      |        |       |      |        |      |       |      |       |       |      |        |       |        |      |        |        |      |       |
| 1 uM                        | 98.25                            | 0.82                                                                                                                                                                                                                                                                                                                                                                                                                                                                                                                                                                                                                                                                              | 63.94            | 83.98                  | 0.05                       | -31.43     |                      |                          |  |      |              |                        |                            |            |                      |                          |        |       |      |        |       |      |        |      |       |      |       |       |      |        |       |        |      |        |        |      |       |
| 10 uM                       | 113.70                           | 0.92                                                                                                                                                                                                                                                                                                                                                                                                                                                                                                                                                                                                                                                                              | 312.10           | 112.19                 | 0.18                       | 25.12      |                      |                          |  |      |              |                        |                            |            |                      |                          |        |       |      |        |       |      |        |      |       |      |       |       |      |        |       |        |      |        |        |      |       |

Compound

Normalized Values (A and B Sets)

Responses

| ML 141 | Percent Green Cells (AB) |  | Percent Red Cells (AB) |  | Average Response |              |                        |                            |            |                      |                          |
|--------|--------------------------|--|------------------------|--|------------------|--------------|------------------------|----------------------------|------------|----------------------|--------------------------|
|        | Percent Response         |  | Percent Response       |  | Dose             | Green Signal | Actual Pct Green Cells | Normalized Pct Green Cells | Red Signal | Actual Pct Red Cells | Normalized Pct Red Cells |
|        | 100                      |  | 100                    |  | 0.1 uM           | 95.22        | 0.86                   | 78.61                      | 61.40      | 0.02                 | -62.25                   |
|        | 0                        |  | 0                      |  | 1 uM             | 89.93        | 0.84                   | 64.14                      | 73.38      | 0.03                 | -31.33                   |
|        | 0.1 uM                   |  | 0.1 uM                 |  | 10 uM            | 81.28        | 0.76                   | -36.19                     | 57.15      | 0.01                 | -47.42                   |
|        | concentration            |  | concentration          |  |                  |              |                        |                            |            |                      |                          |

Compound

Normalized Values (A and B Sets)

Responses

| ML130 (Nodinitib-1) | Percent Green Cells (AB) |  | Percent Red Cells (AB) |  | Average Response |              |                        |                            |            |                      |                          |
|---------------------|--------------------------|--|------------------------|--|------------------|--------------|------------------------|----------------------------|------------|----------------------|--------------------------|
|                     | Percent Response         |  | Percent Response       |  | Dose             | Green Signal | Actual Pct Green Cells | Normalized Pct Green Cells | Red Signal | Actual Pct Red Cells | Normalized Pct Red Cells |
|                     | 100                      |  | 100                    |  | 0.1 uM           | 95.07        | 0.92                   | 181.73                     | 66.79      | 0.01                 | -57.98                   |
|                     | 0                        |  | 0                      |  | 1 uM             | 86.56        | 0.78                   | 39.09                      | 63.64      | 0.01                 | -62.64                   |
|                     | 0.1 uM                   |  | 0.1 uM                 |  | 10 uM            | 99.21        | 0.88                   | 129.63                     | 90.44      | 0.06                 | -33.98                   |
|                     | concentration            |  | concentration          |  |                  |              |                        |                            |            |                      |                          |

Compound

Normalized Values (A and B Sets)

Responses

| ML133 HCl | Percent Green Cells (AB) |  | Percent Red Cells (AB) |  | Average Response |              |                        |                            |            |                      |                          |
|-----------|--------------------------|--|------------------------|--|------------------|--------------|------------------------|----------------------------|------------|----------------------|--------------------------|
|           | Percent Response         |  | Percent Response       |  | Dose             | Green Signal | Actual Pct Green Cells | Normalized Pct Green Cells | Red Signal | Actual Pct Red Cells | Normalized Pct Red Cells |
|           | 100                      |  | 100                    |  | 0.1 uM           | 80.33        | 0.65                   | 127.75                     | 91.24      | 0.08                 | -15.24                   |
|           | 0                        |  | 0                      |  | 1 uM             | 95.38        | 0.81                   | 55.18                      | 79.32      | 0.04                 | -37.42                   |
|           | 0.1 uM                   |  | 0.1 uM                 |  | 10 uM            | 93.72        | 0.87                   | 40.22                      | 79.57      | 0.03                 | -43.85                   |
|           | concentration            |  | concentration          |  |                  |              |                        |                            |            |                      |                          |

Compound

Normalized Values (A and B Sets)

Responses

| ML161 | Percent Green Cells (AB) |  | Percent Red Cells (AB) |  | Average Response |              |                        |                            |            |                      |                          |
|-------|--------------------------|--|------------------------|--|------------------|--------------|------------------------|----------------------------|------------|----------------------|--------------------------|
|       | Percent Response         |  | Percent Response       |  | Dose             | Green Signal | Actual Pct Green Cells | Normalized Pct Green Cells | Red Signal | Actual Pct Red Cells | Normalized Pct Red Cells |
|       | 100                      |  | 100                    |  | 0.1 uM           | 88.50        | 0.79                   | 366.09                     | 69.46      | 0.02                 | -52.54                   |
|       | 0                        |  | 0                      |  | 1 uM             | 82.56        | 0.70                   | -11.31                     | 76.40      | 0.02                 | -55.94                   |
|       | 0.1 uM                   |  | 0.1 uM                 |  | 10 uM            | 83.05        | 0.73                   | -14.86                     | 94.34      | 0.09                 | -15.39                   |
|       | concentration            |  | concentration          |  |                  |              |                        |                            |            |                      |                          |

Compound

Normalized Values (A and B Sets)

Responses

| MLN0905 | Percent Green Cells (AB) |  | Percent Red Cells (AB) |  | Average Response |              |                        |                            |            |                      |                          |
|---------|--------------------------|--|------------------------|--|------------------|--------------|------------------------|----------------------------|------------|----------------------|--------------------------|
|         | Percent Response         |  | Percent Response       |  | Dose             | Green Signal | Actual Pct Green Cells | Normalized Pct Green Cells | Red Signal | Actual Pct Red Cells | Normalized Pct Red Cells |
|         | 100                      |  | 100                    |  | 0.1 uM           | 76.22        | 0.66                   | 917.66                     | 87.66      | 0.07                 | -27.78                   |
|         | 0                        |  | 0                      |  | 1 uM             | 108.58       | 0.87                   | 104.99                     | 124.84     | 0.28                 | 74.83                    |
|         | 0.1 uM                   |  | 0.1 uM                 |  | 10 uM            |              |                        |                            |            |                      |                          |
|         | concentration            |  | concentration          |  |                  |              |                        |                            |            |                      |                          |



Compound

Normalized Values (A and B Sets)

Responses

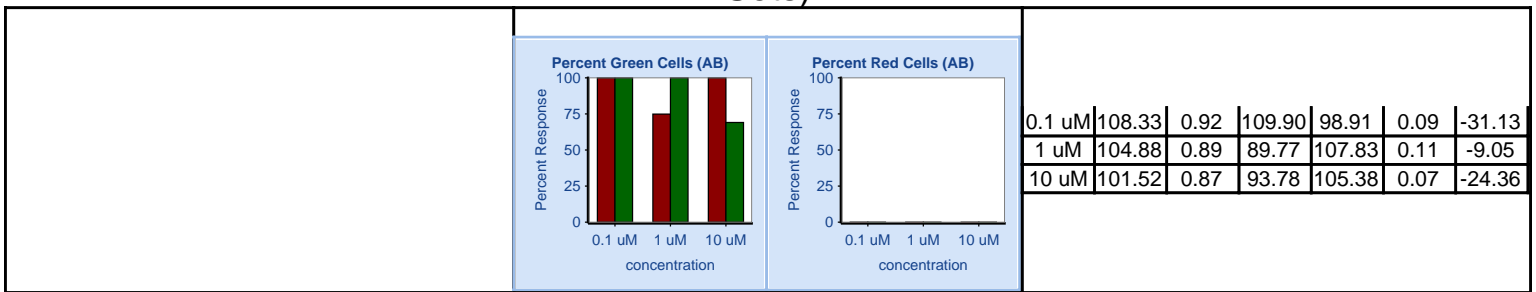

Compound

Normalized Values (A and B Sets)

Responses

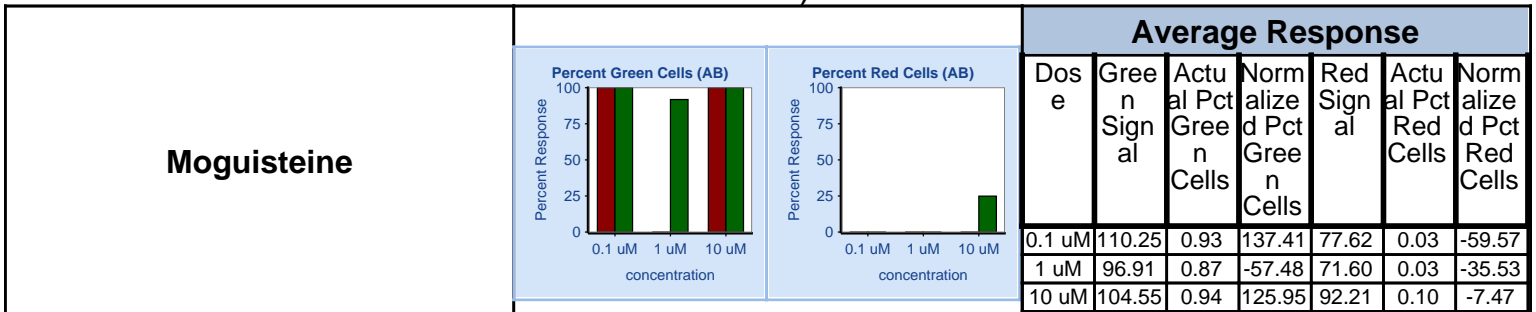

Compound

Normalized Values (A and B Sets)

Responses

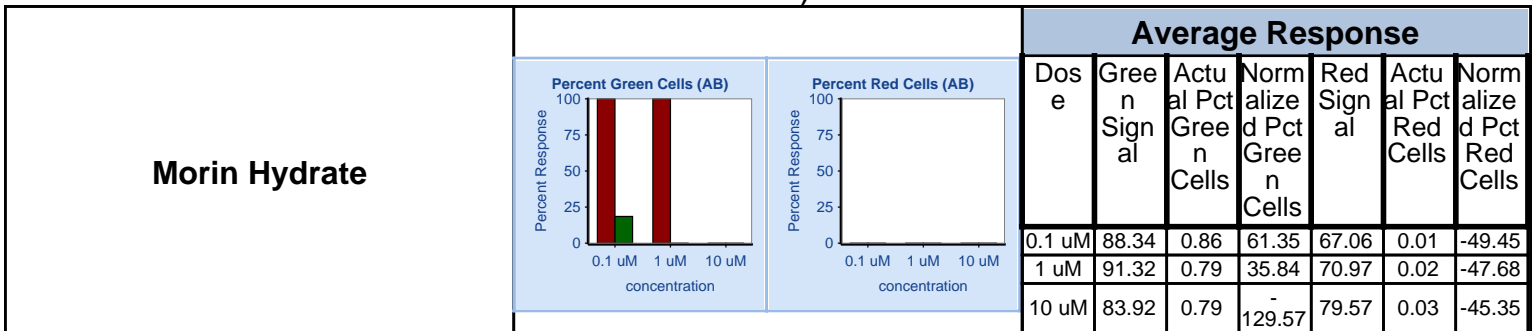

Compound

Normalized Values (A and B Sets)

Responses

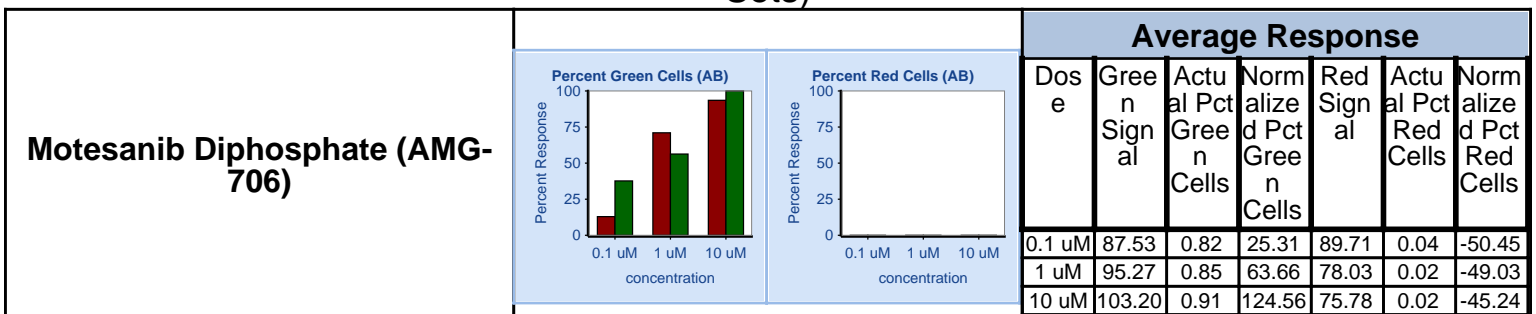

Compound

Normalized Values (A and B Sets)

Responses

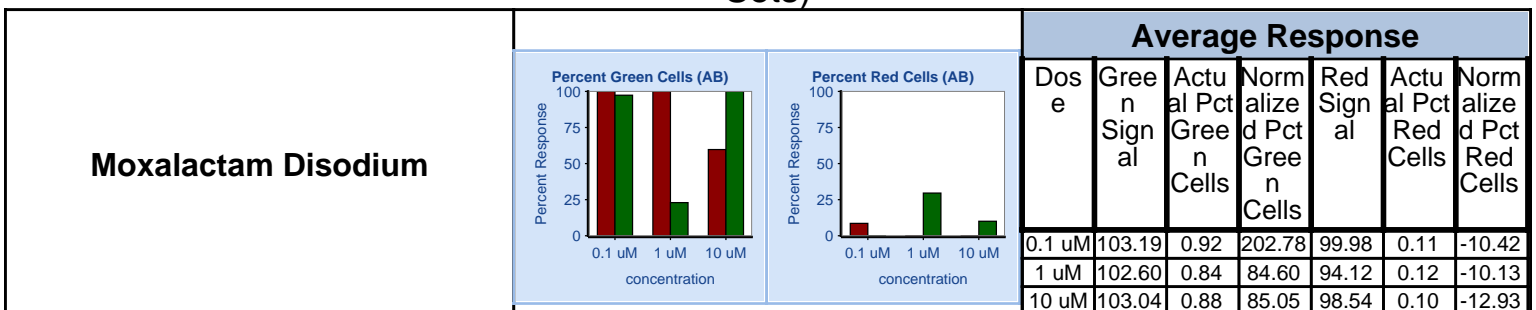

Compound

Normalized Values (A and B Sets)

Responses

| Mozavaptan | Percent Green Cells (AB) |  | Percent Red Cells (AB)  |  | Average Response |              |                        |                            |            |                      |                          |
|------------|--------------------------|--|-------------------------|--|------------------|--------------|------------------------|----------------------------|------------|----------------------|--------------------------|
|            | 100<br>Percent Response  |  | 100<br>Percent Response |  | Dose             | Green Signal | Actual Pct Green Cells | Normalized Pct Green Cells | Red Signal | Actual Pct Red Cells | Normalized Pct Red Cells |
|            | 0.1 uM 1 uM 10 uM        |  | 0.1 uM 1 uM 10 uM       |  | 0.1 uM           | 91.04        | 0.87                   | -75.11                     | 75.84      | 0.01                 | -56.78                   |
|            | concentration            |  | concentration           |  | 1 uM             | 92.59        | 0.78                   | 45.34                      | 67.76      | 0.01                 | -62.13                   |
|            |                          |  |                         |  | 10 uM            | 105.73       | 0.86                   | 135.79                     | 102.54     | 0.12                 | 0.98                     |

Compound

Normalized Values (A and B Sets)

Responses

| MPEP | Percent Green Cells (AB) |  | Percent Red Cells (AB)  |  | Average Response |              |                        |                            |            |                      |                          |
|------|--------------------------|--|-------------------------|--|------------------|--------------|------------------------|----------------------------|------------|----------------------|--------------------------|
|      | 100<br>Percent Response  |  | 100<br>Percent Response |  | Dose             | Green Signal | Actual Pct Green Cells | Normalized Pct Green Cells | Red Signal | Actual Pct Red Cells | Normalized Pct Red Cells |
|      | 0.1 uM 1 uM 10 uM        |  | 0.1 uM 1 uM 10 uM       |  | 0.1 uM           | 108.88       | 0.94                   | 142.32                     | 103.97     | 0.14                 | 10.67                    |
|      | concentration            |  | concentration           |  | 1 uM             | 107.36       | 0.89                   | 100.07                     | 86.88      | 0.05                 | -34.03                   |
|      |                          |  |                         |  | 10 uM            | 106.03       | 0.95                   | 326.19                     | 85.98      | 0.04                 | -37.81                   |

Compound

Normalized Values (A and B Sets)

Responses

| MRS 2578 | Percent Green Cells (AB) |  | Percent Red Cells (AB)  |  | Average Response |              |                        |                            |            |                      |                          |
|----------|--------------------------|--|-------------------------|--|------------------|--------------|------------------------|----------------------------|------------|----------------------|--------------------------|
|          | 100<br>Percent Response  |  | 100<br>Percent Response |  | Dose             | Green Signal | Actual Pct Green Cells | Normalized Pct Green Cells | Red Signal | Actual Pct Red Cells | Normalized Pct Red Cells |
|          | 0.1 uM 1 uM 10 uM        |  | 0.1 uM 1 uM 10 uM       |  | 0.1 uM           | 94.11        | 0.83                   | 46.15                      | 75.17      | 0.02                 | -62.72                   |
|          | concentration            |  | concentration           |  | 1 uM             | 84.31        | 0.77                   | 164.95                     | 62.21      | 0.02                 | -36.23                   |
|          |                          |  |                         |  | 10 uM            | 108.45       | 0.94                   | 121.82                     | 70.31      | 0.03                 | -39.42                   |

Compound

Normalized Values (A and B Sets)

Responses

| MRT-10 | Percent Green Cells (AB) |  | Percent Red Cells (AB)  |  | Average Response |              |                        |                            |            |                      |                          |
|--------|--------------------------|--|-------------------------|--|------------------|--------------|------------------------|----------------------------|------------|----------------------|--------------------------|
|        | 100<br>Percent Response  |  | 100<br>Percent Response |  | Dose             | Green Signal | Actual Pct Green Cells | Normalized Pct Green Cells | Red Signal | Actual Pct Red Cells | Normalized Pct Red Cells |
|        | 0.1 uM 1 uM 10 uM        |  | 0.1 uM 1 uM 10 uM       |  | 0.1 uM           | 88.68        | 0.80                   | 23.42                      | 74.20      | 0.02                 | -63.96                   |
|        | concentration            |  | concentration           |  | 1 uM             | 107.27       | 0.94                   | 246.85                     | 69.47      | 0.03                 | -33.86                   |
|        |                          |  |                         |  | 10 uM            | 91.47        | 0.90                   | 89.70                      | 62.99      | 0.01                 | -46.33                   |

Compound

Normalized Values (A and B Sets)

Responses

| Mubritinib (TAK 165) | Percent Green Cells (AB) |  | Percent Red Cells (AB)  |  | Average Response |              |                        |                            |            |                      |                          |
|----------------------|--------------------------|--|-------------------------|--|------------------|--------------|------------------------|----------------------------|------------|----------------------|--------------------------|
|                      | 100<br>Percent Response  |  | 100<br>Percent Response |  | Dose             | Green Signal | Actual Pct Green Cells | Normalized Pct Green Cells | Red Signal | Actual Pct Red Cells | Normalized Pct Red Cells |
|                      | 0.1 uM 1 uM 10 uM        |  | 0.1 uM 1 uM 10 uM       |  | 0.1 uM           | 85.92        | 0.78                   | -16.51                     | 69.15      | 0.03                 | -42.57                   |
|                      | concentration            |  | concentration           |  | 1 uM             | 96.26        | 0.83                   | 61.91                      | 73.05      | 0.02                 | -46.97                   |
|                      |                          |  |                         |  | 10 uM            | 91.17        | 0.80                   | 675.81                     | 82.21      | 0.04                 | -41.31                   |

Compound

Normalized Values (A and B Sets)

Responses

| <b>Mycophenolate Mofetil</b> |        | Average Response |              |                        |                            |            |                      |                          |
|------------------------------|--------|------------------|--------------|------------------------|----------------------------|------------|----------------------|--------------------------|
|                              |        | Dose             | Green Signal | Actual Pct Green Cells | Normalized Pct Green Cells | Red Signal | Actual Pct Red Cells | Normalized Pct Red Cells |
|                              |        | 0.1 uM           | 84.29        | 0.72                   | -34.69                     | 76.77      | 0.03                 | -60.31                   |
|                              |        | 1 uM             | 89.68        | 0.74                   | 16.15                      | 76.52      | 0.02                 | -50.41                   |
| 10 uM                        | 116.00 | 0.89             | 104.14       | 121.94                 | 0.13                       | 3.81       |                      |                          |

Compound

Normalized Values (A and B Sets)

Responses

| <b>Myricetin</b> |        | Average Response |              |                        |                            |            |                      |                          |
|------------------|--------|------------------|--------------|------------------------|----------------------------|------------|----------------------|--------------------------|
|                  |        | Dose             | Green Signal | Actual Pct Green Cells | Normalized Pct Green Cells | Red Signal | Actual Pct Red Cells | Normalized Pct Red Cells |
|                  |        | 0.1 uM           | 82.57        | 0.75                   | -38.86                     | 68.68      | 0.02                 | -44.89                   |
|                  |        | 1 uM             | 84.19        | 0.70                   | -0.28                      | 75.29      | 0.03                 | -42.57                   |
| 10 uM            | 103.80 | 0.94             | 439.15       | 83.82                  | 0.03                       | -42.50     |                      |                          |

Compound

Normalized Values (A and B Sets)

Responses

| <b>Myricitrin</b> |       | Average Response |              |                        |                            |            |                      |                          |
|-------------------|-------|------------------|--------------|------------------------|----------------------------|------------|----------------------|--------------------------|
|                   |       | Dose             | Green Signal | Actual Pct Green Cells | Normalized Pct Green Cells | Red Signal | Actual Pct Red Cells | Normalized Pct Red Cells |
|                   |       | 0.1 uM           | 104.01       | 0.94                   | 144.66                     | 67.74      | 0.03                 | -42.90                   |
|                   |       | 1 uM             | 103.78       | 0.91                   | 104.03                     | 77.42      | 0.03                 | -44.28                   |
| 10 uM             | 91.02 | 0.88             | -1.48        | 75.11                  | 0.03                       | -44.71     |                      |                          |

Compound

Normalized Values (A and B Sets)

Responses

| <b>n/a</b> |       | Average Response |              |                        |                            |            |                      |                          |
|------------|-------|------------------|--------------|------------------------|----------------------------|------------|----------------------|--------------------------|
|            |       | Dose             | Green Signal | Actual Pct Green Cells | Normalized Pct Green Cells | Red Signal | Actual Pct Red Cells | Normalized Pct Red Cells |
|            |       | 0.1 uM           | 108.00       | 0.86                   | 81.49                      | 139.96     | 0.26                 | 60.46                    |
|            |       | 1 uM             | 86.45        | 0.64                   | -38.42                     | 127.71     | 0.20                 | 34.00                    |
| 10 uM      | 92.16 | 0.80             | 46.26        | 119.73                 | 0.13                       | 2.02       |                      |                          |

Compound

Normalized Values (A and B Sets)

Responses

| <b>Nafamostat Mesylate</b> |        | Average Response |              |                        |                            |            |                      |                          |
|----------------------------|--------|------------------|--------------|------------------------|----------------------------|------------|----------------------|--------------------------|
|                            |        | Dose             | Green Signal | Actual Pct Green Cells | Normalized Pct Green Cells | Red Signal | Actual Pct Red Cells | Normalized Pct Red Cells |
|                            |        | 0.1 uM           | 102.26       | 0.91                   | 96.77                      | 86.15      | 0.03                 | -57.57                   |
|                            |        | 1 uM             | 102.51       | 0.88                   | 101.36                     | 78.14      | 0.02                 | -48.95                   |
| 10 uM                      | 103.19 | 0.88             | 97.00        | 102.11                 | 0.06                       | -27.83     |                      |                          |

Compound

Normalized Values (A and B Sets)

Responses

| Nafcillin Sodium | Percent Green Cells (AB) |  | Percent Red Cells (AB) |       | Average Response |              |                        |                            |            |                      |                          |
|------------------|--------------------------|--|------------------------|-------|------------------|--------------|------------------------|----------------------------|------------|----------------------|--------------------------|
|                  | Percent Response         |  | Percent Response       |       | Dose             | Green Signal | Actual Pct Green Cells | Normalized Pct Green Cells | Red Signal | Actual Pct Red Cells | Normalized Pct Red Cells |
|                  |                          |  |                        |       | 0.1 uM           | 80.40        | 0.76                   | 288.28                     | 80.22      | 0.04                 | -42.97                   |
|                  | concentration            |  | concentration          |       | 1 uM             | 70.69        | 0.51                   | 157.91                     | 74.68      | 0.04                 | -48.87                   |
|                  |                          |  |                        | 10 uM | 79.38            | 0.66         | 115.81                 | 78.44                      | 0.03       | -49.59               |                          |

Compound

Normalized Values (A and B Sets)

Responses

| Naltrexone HCl | Percent Green Cells (AB) |  | Percent Red Cells (AB) |       | Average Response |              |                        |                            |            |                      |                          |
|----------------|--------------------------|--|------------------------|-------|------------------|--------------|------------------------|----------------------------|------------|----------------------|--------------------------|
|                | Percent Response         |  | Percent Response       |       | Dose             | Green Signal | Actual Pct Green Cells | Normalized Pct Green Cells | Red Signal | Actual Pct Red Cells | Normalized Pct Red Cells |
|                |                          |  |                        |       | 0.1 uM           | 92.62        | 0.84                   | 44.14                      | 94.83      | 0.06                 | -40.67                   |
|                | concentration            |  | concentration          |       | 1 uM             | 109.90       | 0.88                   | 98.16                      | 102.02     | 0.09                 | -17.96                   |
|                |                          |  |                        | 10 uM | 114.33           | 0.91         | 114.07                 | 111.20                     | 0.10       | -13.89               |                          |

Compound

Normalized Values (A and B Sets)

Responses

| Nanchangmycin | Percent Green Cells (AB) |  | Percent Red Cells (AB) |       | Average Response |              |                        |                            |            |                      |                          |
|---------------|--------------------------|--|------------------------|-------|------------------|--------------|------------------------|----------------------------|------------|----------------------|--------------------------|
|               | Percent Response         |  | Percent Response       |       | Dose             | Green Signal | Actual Pct Green Cells | Normalized Pct Green Cells | Red Signal | Actual Pct Red Cells | Normalized Pct Red Cells |
|               |                          |  |                        |       | 0.1 uM           | 106.83       | 0.88                   | 104.31                     | 108.59     | 0.14                 | 3.00                     |
|               | concentration            |  | concentration          |       | 1 uM             | 119.35       | 0.90                   | 112.39                     | 120.77     | 0.17                 | 18.69                    |
|               |                          |  |                        | 10 uM | 84.36            | 0.65         | -40.70                 | 77.79                      | 0.04       | -36.18               |                          |

Compound

Normalized Values (A and B Sets)

Responses

| Naratriptan | Percent Green Cells (AB) |  | Percent Red Cells (AB) |       | Average Response |              |                        |                            |            |                      |                          |
|-------------|--------------------------|--|------------------------|-------|------------------|--------------|------------------------|----------------------------|------------|----------------------|--------------------------|
|             | Percent Response         |  | Percent Response       |       | Dose             | Green Signal | Actual Pct Green Cells | Normalized Pct Green Cells | Red Signal | Actual Pct Red Cells | Normalized Pct Red Cells |
|             |                          |  |                        |       | 0.1 uM           | 101.26       | 0.86                   | 27.10                      | 90.67      | 0.07                 | -30.65                   |
|             | concentration            |  | concentration          |       | 1 uM             | 105.17       | 0.85                   | 85.59                      | 86.99      | 0.06                 | -31.64                   |
|             |                          |  |                        | 10 uM | 106.15           | 0.88         | 101.37                 | 112.33                     | 0.10       | -11.47               |                          |

Compound

Normalized Values (A and B Sets)

Responses

| Naringin | Percent Green Cells (AB) |  | Percent Red Cells (AB) |  | Average Response |              |                        |                            |            |                      |                          |
|----------|--------------------------|--|------------------------|--|------------------|--------------|------------------------|----------------------------|------------|----------------------|--------------------------|
|          | Percent Response         |  | Percent Response       |  | Dose             | Green Signal | Actual Pct Green Cells | Normalized Pct Green Cells | Red Signal | Actual Pct Red Cells | Normalized Pct Red Cells |
|          |                          |  |                        |  | 0.1 uM           | 74.86        | 0.63                   | 156.86                     | 85.96      | 0.07                 | -22.65                   |
|          | concentration            |  | concentration          |  |                  |              |                        |                            |            |                      |                          |





Compound

Normalized Values (A and B Sets)

Responses

| Compound | Normalized Values (A and B Sets) |      | Average Response |              |                        |                            |            |                      |                          |
|----------|----------------------------------|------|------------------|--------------|------------------------|----------------------------|------------|----------------------|--------------------------|
|          |                                  |      | Dose             | Green Signal | Actual Pct Green Cells | Normalized Pct Green Cells | Red Signal | Actual Pct Red Cells | Normalized Pct Red Cells |
|          |                                  |      | 0.1 uM           | 98.81        | 0.86                   | 74.65                      | 103.19     | 0.10                 | -19.67                   |
|          |                                  |      | 1 uM             | 94.68        | 0.76                   | -7.37                      | 114.53     | 0.14                 | 5.74                     |
| 10 uM    | 105.71                           | 0.86 | 87.92            | 128.67       | 0.17                   | 19.83                      |            |                      |                          |

Compound

Normalized Values (A and B Sets)

Responses

| Compound | Normalized Values (A and B Sets) |      | Average Response |              |                        |                            |            |                      |                          |
|----------|----------------------------------|------|------------------|--------------|------------------------|----------------------------|------------|----------------------|--------------------------|
|          |                                  |      | Dose             | Green Signal | Actual Pct Green Cells | Normalized Pct Green Cells | Red Signal | Actual Pct Red Cells | Normalized Pct Red Cells |
|          |                                  |      | 0.1 uM           | 93.85        | 0.86                   | 73.16                      | 84.62      | 0.03                 | -55.44                   |
|          |                                  |      | 1 uM             | 92.28        | 0.86                   | -47.65                     | 79.83      | 0.04                 | -31.57                   |
| 10 uM    | 89.98                            | 0.86 | 41.65            | 70.42        | 0.03                   | -38.52                     |            |                      |                          |

Compound

Normalized Values (A and B Sets)

Responses

| Compound | Normalized Values (A and B Sets) |      | Average Response |              |                        |                            |            |                      |                          |
|----------|----------------------------------|------|------------------|--------------|------------------------|----------------------------|------------|----------------------|--------------------------|
|          |                                  |      | Dose             | Green Signal | Actual Pct Green Cells | Normalized Pct Green Cells | Red Signal | Actual Pct Red Cells | Normalized Pct Red Cells |
|          |                                  |      | 0.1 uM           | 97.25        | 0.91                   | 116.07                     | 78.64      | 0.03                 | -41.28                   |
|          |                                  |      | 1 uM             | 84.43        | 0.73                   | 14.83                      | 88.44      | 0.05                 | -35.76                   |
| 10 uM    | 91.85                            | 0.87 | -54.12           | 82.16        | 0.04                   | -38.93                     |            |                      |                          |

Compound

Normalized Values (A and B Sets)

Responses

| Compound | Normalized Values (A and B Sets) |      | Average Response |              |                        |                            |            |                      |                          |
|----------|----------------------------------|------|------------------|--------------|------------------------|----------------------------|------------|----------------------|--------------------------|
|          |                                  |      | Dose             | Green Signal | Actual Pct Green Cells | Normalized Pct Green Cells | Red Signal | Actual Pct Red Cells | Normalized Pct Red Cells |
|          |                                  |      | 0.1 uM           | 82.00        | 0.76                   | -39.41                     | 83.99      | 0.04                 | -37.83                   |
|          |                                  |      | 1 uM             | 94.15        | 0.84                   | 73.19                      | 67.18      | 0.01                 | -51.15                   |
| 10 uM    | 95.26                            | 0.91 | 319.49           | 104.92       | 0.11                   | -8.37                      |            |                      |                          |

Compound

Normalized Values (A and B Sets)

Responses

| Compound | Normalized Values (A and B Sets) |      | Average Response |              |                        |                            |            |                      |                          |
|----------|----------------------------------|------|------------------|--------------|------------------------|----------------------------|------------|----------------------|--------------------------|
|          |                                  |      | Dose             | Green Signal | Actual Pct Green Cells | Normalized Pct Green Cells | Red Signal | Actual Pct Red Cells | Normalized Pct Red Cells |
|          |                                  |      | 0.1 uM           | 92.96        | 0.84                   | 61.21                      | 104.83     | 0.09                 | -30.50                   |
|          |                                  |      | 1 uM             | 93.52        | 0.82                   | 70.62                      | 81.44      | 0.02                 | -46.51                   |
| 10 uM    | 94.67                            | 0.83 | 65.84            | 98.61        | 0.06                   | -27.23                     |            |                      |                          |

Compound

Normalized Values (A and B Sets)

Responses

| Nepicastat (SYN-117) HCl | Percent Green Cells (AB) |  | Percent Red Cells (AB)  |  | Average Response |              |                        |                            |            |                      |                          |
|--------------------------|--------------------------|--|-------------------------|--|------------------|--------------|------------------------|----------------------------|------------|----------------------|--------------------------|
|                          | 100<br>Percent Response  |  | 100<br>Percent Response |  | Dose             | Green Signal | Actual Pct Green Cells | Normalized Pct Green Cells | Red Signal | Actual Pct Red Cells | Normalized Pct Red Cells |
|                          | 0.1 uM 1 uM 10 uM        |  | 0.1 uM 1 uM 10 uM       |  | 0.1 uM           | 103.75       | 0.91                   | 115.88                     | 106.73     | 0.15                 | 18.43                    |
|                          | concentration            |  | concentration           |  | 1 uM             | 94.97        | 0.80                   | 49.83                      | 90.59      | 0.08                 | -19.36                   |
|                          |                          |  |                         |  | 10 uM            | 104.83       | 0.95                   | 381.96                     | 95.84      | 0.07                 | -27.26                   |

Compound

Normalized Values (A and B Sets)

Responses

| Neratinib (HKI-272) | Percent Green Cells (AB) |  | Percent Red Cells (AB)  |  | Average Response |              |                        |                            |            |                      |                          |
|---------------------|--------------------------|--|-------------------------|--|------------------|--------------|------------------------|----------------------------|------------|----------------------|--------------------------|
|                     | 100<br>Percent Response  |  | 100<br>Percent Response |  | Dose             | Green Signal | Actual Pct Green Cells | Normalized Pct Green Cells | Red Signal | Actual Pct Red Cells | Normalized Pct Red Cells |
|                     | 0.1 uM 1 uM 10 uM        |  | 0.1 uM 1 uM 10 uM       |  | 0.1 uM           | 91.87        | 0.85                   | 55.12                      | 72.90      | 0.02                 | -46.56                   |
|                     | concentration            |  | concentration           |  | 1 uM             | 82.37        | 0.72                   | 7.53                       | 77.50      | 0.02                 | -47.15                   |
|                     |                          |  |                         |  | 10 uM            | 96.29        | 0.93                   | 403.46                     | 84.42      | 0.03                 | -45.35                   |

Compound

Normalized Values (A and B Sets)

Responses

| Nexturastat A | Percent Green Cells (AB) |  | Percent Red Cells (AB)  |  | Average Response |              |                        |                            |            |                      |                          |
|---------------|--------------------------|--|-------------------------|--|------------------|--------------|------------------------|----------------------------|------------|----------------------|--------------------------|
|               | 100<br>Percent Response  |  | 100<br>Percent Response |  | Dose             | Green Signal | Actual Pct Green Cells | Normalized Pct Green Cells | Red Signal | Actual Pct Red Cells | Normalized Pct Red Cells |
|               | 0.1 uM 1 uM 10 uM        |  | 0.1 uM 1 uM 10 uM       |  | 0.1 uM           | 96.55        | 0.86                   | 73.07                      | 108.03     | 0.14                 | 11.40                    |
|               | concentration            |  | concentration           |  | 1 uM             | 98.19        | 0.85                   | 212.80                     | 86.52      | 0.07                 | -14.48                   |
|               |                          |  |                         |  | 10 uM            | 107.10       | 0.93                   | 110.62                     | 107.77     | 0.15                 | 16.34                    |

Compound

Normalized Values (A and B Sets)

Responses

| NFkB Activation Inhibitor III | Percent Green Cells (AB) |  | Percent Red Cells (AB)  |  | Average Response |              |                        |                            |            |                      |                          |
|-------------------------------|--------------------------|--|-------------------------|--|------------------|--------------|------------------------|----------------------------|------------|----------------------|--------------------------|
|                               | 100<br>Percent Response  |  | 100<br>Percent Response |  | Dose             | Green Signal | Actual Pct Green Cells | Normalized Pct Green Cells | Red Signal | Actual Pct Red Cells | Normalized Pct Red Cells |
|                               | 0.1 uM 1 uM 10 uM        |  | 0.1 uM 1 uM 10 uM       |  | 0.1 uM           | 99.73        | 0.90                   | 106.88                     | 88.91      | 0.05                 | -43.11                   |
|                               | concentration            |  | concentration           |  | 1 uM             | 96.26        | 0.90                   | 10.05                      | 74.92      | 0.03                 | -34.38                   |
|                               |                          |  |                         |  | 10 uM            | 83.93        | 0.76                   | -45.44                     | 57.10      | 0.01                 | -45.37                   |

Compound

Normalized Values (A and B Sets)

Responses

| Nicaraven | Percent Green Cells (AB) |  | Percent Red Cells (AB)  |  | Average Response |              |                        |                            |            |                      |                          |
|-----------|--------------------------|--|-------------------------|--|------------------|--------------|------------------------|----------------------------|------------|----------------------|--------------------------|
|           | 100<br>Percent Response  |  | 100<br>Percent Response |  | Dose             | Green Signal | Actual Pct Green Cells | Normalized Pct Green Cells | Red Signal | Actual Pct Red Cells | Normalized Pct Red Cells |
|           | 0.1 uM 1 uM 10 uM        |  | 0.1 uM 1 uM 10 uM       |  | 0.1 uM           | 94.56        | 0.89                   | 187.68                     | 94.25      | 0.10                 | -15.24                   |
|           | concentration            |  | concentration           |  | 1 uM             | 90.59        | 0.66                   | -55.24                     | 104.85     | 0.13                 | -0.20                    |
|           |                          |  |                         |  | 10 uM            | 93.32        | 0.79                   | 82.01                      | 95.85      | 0.08                 | -18.98                   |

Compound

Normalized Values (A and B Sets)

Responses

| Nicotine Ditartrate | Percent Green Cells (AB) |  | Percent Red Cells (AB)  |  | Average Response |              |                        |                            |            |                      |                          |
|---------------------|--------------------------|--|-------------------------|--|------------------|--------------|------------------------|----------------------------|------------|----------------------|--------------------------|
|                     | 100<br>Percent Response  |  | 100<br>Percent Response |  | Dose             | Green Signal | Actual Pct Green Cells | Normalized Pct Green Cells | Red Signal | Actual Pct Red Cells | Normalized Pct Red Cells |
|                     | 0.1 uM 1 uM 10 uM        |  | 0.1 uM 1 uM 10 uM       |  | 0.1 uM           | 83.56        | 0.79                   | -82.29                     | 86.56      | 0.06                 | -31.31                   |
|                     | concentration            |  | concentration           |  | 1 uM             | 96.30        | 0.78                   | 47.92                      | 88.84      | 0.07                 | -32.09                   |
|                     |                          |  |                         |  | 10 uM            | 112.38       | 0.92                   | 143.61                     | 104.25     | 0.14                 | 11.25                    |

Compound

Normalized Values (A and B Sets)

Responses

| Nintedanib (BIBF 1120) | Percent Green Cells (AB) |  | Percent Red Cells (AB)  |  | Average Response |              |                        |                            |            |                      |                          |
|------------------------|--------------------------|--|-------------------------|--|------------------|--------------|------------------------|----------------------------|------------|----------------------|--------------------------|
|                        | 100<br>Percent Response  |  | 100<br>Percent Response |  | Dose             | Green Signal | Actual Pct Green Cells | Normalized Pct Green Cells | Red Signal | Actual Pct Red Cells | Normalized Pct Red Cells |
|                        | 0.1 uM 1 uM 10 uM        |  | 0.1 uM 1 uM 10 uM       |  | 0.1 uM           | 95.42        | 0.89                   | 97.10                      | 94.66      | 0.07                 | -32.02                   |
|                        | concentration            |  | concentration           |  | 1 uM             | 94.90        | 0.84                   | -24.47                     | 98.63      | 0.16                 | 8.24                     |
|                        |                          |  |                         |  | 10 uM            | 80.63        | 0.75                   | -53.01                     | 87.15      | 0.09                 | -9.59                    |

Compound

Normalized Values (A and B Sets)

Responses

| Nitarsona | Percent Green Cells (AB) |  | Percent Red Cells (AB)  |  | Average Response                                                                               |              |                        |                            |            |                      |                          |
|-----------|--------------------------|--|-------------------------|--|------------------------------------------------------------------------------------------------|--------------|------------------------|----------------------------|------------|----------------------|--------------------------|
|           | 100<br>Percent Response  |  | 100<br>Percent Response |  | Dose                                                                                           | Green Signal | Actual Pct Green Cells | Normalized Pct Green Cells | Red Signal | Actual Pct Red Cells | Normalized Pct Red Cells |
|           | 0.1 uM 1 uM 10 uM        |  | 0.1 uM 1 uM 10 uM       |  | 0.1 uM                                                                                         | 90.29        | 0.82                   | -32.02                     | 71.87      | 0.04                 | -44.69                   |
|           | concentration            |  | concentration           |  | 1 uM                                                                                           | 99.39        | 0.82                   | 70.07                      | 88.72      | 0.08                 | -26.34                   |
|           |                          |  |                         |  | 10 uM <td>94.56</td> <td>0.81</td> <td>52.60</td> <td>78.20</td> <td>0.02</td> <td>-52.73</td> | 94.56        | 0.81                   | 52.60                      | 78.20      | 0.02                 | -52.73                   |

Compound

Normalized Values (A and B Sets)

Responses

| NLG919 | Percent Green Cells (AB) |  | Percent Red Cells (AB)  |  | Average Response                                                                               |              |                        |                            |            |                      |                          |
|--------|--------------------------|--|-------------------------|--|------------------------------------------------------------------------------------------------|--------------|------------------------|----------------------------|------------|----------------------|--------------------------|
|        | 100<br>Percent Response  |  | 100<br>Percent Response |  | Dose                                                                                           | Green Signal | Actual Pct Green Cells | Normalized Pct Green Cells | Red Signal | Actual Pct Red Cells | Normalized Pct Red Cells |
|        | 0.1 uM 1 uM 10 uM        |  | 0.1 uM 1 uM 10 uM       |  | 0.1 uM                                                                                         | 94.07        | 0.84                   | 120.48                     | 81.80      | 0.04                 | -41.86                   |
|        | concentration            |  | concentration           |  | 1 uM                                                                                           | 97.01        | 0.78                   | 41.95                      | 97.66      | 0.10                 | -14.57                   |
|        |                          |  |                         |  | 10 uM <td>90.24</td> <td>0.79</td> <td>14.11</td> <td>88.48</td> <td>0.08</td> <td>-24.28</td> | 90.24        | 0.79                   | 14.11                      | 88.48      | 0.08                 | -24.28                   |

Compound

Normalized Values (A and B Sets)

Responses

| Nocodazole | Percent Green Cells (AB) |  | Percent Red Cells (AB)  |  | Average Response                                                                               |              |                        |                            |            |                      |                          |
|------------|--------------------------|--|-------------------------|--|------------------------------------------------------------------------------------------------|--------------|------------------------|----------------------------|------------|----------------------|--------------------------|
|            | 100<br>Percent Response  |  | 100<br>Percent Response |  | Dose                                                                                           | Green Signal | Actual Pct Green Cells | Normalized Pct Green Cells | Red Signal | Actual Pct Red Cells | Normalized Pct Red Cells |
|            | 0.1 uM 1 uM 10 uM        |  | 0.1 uM 1 uM 10 uM       |  | 0.1 uM                                                                                         | 107.50       | 0.93                   | 141.78                     | 122.72     | 0.22                 | 46.90                    |
|            | concentration            |  | concentration           |  | 1 uM                                                                                           | 119.00       | 0.93                   | 119.48                     | 92.44      | 0.08                 | -19.20                   |
|            |                          |  |                         |  | 10 uM <td>96.97</td> <td>0.75</td> <td>853.41</td> <td>96.13</td> <td>0.15</td> <td>13.53</td> | 96.97        | 0.75                   | 853.41                     | 96.13      | 0.15                 | 13.53                    |

Compound

Normalized Values (A and B Sets)

Responses

| Nomifensine Maleate | Percent Green Cells (AB) |  | Percent Red Cells (AB) |  | Average Response |              |                        |                            |            |                      |                          |
|---------------------|--------------------------|--|------------------------|--|------------------|--------------|------------------------|----------------------------|------------|----------------------|--------------------------|
|                     | Percent Response         |  | Percent Response       |  | Dose             | Green Signal | Actual Pct Green Cells | Normalized Pct Green Cells | Red Signal | Actual Pct Red Cells | Normalized Pct Red Cells |
|                     | 100                      |  | 100                    |  | 0.1 uM           | 100.40       | 0.90                   | 108.16                     | 77.34      | 0.04                 | -42.73                   |
|                     | 0                        |  | 0                      |  | 1 uM             | 93.70        | 0.76                   | 28.19                      | 89.01      | 0.10                 | -20.01                   |
|                     | 0.1 uM                   |  | 0.1 uM                 |  | 10 uM            | 91.27        | 0.78                   | 18.87                      | 79.98      | 0.04                 | -44.11                   |

Compound

Normalized Values (A and B Sets)

Responses

| Noradrenaline bitartrate monohydrate | Percent Green Cells (AB) |  | Percent Red Cells (AB) |  | Average Response |              |                        |                            |            |                      |                          |
|--------------------------------------|--------------------------|--|------------------------|--|------------------|--------------|------------------------|----------------------------|------------|----------------------|--------------------------|
|                                      | Percent Response         |  | Percent Response       |  | Dose             | Green Signal | Actual Pct Green Cells | Normalized Pct Green Cells | Red Signal | Actual Pct Red Cells | Normalized Pct Red Cells |
|                                      | 100                      |  | 100                    |  | 0.1 uM           | 98.72        | 0.90                   | 108.73                     | 82.51      | 0.05                 | -32.00                   |
|                                      | 0                        |  | 0                      |  | 1 uM             | 97.38        | 0.85                   | 75.70                      | 85.80      | 0.05                 | -34.36                   |
|                                      | 0.1 uM                   |  | 0.1 uM                 |  | 10 uM            | 97.16        | 0.85                   | 137.31                     | 101.67     | 0.12                 | -1.75                    |

Compound

Normalized Values (A and B Sets)

Responses

| Noscapine HCl | Percent Green Cells (AB) |  | Percent Red Cells (AB) |  | Average Response |              |                        |                            |            |                      |                          |
|---------------|--------------------------|--|------------------------|--|------------------|--------------|------------------------|----------------------------|------------|----------------------|--------------------------|
|               | Percent Response         |  | Percent Response       |  | Dose             | Green Signal | Actual Pct Green Cells | Normalized Pct Green Cells | Red Signal | Actual Pct Red Cells | Normalized Pct Red Cells |
|               | 100                      |  | 100                    |  | 0.1 uM           | 99.00        | 0.89                   | 114.89                     | 100.22     | 0.12                 | -2.80                    |
|               | 0                        |  | 0                      |  | 1 uM             | 106.79       | 0.90                   | 127.25                     | 90.94      | 0.07                 | -31.38                   |
|               | 0.1 uM                   |  | 0.1 uM                 |  | 10 uM            | 94.62        | 0.78                   | -13.07                     | 113.63     | 0.16                 | 21.42                    |

Compound

Normalized Values (A and B Sets)

Responses

| NPS-2143 | Percent Green Cells (AB) |  | Percent Red Cells (AB) |  | Average Response |              |                        |                            |            |                      |                          |
|----------|--------------------------|--|------------------------|--|------------------|--------------|------------------------|----------------------------|------------|----------------------|--------------------------|
|          | Percent Response         |  | Percent Response       |  | Dose             | Green Signal | Actual Pct Green Cells | Normalized Pct Green Cells | Red Signal | Actual Pct Red Cells | Normalized Pct Red Cells |
|          | 100                      |  | 100                    |  | 0.1 uM           | 86.81        | 0.76                   | -49.47                     | 72.35      | 0.04                 | -37.45                   |
|          | 0                        |  | 0                      |  | 1 uM             | 87.19        | 0.70                   | -18.94                     | 77.03      | 0.02                 | -44.75                   |
|          | 0.1 uM                   |  | 0.1 uM                 |  | 10 uM            | 125.42       | 0.98                   | 486.31                     | 118.73     | 0.17                 | 21.34                    |

Compound

Normalized Values (A and B Sets)

Responses

| NSC 23766 | Percent Green Cells (AB) |  | Percent Red Cells (AB) |  | Average Response |              |                        |                            |            |                      |                          |
|-----------|--------------------------|--|------------------------|--|------------------|--------------|------------------------|----------------------------|------------|----------------------|--------------------------|
|           | Percent Response         |  | Percent Response       |  | Dose             | Green Signal | Actual Pct Green Cells | Normalized Pct Green Cells | Red Signal | Actual Pct Red Cells | Normalized Pct Red Cells |
|           | 100                      |  | 100                    |  | 0.1 uM           | 84.93        | 0.73                   | -46.93                     | 80.98      | 0.05                 | -43.45                   |
|           | 0                        |  | 0                      |  | 1 uM             | 87.86        | 0.81                   | 419.82                     | 90.76      | 0.09                 | 1.86                     |
|           | 0.1 uM                   |  | 0.1 uM                 |  | 10 uM            | 94.34        | 0.88                   | 64.75                      | 88.02      | 0.12                 | 0.50                     |

Compound

Normalized Values (A and B Sets)

Responses

| NSC 405020 | Percent Green Cells (AB) |  | Percent Red Cells (AB)  |  | Average Response |              |                        |                            |            |                      |                          |
|------------|--------------------------|--|-------------------------|--|------------------|--------------|------------------------|----------------------------|------------|----------------------|--------------------------|
|            | 100<br>Percent Response  |  | 100<br>Percent Response |  | Dose             | Green Signal | Actual Pct Green Cells | Normalized Pct Green Cells | Red Signal | Actual Pct Red Cells | Normalized Pct Red Cells |
|            | 0.1 uM 1 uM 10 uM        |  | 0.1 uM 1 uM 10 uM       |  | 0.1 uM           | 88.59        | 0.85                   | 60.03                      | 90.23      | 0.07                 | -28.79                   |
|            | concentration            |  | concentration           |  | 1 uM             | 91.79        | 0.86                   | 7.59                       | 88.69      | 0.08                 | -10.13                   |
|            |                          |  |                         |  | 10 uM            | 93.11        | 0.84                   | 31.95                      | 75.95      | 0.05                 | -29.67                   |

Compound

Normalized Values (A and B Sets)

Responses

| NSC 663284 | Percent Green Cells (AB) |  | Percent Red Cells (AB)  |  | Average Response |              |                        |                            |            |                      |                          |
|------------|--------------------------|--|-------------------------|--|------------------|--------------|------------------------|----------------------------|------------|----------------------|--------------------------|
|            | 100<br>Percent Response  |  | 100<br>Percent Response |  | Dose             | Green Signal | Actual Pct Green Cells | Normalized Pct Green Cells | Red Signal | Actual Pct Red Cells | Normalized Pct Red Cells |
|            | 0.1 uM 1 uM 10 uM        |  | 0.1 uM 1 uM 10 uM       |  | 0.1 uM           | 99.85        | 0.89                   | 97.60                      | 98.11      | 0.09                 | -19.40                   |
|            | concentration            |  | concentration           |  | 1 uM             | 111.70       | 0.95                   | 249.36                     | 73.79      | 0.02                 | -37.33                   |
|            |                          |  |                         |  | 10 uM            | 100.28       | 0.90                   | 88.99                      | 74.12      | 0.05                 | -27.90                   |

Compound

Normalized Values (A and B Sets)

Responses

| NU6027 | Percent Green Cells (AB) |  | Percent Red Cells (AB)  |  | Average Response |              |                        |                            |            |                      |                          |
|--------|--------------------------|--|-------------------------|--|------------------|--------------|------------------------|----------------------------|------------|----------------------|--------------------------|
|        | 100<br>Percent Response  |  | 100<br>Percent Response |  | Dose             | Green Signal | Actual Pct Green Cells | Normalized Pct Green Cells | Red Signal | Actual Pct Red Cells | Normalized Pct Red Cells |
|        | 0.1 uM 1 uM 10 uM        |  | 0.1 uM 1 uM 10 uM       |  | 0.1 uM           | 101.38       | 0.91                   | 155.27                     | 104.00     | 0.14                 | 8.80                     |
|        | concentration            |  | concentration           |  | 1 uM             | 98.76        | 0.82                   | 67.60                      | 92.40      | 0.09                 | -21.08                   |
|        |                          |  |                         |  | 10 uM            | 117.25       | 0.97                   | 196.74                     | 111.88     | 0.17                 | 27.60                    |

Compound

Normalized Values (A and B Sets)

Responses

| NU7441 (KU-57788) | Percent Green Cells (AB) |  | Percent Red Cells (AB)  |  | Average Response |              |                        |                            |            |                      |                          |
|-------------------|--------------------------|--|-------------------------|--|------------------|--------------|------------------------|----------------------------|------------|----------------------|--------------------------|
|                   | 100<br>Percent Response  |  | 100<br>Percent Response |  | Dose             | Green Signal | Actual Pct Green Cells | Normalized Pct Green Cells | Red Signal | Actual Pct Red Cells | Normalized Pct Red Cells |
|                   | 0.1 uM 1 uM 10 uM        |  | 0.1 uM 1 uM 10 uM       |  | 0.1 uM           | 112.75       | 0.96                   | 167.36                     | 112.57     | 0.17                 | 28.71                    |
|                   | concentration            |  | concentration           |  | 1 uM             | 99.74        | 0.81                   | 46.22                      | 85.74      | 0.05                 | -34.83                   |
|                   |                          |  |                         |  | 10 uM            | 104.26       | 0.95                   | 256.97                     | 81.35      | 0.04                 | -41.41                   |

Compound

Normalized Values (A and B Sets)

Responses

| Nutlin-3 | Percent Green Cells (AB) |  | Percent Red Cells (AB)  |  | Average Response |              |                        |                            |            |                      |                          |
|----------|--------------------------|--|-------------------------|--|------------------|--------------|------------------------|----------------------------|------------|----------------------|--------------------------|
|          | 100<br>Percent Response  |  | 100<br>Percent Response |  | Dose             | Green Signal | Actual Pct Green Cells | Normalized Pct Green Cells | Red Signal | Actual Pct Red Cells | Normalized Pct Red Cells |
|          | 0.1 uM 1 uM 10 uM        |  | 0.1 uM 1 uM 10 uM       |  | 0.1 uM           | 93.83        | 0.83                   | 46.99                      | 76.44      | 0.03                 | -58.29                   |
|          | concentration            |  | concentration           |  | 1 uM             | 95.88        | 0.85                   | 67.18                      | 104.10     | 0.10                 | -12.92                   |
|          |                          |  |                         |  | 10 uM            | 94.76        | 0.84                   | 76.56                      | 124.50     | 0.14                 | 6.19                     |





Compound

Normalized Values (A and B Sets)

Responses

|                |       |                         |              |                        |                            |            |                      |                          |
|----------------|-------|-------------------------|--------------|------------------------|----------------------------|------------|----------------------|--------------------------|
| <b>NXY-059</b> |       | <b>Average Response</b> |              |                        |                            |            |                      |                          |
|                |       | Dose                    | Green Signal | Actual Pct Green Cells | Normalized Pct Green Cells | Red Signal | Actual Pct Red Cells | Normalized Pct Red Cells |
|                |       | 0.1 uM                  | 97.69        | 0.81                   | 143.65                     | 82.83      | 0.05                 | -37.22                   |
|                |       | 1 uM                    | 96.98        | 0.84                   | 83.98                      | 97.41      | 0.08                 | -27.29                   |
| 10 uM          | 93.24 | 0.79                    | 9.73         | 77.78                  | 0.03                       | -48.23     |                      |                          |

Compound

Normalized Values (A and B Sets)

Responses

|                              |       |                         |              |                        |                            |            |                      |                          |
|------------------------------|-------|-------------------------|--------------|------------------------|----------------------------|------------|----------------------|--------------------------|
| <b>Nystatin (Fungicidin)</b> |       | <b>Average Response</b> |              |                        |                            |            |                      |                          |
|                              |       | Dose                    | Green Signal | Actual Pct Green Cells | Normalized Pct Green Cells | Red Signal | Actual Pct Red Cells | Normalized Pct Red Cells |
|                              |       | 0.1 uM                  | 99.06        | 0.86                   | 45.64                      | 106.78     | 0.11                 | -18.22                   |
|                              |       | 1 uM                    | 90.39        | 0.78                   | 3.98                       | 94.54      | 0.07                 | -25.97                   |
| 10 uM                        | 91.50 | 0.74                    | 13.68        | 87.43                  | 0.04                       | -33.69     |                      |                          |

Compound

Normalized Values (A and B Sets)

Responses

|             |       |                         |              |                        |                            |            |                      |                          |
|-------------|-------|-------------------------|--------------|------------------------|----------------------------|------------|----------------------|--------------------------|
| <b>OAC1</b> |       | <b>Average Response</b> |              |                        |                            |            |                      |                          |
|             |       | Dose                    | Green Signal | Actual Pct Green Cells | Normalized Pct Green Cells | Red Signal | Actual Pct Red Cells | Normalized Pct Red Cells |
|             |       | 0.1 uM                  | 114.31       | 0.95                   | 152.37                     | 85.06      | 0.04                 | -49.42                   |
|             |       | 1 uM                    | 96.86        | 0.84                   | 1.46                       | 88.96      | 0.08                 | -18.77                   |
| 10 uM       | 97.18 | 0.90                    | 79.98        | 85.20                  | 0.08                       | -16.37     |                      |                          |

Compound

Normalized Values (A and B Sets)

Responses

|                                      |        |                         |              |                        |                            |            |                      |                          |
|--------------------------------------|--------|-------------------------|--------------|------------------------|----------------------------|------------|----------------------|--------------------------|
| <b>Obatoclox Mesylate (GX15-070)</b> |        | <b>Average Response</b> |              |                        |                            |            |                      |                          |
|                                      |        | Dose                    | Green Signal | Actual Pct Green Cells | Normalized Pct Green Cells | Red Signal | Actual Pct Red Cells | Normalized Pct Red Cells |
|                                      |        | 0.1 uM                  | 95.05        | 0.85                   | 81.27                      | 109.84     | 0.12                 | -8.45                    |
|                                      |        | 1 uM                    | 104.58       | 0.84                   | 78.24                      | 7.97       | 0.02                 | -46.73                   |
| 10 uM                                | 115.49 | 0.77                    | 21.66        | 0.00                   | 0.00                       | -52.84     |                      |                          |

Compound

Normalized Values (A and B Sets)

Responses

|                 |       |                         |              |                        |                            |            |                      |                          |
|-----------------|-------|-------------------------|--------------|------------------------|----------------------------|------------|----------------------|--------------------------|
| <b>OC000459</b> |       | <b>Average Response</b> |              |                        |                            |            |                      |                          |
|                 |       | Dose                    | Green Signal | Actual Pct Green Cells | Normalized Pct Green Cells | Red Signal | Actual Pct Red Cells | Normalized Pct Red Cells |
|                 |       | 0.1 uM                  | 109.42       | 0.94                   | 149.60                     | 87.71      | 0.08                 | -18.16                   |
|                 |       | 1 uM                    | 108.00       | 0.91                   | 106.94                     | 88.49      | 0.06                 | -27.41                   |
| 10 uM           | 99.40 | 0.90                    | -62.76       | 93.51                  | 0.07                       | -26.61     |                      |                          |

| Compound                    | Normalized Values (A and B Sets) | Responses                                                                                                                                                                                                                                                                                                                                                                                                                                                                                                                                                                                                                                                                       |                  |                        |                            |            |                      |                          |  |      |              |                        |                            |            |                      |                          |        |       |      |       |       |      |        |      |       |      |       |        |      |        |       |       |      |       |       |      |        |
|-----------------------------|----------------------------------|---------------------------------------------------------------------------------------------------------------------------------------------------------------------------------------------------------------------------------------------------------------------------------------------------------------------------------------------------------------------------------------------------------------------------------------------------------------------------------------------------------------------------------------------------------------------------------------------------------------------------------------------------------------------------------|------------------|------------------------|----------------------------|------------|----------------------|--------------------------|--|------|--------------|------------------------|----------------------------|------------|----------------------|--------------------------|--------|-------|------|-------|-------|------|--------|------|-------|------|-------|--------|------|--------|-------|-------|------|-------|-------|------|--------|
| <b>Odanacatib (MK-0822)</b> |                                  | <table border="1"> <thead> <tr> <th colspan="7">Average Response</th> </tr> <tr> <th>Dose</th> <th>Green Signal</th> <th>Actual Pct Green Cells</th> <th>Normalized Pct Green Cells</th> <th>Red Signal</th> <th>Actual Pct Red Cells</th> <th>Normalized Pct Red Cells</th> </tr> </thead> <tbody> <tr> <td>0.1 uM</td> <td>89.23</td> <td>0.84</td> <td>30.56</td> <td>79.83</td> <td>0.02</td> <td>-63.79</td> </tr> <tr> <td>1 uM</td> <td>91.37</td> <td>0.78</td> <td>25.10</td> <td>102.61</td> <td>0.08</td> <td>-19.41</td> </tr> <tr> <td>10 uM</td> <td>93.06</td> <td>0.78</td> <td>31.81</td> <td>85.27</td> <td>0.04</td> <td>-38.75</td> </tr> </tbody> </table> | Average Response |                        |                            |            |                      |                          |  | Dose | Green Signal | Actual Pct Green Cells | Normalized Pct Green Cells | Red Signal | Actual Pct Red Cells | Normalized Pct Red Cells | 0.1 uM | 89.23 | 0.84 | 30.56 | 79.83 | 0.02 | -63.79 | 1 uM | 91.37 | 0.78 | 25.10 | 102.61 | 0.08 | -19.41 | 10 uM | 93.06 | 0.78 | 31.81 | 85.27 | 0.04 | -38.75 |
|                             |                                  | Average Response                                                                                                                                                                                                                                                                                                                                                                                                                                                                                                                                                                                                                                                                |                  |                        |                            |            |                      |                          |  |      |              |                        |                            |            |                      |                          |        |       |      |       |       |      |        |      |       |      |       |        |      |        |       |       |      |       |       |      |        |
|                             |                                  | Dose                                                                                                                                                                                                                                                                                                                                                                                                                                                                                                                                                                                                                                                                            | Green Signal     | Actual Pct Green Cells | Normalized Pct Green Cells | Red Signal | Actual Pct Red Cells | Normalized Pct Red Cells |  |      |              |                        |                            |            |                      |                          |        |       |      |       |       |      |        |      |       |      |       |        |      |        |       |       |      |       |       |      |        |
|                             |                                  | 0.1 uM                                                                                                                                                                                                                                                                                                                                                                                                                                                                                                                                                                                                                                                                          | 89.23            | 0.84                   | 30.56                      | 79.83      | 0.02                 | -63.79                   |  |      |              |                        |                            |            |                      |                          |        |       |      |       |       |      |        |      |       |      |       |        |      |        |       |       |      |       |       |      |        |
| 1 uM                        | 91.37                            | 0.78                                                                                                                                                                                                                                                                                                                                                                                                                                                                                                                                                                                                                                                                            | 25.10            | 102.61                 | 0.08                       | -19.41     |                      |                          |  |      |              |                        |                            |            |                      |                          |        |       |      |       |       |      |        |      |       |      |       |        |      |        |       |       |      |       |       |      |        |
| 10 uM                       | 93.06                            | 0.78                                                                                                                                                                                                                                                                                                                                                                                                                                                                                                                                                                                                                                                                            | 31.81            | 85.27                  | 0.04                       | -38.75     |                      |                          |  |      |              |                        |                            |            |                      |                          |        |       |      |       |       |      |        |      |       |      |       |        |      |        |       |       |      |       |       |      |        |

| Compound       | Normalized Values (A and B Sets) | Responses                                                                                                                                                                                                                                                                                                                                                                                                                                                                                                                                                                                                                                                                        |                  |                        |                            |            |                      |                          |  |      |              |                        |                            |            |                      |                          |        |       |      |        |       |      |        |      |       |      |        |       |      |        |       |       |      |       |       |      |        |
|----------------|----------------------------------|----------------------------------------------------------------------------------------------------------------------------------------------------------------------------------------------------------------------------------------------------------------------------------------------------------------------------------------------------------------------------------------------------------------------------------------------------------------------------------------------------------------------------------------------------------------------------------------------------------------------------------------------------------------------------------|------------------|------------------------|----------------------------|------------|----------------------|--------------------------|--|------|--------------|------------------------|----------------------------|------------|----------------------|--------------------------|--------|-------|------|--------|-------|------|--------|------|-------|------|--------|-------|------|--------|-------|-------|------|-------|-------|------|--------|
| <b>OG-L002</b> |                                  | <table border="1"> <thead> <tr> <th colspan="7">Average Response</th> </tr> <tr> <th>Dose</th> <th>Green Signal</th> <th>Actual Pct Green Cells</th> <th>Normalized Pct Green Cells</th> <th>Red Signal</th> <th>Actual Pct Red Cells</th> <th>Normalized Pct Red Cells</th> </tr> </thead> <tbody> <tr> <td>0.1 uM</td> <td>97.91</td> <td>0.89</td> <td>100.47</td> <td>91.61</td> <td>0.06</td> <td>-39.09</td> </tr> <tr> <td>1 uM</td> <td>94.43</td> <td>0.86</td> <td>114.42</td> <td>62.91</td> <td>0.01</td> <td>-43.93</td> </tr> <tr> <td>10 uM</td> <td>90.40</td> <td>0.83</td> <td>17.40</td> <td>76.78</td> <td>0.04</td> <td>-34.35</td> </tr> </tbody> </table> | Average Response |                        |                            |            |                      |                          |  | Dose | Green Signal | Actual Pct Green Cells | Normalized Pct Green Cells | Red Signal | Actual Pct Red Cells | Normalized Pct Red Cells | 0.1 uM | 97.91 | 0.89 | 100.47 | 91.61 | 0.06 | -39.09 | 1 uM | 94.43 | 0.86 | 114.42 | 62.91 | 0.01 | -43.93 | 10 uM | 90.40 | 0.83 | 17.40 | 76.78 | 0.04 | -34.35 |
|                |                                  | Average Response                                                                                                                                                                                                                                                                                                                                                                                                                                                                                                                                                                                                                                                                 |                  |                        |                            |            |                      |                          |  |      |              |                        |                            |            |                      |                          |        |       |      |        |       |      |        |      |       |      |        |       |      |        |       |       |      |       |       |      |        |
|                |                                  | Dose                                                                                                                                                                                                                                                                                                                                                                                                                                                                                                                                                                                                                                                                             | Green Signal     | Actual Pct Green Cells | Normalized Pct Green Cells | Red Signal | Actual Pct Red Cells | Normalized Pct Red Cells |  |      |              |                        |                            |            |                      |                          |        |       |      |        |       |      |        |      |       |      |        |       |      |        |       |       |      |       |       |      |        |
|                |                                  | 0.1 uM                                                                                                                                                                                                                                                                                                                                                                                                                                                                                                                                                                                                                                                                           | 97.91            | 0.89                   | 100.47                     | 91.61      | 0.06                 | -39.09                   |  |      |              |                        |                            |            |                      |                          |        |       |      |        |       |      |        |      |       |      |        |       |      |        |       |       |      |       |       |      |        |
| 1 uM           | 94.43                            | 0.86                                                                                                                                                                                                                                                                                                                                                                                                                                                                                                                                                                                                                                                                             | 114.42           | 62.91                  | 0.01                       | -43.93     |                      |                          |  |      |              |                        |                            |            |                      |                          |        |       |      |        |       |      |        |      |       |      |        |       |      |        |       |       |      |       |       |      |        |
| 10 uM          | 90.40                            | 0.83                                                                                                                                                                                                                                                                                                                                                                                                                                                                                                                                                                                                                                                                             | 17.40            | 76.78                  | 0.04                       | -34.35     |                      |                          |  |      |              |                        |                            |            |                      |                          |        |       |      |        |       |      |        |      |       |      |        |       |      |        |       |       |      |       |       |      |        |

| Compound              | Normalized Values (A and B Sets) | Responses                                                                                                                                                                                                                                                                                                                                                                                                                                                                                                                                                                                                                                                                        |                  |                        |                            |            |                      |                          |  |      |              |                        |                            |            |                      |                          |        |       |      |       |       |      |        |      |        |      |       |        |      |       |       |       |      |        |       |      |        |
|-----------------------|----------------------------------|----------------------------------------------------------------------------------------------------------------------------------------------------------------------------------------------------------------------------------------------------------------------------------------------------------------------------------------------------------------------------------------------------------------------------------------------------------------------------------------------------------------------------------------------------------------------------------------------------------------------------------------------------------------------------------|------------------|------------------------|----------------------------|------------|----------------------|--------------------------|--|------|--------------|------------------------|----------------------------|------------|----------------------|--------------------------|--------|-------|------|-------|-------|------|--------|------|--------|------|-------|--------|------|-------|-------|-------|------|--------|-------|------|--------|
| <b>Oleanolic Acid</b> |                                  | <table border="1"> <thead> <tr> <th colspan="7">Average Response</th> </tr> <tr> <th>Dose</th> <th>Green Signal</th> <th>Actual Pct Green Cells</th> <th>Normalized Pct Green Cells</th> <th>Red Signal</th> <th>Actual Pct Red Cells</th> <th>Normalized Pct Red Cells</th> </tr> </thead> <tbody> <tr> <td>0.1 uM</td> <td>88.04</td> <td>0.83</td> <td>28.59</td> <td>78.19</td> <td>0.04</td> <td>-36.33</td> </tr> <tr> <td>1 uM</td> <td>101.54</td> <td>0.84</td> <td>75.30</td> <td>100.39</td> <td>0.11</td> <td>-7.97</td> </tr> <tr> <td>10 uM</td> <td>97.24</td> <td>0.90</td> <td>151.54</td> <td>74.22</td> <td>0.02</td> <td>-47.06</td> </tr> </tbody> </table> | Average Response |                        |                            |            |                      |                          |  | Dose | Green Signal | Actual Pct Green Cells | Normalized Pct Green Cells | Red Signal | Actual Pct Red Cells | Normalized Pct Red Cells | 0.1 uM | 88.04 | 0.83 | 28.59 | 78.19 | 0.04 | -36.33 | 1 uM | 101.54 | 0.84 | 75.30 | 100.39 | 0.11 | -7.97 | 10 uM | 97.24 | 0.90 | 151.54 | 74.22 | 0.02 | -47.06 |
|                       |                                  | Average Response                                                                                                                                                                                                                                                                                                                                                                                                                                                                                                                                                                                                                                                                 |                  |                        |                            |            |                      |                          |  |      |              |                        |                            |            |                      |                          |        |       |      |       |       |      |        |      |        |      |       |        |      |       |       |       |      |        |       |      |        |
|                       |                                  | Dose                                                                                                                                                                                                                                                                                                                                                                                                                                                                                                                                                                                                                                                                             | Green Signal     | Actual Pct Green Cells | Normalized Pct Green Cells | Red Signal | Actual Pct Red Cells | Normalized Pct Red Cells |  |      |              |                        |                            |            |                      |                          |        |       |      |       |       |      |        |      |        |      |       |        |      |       |       |       |      |        |       |      |        |
|                       |                                  | 0.1 uM                                                                                                                                                                                                                                                                                                                                                                                                                                                                                                                                                                                                                                                                           | 88.04            | 0.83                   | 28.59                      | 78.19      | 0.04                 | -36.33                   |  |      |              |                        |                            |            |                      |                          |        |       |      |       |       |      |        |      |        |      |       |        |      |       |       |       |      |        |       |      |        |
| 1 uM                  | 101.54                           | 0.84                                                                                                                                                                                                                                                                                                                                                                                                                                                                                                                                                                                                                                                                             | 75.30            | 100.39                 | 0.11                       | -7.97      |                      |                          |  |      |              |                        |                            |            |                      |                          |        |       |      |       |       |      |        |      |        |      |       |        |      |       |       |       |      |        |       |      |        |
| 10 uM                 | 97.24                            | 0.90                                                                                                                                                                                                                                                                                                                                                                                                                                                                                                                                                                                                                                                                             | 151.54           | 74.22                  | 0.02                       | -47.06     |                      |                          |  |      |              |                        |                            |            |                      |                          |        |       |      |       |       |      |        |      |        |      |       |        |      |       |       |       |      |        |       |      |        |

| Compound            | Normalized Values (A and B Sets) | Responses                                                                                                                                                                                                                                                                                                                                                                                                                                                                                                                                                                                                                                                                          |                  |                        |                            |            |                      |                          |  |      |              |                        |                            |            |                      |                          |        |        |      |        |       |      |        |      |        |      |       |        |      |        |       |       |      |       |        |      |       |
|---------------------|----------------------------------|------------------------------------------------------------------------------------------------------------------------------------------------------------------------------------------------------------------------------------------------------------------------------------------------------------------------------------------------------------------------------------------------------------------------------------------------------------------------------------------------------------------------------------------------------------------------------------------------------------------------------------------------------------------------------------|------------------|------------------------|----------------------------|------------|----------------------|--------------------------|--|------|--------------|------------------------|----------------------------|------------|----------------------|--------------------------|--------|--------|------|--------|-------|------|--------|------|--------|------|-------|--------|------|--------|-------|-------|------|-------|--------|------|-------|
| <b>Oligomycin A</b> |                                  | <table border="1"> <thead> <tr> <th colspan="7">Average Response</th> </tr> <tr> <th>Dose</th> <th>Green Signal</th> <th>Actual Pct Green Cells</th> <th>Normalized Pct Green Cells</th> <th>Red Signal</th> <th>Actual Pct Red Cells</th> <th>Normalized Pct Red Cells</th> </tr> </thead> <tbody> <tr> <td>0.1 uM</td> <td>119.47</td> <td>0.95</td> <td>146.21</td> <td>96.40</td> <td>0.08</td> <td>-31.21</td> </tr> <tr> <td>1 uM</td> <td>102.60</td> <td>0.86</td> <td>95.35</td> <td>100.36</td> <td>0.08</td> <td>-19.59</td> </tr> <tr> <td>10 uM</td> <td>97.23</td> <td>0.79</td> <td>26.73</td> <td>113.68</td> <td>0.11</td> <td>-4.91</td> </tr> </tbody> </table> | Average Response |                        |                            |            |                      |                          |  | Dose | Green Signal | Actual Pct Green Cells | Normalized Pct Green Cells | Red Signal | Actual Pct Red Cells | Normalized Pct Red Cells | 0.1 uM | 119.47 | 0.95 | 146.21 | 96.40 | 0.08 | -31.21 | 1 uM | 102.60 | 0.86 | 95.35 | 100.36 | 0.08 | -19.59 | 10 uM | 97.23 | 0.79 | 26.73 | 113.68 | 0.11 | -4.91 |
|                     |                                  | Average Response                                                                                                                                                                                                                                                                                                                                                                                                                                                                                                                                                                                                                                                                   |                  |                        |                            |            |                      |                          |  |      |              |                        |                            |            |                      |                          |        |        |      |        |       |      |        |      |        |      |       |        |      |        |       |       |      |       |        |      |       |
|                     |                                  | Dose                                                                                                                                                                                                                                                                                                                                                                                                                                                                                                                                                                                                                                                                               | Green Signal     | Actual Pct Green Cells | Normalized Pct Green Cells | Red Signal | Actual Pct Red Cells | Normalized Pct Red Cells |  |      |              |                        |                            |            |                      |                          |        |        |      |        |       |      |        |      |        |      |       |        |      |        |       |       |      |       |        |      |       |
|                     |                                  | 0.1 uM                                                                                                                                                                                                                                                                                                                                                                                                                                                                                                                                                                                                                                                                             | 119.47           | 0.95                   | 146.21                     | 96.40      | 0.08                 | -31.21                   |  |      |              |                        |                            |            |                      |                          |        |        |      |        |       |      |        |      |        |      |       |        |      |        |       |       |      |       |        |      |       |
| 1 uM                | 102.60                           | 0.86                                                                                                                                                                                                                                                                                                                                                                                                                                                                                                                                                                                                                                                                               | 95.35            | 100.36                 | 0.08                       | -19.59     |                      |                          |  |      |              |                        |                            |            |                      |                          |        |        |      |        |       |      |        |      |        |      |       |        |      |        |       |       |      |       |        |      |       |
| 10 uM               | 97.23                            | 0.79                                                                                                                                                                                                                                                                                                                                                                                                                                                                                                                                                                                                                                                                               | 26.73            | 113.68                 | 0.11                       | -4.91      |                      |                          |  |      |              |                        |                            |            |                      |                          |        |        |      |        |       |      |        |      |        |      |       |        |      |        |       |       |      |       |        |      |       |

| Compound                 | Normalized Values (A and B Sets) | Responses                                                                                                                                                                                                                                                                                                                                                                                                                                                                                                                                                                                                                                                                         |                  |                        |                            |            |                      |                          |  |      |              |                        |                            |            |                      |                          |        |       |      |        |       |      |        |      |       |      |        |       |      |        |       |       |      |        |       |      |        |
|--------------------------|----------------------------------|-----------------------------------------------------------------------------------------------------------------------------------------------------------------------------------------------------------------------------------------------------------------------------------------------------------------------------------------------------------------------------------------------------------------------------------------------------------------------------------------------------------------------------------------------------------------------------------------------------------------------------------------------------------------------------------|------------------|------------------------|----------------------------|------------|----------------------|--------------------------|--|------|--------------|------------------------|----------------------------|------------|----------------------|--------------------------|--------|-------|------|--------|-------|------|--------|------|-------|------|--------|-------|------|--------|-------|-------|------|--------|-------|------|--------|
| <b>Olsalazine Sodium</b> |                                  | <table border="1"> <thead> <tr> <th colspan="7">Average Response</th> </tr> <tr> <th>Dose</th> <th>Green Signal</th> <th>Actual Pct Green Cells</th> <th>Normalized Pct Green Cells</th> <th>Red Signal</th> <th>Actual Pct Red Cells</th> <th>Normalized Pct Red Cells</th> </tr> </thead> <tbody> <tr> <td>0.1 uM</td> <td>82.97</td> <td>0.78</td> <td>183.46</td> <td>55.97</td> <td>0.01</td> <td>-59.38</td> </tr> <tr> <td>1 uM</td> <td>77.74</td> <td>0.59</td> <td>-88.91</td> <td>73.25</td> <td>0.02</td> <td>-57.57</td> </tr> <tr> <td>10 uM</td> <td>84.40</td> <td>0.73</td> <td>-37.59</td> <td>92.29</td> <td>0.06</td> <td>-35.01</td> </tr> </tbody> </table> | Average Response |                        |                            |            |                      |                          |  | Dose | Green Signal | Actual Pct Green Cells | Normalized Pct Green Cells | Red Signal | Actual Pct Red Cells | Normalized Pct Red Cells | 0.1 uM | 82.97 | 0.78 | 183.46 | 55.97 | 0.01 | -59.38 | 1 uM | 77.74 | 0.59 | -88.91 | 73.25 | 0.02 | -57.57 | 10 uM | 84.40 | 0.73 | -37.59 | 92.29 | 0.06 | -35.01 |
|                          |                                  | Average Response                                                                                                                                                                                                                                                                                                                                                                                                                                                                                                                                                                                                                                                                  |                  |                        |                            |            |                      |                          |  |      |              |                        |                            |            |                      |                          |        |       |      |        |       |      |        |      |       |      |        |       |      |        |       |       |      |        |       |      |        |
|                          |                                  | Dose                                                                                                                                                                                                                                                                                                                                                                                                                                                                                                                                                                                                                                                                              | Green Signal     | Actual Pct Green Cells | Normalized Pct Green Cells | Red Signal | Actual Pct Red Cells | Normalized Pct Red Cells |  |      |              |                        |                            |            |                      |                          |        |       |      |        |       |      |        |      |       |      |        |       |      |        |       |       |      |        |       |      |        |
|                          |                                  | 0.1 uM                                                                                                                                                                                                                                                                                                                                                                                                                                                                                                                                                                                                                                                                            | 82.97            | 0.78                   | 183.46                     | 55.97      | 0.01                 | -59.38                   |  |      |              |                        |                            |            |                      |                          |        |       |      |        |       |      |        |      |       |      |        |       |      |        |       |       |      |        |       |      |        |
| 1 uM                     | 77.74                            | 0.59                                                                                                                                                                                                                                                                                                                                                                                                                                                                                                                                                                                                                                                                              | -88.91           | 73.25                  | 0.02                       | -57.57     |                      |                          |  |      |              |                        |                            |            |                      |                          |        |       |      |        |       |      |        |      |       |      |        |       |      |        |       |       |      |        |       |      |        |
| 10 uM                    | 84.40                            | 0.73                                                                                                                                                                                                                                                                                                                                                                                                                                                                                                                                                                                                                                                                              | -37.59           | 92.29                  | 0.06                       | -35.01     |                      |                          |  |      |              |                        |                            |            |                      |                          |        |       |      |        |       |      |        |      |       |      |        |       |      |        |       |       |      |        |       |      |        |

Compound

Normalized Values (A and B Sets)

Responses

| Omecamtiv mecarbil (CK-1827452) |        |      | Average Response |              |                        |                            |            |                      |                          |
|---------------------------------|--------|------|------------------|--------------|------------------------|----------------------------|------------|----------------------|--------------------------|
|                                 |        |      | Dose             | Green Signal | Actual Pct Green Cells | Normalized Pct Green Cells | Red Signal | Actual Pct Red Cells | Normalized Pct Red Cells |
|                                 |        |      | 0.1 uM           | 98.68        | 0.90                   | 99.75                      | 102.94     | 0.12                 | -0.74                    |
|                                 |        |      | 1 uM             | 104.61       | 0.86                   | 86.76                      | 78.62      | 0.03                 | -41.48                   |
| 10 uM                           | 102.29 | 0.94 | 154.33           | 100.74       | 0.09                   | -16.28                     |            |                      |                          |

Compound

Normalized Values (A and B Sets)

Responses

| ONX-0914 (PR-957) |        |      | Average Response |              |                        |                            |            |                      |                          |        |
|-------------------|--------|------|------------------|--------------|------------------------|----------------------------|------------|----------------------|--------------------------|--------|
|                   |        |      | Dose             | Green Signal | Actual Pct Green Cells | Normalized Pct Green Cells | Red Signal | Actual Pct Red Cells | Normalized Pct Red Cells |        |
|                   |        |      | 0.1 uM           | 98.89        | 0.66                   | -                          | 647.83     | 79.04                | 0.06                     | -31.37 |
|                   |        |      | 1 uM             | 95.61        | 0.52                   | -                          | 137.48     | 79.35                | 0.01                     | -63.14 |
| 10 uM             | 100.52 | 0.97 | 181.11           | -            | 98.05                  | 0.14                       | 9.44       |                      |                          |        |

Compound

Normalized Values (A and B Sets)

Responses

| Oprozomib (ONX 0912) |       |      | Average Response |              |                        |                            |            |                      |                          |        |
|----------------------|-------|------|------------------|--------------|------------------------|----------------------------|------------|----------------------|--------------------------|--------|
|                      |       |      | Dose             | Green Signal | Actual Pct Green Cells | Normalized Pct Green Cells | Red Signal | Actual Pct Red Cells | Normalized Pct Red Cells |        |
|                      |       |      | 0.1 uM           | 99.28        | 0.86                   | -                          | 118.36     | 98.92                | 0.08                     | -24.69 |
|                      |       |      | 1 uM             | 104.54       | 0.80                   | 58.03                      | 101.66     | 0.14                 | 4.95                     |        |
| 10 uM                | 90.81 | 0.77 | 87.26            | 83.61        | 0.04                   | -42.92                     |            |                      |                          |        |

Compound

Normalized Values (A and B Sets)

Responses

| Org 27569 |        |      | Average Response |              |                        |                            |            |                      |                          |
|-----------|--------|------|------------------|--------------|------------------------|----------------------------|------------|----------------------|--------------------------|
|           |        |      | Dose             | Green Signal | Actual Pct Green Cells | Normalized Pct Green Cells | Red Signal | Actual Pct Red Cells | Normalized Pct Red Cells |
|           |        |      | 0.1 uM           | 109.36       | 0.94                   | 126.81                     | 98.72      | 0.06                 | -43.92                   |
|           |        |      | 1 uM             | 98.07        | 0.81                   | 4.38                       | 58.89      | 0.01                 | -54.13                   |
| 10 uM     | 100.47 | 0.84 | 72.63            | 105.80       | 0.09                   | -18.48                     |            |                      |                          |

Compound

Normalized Values (A and B Sets)

Responses

| Oridonin |       |      | Average Response |              |                        |                            |            |                      |                          |
|----------|-------|------|------------------|--------------|------------------------|----------------------------|------------|----------------------|--------------------------|
|          |       |      | Dose             | Green Signal | Actual Pct Green Cells | Normalized Pct Green Cells | Red Signal | Actual Pct Red Cells | Normalized Pct Red Cells |
|          |       |      | 0.1 uM           | 85.66        | 0.79                   | -11.98                     | 77.09      | 0.04                 | -35.31                   |
| 1 uM     | 97.31 | 0.86 | 79.23            | 87.93        | 0.05                   | -33.82                     |            |                      |                          |

| Compound                             | Normalized Values (A and B Sets) | Responses                                   |              |                        |                            |            |                      |                          |
|--------------------------------------|----------------------------------|---------------------------------------------|--------------|------------------------|----------------------------|------------|----------------------|--------------------------|
|                                      |                                  | 10 uM 103.42 0.88 -132.82 82.05 0.06 -29.81 |              |                        |                            |            |                      |                          |
| Compound                             | Normalized Values (A and B Sets) | Responses                                   |              |                        |                            |            |                      |                          |
| <b>Orotic acid (6-Carboxyuracil)</b> |                                  | Average Response                            |              |                        |                            |            |                      |                          |
|                                      |                                  | Dose                                        | Green Signal | Actual Pct Green Cells | Normalized Pct Green Cells | Red Signal | Actual Pct Red Cells | Normalized Pct Red Cells |
|                                      |                                  | 0.1 uM                                      | 81.35        | 0.78                   | -13.93                     | 101.48     | 0.10                 | -8.20                    |
|                                      |                                  | 1 uM                                        | 88.34        | 0.76                   | 31.34                      | 94.92      | 0.07                 | -26.08                   |
| 10 uM                                | 103.25                           | 0.94                                        | 349.64       | 76.13                  | 0.02                       | -50.03     |                      |                          |
| Compound                             | Normalized Values (A and B Sets) | Responses                                   |              |                        |                            |            |                      |                          |
| <b>Oseltamivir phosphate</b>         |                                  | Average Response                            |              |                        |                            |            |                      |                          |
|                                      |                                  | Dose                                        | Green Signal | Actual Pct Green Cells | Normalized Pct Green Cells | Red Signal | Actual Pct Red Cells | Normalized Pct Red Cells |
|                                      |                                  | 0.1 uM                                      | 95.56        | 0.87                   | 81.54                      | 98.53      | 0.10                 | -10.09                   |
|                                      |                                  | 1 uM                                        | 105.73       | 0.89                   | 98.94                      | 102.03     | 0.12                 | -2.43                    |
| 10 uM                                | 99.82                            | 0.91                                        | 73.31        | 103.43                 | 0.09                       | -14.26     |                      |                          |
| Compound                             | Normalized Values (A and B Sets) | Responses                                   |              |                        |                            |            |                      |                          |
| <b>OSI-027</b>                       |                                  | Average Response                            |              |                        |                            |            |                      |                          |
|                                      |                                  | Dose                                        | Green Signal | Actual Pct Green Cells | Normalized Pct Green Cells | Red Signal | Actual Pct Red Cells | Normalized Pct Red Cells |
|                                      |                                  | 0.1 uM                                      | 95.37        | 0.89                   | 95.24                      | 78.24      | 0.05                 | -33.67                   |
|                                      |                                  | 1 uM                                        | 96.55        | 0.83                   | 67.38                      | 93.63      | 0.09                 | -14.11                   |
| 10 uM                                | 90.43                            | 0.91                                        | 399.61       | 90.03                  | 0.07                       | -23.91     |                      |                          |
| Compound                             | Normalized Values (A and B Sets) | Responses                                   |              |                        |                            |            |                      |                          |
| <b>OSI-420</b>                       |                                  | Average Response                            |              |                        |                            |            |                      |                          |
|                                      |                                  | Dose                                        | Green Signal | Actual Pct Green Cells | Normalized Pct Green Cells | Red Signal | Actual Pct Red Cells | Normalized Pct Red Cells |
|                                      |                                  | 0.1 uM                                      | 83.52        | 0.71                   | -111.89                    | 60.21      | 0.01                 | -51.55                   |
|                                      |                                  | 1 uM                                        | 95.99        | 0.88                   | 89.51                      | 119.59     | 0.20                 | 32.68                    |
| 10 uM                                | 94.46                            | 0.94                                        | 332.16       | 94.50                  | 0.05                       | -32.39     |                      |                          |
| Compound                             | Normalized Values (A and B Sets) | Responses                                   |              |                        |                            |            |                      |                          |
| <b>OSI-906 (Linsitinib)</b>          |                                  | Average Response                            |              |                        |                            |            |                      |                          |
|                                      |                                  | Dose                                        | Green Signal | Actual Pct Green Cells | Normalized Pct Green Cells | Red Signal | Actual Pct Red Cells | Normalized Pct Red Cells |

Compound

Normalized Values (A and B Sets)

Responses

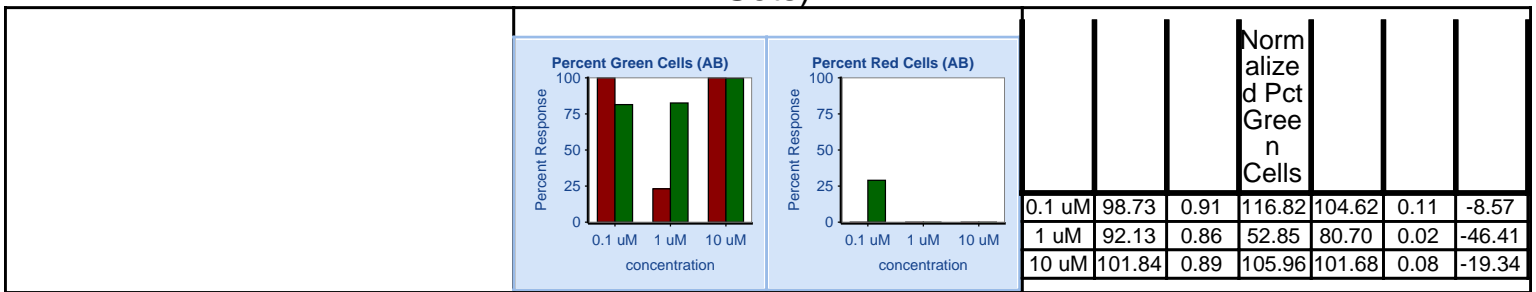

Compound

Normalized Values (A and B Sets)

Responses

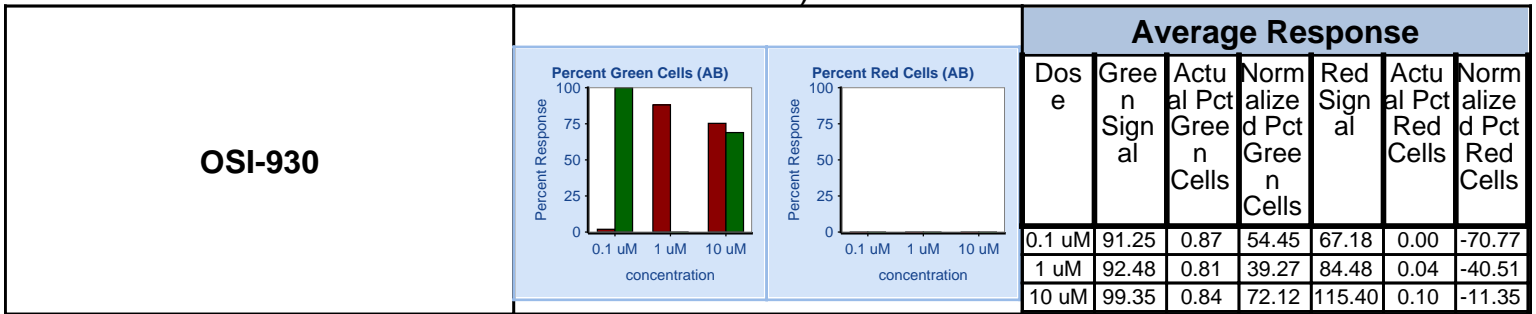

Compound

Normalized Values (A and B Sets)

Responses

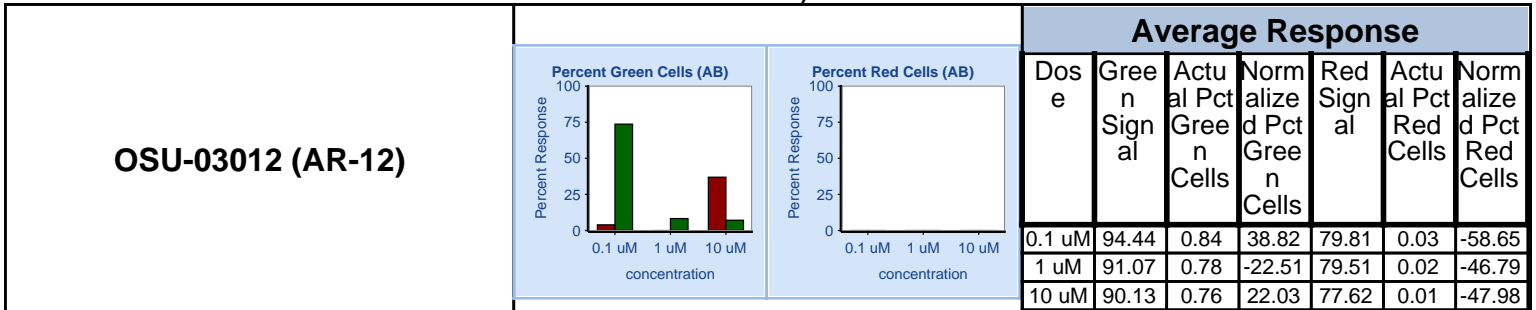

Compound

Normalized Values (A and B Sets)

Responses

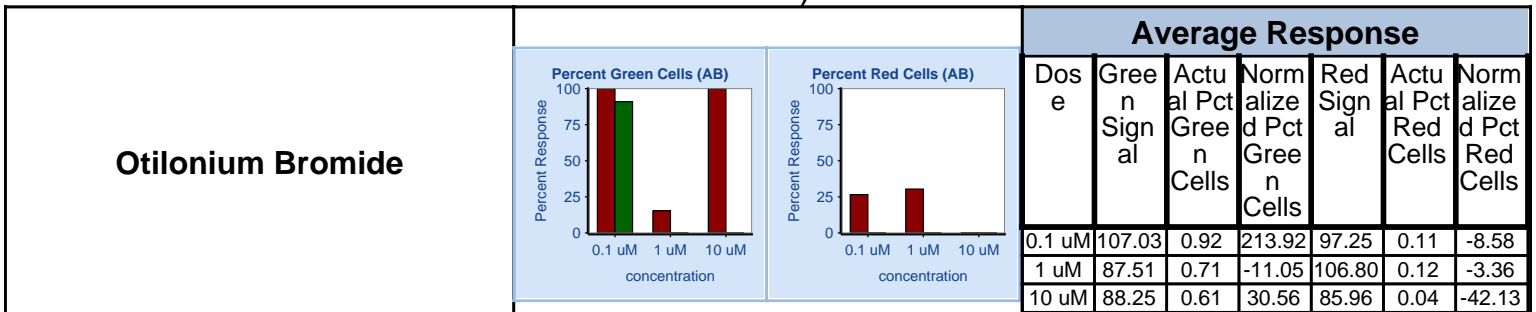

Compound

Normalized Values (A and B Sets)

Responses

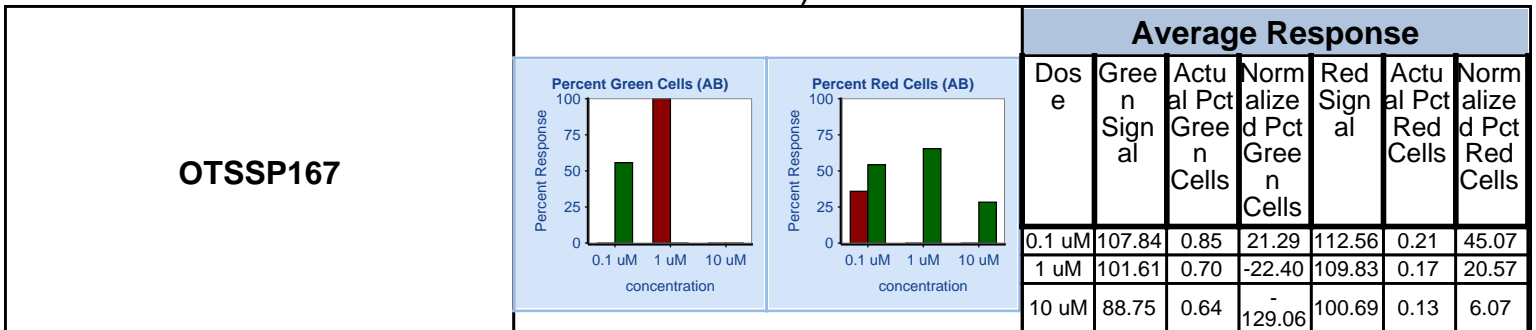

Compound

Normalized Values (A and B Sets)

Responses

| OTX015 |       |      | Average Response |              |                        |                            |            |                      |                          |
|--------|-------|------|------------------|--------------|------------------------|----------------------------|------------|----------------------|--------------------------|
|        |       |      | Dose             | Green Signal | Actual Pct Green Cells | Normalized Pct Green Cells | Red Signal | Actual Pct Red Cells | Normalized Pct Red Cells |
|        |       |      | 0.1 uM           | 100.95       | 0.79                   | 8.43                       | 91.49      | 0.08                 | -24.82                   |
|        |       |      | 1 uM             | 96.37        | 0.80                   | 275.98                     | 77.78      | 0.04                 | -29.24                   |
| 10 uM  | 95.16 | 0.75 | -50.19           | 97.77        | 0.09                   | -9.90                      |            |                      |                          |

Compound

Normalized Values (A and B Sets)

Responses

| Ouabain |       |      | Average Response |              |                        |                            |            |                      |                          |
|---------|-------|------|------------------|--------------|------------------------|----------------------------|------------|----------------------|--------------------------|
|         |       |      | Dose             | Green Signal | Actual Pct Green Cells | Normalized Pct Green Cells | Red Signal | Actual Pct Red Cells | Normalized Pct Red Cells |
|         |       |      | 0.1 uM           | 99.31        | 0.85                   | 96.26                      | 82.74      | 0.09                 | -17.31                   |
|         |       |      | 1 uM             | 92.25        | 0.74                   | 11.68                      | 86.13      | 0.08                 | -28.19                   |
| 10 uM   | 70.36 | 0.53 | 318.59           | 49.68        | 0.02                   | -55.14                     |            |                      |                          |

Compound

Normalized Values (A and B Sets)

Responses

| Oxaliplatin |        |      | Average Response |              |                        |                            |            |                      |                          |
|-------------|--------|------|------------------|--------------|------------------------|----------------------------|------------|----------------------|--------------------------|
|             |        |      | Dose             | Green Signal | Actual Pct Green Cells | Normalized Pct Green Cells | Red Signal | Actual Pct Red Cells | Normalized Pct Red Cells |
|             |        |      | 0.1 uM           | 81.34        | 0.77                   | -38.70                     | 81.02      | 0.03                 | -60.10                   |
|             |        |      | 1 uM             | 96.74        | 0.85                   | 38.70                      | 82.43      | 0.03                 | -45.41                   |
| 10 uM       | 116.49 | 0.94 | 139.16           | 96.11        | 0.05                   | -30.83                     |            |                      |                          |

Compound

Normalized Values (A and B Sets)

Responses

| Oxeladin Citrate |       |      | Average Response |              |                        |                            |            |                      |                          |
|------------------|-------|------|------------------|--------------|------------------------|----------------------------|------------|----------------------|--------------------------|
|                  |       |      | Dose             | Green Signal | Actual Pct Green Cells | Normalized Pct Green Cells | Red Signal | Actual Pct Red Cells | Normalized Pct Red Cells |
|                  |       |      | 0.1 uM           | 89.57        | 0.88                   | -71.66                     | 79.52      | 0.04                 | -44.59                   |
|                  |       |      | 1 uM             | 93.30        | 0.76                   | 25.88                      | 76.75      | 0.03                 | -54.31                   |
| 10 uM            | 94.26 | 0.83 | 81.23            | 89.73        | 0.04                   | -42.03                     |            |                      |                          |

Compound

Normalized Values (A and B Sets)

Responses

| Oxybutynin |        |      | Average Response |              |                        |                            |            |                      |                          |
|------------|--------|------|------------------|--------------|------------------------|----------------------------|------------|----------------------|--------------------------|
|            |        |      | Dose             | Green Signal | Actual Pct Green Cells | Normalized Pct Green Cells | Red Signal | Actual Pct Red Cells | Normalized Pct Red Cells |
|            |        |      | 0.1 uM           | 100.09       | 0.89                   | 76.86                      | 83.91      | 0.04                 | -54.14                   |
|            |        |      | 1 uM             | 105.97       | 0.89                   | 104.70                     | 78.65      | 0.03                 | -43.35                   |
| 10 uM      | 112.46 | 0.95 | 142.86           | 108.90       | 0.08                   | -20.21                     |            |                      |                          |

Compound

Normalized Values (A and B Sets)

Responses

| Oxymatrine | Percent Green Cells (AB) |  | Percent Red Cells (AB) |  | Average Response |              |                        |                            |            |                      |                          |
|------------|--------------------------|--|------------------------|--|------------------|--------------|------------------------|----------------------------|------------|----------------------|--------------------------|
|            | Percent Response         |  | Percent Response       |  | Dose             | Green Signal | Actual Pct Green Cells | Normalized Pct Green Cells | Red Signal | Actual Pct Red Cells | Normalized Pct Red Cells |
|            | 100                      |  | 100                    |  | 0.1 uM           | 92.44        | 0.86                   | 63.07                      | 80.59      | 0.03                 | -39.79                   |
|            | 0                        |  | 0                      |  | 1 uM             | 82.20        | 0.67                   | -11.79                     | 90.81      | 0.05                 | -34.04                   |
|            | 0.1 uM                   |  | 0.1 uM                 |  | 10 uM            | 90.21        | 0.90                   | 70.99                      | 72.10      | 0.01                 | -51.73                   |
|            | 1 uM                     |  | 1 uM                   |  |                  |              |                        |                            |            |                      |                          |
|            | 10 uM                    |  | 10 uM                  |  |                  |              |                        |                            |            |                      |                          |

Compound

Normalized Values (A and B Sets)

Responses

| Oxymetholone | Percent Green Cells (AB) |  | Percent Red Cells (AB) |  | Average Response |              |                        |                            |            |                      |                          |        |
|--------------|--------------------------|--|------------------------|--|------------------|--------------|------------------------|----------------------------|------------|----------------------|--------------------------|--------|
|              | Percent Response         |  | Percent Response       |  | Dose             | Green Signal | Actual Pct Green Cells | Normalized Pct Green Cells | Red Signal | Actual Pct Red Cells | Normalized Pct Red Cells |        |
|              | 100                      |  | 100                    |  | 0.1 uM           | 90.05        | 0.85                   | -                          | 107.80     | 81.43                | 0.06                     | -34.79 |
|              | 0                        |  | 0                      |  | 1 uM             | 86.84        | 0.70                   | -12.29                     | 80.46      | 0.03                 | -52.10                   |        |
|              | 0.1 uM                   |  | 0.1 uM                 |  | 10 uM            | 89.42        | 0.78                   | -17.71                     | 77.62      | 0.03                 | -48.19                   |        |
|              | 1 uM                     |  | 1 uM                   |  |                  |              |                        |                            |            |                      |                          |        |
|              | 10 uM                    |  | 10 uM                  |  |                  |              |                        |                            |            |                      |                          |        |

Compound

Normalized Values (A and B Sets)

Responses

| Oxytetracycline (Terramycin) | Percent Green Cells (AB) |  | Percent Red Cells (AB) |  | Average Response |              |                        |                            |            |                      |                          |
|------------------------------|--------------------------|--|------------------------|--|------------------|--------------|------------------------|----------------------------|------------|----------------------|--------------------------|
|                              | Percent Response         |  | Percent Response       |  | Dose             | Green Signal | Actual Pct Green Cells | Normalized Pct Green Cells | Red Signal | Actual Pct Red Cells | Normalized Pct Red Cells |
|                              | 100                      |  | 100                    |  | 0.1 uM           | 92.37        | 0.82                   | 9.42                       | 83.24      | 0.04                 | -50.43                   |
|                              | 0                        |  | 0                      |  | 1 uM             | 95.92        | 0.77                   | 23.33                      | 94.79      | 0.06                 | -31.45                   |
|                              | 0.1 uM                   |  | 0.1 uM                 |  | 10 uM            | 95.70        | 0.80                   | 43.17                      | 113.06     | 0.10                 | -12.44                   |
|                              | 1 uM                     |  | 1 uM                   |  |                  |              |                        |                            |            |                      |                          |
|                              | 10 uM                    |  | 10 uM                  |  |                  |              |                        |                            |            |                      |                          |

Compound

Normalized Values (A and B Sets)

Responses

| Ozagrel | Percent Green Cells (AB) |  | Percent Red Cells (AB) |  | Average Response |              |                        |                            |            |                      |                          |
|---------|--------------------------|--|------------------------|--|------------------|--------------|------------------------|----------------------------|------------|----------------------|--------------------------|
|         | Percent Response         |  | Percent Response       |  | Dose             | Green Signal | Actual Pct Green Cells | Normalized Pct Green Cells | Red Signal | Actual Pct Red Cells | Normalized Pct Red Cells |
|         | 100                      |  | 100                    |  | 0.1 uM           | 87.82        | 0.74                   | -69.24                     | 84.38      | 0.05                 | -30.06                   |
|         | 0                        |  | 0                      |  | 1 uM             | 100.24       | 0.81                   | 65.72                      | 85.35      | 0.05                 | -34.62                   |
|         | 0.1 uM                   |  | 0.1 uM                 |  | 10 uM            | 81.31        | 0.75                   | 984.62                     | 93.31      | 0.08                 | -20.01                   |
|         | 1 uM                     |  | 1 uM                   |  |                  |              |                        |                            |            |                      |                          |
|         | 10 uM                    |  | 10 uM                  |  |                  |              |                        |                            |            |                      |                          |

Compound

Normalized Values (A and B Sets)

Responses

| P276-00 | Percent Green Cells (AB) |  | Percent Red Cells (AB) |  | Average Response |              |                        |                            |            |                      |                          |
|---------|--------------------------|--|------------------------|--|------------------|--------------|------------------------|----------------------------|------------|----------------------|--------------------------|
|         | Percent Response         |  | Percent Response       |  | Dose             | Green Signal | Actual Pct Green Cells | Normalized Pct Green Cells | Red Signal | Actual Pct Red Cells | Normalized Pct Red Cells |
|         | 100                      |  | 100                    |  | 0.1 uM           | 111.07       | 0.90                   | 112.08                     | 89.55      | 0.10                 | -16.88                   |
|         | 0                        |  | 0                      |  | 1 uM             | 103.43       | 0.90                   | 135.05                     | 81.76      | 0.10                 | 10.67                    |
|         | 0.1 uM                   |  | 0.1 uM                 |  | 10 uM            | 86.50        | 0.76                   | -38.90                     | 92.67      | 0.15                 | 12.52                    |
|         | 1 uM                     |  | 1 uM                   |  |                  |              |                        |                            |            |                      |                          |
|         | 10 uM                    |  | 10 uM                  |  |                  |              |                        |                            |            |                      |                          |



Compound

Normalized Values (A and B Sets)

Responses

| P22077 | Percent Green Cells (AB) |  | Percent Red Cells (AB) |  | Average Response |              |                        |                            |            |                      |                          |
|--------|--------------------------|--|------------------------|--|------------------|--------------|------------------------|----------------------------|------------|----------------------|--------------------------|
|        | Percent Response         |  | Percent Response       |  | Dose             | Green Signal | Actual Pct Green Cells | Normalized Pct Green Cells | Red Signal | Actual Pct Red Cells | Normalized Pct Red Cells |
|        | 100                      |  | 100                    |  | 0.1 uM           | 82.07        | 0.73                   | -63.27                     | 81.09      | 0.05                 | -39.65                   |
|        | 0                        |  | 0                      |  | 1 uM             | 90.09        | 0.74                   | 17.91                      | 79.83      | 0.03                 | -49.39                   |
|        | 0.1 uM                   |  | 0.1 uM                 |  | 10 uM            | 99.04        | 0.84                   | 36.76                      | 123.89     | 0.23                 | 54.52                    |
|        | 1 uM                     |  | 1 uM                   |  |                  |              |                        |                            |            |                      |                          |
|        | 10 uM                    |  | 10 uM                  |  |                  |              |                        |                            |            |                      |                          |

Compound

Normalized Values (A and B Sets)

Responses

| PA-824 | Percent Green Cells (AB) |  | Percent Red Cells (AB) |  | Average Response |              |                        |                            |            |                      |                          |
|--------|--------------------------|--|------------------------|--|------------------|--------------|------------------------|----------------------------|------------|----------------------|--------------------------|
|        | Percent Response         |  | Percent Response       |  | Dose             | Green Signal | Actual Pct Green Cells | Normalized Pct Green Cells | Red Signal | Actual Pct Red Cells | Normalized Pct Red Cells |
|        | 100                      |  | 100                    |  | 0.1 uM           | 108.03       | 0.93                   | 130.94                     | 87.88      | 0.07                 | -31.20                   |
|        | 0                        |  | 0                      |  | 1 uM             | 98.21        | 0.82                   | 36.31                      | 95.99      | 0.09                 | -16.69                   |
|        | 0.1 uM                   |  | 0.1 uM                 |  | 10 uM            | 90.22        | 0.79                   | 39.66                      | 119.22     | 0.13                 | -0.91                    |
|        | 1 uM                     |  | 1 uM                   |  |                  |              |                        |                            |            |                      |                          |
|        | 10 uM                    |  | 10 uM                  |  |                  |              |                        |                            |            |                      |                          |

Compound

Normalized Values (A and B Sets)

Responses

| PAC-1 | Percent Green Cells (AB) |  | Percent Red Cells (AB) |  | Average Response |              |                        |                            |            |                      |                          |
|-------|--------------------------|--|------------------------|--|------------------|--------------|------------------------|----------------------------|------------|----------------------|--------------------------|
|       | Percent Response         |  | Percent Response       |  | Dose             | Green Signal | Actual Pct Green Cells | Normalized Pct Green Cells | Red Signal | Actual Pct Red Cells | Normalized Pct Red Cells |
|       | 100                      |  | 100                    |  | 0.1 uM           | 90.33        | 0.83                   | 40.80                      | 77.49      | 0.03                 | -38.93                   |
|       | 0                        |  | 0                      |  | 1 uM             | 98.72        | 0.85                   | 81.39                      | 75.45      | 0.03                 | -42.53                   |
|       | 0.1 uM                   |  | 0.1 uM                 |  | 10 uM            | 90.65        | 0.79                   | 373.09                     | 80.67      | 0.06                 | -28.37                   |
|       | 1 uM                     |  | 1 uM                   |  |                  |              |                        |                            |            |                      |                          |
|       | 10 uM                    |  | 10 uM                  |  |                  |              |                        |                            |            |                      |                          |

Compound

Normalized Values (A and B Sets)

Responses

| Pacritinib (SB1518) | Percent Green Cells (AB) |  | Percent Red Cells (AB) |  | Average Response                                                                               |              |                        |                            |            |                      |                          |
|---------------------|--------------------------|--|------------------------|--|------------------------------------------------------------------------------------------------|--------------|------------------------|----------------------------|------------|----------------------|--------------------------|
|                     | Percent Response         |  | Percent Response       |  | Dose                                                                                           | Green Signal | Actual Pct Green Cells | Normalized Pct Green Cells | Red Signal | Actual Pct Red Cells | Normalized Pct Red Cells |
|                     | 100                      |  | 100                    |  | 0.1 uM                                                                                         | 73.91        | 0.58                   | 155.49                     | 58.85      | 0.01                 | -71.30                   |
|                     | 0                        |  | 0                      |  | 1 uM                                                                                           | 98.78        | 0.93                   | 148.76                     | 65.51      | 0.02                 | -36.73                   |
|                     | 0.1 uM                   |  | 0.1 uM                 |  | 10 uM <td>98.39</td> <td>0.88</td> <td>62.05</td> <td>89.35</td> <td>0.08</td> <td>-18.26</td> | 98.39        | 0.88                   | 62.05                      | 89.35      | 0.08                 | -18.26                   |
|                     | 1 uM                     |  | 1 uM                   |  |                                                                                                |              |                        |                            |            |                      |                          |
|                     | 10 uM                    |  | 10 uM                  |  |                                                                                                |              |                        |                            |            |                      |                          |

Compound

Normalized Values (A and B Sets)

Responses

| Paeoniflorin | Percent Green Cells (AB) |  | Percent Red Cells (AB) |  | Average Response                                                                               |              |                        |                            |            |                      |                          |
|--------------|--------------------------|--|------------------------|--|------------------------------------------------------------------------------------------------|--------------|------------------------|----------------------------|------------|----------------------|--------------------------|
|              | Percent Response         |  | Percent Response       |  | Dose                                                                                           | Green Signal | Actual Pct Green Cells | Normalized Pct Green Cells | Red Signal | Actual Pct Red Cells | Normalized Pct Red Cells |
|              | 100                      |  | 100                    |  | 0.1 uM                                                                                         | 89.84        | 0.81                   | 3.99                       | 83.13      | 0.04                 | -34.36                   |
|              | 0                        |  | 0                      |  | 1 uM                                                                                           | 94.06        | 0.80                   | 50.80                      | 66.25      | 0.01                 | -51.46                   |
|              | 0.1 uM                   |  | 0.1 uM                 |  | 10 uM <td>98.79</td> <td>0.90</td> <td>62.78</td> <td>101.77</td> <td>0.11</td> <td>-5.48</td> | 98.79        | 0.90                   | 62.78                      | 101.77     | 0.11                 | -5.48                    |
|              | 1 uM                     |  | 1 uM                   |  |                                                                                                |              |                        |                            |            |                      |                          |
|              | 10 uM                    |  | 10 uM                  |  |                                                                                                |              |                        |                            |            |                      |                          |

| Compound                            | Normalized Values (A and B Sets) | Responses                                                                                                                                                                                                                                                                                                                                                                                                                                                                                                                                                                                                                                                                       |                  |                        |                            |            |                      |                          |  |      |              |                        |                            |            |                      |                          |        |       |      |       |       |      |        |      |       |      |        |       |      |        |       |       |      |       |       |      |        |
|-------------------------------------|----------------------------------|---------------------------------------------------------------------------------------------------------------------------------------------------------------------------------------------------------------------------------------------------------------------------------------------------------------------------------------------------------------------------------------------------------------------------------------------------------------------------------------------------------------------------------------------------------------------------------------------------------------------------------------------------------------------------------|------------------|------------------------|----------------------------|------------|----------------------|--------------------------|--|------|--------------|------------------------|----------------------------|------------|----------------------|--------------------------|--------|-------|------|-------|-------|------|--------|------|-------|------|--------|-------|------|--------|-------|-------|------|-------|-------|------|--------|
| <b>Palbociclib (PD-0332991) HCl</b> |                                  | <table border="1"> <thead> <tr> <th colspan="7">Average Response</th> </tr> <tr> <th>Dose</th> <th>Green Signal</th> <th>Actual Pct Green Cells</th> <th>Normalized Pct Green Cells</th> <th>Red Signal</th> <th>Actual Pct Red Cells</th> <th>Normalized Pct Red Cells</th> </tr> </thead> <tbody> <tr> <td>0.1 uM</td> <td>88.40</td> <td>0.85</td> <td>61.36</td> <td>76.68</td> <td>0.02</td> <td>-63.55</td> </tr> <tr> <td>1 uM</td> <td>83.76</td> <td>0.66</td> <td>-48.22</td> <td>78.66</td> <td>0.04</td> <td>-39.31</td> </tr> <tr> <td>10 uM</td> <td>81.90</td> <td>0.76</td> <td>28.69</td> <td>95.62</td> <td>0.03</td> <td>-41.41</td> </tr> </tbody> </table> | Average Response |                        |                            |            |                      |                          |  | Dose | Green Signal | Actual Pct Green Cells | Normalized Pct Green Cells | Red Signal | Actual Pct Red Cells | Normalized Pct Red Cells | 0.1 uM | 88.40 | 0.85 | 61.36 | 76.68 | 0.02 | -63.55 | 1 uM | 83.76 | 0.66 | -48.22 | 78.66 | 0.04 | -39.31 | 10 uM | 81.90 | 0.76 | 28.69 | 95.62 | 0.03 | -41.41 |
|                                     |                                  | Average Response                                                                                                                                                                                                                                                                                                                                                                                                                                                                                                                                                                                                                                                                |                  |                        |                            |            |                      |                          |  |      |              |                        |                            |            |                      |                          |        |       |      |       |       |      |        |      |       |      |        |       |      |        |       |       |      |       |       |      |        |
|                                     |                                  | Dose                                                                                                                                                                                                                                                                                                                                                                                                                                                                                                                                                                                                                                                                            | Green Signal     | Actual Pct Green Cells | Normalized Pct Green Cells | Red Signal | Actual Pct Red Cells | Normalized Pct Red Cells |  |      |              |                        |                            |            |                      |                          |        |       |      |       |       |      |        |      |       |      |        |       |      |        |       |       |      |       |       |      |        |
|                                     |                                  | 0.1 uM                                                                                                                                                                                                                                                                                                                                                                                                                                                                                                                                                                                                                                                                          | 88.40            | 0.85                   | 61.36                      | 76.68      | 0.02                 | -63.55                   |  |      |              |                        |                            |            |                      |                          |        |       |      |       |       |      |        |      |       |      |        |       |      |        |       |       |      |       |       |      |        |
| 1 uM                                | 83.76                            | 0.66                                                                                                                                                                                                                                                                                                                                                                                                                                                                                                                                                                                                                                                                            | -48.22           | 78.66                  | 0.04                       | -39.31     |                      |                          |  |      |              |                        |                            |            |                      |                          |        |       |      |       |       |      |        |      |       |      |        |       |      |        |       |       |      |       |       |      |        |
| 10 uM                               | 81.90                            | 0.76                                                                                                                                                                                                                                                                                                                                                                                                                                                                                                                                                                                                                                                                            | 28.69            | 95.62                  | 0.03                       | -41.41     |                      |                          |  |      |              |                        |                            |            |                      |                          |        |       |      |       |       |      |        |      |       |      |        |       |      |        |       |       |      |       |       |      |        |

| Compound                  | Normalized Values (A and B Sets) | Responses                                                                                                                                                                                                                                                                                                                                                                                                                                                                                                                                                                                                                                                                           |                  |                        |                            |            |                      |                          |  |      |              |                        |                            |            |                      |                          |        |       |      |        |       |      |        |      |        |      |        |       |      |        |       |        |      |        |       |      |        |
|---------------------------|----------------------------------|-------------------------------------------------------------------------------------------------------------------------------------------------------------------------------------------------------------------------------------------------------------------------------------------------------------------------------------------------------------------------------------------------------------------------------------------------------------------------------------------------------------------------------------------------------------------------------------------------------------------------------------------------------------------------------------|------------------|------------------------|----------------------------|------------|----------------------|--------------------------|--|------|--------------|------------------------|----------------------------|------------|----------------------|--------------------------|--------|-------|------|--------|-------|------|--------|------|--------|------|--------|-------|------|--------|-------|--------|------|--------|-------|------|--------|
| <b>Palomid 529 (P529)</b> |                                  | <table border="1"> <thead> <tr> <th colspan="7">Average Response</th> </tr> <tr> <th>Dose</th> <th>Green Signal</th> <th>Actual Pct Green Cells</th> <th>Normalized Pct Green Cells</th> <th>Red Signal</th> <th>Actual Pct Red Cells</th> <th>Normalized Pct Red Cells</th> </tr> </thead> <tbody> <tr> <td>0.1 uM</td> <td>98.58</td> <td>0.92</td> <td>127.47</td> <td>92.60</td> <td>0.08</td> <td>-13.80</td> </tr> <tr> <td>1 uM</td> <td>107.26</td> <td>0.89</td> <td>101.84</td> <td>80.30</td> <td>0.04</td> <td>-39.37</td> </tr> <tr> <td>10 uM</td> <td>101.51</td> <td>0.93</td> <td>354.84</td> <td>71.44</td> <td>0.03</td> <td>-46.52</td> </tr> </tbody> </table> | Average Response |                        |                            |            |                      |                          |  | Dose | Green Signal | Actual Pct Green Cells | Normalized Pct Green Cells | Red Signal | Actual Pct Red Cells | Normalized Pct Red Cells | 0.1 uM | 98.58 | 0.92 | 127.47 | 92.60 | 0.08 | -13.80 | 1 uM | 107.26 | 0.89 | 101.84 | 80.30 | 0.04 | -39.37 | 10 uM | 101.51 | 0.93 | 354.84 | 71.44 | 0.03 | -46.52 |
|                           |                                  | Average Response                                                                                                                                                                                                                                                                                                                                                                                                                                                                                                                                                                                                                                                                    |                  |                        |                            |            |                      |                          |  |      |              |                        |                            |            |                      |                          |        |       |      |        |       |      |        |      |        |      |        |       |      |        |       |        |      |        |       |      |        |
|                           |                                  | Dose                                                                                                                                                                                                                                                                                                                                                                                                                                                                                                                                                                                                                                                                                | Green Signal     | Actual Pct Green Cells | Normalized Pct Green Cells | Red Signal | Actual Pct Red Cells | Normalized Pct Red Cells |  |      |              |                        |                            |            |                      |                          |        |       |      |        |       |      |        |      |        |      |        |       |      |        |       |        |      |        |       |      |        |
|                           |                                  | 0.1 uM                                                                                                                                                                                                                                                                                                                                                                                                                                                                                                                                                                                                                                                                              | 98.58            | 0.92                   | 127.47                     | 92.60      | 0.08                 | -13.80                   |  |      |              |                        |                            |            |                      |                          |        |       |      |        |       |      |        |      |        |      |        |       |      |        |       |        |      |        |       |      |        |
| 1 uM                      | 107.26                           | 0.89                                                                                                                                                                                                                                                                                                                                                                                                                                                                                                                                                                                                                                                                                | 101.84           | 80.30                  | 0.04                       | -39.37     |                      |                          |  |      |              |                        |                            |            |                      |                          |        |       |      |        |       |      |        |      |        |      |        |       |      |        |       |        |      |        |       |      |        |
| 10 uM                     | 101.51                           | 0.93                                                                                                                                                                                                                                                                                                                                                                                                                                                                                                                                                                                                                                                                                | 354.84           | 71.44                  | 0.03                       | -46.52     |                      |                          |  |      |              |                        |                            |            |                      |                          |        |       |      |        |       |      |        |      |        |      |        |       |      |        |       |        |      |        |       |      |        |

| Compound                     | Normalized Values (A and B Sets) | Responses                                                                                                                                                                                                                                                                                                                                                                                                                                                                                                                                                                                                                                                                             |                  |                        |                            |            |                      |                          |  |      |              |                        |                            |            |                      |                          |        |       |      |        |        |      |        |      |        |      |        |        |      |        |       |        |      |        |        |      |       |
|------------------------------|----------------------------------|---------------------------------------------------------------------------------------------------------------------------------------------------------------------------------------------------------------------------------------------------------------------------------------------------------------------------------------------------------------------------------------------------------------------------------------------------------------------------------------------------------------------------------------------------------------------------------------------------------------------------------------------------------------------------------------|------------------|------------------------|----------------------------|------------|----------------------|--------------------------|--|------|--------------|------------------------|----------------------------|------------|----------------------|--------------------------|--------|-------|------|--------|--------|------|--------|------|--------|------|--------|--------|------|--------|-------|--------|------|--------|--------|------|-------|
| <b>Panobinostat (LBH589)</b> |                                  | <table border="1"> <thead> <tr> <th colspan="7">Average Response</th> </tr> <tr> <th>Dose</th> <th>Green Signal</th> <th>Actual Pct Green Cells</th> <th>Normalized Pct Green Cells</th> <th>Red Signal</th> <th>Actual Pct Red Cells</th> <th>Normalized Pct Red Cells</th> </tr> </thead> <tbody> <tr> <td>0.1 uM</td> <td>92.95</td> <td>0.68</td> <td>125.20</td> <td>103.99</td> <td>0.11</td> <td>-13.47</td> </tr> <tr> <td>1 uM</td> <td>107.96</td> <td>0.95</td> <td>163.52</td> <td>120.78</td> <td>0.08</td> <td>-22.38</td> </tr> <tr> <td>10 uM</td> <td>105.84</td> <td>0.92</td> <td>129.28</td> <td>130.82</td> <td>0.16</td> <td>10.22</td> </tr> </tbody> </table> | Average Response |                        |                            |            |                      |                          |  | Dose | Green Signal | Actual Pct Green Cells | Normalized Pct Green Cells | Red Signal | Actual Pct Red Cells | Normalized Pct Red Cells | 0.1 uM | 92.95 | 0.68 | 125.20 | 103.99 | 0.11 | -13.47 | 1 uM | 107.96 | 0.95 | 163.52 | 120.78 | 0.08 | -22.38 | 10 uM | 105.84 | 0.92 | 129.28 | 130.82 | 0.16 | 10.22 |
|                              |                                  | Average Response                                                                                                                                                                                                                                                                                                                                                                                                                                                                                                                                                                                                                                                                      |                  |                        |                            |            |                      |                          |  |      |              |                        |                            |            |                      |                          |        |       |      |        |        |      |        |      |        |      |        |        |      |        |       |        |      |        |        |      |       |
|                              |                                  | Dose                                                                                                                                                                                                                                                                                                                                                                                                                                                                                                                                                                                                                                                                                  | Green Signal     | Actual Pct Green Cells | Normalized Pct Green Cells | Red Signal | Actual Pct Red Cells | Normalized Pct Red Cells |  |      |              |                        |                            |            |                      |                          |        |       |      |        |        |      |        |      |        |      |        |        |      |        |       |        |      |        |        |      |       |
|                              |                                  | 0.1 uM                                                                                                                                                                                                                                                                                                                                                                                                                                                                                                                                                                                                                                                                                | 92.95            | 0.68                   | 125.20                     | 103.99     | 0.11                 | -13.47                   |  |      |              |                        |                            |            |                      |                          |        |       |      |        |        |      |        |      |        |      |        |        |      |        |       |        |      |        |        |      |       |
| 1 uM                         | 107.96                           | 0.95                                                                                                                                                                                                                                                                                                                                                                                                                                                                                                                                                                                                                                                                                  | 163.52           | 120.78                 | 0.08                       | -22.38     |                      |                          |  |      |              |                        |                            |            |                      |                          |        |       |      |        |        |      |        |      |        |      |        |        |      |        |       |        |      |        |        |      |       |
| 10 uM                        | 105.84                           | 0.92                                                                                                                                                                                                                                                                                                                                                                                                                                                                                                                                                                                                                                                                                  | 129.28           | 130.82                 | 0.16                       | 10.22      |                      |                          |  |      |              |                        |                            |            |                      |                          |        |       |      |        |        |      |        |      |        |      |        |        |      |        |       |        |      |        |        |      |       |

| Compound          | Normalized Values (A and B Sets) | Responses                                                                                                                                                                                                                                                                                                                                                                                                                                                                                                                                                                                                                                                                       |                  |                        |                            |            |                      |                          |  |      |              |                        |                            |            |                      |                          |        |        |      |        |       |      |        |      |       |      |       |       |      |       |       |        |      |        |       |      |      |
|-------------------|----------------------------------|---------------------------------------------------------------------------------------------------------------------------------------------------------------------------------------------------------------------------------------------------------------------------------------------------------------------------------------------------------------------------------------------------------------------------------------------------------------------------------------------------------------------------------------------------------------------------------------------------------------------------------------------------------------------------------|------------------|------------------------|----------------------------|------------|----------------------|--------------------------|--|------|--------------|------------------------|----------------------------|------------|----------------------|--------------------------|--------|--------|------|--------|-------|------|--------|------|-------|------|-------|-------|------|-------|-------|--------|------|--------|-------|------|------|
| <b>Pasiniazid</b> |                                  | <table border="1"> <thead> <tr> <th colspan="7">Average Response</th> </tr> <tr> <th>Dose</th> <th>Green Signal</th> <th>Actual Pct Green Cells</th> <th>Normalized Pct Green Cells</th> <th>Red Signal</th> <th>Actual Pct Red Cells</th> <th>Normalized Pct Red Cells</th> </tr> </thead> <tbody> <tr> <td>0.1 uM</td> <td>116.49</td> <td>0.98</td> <td>269.97</td> <td>98.19</td> <td>0.10</td> <td>-13.43</td> </tr> <tr> <td>1 uM</td> <td>99.18</td> <td>0.80</td> <td>59.10</td> <td>95.61</td> <td>0.12</td> <td>-8.52</td> </tr> <tr> <td>10 uM</td> <td>112.54</td> <td>0.92</td> <td>163.64</td> <td>97.11</td> <td>0.12</td> <td>0.03</td> </tr> </tbody> </table> | Average Response |                        |                            |            |                      |                          |  | Dose | Green Signal | Actual Pct Green Cells | Normalized Pct Green Cells | Red Signal | Actual Pct Red Cells | Normalized Pct Red Cells | 0.1 uM | 116.49 | 0.98 | 269.97 | 98.19 | 0.10 | -13.43 | 1 uM | 99.18 | 0.80 | 59.10 | 95.61 | 0.12 | -8.52 | 10 uM | 112.54 | 0.92 | 163.64 | 97.11 | 0.12 | 0.03 |
|                   |                                  | Average Response                                                                                                                                                                                                                                                                                                                                                                                                                                                                                                                                                                                                                                                                |                  |                        |                            |            |                      |                          |  |      |              |                        |                            |            |                      |                          |        |        |      |        |       |      |        |      |       |      |       |       |      |       |       |        |      |        |       |      |      |
|                   |                                  | Dose                                                                                                                                                                                                                                                                                                                                                                                                                                                                                                                                                                                                                                                                            | Green Signal     | Actual Pct Green Cells | Normalized Pct Green Cells | Red Signal | Actual Pct Red Cells | Normalized Pct Red Cells |  |      |              |                        |                            |            |                      |                          |        |        |      |        |       |      |        |      |       |      |       |       |      |       |       |        |      |        |       |      |      |
|                   |                                  | 0.1 uM                                                                                                                                                                                                                                                                                                                                                                                                                                                                                                                                                                                                                                                                          | 116.49           | 0.98                   | 269.97                     | 98.19      | 0.10                 | -13.43                   |  |      |              |                        |                            |            |                      |                          |        |        |      |        |       |      |        |      |       |      |       |       |      |       |       |        |      |        |       |      |      |
| 1 uM              | 99.18                            | 0.80                                                                                                                                                                                                                                                                                                                                                                                                                                                                                                                                                                                                                                                                            | 59.10            | 95.61                  | 0.12                       | -8.52      |                      |                          |  |      |              |                        |                            |            |                      |                          |        |        |      |        |       |      |        |      |       |      |       |       |      |       |       |        |      |        |       |      |      |
| 10 uM             | 112.54                           | 0.92                                                                                                                                                                                                                                                                                                                                                                                                                                                                                                                                                                                                                                                                            | 163.64           | 97.11                  | 0.12                       | 0.03       |                      |                          |  |      |              |                        |                            |            |                      |                          |        |        |      |        |       |      |        |      |       |      |       |       |      |       |       |        |      |        |       |      |      |

| Compound                     | Normalized Values (A and B Sets) | Responses                                                                                                                                                                                                                                                                                                                                                                                                                                                                                                                                                       |                  |                        |                            |            |                      |                          |  |      |              |                        |                            |            |                      |                          |        |        |      |        |        |      |       |      |       |      |         |       |      |        |
|------------------------------|----------------------------------|-----------------------------------------------------------------------------------------------------------------------------------------------------------------------------------------------------------------------------------------------------------------------------------------------------------------------------------------------------------------------------------------------------------------------------------------------------------------------------------------------------------------------------------------------------------------|------------------|------------------------|----------------------------|------------|----------------------|--------------------------|--|------|--------------|------------------------|----------------------------|------------|----------------------|--------------------------|--------|--------|------|--------|--------|------|-------|------|-------|------|---------|-------|------|--------|
| <b>PB 28 dihydrochloride</b> |                                  | <table border="1"> <thead> <tr> <th colspan="7">Average Response</th> </tr> <tr> <th>Dose</th> <th>Green Signal</th> <th>Actual Pct Green Cells</th> <th>Normalized Pct Green Cells</th> <th>Red Signal</th> <th>Actual Pct Red Cells</th> <th>Normalized Pct Red Cells</th> </tr> </thead> <tbody> <tr> <td>0.1 uM</td> <td>105.35</td> <td>0.90</td> <td>104.85</td> <td>103.68</td> <td>0.16</td> <td>19.11</td> </tr> <tr> <td>1 uM</td> <td>74.41</td> <td>0.59</td> <td>2017.62</td> <td>76.57</td> <td>0.02</td> <td>-37.05</td> </tr> </tbody> </table> | Average Response |                        |                            |            |                      |                          |  | Dose | Green Signal | Actual Pct Green Cells | Normalized Pct Green Cells | Red Signal | Actual Pct Red Cells | Normalized Pct Red Cells | 0.1 uM | 105.35 | 0.90 | 104.85 | 103.68 | 0.16 | 19.11 | 1 uM | 74.41 | 0.59 | 2017.62 | 76.57 | 0.02 | -37.05 |
|                              |                                  | Average Response                                                                                                                                                                                                                                                                                                                                                                                                                                                                                                                                                |                  |                        |                            |            |                      |                          |  |      |              |                        |                            |            |                      |                          |        |        |      |        |        |      |       |      |       |      |         |       |      |        |
|                              |                                  | Dose                                                                                                                                                                                                                                                                                                                                                                                                                                                                                                                                                            | Green Signal     | Actual Pct Green Cells | Normalized Pct Green Cells | Red Signal | Actual Pct Red Cells | Normalized Pct Red Cells |  |      |              |                        |                            |            |                      |                          |        |        |      |        |        |      |       |      |       |      |         |       |      |        |
| 0.1 uM                       | 105.35                           | 0.90                                                                                                                                                                                                                                                                                                                                                                                                                                                                                                                                                            | 104.85           | 103.68                 | 0.16                       | 19.11      |                      |                          |  |      |              |                        |                            |            |                      |                          |        |        |      |        |        |      |       |      |       |      |         |       |      |        |
| 1 uM                         | 74.41                            | 0.59                                                                                                                                                                                                                                                                                                                                                                                                                                                                                                                                                            | 2017.62          | 76.57                  | 0.02                       | -37.05     |                      |                          |  |      |              |                        |                            |            |                      |                          |        |        |      |        |        |      |       |      |       |      |         |       |      |        |



Compound

Normalized Values (A and B Sets)

Responses

|  |  |        |        |                        |                            |        |      |                          |
|--|--|--------|--------|------------------------|----------------------------|--------|------|--------------------------|
|  |  |        |        | Actual Pct Green Cells | Normalized Pct Green Cells |        |      | Normalized Pct Red Cells |
|  |  | 0.1 uM | 101.82 | 0.89                   | 177.34                     | 91.62  | 0.09 | -16.63                   |
|  |  | 1 uM   | 103.38 | 0.89                   | 122.05                     | 81.81  | 0.05 | -41.53                   |
|  |  | 10 uM  | 90.05  | 0.72                   | 141.07                     | 126.13 | 0.22 | 55.99                    |

Compound

Normalized Values (A and B Sets)

Responses

|                 |        |                         |              |                        |                            |            |                      |                          |
|-----------------|--------|-------------------------|--------------|------------------------|----------------------------|------------|----------------------|--------------------------|
| <b>PD173074</b> |        | <b>Average Response</b> |              |                        |                            |            |                      |                          |
|                 |        | Dose                    | Green Signal | Actual Pct Green Cells | Normalized Pct Green Cells | Red Signal | Actual Pct Red Cells | Normalized Pct Red Cells |
|                 |        | 0.1 uM                  | 98.63        | 0.89                   | 79.99                      | 109.28     | 0.10                 | -23.00                   |
|                 |        | 1 uM                    | 80.55        | 0.67                   | -57.03                     | 82.34      | 0.02                 | -46.51                   |
| 10 uM           | 107.98 | 0.93                    | 134.47       | 102.01                 | 0.04                       | -36.53     |                      |                          |

Compound

Normalized Values (A and B Sets)

Responses

|                 |       |                         |              |                        |                            |            |                      |                          |
|-----------------|-------|-------------------------|--------------|------------------------|----------------------------|------------|----------------------|--------------------------|
| <b>PD318088</b> |       | <b>Average Response</b> |              |                        |                            |            |                      |                          |
|                 |       | Dose                    | Green Signal | Actual Pct Green Cells | Normalized Pct Green Cells | Red Signal | Actual Pct Red Cells | Normalized Pct Red Cells |
|                 |       | 0.1 uM                  | 98.31        | 0.84                   | 92.92                      | 92.54      | 0.06                 | -42.17                   |
|                 |       | 1 uM                    | 98.35        | 0.81                   | -68.40                     | 131.62     | 0.22                 | 43.81                    |
| 10 uM           | 98.56 | 0.78                    | 26.23        | 122.45                 | 0.16                       | 9.16       |                      |                          |

Compound

Normalized Values (A and B Sets)

Responses

|                                      |        |                         |              |                        |                            |            |                      |                          |
|--------------------------------------|--------|-------------------------|--------------|------------------------|----------------------------|------------|----------------------|--------------------------|
| <b>Pefloxacin Mesylate Dihydrate</b> |        | <b>Average Response</b> |              |                        |                            |            |                      |                          |
|                                      |        | Dose                    | Green Signal | Actual Pct Green Cells | Normalized Pct Green Cells | Red Signal | Actual Pct Red Cells | Normalized Pct Red Cells |
|                                      |        | 0.1 uM                  | 100.84       | 0.91                   | 107.88                     | 106.10     | 0.16                 | 16.28                    |
|                                      |        | 1 uM                    | 71.26        | 0.49                   | 179.13                     | 83.15      | 0.07                 | -29.08                   |
| 10 uM                                | 103.07 | 0.89                    | 135.50       | 95.17                  | 0.12                       | -3.16      |                      |                          |

Compound

Normalized Values (A and B Sets)

Responses

|                            |        |                         |              |                        |                            |            |                      |                          |
|----------------------------|--------|-------------------------|--------------|------------------------|----------------------------|------------|----------------------|--------------------------|
| <b>Pelitinib (EKB-569)</b> |        | <b>Average Response</b> |              |                        |                            |            |                      |                          |
|                            |        | Dose                    | Green Signal | Actual Pct Green Cells | Normalized Pct Green Cells | Red Signal | Actual Pct Red Cells | Normalized Pct Red Cells |
|                            |        | 0.1 uM                  | 99.65        | 0.87                   | 76.70                      | 85.97      | 0.04                 | -51.21                   |
|                            |        | 1 uM                    | 114.14       | 0.95                   | 141.66                     | 132.89     | 0.20                 | 37.20                    |
| 10 uM                      | 105.95 | 0.81                    | 61.66        | 85.13                  | 0.02                       | -44.90     |                      |                          |

Compound

Normalized Values (A and B Sets)

Responses

| Penciclovir | Percent Green Cells (AB) |    | Percent Red Cells (AB) |       | Average Response |              |                        |                            |            |                      |                          |
|-------------|--------------------------|----|------------------------|-------|------------------|--------------|------------------------|----------------------------|------------|----------------------|--------------------------|
|             | Percent Response         |    | Percent Response       |       | Dose             | Green Signal | Actual Pct Green Cells | Normalized Pct Green Cells | Red Signal | Actual Pct Red Cells | Normalized Pct Red Cells |
|             | 100                      | 75 | 0                      | 25    | 0.1 uM           | 105.50       | 0.91                   | 119.52                     | 89.19      | 0.04                 | -50.67                   |
|             | 0                        | 0  | 0                      | 0     | 1 uM             | 90.74        | 0.82                   | 176.71                     | 79.46      | 0.04                 | -29.36                   |
| 0           | 0                        | 0  | 0                      | 10 uM | 104.44           | 0.89         | 78.86                  | 102.15                     | 0.13       | 6.83                 |                          |

Compound

Normalized Values (A and B Sets)

Responses

| Penfluridol | Percent Green Cells (AB) |     | Percent Red Cells (AB) |       | Average Response |              |                        |                            |            |                      |                          |
|-------------|--------------------------|-----|------------------------|-------|------------------|--------------|------------------------|----------------------------|------------|----------------------|--------------------------|
|             | Percent Response         |     | Percent Response       |       | Dose             | Green Signal | Actual Pct Green Cells | Normalized Pct Green Cells | Red Signal | Actual Pct Red Cells | Normalized Pct Red Cells |
|             | 100                      | 100 | 0                      | 0     | 0.1 uM           | 102.33       | 0.93                   | 132.62                     | 69.92      | 0.02                 | -53.76                   |
|             | 0                        | 0   | 0                      | 0     | 1 uM             | 108.93       | 0.85                   | 96.28                      | 109.37     | 0.17                 | 17.83                    |
| 0           | 0                        | 0   | 0                      | 10 uM | 88.96            | 0.86         | 137.89                 | 76.86                      | 0.00       | -64.01               |                          |

Compound

Normalized Values (A and B Sets)

Responses

| Pentamidine | Percent Green Cells (AB) |   | Percent Red Cells (AB) |       | Average Response |              |                        |                            |            |                      |                          |
|-------------|--------------------------|---|------------------------|-------|------------------|--------------|------------------------|----------------------------|------------|----------------------|--------------------------|
|             | Percent Response         |   | Percent Response       |       | Dose             | Green Signal | Actual Pct Green Cells | Normalized Pct Green Cells | Red Signal | Actual Pct Red Cells | Normalized Pct Red Cells |
|             | 0                        | 0 | 0                      | 0     | 0.1 uM           | 84.07        | 0.79                   | -93.76                     | 65.18      | 0.05                 | -39.90                   |
|             | 0                        | 0 | 0                      | 0     | 1 uM             | 86.01        | 0.74                   | 10.00                      | 73.19      | 0.02                 | -56.90                   |
| 0           | 0                        | 0 | 0                      | 10 uM | 88.12            | 0.77         | -0.96                  | 75.20                      | 0.04       | -42.63               |                          |

Compound

Normalized Values (A and B Sets)

Responses

| Pentostatin | Percent Green Cells (AB) |     | Percent Red Cells (AB) |       | Average Response |              |                        |                            |            |                      |                          |
|-------------|--------------------------|-----|------------------------|-------|------------------|--------------|------------------------|----------------------------|------------|----------------------|--------------------------|
|             | Percent Response         |     | Percent Response       |       | Dose             | Green Signal | Actual Pct Green Cells | Normalized Pct Green Cells | Red Signal | Actual Pct Red Cells | Normalized Pct Red Cells |
|             | 100                      | 100 | 0                      | 0     | 0.1 uM           | 110.34       | 0.93                   | 132.82                     | 95.40      | 0.12                 | -0.54                    |
|             | 0                        | 0   | 0                      | 0     | 1 uM             | 89.60        | 0.83                   | -69.40                     | 74.55      | 0.03                 | -33.44                   |
| 0           | 0                        | 0   | 0                      | 10 uM | 77.39            | 0.75         | -61.31                 | 75.32                      | 0.03       | -37.58               |                          |

Compound

Normalized Values (A and B Sets)

Responses

| PF 477736 | Percent Green Cells (AB) |     | Percent Red Cells (AB) |       | Average Response |              |                        |                            |            |                      |                          |
|-----------|--------------------------|-----|------------------------|-------|------------------|--------------|------------------------|----------------------------|------------|----------------------|--------------------------|
|           | Percent Response         |     | Percent Response       |       | Dose             | Green Signal | Actual Pct Green Cells | Normalized Pct Green Cells | Red Signal | Actual Pct Red Cells | Normalized Pct Red Cells |
|           | 100                      | 100 | 0                      | 0     | 0.1 uM           | 100.08       | 0.92                   | 121.30                     | 101.06     | 0.07                 | -31.70                   |
|           | 0                        | 0   | 0                      | 0     | 1 uM             | 77.93        | 0.71                   | 467.13                     | 84.81      | 0.04                 | -31.66                   |
| 0         | 0                        | 0   | 0                      | 10 uM | 103.24           | 0.89         | 73.65                  | 97.46                      | 0.13       | 8.07                 |                          |

Compound

Normalized Values (A and B Sets)

Responses

| PF-543 | Percent Green Cells (AB) |      | Percent Red Cells (AB) |        | Average Response |              |                        |                            |            |                      |                          |       |       |
|--------|--------------------------|------|------------------------|--------|------------------|--------------|------------------------|----------------------------|------------|----------------------|--------------------------|-------|-------|
|        | Percent Response         |      | Percent Response       |        | Dose             | Green Signal | Actual Pct Green Cells | Normalized Pct Green Cells | Red Signal | Actual Pct Red Cells | Normalized Pct Red Cells |       |       |
|        | concentration            |      | concentration          |        | 0.1 uM           | 1 uM         | 10 uM                  | 0.1 uM                     | 1 uM       | 10 uM                | 0.1 uM                   | 1 uM  | 10 uM |
|        | 0.1 uM                   | 1 uM | 10 uM                  | 0.1 uM | 1 uM             | 10 uM        | 0.1 uM                 | 1 uM                       | 10 uM      | 0.1 uM               | 1 uM                     | 10 uM |       |
|        | 58                       | 2    | 100                    | 75     | 0.1 uM           | 90.50        | 0.84                   | -49.74                     | 96.45      | 0.10                 | -13.77                   |       |       |
|        |                          |      |                        |        | 1 uM             | 77.12        | 0.57                   | -                          | 77.34      | 0.03                 | -51.04                   |       |       |
|        |                          |      |                        |        | 10 uM            | 100.47       | 0.87                   | 117.04                     | 113.27     | 0.18                 | 27.95                    |       |       |

Compound

Normalized Values (A and B Sets)

Responses

| PF-3845 | Percent Green Cells (AB) |      | Percent Red Cells (AB) |        | Average Response |              |                        |                            |            |                      |                          |       |       |
|---------|--------------------------|------|------------------------|--------|------------------|--------------|------------------------|----------------------------|------------|----------------------|--------------------------|-------|-------|
|         | Percent Response         |      | Percent Response       |        | Dose             | Green Signal | Actual Pct Green Cells | Normalized Pct Green Cells | Red Signal | Actual Pct Red Cells | Normalized Pct Red Cells |       |       |
|         | concentration            |      | concentration          |        | 0.1 uM           | 1 uM         | 10 uM                  | 0.1 uM                     | 1 uM       | 10 uM                | 0.1 uM                   | 1 uM  | 10 uM |
|         | 0.1 uM                   | 1 uM | 10 uM                  | 0.1 uM | 1 uM             | 10 uM        | 0.1 uM                 | 1 uM                       | 10 uM      | 0.1 uM               | 1 uM                     | 10 uM |       |
|         | 75                       | 100  | 60                     | 35     | 0.1 uM           | 96.66        | 0.89                   | 93.38                      | 92.74      | 0.07                 | -21.18                   |       |       |
|         |                          |      |                        |        | 1 uM             | 93.78        | 0.80                   | 50.19                      | 86.90      | 0.05                 | -33.53                   |       |       |
|         |                          |      |                        |        | 10 uM            | 100.63       | 0.91                   | 182.03                     | 114.85     | 0.14                 | 9.44                     |       |       |

Compound

Normalized Values (A and B Sets)

Responses

| PF-477736 | Percent Green Cells (AB) |      | Percent Red Cells (AB) |        | Average Response |              |                        |                            |            |                      |                          |       |       |
|-----------|--------------------------|------|------------------------|--------|------------------|--------------|------------------------|----------------------------|------------|----------------------|--------------------------|-------|-------|
|           | Percent Response         |      | Percent Response       |        | Dose             | Green Signal | Actual Pct Green Cells | Normalized Pct Green Cells | Red Signal | Actual Pct Red Cells | Normalized Pct Red Cells |       |       |
|           | concentration            |      | concentration          |        | 0.1 uM           | 1 uM         | 10 uM                  | 0.1 uM                     | 1 uM       | 10 uM                | 0.1 uM                   | 1 uM  | 10 uM |
|           | 0.1 uM                   | 1 uM | 10 uM                  | 0.1 uM | 1 uM             | 10 uM        | 0.1 uM                 | 1 uM                       | 10 uM      | 0.1 uM               | 1 uM                     | 10 uM |       |
|           | 100                      | 100  | 100                    | 100    | 0.1 uM           | 102.32       | 0.94                   | 227.44                     | 60.97      | 0.01                 | -58.88                   |       |       |
|           |                          |      |                        |        | 1 uM             | 81.95        | 0.69                   | -21.43                     | 69.40      | 0.01                 | -61.99                   |       |       |
|           |                          |      |                        |        | 10 uM            | 115.34       | 0.92                   | 146.96                     | 97.38      | 0.07                 | -27.70                   |       |       |

Compound

Normalized Values (A and B Sets)

Responses

| PF-00562271 | Percent Green Cells (AB) |      | Percent Red Cells (AB) |        | Average Response |              |                        |                            |            |                      |                          |       |       |
|-------------|--------------------------|------|------------------------|--------|------------------|--------------|------------------------|----------------------------|------------|----------------------|--------------------------|-------|-------|
|             | Percent Response         |      | Percent Response       |        | Dose             | Green Signal | Actual Pct Green Cells | Normalized Pct Green Cells | Red Signal | Actual Pct Red Cells | Normalized Pct Red Cells |       |       |
|             | concentration            |      | concentration          |        | 0.1 uM           | 1 uM         | 10 uM                  | 0.1 uM                     | 1 uM       | 10 uM                | 0.1 uM                   | 1 uM  | 10 uM |
|             | 0.1 uM                   | 1 uM | 10 uM                  | 0.1 uM | 1 uM             | 10 uM        | 0.1 uM                 | 1 uM                       | 10 uM      | 0.1 uM               | 1 uM                     | 10 uM |       |
|             | 100                      | 30   | 100                    | 75     | 0.1 uM           | 102.61       | 0.89                   | 91.21                      | 95.51      | 0.12                 | 0.24                     |       |       |
|             |                          |      |                        |        | 1 uM             | 105.60       | 0.87                   | 87.28                      | 94.30      | 0.12                 | -0.23                    |       |       |
|             |                          |      |                        |        | 10 uM            | 98.55        | 0.80                   | -                          | 133.27     | 0.22                 | 46.64                    |       |       |

Compound

Normalized Values (A and B Sets)

Responses

| PF-562271 | Percent Green Cells (AB) |      | Percent Red Cells (AB) |        | Average Response |              |                        |                            |            |                      |                          |       |       |
|-----------|--------------------------|------|------------------------|--------|------------------|--------------|------------------------|----------------------------|------------|----------------------|--------------------------|-------|-------|
|           | Percent Response         |      | Percent Response       |        | Dose             | Green Signal | Actual Pct Green Cells | Normalized Pct Green Cells | Red Signal | Actual Pct Red Cells | Normalized Pct Red Cells |       |       |
|           | concentration            |      | concentration          |        | 0.1 uM           | 1 uM         | 10 uM                  | 0.1 uM                     | 1 uM       | 10 uM                | 0.1 uM                   | 1 uM  | 10 uM |
|           | 0.1 uM                   | 1 uM | 10 uM                  | 0.1 uM | 1 uM             | 10 uM        | 0.1 uM                 | 1 uM                       | 10 uM      | 0.1 uM               | 1 uM                     | 10 uM |       |
|           | 100                      | 100  | 100                    | 100    | 0.1 uM           | 109.47       | 0.96                   | 248.50                     | 70.83      | 0.03                 | -50.31                   |       |       |
|           |                          |      |                        |        | 1 uM             | 90.82        | 0.79                   | 44.23                      | 71.65      | 0.02                 | -55.98                   |       |       |
|           |                          |      |                        |        | 10 uM            | 118.24       | 0.88                   | 119.42                     | 88.99      | 0.09                 | -17.59                   |       |       |

Compound

Normalized Values (A and B Sets)

Responses

|                  |       |                         |              |                        |                            |            |                      |                          |
|------------------|-------|-------------------------|--------------|------------------------|----------------------------|------------|----------------------|--------------------------|
| <b>PF-573228</b> |       | <b>Average Response</b> |              |                        |                            |            |                      |                          |
|                  |       | Dose                    | Green Signal | Actual Pct Green Cells | Normalized Pct Green Cells | Red Signal | Actual Pct Red Cells | Normalized Pct Red Cells |
|                  |       | 0.1 uM                  | 83.42        | 0.73                   | -75.38                     | 81.94      | 0.04                 | -47.12                   |
|                  |       | 1 uM                    | 95.25        | 0.79                   | 36.44                      | 85.00      | 0.04                 | -40.15                   |
| 10 uM            | 99.90 | 0.86                    | 94.74        | 150.24                 | 0.27                       | 69.57      |                      |                          |

Compound

Normalized Values (A and B Sets)

Responses

|                   |        |                         |              |                        |                            |            |                      |                          |
|-------------------|--------|-------------------------|--------------|------------------------|----------------------------|------------|----------------------|--------------------------|
| <b>PF-2545920</b> |        | <b>Average Response</b> |              |                        |                            |            |                      |                          |
|                   |        | Dose                    | Green Signal | Actual Pct Green Cells | Normalized Pct Green Cells | Red Signal | Actual Pct Red Cells | Normalized Pct Red Cells |
|                   |        | 0.1 uM                  | 89.52        | 0.83                   | 24.63                      | 79.76      | 0.03                 | -42.28                   |
|                   |        | 1 uM                    | 95.22        | 0.82                   | 59.53                      | 95.82      | 0.08                 | -21.94                   |
| 10 uM             | 102.01 | 0.94                    | 221.15       | 112.48                 | 0.13                       | 4.13       |                      |                          |

Compound

Normalized Values (A and B Sets)

Responses

|                   |        |                         |              |                        |                            |            |                      |                          |
|-------------------|--------|-------------------------|--------------|------------------------|----------------------------|------------|----------------------|--------------------------|
| <b>PF-3716556</b> |        | <b>Average Response</b> |              |                        |                            |            |                      |                          |
|                   |        | Dose                    | Green Signal | Actual Pct Green Cells | Normalized Pct Green Cells | Red Signal | Actual Pct Red Cells | Normalized Pct Red Cells |
|                   |        | 0.1 uM                  | 100.49       | 0.91                   | 114.07                     | 83.85      | 0.04                 | -34.17                   |
|                   |        | 1 uM                    | 92.85        | 0.77                   | 32.28                      | 75.87      | 0.04                 | -40.10                   |
| 10 uM             | 101.67 | 0.93                    | 433.43       | 79.90                  | 0.03                       | -42.52     |                      |                          |

Compound

Normalized Values (A and B Sets)

Responses

|                    |       |                         |              |                        |                            |            |                      |                          |
|--------------------|-------|-------------------------|--------------|------------------------|----------------------------|------------|----------------------|--------------------------|
| <b>PF-04620110</b> |       | <b>Average Response</b> |              |                        |                            |            |                      |                          |
|                    |       | Dose                    | Green Signal | Actual Pct Green Cells | Normalized Pct Green Cells | Red Signal | Actual Pct Red Cells | Normalized Pct Red Cells |
|                    |       | 0.1 uM                  | 96.82        | 0.88                   | 36.37                      | 96.77      | 0.11                 | -8.35                    |
|                    |       | 1 uM                    | 97.49        | 0.85                   | 94.37                      | 99.86      | 0.11                 | -10.15                   |
| 10 uM              | 94.14 | 0.81                    | 40.14        | 96.18                  | 0.11                       | -8.53      |                      |                          |

Compound

Normalized Values (A and B Sets)

Responses

|                    |       |                         |              |                        |                            |            |                      |                          |
|--------------------|-------|-------------------------|--------------|------------------------|----------------------------|------------|----------------------|--------------------------|
| <b>PF-04691502</b> |       | <b>Average Response</b> |              |                        |                            |            |                      |                          |
|                    |       | Dose                    | Green Signal | Actual Pct Green Cells | Normalized Pct Green Cells | Red Signal | Actual Pct Red Cells | Normalized Pct Red Cells |
|                    |       | 0.1 uM                  | 91.53        | 0.88                   | 84.47                      | 70.24      | 0.02                 | -43.55                   |
|                    |       | 1 uM                    | 88.21        | 0.79                   | 56.58                      | 96.60      | 0.07                 | -22.79                   |
| 10 uM              | 96.14 | 0.80                    | 434.61       | 107.11                 | 0.11                       | -8.05      |                      |                          |



Compound

Normalized Values (A and B Sets)

Responses

|                   |       |                         |              |                        |                            |            |                      |                          |
|-------------------|-------|-------------------------|--------------|------------------------|----------------------------|------------|----------------------|--------------------------|
| <b>PF-4708671</b> |       | <b>Average Response</b> |              |                        |                            |            |                      |                          |
|                   |       | Dose                    | Green Signal | Actual Pct Green Cells | Normalized Pct Green Cells | Red Signal | Actual Pct Red Cells | Normalized Pct Red Cells |
|                   |       | 0.1 uM                  | 91.98        | 0.90                   | 105.42                     | 73.98      | 0.03                 | -43.36                   |
|                   |       | 1 uM                    | 87.40        | 0.76                   | 32.36                      | 72.45      | 0.02                 | -46.89                   |
| 10 uM             | 98.85 | 0.92                    | 136.56       | 83.66                  | 0.05                       | -35.24     |                      |                          |

Compound

Normalized Values (A and B Sets)

Responses

|                               |       |                         |              |                        |                            |            |                      |                          |
|-------------------------------|-------|-------------------------|--------------|------------------------|----------------------------|------------|----------------------|--------------------------|
| <b>PF-04929113 (SNX-5422)</b> |       | <b>Average Response</b> |              |                        |                            |            |                      |                          |
|                               |       | Dose                    | Green Signal | Actual Pct Green Cells | Normalized Pct Green Cells | Red Signal | Actual Pct Red Cells | Normalized Pct Red Cells |
|                               |       | 0.1 uM                  | 121.17       | 0.95                   | 152.78                     | 101.85     | 0.15                 | 18.17                    |
|                               |       | 1 uM                    | 93.64        | 0.71                   | 1.71                       | 113.34     | 0.17                 | 20.32                    |
| 10 uM                         | 96.37 | 0.81                    | 307.38       | 89.79                  | 0.08                       | -20.02     |                      |                          |

Compound

Normalized Values (A and B Sets)

Responses

|                   |       |                         |              |                        |                            |            |                      |                          |
|-------------------|-------|-------------------------|--------------|------------------------|----------------------------|------------|----------------------|--------------------------|
| <b>PF-4981517</b> |       | <b>Average Response</b> |              |                        |                            |            |                      |                          |
|                   |       | Dose                    | Green Signal | Actual Pct Green Cells | Normalized Pct Green Cells | Red Signal | Actual Pct Red Cells | Normalized Pct Red Cells |
|                   |       | 0.1 uM                  | 86.00        | 0.81                   | 144.67                     | 75.27      | 0.03                 | -49.84                   |
|                   |       | 1 uM                    | 82.95        | 0.67                   | -31.38                     | 63.44      | 0.01                 | -63.25                   |
| 10 uM             | 91.69 | 0.79                    | 21.09        | 97.35                  | 0.08                       | -22.97     |                      |                          |

Compound

Normalized Values (A and B Sets)

Responses

|                              |        |                         |              |                        |                            |            |                      |                          |
|------------------------------|--------|-------------------------|--------------|------------------------|----------------------------|------------|----------------------|--------------------------|
| <b>PF-05212384 (PKI-587)</b> |        | <b>Average Response</b> |              |                        |                            |            |                      |                          |
|                              |        | Dose                    | Green Signal | Actual Pct Green Cells | Normalized Pct Green Cells | Red Signal | Actual Pct Red Cells | Normalized Pct Red Cells |
|                              |        | 0.1 uM                  | 87.21        | 0.80                   | 7.62                       | 99.07      | 0.11                 | -3.52                    |
|                              |        | 1 uM                    | 113.30       | 0.91                   | 106.38                     | 115.56     | 0.19                 | 28.49                    |
| 10 uM                        | 106.59 | 0.95                    | 390.85       | 112.63                 | 0.15                       | 11.20      |                      |                          |

Compound

Normalized Values (A and B Sets)

Responses

|                   |        |                         |              |                        |                            |            |                      |                          |
|-------------------|--------|-------------------------|--------------|------------------------|----------------------------|------------|----------------------|--------------------------|
| <b>PF-5274857</b> |        | <b>Average Response</b> |              |                        |                            |            |                      |                          |
|                   |        | Dose                    | Green Signal | Actual Pct Green Cells | Normalized Pct Green Cells | Red Signal | Actual Pct Red Cells | Normalized Pct Red Cells |
|                   |        | 0.1 uM                  | 107.33       | 0.95                   | 152.69                     | 80.08      | 0.05                 | -31.99                   |
|                   |        | 1 uM                    | 106.81       | 0.88                   | 98.53                      | 97.67      | 0.10                 | -12.59                   |
| 10 uM             | 109.71 | 0.94                    | 452.52       | 90.43                  | 0.07                       | -26.57     |                      |                          |

Compound

Normalized Values (A and B Sets)

Responses

| PFI-1 (PF-6405761) | Percent Green Cells (AB) |  | Percent Red Cells (AB) |  | Average Response |              |                        |                            |            |                      |                          |
|--------------------|--------------------------|--|------------------------|--|------------------|--------------|------------------------|----------------------------|------------|----------------------|--------------------------|
|                    | Percent Response         |  | Percent Response       |  | Dose             | Green Signal | Actual Pct Green Cells | Normalized Pct Green Cells | Red Signal | Actual Pct Red Cells | Normalized Pct Red Cells |
|                    | 100                      |  | 100                    |  | 0.1 uM           | 99.46        | 0.90                   | 102.88                     | 105.21     | 0.10                 | -23.60                   |
|                    | 0                        |  | 0                      |  | 1 uM             | 91.45        | 0.85                   | 58.17                      | 113.02     | 0.13                 | 1.61                     |
|                    | 0.1 uM                   |  | 0.1 uM                 |  | 10 uM            | 92.92        | 0.82                   | 66.34                      | 115.27     | 0.12                 | 1.02                     |
|                    | 1 uM                     |  | 1 uM                   |  |                  |              |                        |                            |            |                      |                          |
|                    | 10 uM                    |  | 10 uM                  |  |                  |              |                        |                            |            |                      |                          |

Compound

Normalized Values (A and B Sets)

Responses

| PH-797804 | Percent Green Cells (AB) |  | Percent Red Cells (AB) |  | Average Response |              |                        |                            |            |                      |                          |
|-----------|--------------------------|--|------------------------|--|------------------|--------------|------------------------|----------------------------|------------|----------------------|--------------------------|
|           | Percent Response         |  | Percent Response       |  | Dose             | Green Signal | Actual Pct Green Cells | Normalized Pct Green Cells | Red Signal | Actual Pct Red Cells | Normalized Pct Red Cells |
|           | 100                      |  | 100                    |  | 0.1 uM           | 90.87        | 0.80                   | 17.58                      | 86.90      | 0.06                 | -34.96                   |
|           | 0                        |  | 0                      |  | 1 uM             | 81.07        | 0.74                   | 693.84                     | 88.10      | 0.08                 | -8.54                    |
|           | 0.1 uM                   |  | 0.1 uM                 |  | 10 uM            | 108.86       | 0.97                   | 146.33                     | 96.66      | 0.18                 | 24.55                    |
|           | 1 uM                     |  | 1 uM                   |  |                  |              |                        |                            |            |                      |                          |
|           | 10 uM                    |  | 10 uM                  |  |                  |              |                        |                            |            |                      |                          |

Compound

Normalized Values (A and B Sets)

Responses

| PHA-665752 | Percent Green Cells (AB) |  | Percent Red Cells (AB) |  | Average Response |              |                        |                            |            |                      |                          |
|------------|--------------------------|--|------------------------|--|------------------|--------------|------------------------|----------------------------|------------|----------------------|--------------------------|
|            | Percent Response         |  | Percent Response       |  | Dose             | Green Signal | Actual Pct Green Cells | Normalized Pct Green Cells | Red Signal | Actual Pct Red Cells | Normalized Pct Red Cells |
|            | 100                      |  | 100                    |  | 0.1 uM           | 93.89        | 0.83                   | 9.33                       | 70.38      | 0.02                 | -64.62                   |
|            | 0                        |  | 0                      |  | 1 uM             | 90.53        | 0.65                   | 152.39                     | 77.56      | 0.02                 | -48.54                   |
|            | 0.1 uM                   |  | 0.1 uM                 |  | 10 uM            | 4.08         | 0.02                   | 470.85                     | 98.41      | 0.05                 | -33.62                   |
|            | 1 uM                     |  | 1 uM                   |  |                  |              |                        |                            |            |                      |                          |
|            | 10 uM                    |  | 10 uM                  |  |                  |              |                        |                            |            |                      |                          |

Compound

Normalized Values (A and B Sets)

Responses

| PHA-680632 | Percent Green Cells (AB) |  | Percent Red Cells (AB) |  | Average Response |              |                        |                            |            |                      |                          |
|------------|--------------------------|--|------------------------|--|------------------|--------------|------------------------|----------------------------|------------|----------------------|--------------------------|
|            | Percent Response         |  | Percent Response       |  | Dose             | Green Signal | Actual Pct Green Cells | Normalized Pct Green Cells | Red Signal | Actual Pct Red Cells | Normalized Pct Red Cells |
|            | 100                      |  | 100                    |  | 0.1 uM           | 106.75       | 0.93                   | 114.78                     | 84.20      | 0.06                 | -36.10                   |
|            | 0                        |  | 0                      |  | 1 uM             | 93.06        | 0.78                   | -49.74                     | 108.62     | 0.13                 | -0.05                    |
|            | 0.1 uM                   |  | 0.1 uM                 |  | 10 uM            | 97.77        | 0.86                   | 84.67                      | 96.36      | 0.06                 | -28.73                   |
|            | 1 uM                     |  | 1 uM                   |  |                  |              |                        |                            |            |                      |                          |
|            | 10 uM                    |  | 10 uM                  |  |                  |              |                        |                            |            |                      |                          |

Compound

Normalized Values (A and B Sets)

Responses

| PHA-793887 | Percent Green Cells (AB) |  | Percent Red Cells (AB) |  | Average Response |              |                        |                            |            |                      |                          |
|------------|--------------------------|--|------------------------|--|------------------|--------------|------------------------|----------------------------|------------|----------------------|--------------------------|
|            | Percent Response         |  | Percent Response       |  | Dose             | Green Signal | Actual Pct Green Cells | Normalized Pct Green Cells | Red Signal | Actual Pct Red Cells | Normalized Pct Red Cells |
|            | 100                      |  | 100                    |  | 0.1 uM           | 105.35       | 0.89                   | 118.48                     | 106.30     | 0.11                 | -21.34                   |
|            | 0                        |  | 0                      |  | 1 uM             | 103.92       | 0.87                   | 68.11                      | 96.94      | 0.09                 | -16.71                   |
|            | 0.1 uM                   |  | 0.1 uM                 |  |                  |              |                        |                            |            |                      |                          |
|            | 1 uM                     |  | 1 uM                   |  |                  |              |                        |                            |            |                      |                          |
|            | 10 uM                    |  | 10 uM                  |  |                  |              |                        |                            |            |                      |                          |

| Compound | Normalized Values (A and B Sets) | Responses                                 |
|----------|----------------------------------|-------------------------------------------|
|          |                                  | 10 uM 81.45 0.57 -92.08 84.28 0.07 -18.16 |

| Compound                     | Normalized Values (A and B Sets) | Responses                                                                                                                                                                                                                                                                                                                                                                                                                                                                                                                                                                                                                          |              |                        |                            |                            |                      |                          |                          |        |        |      |        |       |      |        |      |        |      |       |        |      |        |       |        |      |        |        |      |      |
|------------------------------|----------------------------------|------------------------------------------------------------------------------------------------------------------------------------------------------------------------------------------------------------------------------------------------------------------------------------------------------------------------------------------------------------------------------------------------------------------------------------------------------------------------------------------------------------------------------------------------------------------------------------------------------------------------------------|--------------|------------------------|----------------------------|----------------------------|----------------------|--------------------------|--------------------------|--------|--------|------|--------|-------|------|--------|------|--------|------|-------|--------|------|--------|-------|--------|------|--------|--------|------|------|
| <b>Phentolamine Mesylate</b> |                                  | <b>Average Response</b>                                                                                                                                                                                                                                                                                                                                                                                                                                                                                                                                                                                                            |              |                        |                            |                            |                      |                          |                          |        |        |      |        |       |      |        |      |        |      |       |        |      |        |       |        |      |        |        |      |      |
|                              |                                  | <table border="1"> <thead> <tr> <th>Dose</th> <th>Green Signal</th> <th>Actual Pct Green Cells</th> <th>Normalized Pct Green Cells</th> <th>Red Signal</th> <th>Actual Pct Red Cells</th> <th>Normalized Pct Red Cells</th> </tr> </thead> <tbody> <tr> <td>0.1 uM</td> <td>108.02</td> <td>0.92</td> <td>105.35</td> <td>95.54</td> <td>0.07</td> <td>-32.24</td> </tr> <tr> <td>1 uM</td> <td>103.50</td> <td>0.87</td> <td>54.36</td> <td>103.65</td> <td>0.09</td> <td>-16.73</td> </tr> <tr> <td>10 uM</td> <td>116.38</td> <td>0.94</td> <td>139.71</td> <td>132.23</td> <td>0.16</td> <td>9.10</td> </tr> </tbody> </table> | Dose         | Green Signal           | Actual Pct Green Cells     | Normalized Pct Green Cells | Red Signal           | Actual Pct Red Cells     | Normalized Pct Red Cells | 0.1 uM | 108.02 | 0.92 | 105.35 | 95.54 | 0.07 | -32.24 | 1 uM | 103.50 | 0.87 | 54.36 | 103.65 | 0.09 | -16.73 | 10 uM | 116.38 | 0.94 | 139.71 | 132.23 | 0.16 | 9.10 |
|                              |                                  | Dose                                                                                                                                                                                                                                                                                                                                                                                                                                                                                                                                                                                                                               | Green Signal | Actual Pct Green Cells | Normalized Pct Green Cells | Red Signal                 | Actual Pct Red Cells | Normalized Pct Red Cells |                          |        |        |      |        |       |      |        |      |        |      |       |        |      |        |       |        |      |        |        |      |      |
|                              |                                  | 0.1 uM                                                                                                                                                                                                                                                                                                                                                                                                                                                                                                                                                                                                                             | 108.02       | 0.92                   | 105.35                     | 95.54                      | 0.07                 | -32.24                   |                          |        |        |      |        |       |      |        |      |        |      |       |        |      |        |       |        |      |        |        |      |      |
| 1 uM                         | 103.50                           | 0.87                                                                                                                                                                                                                                                                                                                                                                                                                                                                                                                                                                                                                               | 54.36        | 103.65                 | 0.09                       | -16.73                     |                      |                          |                          |        |        |      |        |       |      |        |      |        |      |       |        |      |        |       |        |      |        |        |      |      |
| 10 uM                        | 116.38                           | 0.94                                                                                                                                                                                                                                                                                                                                                                                                                                                                                                                                                                                                                               | 139.71       | 132.23                 | 0.16                       | 9.10                       |                      |                          |                          |        |        |      |        |       |      |        |      |        |      |       |        |      |        |       |        |      |        |        |      |      |

| Compound                | Normalized Values (A and B Sets) | Responses                                                                                                                                                                                                                                                                                                                                                                                                                                                                                                                                                                                                                    |              |                        |                            |                            |                      |                          |                          |        |       |      |       |       |      |        |      |       |      |       |       |      |       |       |       |      |       |       |      |        |
|-------------------------|----------------------------------|------------------------------------------------------------------------------------------------------------------------------------------------------------------------------------------------------------------------------------------------------------------------------------------------------------------------------------------------------------------------------------------------------------------------------------------------------------------------------------------------------------------------------------------------------------------------------------------------------------------------------|--------------|------------------------|----------------------------|----------------------------|----------------------|--------------------------|--------------------------|--------|-------|------|-------|-------|------|--------|------|-------|------|-------|-------|------|-------|-------|-------|------|-------|-------|------|--------|
| <b>Phenytoin sodium</b> |                                  | <b>Average Response</b>                                                                                                                                                                                                                                                                                                                                                                                                                                                                                                                                                                                                      |              |                        |                            |                            |                      |                          |                          |        |       |      |       |       |      |        |      |       |      |       |       |      |       |       |       |      |       |       |      |        |
|                         |                                  | <table border="1"> <thead> <tr> <th>Dose</th> <th>Green Signal</th> <th>Actual Pct Green Cells</th> <th>Normalized Pct Green Cells</th> <th>Red Signal</th> <th>Actual Pct Red Cells</th> <th>Normalized Pct Red Cells</th> </tr> </thead> <tbody> <tr> <td>0.1 uM</td> <td>98.10</td> <td>0.87</td> <td>74.91</td> <td>76.84</td> <td>0.03</td> <td>-56.56</td> </tr> <tr> <td>1 uM</td> <td>95.93</td> <td>0.89</td> <td>46.69</td> <td>99.58</td> <td>0.16</td> <td>51.74</td> </tr> <tr> <td>10 uM</td> <td>88.60</td> <td>0.84</td> <td>22.30</td> <td>72.50</td> <td>0.02</td> <td>-40.40</td> </tr> </tbody> </table> | Dose         | Green Signal           | Actual Pct Green Cells     | Normalized Pct Green Cells | Red Signal           | Actual Pct Red Cells     | Normalized Pct Red Cells | 0.1 uM | 98.10 | 0.87 | 74.91 | 76.84 | 0.03 | -56.56 | 1 uM | 95.93 | 0.89 | 46.69 | 99.58 | 0.16 | 51.74 | 10 uM | 88.60 | 0.84 | 22.30 | 72.50 | 0.02 | -40.40 |
|                         |                                  | Dose                                                                                                                                                                                                                                                                                                                                                                                                                                                                                                                                                                                                                         | Green Signal | Actual Pct Green Cells | Normalized Pct Green Cells | Red Signal                 | Actual Pct Red Cells | Normalized Pct Red Cells |                          |        |       |      |       |       |      |        |      |       |      |       |       |      |       |       |       |      |       |       |      |        |
|                         |                                  | 0.1 uM                                                                                                                                                                                                                                                                                                                                                                                                                                                                                                                                                                                                                       | 98.10        | 0.87                   | 74.91                      | 76.84                      | 0.03                 | -56.56                   |                          |        |       |      |       |       |      |        |      |       |      |       |       |      |       |       |       |      |       |       |      |        |
| 1 uM                    | 95.93                            | 0.89                                                                                                                                                                                                                                                                                                                                                                                                                                                                                                                                                                                                                         | 46.69        | 99.58                  | 0.16                       | 51.74                      |                      |                          |                          |        |       |      |       |       |      |        |      |       |      |       |       |      |       |       |       |      |       |       |      |        |
| 10 uM                   | 88.60                            | 0.84                                                                                                                                                                                                                                                                                                                                                                                                                                                                                                                                                                                                                         | 22.30        | 72.50                  | 0.02                       | -40.40                     |                      |                          |                          |        |       |      |       |       |      |        |      |       |      |       |       |      |       |       |       |      |       |       |      |        |

| Compound       | Normalized Values (A and B Sets) | Responses                                                                                                                                                                                                                                                                                                                                                                                                                                                                                                                                                                                                                        |              |                        |                            |                            |                      |                          |                          |        |        |      |       |       |      |        |      |        |      |        |        |      |      |       |       |      |       |        |      |        |
|----------------|----------------------------------|----------------------------------------------------------------------------------------------------------------------------------------------------------------------------------------------------------------------------------------------------------------------------------------------------------------------------------------------------------------------------------------------------------------------------------------------------------------------------------------------------------------------------------------------------------------------------------------------------------------------------------|--------------|------------------------|----------------------------|----------------------------|----------------------|--------------------------|--------------------------|--------|--------|------|-------|-------|------|--------|------|--------|------|--------|--------|------|------|-------|-------|------|-------|--------|------|--------|
| <b>PHT-427</b> |                                  | <b>Average Response</b>                                                                                                                                                                                                                                                                                                                                                                                                                                                                                                                                                                                                          |              |                        |                            |                            |                      |                          |                          |        |        |      |       |       |      |        |      |        |      |        |        |      |      |       |       |      |       |        |      |        |
|                |                                  | <table border="1"> <thead> <tr> <th>Dose</th> <th>Green Signal</th> <th>Actual Pct Green Cells</th> <th>Normalized Pct Green Cells</th> <th>Red Signal</th> <th>Actual Pct Red Cells</th> <th>Normalized Pct Red Cells</th> </tr> </thead> <tbody> <tr> <td>0.1 uM</td> <td>105.84</td> <td>0.90</td> <td>92.77</td> <td>95.31</td> <td>0.07</td> <td>-38.65</td> </tr> <tr> <td>1 uM</td> <td>110.95</td> <td>0.91</td> <td>115.74</td> <td>114.89</td> <td>0.14</td> <td>7.87</td> </tr> <tr> <td>10 uM</td> <td>97.17</td> <td>0.83</td> <td>70.35</td> <td>108.42</td> <td>0.09</td> <td>-17.50</td> </tr> </tbody> </table> | Dose         | Green Signal           | Actual Pct Green Cells     | Normalized Pct Green Cells | Red Signal           | Actual Pct Red Cells     | Normalized Pct Red Cells | 0.1 uM | 105.84 | 0.90 | 92.77 | 95.31 | 0.07 | -38.65 | 1 uM | 110.95 | 0.91 | 115.74 | 114.89 | 0.14 | 7.87 | 10 uM | 97.17 | 0.83 | 70.35 | 108.42 | 0.09 | -17.50 |
|                |                                  | Dose                                                                                                                                                                                                                                                                                                                                                                                                                                                                                                                                                                                                                             | Green Signal | Actual Pct Green Cells | Normalized Pct Green Cells | Red Signal                 | Actual Pct Red Cells | Normalized Pct Red Cells |                          |        |        |      |       |       |      |        |      |        |      |        |        |      |      |       |       |      |       |        |      |        |
|                |                                  | 0.1 uM                                                                                                                                                                                                                                                                                                                                                                                                                                                                                                                                                                                                                           | 105.84       | 0.90                   | 92.77                      | 95.31                      | 0.07                 | -38.65                   |                          |        |        |      |       |       |      |        |      |        |      |        |        |      |      |       |       |      |       |        |      |        |
| 1 uM           | 110.95                           | 0.91                                                                                                                                                                                                                                                                                                                                                                                                                                                                                                                                                                                                                             | 115.74       | 114.89                 | 0.14                       | 7.87                       |                      |                          |                          |        |        |      |       |       |      |        |      |        |      |        |        |      |      |       |       |      |       |        |      |        |
| 10 uM          | 97.17                            | 0.83                                                                                                                                                                                                                                                                                                                                                                                                                                                                                                                                                                                                                             | 70.35        | 108.42                 | 0.09                       | -17.50                     |                      |                          |                          |        |        |      |       |       |      |        |      |        |      |        |        |      |      |       |       |      |       |        |      |        |

| Compound           | Normalized Values (A and B Sets) | Responses                                                                                                                                                                                                                                                                                                                                                                                                                                                                                                                                                                                                                       |              |                        |                            |                            |                      |                          |                          |        |        |      |        |       |      |        |      |       |      |       |       |      |        |       |       |      |       |       |      |        |
|--------------------|----------------------------------|---------------------------------------------------------------------------------------------------------------------------------------------------------------------------------------------------------------------------------------------------------------------------------------------------------------------------------------------------------------------------------------------------------------------------------------------------------------------------------------------------------------------------------------------------------------------------------------------------------------------------------|--------------|------------------------|----------------------------|----------------------------|----------------------|--------------------------|--------------------------|--------|--------|------|--------|-------|------|--------|------|-------|------|-------|-------|------|--------|-------|-------|------|-------|-------|------|--------|
| <b>Picateannol</b> |                                  | <b>Average Response</b>                                                                                                                                                                                                                                                                                                                                                                                                                                                                                                                                                                                                         |              |                        |                            |                            |                      |                          |                          |        |        |      |        |       |      |        |      |       |      |       |       |      |        |       |       |      |       |       |      |        |
|                    |                                  | <table border="1"> <thead> <tr> <th>Dose</th> <th>Green Signal</th> <th>Actual Pct Green Cells</th> <th>Normalized Pct Green Cells</th> <th>Red Signal</th> <th>Actual Pct Red Cells</th> <th>Normalized Pct Red Cells</th> </tr> </thead> <tbody> <tr> <td>0.1 uM</td> <td>108.68</td> <td>0.94</td> <td>249.48</td> <td>89.20</td> <td>0.09</td> <td>-20.96</td> </tr> <tr> <td>1 uM</td> <td>92.95</td> <td>0.76</td> <td>26.98</td> <td>93.30</td> <td>0.09</td> <td>-20.08</td> </tr> <tr> <td>10 uM</td> <td>91.56</td> <td>0.80</td> <td>17.11</td> <td>91.81</td> <td>0.08</td> <td>-20.95</td> </tr> </tbody> </table> | Dose         | Green Signal           | Actual Pct Green Cells     | Normalized Pct Green Cells | Red Signal           | Actual Pct Red Cells     | Normalized Pct Red Cells | 0.1 uM | 108.68 | 0.94 | 249.48 | 89.20 | 0.09 | -20.96 | 1 uM | 92.95 | 0.76 | 26.98 | 93.30 | 0.09 | -20.08 | 10 uM | 91.56 | 0.80 | 17.11 | 91.81 | 0.08 | -20.95 |
|                    |                                  | Dose                                                                                                                                                                                                                                                                                                                                                                                                                                                                                                                                                                                                                            | Green Signal | Actual Pct Green Cells | Normalized Pct Green Cells | Red Signal                 | Actual Pct Red Cells | Normalized Pct Red Cells |                          |        |        |      |        |       |      |        |      |       |      |       |       |      |        |       |       |      |       |       |      |        |
|                    |                                  | 0.1 uM                                                                                                                                                                                                                                                                                                                                                                                                                                                                                                                                                                                                                          | 108.68       | 0.94                   | 249.48                     | 89.20                      | 0.09                 | -20.96                   |                          |        |        |      |        |       |      |        |      |       |      |       |       |      |        |       |       |      |       |       |      |        |
| 1 uM               | 92.95                            | 0.76                                                                                                                                                                                                                                                                                                                                                                                                                                                                                                                                                                                                                            | 26.98        | 93.30                  | 0.09                       | -20.08                     |                      |                          |                          |        |        |      |        |       |      |        |      |       |      |       |       |      |        |       |       |      |       |       |      |        |
| 10 uM              | 91.56                            | 0.80                                                                                                                                                                                                                                                                                                                                                                                                                                                                                                                                                                                                                            | 17.11        | 91.81                  | 0.08                       | -20.95                     |                      |                          |                          |        |        |      |        |       |      |        |      |       |      |       |       |      |        |       |       |      |       |       |      |        |

| Compound            | Normalized Values (A and B Sets) | Responses                                                                                                                                                                                                                                                                                                                                             |                            |              |                        |                            |            |                      |                          |  |  |  |  |  |
|---------------------|----------------------------------|-------------------------------------------------------------------------------------------------------------------------------------------------------------------------------------------------------------------------------------------------------------------------------------------------------------------------------------------------------|----------------------------|--------------|------------------------|----------------------------|------------|----------------------|--------------------------|--|--|--|--|--|
| <b>Picrotoxinin</b> |                                  | <b>Average Response</b>                                                                                                                                                                                                                                                                                                                               |                            |              |                        |                            |            |                      |                          |  |  |  |  |  |
|                     |                                  | <table border="1"> <thead> <tr> <th>Dose</th> <th>Green Signal</th> <th>Actual Pct Green Cells</th> <th>Normalized Pct Green Cells</th> <th>Red Signal</th> <th>Actual Pct Red Cells</th> <th>Normalized Pct Red Cells</th> </tr> </thead> <tbody> <tr> <td></td> <td></td> <td></td> <td></td> <td></td> <td></td> <td></td> </tr> </tbody> </table> | Dose                       | Green Signal | Actual Pct Green Cells | Normalized Pct Green Cells | Red Signal | Actual Pct Red Cells | Normalized Pct Red Cells |  |  |  |  |  |
| Dose                | Green Signal                     | Actual Pct Green Cells                                                                                                                                                                                                                                                                                                                                | Normalized Pct Green Cells | Red Signal   | Actual Pct Red Cells   | Normalized Pct Red Cells   |            |                      |                          |  |  |  |  |  |
|                     |                                  |                                                                                                                                                                                                                                                                                                                                                       |                            |              |                        |                            |            |                      |                          |  |  |  |  |  |

Compound

Normalized Values (A and B Sets)

Responses

|  |        |       |      |       |       |      |        |  |  |  |  |
|--|--------|-------|------|-------|-------|------|--------|--|--|--|--|
|  |        |       |      |       |       |      |        |  |  |  |  |
|  | 0.1 uM | 86.24 | 0.76 | 30.64 | 86.37 | 0.07 | -27.50 |  |  |  |  |
|  | 1 uM   | 99.23 | 0.85 | 93.19 | 95.09 | 0.09 | -19.59 |  |  |  |  |
|  | 10 uM  | 99.81 | 0.88 | 97.33 | 73.17 | 0.03 | -50.07 |  |  |  |  |

Compound

Normalized Values (A and B Sets)

Responses

|                    |        |              |                        |                            |                         |                      |                          |  |  |  |  |
|--------------------|--------|--------------|------------------------|----------------------------|-------------------------|----------------------|--------------------------|--|--|--|--|
| <b>Pifithrin-?</b> |        |              |                        |                            | <b>Average Response</b> |                      |                          |  |  |  |  |
|                    | Dose   | Green Signal | Actual Pct Green Cells | Normalized Pct Green Cells | Red Signal              | Actual Pct Red Cells | Normalized Pct Red Cells |  |  |  |  |
|                    | 0.1 uM | 76.04        | 0.65                   | -741.66                    | 72.84                   | 0.03                 | -50.87                   |  |  |  |  |
|                    | 1 uM   | 100.18       | 0.87                   | 107.67                     | 62.47                   | 0.01                 | -63.53                   |  |  |  |  |
| 10 uM              | 100.28 | 0.89         | 90.27                  | 95.23                      | 0.08                    | -21.53               |                          |  |  |  |  |

Compound

Normalized Values (A and B Sets)

Responses

|                           |        |              |                        |                            |                         |                      |                          |  |  |  |  |
|---------------------------|--------|--------------|------------------------|----------------------------|-------------------------|----------------------|--------------------------|--|--|--|--|
| <b>Pifithrin-? (PFT?)</b> |        |              |                        |                            | <b>Average Response</b> |                      |                          |  |  |  |  |
|                           | Dose   | Green Signal | Actual Pct Green Cells | Normalized Pct Green Cells | Red Signal              | Actual Pct Red Cells | Normalized Pct Red Cells |  |  |  |  |
|                           | 0.1 uM | 90.06        | 0.85                   | -178.22                    | 74.07                   | 0.04                 | -45.32                   |  |  |  |  |
|                           | 1 uM   | 96.50        | 0.85                   | 95.42                      | 74.57                   | 0.04                 | -48.93                   |  |  |  |  |
| 10 uM                     | 82.64  | 0.70         | -105.15                | 116.13                     | 0.22                    | 49.22                |                          |  |  |  |  |

Compound

Normalized Values (A and B Sets)

Responses

|               |        |              |                        |                            |                         |                      |                          |  |  |  |  |
|---------------|--------|--------------|------------------------|----------------------------|-------------------------|----------------------|--------------------------|--|--|--|--|
| <b>PIK-75</b> |        |              |                        |                            | <b>Average Response</b> |                      |                          |  |  |  |  |
|               | Dose   | Green Signal | Actual Pct Green Cells | Normalized Pct Green Cells | Red Signal              | Actual Pct Red Cells | Normalized Pct Red Cells |  |  |  |  |
|               | 0.1 uM | 100.01       | 0.80                   | 23.01                      | 74.39                   | 0.05                 | -41.10                   |  |  |  |  |
|               | 1 uM   | 86.65        | 0.71                   | -791.68                    | 96.22                   | 0.13                 | 5.32                     |  |  |  |  |
| 10 uM         | 82.92  | 0.65         | -150.06                | 90.03                      | 0.15                    | 13.82                |                          |  |  |  |  |

Compound

Normalized Values (A and B Sets)

Responses

|               |                         |              |                        |                            |            |                      |                          |  |  |  |
|---------------|-------------------------|--------------|------------------------|----------------------------|------------|----------------------|--------------------------|--|--|--|
| <b>PIK-93</b> | <b>Average Response</b> |              |                        |                            |            |                      |                          |  |  |  |
|               | Dose                    | Green Signal | Actual Pct Green Cells | Normalized Pct Green Cells | Red Signal | Actual Pct Red Cells | Normalized Pct Red Cells |  |  |  |
| 0.1 uM        | 100.43                  | 0.88         | 54.06                  | 79.78                      | 0.04       | -54.41               |                          |  |  |  |

Compound

Normalized Values (A and B Sets)

Responses

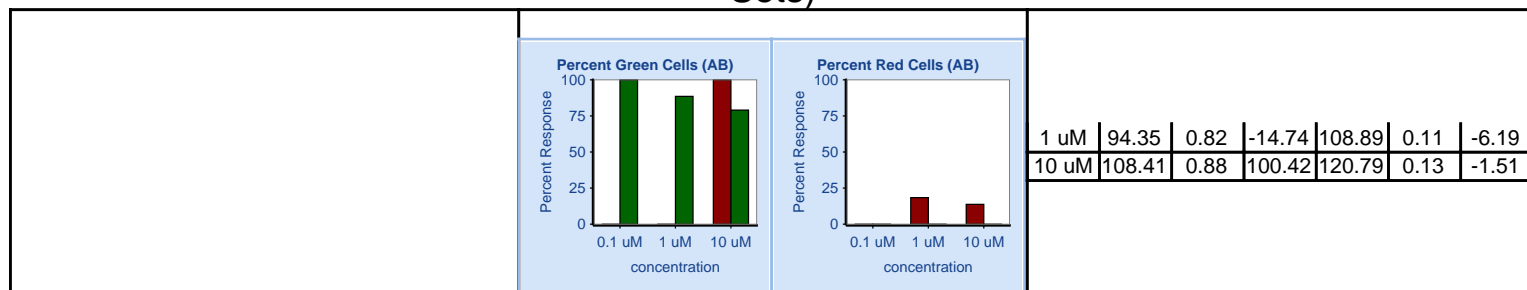

Compound

Normalized Values (A and B Sets)

Responses

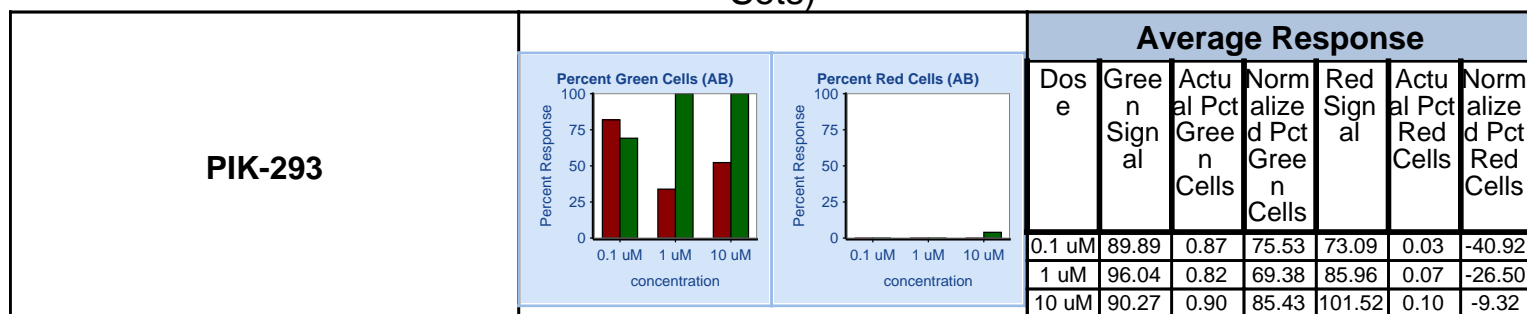

Compound

Normalized Values (A and B Sets)

Responses

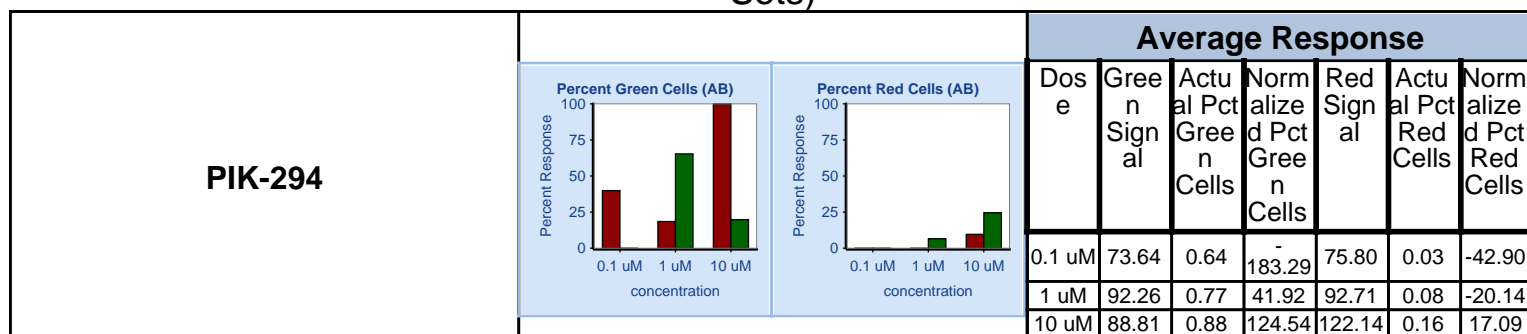

Compound

Normalized Values (A and B Sets)

Responses

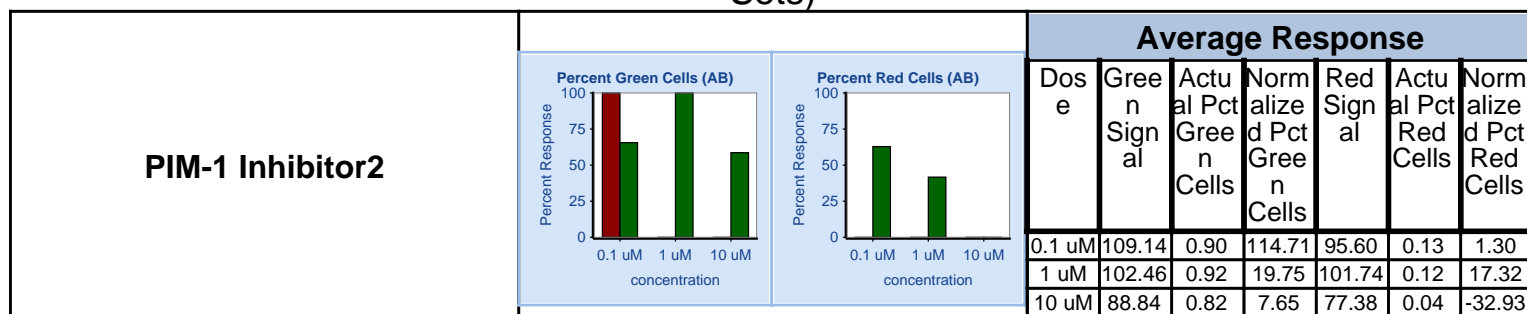

Compound

Normalized Values (A and B Sets)

Responses

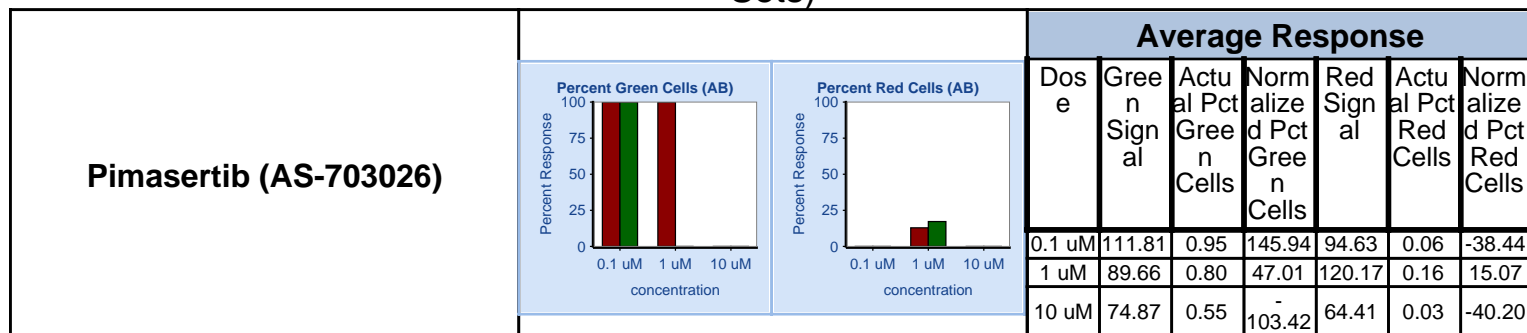

Compound

Normalized Values (A and B Sets)

Responses

| Pimecrolimus | Percent Green Cells (AB) |  | Percent Red Cells (AB) |  | Average Response |              |                        |                            |            |                      |                          |
|--------------|--------------------------|--|------------------------|--|------------------|--------------|------------------------|----------------------------|------------|----------------------|--------------------------|
|              | Percent Response         |  | Percent Response       |  | Dose             | Green Signal | Actual Pct Green Cells | Normalized Pct Green Cells | Red Signal | Actual Pct Red Cells | Normalized Pct Red Cells |
|              | 0.1 uM 1 uM 10 uM        |  | 0.1 uM 1 uM 10 uM      |  | 0.1 uM           | 111.04       | 0.94                   | 133.33                     | 102.67     | 0.17                 | 22.06                    |
|              | concentration            |  | concentration          |  | 1 uM             | 81.93        | 0.63                   | -78.51                     | 87.82      | 0.07                 | -30.49                   |
|              |                          |  |                        |  | 10 uM            | 116.44       | 0.94                   | 169.18                     | 92.72      | 0.06                 | -30.07                   |

Compound

Normalized Values (A and B Sets)

Responses

| Pimobendan | Percent Green Cells (AB) |  | Percent Red Cells (AB) |  | Average Response |              |                        |                            |            |                      |                          |
|------------|--------------------------|--|------------------------|--|------------------|--------------|------------------------|----------------------------|------------|----------------------|--------------------------|
|            | Percent Response         |  | Percent Response       |  | Dose             | Green Signal | Actual Pct Green Cells | Normalized Pct Green Cells | Red Signal | Actual Pct Red Cells | Normalized Pct Red Cells |
|            | 0.1 uM 1 uM 10 uM        |  | 0.1 uM 1 uM 10 uM      |  | 0.1 uM           | 109.78       | 0.94                   | 133.48                     | 98.53      | 0.08                 | -33.66                   |
|            | concentration            |  | concentration          |  | 1 uM             | 96.01        | 0.84                   | 30.70                      | 110.17     | 0.10                 | -13.45                   |
|            |                          |  |                        |  | 10 uM            | 109.55       | 0.88                   | 107.67                     | 107.67     | 0.08                 | -16.36                   |

Compound

Normalized Values (A and B Sets)

Responses

| Pinacidil | Percent Green Cells (AB) |  | Percent Red Cells (AB) |  | Average Response |              |                        |                            |            |                      |                          |
|-----------|--------------------------|--|------------------------|--|------------------|--------------|------------------------|----------------------------|------------|----------------------|--------------------------|
|           | Percent Response         |  | Percent Response       |  | Dose             | Green Signal | Actual Pct Green Cells | Normalized Pct Green Cells | Red Signal | Actual Pct Red Cells | Normalized Pct Red Cells |
|           | 0.1 uM 1 uM 10 uM        |  | 0.1 uM 1 uM 10 uM      |  | 0.1 uM           | 77.93        | 0.73                   | 0.03                       | 92.90      | 0.07                 | -26.56                   |
|           | concentration            |  | concentration          |  | 1 uM             | 93.91        | 0.76                   | 23.45                      | 105.80     | 0.13                 | -0.89                    |
|           |                          |  |                        |  | 10 uM            | 97.21        | 0.84                   | 68.98                      | 96.28      | 0.09                 | -16.53                   |

Compound

Normalized Values (A and B Sets)

Responses

| Pirarubicin | Percent Green Cells (AB) |  | Percent Red Cells (AB) |  | Average Response |              |                        |                            |            |                      |                          |
|-------------|--------------------------|--|------------------------|--|------------------|--------------|------------------------|----------------------------|------------|----------------------|--------------------------|
|             | Percent Response         |  | Percent Response       |  | Dose             | Green Signal | Actual Pct Green Cells | Normalized Pct Green Cells | Red Signal | Actual Pct Red Cells | Normalized Pct Red Cells |
|             | 0.1 uM 1 uM 10 uM        |  | 0.1 uM 1 uM 10 uM      |  | 0.1 uM           | 88.33        | 0.74                   | -24.91                     | 102.74     | 0.12                 | -14.77                   |
|             | concentration            |  | concentration          |  | 1 uM             | 101.00       | 0.88                   | 114.40                     | 11.72      | 0.02                 | -49.58                   |
|             |                          |  |                        |  | 10 uM            | 79.55        | 0.49                   | 156.31                     | 0.24       | 0.00                 | -52.84                   |

Compound

Normalized Values (A and B Sets)

Responses

| Pirfenidone | Percent Green Cells (AB) |  | Percent Red Cells (AB) |  | Average Response |              |                        |                            |            |                      |                          |
|-------------|--------------------------|--|------------------------|--|------------------|--------------|------------------------|----------------------------|------------|----------------------|--------------------------|
|             | Percent Response         |  | Percent Response       |  | Dose             | Green Signal | Actual Pct Green Cells | Normalized Pct Green Cells | Red Signal | Actual Pct Red Cells | Normalized Pct Red Cells |
|             | 0.1 uM 1 uM 10 uM        |  | 0.1 uM 1 uM 10 uM      |  | 0.1 uM           | 92.24        | 0.90                   | 158.43                     | 75.79      | 0.04                 | -43.86                   |
|             | concentration            |  | concentration          |  | 1 uM             | 86.89        | 0.75                   | 19.47                      | 68.33      | 0.02                 | -58.42                   |
|             |                          |  |                        |  | 10 uM            | 81.63        | 0.69                   | -84.44                     | 61.43      | 0.02                 | -54.59                   |

| Compound                    | Normalized Values (A and B Sets) | Responses                                                                                                                                                                                                                                                                                                                                                                                                                                                                                                                                                                                                                                                                          |                  |                        |                            |            |                      |                          |  |      |              |                        |                            |            |                      |                          |        |        |      |        |       |      |        |      |       |      |        |        |      |       |       |       |      |        |       |      |        |
|-----------------------------|----------------------------------|------------------------------------------------------------------------------------------------------------------------------------------------------------------------------------------------------------------------------------------------------------------------------------------------------------------------------------------------------------------------------------------------------------------------------------------------------------------------------------------------------------------------------------------------------------------------------------------------------------------------------------------------------------------------------------|------------------|------------------------|----------------------------|------------|----------------------|--------------------------|--|------|--------------|------------------------|----------------------------|------------|----------------------|--------------------------|--------|--------|------|--------|-------|------|--------|------|-------|------|--------|--------|------|-------|-------|-------|------|--------|-------|------|--------|
| <b>Pitavastatin Calcium</b> |                                  | <table border="1"> <thead> <tr> <th colspan="7">Average Response</th> </tr> <tr> <th>Dose</th> <th>Green Signal</th> <th>Actual Pct Green Cells</th> <th>Normalized Pct Green Cells</th> <th>Red Signal</th> <th>Actual Pct Red Cells</th> <th>Normalized Pct Red Cells</th> </tr> </thead> <tbody> <tr> <td>0.1 uM</td> <td>106.76</td> <td>0.93</td> <td>133.56</td> <td>91.13</td> <td>0.08</td> <td>-37.75</td> </tr> <tr> <td>1 uM</td> <td>95.75</td> <td>0.65</td> <td>236.25</td> <td>106.52</td> <td>0.12</td> <td>-2.56</td> </tr> <tr> <td>10 uM</td> <td>86.25</td> <td>0.70</td> <td>-37.56</td> <td>93.29</td> <td>0.05</td> <td>-29.44</td> </tr> </tbody> </table> | Average Response |                        |                            |            |                      |                          |  | Dose | Green Signal | Actual Pct Green Cells | Normalized Pct Green Cells | Red Signal | Actual Pct Red Cells | Normalized Pct Red Cells | 0.1 uM | 106.76 | 0.93 | 133.56 | 91.13 | 0.08 | -37.75 | 1 uM | 95.75 | 0.65 | 236.25 | 106.52 | 0.12 | -2.56 | 10 uM | 86.25 | 0.70 | -37.56 | 93.29 | 0.05 | -29.44 |
|                             |                                  | Average Response                                                                                                                                                                                                                                                                                                                                                                                                                                                                                                                                                                                                                                                                   |                  |                        |                            |            |                      |                          |  |      |              |                        |                            |            |                      |                          |        |        |      |        |       |      |        |      |       |      |        |        |      |       |       |       |      |        |       |      |        |
|                             |                                  | Dose                                                                                                                                                                                                                                                                                                                                                                                                                                                                                                                                                                                                                                                                               | Green Signal     | Actual Pct Green Cells | Normalized Pct Green Cells | Red Signal | Actual Pct Red Cells | Normalized Pct Red Cells |  |      |              |                        |                            |            |                      |                          |        |        |      |        |       |      |        |      |       |      |        |        |      |       |       |       |      |        |       |      |        |
|                             |                                  | 0.1 uM                                                                                                                                                                                                                                                                                                                                                                                                                                                                                                                                                                                                                                                                             | 106.76           | 0.93                   | 133.56                     | 91.13      | 0.08                 | -37.75                   |  |      |              |                        |                            |            |                      |                          |        |        |      |        |       |      |        |      |       |      |        |        |      |       |       |       |      |        |       |      |        |
| 1 uM                        | 95.75                            | 0.65                                                                                                                                                                                                                                                                                                                                                                                                                                                                                                                                                                                                                                                                               | 236.25           | 106.52                 | 0.12                       | -2.56      |                      |                          |  |      |              |                        |                            |            |                      |                          |        |        |      |        |       |      |        |      |       |      |        |        |      |       |       |       |      |        |       |      |        |
| 10 uM                       | 86.25                            | 0.70                                                                                                                                                                                                                                                                                                                                                                                                                                                                                                                                                                                                                                                                               | -37.56           | 93.29                  | 0.05                       | -29.44     |                      |                          |  |      |              |                        |                            |            |                      |                          |        |        |      |        |       |      |        |      |       |      |        |        |      |       |       |       |      |        |       |      |        |

| Compound    | Normalized Values (A and B Sets) | Responses                                                                                                                                                                                                                                                                                                                                                                                                                                                                                                                                                                                                                                                                       |                  |                        |                            |            |                      |                          |  |      |              |                        |                            |            |                      |                          |        |       |      |       |       |      |        |      |       |      |        |       |      |        |       |       |      |       |       |      |        |
|-------------|----------------------------------|---------------------------------------------------------------------------------------------------------------------------------------------------------------------------------------------------------------------------------------------------------------------------------------------------------------------------------------------------------------------------------------------------------------------------------------------------------------------------------------------------------------------------------------------------------------------------------------------------------------------------------------------------------------------------------|------------------|------------------------|----------------------------|------------|----------------------|--------------------------|--|------|--------------|------------------------|----------------------------|------------|----------------------|--------------------------|--------|-------|------|-------|-------|------|--------|------|-------|------|--------|-------|------|--------|-------|-------|------|-------|-------|------|--------|
| <b>PJ34</b> |                                  | <table border="1"> <thead> <tr> <th colspan="7">Average Response</th> </tr> <tr> <th>Dose</th> <th>Green Signal</th> <th>Actual Pct Green Cells</th> <th>Normalized Pct Green Cells</th> <th>Red Signal</th> <th>Actual Pct Red Cells</th> <th>Normalized Pct Red Cells</th> </tr> </thead> <tbody> <tr> <td>0.1 uM</td> <td>88.44</td> <td>0.82</td> <td>85.13</td> <td>63.73</td> <td>0.02</td> <td>-55.43</td> </tr> <tr> <td>1 uM</td> <td>82.67</td> <td>0.70</td> <td>-13.44</td> <td>72.14</td> <td>0.03</td> <td>-54.94</td> </tr> <tr> <td>10 uM</td> <td>90.84</td> <td>0.80</td> <td>29.46</td> <td>98.96</td> <td>0.08</td> <td>-19.45</td> </tr> </tbody> </table> | Average Response |                        |                            |            |                      |                          |  | Dose | Green Signal | Actual Pct Green Cells | Normalized Pct Green Cells | Red Signal | Actual Pct Red Cells | Normalized Pct Red Cells | 0.1 uM | 88.44 | 0.82 | 85.13 | 63.73 | 0.02 | -55.43 | 1 uM | 82.67 | 0.70 | -13.44 | 72.14 | 0.03 | -54.94 | 10 uM | 90.84 | 0.80 | 29.46 | 98.96 | 0.08 | -19.45 |
|             |                                  | Average Response                                                                                                                                                                                                                                                                                                                                                                                                                                                                                                                                                                                                                                                                |                  |                        |                            |            |                      |                          |  |      |              |                        |                            |            |                      |                          |        |       |      |       |       |      |        |      |       |      |        |       |      |        |       |       |      |       |       |      |        |
|             |                                  | Dose                                                                                                                                                                                                                                                                                                                                                                                                                                                                                                                                                                                                                                                                            | Green Signal     | Actual Pct Green Cells | Normalized Pct Green Cells | Red Signal | Actual Pct Red Cells | Normalized Pct Red Cells |  |      |              |                        |                            |            |                      |                          |        |       |      |       |       |      |        |      |       |      |        |       |      |        |       |       |      |       |       |      |        |
|             |                                  | 0.1 uM                                                                                                                                                                                                                                                                                                                                                                                                                                                                                                                                                                                                                                                                          | 88.44            | 0.82                   | 85.13                      | 63.73      | 0.02                 | -55.43                   |  |      |              |                        |                            |            |                      |                          |        |       |      |       |       |      |        |      |       |      |        |       |      |        |       |       |      |       |       |      |        |
| 1 uM        | 82.67                            | 0.70                                                                                                                                                                                                                                                                                                                                                                                                                                                                                                                                                                                                                                                                            | -13.44           | 72.14                  | 0.03                       | -54.94     |                      |                          |  |      |              |                        |                            |            |                      |                          |        |       |      |       |       |      |        |      |       |      |        |       |      |        |       |       |      |       |       |      |        |
| 10 uM       | 90.84                            | 0.80                                                                                                                                                                                                                                                                                                                                                                                                                                                                                                                                                                                                                                                                            | 29.46            | 98.96                  | 0.08                       | -19.45     |                      |                          |  |      |              |                        |                            |            |                      |                          |        |       |      |       |       |      |        |      |       |      |        |       |      |        |       |       |      |       |       |      |        |

| Compound                     | Normalized Values (A and B Sets) | Responses                                                                                                                                                                                                                                                                                                                                                                                                                                                                                                                                                                                                                                                                        |                  |                        |                            |            |                      |                          |  |      |              |                        |                            |            |                      |                          |        |        |      |       |       |      |        |      |        |      |        |        |      |       |       |       |      |        |       |      |      |
|------------------------------|----------------------------------|----------------------------------------------------------------------------------------------------------------------------------------------------------------------------------------------------------------------------------------------------------------------------------------------------------------------------------------------------------------------------------------------------------------------------------------------------------------------------------------------------------------------------------------------------------------------------------------------------------------------------------------------------------------------------------|------------------|------------------------|----------------------------|------------|----------------------|--------------------------|--|------|--------------|------------------------|----------------------------|------------|----------------------|--------------------------|--------|--------|------|-------|-------|------|--------|------|--------|------|--------|--------|------|-------|-------|-------|------|--------|-------|------|------|
| <b>Plinabulin (NPI-2358)</b> |                                  | <table border="1"> <thead> <tr> <th colspan="7">Average Response</th> </tr> <tr> <th>Dose</th> <th>Green Signal</th> <th>Actual Pct Green Cells</th> <th>Normalized Pct Green Cells</th> <th>Red Signal</th> <th>Actual Pct Red Cells</th> <th>Normalized Pct Red Cells</th> </tr> </thead> <tbody> <tr> <td>0.1 uM</td> <td>119.70</td> <td>0.89</td> <td>98.16</td> <td>91.02</td> <td>0.08</td> <td>-30.68</td> </tr> <tr> <td>1 uM</td> <td>108.86</td> <td>0.78</td> <td>-65.03</td> <td>121.19</td> <td>0.17</td> <td>21.88</td> </tr> <tr> <td>10 uM</td> <td>93.88</td> <td>0.65</td> <td>-46.63</td> <td>98.78</td> <td>0.12</td> <td>1.23</td> </tr> </tbody> </table> | Average Response |                        |                            |            |                      |                          |  | Dose | Green Signal | Actual Pct Green Cells | Normalized Pct Green Cells | Red Signal | Actual Pct Red Cells | Normalized Pct Red Cells | 0.1 uM | 119.70 | 0.89 | 98.16 | 91.02 | 0.08 | -30.68 | 1 uM | 108.86 | 0.78 | -65.03 | 121.19 | 0.17 | 21.88 | 10 uM | 93.88 | 0.65 | -46.63 | 98.78 | 0.12 | 1.23 |
|                              |                                  | Average Response                                                                                                                                                                                                                                                                                                                                                                                                                                                                                                                                                                                                                                                                 |                  |                        |                            |            |                      |                          |  |      |              |                        |                            |            |                      |                          |        |        |      |       |       |      |        |      |        |      |        |        |      |       |       |       |      |        |       |      |      |
|                              |                                  | Dose                                                                                                                                                                                                                                                                                                                                                                                                                                                                                                                                                                                                                                                                             | Green Signal     | Actual Pct Green Cells | Normalized Pct Green Cells | Red Signal | Actual Pct Red Cells | Normalized Pct Red Cells |  |      |              |                        |                            |            |                      |                          |        |        |      |       |       |      |        |      |        |      |        |        |      |       |       |       |      |        |       |      |      |
|                              |                                  | 0.1 uM                                                                                                                                                                                                                                                                                                                                                                                                                                                                                                                                                                                                                                                                           | 119.70           | 0.89                   | 98.16                      | 91.02      | 0.08                 | -30.68                   |  |      |              |                        |                            |            |                      |                          |        |        |      |       |       |      |        |      |        |      |        |        |      |       |       |       |      |        |       |      |      |
| 1 uM                         | 108.86                           | 0.78                                                                                                                                                                                                                                                                                                                                                                                                                                                                                                                                                                                                                                                                             | -65.03           | 121.19                 | 0.17                       | 21.88      |                      |                          |  |      |              |                        |                            |            |                      |                          |        |        |      |       |       |      |        |      |        |      |        |        |      |       |       |       |      |        |       |      |      |
| 10 uM                        | 93.88                            | 0.65                                                                                                                                                                                                                                                                                                                                                                                                                                                                                                                                                                                                                                                                             | -46.63           | 98.78                  | 0.12                       | 1.23       |                      |                          |  |      |              |                        |                            |            |                      |                          |        |        |      |       |       |      |        |      |        |      |        |        |      |       |       |       |      |        |       |      |      |

| Compound                       | Normalized Values (A and B Sets) | Responses                                                                                                                                                                                                                                                                                                                                                                                                                                                                                                                                                                                                                                                                         |                  |                        |                            |            |                      |                          |  |      |              |                        |                            |            |                      |                          |        |       |      |        |       |      |        |      |       |      |        |       |      |        |       |       |      |        |       |      |        |
|--------------------------------|----------------------------------|-----------------------------------------------------------------------------------------------------------------------------------------------------------------------------------------------------------------------------------------------------------------------------------------------------------------------------------------------------------------------------------------------------------------------------------------------------------------------------------------------------------------------------------------------------------------------------------------------------------------------------------------------------------------------------------|------------------|------------------------|----------------------------|------------|----------------------|--------------------------|--|------|--------------|------------------------|----------------------------|------------|----------------------|--------------------------|--------|-------|------|--------|-------|------|--------|------|-------|------|--------|-------|------|--------|-------|-------|------|--------|-------|------|--------|
| <b>PluriSIn #1 (NSC 14613)</b> |                                  | <table border="1"> <thead> <tr> <th colspan="7">Average Response</th> </tr> <tr> <th>Dose</th> <th>Green Signal</th> <th>Actual Pct Green Cells</th> <th>Normalized Pct Green Cells</th> <th>Red Signal</th> <th>Actual Pct Red Cells</th> <th>Normalized Pct Red Cells</th> </tr> </thead> <tbody> <tr> <td>0.1 uM</td> <td>97.23</td> <td>0.90</td> <td>108.06</td> <td>66.95</td> <td>0.02</td> <td>-61.22</td> </tr> <tr> <td>1 uM</td> <td>81.05</td> <td>0.75</td> <td>123.05</td> <td>66.62</td> <td>0.02</td> <td>-34.80</td> </tr> <tr> <td>10 uM</td> <td>80.69</td> <td>0.72</td> <td>-80.14</td> <td>76.59</td> <td>0.03</td> <td>-36.49</td> </tr> </tbody> </table> | Average Response |                        |                            |            |                      |                          |  | Dose | Green Signal | Actual Pct Green Cells | Normalized Pct Green Cells | Red Signal | Actual Pct Red Cells | Normalized Pct Red Cells | 0.1 uM | 97.23 | 0.90 | 108.06 | 66.95 | 0.02 | -61.22 | 1 uM | 81.05 | 0.75 | 123.05 | 66.62 | 0.02 | -34.80 | 10 uM | 80.69 | 0.72 | -80.14 | 76.59 | 0.03 | -36.49 |
|                                |                                  | Average Response                                                                                                                                                                                                                                                                                                                                                                                                                                                                                                                                                                                                                                                                  |                  |                        |                            |            |                      |                          |  |      |              |                        |                            |            |                      |                          |        |       |      |        |       |      |        |      |       |      |        |       |      |        |       |       |      |        |       |      |        |
|                                |                                  | Dose                                                                                                                                                                                                                                                                                                                                                                                                                                                                                                                                                                                                                                                                              | Green Signal     | Actual Pct Green Cells | Normalized Pct Green Cells | Red Signal | Actual Pct Red Cells | Normalized Pct Red Cells |  |      |              |                        |                            |            |                      |                          |        |       |      |        |       |      |        |      |       |      |        |       |      |        |       |       |      |        |       |      |        |
|                                |                                  | 0.1 uM                                                                                                                                                                                                                                                                                                                                                                                                                                                                                                                                                                                                                                                                            | 97.23            | 0.90                   | 108.06                     | 66.95      | 0.02                 | -61.22                   |  |      |              |                        |                            |            |                      |                          |        |       |      |        |       |      |        |      |       |      |        |       |      |        |       |       |      |        |       |      |        |
| 1 uM                           | 81.05                            | 0.75                                                                                                                                                                                                                                                                                                                                                                                                                                                                                                                                                                                                                                                                              | 123.05           | 66.62                  | 0.02                       | -34.80     |                      |                          |  |      |              |                        |                            |            |                      |                          |        |       |      |        |       |      |        |      |       |      |        |       |      |        |       |       |      |        |       |      |        |
| 10 uM                          | 80.69                            | 0.72                                                                                                                                                                                                                                                                                                                                                                                                                                                                                                                                                                                                                                                                              | -80.14           | 76.59                  | 0.03                       | -36.49     |                      |                          |  |      |              |                        |                            |            |                      |                          |        |       |      |        |       |      |        |      |       |      |        |       |      |        |       |       |      |        |       |      |        |

| Compound    | Normalized Values (A and B Sets) | Responses                                                                                                                                                                                                                                                                                                                                                                                                                                                                                                                                                                                                                                                                      |                  |                        |                            |            |                      |                          |  |      |              |                        |                            |            |                      |                          |        |       |      |        |       |      |        |      |       |      |       |       |      |        |       |       |      |      |       |      |        |
|-------------|----------------------------------|--------------------------------------------------------------------------------------------------------------------------------------------------------------------------------------------------------------------------------------------------------------------------------------------------------------------------------------------------------------------------------------------------------------------------------------------------------------------------------------------------------------------------------------------------------------------------------------------------------------------------------------------------------------------------------|------------------|------------------------|----------------------------|------------|----------------------|--------------------------|--|------|--------------|------------------------|----------------------------|------------|----------------------|--------------------------|--------|-------|------|--------|-------|------|--------|------|-------|------|-------|-------|------|--------|-------|-------|------|------|-------|------|--------|
| <b>PMSF</b> |                                  | <table border="1"> <thead> <tr> <th colspan="7">Average Response</th> </tr> <tr> <th>Dose</th> <th>Green Signal</th> <th>Actual Pct Green Cells</th> <th>Normalized Pct Green Cells</th> <th>Red Signal</th> <th>Actual Pct Red Cells</th> <th>Normalized Pct Red Cells</th> </tr> </thead> <tbody> <tr> <td>0.1 uM</td> <td>87.82</td> <td>0.80</td> <td>129.95</td> <td>86.07</td> <td>0.05</td> <td>-39.30</td> </tr> <tr> <td>1 uM</td> <td>90.36</td> <td>0.76</td> <td>29.72</td> <td>82.28</td> <td>0.05</td> <td>-41.65</td> </tr> <tr> <td>10 uM</td> <td>92.83</td> <td>0.81</td> <td>5.71</td> <td>61.48</td> <td>0.01</td> <td>-56.87</td> </tr> </tbody> </table> | Average Response |                        |                            |            |                      |                          |  | Dose | Green Signal | Actual Pct Green Cells | Normalized Pct Green Cells | Red Signal | Actual Pct Red Cells | Normalized Pct Red Cells | 0.1 uM | 87.82 | 0.80 | 129.95 | 86.07 | 0.05 | -39.30 | 1 uM | 90.36 | 0.76 | 29.72 | 82.28 | 0.05 | -41.65 | 10 uM | 92.83 | 0.81 | 5.71 | 61.48 | 0.01 | -56.87 |
|             |                                  | Average Response                                                                                                                                                                                                                                                                                                                                                                                                                                                                                                                                                                                                                                                               |                  |                        |                            |            |                      |                          |  |      |              |                        |                            |            |                      |                          |        |       |      |        |       |      |        |      |       |      |       |       |      |        |       |       |      |      |       |      |        |
|             |                                  | Dose                                                                                                                                                                                                                                                                                                                                                                                                                                                                                                                                                                                                                                                                           | Green Signal     | Actual Pct Green Cells | Normalized Pct Green Cells | Red Signal | Actual Pct Red Cells | Normalized Pct Red Cells |  |      |              |                        |                            |            |                      |                          |        |       |      |        |       |      |        |      |       |      |       |       |      |        |       |       |      |      |       |      |        |
|             |                                  | 0.1 uM                                                                                                                                                                                                                                                                                                                                                                                                                                                                                                                                                                                                                                                                         | 87.82            | 0.80                   | 129.95                     | 86.07      | 0.05                 | -39.30                   |  |      |              |                        |                            |            |                      |                          |        |       |      |        |       |      |        |      |       |      |       |       |      |        |       |       |      |      |       |      |        |
| 1 uM        | 90.36                            | 0.76                                                                                                                                                                                                                                                                                                                                                                                                                                                                                                                                                                                                                                                                           | 29.72            | 82.28                  | 0.05                       | -41.65     |                      |                          |  |      |              |                        |                            |            |                      |                          |        |       |      |        |       |      |        |      |       |      |       |       |      |        |       |       |      |      |       |      |        |
| 10 uM       | 92.83                            | 0.81                                                                                                                                                                                                                                                                                                                                                                                                                                                                                                                                                                                                                                                                           | 5.71             | 61.48                  | 0.01                       | -56.87     |                      |                          |  |      |              |                        |                            |            |                      |                          |        |       |      |        |       |      |        |      |       |      |       |       |      |        |       |       |      |      |       |      |        |



Compound

Normalized Values (A and B Sets)

Responses

|                   |       |                         |              |                        |                            |            |                      |                          |
|-------------------|-------|-------------------------|--------------|------------------------|----------------------------|------------|----------------------|--------------------------|
| <b>PNU-120596</b> |       | <b>Average Response</b> |              |                        |                            |            |                      |                          |
|                   |       | Dose                    | Green Signal | Actual Pct Green Cells | Normalized Pct Green Cells | Red Signal | Actual Pct Red Cells | Normalized Pct Red Cells |
|                   |       | 0.1 uM                  | 107.40       | 0.95                   | 158.14                     | 96.22      | 0.09                 | -13.12                   |
|                   |       | 1 uM                    | 90.04        | 0.76                   | 30.99                      | 79.37      | 0.04                 | -39.02                   |
| 10 uM             | 92.93 | 0.90                    | 47.69        | 106.55                 | 0.10                       | -11.56     |                      |                          |

Compound

Normalized Values (A and B Sets)

Responses

|                     |        |                         |              |                        |                            |            |                      |                          |
|---------------------|--------|-------------------------|--------------|------------------------|----------------------------|------------|----------------------|--------------------------|
| <b>Pomalidomide</b> |        | <b>Average Response</b> |              |                        |                            |            |                      |                          |
|                     |        | Dose                    | Green Signal | Actual Pct Green Cells | Normalized Pct Green Cells | Red Signal | Actual Pct Red Cells | Normalized Pct Red Cells |
|                     |        | 0.1 uM                  | 116.72       | 0.95                   | 132.82                     | 93.00      | 0.05                 | -45.70                   |
|                     |        | 1 uM                    | 112.75       | 0.91                   | 139.30                     | 103.69     | 0.09                 | -14.96                   |
| 10 uM               | 108.80 | 0.88                    | 100.90       | 108.32                 | 0.10                       | -7.09      |                      |                          |

Compound

Normalized Values (A and B Sets)

Responses

|                            |       |                         |              |                        |                            |            |                      |                          |
|----------------------------|-------|-------------------------|--------------|------------------------|----------------------------|------------|----------------------|--------------------------|
| <b>Ponatinib (AP24534)</b> |       | <b>Average Response</b> |              |                        |                            |            |                      |                          |
|                            |       | Dose                    | Green Signal | Actual Pct Green Cells | Normalized Pct Green Cells | Red Signal | Actual Pct Red Cells | Normalized Pct Red Cells |
|                            |       | 0.1 uM                  | 96.38        | 0.84                   | -5.20                      | 139.01     | 0.26                 | 69.46                    |
|                            |       | 1 uM                    | 106.62       | 0.80                   | -25.68                     | 99.93      | 0.14                 | 7.03                     |
| 10 uM                      | 99.33 | 0.87                    | 95.92        | 93.37                  | 0.03                       | -39.36     |                      |                          |

Compound

Normalized Values (A and B Sets)

Responses

|                     |        |                         |              |                        |                            |            |                      |                          |
|---------------------|--------|-------------------------|--------------|------------------------|----------------------------|------------|----------------------|--------------------------|
| <b>Posaconazole</b> |        | <b>Average Response</b> |              |                        |                            |            |                      |                          |
|                     |        | Dose                    | Green Signal | Actual Pct Green Cells | Normalized Pct Green Cells | Red Signal | Actual Pct Red Cells | Normalized Pct Red Cells |
|                     |        | 0.1 uM                  | 95.23        | 0.86                   | 87.15                      | 88.32      | 0.04                 | -54.26                   |
|                     |        | 1 uM                    | 84.43        | 0.76                   | 19.85                      | 69.95      | 0.01                 | -52.51                   |
| 10 uM               | 108.66 | 0.90                    | 116.26       | 97.25                  | 0.04                       | -38.03     |                      |                          |

Compound

Normalized Values (A and B Sets)

Responses

|                         |        |                         |              |                        |                            |            |                      |                          |
|-------------------------|--------|-------------------------|--------------|------------------------|----------------------------|------------|----------------------|--------------------------|
| <b>Potassium Iodide</b> |        | <b>Average Response</b> |              |                        |                            |            |                      |                          |
|                         |        | Dose                    | Green Signal | Actual Pct Green Cells | Normalized Pct Green Cells | Red Signal | Actual Pct Red Cells | Normalized Pct Red Cells |
|                         |        | 0.1 uM                  | 105.63       | 0.90                   | 77.01                      | 109.67     | 0.16                 | 0.83                     |
|                         |        | 1 uM                    | 99.58        | 0.83                   | -14.62                     | 84.31      | 0.05                 | -35.61                   |
| 10 uM                   | 106.96 | 0.88                    | 102.71       | 115.84                 | 0.14                       | -0.53      |                      |                          |

Compound

Normalized Values (A and B Sets)

Responses

| PP1 | Percent Green Cells (AB) |  | Percent Red Cells (AB) |  | Average Response |              |                        |                            |            |                      |                          |
|-----|--------------------------|--|------------------------|--|------------------|--------------|------------------------|----------------------------|------------|----------------------|--------------------------|
|     | Percent Response         |  | Percent Response       |  | Dose             | Green Signal | Actual Pct Green Cells | Normalized Pct Green Cells | Red Signal | Actual Pct Red Cells | Normalized Pct Red Cells |
|     | 100                      |  | 100                    |  | 0.1 uM           | 99.79        | 0.91                   | 180.25                     | 97.44      | 0.11                 | -7.07                    |
|     | 0                        |  | 0                      |  | 1 uM             | 83.10        | 0.68                   | -34.58                     | 80.17      | 0.05                 | -41.99                   |
|     | 0.1 uM                   |  | 0.1 uM                 |  | 10 uM            | 98.80        | 0.88                   | 108.84                     | 95.18      | 0.10                 | -9.70                    |
|     | 1 uM                     |  | 1 uM                   |  |                  |              |                        |                            |            |                      |                          |
|     | 10 uM                    |  | 10 uM                  |  |                  |              |                        |                            |            |                      |                          |

Compound

Normalized Values (A and B Sets)

Responses

| PP2 | Percent Green Cells (AB) |  | Percent Red Cells (AB) |  | Average Response |              |                        |                            |            |                      |                          |
|-----|--------------------------|--|------------------------|--|------------------|--------------|------------------------|----------------------------|------------|----------------------|--------------------------|
|     | Percent Response         |  | Percent Response       |  | Dose             | Green Signal | Actual Pct Green Cells | Normalized Pct Green Cells | Red Signal | Actual Pct Red Cells | Normalized Pct Red Cells |
|     | 100                      |  | 100                    |  | 0.1 uM           | 93.06        | 0.89                   | 104.86                     | 104.02     | 0.10                 | -9.43                    |
|     | 0                        |  | 0                      |  | 1 uM             | 86.58        | 0.82                   | 158.10                     | 91.89      | 0.08                 | -7.77                    |
|     | 0.1 uM                   |  | 0.1 uM                 |  | 10 uM            | 89.23        | 0.86                   | 49.02                      | 78.32      | 0.05                 | -30.89                   |
|     | 1 uM                     |  | 1 uM                   |  |                  |              |                        |                            |            |                      |                          |
|     | 10 uM                    |  | 10 uM                  |  |                  |              |                        |                            |            |                      |                          |

Compound

Normalized Values (A and B Sets)

Responses

| PP242 | Percent Green Cells (AB) |  | Percent Red Cells (AB) |  | Average Response |              |                        |                            |            |                      |                          |
|-------|--------------------------|--|------------------------|--|------------------|--------------|------------------------|----------------------------|------------|----------------------|--------------------------|
|       | Percent Response         |  | Percent Response       |  | Dose             | Green Signal | Actual Pct Green Cells | Normalized Pct Green Cells | Red Signal | Actual Pct Red Cells | Normalized Pct Red Cells |
|       | 100                      |  | 100                    |  | 0.1 uM           | 82.06        | 0.77                   | -30.63                     | 75.93      | 0.03                 | -41.98                   |
|       | 0                        |  | 0                      |  | 1 uM             | 97.40        | 0.89                   | 102.03                     | 79.92      | 0.03                 | -40.69                   |
|       | 0.1 uM                   |  | 0.1 uM                 |  | 10 uM            | 101.12       | 0.95                   | 460.03                     | 82.24      | 0.03                 | -44.55                   |
|       | 1 uM                     |  | 1 uM                   |  |                  |              |                        |                            |            |                      |                          |
|       | 10 uM                    |  | 10 uM                  |  |                  |              |                        |                            |            |                      |                          |

Compound

Normalized Values (A and B Sets)

Responses

| Pracinostat (SB939) | Percent Green Cells (AB) |  | Percent Red Cells (AB) |  | Average Response |              |                        |                            |            |                      |                          |
|---------------------|--------------------------|--|------------------------|--|------------------|--------------|------------------------|----------------------------|------------|----------------------|--------------------------|
|                     | Percent Response         |  | Percent Response       |  | Dose             | Green Signal | Actual Pct Green Cells | Normalized Pct Green Cells | Red Signal | Actual Pct Red Cells | Normalized Pct Red Cells |
|                     | 100                      |  | 100                    |  | 0.1 uM           | 93.29        | 0.81                   | 25.22                      | 89.87      | 0.06                 | -43.99                   |
|                     | 0                        |  | 0                      |  | 1 uM             | 105.67       | 0.81                   | 5.93                       | 142.80     | 0.27                 | 66.37                    |
|                     | 0.1 uM                   |  | 0.1 uM                 |  | 10 uM            | 120.57       | 0.92                   | 126.37                     | 136.48     | 0.19                 | 34.85                    |
|                     | 1 uM                     |  | 1 uM                   |  |                  |              |                        |                            |            |                      |                          |
|                     | 10 uM                    |  | 10 uM                  |  |                  |              |                        |                            |            |                      |                          |

Compound

Normalized Values (A and B Sets)

Responses

| Pramipexole 2HCl Monohydrate | Percent Green Cells (AB) |  | Percent Red Cells (AB) |  | Average Response |              |                        |                            |            |                      |                          |
|------------------------------|--------------------------|--|------------------------|--|------------------|--------------|------------------------|----------------------------|------------|----------------------|--------------------------|
|                              | Percent Response         |  | Percent Response       |  | Dose             | Green Signal | Actual Pct Green Cells | Normalized Pct Green Cells | Red Signal | Actual Pct Red Cells | Normalized Pct Red Cells |
|                              | 100                      |  | 100                    |  | 0.1 uM           | 101.29       | 0.90                   | 87.38                      | 97.37      | 0.07                 | -35.17                   |
|                              | 0                        |  | 0                      |  | 1 uM             | 107.18       | 0.90                   | 99.62                      | 95.22      | 0.09                 | -15.66                   |
|                              | 0.1 uM                   |  | 0.1 uM                 |  | 10 uM            | 109.30       | 0.85                   | 77.70                      | 108.34     | 0.09                 | -13.26                   |
|                              | 1 uM                     |  | 1 uM                   |  |                  |              |                        |                            |            |                      |                          |
|                              | 10 uM                    |  | 10 uM                  |  |                  |              |                        |                            |            |                      |                          |

Compound

Normalized Values (A and B Sets)

Responses

| Pramiracetam | Percent Green Cells (AB) |  | Percent Red Cells (AB)  |  | Average Response |              |                        |                            |            |                      |                          |
|--------------|--------------------------|--|-------------------------|--|------------------|--------------|------------------------|----------------------------|------------|----------------------|--------------------------|
|              | 100<br>Percent Response  |  | 100<br>Percent Response |  | Dose             | Green Signal | Actual Pct Green Cells | Normalized Pct Green Cells | Red Signal | Actual Pct Red Cells | Normalized Pct Red Cells |
|              | 0.1 uM                   |  | 1 uM                    |  | 0.1 uM           | 101.52       | 0.90                   | 98.00                      | 78.98      | 0.04                 | -35.19                   |
|              | concentration            |  | concentration           |  | 1 uM             | 90.84        | 0.76                   | 35.92                      | 100.89     | 0.12                 | -3.97                    |
|              |                          |  |                         |  | 10 uM            | 95.63        | 0.86                   | -63.11                     | 84.81      | 0.05                 | -35.20                   |

Compound

Normalized Values (A and B Sets)

Responses

| Pranlukast | Percent Green Cells (AB) |  | Percent Red Cells (AB)  |  | Average Response |              |                        |                            |            |                      |                          |
|------------|--------------------------|--|-------------------------|--|------------------|--------------|------------------------|----------------------------|------------|----------------------|--------------------------|
|            | 100<br>Percent Response  |  | 100<br>Percent Response |  | Dose             | Green Signal | Actual Pct Green Cells | Normalized Pct Green Cells | Red Signal | Actual Pct Red Cells | Normalized Pct Red Cells |
|            | 0.1 uM                   |  | 1 uM                    |  | 0.1 uM           | 98.81        | 0.90                   | 90.17                      | 93.79      | 0.05                 | -44.42                   |
|            | concentration            |  | concentration           |  | 1 uM             | 104.93       | 0.87                   | 82.64                      | 98.06      | 0.09                 | -18.48                   |
|            |                          |  |                         |  | 10 uM            | 109.90       | 0.89                   | 108.28                     | 111.31     | 0.09                 | -18.44                   |

Compound

Normalized Values (A and B Sets)

Responses

| Prasugrel | Percent Green Cells (AB) |  | Percent Red Cells (AB)  |  | Average Response |              |                        |                            |            |                      |                          |
|-----------|--------------------------|--|-------------------------|--|------------------|--------------|------------------------|----------------------------|------------|----------------------|--------------------------|
|           | 100<br>Percent Response  |  | 100<br>Percent Response |  | Dose             | Green Signal | Actual Pct Green Cells | Normalized Pct Green Cells | Red Signal | Actual Pct Red Cells | Normalized Pct Red Cells |
|           | 0.1 uM                   |  | 1 uM                    |  | 0.1 uM           | 99.00        | 0.89                   | 55.80                      | 82.50      | 0.02                 | -58.67                   |
|           | concentration            |  | concentration           |  | 1 uM             | 97.05        | 0.85                   | 66.72                      | 74.70      | 0.02                 | -48.96                   |
|           |                          |  |                         |  | 10 uM            | 85.86        | 0.77                   | 30.99                      | 86.38      | 0.03                 | -43.19                   |

Compound

Normalized Values (A and B Sets)

Responses

| Prednisolone Acetate | Percent Green Cells (AB) |  | Percent Red Cells (AB)  |  | Average Response |              |                        |                            |            |                      |                          |
|----------------------|--------------------------|--|-------------------------|--|------------------|--------------|------------------------|----------------------------|------------|----------------------|--------------------------|
|                      | 100<br>Percent Response  |  | 100<br>Percent Response |  | Dose             | Green Signal | Actual Pct Green Cells | Normalized Pct Green Cells | Red Signal | Actual Pct Red Cells | Normalized Pct Red Cells |
|                      | 0.1 uM                   |  | 1 uM                    |  | 0.1 uM           | 102.05       | 0.94                   | 146.48                     | 90.68      | 0.09                 | -16.92                   |
|                      | concentration            |  | concentration           |  | 1 uM             | 100.82       | 0.89                   | 101.85                     | 72.80      | 0.02                 | -47.37                   |
|                      |                          |  |                         |  | 10 uM            | 93.07        | 0.84                   | 210.34                     | 76.02      | 0.03                 | -46.17                   |

Compound

Normalized Values (A and B Sets)

Responses

| Prilocaine | Percent Green Cells (AB) |  | Percent Red Cells (AB)  |  | Average Response |              |                        |                            |            |                      |                          |
|------------|--------------------------|--|-------------------------|--|------------------|--------------|------------------------|----------------------------|------------|----------------------|--------------------------|
|            | 100<br>Percent Response  |  | 100<br>Percent Response |  | Dose             | Green Signal | Actual Pct Green Cells | Normalized Pct Green Cells | Red Signal | Actual Pct Red Cells | Normalized Pct Red Cells |
|            | 0.1 uM                   |  | 1 uM                    |  | 0.1 uM           | 87.10        | 0.78                   | -27.12                     | 81.58      | 0.03                 | -58.43                   |
|            | concentration            |  | concentration           |  | 1 uM             | 109.11       | 0.88                   | 112.54                     | 93.32      | 0.05                 | -33.38                   |
|            |                          |  |                         |  | 10 uM            | 111.42       | 0.87                   | 100.12                     | 130.41     | 0.17                 | 20.39                    |

Compound

Normalized Values (A and B Sets)

Responses

| Procodazole | Percent Green Cells (AB) |  | Percent Red Cells (AB) |  | Average Response |              |                        |                            |            |                      |                          |
|-------------|--------------------------|--|------------------------|--|------------------|--------------|------------------------|----------------------------|------------|----------------------|--------------------------|
|             | Percent Response         |  | Percent Response       |  | Dose             | Green Signal | Actual Pct Green Cells | Normalized Pct Green Cells | Red Signal | Actual Pct Red Cells | Normalized Pct Red Cells |
|             | 100                      |  | 100                    |  | 0.1 uM           | 99.66        | 0.89                   | 127.00                     | 74.09      | 0.02                 | -53.09                   |
|             | 0                        |  | 0                      |  | 1 uM             | 96.11        | 0.79                   | 47.03                      | 105.78     | 0.13                 | 0.13                     |
|             | 0.1 uM                   |  | 0.1 uM                 |  | 10 uM            | 96.36        | 0.84                   | 95.63                      | 80.12      | 0.04                 | -41.06                   |
|             | 1 uM                     |  | 1 uM                   |  |                  |              |                        |                            |            |                      |                          |
|             | 10 uM                    |  | 10 uM                  |  |                  |              |                        |                            |            |                      |                          |

Compound

Normalized Values (A and B Sets)

Responses

| Propafenone HCl | Percent Green Cells (AB) |  | Percent Red Cells (AB) |  | Average Response |              |                        |                            |            |                      |                          |
|-----------------|--------------------------|--|------------------------|--|------------------|--------------|------------------------|----------------------------|------------|----------------------|--------------------------|
|                 | Percent Response         |  | Percent Response       |  | Dose             | Green Signal | Actual Pct Green Cells | Normalized Pct Green Cells | Red Signal | Actual Pct Red Cells | Normalized Pct Red Cells |
|                 | 100                      |  | 100                    |  | 0.1 uM           | 109.55       | 0.92                   | 124.00                     | 98.78      | 0.11                 | -4.94                    |
|                 | 0                        |  | 0                      |  | 1 uM             | 110.24       | 0.86                   | 75.35                      | 82.95      | 0.06                 | -31.31                   |
|                 | 0.1 uM                   |  | 0.1 uM                 |  | 10 uM            | 104.21       | 0.93                   | 386.27                     | 86.23      | 0.05                 | -35.91                   |
|                 | 1 uM                     |  | 1 uM                   |  |                  |              |                        |                            |            |                      |                          |
|                 | 10 uM                    |  | 10 uM                  |  |                  |              |                        |                            |            |                      |                          |

Compound

Normalized Values (A and B Sets)

Responses

| PRT062607 (P505-15, BIIB057) HCl | Percent Green Cells (AB) |  | Percent Red Cells (AB) |  | Average Response |              |                        |                            |            |                      |                          |
|----------------------------------|--------------------------|--|------------------------|--|------------------|--------------|------------------------|----------------------------|------------|----------------------|--------------------------|
|                                  | Percent Response         |  | Percent Response       |  | Dose             | Green Signal | Actual Pct Green Cells | Normalized Pct Green Cells | Red Signal | Actual Pct Red Cells | Normalized Pct Red Cells |
|                                  | 100                      |  | 100                    |  | 0.1 uM           | 79.35        | 0.72                   | -46.86                     | 97.98      | 0.08                 | -23.98                   |
|                                  | 0                        |  | 0                      |  | 1 uM             | 94.61        | 0.87                   | 124.46                     | 88.36      | 0.07                 | -8.47                    |
|                                  | 0.1 uM                   |  | 0.1 uM                 |  | 10 uM            | 101.69       | 0.91                   | 95.79                      | 120.16     | 0.27                 | 69.91                    |
|                                  | 1 uM                     |  | 1 uM                   |  |                  |              |                        |                            |            |                      |                          |
|                                  | 10 uM                    |  | 10 uM                  |  |                  |              |                        |                            |            |                      |                          |

Compound

Normalized Values (A and B Sets)

Responses

| Prucalopride | Percent Green Cells (AB) |  | Percent Red Cells (AB) |  | Average Response |              |                        |                            |            |                      |                          |
|--------------|--------------------------|--|------------------------|--|------------------|--------------|------------------------|----------------------------|------------|----------------------|--------------------------|
|              | Percent Response         |  | Percent Response       |  | Dose             | Green Signal | Actual Pct Green Cells | Normalized Pct Green Cells | Red Signal | Actual Pct Red Cells | Normalized Pct Red Cells |
|              | 100                      |  | 100                    |  | 0.1 uM           | 91.71        | 0.85                   | 192.01                     | 97.75      | 0.12                 | -2.64                    |
|              | 0                        |  | 0                      |  | 1 uM             | 93.45        | 0.85                   | 93.13                      | 92.28      | 0.05                 | -41.96                   |
|              | 0.1 uM                   |  | 0.1 uM                 |  | 10 uM            | 88.68        | 0.80                   | 12.35                      | 63.31      | 0.01                 | -59.72                   |
|              | 1 uM                     |  | 1 uM                   |  |                  |              |                        |                            |            |                      |                          |
|              | 10 uM                    |  | 10 uM                  |  |                  |              |                        |                            |            |                      |                          |

Compound

Normalized Values (A and B Sets)

Responses

| Prucalopride Succinat | Percent Green Cells (AB) |  | Percent Red Cells (AB) |  | Average Response |              |                        |                            |            |                      |                          |
|-----------------------|--------------------------|--|------------------------|--|------------------|--------------|------------------------|----------------------------|------------|----------------------|--------------------------|
|                       | Percent Response         |  | Percent Response       |  | Dose             | Green Signal | Actual Pct Green Cells | Normalized Pct Green Cells | Red Signal | Actual Pct Red Cells | Normalized Pct Red Cells |
|                       | 100                      |  | 100                    |  | 0.1 uM           | 97.63        | 0.92                   | 188.61                     | 80.81      | 0.04                 | -45.82                   |
|                       | 0                        |  | 0                      |  | 1 uM             | 87.89        | 0.75                   | 18.25                      | 86.44      | 0.05                 | -39.62                   |
|                       | 0.1 uM                   |  | 0.1 uM                 |  | 10 uM            | 96.67        | 0.86                   | 58.41                      | 80.61      | 0.04                 | -43.36                   |
|                       | 1 uM                     |  | 1 uM                   |  |                  |              |                        |                            |            |                      |                          |
|                       | 10 uM                    |  | 10 uM                  |  |                  |              |                        |                            |            |                      |                          |

Compound

Normalized Values (A and B Sets)

Responses

| <b>PRX-08066 Maleic acid</b> |       | Average Response |              |                        |                            |            |                      |                          |
|------------------------------|-------|------------------|--------------|------------------------|----------------------------|------------|----------------------|--------------------------|
|                              |       | Dose             | Green Signal | Actual Pct Green Cells | Normalized Pct Green Cells | Red Signal | Actual Pct Red Cells | Normalized Pct Red Cells |
|                              |       | 0.1 uM           | 91.65        | 0.80                   | 21.82                      | 82.03      | 0.05                 | -45.75                   |
|                              |       | 1 uM             | 92.45        | 0.86                   | -20.14                     | 61.72      | 0.01                 | -42.32                   |
| 10 uM                        | 86.47 | 0.85             | 33.57        | 61.33                  | 0.01                       | -46.87     |                      |                          |

Compound

Normalized Values (A and B Sets)

Responses

| <b>Puerarin</b> |       | Average Response |              |                        |                            |            |                      |                          |
|-----------------|-------|------------------|--------------|------------------------|----------------------------|------------|----------------------|--------------------------|
|                 |       | Dose             | Green Signal | Actual Pct Green Cells | Normalized Pct Green Cells | Red Signal | Actual Pct Red Cells | Normalized Pct Red Cells |
|                 |       | 0.1 uM           | 84.39        | 0.83                   | 33.39                      | 95.09      | 0.08                 | -18.37                   |
|                 |       | 1 uM             | 88.81        | 0.75                   | 17.71                      | 86.06      | 0.06                 | -27.84                   |
| 10 uM           | 86.43 | 0.81             | -125.03      | 105.34                 | 0.11                       | -5.37      |                      |                          |

Compound

Normalized Values (A and B Sets)

Responses

| <b>Purmorphamine</b> |        | Average Response |              |                        |                            |            |                      |                          |
|----------------------|--------|------------------|--------------|------------------------|----------------------------|------------|----------------------|--------------------------|
|                      |        | Dose             | Green Signal | Actual Pct Green Cells | Normalized Pct Green Cells | Red Signal | Actual Pct Red Cells | Normalized Pct Red Cells |
|                      |        | 0.1 uM           | 91.75        | 0.85                   | 52.37                      | 97.35      | 0.12                 | -4.89                    |
|                      |        | 1 uM             | 87.49        | 0.71                   | -15.03                     | 99.67      | 0.13                 | -1.67                    |
| 10 uM                | 110.15 | 0.86             | 83.04        | 106.05                 | 0.17                       | 25.60      |                      |                          |

Compound

Normalized Values (A and B Sets)

Responses

| <b>PYR-41</b> |        | Average Response |              |                        |                            |            |                      |                          |
|---------------|--------|------------------|--------------|------------------------|----------------------------|------------|----------------------|--------------------------|
|               |        | Dose             | Green Signal | Actual Pct Green Cells | Normalized Pct Green Cells | Red Signal | Actual Pct Red Cells | Normalized Pct Red Cells |
|               |        | 0.1 uM           | 98.28        | 0.87                   | 43.38                      | 93.31      | 0.10                 | -14.87                   |
|               |        | 1 uM             | 76.65        | 0.61                   | -77.39                     | 87.46      | 0.06                 | -35.97                   |
| 10 uM         | 108.01 | 0.85             | 107.69       | 123.68                 | 0.21                       | 48.31      |                      |                          |

Compound

Normalized Values (A and B Sets)

Responses

| <b>Pyrilamine Maleate</b> |       | Average Response |              |                        |                            |            |                      |                          |
|---------------------------|-------|------------------|--------------|------------------------|----------------------------|------------|----------------------|--------------------------|
|                           |       | Dose             | Green Signal | Actual Pct Green Cells | Normalized Pct Green Cells | Red Signal | Actual Pct Red Cells | Normalized Pct Red Cells |
|                           |       | 0.1 uM           | 66.93        | 0.55                   | 1155.69                    | 84.58      | 0.06                 | -32.42                   |
| 1 uM                      | 98.63 | 0.88             | 110.79       | 94.79                  | 0.06                       | -34.78     |                      |                          |

| Compound | Normalized Values (A and B Sets) | Responses |        |      |        |       |      |        |
|----------|----------------------------------|-----------|--------|------|--------|-------|------|--------|
|          |                                  | 10 uM     | 104.93 | 0.87 | 101.17 | 75.28 | 0.03 | -45.62 |

| Compound          | Normalized Values (A and B Sets) | Responses               |              |                        |                            |            |                      |                          |
|-------------------|----------------------------------|-------------------------|--------------|------------------------|----------------------------|------------|----------------------|--------------------------|
| <b>Pyroxamide</b> |                                  | <b>Average Response</b> |              |                        |                            |            |                      |                          |
|                   |                                  | Dose                    | Green Signal | Actual Pct Green Cells | Normalized Pct Green Cells | Red Signal | Actual Pct Red Cells | Normalized Pct Red Cells |
|                   |                                  | 0.1 uM                  | 83.05        | 0.66                   | 122.05                     | 99.58      | 0.13                 | 5.15                     |
|                   |                                  | 1 uM                    | 91.68        | 0.81                   | 85.80                      | 63.16      | 0.01                 | -45.61                   |
| 10 uM             | 91.81                            | 0.87                    | 55.68        | 114.49                 | 0.17                       | 26.26      |                      |                          |

| Compound   | Normalized Values (A and B Sets) | Responses               |              |                        |                            |            |                      |                          |
|------------|----------------------------------|-------------------------|--------------|------------------------|----------------------------|------------|----------------------|--------------------------|
| <b>QNZ</b> |                                  | <b>Average Response</b> |              |                        |                            |            |                      |                          |
|            |                                  | Dose                    | Green Signal | Actual Pct Green Cells | Normalized Pct Green Cells | Red Signal | Actual Pct Red Cells | Normalized Pct Red Cells |
|            |                                  | 0.1 uM                  | 93.57        | 0.87                   | 85.46                      | 82.37      | 0.05                 | -45.94                   |
|            |                                  | 1 uM                    | 93.31        | 0.89                   | 89.77                      | 61.77      | 0.01                 | -43.32                   |
| 10 uM      | 89.86                            | 0.88                    | 62.89        | 59.09                  | 0.01                       | -47.49     |                      |                          |

| Compound                   | Normalized Values (A and B Sets) | Responses               |              |                        |                            |            |                      |                          |
|----------------------------|----------------------------------|-------------------------|--------------|------------------------|----------------------------|------------|----------------------|--------------------------|
| <b>Quercetin Dihydrate</b> |                                  | <b>Average Response</b> |              |                        |                            |            |                      |                          |
|                            |                                  | Dose                    | Green Signal | Actual Pct Green Cells | Normalized Pct Green Cells | Red Signal | Actual Pct Red Cells | Normalized Pct Red Cells |
|                            |                                  | 0.1 uM                  | 77.08        | 0.69                   | 121.08                     | 72.65      | 0.02                 | -43.65                   |
|                            |                                  | 1 uM                    | 99.86        | 0.86                   | 80.62                      | 77.77      | 0.03                 | -41.82                   |
| 10 uM                      | 97.27                            | 0.90                    | 166.36       | 81.08                  | 0.03                       | -45.59     |                      |                          |

| Compound                   | Normalized Values (A and B Sets) | Responses               |              |                        |                            |            |                      |                          |
|----------------------------|----------------------------------|-------------------------|--------------|------------------------|----------------------------|------------|----------------------|--------------------------|
| <b>Quetiapine Fumarate</b> |                                  | <b>Average Response</b> |              |                        |                            |            |                      |                          |
|                            |                                  | Dose                    | Green Signal | Actual Pct Green Cells | Normalized Pct Green Cells | Red Signal | Actual Pct Red Cells | Normalized Pct Red Cells |
|                            |                                  | 0.1 uM                  | 98.50        | 0.88                   | 92.84                      | 97.58      | 0.08                 | -37.16                   |
|                            |                                  | 1 uM                    | 69.74        | 0.50                   | 409.85                     | 98.73      | 0.08                 | -22.86                   |
| 10 uM                      | 103.46                           | 0.89                    | 101.33       | 94.41                  | 0.05                       | -28.01     |                      |                          |

| Compound                     | Normalized Values (A and B Sets) | Responses               |              |  |  |            |                      |
|------------------------------|----------------------------------|-------------------------|--------------|--|--|------------|----------------------|
| <b>Quinine HCl Dihydrate</b> |                                  | <b>Average Response</b> |              |  |  |            |                      |
|                              |                                  | Dose                    | Green Signal |  |  | Red Signal | Actual Pct Red Cells |

Compound

Normalized Values (A and B Sets)

Responses

| Compound |        |      | Average Response |              |                        |                            |            |                      |                          |
|----------|--------|------|------------------|--------------|------------------------|----------------------------|------------|----------------------|--------------------------|
|          |        |      | Dose             | Green Signal | Actual Pct Green Cells | Normalized Pct Green Cells | Red Signal | Actual Pct Red Cells | Normalized Pct Red Cells |
|          |        |      | 0.1 uM           | 98.84        | 0.84                   | 50.80                      | 94.32      | 0.09                 | -12.20                   |
|          |        |      | 1 uM             | 109.24       | 0.88                   | 96.13                      | 88.17      | 0.08                 | -21.70                   |
| 10 uM    | 101.29 | 0.91 | 205.14           | 100.53       | 0.10                   | -12.48                     |            |                      |                          |

Compound

Normalized Values (A and B Sets)

Responses

| Quizartinib (AC220) |        |      | Average Response |              |                        |                            |            |                      |                          |
|---------------------|--------|------|------------------|--------------|------------------------|----------------------------|------------|----------------------|--------------------------|
|                     |        |      | Dose             | Green Signal | Actual Pct Green Cells | Normalized Pct Green Cells | Red Signal | Actual Pct Red Cells | Normalized Pct Red Cells |
|                     |        |      | 0.1 uM           | 87.86        | 0.78                   | 14.07                      | 91.32      | 0.07                 | -41.94                   |
|                     |        |      | 1 uM             | 104.26       | 0.88                   | 101.29                     | 81.19      | 0.03                 | -44.42                   |
| 10 uM               | 100.33 | 0.86 | 83.85            | 104.39       | 0.07                   | -25.25                     |            |                      |                          |

Compound

Normalized Values (A and B Sets)

Responses

| R-(-)-Apomorphine HCl Hemihydrate |        |      | Average Response |              |                        |                            |            |                      |                          |
|-----------------------------------|--------|------|------------------|--------------|------------------------|----------------------------|------------|----------------------|--------------------------|
|                                   |        |      | Dose             | Green Signal | Actual Pct Green Cells | Normalized Pct Green Cells | Red Signal | Actual Pct Red Cells | Normalized Pct Red Cells |
|                                   |        |      | 0.1 uM           | 96.94        | 0.86                   | 38.93                      | 90.43      | 0.09                 | -19.66                   |
|                                   |        |      | 1 uM             | 100.42       | 0.84                   | 86.98                      | 95.72      | 0.09                 | -19.18                   |
| 10 uM                             | 114.10 | 0.91 | 127.80           | 109.63       | 0.18                   | 29.18                      |            |                      |                          |

Compound

Normalized Values (A and B Sets)

Responses

| R406  |        |      | Average Response |              |                        |                            |            |                      |                          |
|-------|--------|------|------------------|--------------|------------------------|----------------------------|------------|----------------------|--------------------------|
|       |        |      | Dose             | Green Signal | Actual Pct Green Cells | Normalized Pct Green Cells | Red Signal | Actual Pct Red Cells | Normalized Pct Red Cells |
|       |        |      | 0.1 uM           | 87.69        | 0.83                   | 31.38                      | 80.15      | 0.05                 | -31.25                   |
|       |        |      | 1 uM             | 90.75        | 0.79                   | 47.32                      | 72.47      | 0.02                 | -45.56                   |
| 10 uM | 104.59 | 0.82 | 396.97           | 108.54       | 0.18                   | 25.64                      |            |                      |                          |

Compound

Normalized Values (A and B Sets)

Responses

| R406 (free base) |        |      | Average Response |              |                        |                            |            |                      |                          |
|------------------|--------|------|------------------|--------------|------------------------|----------------------------|------------|----------------------|--------------------------|
|                  |        |      | Dose             | Green Signal | Actual Pct Green Cells | Normalized Pct Green Cells | Red Signal | Actual Pct Red Cells | Normalized Pct Red Cells |
|                  |        |      | 0.1 uM           | 96.10        | 0.84                   | 39.65                      | 86.13      | 0.04                 | -50.31                   |
|                  |        |      | 1 uM             | 96.84        | 0.79                   | -0.16                      | 99.34      | 0.08                 | -19.28                   |
| 10 uM            | 104.26 | 0.82 | 67.48            | 125.73       | 0.17                   | 17.52                      |            |                      |                          |



Compound

Normalized Values (A and B Sets)

Responses

| R428 (BGB324) | Percent Green Cells (AB) |   | Percent Red Cells (AB) |       | Average Response |              |                        |                            |            |                      |                          |
|---------------|--------------------------|---|------------------------|-------|------------------|--------------|------------------------|----------------------------|------------|----------------------|--------------------------|
|               | Percent Response         |   | Percent Response       |       | Dose             | Green Signal | Actual Pct Green Cells | Normalized Pct Green Cells | Red Signal | Actual Pct Red Cells | Normalized Pct Red Cells |
|               | 100                      |   | 100                    |       | 0.1 uM           | 101.97       | 0.92                   | 122.11                     | 90.47      | 0.08                 | -19.60                   |
|               | 0                        |   | 0                      |       | 1 uM             | 99.41        | 0.87                   | 85.12                      | 96.32      | 0.08                 | -21.83                   |
| 0             |                          | 0 |                        | 10 uM | 80.35            | 0.88         | -42.67                 | 81.74                      | 0.04       | -38.03               |                          |

Compound

Normalized Values (A and B Sets)

Responses

| R547 | Percent Green Cells (AB) |   | Percent Red Cells (AB) |       | Average Response |              |                        |                            |            |                      |                          |
|------|--------------------------|---|------------------------|-------|------------------|--------------|------------------------|----------------------------|------------|----------------------|--------------------------|
|      | Percent Response         |   | Percent Response       |       | Dose             | Green Signal | Actual Pct Green Cells | Normalized Pct Green Cells | Red Signal | Actual Pct Red Cells | Normalized Pct Red Cells |
|      | 100                      |   | 100                    |       | 0.1 uM           | 93.04        | 0.86                   | 71.55                      | 62.97      | 0.02                 | -47.27                   |
|      | 0                        |   | 0                      |       | 1 uM             | 85.54        | 0.70                   | 1.47                       | 99.58      | 0.11                 | -7.69                    |
| 0    |                          | 0 |                        | 10 uM | 88.64            | 0.77         | 393.16                 | 87.92                      | 0.04       | -37.52               |                          |

Compound

Normalized Values (A and B Sets)

Responses

| Ractopamine HCl | Percent Green Cells (AB) |    | Percent Red Cells (AB) |       | Average Response |              |                        |                            |            |                      |                          |
|-----------------|--------------------------|----|------------------------|-------|------------------|--------------|------------------------|----------------------------|------------|----------------------|--------------------------|
|                 | Percent Response         |    | Percent Response       |       | Dose             | Green Signal | Actual Pct Green Cells | Normalized Pct Green Cells | Red Signal | Actual Pct Red Cells | Normalized Pct Red Cells |
|                 | 100                      |    | 100                    |       | 0.1 uM           | 98.54        | 0.89                   | 130.69                     | 95.63      | 0.12                 | -1.37                    |
|                 | 75                       |    | 75                     |       | 1 uM             | 79.80        | 0.66                   | -51.21                     | 84.70      | 0.04                 | -45.91                   |
| 50              |                          | 50 |                        | 10 uM | 104.04           | 0.88         | 134.38                 | 97.91                      | 0.09       | -18.39               |                          |

Compound

Normalized Values (A and B Sets)

Responses

| RAF265 (CHIR-265) | Percent Green Cells (AB) |    | Percent Red Cells (AB) |       | Average Response |              |                        |                            |            |                      |                          |
|-------------------|--------------------------|----|------------------------|-------|------------------|--------------|------------------------|----------------------------|------------|----------------------|--------------------------|
|                   | Percent Response         |    | Percent Response       |       | Dose             | Green Signal | Actual Pct Green Cells | Normalized Pct Green Cells | Red Signal | Actual Pct Red Cells | Normalized Pct Red Cells |
|                   | 100                      |    | 100                    |       | 0.1 uM           | 90.73        | 0.87                   | 73.18                      | 71.33      | 0.02                 | -45.85                   |
|                   | 75                       |    | 75                     |       | 1 uM             | 85.21        | 0.77                   | 35.78                      | 81.71      | 0.04                 | -38.15                   |
| 50                |                          | 50 |                        | 10 uM | 96.74            | 0.86         | 162.65                 | 90.71                      | 0.10       | -9.66                |                          |

Compound

Normalized Values (A and B Sets)

Responses

| Raf265 derivative | Percent Green Cells (AB) |    | Percent Red Cells (AB) |       | Average Response |              |                        |                            |            |                      |                          |
|-------------------|--------------------------|----|------------------------|-------|------------------|--------------|------------------------|----------------------------|------------|----------------------|--------------------------|
|                   | Percent Response         |    | Percent Response       |       | Dose             | Green Signal | Actual Pct Green Cells | Normalized Pct Green Cells | Red Signal | Actual Pct Red Cells | Normalized Pct Red Cells |
|                   | 100                      |    | 100                    |       | 0.1 uM           | 97.24        | 0.89                   | 92.70                      | 105.26     | 0.12                 | -0.62                    |
|                   | 75                       |    | 75                     |       | 1 uM             | 88.33        | 0.78                   | 41.58                      | 74.70      | 0.02                 | -45.48                   |
| 50                |                          | 50 |                        | 10 uM | 91.39            | 0.90         | 198.19                 | 81.92                      | 0.05       | -33.07               |                          |

| Compound                     | Normalized Values (A and B Sets) | Responses                                                                                                                                                                                                                                                                                                                                                                                                                                                                                                                                                                                                                                                                        |                  |                        |                            |            |                      |                          |  |      |              |                        |                            |            |                      |                          |        |        |      |       |       |      |        |      |       |      |        |       |      |        |       |       |      |       |       |      |        |
|------------------------------|----------------------------------|----------------------------------------------------------------------------------------------------------------------------------------------------------------------------------------------------------------------------------------------------------------------------------------------------------------------------------------------------------------------------------------------------------------------------------------------------------------------------------------------------------------------------------------------------------------------------------------------------------------------------------------------------------------------------------|------------------|------------------------|----------------------------|------------|----------------------|--------------------------|--|------|--------------|------------------------|----------------------------|------------|----------------------|--------------------------|--------|--------|------|-------|-------|------|--------|------|-------|------|--------|-------|------|--------|-------|-------|------|-------|-------|------|--------|
| <b>Raltegravir (MK-0518)</b> |                                  | <table border="1"> <thead> <tr> <th colspan="7">Average Response</th> </tr> <tr> <th>Dose</th> <th>Green Signal</th> <th>Actual Pct Green Cells</th> <th>Normalized Pct Green Cells</th> <th>Red Signal</th> <th>Actual Pct Red Cells</th> <th>Normalized Pct Red Cells</th> </tr> </thead> <tbody> <tr> <td>0.1 uM</td> <td>104.41</td> <td>0.90</td> <td>92.67</td> <td>93.10</td> <td>0.07</td> <td>-34.36</td> </tr> <tr> <td>1 uM</td> <td>86.18</td> <td>0.72</td> <td>109.34</td> <td>95.05</td> <td>0.08</td> <td>-19.09</td> </tr> <tr> <td>10 uM</td> <td>99.55</td> <td>0.84</td> <td>76.04</td> <td>94.24</td> <td>0.05</td> <td>-32.19</td> </tr> </tbody> </table> | Average Response |                        |                            |            |                      |                          |  | Dose | Green Signal | Actual Pct Green Cells | Normalized Pct Green Cells | Red Signal | Actual Pct Red Cells | Normalized Pct Red Cells | 0.1 uM | 104.41 | 0.90 | 92.67 | 93.10 | 0.07 | -34.36 | 1 uM | 86.18 | 0.72 | 109.34 | 95.05 | 0.08 | -19.09 | 10 uM | 99.55 | 0.84 | 76.04 | 94.24 | 0.05 | -32.19 |
|                              |                                  | Average Response                                                                                                                                                                                                                                                                                                                                                                                                                                                                                                                                                                                                                                                                 |                  |                        |                            |            |                      |                          |  |      |              |                        |                            |            |                      |                          |        |        |      |       |       |      |        |      |       |      |        |       |      |        |       |       |      |       |       |      |        |
|                              |                                  | Dose                                                                                                                                                                                                                                                                                                                                                                                                                                                                                                                                                                                                                                                                             | Green Signal     | Actual Pct Green Cells | Normalized Pct Green Cells | Red Signal | Actual Pct Red Cells | Normalized Pct Red Cells |  |      |              |                        |                            |            |                      |                          |        |        |      |       |       |      |        |      |       |      |        |       |      |        |       |       |      |       |       |      |        |
|                              |                                  | 0.1 uM                                                                                                                                                                                                                                                                                                                                                                                                                                                                                                                                                                                                                                                                           | 104.41           | 0.90                   | 92.67                      | 93.10      | 0.07                 | -34.36                   |  |      |              |                        |                            |            |                      |                          |        |        |      |       |       |      |        |      |       |      |        |       |      |        |       |       |      |       |       |      |        |
| 1 uM                         | 86.18                            | 0.72                                                                                                                                                                                                                                                                                                                                                                                                                                                                                                                                                                                                                                                                             | 109.34           | 95.05                  | 0.08                       | -19.09     |                      |                          |  |      |              |                        |                            |            |                      |                          |        |        |      |       |       |      |        |      |       |      |        |       |      |        |       |       |      |       |       |      |        |
| 10 uM                        | 99.55                            | 0.84                                                                                                                                                                                                                                                                                                                                                                                                                                                                                                                                                                                                                                                                             | 76.04            | 94.24                  | 0.05                       | -32.19     |                      |                          |  |      |              |                        |                            |            |                      |                          |        |        |      |       |       |      |        |      |       |      |        |       |      |        |       |       |      |       |       |      |        |

| Compound           | Normalized Values (A and B Sets) | Responses                                                                                                                                                                                                                                                                                                                                                                                                                                                                                                                                                                                                                                                                          |                  |                        |                            |            |                      |                          |  |      |              |                        |                            |            |                      |                          |        |        |      |       |       |      |        |      |        |      |       |       |      |        |       |        |      |       |        |      |        |
|--------------------|----------------------------------|------------------------------------------------------------------------------------------------------------------------------------------------------------------------------------------------------------------------------------------------------------------------------------------------------------------------------------------------------------------------------------------------------------------------------------------------------------------------------------------------------------------------------------------------------------------------------------------------------------------------------------------------------------------------------------|------------------|------------------------|----------------------------|------------|----------------------|--------------------------|--|------|--------------|------------------------|----------------------------|------------|----------------------|--------------------------|--------|--------|------|-------|-------|------|--------|------|--------|------|-------|-------|------|--------|-------|--------|------|-------|--------|------|--------|
| <b>Raltitrexed</b> |                                  | <table border="1"> <thead> <tr> <th colspan="7">Average Response</th> </tr> <tr> <th>Dose</th> <th>Green Signal</th> <th>Actual Pct Green Cells</th> <th>Normalized Pct Green Cells</th> <th>Red Signal</th> <th>Actual Pct Red Cells</th> <th>Normalized Pct Red Cells</th> </tr> </thead> <tbody> <tr> <td>0.1 uM</td> <td>100.89</td> <td>0.88</td> <td>90.45</td> <td>83.82</td> <td>0.03</td> <td>-57.47</td> </tr> <tr> <td>1 uM</td> <td>106.11</td> <td>0.86</td> <td>73.92</td> <td>89.22</td> <td>0.05</td> <td>-32.81</td> </tr> <tr> <td>10 uM</td> <td>103.95</td> <td>0.86</td> <td>83.88</td> <td>109.11</td> <td>0.10</td> <td>-10.43</td> </tr> </tbody> </table> | Average Response |                        |                            |            |                      |                          |  | Dose | Green Signal | Actual Pct Green Cells | Normalized Pct Green Cells | Red Signal | Actual Pct Red Cells | Normalized Pct Red Cells | 0.1 uM | 100.89 | 0.88 | 90.45 | 83.82 | 0.03 | -57.47 | 1 uM | 106.11 | 0.86 | 73.92 | 89.22 | 0.05 | -32.81 | 10 uM | 103.95 | 0.86 | 83.88 | 109.11 | 0.10 | -10.43 |
|                    |                                  | Average Response                                                                                                                                                                                                                                                                                                                                                                                                                                                                                                                                                                                                                                                                   |                  |                        |                            |            |                      |                          |  |      |              |                        |                            |            |                      |                          |        |        |      |       |       |      |        |      |        |      |       |       |      |        |       |        |      |       |        |      |        |
|                    |                                  | Dose                                                                                                                                                                                                                                                                                                                                                                                                                                                                                                                                                                                                                                                                               | Green Signal     | Actual Pct Green Cells | Normalized Pct Green Cells | Red Signal | Actual Pct Red Cells | Normalized Pct Red Cells |  |      |              |                        |                            |            |                      |                          |        |        |      |       |       |      |        |      |        |      |       |       |      |        |       |        |      |       |        |      |        |
|                    |                                  | 0.1 uM                                                                                                                                                                                                                                                                                                                                                                                                                                                                                                                                                                                                                                                                             | 100.89           | 0.88                   | 90.45                      | 83.82      | 0.03                 | -57.47                   |  |      |              |                        |                            |            |                      |                          |        |        |      |       |       |      |        |      |        |      |       |       |      |        |       |        |      |       |        |      |        |
| 1 uM               | 106.11                           | 0.86                                                                                                                                                                                                                                                                                                                                                                                                                                                                                                                                                                                                                                                                               | 73.92            | 89.22                  | 0.05                       | -32.81     |                      |                          |  |      |              |                        |                            |            |                      |                          |        |        |      |       |       |      |        |      |        |      |       |       |      |        |       |        |      |       |        |      |        |
| 10 uM              | 103.95                           | 0.86                                                                                                                                                                                                                                                                                                                                                                                                                                                                                                                                                                                                                                                                               | 83.88            | 109.11                 | 0.10                       | -10.43     |                      |                          |  |      |              |                        |                            |            |                      |                          |        |        |      |       |       |      |        |      |        |      |       |       |      |        |       |        |      |       |        |      |        |

| Compound          | Normalized Values (A and B Sets) | Responses                                                                                                                                                                                                                                                                                                                                                                                                                                                                                                                                                                                                                                                                       |                  |                        |                            |            |                      |                          |  |      |              |                        |                            |            |                      |                          |        |       |      |       |       |      |        |      |       |      |        |        |      |       |       |       |      |       |       |      |        |
|-------------------|----------------------------------|---------------------------------------------------------------------------------------------------------------------------------------------------------------------------------------------------------------------------------------------------------------------------------------------------------------------------------------------------------------------------------------------------------------------------------------------------------------------------------------------------------------------------------------------------------------------------------------------------------------------------------------------------------------------------------|------------------|------------------------|----------------------------|------------|----------------------|--------------------------|--|------|--------------|------------------------|----------------------------|------------|----------------------|--------------------------|--------|-------|------|-------|-------|------|--------|------|-------|------|--------|--------|------|-------|-------|-------|------|-------|-------|------|--------|
| <b>Ranitidine</b> |                                  | <table border="1"> <thead> <tr> <th colspan="7">Average Response</th> </tr> <tr> <th>Dose</th> <th>Green Signal</th> <th>Actual Pct Green Cells</th> <th>Normalized Pct Green Cells</th> <th>Red Signal</th> <th>Actual Pct Red Cells</th> <th>Normalized Pct Red Cells</th> </tr> </thead> <tbody> <tr> <td>0.1 uM</td> <td>94.17</td> <td>0.84</td> <td>47.69</td> <td>89.33</td> <td>0.06</td> <td>-41.96</td> </tr> <tr> <td>1 uM</td> <td>94.12</td> <td>0.77</td> <td>115.48</td> <td>108.27</td> <td>0.11</td> <td>-6.25</td> </tr> <tr> <td>10 uM</td> <td>93.83</td> <td>0.78</td> <td>38.65</td> <td>86.36</td> <td>0.03</td> <td>-37.54</td> </tr> </tbody> </table> | Average Response |                        |                            |            |                      |                          |  | Dose | Green Signal | Actual Pct Green Cells | Normalized Pct Green Cells | Red Signal | Actual Pct Red Cells | Normalized Pct Red Cells | 0.1 uM | 94.17 | 0.84 | 47.69 | 89.33 | 0.06 | -41.96 | 1 uM | 94.12 | 0.77 | 115.48 | 108.27 | 0.11 | -6.25 | 10 uM | 93.83 | 0.78 | 38.65 | 86.36 | 0.03 | -37.54 |
|                   |                                  | Average Response                                                                                                                                                                                                                                                                                                                                                                                                                                                                                                                                                                                                                                                                |                  |                        |                            |            |                      |                          |  |      |              |                        |                            |            |                      |                          |        |       |      |       |       |      |        |      |       |      |        |        |      |       |       |       |      |       |       |      |        |
|                   |                                  | Dose                                                                                                                                                                                                                                                                                                                                                                                                                                                                                                                                                                                                                                                                            | Green Signal     | Actual Pct Green Cells | Normalized Pct Green Cells | Red Signal | Actual Pct Red Cells | Normalized Pct Red Cells |  |      |              |                        |                            |            |                      |                          |        |       |      |       |       |      |        |      |       |      |        |        |      |       |       |       |      |       |       |      |        |
|                   |                                  | 0.1 uM                                                                                                                                                                                                                                                                                                                                                                                                                                                                                                                                                                                                                                                                          | 94.17            | 0.84                   | 47.69                      | 89.33      | 0.06                 | -41.96                   |  |      |              |                        |                            |            |                      |                          |        |       |      |       |       |      |        |      |       |      |        |        |      |       |       |       |      |       |       |      |        |
| 1 uM              | 94.12                            | 0.77                                                                                                                                                                                                                                                                                                                                                                                                                                                                                                                                                                                                                                                                            | 115.48           | 108.27                 | 0.11                       | -6.25      |                      |                          |  |      |              |                        |                            |            |                      |                          |        |       |      |       |       |      |        |      |       |      |        |        |      |       |       |       |      |       |       |      |        |
| 10 uM             | 93.83                            | 0.78                                                                                                                                                                                                                                                                                                                                                                                                                                                                                                                                                                                                                                                                            | 38.65            | 86.36                  | 0.03                       | -37.54     |                      |                          |  |      |              |                        |                            |            |                      |                          |        |       |      |       |       |      |        |      |       |      |        |        |      |       |       |       |      |       |       |      |        |

| Compound               | Normalized Values (A and B Sets) | Responses                                                                                                                                                                                                                                                                                                                                                                                                                                                                                                                                                                                                                                                                         |                  |                        |                            |            |                      |                          |  |      |              |                        |                            |            |                      |                          |        |       |      |       |       |      |        |      |        |      |       |       |      |        |       |        |      |       |        |      |        |
|------------------------|----------------------------------|-----------------------------------------------------------------------------------------------------------------------------------------------------------------------------------------------------------------------------------------------------------------------------------------------------------------------------------------------------------------------------------------------------------------------------------------------------------------------------------------------------------------------------------------------------------------------------------------------------------------------------------------------------------------------------------|------------------|------------------------|----------------------------|------------|----------------------|--------------------------|--|------|--------------|------------------------|----------------------------|------------|----------------------|--------------------------|--------|-------|------|-------|-------|------|--------|------|--------|------|-------|-------|------|--------|-------|--------|------|-------|--------|------|--------|
| <b>Ranolazine 2HCl</b> |                                  | <table border="1"> <thead> <tr> <th colspan="7">Average Response</th> </tr> <tr> <th>Dose</th> <th>Green Signal</th> <th>Actual Pct Green Cells</th> <th>Normalized Pct Green Cells</th> <th>Red Signal</th> <th>Actual Pct Red Cells</th> <th>Normalized Pct Red Cells</th> </tr> </thead> <tbody> <tr> <td>0.1 uM</td> <td>95.82</td> <td>0.85</td> <td>59.47</td> <td>99.07</td> <td>0.08</td> <td>-33.43</td> </tr> <tr> <td>1 uM</td> <td>102.97</td> <td>0.87</td> <td>90.96</td> <td>89.14</td> <td>0.05</td> <td>-35.60</td> </tr> <tr> <td>10 uM</td> <td>102.54</td> <td>0.86</td> <td>91.44</td> <td>100.32</td> <td>0.05</td> <td>-30.86</td> </tr> </tbody> </table> | Average Response |                        |                            |            |                      |                          |  | Dose | Green Signal | Actual Pct Green Cells | Normalized Pct Green Cells | Red Signal | Actual Pct Red Cells | Normalized Pct Red Cells | 0.1 uM | 95.82 | 0.85 | 59.47 | 99.07 | 0.08 | -33.43 | 1 uM | 102.97 | 0.87 | 90.96 | 89.14 | 0.05 | -35.60 | 10 uM | 102.54 | 0.86 | 91.44 | 100.32 | 0.05 | -30.86 |
|                        |                                  | Average Response                                                                                                                                                                                                                                                                                                                                                                                                                                                                                                                                                                                                                                                                  |                  |                        |                            |            |                      |                          |  |      |              |                        |                            |            |                      |                          |        |       |      |       |       |      |        |      |        |      |       |       |      |        |       |        |      |       |        |      |        |
|                        |                                  | Dose                                                                                                                                                                                                                                                                                                                                                                                                                                                                                                                                                                                                                                                                              | Green Signal     | Actual Pct Green Cells | Normalized Pct Green Cells | Red Signal | Actual Pct Red Cells | Normalized Pct Red Cells |  |      |              |                        |                            |            |                      |                          |        |       |      |       |       |      |        |      |        |      |       |       |      |        |       |        |      |       |        |      |        |
|                        |                                  | 0.1 uM                                                                                                                                                                                                                                                                                                                                                                                                                                                                                                                                                                                                                                                                            | 95.82            | 0.85                   | 59.47                      | 99.07      | 0.08                 | -33.43                   |  |      |              |                        |                            |            |                      |                          |        |       |      |       |       |      |        |      |        |      |       |       |      |        |       |        |      |       |        |      |        |
| 1 uM                   | 102.97                           | 0.87                                                                                                                                                                                                                                                                                                                                                                                                                                                                                                                                                                                                                                                                              | 90.96            | 89.14                  | 0.05                       | -35.60     |                      |                          |  |      |              |                        |                            |            |                      |                          |        |       |      |       |       |      |        |      |        |      |       |       |      |        |       |        |      |       |        |      |        |
| 10 uM                  | 102.54                           | 0.86                                                                                                                                                                                                                                                                                                                                                                                                                                                                                                                                                                                                                                                                              | 91.44            | 100.32                 | 0.05                       | -30.86     |                      |                          |  |      |              |                        |                            |            |                      |                          |        |       |      |       |       |      |        |      |        |      |       |       |      |        |       |        |      |       |        |      |        |

| Compound                   | Normalized Values (A and B Sets) | Responses                                                                                                                                                                                                                                                                                                                                                                                                                                                                                                                                                                                                                                                                           |                  |                        |                            |            |                      |                          |  |      |              |                        |                            |            |                      |                          |        |        |      |       |        |      |        |      |        |      |       |       |      |        |       |        |      |       |        |      |        |
|----------------------------|----------------------------------|-------------------------------------------------------------------------------------------------------------------------------------------------------------------------------------------------------------------------------------------------------------------------------------------------------------------------------------------------------------------------------------------------------------------------------------------------------------------------------------------------------------------------------------------------------------------------------------------------------------------------------------------------------------------------------------|------------------|------------------------|----------------------------|------------|----------------------|--------------------------|--|------|--------------|------------------------|----------------------------|------------|----------------------|--------------------------|--------|--------|------|-------|--------|------|--------|------|--------|------|-------|-------|------|--------|-------|--------|------|-------|--------|------|--------|
| <b>Rasagiline Mesylate</b> |                                  | <table border="1"> <thead> <tr> <th colspan="7">Average Response</th> </tr> <tr> <th>Dose</th> <th>Green Signal</th> <th>Actual Pct Green Cells</th> <th>Normalized Pct Green Cells</th> <th>Red Signal</th> <th>Actual Pct Red Cells</th> <th>Normalized Pct Red Cells</th> </tr> </thead> <tbody> <tr> <td>0.1 uM</td> <td>112.76</td> <td>0.89</td> <td>81.73</td> <td>100.27</td> <td>0.10</td> <td>-19.52</td> </tr> <tr> <td>1 uM</td> <td>107.06</td> <td>0.88</td> <td>80.78</td> <td>97.50</td> <td>0.08</td> <td>-22.24</td> </tr> <tr> <td>10 uM</td> <td>103.89</td> <td>0.87</td> <td>95.97</td> <td>103.16</td> <td>0.07</td> <td>-23.63</td> </tr> </tbody> </table> | Average Response |                        |                            |            |                      |                          |  | Dose | Green Signal | Actual Pct Green Cells | Normalized Pct Green Cells | Red Signal | Actual Pct Red Cells | Normalized Pct Red Cells | 0.1 uM | 112.76 | 0.89 | 81.73 | 100.27 | 0.10 | -19.52 | 1 uM | 107.06 | 0.88 | 80.78 | 97.50 | 0.08 | -22.24 | 10 uM | 103.89 | 0.87 | 95.97 | 103.16 | 0.07 | -23.63 |
|                            |                                  | Average Response                                                                                                                                                                                                                                                                                                                                                                                                                                                                                                                                                                                                                                                                    |                  |                        |                            |            |                      |                          |  |      |              |                        |                            |            |                      |                          |        |        |      |       |        |      |        |      |        |      |       |       |      |        |       |        |      |       |        |      |        |
|                            |                                  | Dose                                                                                                                                                                                                                                                                                                                                                                                                                                                                                                                                                                                                                                                                                | Green Signal     | Actual Pct Green Cells | Normalized Pct Green Cells | Red Signal | Actual Pct Red Cells | Normalized Pct Red Cells |  |      |              |                        |                            |            |                      |                          |        |        |      |       |        |      |        |      |        |      |       |       |      |        |       |        |      |       |        |      |        |
|                            |                                  | 0.1 uM                                                                                                                                                                                                                                                                                                                                                                                                                                                                                                                                                                                                                                                                              | 112.76           | 0.89                   | 81.73                      | 100.27     | 0.10                 | -19.52                   |  |      |              |                        |                            |            |                      |                          |        |        |      |       |        |      |        |      |        |      |       |       |      |        |       |        |      |       |        |      |        |
| 1 uM                       | 107.06                           | 0.88                                                                                                                                                                                                                                                                                                                                                                                                                                                                                                                                                                                                                                                                                | 80.78            | 97.50                  | 0.08                       | -22.24     |                      |                          |  |      |              |                        |                            |            |                      |                          |        |        |      |       |        |      |        |      |        |      |       |       |      |        |       |        |      |       |        |      |        |
| 10 uM                      | 103.89                           | 0.87                                                                                                                                                                                                                                                                                                                                                                                                                                                                                                                                                                                                                                                                                | 95.97            | 103.16                 | 0.07                       | -23.63     |                      |                          |  |      |              |                        |                            |            |                      |                          |        |        |      |       |        |      |        |      |        |      |       |       |      |        |       |        |      |       |        |      |        |

| Compound                   | Normalized Values (A and B Sets) | Responses                                                                                                                                                                                                                                                                                                                                                                                                                                                                                                                                                                                                                                                                   |                  |                        |                            |            |                      |                          |  |      |              |                        |                            |            |                      |                          |        |       |      |        |       |      |        |      |       |      |   |       |      |        |       |       |      |       |       |      |        |
|----------------------------|----------------------------------|-----------------------------------------------------------------------------------------------------------------------------------------------------------------------------------------------------------------------------------------------------------------------------------------------------------------------------------------------------------------------------------------------------------------------------------------------------------------------------------------------------------------------------------------------------------------------------------------------------------------------------------------------------------------------------|------------------|------------------------|----------------------------|------------|----------------------|--------------------------|--|------|--------------|------------------------|----------------------------|------------|----------------------|--------------------------|--------|-------|------|--------|-------|------|--------|------|-------|------|---|-------|------|--------|-------|-------|------|-------|-------|------|--------|
| <b>Reboxetine mesylate</b> |                                  | <table border="1"> <thead> <tr> <th colspan="7">Average Response</th> </tr> <tr> <th>Dose</th> <th>Green Signal</th> <th>Actual Pct Green Cells</th> <th>Normalized Pct Green Cells</th> <th>Red Signal</th> <th>Actual Pct Red Cells</th> <th>Normalized Pct Red Cells</th> </tr> </thead> <tbody> <tr> <td>0.1 uM</td> <td>78.74</td> <td>0.74</td> <td>-47.37</td> <td>75.91</td> <td>0.03</td> <td>-48.74</td> </tr> <tr> <td>1 uM</td> <td>71.46</td> <td>0.52</td> <td>-</td> <td>93.78</td> <td>0.08</td> <td>-24.62</td> </tr> <tr> <td>10 uM</td> <td>90.68</td> <td>0.80</td> <td>16.79</td> <td>80.20</td> <td>0.04</td> <td>-44.62</td> </tr> </tbody> </table> | Average Response |                        |                            |            |                      |                          |  | Dose | Green Signal | Actual Pct Green Cells | Normalized Pct Green Cells | Red Signal | Actual Pct Red Cells | Normalized Pct Red Cells | 0.1 uM | 78.74 | 0.74 | -47.37 | 75.91 | 0.03 | -48.74 | 1 uM | 71.46 | 0.52 | - | 93.78 | 0.08 | -24.62 | 10 uM | 90.68 | 0.80 | 16.79 | 80.20 | 0.04 | -44.62 |
|                            |                                  | Average Response                                                                                                                                                                                                                                                                                                                                                                                                                                                                                                                                                                                                                                                            |                  |                        |                            |            |                      |                          |  |      |              |                        |                            |            |                      |                          |        |       |      |        |       |      |        |      |       |      |   |       |      |        |       |       |      |       |       |      |        |
|                            |                                  | Dose                                                                                                                                                                                                                                                                                                                                                                                                                                                                                                                                                                                                                                                                        | Green Signal     | Actual Pct Green Cells | Normalized Pct Green Cells | Red Signal | Actual Pct Red Cells | Normalized Pct Red Cells |  |      |              |                        |                            |            |                      |                          |        |       |      |        |       |      |        |      |       |      |   |       |      |        |       |       |      |       |       |      |        |
|                            |                                  | 0.1 uM                                                                                                                                                                                                                                                                                                                                                                                                                                                                                                                                                                                                                                                                      | 78.74            | 0.74                   | -47.37                     | 75.91      | 0.03                 | -48.74                   |  |      |              |                        |                            |            |                      |                          |        |       |      |        |       |      |        |      |       |      |   |       |      |        |       |       |      |       |       |      |        |
| 1 uM                       | 71.46                            | 0.52                                                                                                                                                                                                                                                                                                                                                                                                                                                                                                                                                                                                                                                                        | -                | 93.78                  | 0.08                       | -24.62     |                      |                          |  |      |              |                        |                            |            |                      |                          |        |       |      |        |       |      |        |      |       |      |   |       |      |        |       |       |      |       |       |      |        |
| 10 uM                      | 90.68                            | 0.80                                                                                                                                                                                                                                                                                                                                                                                                                                                                                                                                                                                                                                                                        | 16.79            | 80.20                  | 0.04                       | -44.62     |                      |                          |  |      |              |                        |                            |            |                      |                          |        |       |      |        |       |      |        |      |       |      |   |       |      |        |       |       |      |       |       |      |        |

| Compound                         | Normalized Values (A and B Sets) | Responses                                                                                                                                                                                                                                                                                                                                                                                                                                                                                                                                                                                                                                                                      |                  |                        |                            |            |                      |                          |  |      |              |                        |                            |            |                      |                          |        |       |      |       |       |      |        |      |       |      |        |       |      |        |       |       |      |       |        |      |      |
|----------------------------------|----------------------------------|--------------------------------------------------------------------------------------------------------------------------------------------------------------------------------------------------------------------------------------------------------------------------------------------------------------------------------------------------------------------------------------------------------------------------------------------------------------------------------------------------------------------------------------------------------------------------------------------------------------------------------------------------------------------------------|------------------|------------------------|----------------------------|------------|----------------------|--------------------------|--|------|--------------|------------------------|----------------------------|------------|----------------------|--------------------------|--------|-------|------|-------|-------|------|--------|------|-------|------|--------|-------|------|--------|-------|-------|------|-------|--------|------|------|
| <b>Regorafenib (BAY 73-4506)</b> |                                  | <table border="1"> <thead> <tr> <th colspan="7">Average Response</th> </tr> <tr> <th>Dose</th> <th>Green Signal</th> <th>Actual Pct Green Cells</th> <th>Normalized Pct Green Cells</th> <th>Red Signal</th> <th>Actual Pct Red Cells</th> <th>Normalized Pct Red Cells</th> </tr> </thead> <tbody> <tr> <td>0.1 uM</td> <td>97.23</td> <td>0.86</td> <td>55.51</td> <td>81.16</td> <td>0.04</td> <td>-53.18</td> </tr> <tr> <td>1 uM</td> <td>96.24</td> <td>0.80</td> <td>-20.98</td> <td>98.44</td> <td>0.10</td> <td>-12.83</td> </tr> <tr> <td>10 uM</td> <td>96.04</td> <td>0.87</td> <td>95.41</td> <td>122.03</td> <td>0.13</td> <td>1.32</td> </tr> </tbody> </table> | Average Response |                        |                            |            |                      |                          |  | Dose | Green Signal | Actual Pct Green Cells | Normalized Pct Green Cells | Red Signal | Actual Pct Red Cells | Normalized Pct Red Cells | 0.1 uM | 97.23 | 0.86 | 55.51 | 81.16 | 0.04 | -53.18 | 1 uM | 96.24 | 0.80 | -20.98 | 98.44 | 0.10 | -12.83 | 10 uM | 96.04 | 0.87 | 95.41 | 122.03 | 0.13 | 1.32 |
|                                  |                                  | Average Response                                                                                                                                                                                                                                                                                                                                                                                                                                                                                                                                                                                                                                                               |                  |                        |                            |            |                      |                          |  |      |              |                        |                            |            |                      |                          |        |       |      |       |       |      |        |      |       |      |        |       |      |        |       |       |      |       |        |      |      |
|                                  |                                  | Dose                                                                                                                                                                                                                                                                                                                                                                                                                                                                                                                                                                                                                                                                           | Green Signal     | Actual Pct Green Cells | Normalized Pct Green Cells | Red Signal | Actual Pct Red Cells | Normalized Pct Red Cells |  |      |              |                        |                            |            |                      |                          |        |       |      |       |       |      |        |      |       |      |        |       |      |        |       |       |      |       |        |      |      |
|                                  |                                  | 0.1 uM                                                                                                                                                                                                                                                                                                                                                                                                                                                                                                                                                                                                                                                                         | 97.23            | 0.86                   | 55.51                      | 81.16      | 0.04                 | -53.18                   |  |      |              |                        |                            |            |                      |                          |        |       |      |       |       |      |        |      |       |      |        |       |      |        |       |       |      |       |        |      |      |
| 1 uM                             | 96.24                            | 0.80                                                                                                                                                                                                                                                                                                                                                                                                                                                                                                                                                                                                                                                                           | -20.98           | 98.44                  | 0.10                       | -12.83     |                      |                          |  |      |              |                        |                            |            |                      |                          |        |       |      |       |       |      |        |      |       |      |        |       |      |        |       |       |      |       |        |      |      |
| 10 uM                            | 96.04                            | 0.87                                                                                                                                                                                                                                                                                                                                                                                                                                                                                                                                                                                                                                                                           | 95.41            | 122.03                 | 0.13                       | 1.32       |                      |                          |  |      |              |                        |                            |            |                      |                          |        |       |      |       |       |      |        |      |       |      |        |       |      |        |       |       |      |       |        |      |      |

| Compound           | Normalized Values (A and B Sets) | Responses                                                                                                                                                                                                                                                                                                                                                                                                                                                                                                                                                                                                                                                                    |                  |                        |                            |            |                      |                          |  |      |              |                        |                            |            |                      |                          |        |       |      |        |       |      |        |      |       |      |        |       |      |        |       |        |      |   |        |      |      |
|--------------------|----------------------------------|------------------------------------------------------------------------------------------------------------------------------------------------------------------------------------------------------------------------------------------------------------------------------------------------------------------------------------------------------------------------------------------------------------------------------------------------------------------------------------------------------------------------------------------------------------------------------------------------------------------------------------------------------------------------------|------------------|------------------------|----------------------------|------------|----------------------|--------------------------|--|------|--------------|------------------------|----------------------------|------------|----------------------|--------------------------|--------|-------|------|--------|-------|------|--------|------|-------|------|--------|-------|------|--------|-------|--------|------|---|--------|------|------|
| <b>Resminostat</b> |                                  | <table border="1"> <thead> <tr> <th colspan="7">Average Response</th> </tr> <tr> <th>Dose</th> <th>Green Signal</th> <th>Actual Pct Green Cells</th> <th>Normalized Pct Green Cells</th> <th>Red Signal</th> <th>Actual Pct Red Cells</th> <th>Normalized Pct Red Cells</th> </tr> </thead> <tbody> <tr> <td>0.1 uM</td> <td>99.00</td> <td>0.89</td> <td>100.30</td> <td>81.67</td> <td>0.06</td> <td>-24.26</td> </tr> <tr> <td>1 uM</td> <td>84.08</td> <td>0.67</td> <td>-13.60</td> <td>74.49</td> <td>0.04</td> <td>-39.69</td> </tr> <tr> <td>10 uM</td> <td>106.25</td> <td>0.80</td> <td>-</td> <td>115.37</td> <td>0.14</td> <td>6.08</td> </tr> </tbody> </table> | Average Response |                        |                            |            |                      |                          |  | Dose | Green Signal | Actual Pct Green Cells | Normalized Pct Green Cells | Red Signal | Actual Pct Red Cells | Normalized Pct Red Cells | 0.1 uM | 99.00 | 0.89 | 100.30 | 81.67 | 0.06 | -24.26 | 1 uM | 84.08 | 0.67 | -13.60 | 74.49 | 0.04 | -39.69 | 10 uM | 106.25 | 0.80 | - | 115.37 | 0.14 | 6.08 |
|                    |                                  | Average Response                                                                                                                                                                                                                                                                                                                                                                                                                                                                                                                                                                                                                                                             |                  |                        |                            |            |                      |                          |  |      |              |                        |                            |            |                      |                          |        |       |      |        |       |      |        |      |       |      |        |       |      |        |       |        |      |   |        |      |      |
|                    |                                  | Dose                                                                                                                                                                                                                                                                                                                                                                                                                                                                                                                                                                                                                                                                         | Green Signal     | Actual Pct Green Cells | Normalized Pct Green Cells | Red Signal | Actual Pct Red Cells | Normalized Pct Red Cells |  |      |              |                        |                            |            |                      |                          |        |       |      |        |       |      |        |      |       |      |        |       |      |        |       |        |      |   |        |      |      |
|                    |                                  | 0.1 uM                                                                                                                                                                                                                                                                                                                                                                                                                                                                                                                                                                                                                                                                       | 99.00            | 0.89                   | 100.30                     | 81.67      | 0.06                 | -24.26                   |  |      |              |                        |                            |            |                      |                          |        |       |      |        |       |      |        |      |       |      |        |       |      |        |       |        |      |   |        |      |      |
| 1 uM               | 84.08                            | 0.67                                                                                                                                                                                                                                                                                                                                                                                                                                                                                                                                                                                                                                                                         | -13.60           | 74.49                  | 0.04                       | -39.69     |                      |                          |  |      |              |                        |                            |            |                      |                          |        |       |      |        |       |      |        |      |       |      |        |       |      |        |       |        |      |   |        |      |      |
| 10 uM              | 106.25                           | 0.80                                                                                                                                                                                                                                                                                                                                                                                                                                                                                                                                                                                                                                                                         | -                | 115.37                 | 0.14                       | 6.08       |                      |                          |  |      |              |                        |                            |            |                      |                          |        |       |      |        |       |      |        |      |       |      |        |       |      |        |       |        |      |   |        |      |      |

| Compound           | Normalized Values (A and B Sets) | Responses                                                                                                                                                                                                                                                                                                                                                                                                                                                                                                                                                                                                                                                                    |                  |                        |                            |            |                      |                          |  |      |              |                        |                            |            |                      |                          |        |       |      |        |       |      |        |      |       |      |        |       |      |        |       |       |      |   |       |      |        |
|--------------------|----------------------------------|------------------------------------------------------------------------------------------------------------------------------------------------------------------------------------------------------------------------------------------------------------------------------------------------------------------------------------------------------------------------------------------------------------------------------------------------------------------------------------------------------------------------------------------------------------------------------------------------------------------------------------------------------------------------------|------------------|------------------------|----------------------------|------------|----------------------|--------------------------|--|------|--------------|------------------------|----------------------------|------------|----------------------|--------------------------|--------|-------|------|--------|-------|------|--------|------|-------|------|--------|-------|------|--------|-------|-------|------|---|-------|------|--------|
| <b>Retapamulin</b> |                                  | <table border="1"> <thead> <tr> <th colspan="7">Average Response</th> </tr> <tr> <th>Dose</th> <th>Green Signal</th> <th>Actual Pct Green Cells</th> <th>Normalized Pct Green Cells</th> <th>Red Signal</th> <th>Actual Pct Red Cells</th> <th>Normalized Pct Red Cells</th> </tr> </thead> <tbody> <tr> <td>0.1 uM</td> <td>86.71</td> <td>0.83</td> <td>-59.72</td> <td>67.78</td> <td>0.01</td> <td>-57.53</td> </tr> <tr> <td>1 uM</td> <td>79.49</td> <td>0.63</td> <td>-68.47</td> <td>67.54</td> <td>0.01</td> <td>-62.72</td> </tr> <tr> <td>10 uM</td> <td>80.13</td> <td>0.69</td> <td>-</td> <td>87.35</td> <td>0.03</td> <td>-47.07</td> </tr> </tbody> </table> | Average Response |                        |                            |            |                      |                          |  | Dose | Green Signal | Actual Pct Green Cells | Normalized Pct Green Cells | Red Signal | Actual Pct Red Cells | Normalized Pct Red Cells | 0.1 uM | 86.71 | 0.83 | -59.72 | 67.78 | 0.01 | -57.53 | 1 uM | 79.49 | 0.63 | -68.47 | 67.54 | 0.01 | -62.72 | 10 uM | 80.13 | 0.69 | - | 87.35 | 0.03 | -47.07 |
|                    |                                  | Average Response                                                                                                                                                                                                                                                                                                                                                                                                                                                                                                                                                                                                                                                             |                  |                        |                            |            |                      |                          |  |      |              |                        |                            |            |                      |                          |        |       |      |        |       |      |        |      |       |      |        |       |      |        |       |       |      |   |       |      |        |
|                    |                                  | Dose                                                                                                                                                                                                                                                                                                                                                                                                                                                                                                                                                                                                                                                                         | Green Signal     | Actual Pct Green Cells | Normalized Pct Green Cells | Red Signal | Actual Pct Red Cells | Normalized Pct Red Cells |  |      |              |                        |                            |            |                      |                          |        |       |      |        |       |      |        |      |       |      |        |       |      |        |       |       |      |   |       |      |        |
|                    |                                  | 0.1 uM                                                                                                                                                                                                                                                                                                                                                                                                                                                                                                                                                                                                                                                                       | 86.71            | 0.83                   | -59.72                     | 67.78      | 0.01                 | -57.53                   |  |      |              |                        |                            |            |                      |                          |        |       |      |        |       |      |        |      |       |      |        |       |      |        |       |       |      |   |       |      |        |
| 1 uM               | 79.49                            | 0.63                                                                                                                                                                                                                                                                                                                                                                                                                                                                                                                                                                                                                                                                         | -68.47           | 67.54                  | 0.01                       | -62.72     |                      |                          |  |      |              |                        |                            |            |                      |                          |        |       |      |        |       |      |        |      |       |      |        |       |      |        |       |       |      |   |       |      |        |
| 10 uM              | 80.13                            | 0.69                                                                                                                                                                                                                                                                                                                                                                                                                                                                                                                                                                                                                                                                         | -                | 87.35                  | 0.03                       | -47.07     |                      |                          |  |      |              |                        |                            |            |                      |                          |        |       |      |        |       |      |        |      |       |      |        |       |      |        |       |       |      |   |       |      |        |

| Compound     | Normalized Values (A and B Sets) | Responses                                                                                                                                                                                                                                                                                                                                                                                                                                                                                                                                                   |                  |                        |                            |            |                      |                          |  |      |              |                        |                            |            |                      |                          |        |       |      |       |       |      |        |      |        |      |       |        |      |      |
|--------------|----------------------------------|-------------------------------------------------------------------------------------------------------------------------------------------------------------------------------------------------------------------------------------------------------------------------------------------------------------------------------------------------------------------------------------------------------------------------------------------------------------------------------------------------------------------------------------------------------------|------------------|------------------------|----------------------------|------------|----------------------|--------------------------|--|------|--------------|------------------------|----------------------------|------------|----------------------|--------------------------|--------|-------|------|-------|-------|------|--------|------|--------|------|-------|--------|------|------|
| <b>RG108</b> |                                  | <table border="1"> <thead> <tr> <th colspan="7">Average Response</th> </tr> <tr> <th>Dose</th> <th>Green Signal</th> <th>Actual Pct Green Cells</th> <th>Normalized Pct Green Cells</th> <th>Red Signal</th> <th>Actual Pct Red Cells</th> <th>Normalized Pct Red Cells</th> </tr> </thead> <tbody> <tr> <td>0.1 uM</td> <td>96.85</td> <td>0.85</td> <td>55.53</td> <td>87.09</td> <td>0.07</td> <td>-21.00</td> </tr> <tr> <td>1 uM</td> <td>100.87</td> <td>0.85</td> <td>81.43</td> <td>108.52</td> <td>0.15</td> <td>9.25</td> </tr> </tbody> </table> | Average Response |                        |                            |            |                      |                          |  | Dose | Green Signal | Actual Pct Green Cells | Normalized Pct Green Cells | Red Signal | Actual Pct Red Cells | Normalized Pct Red Cells | 0.1 uM | 96.85 | 0.85 | 55.53 | 87.09 | 0.07 | -21.00 | 1 uM | 100.87 | 0.85 | 81.43 | 108.52 | 0.15 | 9.25 |
|              |                                  | Average Response                                                                                                                                                                                                                                                                                                                                                                                                                                                                                                                                            |                  |                        |                            |            |                      |                          |  |      |              |                        |                            |            |                      |                          |        |       |      |       |       |      |        |      |        |      |       |        |      |      |
|              |                                  | Dose                                                                                                                                                                                                                                                                                                                                                                                                                                                                                                                                                        | Green Signal     | Actual Pct Green Cells | Normalized Pct Green Cells | Red Signal | Actual Pct Red Cells | Normalized Pct Red Cells |  |      |              |                        |                            |            |                      |                          |        |       |      |       |       |      |        |      |        |      |       |        |      |      |
| 0.1 uM       | 96.85                            | 0.85                                                                                                                                                                                                                                                                                                                                                                                                                                                                                                                                                        | 55.53            | 87.09                  | 0.07                       | -21.00     |                      |                          |  |      |              |                        |                            |            |                      |                          |        |       |      |       |       |      |        |      |        |      |       |        |      |      |
| 1 uM         | 100.87                           | 0.85                                                                                                                                                                                                                                                                                                                                                                                                                                                                                                                                                        | 81.43            | 108.52                 | 0.15                       | 9.25       |                      |                          |  |      |              |                        |                            |            |                      |                          |        |       |      |       |       |      |        |      |        |      |       |        |      |      |

| Compound | Normalized Values (A and B Sets) | Responses |        |      |        |        |      |        |
|----------|----------------------------------|-----------|--------|------|--------|--------|------|--------|
|          |                                  | 10 uM     | 104.80 | 0.93 | 435.83 | 100.45 | 0.09 | -14.94 |

| Compound                | Normalized Values (A and B Sets) | Responses        |              |                        |                            |            |                      |                          |
|-------------------------|----------------------------------|------------------|--------------|------------------------|----------------------------|------------|----------------------|--------------------------|
| <b>RG2833 (RGFP109)</b> |                                  | Average Response |              |                        |                            |            |                      |                          |
|                         |                                  | Dose             | Green Signal | Actual Pct Green Cells | Normalized Pct Green Cells | Red Signal | Actual Pct Red Cells | Normalized Pct Red Cells |
|                         |                                  | 0.1 uM           | 84.80        | 0.77                   | -9.66                      | 72.67      | 0.02                 | -63.84                   |
|                         |                                  | 1 uM             | 86.92        | 0.76                   | 931.03                     | 60.64      | 0.01                 | -43.34                   |
| 10 uM                   | 92.43                            | 0.83             | 17.89        | 92.31                  | 0.10                       | -8.78      |                      |                          |

| Compound                          | Normalized Values (A and B Sets) | Responses        |              |                        |                            |            |                      |                          |
|-----------------------------------|----------------------------------|------------------|--------------|------------------------|----------------------------|------------|----------------------|--------------------------|
| <b>RGD (Arg-Gly-Asp) Peptides</b> |                                  | Average Response |              |                        |                            |            |                      |                          |
|                                   |                                  | Dose             | Green Signal | Actual Pct Green Cells | Normalized Pct Green Cells | Red Signal | Actual Pct Red Cells | Normalized Pct Red Cells |
|                                   |                                  | 0.1 uM           | 96.81        | 0.86                   | 71.22                      | 66.69      | 0.01                 | -70.06                   |
|                                   |                                  | 1 uM             | 102.53       | 0.87                   | 80.58                      | 68.62      | 0.01                 | -43.49                   |
| 10 uM                             | 88.51                            | 0.84             | 18.62        | 66.50                  | 0.03                       | -39.42     |                      |                          |

| Compound             | Normalized Values (A and B Sets) | Responses        |              |                        |                            |            |                      |                          |
|----------------------|----------------------------------|------------------|--------------|------------------------|----------------------------|------------|----------------------|--------------------------|
| <b>Rheochrysidin</b> |                                  | Average Response |              |                        |                            |            |                      |                          |
|                      |                                  | Dose             | Green Signal | Actual Pct Green Cells | Normalized Pct Green Cells | Red Signal | Actual Pct Red Cells | Normalized Pct Red Cells |
|                      |                                  | 0.1 uM           | 100.78       | 0.93                   | 138.22                     | 90.57      | 0.05                 | -31.11                   |
|                      |                                  | 1 uM             | 92.42        | 0.80                   | 49.70                      | 76.45      | 0.03                 | -42.36                   |
| 10 uM                | 95.16                            | 0.87             | 231.74       | 101.93                 | 0.09                       | -15.22     |                      |                          |

| Compound       | Normalized Values (A and B Sets) | Responses        |              |                        |                            |            |                      |                          |
|----------------|----------------------------------|------------------|--------------|------------------------|----------------------------|------------|----------------------|--------------------------|
| <b>Ribitol</b> |                                  | Average Response |              |                        |                            |            |                      |                          |
|                |                                  | Dose             | Green Signal | Actual Pct Green Cells | Normalized Pct Green Cells | Red Signal | Actual Pct Red Cells | Normalized Pct Red Cells |
|                |                                  | 0.1 uM           | 104.38       | 0.94                   | 144.25                     | 104.10     | 0.14                 | 16.17                    |
|                |                                  | 1 uM             | 100.30       | 0.84                   | 67.16                      | 97.83      | 0.08                 | -21.51                   |
| 10 uM          | 88.62                            | 0.82             | 458.34       | 105.57                 | 0.10                       | -8.91      |                      |                          |

| Compound                    | Normalized Values (A and B Sets) | Responses        |              |  |  |            |                      |
|-----------------------------|----------------------------------|------------------|--------------|--|--|------------|----------------------|
| <b>Ribostamycin Sulfate</b> |                                  | Average Response |              |  |  |            |                      |
|                             |                                  | Dose             | Green Signal |  |  | Red Signal | Actual Pct Red Cells |

Compound

Normalized Values (A and B Sets)

Responses

| Compound | Normalized Values (A and B Sets) |      | Average Response |              |                        |                            |            |                      |                          |
|----------|----------------------------------|------|------------------|--------------|------------------------|----------------------------|------------|----------------------|--------------------------|
|          |                                  |      | Dose             | Green Signal | Actual Pct Green Cells | Normalized Pct Green Cells | Red Signal | Actual Pct Red Cells | Normalized Pct Red Cells |
|          |                                  |      | 0.1 uM           | 83.21        | 0.77                   | 146.36                     | 90.55      | 0.08                 | -23.88                   |
|          |                                  |      | 1 uM             | 107.22       | 0.90                   | 132.53                     | 75.23      | 0.03                 | -53.31                   |
| 10 uM    | 98.37                            | 0.83 | 91.14            | 93.33        | 0.09                   | -14.23                     |            |                      |                          |

Compound

Normalized Values (A and B Sets)

Responses

| Compound | Normalized Values (A and B Sets) |      | Average Response |              |                        |                            |            |                      |                          |
|----------|----------------------------------|------|------------------|--------------|------------------------|----------------------------|------------|----------------------|--------------------------|
|          |                                  |      | Dose             | Green Signal | Actual Pct Green Cells | Normalized Pct Green Cells | Red Signal | Actual Pct Red Cells | Normalized Pct Red Cells |
|          |                                  |      | 0.1 uM           | 86.89        | 0.79                   | 16.78                      | 102.56     | 0.11                 | -2.57                    |
|          |                                  |      | 1 uM             | 97.06        | 0.92                   | -8.84                      | 73.13      | 0.02                 | -38.94                   |
| 10 uM    | 99.14                            | 0.95 | 127.50           | 93.62        | 0.12                   | 0.40                       |            |                      |                          |

Compound

Normalized Values (A and B Sets)

Responses

| Compound | Normalized Values (A and B Sets) |      | Average Response |              |                        |                            |            |                      |                          |
|----------|----------------------------------|------|------------------|--------------|------------------------|----------------------------|------------|----------------------|--------------------------|
|          |                                  |      | Dose             | Green Signal | Actual Pct Green Cells | Normalized Pct Green Cells | Red Signal | Actual Pct Red Cells | Normalized Pct Red Cells |
|          |                                  |      | 0.1 uM           | 93.29        | 0.81                   | -12.15                     | 90.77      | 0.05                 | -42.86                   |
|          |                                  |      | 1 uM             | 84.62        | 0.72                   | 130.96                     | 111.50     | 0.14                 | 6.54                     |
| 10 uM    | 90.43                            | 0.75 | 6.09             | 110.45       | 0.08                   | -17.71                     |            |                      |                          |

Compound

Normalized Values (A and B Sets)

Responses

| Compound | Normalized Values (A and B Sets) |      | Average Response |              |                        |                            |            |                      |                          |
|----------|----------------------------------|------|------------------|--------------|------------------------|----------------------------|------------|----------------------|--------------------------|
|          |                                  |      | Dose             | Green Signal | Actual Pct Green Cells | Normalized Pct Green Cells | Red Signal | Actual Pct Red Cells | Normalized Pct Red Cells |
|          |                                  |      | 0.1 uM           | 122.39       | 0.92                   | 135.98                     | 96.99      | 0.10                 | -16.96                   |
|          |                                  |      | 1 uM             | 121.10       | 0.90                   | 119.76                     | 117.80     | 0.17                 | 19.12                    |
| 10 uM    | 108.96                           | 0.83 | 66.33            | 113.79       | 0.14                   | 5.06                       |            |                      |                          |

Compound

Normalized Values (A and B Sets)

Responses

| Compound | Normalized Values (A and B Sets) |      | Average Response |              |                        |                            |            |                      |                          |
|----------|----------------------------------|------|------------------|--------------|------------------------|----------------------------|------------|----------------------|--------------------------|
|          |                                  |      | Dose             | Green Signal | Actual Pct Green Cells | Normalized Pct Green Cells | Red Signal | Actual Pct Red Cells | Normalized Pct Red Cells |
|          |                                  |      | 0.1 uM           | 88.05        | 0.73                   | -25.01                     | 80.04      | 0.04                 | -49.86                   |
|          |                                  |      | 1 uM             | 89.34        | 0.79                   | 526.77                     | 93.74      | 0.09                 | -0.49                    |
| 10 uM    | 102.04                           | 0.90 | 90.21            | 77.24        | 0.04                   | -33.75                     |            |                      |                          |

Compound

Normalized Values (A and B Sets)

Responses

| <b>Rimantadine</b> |        | Average Response |              |                        |                            |            |                      |                          |
|--------------------|--------|------------------|--------------|------------------------|----------------------------|------------|----------------------|--------------------------|
|                    |        | Dose             | Green Signal | Actual Pct Green Cells | Normalized Pct Green Cells | Red Signal | Actual Pct Red Cells | Normalized Pct Red Cells |
|                    |        | 0.1 uM           | 92.53        | 0.84                   | 17.32                      | 81.18      | 0.05                 | -47.32                   |
|                    |        | 1 uM             | 103.24       | 0.90                   | 107.65                     | 89.99      | 0.07                 | -26.07                   |
| 10 uM              | 104.35 | 0.87             | 98.03        | 112.14                 | 0.12                       | -0.62      |                      |                          |

Compound

Normalized Values (A and B Sets)

Responses

| <b>Rimonabant</b> |       | Average Response |              |                        |                            |            |                      |                          |
|-------------------|-------|------------------|--------------|------------------------|----------------------------|------------|----------------------|--------------------------|
|                   |       | Dose             | Green Signal | Actual Pct Green Cells | Normalized Pct Green Cells | Red Signal | Actual Pct Red Cells | Normalized Pct Red Cells |
|                   |       | 0.1 uM           | 79.53        | 0.70                   | -21.39                     | 79.43      | 0.05                 | -39.36                   |
|                   |       | 1 uM             | 83.79        | 0.71                   | -6.79                      | 95.79      | 0.07                 | -31.61                   |
| 10 uM             | 95.55 | 0.82             | 33.02        | 92.32                  | 0.11                       | -9.29      |                      |                          |

Compound

Normalized Values (A and B Sets)

Responses

| <b>Ritodrine HCl</b> |        | Average Response |              |                        |                            |            |                      |                          |
|----------------------|--------|------------------|--------------|------------------------|----------------------------|------------|----------------------|--------------------------|
|                      |        | Dose             | Green Signal | Actual Pct Green Cells | Normalized Pct Green Cells | Red Signal | Actual Pct Red Cells | Normalized Pct Red Cells |
|                      |        | 0.1 uM           | 94.77        | 0.88                   | 91.71                      | 90.38      | 0.06                 | -36.46                   |
|                      |        | 1 uM             | 87.67        | 0.80                   | 73.89                      | 101.99     | 0.16                 | 50.19                    |
| 10 uM                | 103.39 | 0.91             | 85.87        | 79.17                  | 0.05                       | -29.14     |                      |                          |

Compound

Normalized Values (A and B Sets)

Responses

| <b>Rivaroxaban</b> |       | Average Response |              |                        |                            |            |                      |                          |
|--------------------|-------|------------------|--------------|------------------------|----------------------------|------------|----------------------|--------------------------|
|                    |       | Dose             | Green Signal | Actual Pct Green Cells | Normalized Pct Green Cells | Red Signal | Actual Pct Red Cells | Normalized Pct Red Cells |
|                    |       | 0.1 uM           | 105.42       | 0.95                   | 242.05                     | 86.81      | 0.05                 | -38.77                   |
|                    |       | 1 uM             | 96.89        | 0.81                   | 62.82                      | 92.01      | 0.08                 | -24.05                   |
| 10 uM              | 95.43 | 0.81             | 93.04        | 86.39                  | 0.05                       | -35.78     |                      |                          |

Compound

Normalized Values (A and B Sets)

Responses

| <b>Rivastigmine Tartrate</b> |        | Average Response |              |                        |                            |            |                      |                          |
|------------------------------|--------|------------------|--------------|------------------------|----------------------------|------------|----------------------|--------------------------|
|                              |        | Dose             | Green Signal | Actual Pct Green Cells | Normalized Pct Green Cells | Red Signal | Actual Pct Red Cells | Normalized Pct Red Cells |
|                              |        | 0.1 uM           | 86.36        | 0.76                   | 21.28                      | 83.65      | 0.04                 | -51.80                   |
|                              |        | 1 uM             | 90.17        | 0.72                   | -29.02                     | 88.09      | 0.05                 | -32.96                   |
| 10 uM                        | 103.95 | 0.85             | 85.20        | 102.81                 | 0.06                       | -28.27     |                      |                          |

Compound

Normalized Values (A and B Sets)

Responses

| RKI-1447 | Percent Green Cells (AB) |     | Percent Red Cells (AB) |     | Average Response |              |                        |                            |            |                      |                          |
|----------|--------------------------|-----|------------------------|-----|------------------|--------------|------------------------|----------------------------|------------|----------------------|--------------------------|
|          | Percent Response         |     | Percent Response       |     | Dose             | Green Signal | Actual Pct Green Cells | Normalized Pct Green Cells | Red Signal | Actual Pct Red Cells | Normalized Pct Red Cells |
|          | 0.1 uM                   | 100 | 0.1 uM                 | 100 | 0.1 uM           | 130.05       | 0.96                   | 248.84                     | 107.94     | 0.21                 | 46.29                    |
|          | 1 uM                     | 100 | 1 uM                   | 100 | 1 uM             | 117.50       | 0.88                   | 113.07                     | 93.45      | 0.09                 | -21.67                   |
|          | 10 uM                    | 35  | 10 uM                  | 100 | 10 uM            | 112.64       | 0.85                   | 141.30                     | 136.87     | 0.28                 | 83.65                    |

Compound

Normalized Values (A and B Sets)

Responses

| RO4929097 | Percent Green Cells (AB) |     | Percent Red Cells (AB) |    | Average Response |              |                        |                            |            |                      |                          |
|-----------|--------------------------|-----|------------------------|----|------------------|--------------|------------------------|----------------------------|------------|----------------------|--------------------------|
|           | Percent Response         |     | Percent Response       |    | Dose             | Green Signal | Actual Pct Green Cells | Normalized Pct Green Cells | Red Signal | Actual Pct Red Cells | Normalized Pct Red Cells |
|           | 0.1 uM                   | 100 | 0.1 uM                 | 0  | 0.1 uM           | 102.78       | 0.91                   | 101.73                     | 87.92      | 0.04                 | -51.24                   |
|           | 1 uM                     | 75  | 1 uM                   | 0  | 1 uM             | 89.34        | 0.76                   | 8.85                       | 112.20     | 0.10                 | -9.23                    |
|           | 10 uM                    | 100 | 10 uM                  | 50 | 10 uM            | 102.24       | 0.87                   | 99.10                      | 126.63     | 0.16                 | 20.03                    |

Compound

Normalized Values (A and B Sets)

Responses

| Rocilinostat (ACY-1215) | Percent Green Cells (AB) |     | Percent Red Cells (AB) |     | Average Response |              |                        |                            |            |                      |                          |
|-------------------------|--------------------------|-----|------------------------|-----|------------------|--------------|------------------------|----------------------------|------------|----------------------|--------------------------|
|                         | Percent Response         |     | Percent Response       |     | Dose             | Green Signal | Actual Pct Green Cells | Normalized Pct Green Cells | Red Signal | Actual Pct Red Cells | Normalized Pct Red Cells |
|                         | 0.1 uM                   | 70  | 0.1 uM                 | 100 | 0.1 uM           | 100.70       | 0.91                   | 112.69                     | 92.62      | 0.07                 | -33.11                   |
|                         | 1 uM                     | 100 | 1 uM                   | 100 | 1 uM             | 99.46        | 0.92                   | 207.65                     | 87.55      | 0.06                 | -15.44                   |
|                         | 10 uM                    | 100 | 10 uM                  | 65  | 10 uM            | 78.76        | 0.64                   | 144.64                     | 151.65     | 0.33                 | 96.30                    |

Compound

Normalized Values (A and B Sets)

Responses

| Rocuronium Bromide | Percent Green Cells (AB) |     | Percent Red Cells (AB) |   | Average Response |              |                        |                            |            |                      |                          |
|--------------------|--------------------------|-----|------------------------|---|------------------|--------------|------------------------|----------------------------|------------|----------------------|--------------------------|
|                    | Percent Response         |     | Percent Response       |   | Dose             | Green Signal | Actual Pct Green Cells | Normalized Pct Green Cells | Red Signal | Actual Pct Red Cells | Normalized Pct Red Cells |
|                    | 0.1 uM                   | 60  | 0.1 uM                 | 0 | 0.1 uM           | 90.40        | 0.83                   | 28.11                      | 84.42      | 0.04                 | -52.89                   |
|                    | 1 uM                     | 100 | 1 uM                   | 0 | 1 uM             | 106.35       | 0.90                   | 134.74                     | 96.69      | 0.07                 | -26.48                   |
|                    | 10 uM                    | 80  | 10 uM                  | 0 | 10 uM            | 97.04        | 0.87                   | 91.46                      | 96.36      | 0.05                 | -31.93                   |

Compound

Normalized Values (A and B Sets)

Responses

| Roflumilast | Percent Green Cells (AB) |    | Percent Red Cells (AB) |     | Average Response |              |                        |                            |            |                      |                          |
|-------------|--------------------------|----|------------------------|-----|------------------|--------------|------------------------|----------------------------|------------|----------------------|--------------------------|
|             | Percent Response         |    | Percent Response       |     | Dose             | Green Signal | Actual Pct Green Cells | Normalized Pct Green Cells | Red Signal | Actual Pct Red Cells | Normalized Pct Red Cells |
|             | 0.1 uM                   | 65 | 0.1 uM                 | 0   | 0.1 uM           | 85.57        | 0.86                   | 60.36                      | 59.63      | 0.01                 | -50.44                   |
|             | 1 uM                     | 50 | 1 uM                   | 0   | 1 uM             | 87.13        | 0.78                   | 39.30                      | 85.48      | 0.04                 | -39.59                   |
|             | 10 uM                    | 30 | 10 uM                  | 100 | 10 uM            | 95.09        | 0.93                   | 345.75                     | 85.99      | 0.04                 | -38.50                   |



Compound

Normalized Values (A and B Sets)

Responses

| Rosuvastatin Calcium |       |      | Average Response |              |                        |                            |            |                      |                          |
|----------------------|-------|------|------------------|--------------|------------------------|----------------------------|------------|----------------------|--------------------------|
|                      |       |      | Dose             | Green Signal | Actual Pct Green Cells | Normalized Pct Green Cells | Red Signal | Actual Pct Red Cells | Normalized Pct Red Cells |
|                      |       |      | 0.1 uM           | 93.35        | 0.87                   | 66.88                      | 94.29      | 0.07                 | -21.69                   |
|                      |       |      | 1 uM             | 86.14        | 0.75                   | 28.76                      | 86.35      | 0.04                 | -38.23                   |
| 10 uM                | 99.19 | 0.93 | 337.18           | 80.28        | 0.03                   | -42.34                     |            |                      |                          |

Compound

Normalized Values (A and B Sets)

Responses

| Rotundine |        |      | Average Response |              |                        |                            |            |                      |                          |
|-----------|--------|------|------------------|--------------|------------------------|----------------------------|------------|----------------------|--------------------------|
|           |        |      | Dose             | Green Signal | Actual Pct Green Cells | Normalized Pct Green Cells | Red Signal | Actual Pct Red Cells | Normalized Pct Red Cells |
|           |        |      | 0.1 uM           | 96.42        | 0.91                   | 118.57                     | 94.72      | 0.08                 | -17.80                   |
|           |        |      | 1 uM             | 98.57        | 0.86                   | 79.02                      | 96.90      | 0.09                 | -17.22                   |
| 10 uM     | 117.05 | 0.97 | 529.72           | 84.15        | 0.04                   | -39.10                     |            |                      |                          |

Compound

Normalized Values (A and B Sets)

Responses

| Roxithromycin |       |      | Average Response |              |                        |                            |            |                      |                          |
|---------------|-------|------|------------------|--------------|------------------------|----------------------------|------------|----------------------|--------------------------|
|               |       |      | Dose             | Green Signal | Actual Pct Green Cells | Normalized Pct Green Cells | Red Signal | Actual Pct Red Cells | Normalized Pct Red Cells |
|               |       |      | 0.1 uM           | 95.94        | 0.86                   | 69.61                      | 104.69     | 0.16                 | 14.49                    |
|               |       |      | 1 uM             | 99.80        | 0.85                   | 83.03                      | 81.75      | 0.04                 | -38.85                   |
| 10 uM         | 84.21 | 0.74 | 1087.06          | 97.27        | 0.08                   | -19.40                     |            |                      |                          |

Compound

Normalized Values (A and B Sets)

Responses

| RS-127445 |        |      | Average Response |              |                        |                            |            |                      |                          |
|-----------|--------|------|------------------|--------------|------------------------|----------------------------|------------|----------------------|--------------------------|
|           |        |      | Dose             | Green Signal | Actual Pct Green Cells | Normalized Pct Green Cells | Red Signal | Actual Pct Red Cells | Normalized Pct Red Cells |
|           |        |      | 0.1 uM           | 104.53       | 0.93                   | 131.39                     | 106.39     | 0.16                 | 12.78                    |
|           |        |      | 1 uM             | 104.98       | 0.89                   | 100.41                     | 70.41      | 0.02                 | -48.96                   |
| 10 uM     | 104.50 | 0.94 | 385.21           | 81.26        | 0.04                   | -40.03                     |            |                      |                          |

Compound

Normalized Values (A and B Sets)

Responses

| Rufinamide |       |      | Average Response |              |                        |                            |            |                      |                          |
|------------|-------|------|------------------|--------------|------------------------|----------------------------|------------|----------------------|--------------------------|
|            |       |      | Dose             | Green Signal | Actual Pct Green Cells | Normalized Pct Green Cells | Red Signal | Actual Pct Red Cells | Normalized Pct Red Cells |
|            |       |      | 0.1 uM           | 103.98       | 0.91                   | 112.55                     | 105.72     | 0.11                 | -16.77                   |
|            |       |      | 1 uM             | 88.52        | 0.70                   | -29.78                     | 93.11      | 0.09                 | -18.43                   |
| 10 uM      | 98.94 | 0.85 | 81.75            | 110.52       | 0.12                   | 0.17                       |            |                      |                          |

Compound

Normalized Values (A and B Sets)

Responses

| Rupatadine Fumarate | Percent Green Cells (AB) |  | Percent Red Cells (AB) |  | Average Response |              |                        |                            |            |                      |                          |
|---------------------|--------------------------|--|------------------------|--|------------------|--------------|------------------------|----------------------------|------------|----------------------|--------------------------|
|                     | Percent Response         |  | Percent Response       |  | Dose             | Green Signal | Actual Pct Green Cells | Normalized Pct Green Cells | Red Signal | Actual Pct Red Cells | Normalized Pct Red Cells |
|                     | 100                      |  | 100                    |  | 0.1 uM           | 90.09        | 0.87                   | 127.40                     | 72.60      | 0.03                 | -50.60                   |
|                     | 0                        |  | 0                      |  | 1 uM             | 107.80       | 0.89                   | 123.75                     | 92.59      | 0.08                 | -27.38                   |
|                     | 0.1 uM                   |  | 0.1 uM                 |  | 10 uM            | 97.53        | 0.86                   | 84.76                      | 64.32      | 0.01                 | -58.47                   |
|                     | concentration            |  | concentration          |  |                  |              |                        |                            |            |                      |                          |

Compound

Normalized Values (A and B Sets)

Responses

| Rutaecarpine | Percent Green Cells (AB) |  | Percent Red Cells (AB) |  | Average Response |              |                        |                            |            |                      |                          |
|--------------|--------------------------|--|------------------------|--|------------------|--------------|------------------------|----------------------------|------------|----------------------|--------------------------|
|              | Percent Response         |  | Percent Response       |  | Dose             | Green Signal | Actual Pct Green Cells | Normalized Pct Green Cells | Red Signal | Actual Pct Red Cells | Normalized Pct Red Cells |
|              | 100                      |  | 100                    |  | 0.1 uM           | 97.81        | 0.90                   | 104.39                     | 75.74      | 0.02                 | -45.54                   |
|              | 0                        |  | 0                      |  | 1 uM             | 79.75        | 0.65                   | -45.50                     | 71.69      | 0.02                 | -47.33                   |
|              | 0.1 uM                   |  | 0.1 uM                 |  | 10 uM            | 88.81        | 0.85                   | 111.20                     | 84.59      | 0.04                 | -41.65                   |
|              | concentration            |  | concentration          |  |                  |              |                        |                            |            |                      |                          |

Compound

Normalized Values (A and B Sets)

Responses

| Ruxolitinib (INCB018424) | Percent Green Cells (AB) |  | Percent Red Cells (AB) |  | Average Response |              |                        |                            |            |                      |                          |
|--------------------------|--------------------------|--|------------------------|--|------------------|--------------|------------------------|----------------------------|------------|----------------------|--------------------------|
|                          | Percent Response         |  | Percent Response       |  | Dose             | Green Signal | Actual Pct Green Cells | Normalized Pct Green Cells | Red Signal | Actual Pct Red Cells | Normalized Pct Red Cells |
|                          | 100                      |  | 100                    |  | 0.1 uM           | 68.57        | 0.53                   | 162.74                     | 76.44      | 0.02                 | -62.56                   |
|                          | 0                        |  | 0                      |  | 1 uM             | 107.61       | 0.91                   | 107.04                     | 82.42      | 0.04                 | -41.03                   |
|                          | 0.1 uM                   |  | 0.1 uM                 |  | 10 uM            | 109.56       | 0.89                   | 110.25                     | 113.67     | 0.11                 | -11.87                   |
|                          | concentration            |  | concentration          |  |                  |              |                        |                            |            |                      |                          |

Compound

Normalized Values (A and B Sets)

Responses

| RVX-208 | Percent Green Cells (AB) |  | Percent Red Cells (AB) |  | Average Response                                                                                |              |                        |                            |            |                      |                          |
|---------|--------------------------|--|------------------------|--|-------------------------------------------------------------------------------------------------|--------------|------------------------|----------------------------|------------|----------------------|--------------------------|
|         | Percent Response         |  | Percent Response       |  | Dose                                                                                            | Green Signal | Actual Pct Green Cells | Normalized Pct Green Cells | Red Signal | Actual Pct Red Cells | Normalized Pct Red Cells |
|         | 100                      |  | 100                    |  | 0.1 uM                                                                                          | 101.48       | 0.88                   | 95.37                      | 81.18      | 0.06                 | -39.75                   |
|         | 0                        |  | 0                      |  | 1 uM                                                                                            | 96.51        | 0.88                   | 190.72                     | 81.80      | 0.05                 | -25.95                   |
|         | 0.1 uM                   |  | 0.1 uM                 |  | 10 uM <td>80.98</td> <td>0.79</td> <th>-19.58</th> <th>88.34</th> <th>0.08</th> <th>-16.30</th> | 80.98        | 0.79                   | -19.58                     | 88.34      | 0.08                 | -16.30                   |
|         | concentration            |  | concentration          |  |                                                                                                 |              |                        |                            |            |                      |                          |

Compound

Normalized Values (A and B Sets)

Responses

| S- (+)-Rolipram | Percent Green Cells (AB) |  | Percent Red Cells (AB) |  | Average Response |              |                        |                            |            |                      |                          |
|-----------------|--------------------------|--|------------------------|--|------------------|--------------|------------------------|----------------------------|------------|----------------------|--------------------------|
|                 | Percent Response         |  | Percent Response       |  | Dose             | Green Signal | Actual Pct Green Cells | Normalized Pct Green Cells | Red Signal | Actual Pct Red Cells | Normalized Pct Red Cells |
|                 | 100                      |  | 100                    |  | 0.1 uM           | 97.69        | 0.89                   | 99.99                      | 80.63      | 0.03                 | -57.36                   |
|                 | 0                        |  | 0                      |  | 1 uM             | 98.00        | 0.91                   | 110.01                     | 97.38      | 0.10                 | -3.71                    |
|                 | 0.1 uM                   |  | 0.1 uM                 |  | 10 uM            | 87.61        | 0.86                   | 49.20                      | 76.35      | 0.04                 | -34.56                   |
|                 | concentration            |  | concentration          |  |                  |              |                        |                            |            |                      |                          |

Compound

Normalized Values (A and B Sets)

Responses

| S-Ruxolitinib (INCB018424) | Percent Green Cells (AB) |  | Percent Red Cells (AB) |  | Average Response |              |                        |                            |            |                      |                          |
|----------------------------|--------------------------|--|------------------------|--|------------------|--------------|------------------------|----------------------------|------------|----------------------|--------------------------|
|                            | Percent Response         |  | Percent Response       |  | Dose             | Green Signal | Actual Pct Green Cells | Normalized Pct Green Cells | Red Signal | Actual Pct Red Cells | Normalized Pct Red Cells |
|                            | 100                      |  | 100                    |  | 0.1 uM           | 85.26        | 0.83                   | 52.29                      | 82.21      | 0.07                 | -26.51                   |
|                            | 0                        |  | 0                      |  | 1 uM             | 89.08        | 0.77                   | 27.76                      | 60.67      | 0.01                 | -63.96                   |
|                            | 0.1 uM                   |  | 0.1 uM                 |  | 10 uM            | 95.67        | 0.79                   | 94.95                      | 87.09      | 0.05                 | -36.40                   |
|                            | 1 uM                     |  | 1 uM                   |  |                  |              |                        |                            |            |                      |                          |
|                            | 10 uM                    |  | 10 uM                  |  |                  |              |                        |                            |            |                      |                          |

Compound

Normalized Values (A and B Sets)

Responses

| S3I-201 | Percent Green Cells (AB) |  | Percent Red Cells (AB) |  | Average Response |              |                        |                            |            |                      |                          |
|---------|--------------------------|--|------------------------|--|------------------|--------------|------------------------|----------------------------|------------|----------------------|--------------------------|
|         | Percent Response         |  | Percent Response       |  | Dose             | Green Signal | Actual Pct Green Cells | Normalized Pct Green Cells | Red Signal | Actual Pct Red Cells | Normalized Pct Red Cells |
|         | 100                      |  | 100                    |  | 0.1 uM           | 87.24        | 0.81                   | 33.67                      | 99.97      | 0.07                 | -41.80                   |
|         | 0                        |  | 0                      |  | 1 uM             | 92.85        | 0.81                   | 8.35                       | 69.12      | 0.01                 | -54.00                   |
|         | 0.1 uM                   |  | 0.1 uM                 |  | 10 uM            | 95.96        | 0.81                   | 53.14                      | 98.21      | 0.05                 | -34.09                   |
|         | 1 uM                     |  | 1 uM                   |  |                  |              |                        |                            |            |                      |                          |
|         | 10 uM                    |  | 10 uM                  |  |                  |              |                        |                            |            |                      |                          |

Compound

Normalized Values (A and B Sets)

Responses

| SA4503 | Percent Green Cells (AB) |  | Percent Red Cells (AB) |  | Average Response |              |                        |                            |            |                      |                          |
|--------|--------------------------|--|------------------------|--|------------------|--------------|------------------------|----------------------------|------------|----------------------|--------------------------|
|        | Percent Response         |  | Percent Response       |  | Dose             | Green Signal | Actual Pct Green Cells | Normalized Pct Green Cells | Red Signal | Actual Pct Red Cells | Normalized Pct Red Cells |
|        | 100                      |  | 100                    |  | 0.1 uM           | 76.24        | 0.67                   | -87.16                     | 72.61      | 0.02                 | -64.23                   |
|        | 0                        |  | 0                      |  | 1 uM             | 97.50        | 0.88                   | 126.94                     | 63.80      | 0.01                 | -44.57                   |
|        | 0.1 uM                   |  | 0.1 uM                 |  | 10 uM            | 105.02       | 0.93                   | 112.75                     | 93.45      | 0.09                 | -9.43                    |
|        | 1 uM                     |  | 1 uM                   |  |                  |              |                        |                            |            |                      |                          |
|        | 10 uM                    |  | 10 uM                  |  |                  |              |                        |                            |            |                      |                          |

Compound

Normalized Values (A and B Sets)

Responses

| Safinamide Mesylate | Percent Green Cells (AB) |  | Percent Red Cells (AB) |  | Average Response |              |                        |                            |            |                      |                          |
|---------------------|--------------------------|--|------------------------|--|------------------|--------------|------------------------|----------------------------|------------|----------------------|--------------------------|
|                     | Percent Response         |  | Percent Response       |  | Dose             | Green Signal | Actual Pct Green Cells | Normalized Pct Green Cells | Red Signal | Actual Pct Red Cells | Normalized Pct Red Cells |
|                     | 100                      |  | 100                    |  | 0.1 uM           | 80.35        | 0.54                   | -235.70                    | 85.93      | 0.06                 | -39.42                   |
|                     | 0                        |  | 0                      |  | 1 uM             | 82.64        | 0.68                   | 1004.47                    | 96.33      | 0.14                 | 23.26                    |
|                     | 0.1 uM                   |  | 0.1 uM                 |  | 10 uM            | 103.47       | 0.94                   | 117.96                     | 91.83      | 0.12                 | 3.14                     |
|                     | 1 uM                     |  | 1 uM                   |  |                  |              |                        |                            |            |                      |                          |
|                     | 10 uM                    |  | 10 uM                  |  |                  |              |                        |                            |            |                      |                          |

Compound

Normalized Values (A and B Sets)

Responses

| Salidroside | Percent Green Cells (AB) |  | Percent Red Cells (AB) |  | Average Response |              |                        |                            |            |                      |                          |
|-------------|--------------------------|--|------------------------|--|------------------|--------------|------------------------|----------------------------|------------|----------------------|--------------------------|
|             | Percent Response         |  | Percent Response       |  | Dose             | Green Signal | Actual Pct Green Cells | Normalized Pct Green Cells | Red Signal | Actual Pct Red Cells | Normalized Pct Red Cells |
|             | 100                      |  | 100                    |  | 0.1 uM           | 93.85        | 0.88                   | 84.38                      | 67.23      | 0.03                 | -40.06                   |
|             | 0                        |  | 0                      |  | 1 uM             | 89.97        | 0.78                   | 37.38                      | 71.69      | 0.01                 | -49.48                   |
|             | 0.1 uM                   |  | 0.1 uM                 |  |                  |              |                        |                            |            |                      |                          |
|             | 1 uM                     |  | 1 uM                   |  |                  |              |                        |                            |            |                      |                          |
|             | 10 uM                    |  | 10 uM                  |  |                  |              |                        |                            |            |                      |                          |



Compound

Normalized Values (A and B Sets)

Responses

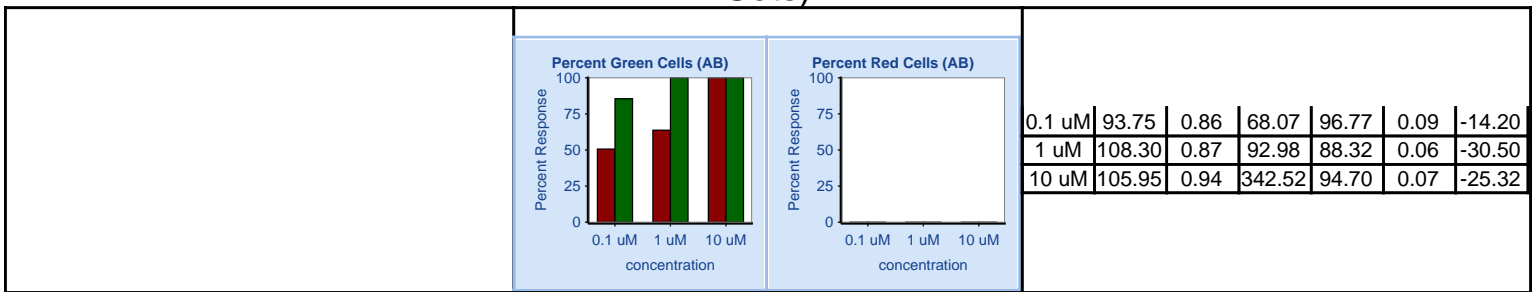

Compound

Normalized Values (A and B Sets)

Responses

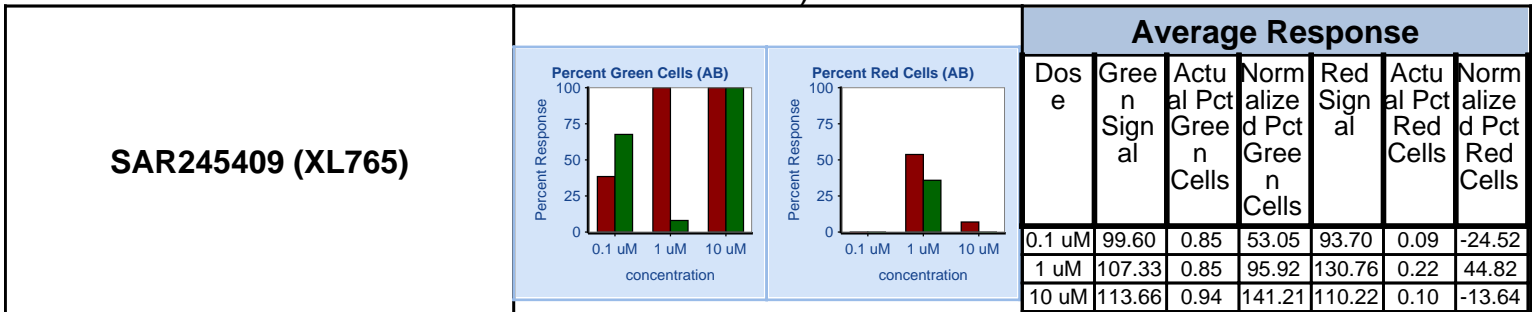

Compound

Normalized Values (A and B Sets)

Responses

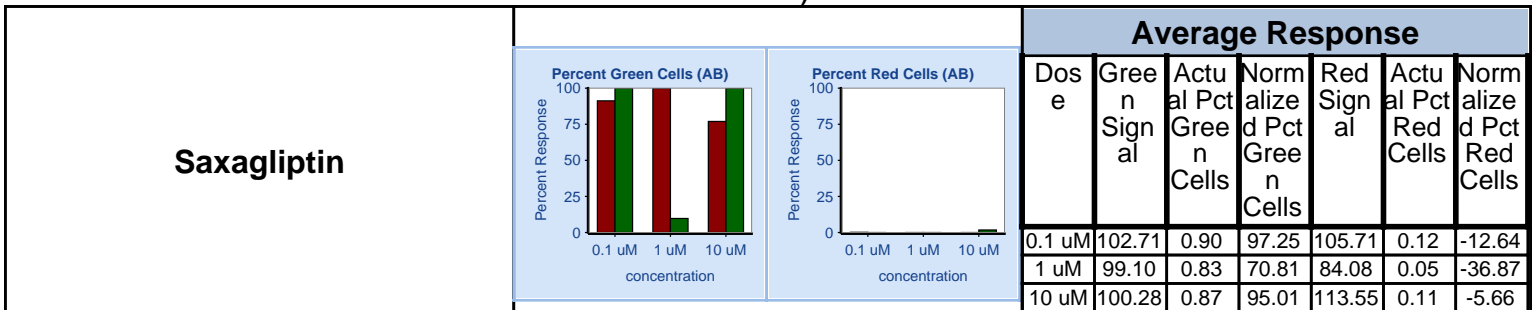

Compound

Normalized Values (A and B Sets)

Responses

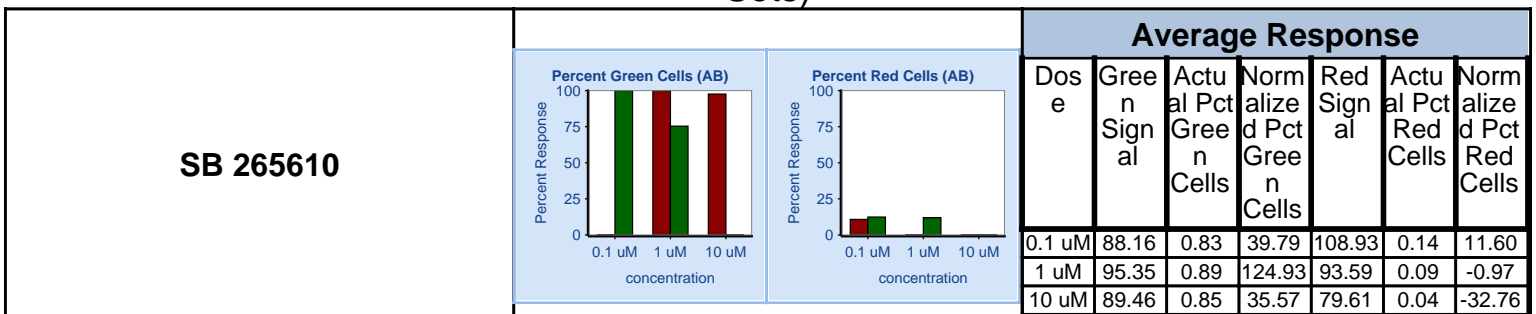

Compound

Normalized Values (A and B Sets)

Responses

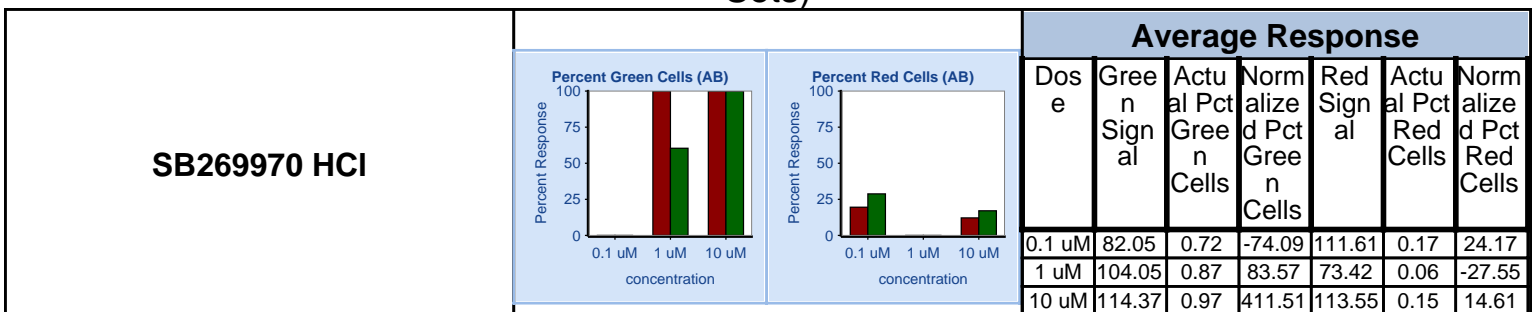

Compound

Normalized Values (A and B Sets)

Responses

| SB271046 | Percent Green Cells (AB) |      | Percent Red Cells (AB) |        | Average Response |              |                        |                            |            |                      |                          |       |       |
|----------|--------------------------|------|------------------------|--------|------------------|--------------|------------------------|----------------------------|------------|----------------------|--------------------------|-------|-------|
|          | Percent Response         |      | Percent Response       |        | Dose             | Green Signal | Actual Pct Green Cells | Normalized Pct Green Cells | Red Signal | Actual Pct Red Cells | Normalized Pct Red Cells |       |       |
|          | concentration            |      | concentration          |        | 0.1 uM           | 1 uM         | 10 uM                  | 0.1 uM                     | 1 uM       | 10 uM                | 0.1 uM                   | 1 uM  | 10 uM |
|          | 0.1 uM                   | 1 uM | 10 uM                  | 0.1 uM | 1 uM             | 10 uM        | 0.1 uM                 | 1 uM                       | 10 uM      | 0.1 uM               | 1 uM                     | 10 uM |       |
|          | 100                      | 100  | 100                    | 0      | 0.1 uM           | 103.31       | 0.92                   | 126.96                     | 78.15      | 0.02                 | -62.78                   |       |       |
|          | 0                        | 0    | 0                      | 0      | 1 uM             | 81.17        | 0.71                   | 664.64                     | 75.98      | 0.03                 | -33.95                   |       |       |
|          | 0                        | 0    | 0                      | 0      | 10 uM            | 101.37       | 0.91                   | 97.66                      | 68.93      | 0.02                 | -40.91                   |       |       |

Compound

Normalized Values (A and B Sets)

Responses

| SB408124 | Percent Green Cells (AB) |      | Percent Red Cells (AB) |        | Average Response |              |                        |                            |            |                      |                          |       |       |
|----------|--------------------------|------|------------------------|--------|------------------|--------------|------------------------|----------------------------|------------|----------------------|--------------------------|-------|-------|
|          | Percent Response         |      | Percent Response       |        | Dose             | Green Signal | Actual Pct Green Cells | Normalized Pct Green Cells | Red Signal | Actual Pct Red Cells | Normalized Pct Red Cells |       |       |
|          | concentration            |      | concentration          |        | 0.1 uM           | 1 uM         | 10 uM                  | 0.1 uM                     | 1 uM       | 10 uM                | 0.1 uM                   | 1 uM  | 10 uM |
|          | 0.1 uM                   | 1 uM | 10 uM                  | 0.1 uM | 1 uM             | 10 uM        | 0.1 uM                 | 1 uM                       | 10 uM      | 0.1 uM               | 1 uM                     | 10 uM |       |
|          | 75                       | 40   | 100                    | 0      | 0.1 uM           | 96.26        | 0.85                   | 60.75                      | 80.90      | 0.03                 | -57.72                   |       |       |
|          | 100                      | 90   | 100                    | 0      | 1 uM             | 101.98       | 0.89                   | 101.20                     | 84.79      | 0.04                 | -41.43                   |       |       |
|          | 0                        | 0    | 0                      | 10     | 10 uM            | 106.13       | 0.87                   | 93.22                      | 112.15     | 0.10                 | -14.91                   |       |       |

Compound

Normalized Values (A and B Sets)

Responses

| SB415286 | Percent Green Cells (AB) |      | Percent Red Cells (AB) |        | Average Response |              |                        |                            |            |                      |                          |       |       |
|----------|--------------------------|------|------------------------|--------|------------------|--------------|------------------------|----------------------------|------------|----------------------|--------------------------|-------|-------|
|          | Percent Response         |      | Percent Response       |        | Dose             | Green Signal | Actual Pct Green Cells | Normalized Pct Green Cells | Red Signal | Actual Pct Red Cells | Normalized Pct Red Cells |       |       |
|          | concentration            |      | concentration          |        | 0.1 uM           | 1 uM         | 10 uM                  | 0.1 uM                     | 1 uM       | 10 uM                | 0.1 uM                   | 1 uM  | 10 uM |
|          | 0.1 uM                   | 1 uM | 10 uM                  | 0.1 uM | 1 uM             | 10 uM        | 0.1 uM                 | 1 uM                       | 10 uM      | 0.1 uM               | 1 uM                     | 10 uM |       |
|          | 100                      | 75   | 90                     | 0      | 0.1 uM           | 104.37       | 0.92                   | 118.29                     | 92.11      | 0.08                 | -17.97                   |       |       |
|          | 0                        | 0    | 0                      | 0      | 1 uM             | 106.39       | 0.87                   | 88.05                      | 84.11      | 0.04                 | -37.58                   |       |       |
|          | 0                        | 0    | 0                      | 0      | 10 uM            | 107.23       | 0.93                   | 186.76                     | 86.53      | 0.05                 | -35.13                   |       |       |

Compound

Normalized Values (A and B Sets)

Responses

| SB505124 | Percent Green Cells (AB) |      | Percent Red Cells (AB) |        | Average Response |              |                        |                            |            |                      |                          |       |       |
|----------|--------------------------|------|------------------------|--------|------------------|--------------|------------------------|----------------------------|------------|----------------------|--------------------------|-------|-------|
|          | Percent Response         |      | Percent Response       |        | Dose             | Green Signal | Actual Pct Green Cells | Normalized Pct Green Cells | Red Signal | Actual Pct Red Cells | Normalized Pct Red Cells |       |       |
|          | concentration            |      | concentration          |        | 0.1 uM           | 1 uM         | 10 uM                  | 0.1 uM                     | 1 uM       | 10 uM                | 0.1 uM                   | 1 uM  | 10 uM |
|          | 0.1 uM                   | 1 uM | 10 uM                  | 0.1 uM | 1 uM             | 10 uM        | 0.1 uM                 | 1 uM                       | 10 uM      | 0.1 uM               | 1 uM                     | 10 uM |       |
|          | 100                      | 100  | 25                     | 0      | 0.1 uM           | 99.10        | 0.90                   | 110.76                     | 66.22      | 0.01                 | -47.82                   |       |       |
|          | 0                        | 0    | 0                      | 0      | 1 uM             | 90.19        | 0.76                   | 30.91                      | 84.04      | 0.06                 | -29.56                   |       |       |
|          | 0                        | 0    | 0                      | 0      | 10 uM            | 96.70        | 0.92                   | 111.27                     | 86.76      | 0.05                 | -36.75                   |       |       |

Compound

Normalized Values (A and B Sets)

Responses

| SB525334 | Percent Green Cells (AB) |      | Percent Red Cells (AB) |        | Average Response |              |                        |                            |            |                      |                          |       |       |
|----------|--------------------------|------|------------------------|--------|------------------|--------------|------------------------|----------------------------|------------|----------------------|--------------------------|-------|-------|
|          | Percent Response         |      | Percent Response       |        | Dose             | Green Signal | Actual Pct Green Cells | Normalized Pct Green Cells | Red Signal | Actual Pct Red Cells | Normalized Pct Red Cells |       |       |
|          | concentration            |      | concentration          |        | 0.1 uM           | 1 uM         | 10 uM                  | 0.1 uM                     | 1 uM       | 10 uM                | 0.1 uM                   | 1 uM  | 10 uM |
|          | 0.1 uM                   | 1 uM | 10 uM                  | 0.1 uM | 1 uM             | 10 uM        | 0.1 uM                 | 1 uM                       | 10 uM      | 0.1 uM               | 1 uM                     | 10 uM |       |
|          | 100                      | 100  | 75                     | 10     | 0.1 uM           | 105.53       | 0.92                   | 115.56                     | 104.59     | 0.11                 | -19.57                   |       |       |
|          | 0                        | 0    | 0                      | 0      | 1 uM             | 115.53       | 0.91                   | 101.36                     | 93.09      | 0.07                 | -26.62                   |       |       |
|          | 0                        | 0    | 0                      | 0      | 10 uM            | 97.01        | 0.83                   | 64.42                      | 103.16     | 0.07                 | -23.82                   |       |       |

Compound

Normalized Values (A and B Sets)

Responses

| SB590885 | Percent Green Cells (AB) |  | Percent Red Cells (AB) |  | Average Response |              |                        |                            |            |                      |                          |
|----------|--------------------------|--|------------------------|--|------------------|--------------|------------------------|----------------------------|------------|----------------------|--------------------------|
|          | Percent Response         |  | Percent Response       |  | Dose             | Green Signal | Actual Pct Green Cells | Normalized Pct Green Cells | Red Signal | Actual Pct Red Cells | Normalized Pct Red Cells |
|          | 100                      |  | 100                    |  | 0.1 uM           | 96.41        | 0.89                   | 95.50                      | 89.68      | 0.07                 | -24.70                   |
|          | 0                        |  | 0                      |  | 1 uM             | 99.19        | 0.83                   | 74.92                      | 89.31      | 0.05                 | -32.52                   |
|          | 0.1 uM                   |  | 0.1 uM                 |  | 10 uM            | 105.34       | 0.97                   | 554.19                     | 89.81      | 0.04                 | -38.90                   |

Compound

Normalized Values (A and B Sets)

Responses

| SB705498 | Percent Green Cells (AB) |  | Percent Red Cells (AB) |  | Average Response |              |                        |                            |            |                      |                          |
|----------|--------------------------|--|------------------------|--|------------------|--------------|------------------------|----------------------------|------------|----------------------|--------------------------|
|          | Percent Response         |  | Percent Response       |  | Dose             | Green Signal | Actual Pct Green Cells | Normalized Pct Green Cells | Red Signal | Actual Pct Red Cells | Normalized Pct Red Cells |
|          | 100                      |  | 100                    |  | 0.1 uM           | 109.08       | 0.93                   | 134.86                     | 95.06      | 0.13                 | 7.85                     |
|          | 0                        |  | 0                      |  | 1 uM             | 102.85       | 0.85                   | 79.56                      | 117.80     | 0.20                 | 32.53                    |
|          | 0.1 uM                   |  | 0.1 uM                 |  | 10 uM            | 96.19        | 0.91                   | 297.99                     | 91.23      | 0.08                 | -21.84                   |

Compound

Normalized Values (A and B Sets)

Responses

| SB742457 | Percent Green Cells (AB) |  | Percent Red Cells (AB) |  | Average Response |              |                        |                            |            |                      |                          |
|----------|--------------------------|--|------------------------|--|------------------|--------------|------------------------|----------------------------|------------|----------------------|--------------------------|
|          | Percent Response         |  | Percent Response       |  | Dose             | Green Signal | Actual Pct Green Cells | Normalized Pct Green Cells | Red Signal | Actual Pct Red Cells | Normalized Pct Red Cells |
|          | 100                      |  | 100                    |  | 0.1 uM           | 91.72        | 0.88                   | 142.10                     | 73.39      | 0.01                 | -57.35                   |
|          | 0                        |  | 0                      |  | 1 uM             | 71.38        | 0.53                   | 132.30                     | 77.27      | 0.04                 | -46.45                   |
|          | 0.1 uM                   |  | 0.1 uM                 |  | 10 uM            | 92.04        | 0.80                   | 61.29                      | 90.66      | 0.05                 | -38.85                   |

Compound

Normalized Values (A and B Sets)

Responses

| SB743921 | Percent Green Cells (AB) |  | Percent Red Cells (AB) |  | Average Response |              |                        |                            |            |                      |                          |
|----------|--------------------------|--|------------------------|--|------------------|--------------|------------------------|----------------------------|------------|----------------------|--------------------------|
|          | Percent Response         |  | Percent Response       |  | Dose             | Green Signal | Actual Pct Green Cells | Normalized Pct Green Cells | Red Signal | Actual Pct Red Cells | Normalized Pct Red Cells |
|          | 100                      |  | 100                    |  | 0.1 uM           | 103.59       | 0.86                   | 70.48                      | 101.19     | 0.14                 | 7.40                     |
|          | 0                        |  | 0                      |  | 1 uM             | 111.56       | 0.82                   | 68.87                      | 131.97     | 0.25                 | 55.48                    |
|          | 0.1 uM                   |  | 0.1 uM                 |  | 10 uM            | 97.47        | 0.92                   | 151.41                     | 113.23     | 0.11                 | -6.53                    |

Compound

Normalized Values (A and B Sets)

Responses

| SC-514 | Percent Green Cells (AB) |  | Percent Red Cells (AB) |  | Average Response |              |                        |                            |            |                      |                          |
|--------|--------------------------|--|------------------------|--|------------------|--------------|------------------------|----------------------------|------------|----------------------|--------------------------|
|        | Percent Response         |  | Percent Response       |  | Dose             | Green Signal | Actual Pct Green Cells | Normalized Pct Green Cells | Red Signal | Actual Pct Red Cells | Normalized Pct Red Cells |
|        | 100                      |  | 100                    |  | 0.1 uM           | 94.89        | 0.89                   | 68.26                      | 90.67      | 0.09                 | -17.64                   |
|        | 0                        |  | 0                      |  | 1 uM             | 94.31        | 0.74                   | 19.73                      | 98.15      | 0.12                 | -7.84                    |
|        | 0.1 uM                   |  | 0.1 uM                 |  | 10 uM            | 108.09       | 0.87                   | 132.12                     | 86.32      | 0.07                 | -28.21                   |



Compound

Normalized Values (A and B Sets)

Responses

| SC144 | 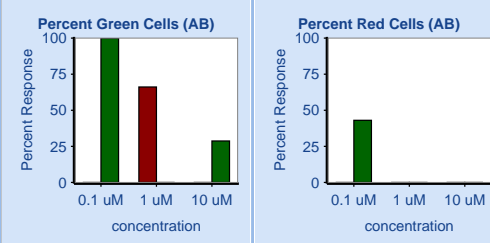 |      | Average Response |              |                        |                            |            |                      |                          |
|-------|------------------------------------------------------------------------------------|------|------------------|--------------|------------------------|----------------------------|------------|----------------------|--------------------------|
|       |                                                                                    |      | Dose             | Green Signal | Actual Pct Green Cells | Normalized Pct Green Cells | Red Signal | Actual Pct Red Cells | Normalized Pct Red Cells |
|       |                                                                                    |      | 0.1 uM           | 102.93       | 0.87                   | -64.35                     | 99.32      | 0.14                 | 7.62                     |
|       |                                                                                    |      | 1 uM             | 93.46        | 0.73                   | 4.65                       | 83.96      | 0.06                 | -36.46                   |
| 10 uM | 86.64                                                                              | 0.68 | -126.76          | 87.81        | 0.05                   | -36.31                     |            |                      |                          |

Compound

Normalized Values (A and B Sets)

Responses

| SCH 79797 | 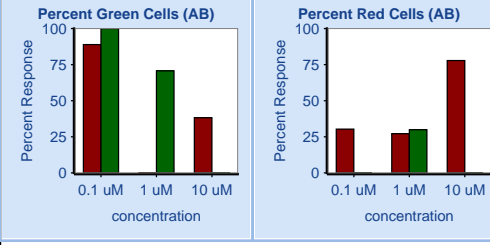 |      | Average Response |              |                        |                            |            |                      |                          |
|-----------|------------------------------------------------------------------------------------|------|------------------|--------------|------------------------|----------------------------|------------|----------------------|--------------------------|
|           |                                                                                    |      | Dose             | Green Signal | Actual Pct Green Cells | Normalized Pct Green Cells | Red Signal | Actual Pct Red Cells | Normalized Pct Red Cells |
|           |                                                                                    |      | 0.1 uM           | 106.76       | 0.91                   | 118.78                     | 103.42     | 0.12                 | 0.06                     |
|           |                                                                                    |      | 1 uM             | 104.31       | 0.85                   | -133.75                    | 110.16     | 0.17                 | 28.54                    |
| 10 uM     | 68.23                                                                              | 0.55 | -232.03          | 104.10       | 0.17                   | 27.81                      |            |                      |                          |

Compound

Normalized Values (A and B Sets)

Responses

| SCH527123 | 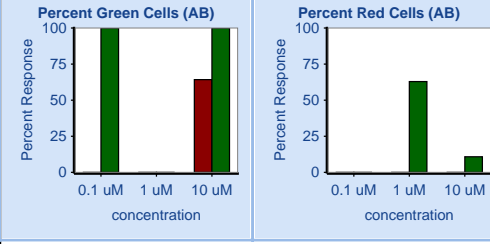 |      | Average Response |              |                        |                            |            |                      |                          |
|-----------|--------------------------------------------------------------------------------------|------|------------------|--------------|------------------------|----------------------------|------------|----------------------|--------------------------|
|           |                                                                                      |      | Dose             | Green Signal | Actual Pct Green Cells | Normalized Pct Green Cells | Red Signal | Actual Pct Red Cells | Normalized Pct Red Cells |
|           |                                                                                      |      | 0.1 uM           | 93.95        | 0.85                   | 58.37                      | 96.21      | 0.09                 | -22.05                   |
|           |                                                                                      |      | 1 uM             | 89.46        | 0.80                   | -165.64                    | 94.48      | 0.13                 | 25.02                    |
| 10 uM     | 96.67                                                                                | 0.91 | 86.98            | 86.40        | 0.09                   | -12.01                     |            |                      |                          |

Compound

Normalized Values (A and B Sets)

Responses

| SCH772984 | 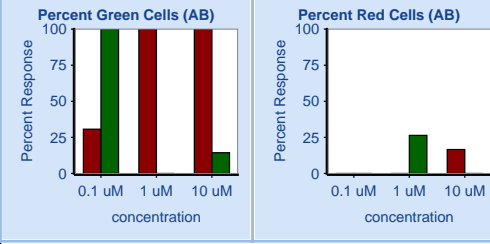 |      | Average Response |              |                        |                            |            |                      |                          |
|-----------|--------------------------------------------------------------------------------------|------|------------------|--------------|------------------------|----------------------------|------------|----------------------|--------------------------|
|           |                                                                                      |      | Dose             | Green Signal | Actual Pct Green Cells | Normalized Pct Green Cells | Red Signal | Actual Pct Red Cells | Normalized Pct Red Cells |
|           |                                                                                      |      | 0.1 uM           | 98.89        | 0.90                   | 70.26                      | 90.53      | 0.08                 | -21.95                   |
|           |                                                                                      |      | 1 uM             | 88.72        | 0.78                   | 40.21                      | 105.15     | 0.14                 | 4.31                     |
| 10 uM     | 108.38                                                                               | 0.84 | 139.33           | 101.97       | 0.12                   | 2.28                       |            |                      |                          |

Compound

Normalized Values (A and B Sets)

Responses

| Schisandrin B (Sch B) |  |  | Average Response |              |                        |                            |            |                      |                          |
|-----------------------|--|--|------------------|--------------|------------------------|----------------------------|------------|----------------------|--------------------------|
|                       |  |  | Dose             | Green Signal | Actual Pct Green Cells | Normalized Pct Green Cells | Red Signal | Actual Pct Red Cells | Normalized Pct Red Cells |
|                       |  |  | 0.1 uM           | 84.43        | 0.78                   | -130.24                    | 60.54      | 0.01                 | -59.59                   |

Compound

Normalized Values (A and B Sets)

Responses

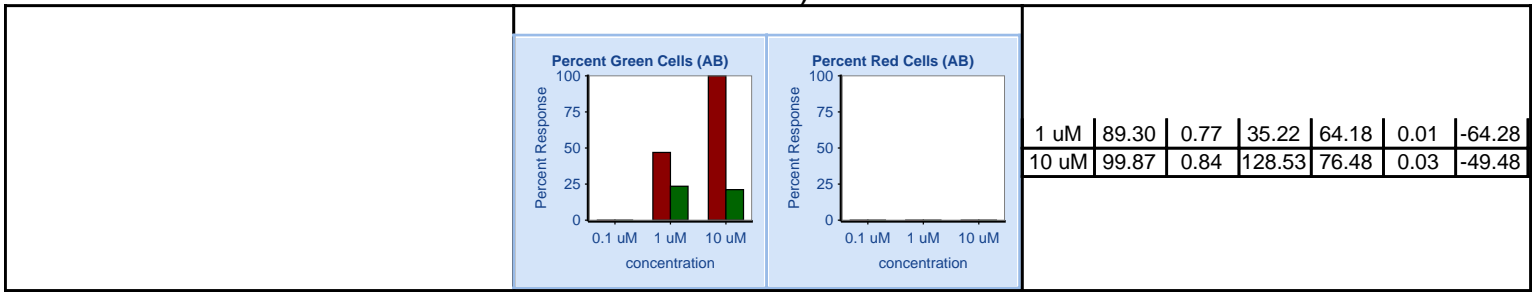

|       |       |      |        |       |      |        |
|-------|-------|------|--------|-------|------|--------|
| 1 uM  | 89.30 | 0.77 | 35.22  | 64.18 | 0.01 | -64.28 |
| 10 uM | 99.87 | 0.84 | 128.53 | 76.48 | 0.03 | -49.48 |

Compound

Normalized Values (A and B Sets)

Responses

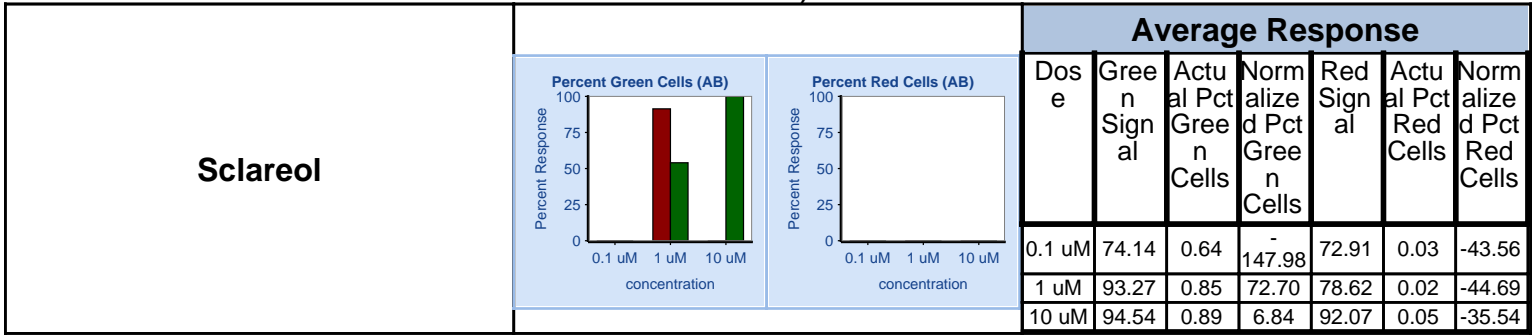

Sciareol

Average Response

| Dose   | Green Signal | Actual Pct Green Cells | Normalized Pct Green Cells | Red Signal | Actual Pct Red Cells | Normalized Pct Red Cells |
|--------|--------------|------------------------|----------------------------|------------|----------------------|--------------------------|
| 0.1 uM | 74.14        | 0.64                   | 147.98                     | 72.91      | 0.03                 | -43.56                   |
| 1 uM   | 93.27        | 0.85                   | 72.70                      | 78.62      | 0.02                 | -44.69                   |
| 10 uM  | 94.54        | 0.89                   | 6.84                       | 92.07      | 0.05                 | -35.54                   |

Compound

Normalized Values (A and B Sets)

Responses

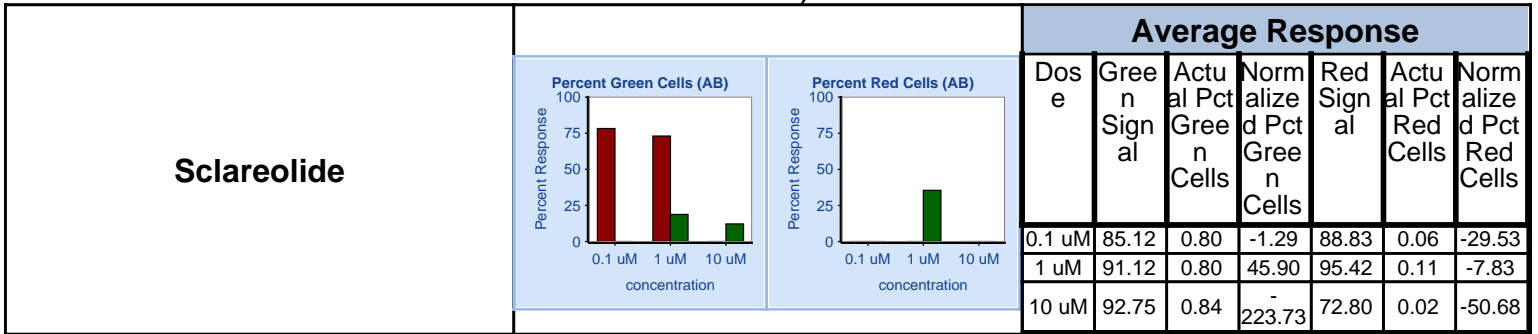

Sciareolide

Average Response

| Dose   | Green Signal | Actual Pct Green Cells | Normalized Pct Green Cells | Red Signal | Actual Pct Red Cells | Normalized Pct Red Cells |
|--------|--------------|------------------------|----------------------------|------------|----------------------|--------------------------|
| 0.1 uM | 85.12        | 0.80                   | -1.29                      | 88.83      | 0.06                 | -29.53                   |
| 1 uM   | 91.12        | 0.80                   | 45.90                      | 95.42      | 0.11                 | -7.83                    |
| 10 uM  | 92.75        | 0.84                   | 223.73                     | 72.80      | 0.02                 | -50.68                   |

Compound

Normalized Values (A and B Sets)

Responses

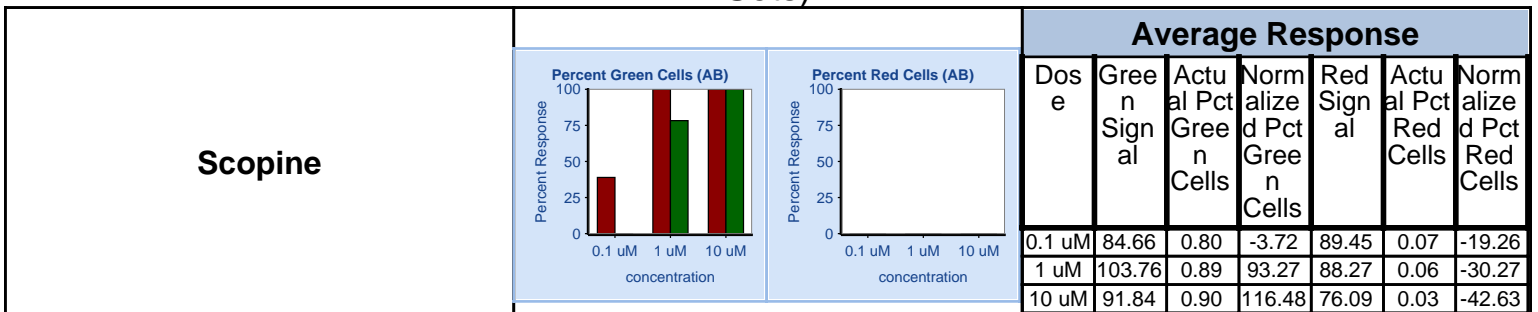

Scopine

Average Response

| Dose   | Green Signal | Actual Pct Green Cells | Normalized Pct Green Cells | Red Signal | Actual Pct Red Cells | Normalized Pct Red Cells |
|--------|--------------|------------------------|----------------------------|------------|----------------------|--------------------------|
| 0.1 uM | 84.66        | 0.80                   | -3.72                      | 89.45      | 0.07                 | -19.26                   |
| 1 uM   | 103.76       | 0.89                   | 93.27                      | 88.27      | 0.06                 | -30.27                   |
| 10 uM  | 91.84        | 0.90                   | 116.48                     | 76.09      | 0.03                 | -42.63                   |

Compound

Normalized Values (A and B Sets)

Responses

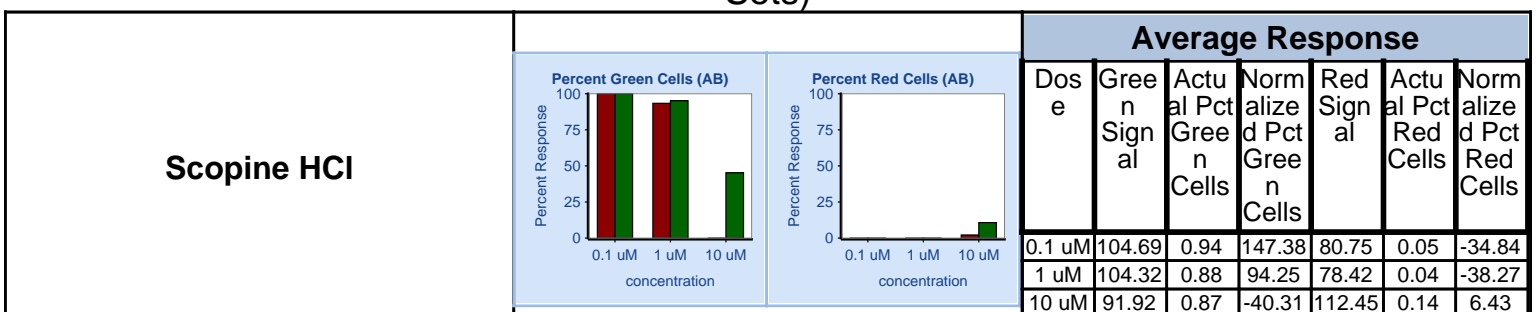

Scopine HCl

Average Response

| Dose   | Green Signal | Actual Pct Green Cells | Normalized Pct Green Cells | Red Signal | Actual Pct Red Cells | Normalized Pct Red Cells |
|--------|--------------|------------------------|----------------------------|------------|----------------------|--------------------------|
| 0.1 uM | 104.69       | 0.94                   | 147.38                     | 80.75      | 0.05                 | -34.84                   |
| 1 uM   | 104.32       | 0.88                   | 94.25                      | 78.42      | 0.04                 | -38.27                   |
| 10 uM  | 91.92        | 0.87                   | -40.31                     | 112.45     | 0.14                 | 6.43                     |

| Compound               | Normalized Values (A and B Sets) | Responses                                                                                                                                                                                                                                                                                                                                                                                                                                                                                                                                                                                                                                                                       |                  |                        |                            |            |                      |                          |  |      |              |                        |                            |            |                      |                          |        |       |      |       |       |      |       |      |       |      |       |        |      |       |       |        |      |        |       |      |        |
|------------------------|----------------------------------|---------------------------------------------------------------------------------------------------------------------------------------------------------------------------------------------------------------------------------------------------------------------------------------------------------------------------------------------------------------------------------------------------------------------------------------------------------------------------------------------------------------------------------------------------------------------------------------------------------------------------------------------------------------------------------|------------------|------------------------|----------------------------|------------|----------------------|--------------------------|--|------|--------------|------------------------|----------------------------|------------|----------------------|--------------------------|--------|-------|------|-------|-------|------|-------|------|-------|------|-------|--------|------|-------|-------|--------|------|--------|-------|------|--------|
| <b>Scopolamine HBr</b> |                                  | <table border="1"> <thead> <tr> <th colspan="7">Average Response</th> </tr> <tr> <th>Dose</th> <th>Green Signal</th> <th>Actual Pct Green Cells</th> <th>Normalized Pct Green Cells</th> <th>Red Signal</th> <th>Actual Pct Red Cells</th> <th>Normalized Pct Red Cells</th> </tr> </thead> <tbody> <tr> <td>0.1 uM</td> <td>92.25</td> <td>0.86</td> <td>59.38</td> <td>95.59</td> <td>0.11</td> <td>-8.37</td> </tr> <tr> <td>1 uM</td> <td>86.68</td> <td>0.72</td> <td>17.25</td> <td>114.84</td> <td>0.17</td> <td>18.21</td> </tr> <tr> <td>10 uM</td> <td>111.79</td> <td>0.93</td> <td>277.73</td> <td>87.99</td> <td>0.05</td> <td>-32.09</td> </tr> </tbody> </table> | Average Response |                        |                            |            |                      |                          |  | Dose | Green Signal | Actual Pct Green Cells | Normalized Pct Green Cells | Red Signal | Actual Pct Red Cells | Normalized Pct Red Cells | 0.1 uM | 92.25 | 0.86 | 59.38 | 95.59 | 0.11 | -8.37 | 1 uM | 86.68 | 0.72 | 17.25 | 114.84 | 0.17 | 18.21 | 10 uM | 111.79 | 0.93 | 277.73 | 87.99 | 0.05 | -32.09 |
|                        |                                  | Average Response                                                                                                                                                                                                                                                                                                                                                                                                                                                                                                                                                                                                                                                                |                  |                        |                            |            |                      |                          |  |      |              |                        |                            |            |                      |                          |        |       |      |       |       |      |       |      |       |      |       |        |      |       |       |        |      |        |       |      |        |
|                        |                                  | Dose                                                                                                                                                                                                                                                                                                                                                                                                                                                                                                                                                                                                                                                                            | Green Signal     | Actual Pct Green Cells | Normalized Pct Green Cells | Red Signal | Actual Pct Red Cells | Normalized Pct Red Cells |  |      |              |                        |                            |            |                      |                          |        |       |      |       |       |      |       |      |       |      |       |        |      |       |       |        |      |        |       |      |        |
|                        |                                  | 0.1 uM                                                                                                                                                                                                                                                                                                                                                                                                                                                                                                                                                                                                                                                                          | 92.25            | 0.86                   | 59.38                      | 95.59      | 0.11                 | -8.37                    |  |      |              |                        |                            |            |                      |                          |        |       |      |       |       |      |       |      |       |      |       |        |      |       |       |        |      |        |       |      |        |
| 1 uM                   | 86.68                            | 0.72                                                                                                                                                                                                                                                                                                                                                                                                                                                                                                                                                                                                                                                                            | 17.25            | 114.84                 | 0.17                       | 18.21      |                      |                          |  |      |              |                        |                            |            |                      |                          |        |       |      |       |       |      |       |      |       |      |       |        |      |       |       |        |      |        |       |      |        |
| 10 uM                  | 111.79                           | 0.93                                                                                                                                                                                                                                                                                                                                                                                                                                                                                                                                                                                                                                                                            | 277.73           | 87.99                  | 0.05                       | -32.09     |                      |                          |  |      |              |                        |                            |            |                      |                          |        |       |      |       |       |      |       |      |       |      |       |        |      |       |       |        |      |        |       |      |        |

| Compound         | Normalized Values (A and B Sets) | Responses                                                                                                                                                                                                                                                                                                                                                                                                                                                                                                                                                                                                                                                                       |                  |                        |                            |            |                      |                          |  |      |              |                        |                            |            |                      |                          |        |        |      |        |       |      |       |      |       |      |        |       |      |        |       |       |      |        |       |      |      |
|------------------|----------------------------------|---------------------------------------------------------------------------------------------------------------------------------------------------------------------------------------------------------------------------------------------------------------------------------------------------------------------------------------------------------------------------------------------------------------------------------------------------------------------------------------------------------------------------------------------------------------------------------------------------------------------------------------------------------------------------------|------------------|------------------------|----------------------------|------------|----------------------|--------------------------|--|------|--------------|------------------------|----------------------------|------------|----------------------|--------------------------|--------|--------|------|--------|-------|------|-------|------|-------|------|--------|-------|------|--------|-------|-------|------|--------|-------|------|------|
| <b>Scriptaid</b> |                                  | <table border="1"> <thead> <tr> <th colspan="7">Average Response</th> </tr> <tr> <th>Dose</th> <th>Green Signal</th> <th>Actual Pct Green Cells</th> <th>Normalized Pct Green Cells</th> <th>Red Signal</th> <th>Actual Pct Red Cells</th> <th>Normalized Pct Red Cells</th> </tr> </thead> <tbody> <tr> <td>0.1 uM</td> <td>112.98</td> <td>0.94</td> <td>147.49</td> <td>91.50</td> <td>0.11</td> <td>-9.03</td> </tr> <tr> <td>1 uM</td> <td>75.73</td> <td>0.68</td> <td>769.91</td> <td>63.28</td> <td>0.02</td> <td>-35.95</td> </tr> <tr> <td>10 uM</td> <td>95.20</td> <td>0.78</td> <td>-31.70</td> <td>92.04</td> <td>0.12</td> <td>2.96</td> </tr> </tbody> </table> | Average Response |                        |                            |            |                      |                          |  | Dose | Green Signal | Actual Pct Green Cells | Normalized Pct Green Cells | Red Signal | Actual Pct Red Cells | Normalized Pct Red Cells | 0.1 uM | 112.98 | 0.94 | 147.49 | 91.50 | 0.11 | -9.03 | 1 uM | 75.73 | 0.68 | 769.91 | 63.28 | 0.02 | -35.95 | 10 uM | 95.20 | 0.78 | -31.70 | 92.04 | 0.12 | 2.96 |
|                  |                                  | Average Response                                                                                                                                                                                                                                                                                                                                                                                                                                                                                                                                                                                                                                                                |                  |                        |                            |            |                      |                          |  |      |              |                        |                            |            |                      |                          |        |        |      |        |       |      |       |      |       |      |        |       |      |        |       |       |      |        |       |      |      |
|                  |                                  | Dose                                                                                                                                                                                                                                                                                                                                                                                                                                                                                                                                                                                                                                                                            | Green Signal     | Actual Pct Green Cells | Normalized Pct Green Cells | Red Signal | Actual Pct Red Cells | Normalized Pct Red Cells |  |      |              |                        |                            |            |                      |                          |        |        |      |        |       |      |       |      |       |      |        |       |      |        |       |       |      |        |       |      |      |
|                  |                                  | 0.1 uM                                                                                                                                                                                                                                                                                                                                                                                                                                                                                                                                                                                                                                                                          | 112.98           | 0.94                   | 147.49                     | 91.50      | 0.11                 | -9.03                    |  |      |              |                        |                            |            |                      |                          |        |        |      |        |       |      |       |      |       |      |        |       |      |        |       |       |      |        |       |      |      |
| 1 uM             | 75.73                            | 0.68                                                                                                                                                                                                                                                                                                                                                                                                                                                                                                                                                                                                                                                                            | 769.91           | 63.28                  | 0.02                       | -35.95     |                      |                          |  |      |              |                        |                            |            |                      |                          |        |        |      |        |       |      |       |      |       |      |        |       |      |        |       |       |      |        |       |      |      |
| 10 uM            | 95.20                            | 0.78                                                                                                                                                                                                                                                                                                                                                                                                                                                                                                                                                                                                                                                                            | -31.70           | 92.04                  | 0.12                       | 2.96       |                      |                          |  |      |              |                        |                            |            |                      |                          |        |        |      |        |       |      |       |      |       |      |        |       |      |        |       |       |      |        |       |      |      |

| Compound       | Normalized Values (A and B Sets) | Responses                                                                                                                                                                                                                                                                                                                                                                                                                                                                                                                                                                                                                                                                      |                  |                        |                            |            |                      |                          |  |      |              |                        |                            |            |                      |                          |        |       |      |       |       |      |        |      |       |      |        |       |      |       |       |       |      |       |       |      |        |
|----------------|----------------------------------|--------------------------------------------------------------------------------------------------------------------------------------------------------------------------------------------------------------------------------------------------------------------------------------------------------------------------------------------------------------------------------------------------------------------------------------------------------------------------------------------------------------------------------------------------------------------------------------------------------------------------------------------------------------------------------|------------------|------------------------|----------------------------|------------|----------------------|--------------------------|--|------|--------------|------------------------|----------------------------|------------|----------------------|--------------------------|--------|-------|------|-------|-------|------|--------|------|-------|------|--------|-------|------|-------|-------|-------|------|-------|-------|------|--------|
| <b>SecinH3</b> |                                  | <table border="1"> <thead> <tr> <th colspan="7">Average Response</th> </tr> <tr> <th>Dose</th> <th>Green Signal</th> <th>Actual Pct Green Cells</th> <th>Normalized Pct Green Cells</th> <th>Red Signal</th> <th>Actual Pct Red Cells</th> <th>Normalized Pct Red Cells</th> </tr> </thead> <tbody> <tr> <td>0.1 uM</td> <td>95.95</td> <td>0.88</td> <td>99.84</td> <td>68.09</td> <td>0.01</td> <td>-70.23</td> </tr> <tr> <td>1 uM</td> <td>91.78</td> <td>0.86</td> <td>102.19</td> <td>94.32</td> <td>0.08</td> <td>-3.98</td> </tr> <tr> <td>10 uM</td> <td>90.25</td> <td>0.85</td> <td>34.81</td> <td>76.98</td> <td>0.04</td> <td>-32.99</td> </tr> </tbody> </table> | Average Response |                        |                            |            |                      |                          |  | Dose | Green Signal | Actual Pct Green Cells | Normalized Pct Green Cells | Red Signal | Actual Pct Red Cells | Normalized Pct Red Cells | 0.1 uM | 95.95 | 0.88 | 99.84 | 68.09 | 0.01 | -70.23 | 1 uM | 91.78 | 0.86 | 102.19 | 94.32 | 0.08 | -3.98 | 10 uM | 90.25 | 0.85 | 34.81 | 76.98 | 0.04 | -32.99 |
|                |                                  | Average Response                                                                                                                                                                                                                                                                                                                                                                                                                                                                                                                                                                                                                                                               |                  |                        |                            |            |                      |                          |  |      |              |                        |                            |            |                      |                          |        |       |      |       |       |      |        |      |       |      |        |       |      |       |       |       |      |       |       |      |        |
|                |                                  | Dose                                                                                                                                                                                                                                                                                                                                                                                                                                                                                                                                                                                                                                                                           | Green Signal     | Actual Pct Green Cells | Normalized Pct Green Cells | Red Signal | Actual Pct Red Cells | Normalized Pct Red Cells |  |      |              |                        |                            |            |                      |                          |        |       |      |       |       |      |        |      |       |      |        |       |      |       |       |       |      |       |       |      |        |
|                |                                  | 0.1 uM                                                                                                                                                                                                                                                                                                                                                                                                                                                                                                                                                                                                                                                                         | 95.95            | 0.88                   | 99.84                      | 68.09      | 0.01                 | -70.23                   |  |      |              |                        |                            |            |                      |                          |        |       |      |       |       |      |        |      |       |      |        |       |      |       |       |       |      |       |       |      |        |
| 1 uM           | 91.78                            | 0.86                                                                                                                                                                                                                                                                                                                                                                                                                                                                                                                                                                                                                                                                           | 102.19           | 94.32                  | 0.08                       | -3.98      |                      |                          |  |      |              |                        |                            |            |                      |                          |        |       |      |       |       |      |        |      |       |      |        |       |      |       |       |       |      |       |       |      |        |
| 10 uM          | 90.25                            | 0.85                                                                                                                                                                                                                                                                                                                                                                                                                                                                                                                                                                                                                                                                           | 34.81            | 76.98                  | 0.04                       | -32.99     |                      |                          |  |      |              |                        |                            |            |                      |                          |        |       |      |       |       |      |        |      |       |      |        |       |      |       |       |       |      |       |       |      |        |

| Compound                       | Normalized Values (A and B Sets) | Responses                                                                                                                                                                                                                                                                                                                                                                                                                                                                                                                                                                                                                                                                           |                  |                        |                            |            |                      |                          |  |      |              |                        |                            |            |                      |                          |        |        |      |        |       |      |        |      |        |      |        |       |      |        |       |       |      |       |        |      |        |
|--------------------------------|----------------------------------|-------------------------------------------------------------------------------------------------------------------------------------------------------------------------------------------------------------------------------------------------------------------------------------------------------------------------------------------------------------------------------------------------------------------------------------------------------------------------------------------------------------------------------------------------------------------------------------------------------------------------------------------------------------------------------------|------------------|------------------------|----------------------------|------------|----------------------|--------------------------|--|------|--------------|------------------------|----------------------------|------------|----------------------|--------------------------|--------|--------|------|--------|-------|------|--------|------|--------|------|--------|-------|------|--------|-------|-------|------|-------|--------|------|--------|
| <b>Semagacestat (LY450139)</b> |                                  | <table border="1"> <thead> <tr> <th colspan="7">Average Response</th> </tr> <tr> <th>Dose</th> <th>Green Signal</th> <th>Actual Pct Green Cells</th> <th>Normalized Pct Green Cells</th> <th>Red Signal</th> <th>Actual Pct Red Cells</th> <th>Normalized Pct Red Cells</th> </tr> </thead> <tbody> <tr> <td>0.1 uM</td> <td>117.01</td> <td>0.94</td> <td>137.32</td> <td>93.23</td> <td>0.07</td> <td>-37.33</td> </tr> <tr> <td>1 uM</td> <td>111.39</td> <td>0.93</td> <td>129.42</td> <td>91.06</td> <td>0.07</td> <td>-25.71</td> </tr> <tr> <td>10 uM</td> <td>99.18</td> <td>0.83</td> <td>64.98</td> <td>114.41</td> <td>0.10</td> <td>-11.94</td> </tr> </tbody> </table> | Average Response |                        |                            |            |                      |                          |  | Dose | Green Signal | Actual Pct Green Cells | Normalized Pct Green Cells | Red Signal | Actual Pct Red Cells | Normalized Pct Red Cells | 0.1 uM | 117.01 | 0.94 | 137.32 | 93.23 | 0.07 | -37.33 | 1 uM | 111.39 | 0.93 | 129.42 | 91.06 | 0.07 | -25.71 | 10 uM | 99.18 | 0.83 | 64.98 | 114.41 | 0.10 | -11.94 |
|                                |                                  | Average Response                                                                                                                                                                                                                                                                                                                                                                                                                                                                                                                                                                                                                                                                    |                  |                        |                            |            |                      |                          |  |      |              |                        |                            |            |                      |                          |        |        |      |        |       |      |        |      |        |      |        |       |      |        |       |       |      |       |        |      |        |
|                                |                                  | Dose                                                                                                                                                                                                                                                                                                                                                                                                                                                                                                                                                                                                                                                                                | Green Signal     | Actual Pct Green Cells | Normalized Pct Green Cells | Red Signal | Actual Pct Red Cells | Normalized Pct Red Cells |  |      |              |                        |                            |            |                      |                          |        |        |      |        |       |      |        |      |        |      |        |       |      |        |       |       |      |       |        |      |        |
|                                |                                  | 0.1 uM                                                                                                                                                                                                                                                                                                                                                                                                                                                                                                                                                                                                                                                                              | 117.01           | 0.94                   | 137.32                     | 93.23      | 0.07                 | -37.33                   |  |      |              |                        |                            |            |                      |                          |        |        |      |        |       |      |        |      |        |      |        |       |      |        |       |       |      |       |        |      |        |
| 1 uM                           | 111.39                           | 0.93                                                                                                                                                                                                                                                                                                                                                                                                                                                                                                                                                                                                                                                                                | 129.42           | 91.06                  | 0.07                       | -25.71     |                      |                          |  |      |              |                        |                            |            |                      |                          |        |        |      |        |       |      |        |      |        |      |        |       |      |        |       |       |      |       |        |      |        |
| 10 uM                          | 99.18                            | 0.83                                                                                                                                                                                                                                                                                                                                                                                                                                                                                                                                                                                                                                                                                | 64.98            | 114.41                 | 0.10                       | -11.94     |                      |                          |  |      |              |                        |                            |            |                      |                          |        |        |      |        |       |      |        |      |        |      |        |       |      |        |       |       |      |       |        |      |        |

| Compound                     | Normalized Values (A and B Sets) | Responses                                                                                                                                                                                                                                                                                                                                                                                                                                                                                                                                                                                                                                                                        |                  |                        |                            |            |                      |                          |  |      |              |                        |                            |            |                      |                          |        |       |      |       |       |      |        |      |       |      |       |        |      |       |       |        |      |        |       |      |        |
|------------------------------|----------------------------------|----------------------------------------------------------------------------------------------------------------------------------------------------------------------------------------------------------------------------------------------------------------------------------------------------------------------------------------------------------------------------------------------------------------------------------------------------------------------------------------------------------------------------------------------------------------------------------------------------------------------------------------------------------------------------------|------------------|------------------------|----------------------------|------------|----------------------|--------------------------|--|------|--------------|------------------------|----------------------------|------------|----------------------|--------------------------|--------|-------|------|-------|-------|------|--------|------|-------|------|-------|--------|------|-------|-------|--------|------|--------|-------|------|--------|
| <b>Sertaconazole nitrate</b> |                                  | <table border="1"> <thead> <tr> <th colspan="7">Average Response</th> </tr> <tr> <th>Dose</th> <th>Green Signal</th> <th>Actual Pct Green Cells</th> <th>Normalized Pct Green Cells</th> <th>Red Signal</th> <th>Actual Pct Red Cells</th> <th>Normalized Pct Red Cells</th> </tr> </thead> <tbody> <tr> <td>0.1 uM</td> <td>92.16</td> <td>0.82</td> <td>34.16</td> <td>91.43</td> <td>0.09</td> <td>-17.47</td> </tr> <tr> <td>1 uM</td> <td>96.48</td> <td>0.87</td> <td>24.46</td> <td>103.71</td> <td>0.16</td> <td>14.27</td> </tr> <tr> <td>10 uM</td> <td>103.65</td> <td>0.95</td> <td>134.81</td> <td>84.11</td> <td>0.08</td> <td>-17.19</td> </tr> </tbody> </table> | Average Response |                        |                            |            |                      |                          |  | Dose | Green Signal | Actual Pct Green Cells | Normalized Pct Green Cells | Red Signal | Actual Pct Red Cells | Normalized Pct Red Cells | 0.1 uM | 92.16 | 0.82 | 34.16 | 91.43 | 0.09 | -17.47 | 1 uM | 96.48 | 0.87 | 24.46 | 103.71 | 0.16 | 14.27 | 10 uM | 103.65 | 0.95 | 134.81 | 84.11 | 0.08 | -17.19 |
|                              |                                  | Average Response                                                                                                                                                                                                                                                                                                                                                                                                                                                                                                                                                                                                                                                                 |                  |                        |                            |            |                      |                          |  |      |              |                        |                            |            |                      |                          |        |       |      |       |       |      |        |      |       |      |       |        |      |       |       |        |      |        |       |      |        |
|                              |                                  | Dose                                                                                                                                                                                                                                                                                                                                                                                                                                                                                                                                                                                                                                                                             | Green Signal     | Actual Pct Green Cells | Normalized Pct Green Cells | Red Signal | Actual Pct Red Cells | Normalized Pct Red Cells |  |      |              |                        |                            |            |                      |                          |        |       |      |       |       |      |        |      |       |      |       |        |      |       |       |        |      |        |       |      |        |
|                              |                                  | 0.1 uM                                                                                                                                                                                                                                                                                                                                                                                                                                                                                                                                                                                                                                                                           | 92.16            | 0.82                   | 34.16                      | 91.43      | 0.09                 | -17.47                   |  |      |              |                        |                            |            |                      |                          |        |       |      |       |       |      |        |      |       |      |       |        |      |       |       |        |      |        |       |      |        |
| 1 uM                         | 96.48                            | 0.87                                                                                                                                                                                                                                                                                                                                                                                                                                                                                                                                                                                                                                                                             | 24.46            | 103.71                 | 0.16                       | 14.27      |                      |                          |  |      |              |                        |                            |            |                      |                          |        |       |      |       |       |      |        |      |       |      |       |        |      |       |       |        |      |        |       |      |        |
| 10 uM                        | 103.65                           | 0.95                                                                                                                                                                                                                                                                                                                                                                                                                                                                                                                                                                                                                                                                             | 134.81           | 84.11                  | 0.08                       | -17.19     |                      |                          |  |      |              |                        |                            |            |                      |                          |        |       |      |       |       |      |        |      |       |      |       |        |      |       |       |        |      |        |       |      |        |





Compound

Normalized Values (A and B Sets)

Responses

|  |        |        |      |        |       |      |        |  |  |  |  |
|--|--------|--------|------|--------|-------|------|--------|--|--|--|--|
|  |        |        |      |        |       |      |        |  |  |  |  |
|  | 0.1 uM | 93.79  | 0.84 | 32.14  | 86.56 | 0.05 | -49.54 |  |  |  |  |
|  | 1 uM   | 103.37 | 0.86 | 96.70  | 87.63 | 0.04 | -39.81 |  |  |  |  |
|  | 10 uM  | 112.57 | 0.89 | 111.89 | 99.94 | 0.07 | -25.79 |  |  |  |  |

Compound

Normalized Values (A and B Sets)

Responses

|                  |        |              |                        |                            |                         |                      |                          |  |  |  |  |
|------------------|--------|--------------|------------------------|----------------------------|-------------------------|----------------------|--------------------------|--|--|--|--|
| <b>Silymarin</b> |        |              |                        |                            | <b>Average Response</b> |                      |                          |  |  |  |  |
|                  | Dose   | Green Signal | Actual Pct Green Cells | Normalized Pct Green Cells | Red Signal              | Actual Pct Red Cells | Normalized Pct Red Cells |  |  |  |  |
|                  | 0.1 uM | 89.52        | 0.81                   | 9.57                       | 84.06                   | 0.06                 | -27.20                   |  |  |  |  |
|                  | 1 uM   | 110.65       | 0.91                   | 109.43                     | 104.86                  | 0.11                 | -4.64                    |  |  |  |  |
| 10 uM            | 92.04  | 0.84         | 182.75                 | 93.76                      | 0.07                    | -22.57               |                          |  |  |  |  |

Compound

Normalized Values (A and B Sets)

Responses

|                 |        |              |                        |                            |                         |                      |                          |  |  |  |  |
|-----------------|--------|--------------|------------------------|----------------------------|-------------------------|----------------------|--------------------------|--|--|--|--|
| <b>Sirtinol</b> |        |              |                        |                            | <b>Average Response</b> |                      |                          |  |  |  |  |
|                 | Dose   | Green Signal | Actual Pct Green Cells | Normalized Pct Green Cells | Red Signal              | Actual Pct Red Cells | Normalized Pct Red Cells |  |  |  |  |
|                 | 0.1 uM | 102.72       | 0.92                   | 117.39                     | 99.82                   | 0.12                 | 1.80                     |  |  |  |  |
|                 | 1 uM   | 102.21       | 0.85                   | 70.57                      | 82.79                   | 0.06                 | -27.03                   |  |  |  |  |
| 10 uM           | 103.56 | 0.96         | 341.57                 | 111.36                     | 0.13                    | 2.94                 |                          |  |  |  |  |

Compound

Normalized Values (A and B Sets)

Responses

|                             |        |              |                        |                            |                         |                      |                          |  |  |  |  |
|-----------------------------|--------|--------------|------------------------|----------------------------|-------------------------|----------------------|--------------------------|--|--|--|--|
| <b>Sitafloxacin Hydrate</b> |        |              |                        |                            | <b>Average Response</b> |                      |                          |  |  |  |  |
|                             | Dose   | Green Signal | Actual Pct Green Cells | Normalized Pct Green Cells | Red Signal              | Actual Pct Red Cells | Normalized Pct Red Cells |  |  |  |  |
|                             | 0.1 uM | 87.36        | 0.88                   | 85.49                      | 90.40                   | 0.04                 | -37.21                   |  |  |  |  |
|                             | 1 uM   | 94.33        | 0.84                   | 72.00                      | 65.25                   | 0.01                 | -52.70                   |  |  |  |  |
| 10 uM                       | 96.75  | 0.89         | 297.88                 | 96.57                      | 0.07                    | -24.37               |                          |  |  |  |  |

Compound

Normalized Values (A and B Sets)

Responses

|                                          |        |              |                        |                            |                         |                      |                          |  |  |  |  |
|------------------------------------------|--------|--------------|------------------------|----------------------------|-------------------------|----------------------|--------------------------|--|--|--|--|
| <b>Sitagliptin phosphate monohydrate</b> |        |              |                        |                            | <b>Average Response</b> |                      |                          |  |  |  |  |
|                                          | Dose   | Green Signal | Actual Pct Green Cells | Normalized Pct Green Cells | Red Signal              | Actual Pct Red Cells | Normalized Pct Red Cells |  |  |  |  |
|                                          | 0.1 uM | 90.68        | 0.89                   | 123.81                     | 73.32                   | 0.02                 | -51.56                   |  |  |  |  |
|                                          | 1 uM   | 84.42        | 0.73                   | 6.63                       | 66.82                   | 0.01                 | -62.54                   |  |  |  |  |
| 10 uM                                    | 86.60  | 0.73         | -65.95                 | 82.69                      | 0.04                    | -43.51               |                          |  |  |  |  |

Compound

Normalized Values (A and B Sets)

Responses

| Compound          | Normalized Values (A and B Sets) |  | Average Response |              |                        |                            |            |                      |                          |        |
|-------------------|----------------------------------|--|------------------|--------------|------------------------|----------------------------|------------|----------------------|--------------------------|--------|
|                   |                                  |  | Dose             | Green Signal | Actual Pct Green Cells | Normalized Pct Green Cells | Red Signal | Actual Pct Red Cells | Normalized Pct Red Cells |        |
| Sitaxentan sodium |                                  |  | 0.1 uM           | 84.34        | 0.78                   | -                          | 245.20     | 84.94                | 0.09                     | -17.57 |
|                   |                                  |  | 1 uM             | 93.85        | 0.77                   | 41.20                      | 76.68      | 0.03                 | -51.39                   |        |
|                   |                                  |  | 10 uM            | 97.96        | 0.83                   | 74.34                      | 93.21      | 0.07                 | -26.84                   |        |

Compound

Normalized Values (A and B Sets)

Responses

| Compound  | Normalized Values (A and B Sets) |  | Average Response |              |                        |                            |            |                      |                          |        |
|-----------|----------------------------------|--|------------------|--------------|------------------------|----------------------------|------------|----------------------|--------------------------|--------|
|           |                                  |  | Dose             | Green Signal | Actual Pct Green Cells | Normalized Pct Green Cells | Red Signal | Actual Pct Red Cells | Normalized Pct Red Cells |        |
| SJ 172550 |                                  |  | 0.1 uM           | 103.34       | 0.89                   | 98.84                      | 72.53      | 0.01                 | -68.25                   |        |
|           |                                  |  | 1 uM             | 89.13        | 0.83                   | -                          | 319.55     | 70.98                | 0.02                     | -41.85 |
|           |                                  |  | 10 uM            | 92.49        | 0.89                   | 72.59                      | 76.72      | 0.03                 | -36.11                   |        |

Compound

Normalized Values (A and B Sets)

Responses

| Compound | Normalized Values (A and B Sets) |  | Average Response |              |                        |                            |            |                      |                          |
|----------|----------------------------------|--|------------------|--------------|------------------------|----------------------------|------------|----------------------|--------------------------|
|          |                                  |  | Dose             | Green Signal | Actual Pct Green Cells | Normalized Pct Green Cells | Red Signal | Actual Pct Red Cells | Normalized Pct Red Cells |
| SK1-I    |                                  |  | 0.1 uM           | 92.49        | 0.85                   | 69.62                      | 76.54      | 0.02                 | -62.32                   |
|          |                                  |  | 1 uM             | 94.67        | 0.87                   | 96.79                      | 87.24      | 0.06                 | -27.67                   |
|          |                                  |  | 10 uM            | 96.47        | 0.90                   | 90.08                      | 87.78      | 0.12                 | -1.17                    |

Compound

Normalized Values (A and B Sets)

Responses

| Compound    | Normalized Values (A and B Sets) |  | Average Response |              |                        |                            |            |                      |                          |        |
|-------------|----------------------------------|--|------------------|--------------|------------------------|----------------------------|------------|----------------------|--------------------------|--------|
|             |                                  |  | Dose             | Green Signal | Actual Pct Green Cells | Normalized Pct Green Cells | Red Signal | Actual Pct Red Cells | Normalized Pct Red Cells |        |
| Skepinone-L |                                  |  | 0.1 uM           | 92.04        | 0.79                   | 13.24                      | 111.39     | 0.16                 | 23.70                    |        |
|             |                                  |  | 1 uM             | 84.79        | 0.74                   | -                          | 814.36     | 81.20                | 0.05                     | -30.86 |
|             |                                  |  | 10 uM            | 94.12        | 0.88                   | 64.83                      | 72.69      | 0.04                 | -33.47                   |        |

Compound

Normalized Values (A and B Sets)

Responses

| Compound  | Normalized Values (A and B Sets) |  | Average Response |              |                        |                            |            |                      |                          |
|-----------|----------------------------------|--|------------------|--------------|------------------------|----------------------------|------------|----------------------|--------------------------|
|           |                                  |  | Dose             | Green Signal | Actual Pct Green Cells | Normalized Pct Green Cells | Red Signal | Actual Pct Red Cells | Normalized Pct Red Cells |
| SKF 91488 |                                  |  | 0.1 uM           | 103.91       | 0.92                   | 125.16                     | 84.81      | 0.04                 | -51.32                   |
|           |                                  |  | 1 uM             | 99.50        | 0.90                   | -35.73                     | 75.07      | 0.02                 | -38.78                   |





Compound

Normalized Values (A and B Sets)

Responses

|  |        |       |      |        |                                                                                                                                                                                                                                                                                                                                                                   |      |        |  |  |  |  |        |       |      |       |       |      |        |      |       |      |        |       |      |        |       |       |      |        |        |      |       |
|--|--------|-------|------|--------|-------------------------------------------------------------------------------------------------------------------------------------------------------------------------------------------------------------------------------------------------------------------------------------------------------------------------------------------------------------------|------|--------|--|--|--|--|--------|-------|------|-------|-------|------|--------|------|-------|------|--------|-------|------|--------|-------|-------|------|--------|--------|------|-------|
|  |        |       |      |        | <table border="1"> <tr> <td>0.1 uM</td><td>97.47</td><td>0.89</td><td>91.20</td><td>85.45</td><td>0.03</td><td>-55.37</td></tr> <tr> <td>1 uM</td><td>77.21</td><td>0.55</td><td>378.34</td><td>92.35</td><td>0.10</td><td>-11.88</td></tr> <tr> <td>10 uM</td><td>85.61</td><td>0.62</td><td>-70.62</td><td>106.36</td><td>0.10</td><td>-9.16</td></tr> </table> |      |        |  |  |  |  | 0.1 uM | 97.47 | 0.89 | 91.20 | 85.45 | 0.03 | -55.37 | 1 uM | 77.21 | 0.55 | 378.34 | 92.35 | 0.10 | -11.88 | 10 uM | 85.61 | 0.62 | -70.62 | 106.36 | 0.10 | -9.16 |
|  | 0.1 uM | 97.47 | 0.89 | 91.20  | 85.45                                                                                                                                                                                                                                                                                                                                                             | 0.03 | -55.37 |  |  |  |  |        |       |      |       |       |      |        |      |       |      |        |       |      |        |       |       |      |        |        |      |       |
|  | 1 uM   | 77.21 | 0.55 | 378.34 | 92.35                                                                                                                                                                                                                                                                                                                                                             | 0.10 | -11.88 |  |  |  |  |        |       |      |       |       |      |        |      |       |      |        |       |      |        |       |       |      |        |        |      |       |
|  | 10 uM  | 85.61 | 0.62 | -70.62 | 106.36                                                                                                                                                                                                                                                                                                                                                            | 0.10 | -9.16  |  |  |  |  |        |       |      |       |       |      |        |      |       |      |        |       |      |        |       |       |      |        |        |      |       |

Compound

Normalized Values (A and B Sets)

Responses

| <b>SNS-314 Mesylate</b> |                  |              |                        |                            | <table border="1"> <thead> <tr> <th colspan="7">Average Response</th> </tr> <tr> <th>Dose</th><th>Green Signal</th><th>Actual Pct Green Cells</th><th>Normalized Pct Green Cells</th><th>Red Signal</th><th>Actual Pct Red Cells</th><th>Normalized Pct Red Cells</th></tr> </thead> <tbody> <tr> <td>0.1 uM</td><td>98.30</td><td>0.88</td><td>43.45</td><td>92.10</td><td>0.06</td><td>-41.33</td></tr> <tr> <td>1 uM</td><td>106.59</td><td>0.93</td><td>150.87</td><td>86.18</td><td>0.05</td><td>-33.58</td></tr> <tr> <td>10 uM</td><td>92.37</td><td>0.78</td><td>42.91</td><td>85.39</td><td>0.02</td><td>-43.71</td></tr> </tbody> </table> |                      |                          |  |  |  |  | Average Response |  |  |  |  |  |  | Dose | Green Signal | Actual Pct Green Cells | Normalized Pct Green Cells | Red Signal | Actual Pct Red Cells | Normalized Pct Red Cells | 0.1 uM | 98.30 | 0.88 | 43.45 | 92.10 | 0.06 | -41.33 | 1 uM | 106.59 | 0.93 | 150.87 | 86.18 | 0.05 | -33.58 | 10 uM | 92.37 | 0.78 | 42.91 | 85.39 | 0.02 | -43.71 |
|-------------------------|------------------|--------------|------------------------|----------------------------|------------------------------------------------------------------------------------------------------------------------------------------------------------------------------------------------------------------------------------------------------------------------------------------------------------------------------------------------------------------------------------------------------------------------------------------------------------------------------------------------------------------------------------------------------------------------------------------------------------------------------------------------------|----------------------|--------------------------|--|--|--|--|------------------|--|--|--|--|--|--|------|--------------|------------------------|----------------------------|------------|----------------------|--------------------------|--------|-------|------|-------|-------|------|--------|------|--------|------|--------|-------|------|--------|-------|-------|------|-------|-------|------|--------|
|                         | Average Response |              |                        |                            |                                                                                                                                                                                                                                                                                                                                                                                                                                                                                                                                                                                                                                                      |                      |                          |  |  |  |  |                  |  |  |  |  |  |  |      |              |                        |                            |            |                      |                          |        |       |      |       |       |      |        |      |        |      |        |       |      |        |       |       |      |       |       |      |        |
|                         | Dose             | Green Signal | Actual Pct Green Cells | Normalized Pct Green Cells | Red Signal                                                                                                                                                                                                                                                                                                                                                                                                                                                                                                                                                                                                                                           | Actual Pct Red Cells | Normalized Pct Red Cells |  |  |  |  |                  |  |  |  |  |  |  |      |              |                        |                            |            |                      |                          |        |       |      |       |       |      |        |      |        |      |        |       |      |        |       |       |      |       |       |      |        |
|                         | 0.1 uM           | 98.30        | 0.88                   | 43.45                      | 92.10                                                                                                                                                                                                                                                                                                                                                                                                                                                                                                                                                                                                                                                | 0.06                 | -41.33                   |  |  |  |  |                  |  |  |  |  |  |  |      |              |                        |                            |            |                      |                          |        |       |      |       |       |      |        |      |        |      |        |       |      |        |       |       |      |       |       |      |        |
| 1 uM                    | 106.59           | 0.93         | 150.87                 | 86.18                      | 0.05                                                                                                                                                                                                                                                                                                                                                                                                                                                                                                                                                                                                                                                 | -33.58               |                          |  |  |  |  |                  |  |  |  |  |  |  |      |              |                        |                            |            |                      |                          |        |       |      |       |       |      |        |      |        |      |        |       |      |        |       |       |      |       |       |      |        |
| 10 uM                   | 92.37            | 0.78         | 42.91                  | 85.39                      | 0.02                                                                                                                                                                                                                                                                                                                                                                                                                                                                                                                                                                                                                                                 | -43.71               |                          |  |  |  |  |                  |  |  |  |  |  |  |      |              |                        |                            |            |                      |                          |        |       |      |       |       |      |        |      |        |      |        |       |      |        |       |       |      |       |       |      |        |

Compound

Normalized Values (A and B Sets)

Responses

| <b>SNX-2112 (PF-04928473)</b> |                  |              |                        |                            | <table border="1"> <thead> <tr> <th colspan="7">Average Response</th> </tr> <tr> <th>Dose</th><th>Green Signal</th><th>Actual Pct Green Cells</th><th>Normalized Pct Green Cells</th><th>Red Signal</th><th>Actual Pct Red Cells</th><th>Normalized Pct Red Cells</th></tr> </thead> <tbody> <tr> <td>0.1 uM</td><td>82.25</td><td>0.68</td><td>121.82</td><td>91.59</td><td>0.11</td><td>-5.27</td></tr> <tr> <td>1 uM</td><td>105.75</td><td>0.84</td><td>60.00</td><td>94.17</td><td>0.13</td><td>0.05</td></tr> <tr> <td>10 uM</td><td>108.00</td><td>0.86</td><td>287.97</td><td>76.92</td><td>0.06</td><td>-28.49</td></tr> </tbody> </table> |                      |                          |  |  |  |  | Average Response |  |  |  |  |  |  | Dose | Green Signal | Actual Pct Green Cells | Normalized Pct Green Cells | Red Signal | Actual Pct Red Cells | Normalized Pct Red Cells | 0.1 uM | 82.25 | 0.68 | 121.82 | 91.59 | 0.11 | -5.27 | 1 uM | 105.75 | 0.84 | 60.00 | 94.17 | 0.13 | 0.05 | 10 uM | 108.00 | 0.86 | 287.97 | 76.92 | 0.06 | -28.49 |
|-------------------------------|------------------|--------------|------------------------|----------------------------|-----------------------------------------------------------------------------------------------------------------------------------------------------------------------------------------------------------------------------------------------------------------------------------------------------------------------------------------------------------------------------------------------------------------------------------------------------------------------------------------------------------------------------------------------------------------------------------------------------------------------------------------------------|----------------------|--------------------------|--|--|--|--|------------------|--|--|--|--|--|--|------|--------------|------------------------|----------------------------|------------|----------------------|--------------------------|--------|-------|------|--------|-------|------|-------|------|--------|------|-------|-------|------|------|-------|--------|------|--------|-------|------|--------|
|                               | Average Response |              |                        |                            |                                                                                                                                                                                                                                                                                                                                                                                                                                                                                                                                                                                                                                                     |                      |                          |  |  |  |  |                  |  |  |  |  |  |  |      |              |                        |                            |            |                      |                          |        |       |      |        |       |      |       |      |        |      |       |       |      |      |       |        |      |        |       |      |        |
|                               | Dose             | Green Signal | Actual Pct Green Cells | Normalized Pct Green Cells | Red Signal                                                                                                                                                                                                                                                                                                                                                                                                                                                                                                                                                                                                                                          | Actual Pct Red Cells | Normalized Pct Red Cells |  |  |  |  |                  |  |  |  |  |  |  |      |              |                        |                            |            |                      |                          |        |       |      |        |       |      |       |      |        |      |       |       |      |      |       |        |      |        |       |      |        |
|                               | 0.1 uM           | 82.25        | 0.68                   | 121.82                     | 91.59                                                                                                                                                                                                                                                                                                                                                                                                                                                                                                                                                                                                                                               | 0.11                 | -5.27                    |  |  |  |  |                  |  |  |  |  |  |  |      |              |                        |                            |            |                      |                          |        |       |      |        |       |      |       |      |        |      |       |       |      |      |       |        |      |        |       |      |        |
| 1 uM                          | 105.75           | 0.84         | 60.00                  | 94.17                      | 0.13                                                                                                                                                                                                                                                                                                                                                                                                                                                                                                                                                                                                                                                | 0.05                 |                          |  |  |  |  |                  |  |  |  |  |  |  |      |              |                        |                            |            |                      |                          |        |       |      |        |       |      |       |      |        |      |       |       |      |      |       |        |      |        |       |      |        |
| 10 uM                         | 108.00           | 0.86         | 287.97                 | 76.92                      | 0.06                                                                                                                                                                                                                                                                                                                                                                                                                                                                                                                                                                                                                                                | -28.49               |                          |  |  |  |  |                  |  |  |  |  |  |  |      |              |                        |                            |            |                      |                          |        |       |      |        |       |      |       |      |        |      |       |       |      |      |       |        |      |        |       |      |        |

Compound

Normalized Values (A and B Sets)

Responses

| <b>Sodium 4-aminohippurate Hydrate</b> |                  |              |                        |                            | <table border="1"> <thead> <tr> <th colspan="7">Average Response</th> </tr> <tr> <th>Dose</th><th>Green Signal</th><th>Actual Pct Green Cells</th><th>Normalized Pct Green Cells</th><th>Red Signal</th><th>Actual Pct Red Cells</th><th>Normalized Pct Red Cells</th></tr> </thead> <tbody> <tr> <td>0.1 uM</td><td>102.44</td><td>0.93</td><td>221.08</td><td>87.25</td><td>0.06</td><td>-35.41</td></tr> <tr> <td>1 uM</td><td>104.31</td><td>0.87</td><td>103.85</td><td>98.76</td><td>0.11</td><td>-11.50</td></tr> <tr> <td>10 uM</td><td>91.42</td><td>0.76</td><td>19.20</td><td>117.52</td><td>0.18</td><td>30.37</td></tr> </tbody> </table> |                      |                          |  |  |  |  | Average Response |  |  |  |  |  |  | Dose | Green Signal | Actual Pct Green Cells | Normalized Pct Green Cells | Red Signal | Actual Pct Red Cells | Normalized Pct Red Cells | 0.1 uM | 102.44 | 0.93 | 221.08 | 87.25 | 0.06 | -35.41 | 1 uM | 104.31 | 0.87 | 103.85 | 98.76 | 0.11 | -11.50 | 10 uM | 91.42 | 0.76 | 19.20 | 117.52 | 0.18 | 30.37 |
|----------------------------------------|------------------|--------------|------------------------|----------------------------|--------------------------------------------------------------------------------------------------------------------------------------------------------------------------------------------------------------------------------------------------------------------------------------------------------------------------------------------------------------------------------------------------------------------------------------------------------------------------------------------------------------------------------------------------------------------------------------------------------------------------------------------------------|----------------------|--------------------------|--|--|--|--|------------------|--|--|--|--|--|--|------|--------------|------------------------|----------------------------|------------|----------------------|--------------------------|--------|--------|------|--------|-------|------|--------|------|--------|------|--------|-------|------|--------|-------|-------|------|-------|--------|------|-------|
|                                        | Average Response |              |                        |                            |                                                                                                                                                                                                                                                                                                                                                                                                                                                                                                                                                                                                                                                        |                      |                          |  |  |  |  |                  |  |  |  |  |  |  |      |              |                        |                            |            |                      |                          |        |        |      |        |       |      |        |      |        |      |        |       |      |        |       |       |      |       |        |      |       |
|                                        | Dose             | Green Signal | Actual Pct Green Cells | Normalized Pct Green Cells | Red Signal                                                                                                                                                                                                                                                                                                                                                                                                                                                                                                                                                                                                                                             | Actual Pct Red Cells | Normalized Pct Red Cells |  |  |  |  |                  |  |  |  |  |  |  |      |              |                        |                            |            |                      |                          |        |        |      |        |       |      |        |      |        |      |        |       |      |        |       |       |      |       |        |      |       |
|                                        | 0.1 uM           | 102.44       | 0.93                   | 221.08                     | 87.25                                                                                                                                                                                                                                                                                                                                                                                                                                                                                                                                                                                                                                                  | 0.06                 | -35.41                   |  |  |  |  |                  |  |  |  |  |  |  |      |              |                        |                            |            |                      |                          |        |        |      |        |       |      |        |      |        |      |        |       |      |        |       |       |      |       |        |      |       |
| 1 uM                                   | 104.31           | 0.87         | 103.85                 | 98.76                      | 0.11                                                                                                                                                                                                                                                                                                                                                                                                                                                                                                                                                                                                                                                   | -11.50               |                          |  |  |  |  |                  |  |  |  |  |  |  |      |              |                        |                            |            |                      |                          |        |        |      |        |       |      |        |      |        |      |        |       |      |        |       |       |      |       |        |      |       |
| 10 uM                                  | 91.42            | 0.76         | 19.20                  | 117.52                     | 0.18                                                                                                                                                                                                                                                                                                                                                                                                                                                                                                                                                                                                                                                   | 30.37                |                          |  |  |  |  |                  |  |  |  |  |  |  |      |              |                        |                            |            |                      |                          |        |        |      |        |       |      |        |      |        |      |        |       |      |        |       |       |      |       |        |      |       |

Compound

Normalized Values (A and B Sets)

Responses

| <b>Sodium ascorbate</b> |                  |              |                        |                            | <table border="1"> <thead> <tr> <th colspan="7">Average Response</th> </tr> <tr> <th>Dose</th><th>Green Signal</th><th>Actual Pct Green Cells</th><th>Normalized Pct Green Cells</th><th>Red Signal</th><th>Actual Pct Red Cells</th><th>Normalized Pct Red Cells</th></tr> </thead> <tbody> <tr> <td>0.1 uM</td><td>111.18</td><td>0.96</td><td>222.77</td><td>92.71</td><td>0.09</td><td>-18.31</td></tr> <tr> <td>1 uM</td><td>88.40</td><td>0.74</td><td>6.18</td><td>93.48</td><td>0.08</td><td>-26.08</td></tr> <tr> <td>10 uM</td><td>110.00</td><td>0.91</td><td>150.04</td><td>109.45</td><td>0.16</td><td>20.96</td></tr> </tbody> </table> |                      |                          |  |  |  |  | Average Response |  |  |  |  |  |  | Dose | Green Signal | Actual Pct Green Cells | Normalized Pct Green Cells | Red Signal | Actual Pct Red Cells | Normalized Pct Red Cells | 0.1 uM | 111.18 | 0.96 | 222.77 | 92.71 | 0.09 | -18.31 | 1 uM | 88.40 | 0.74 | 6.18 | 93.48 | 0.08 | -26.08 | 10 uM | 110.00 | 0.91 | 150.04 | 109.45 | 0.16 | 20.96 |
|-------------------------|------------------|--------------|------------------------|----------------------------|-------------------------------------------------------------------------------------------------------------------------------------------------------------------------------------------------------------------------------------------------------------------------------------------------------------------------------------------------------------------------------------------------------------------------------------------------------------------------------------------------------------------------------------------------------------------------------------------------------------------------------------------------------|----------------------|--------------------------|--|--|--|--|------------------|--|--|--|--|--|--|------|--------------|------------------------|----------------------------|------------|----------------------|--------------------------|--------|--------|------|--------|-------|------|--------|------|-------|------|------|-------|------|--------|-------|--------|------|--------|--------|------|-------|
|                         | Average Response |              |                        |                            |                                                                                                                                                                                                                                                                                                                                                                                                                                                                                                                                                                                                                                                       |                      |                          |  |  |  |  |                  |  |  |  |  |  |  |      |              |                        |                            |            |                      |                          |        |        |      |        |       |      |        |      |       |      |      |       |      |        |       |        |      |        |        |      |       |
|                         | Dose             | Green Signal | Actual Pct Green Cells | Normalized Pct Green Cells | Red Signal                                                                                                                                                                                                                                                                                                                                                                                                                                                                                                                                                                                                                                            | Actual Pct Red Cells | Normalized Pct Red Cells |  |  |  |  |                  |  |  |  |  |  |  |      |              |                        |                            |            |                      |                          |        |        |      |        |       |      |        |      |       |      |      |       |      |        |       |        |      |        |        |      |       |
|                         | 0.1 uM           | 111.18       | 0.96                   | 222.77                     | 92.71                                                                                                                                                                                                                                                                                                                                                                                                                                                                                                                                                                                                                                                 | 0.09                 | -18.31                   |  |  |  |  |                  |  |  |  |  |  |  |      |              |                        |                            |            |                      |                          |        |        |      |        |       |      |        |      |       |      |      |       |      |        |       |        |      |        |        |      |       |
| 1 uM                    | 88.40            | 0.74         | 6.18                   | 93.48                      | 0.08                                                                                                                                                                                                                                                                                                                                                                                                                                                                                                                                                                                                                                                  | -26.08               |                          |  |  |  |  |                  |  |  |  |  |  |  |      |              |                        |                            |            |                      |                          |        |        |      |        |       |      |        |      |       |      |      |       |      |        |       |        |      |        |        |      |       |
| 10 uM                   | 110.00           | 0.91         | 150.04                 | 109.45                     | 0.16                                                                                                                                                                                                                                                                                                                                                                                                                                                                                                                                                                                                                                                  | 20.96                |                          |  |  |  |  |                  |  |  |  |  |  |  |      |              |                        |                            |            |                      |                          |        |        |      |        |       |      |        |      |       |      |      |       |      |        |       |        |      |        |        |      |       |

Compound

Normalized Values (A and B Sets)

Responses

| Sodium Danshensu | Percent Green Cells (AB) |  | Percent Red Cells (AB) |       | Average Response |              |                        |                            |            |                      |                          |
|------------------|--------------------------|--|------------------------|-------|------------------|--------------|------------------------|----------------------------|------------|----------------------|--------------------------|
|                  | Percent Response         |  | Percent Response       |       | Dose             | Green Signal | Actual Pct Green Cells | Normalized Pct Green Cells | Red Signal | Actual Pct Red Cells | Normalized Pct Red Cells |
|                  |                          |  |                        |       | 0.1 uM           | 88.61        | 0.84                   | 42.40                      | 76.17      | 0.03                 | -41.57                   |
|                  | concentration            |  | concentration          |       | 1 uM             | 86.76        | 0.71                   | 9.66                       | 85.62      | 0.05                 | -34.96                   |
|                  |                          |  |                        | 10 uM | 87.66            | 0.84         | -40.43                 | 96.44                      | 0.08       | -21.22               |                          |

Compound

Normalized Values (A and B Sets)

Responses

| Sodium Nitrite | Percent Green Cells (AB) |  | Percent Red Cells (AB) |       | Average Response |              |                        |                            |            |                      |                          |
|----------------|--------------------------|--|------------------------|-------|------------------|--------------|------------------------|----------------------------|------------|----------------------|--------------------------|
|                | Percent Response         |  | Percent Response       |       | Dose             | Green Signal | Actual Pct Green Cells | Normalized Pct Green Cells | Red Signal | Actual Pct Red Cells | Normalized Pct Red Cells |
|                |                          |  |                        |       | 0.1 uM           | 95.42        | 0.86                   | 86.11                      | 70.85      | 0.03                 | -46.11                   |
|                | concentration            |  | concentration          |       | 1 uM             | 82.09        | 0.68                   | -33.34                     | 79.37      | 0.03                 | -50.31                   |
|                |                          |  |                        | 10 uM | 108.21           | 0.92         | 148.16                 | 99.45                      | 0.11       | -7.63                |                          |

Compound

Normalized Values (A and B Sets)

Responses

| Sodium Nitroprusside | Percent Green Cells (AB) |  | Percent Red Cells (AB) |       | Average Response |              |                        |                            |            |                      |                          |
|----------------------|--------------------------|--|------------------------|-------|------------------|--------------|------------------------|----------------------------|------------|----------------------|--------------------------|
|                      | Percent Response         |  | Percent Response       |       | Dose             | Green Signal | Actual Pct Green Cells | Normalized Pct Green Cells | Red Signal | Actual Pct Red Cells | Normalized Pct Red Cells |
|                      |                          |  |                        |       | 0.1 uM           | 86.22        | 0.81                   | -84.25                     | 85.56      | 0.06                 | -30.01                   |
|                      | concentration            |  | concentration          |       | 1 uM             | 86.73        | 0.70                   | -11.29                     | 77.66      | 0.04                 | -47.76                   |
|                      |                          |  |                        | 10 uM | 92.03            | 0.78         | 43.76                  | 83.13                      | 0.04       | -43.52               |                          |

Compound

Normalized Values (A and B Sets)

Responses

| Sodium Phenylbutyrate | Percent Green Cells (AB) |  | Percent Red Cells (AB) |       | Average Response |              |                        |                            |            |                      |                          |
|-----------------------|--------------------------|--|------------------------|-------|------------------|--------------|------------------------|----------------------------|------------|----------------------|--------------------------|
|                       | Percent Response         |  | Percent Response       |       | Dose             | Green Signal | Actual Pct Green Cells | Normalized Pct Green Cells | Red Signal | Actual Pct Red Cells | Normalized Pct Red Cells |
|                       |                          |  |                        |       | 0.1 uM           | 102.06       | 0.94                   | 157.88                     | 76.66      | 0.03                 | -48.33                   |
|                       | concentration            |  | concentration          |       | 1 uM             | 87.58        | 0.74                   | 11.54                      | 93.45      | 0.08                 | -23.54                   |
|                       |                          |  |                        | 10 uM | 109.07           | 0.89         | 159.12                 | 88.82                      | 0.06       | -31.11               |                          |

Compound

Normalized Values (A and B Sets)

Responses

| Sodium Picosulfate | Percent Green Cells (AB) |  | Percent Red Cells (AB) |       | Average Response |              |                        |                            |            |                      |                          |
|--------------------|--------------------------|--|------------------------|-------|------------------|--------------|------------------------|----------------------------|------------|----------------------|--------------------------|
|                    | Percent Response         |  | Percent Response       |       | Dose             | Green Signal | Actual Pct Green Cells | Normalized Pct Green Cells | Red Signal | Actual Pct Red Cells | Normalized Pct Red Cells |
|                    |                          |  |                        |       | 0.1 uM           | 89.01        | 0.82                   | 250.26                     | 78.75      | 0.04                 | -44.94                   |
|                    | concentration            |  | concentration          |       | 1 uM             | 85.34        | 0.74                   | 12.18                      | 76.64      | 0.02                 | -56.27                   |
|                    |                          |  |                        | 10 uM | 92.92            | 0.83         | 76.52                  | 83.33                      | 0.06       | -30.87               |                          |

Compound

Normalized Values (A and B Sets)

Responses

| Sodium salicylate |       |      | Average Response |              |                        |                            |            |                      |                          |
|-------------------|-------|------|------------------|--------------|------------------------|----------------------------|------------|----------------------|--------------------------|
|                   |       |      | Dose             | Green Signal | Actual Pct Green Cells | Normalized Pct Green Cells | Red Signal | Actual Pct Red Cells | Normalized Pct Red Cells |
|                   |       |      | 0.1 uM           | 92.11        | 0.83                   | 50.09                      | 82.38      | 0.03                 | -53.92                   |
|                   |       |      | 1 uM             | 76.71        | 0.59                   | 1867.36                    | 90.83      | 0.09                 | 3.84                     |
| 10 uM             | 88.95 | 0.84 | 24.17            | 98.99        | 0.11                   | -2.38                      |            |                      |                          |

Compound

Normalized Values (A and B Sets)

Responses

| Solifenacin succinate |       |      | Average Response |              |                        |                            |            |                      |                          |
|-----------------------|-------|------|------------------|--------------|------------------------|----------------------------|------------|----------------------|--------------------------|
|                       |       |      | Dose             | Green Signal | Actual Pct Green Cells | Normalized Pct Green Cells | Red Signal | Actual Pct Red Cells | Normalized Pct Red Cells |
|                       |       |      | 0.1 uM           | 99.79        | 0.90                   | 177.11                     | 84.39      | 0.06                 | -33.02                   |
|                       |       |      | 1 uM             | 90.50        | 0.75                   | 23.16                      | 87.82      | 0.08                 | -30.19                   |
| 10 uM                 | 96.50 | 0.87 | 109.54           | 92.85        | 0.04                   | -40.35                     |            |                      |                          |

Compound

Normalized Values (A and B Sets)

Responses

| Sophocarpine |        |      | Average Response |              |                        |                            |            |                      |                          |
|--------------|--------|------|------------------|--------------|------------------------|----------------------------|------------|----------------------|--------------------------|
|              |        |      | Dose             | Green Signal | Actual Pct Green Cells | Normalized Pct Green Cells | Red Signal | Actual Pct Red Cells | Normalized Pct Red Cells |
|              |        |      | 0.1 uM           | 99.24        | 0.92                   | 125.60                     | 109.69     | 0.16                 | 21.44                    |
|              |        |      | 1 uM             | 107.31       | 0.90                   | 104.99                     | 90.73      | 0.08                 | -20.78                   |
| 10 uM        | 116.04 | 0.96 | 516.07           | 110.12       | 0.14                   | 8.35                       |            |                      |                          |

Compound

Normalized Values (A and B Sets)

Responses

| Sorafenib Tosylate |        |      | Average Response |              |                        |                            |            |                      |                          |
|--------------------|--------|------|------------------|--------------|------------------------|----------------------------|------------|----------------------|--------------------------|
|                    |        |      | Dose             | Green Signal | Actual Pct Green Cells | Normalized Pct Green Cells | Red Signal | Actual Pct Red Cells | Normalized Pct Red Cells |
|                    |        |      | 0.1 uM           | 86.92        | 0.78                   | 15.51                      | 104.79     | 0.08                 | -33.62                   |
|                    |        |      | 1 uM             | 74.28        | 0.60                   | 117.27                     | 74.56      | 0.02                 | -48.74                   |
| 10 uM              | 106.53 | 0.86 | 89.92            | 131.00       | 0.17                   | 17.82                      |            |                      |                          |

Compound

Normalized Values (A and B Sets)

Responses

| Sotrastaurin |  |  | Average Response |              |                        |                            |            |                      |                          |
|--------------|--|--|------------------|--------------|------------------------|----------------------------|------------|----------------------|--------------------------|
|              |  |  | Dose             | Green Signal | Actual Pct Green Cells | Normalized Pct Green Cells | Red Signal | Actual Pct Red Cells | Normalized Pct Red Cells |
|              |  |  | 0.1 uM           | 92.82        | 0.84                   | 46.06                      | 106.02     | 0.16                 | 23.29                    |
|              |  |  | 1 uM             | 91.05        | 0.79                   | 45.81                      | 97.16      | 0.11                 | -5.21                    |

| Compound               | Normalized Values (A and B Sets) | Responses                                              |              |                        |                            |            |                      |                          |
|------------------------|----------------------------------|--------------------------------------------------------|--------------|------------------------|----------------------------|------------|----------------------|--------------------------|
|                        |                                  | 10 uM   107.59   0.94   266.63   116.29   0.20   35.99 |              |                        |                            |            |                      |                          |
| Compound               | Normalized Values (A and B Sets) | Responses                                              |              |                        |                            |            |                      |                          |
| <b>Spiramycin</b>      |                                  | Average Response                                       |              |                        |                            |            |                      |                          |
|                        |                                  | Dose                                                   | Green Signal | Actual Pct Green Cells | Normalized Pct Green Cells | Red Signal | Actual Pct Red Cells | Normalized Pct Red Cells |
|                        |                                  | 0.1 uM                                                 | 74.94        | 0.64                   | 380.67                     | 73.04      | 0.05                 | -35.34                   |
|                        |                                  | 1 uM                                                   | 98.41        | 0.87                   | 110.69                     | 86.87      | 0.07                 | -34.16                   |
| 10 uM                  | 86.32                            | 0.79                                                   | 70.97        | 88.39                  | 0.06                       | -31.81     |                      |                          |
| Compound               | Normalized Values (A and B Sets) | Responses                                              |              |                        |                            |            |                      |                          |
| <b>Src I1</b>          |                                  | Average Response                                       |              |                        |                            |            |                      |                          |
|                        |                                  | Dose                                                   | Green Signal | Actual Pct Green Cells | Normalized Pct Green Cells | Red Signal | Actual Pct Red Cells | Normalized Pct Red Cells |
|                        |                                  | 0.1 uM                                                 | 85.62        | 0.78                   | -4.86                      | 94.89      | 0.08                 | -25.21                   |
|                        |                                  | 1 uM                                                   | 102.08       | 0.91                   | 151.64                     | 67.97      | 0.01                 | -41.71                   |
| 10 uM                  | 88.39                            | 0.83                                                   | 16.91        | 67.68                  | 0.02                       | -43.85     |                      |                          |
| Compound               | Normalized Values (A and B Sets) | Responses                                              |              |                        |                            |            |                      |                          |
| <b>SRT1720</b>         |                                  | Average Response                                       |              |                        |                            |            |                      |                          |
|                        |                                  | Dose                                                   | Green Signal | Actual Pct Green Cells | Normalized Pct Green Cells | Red Signal | Actual Pct Red Cells | Normalized Pct Red Cells |
|                        |                                  | 0.1 uM                                                 | 103.27       | 0.91                   | 100.43                     | 100.31     | 0.07                 | -37.08                   |
|                        |                                  | 1 uM                                                   | 89.81        | 0.82                   | 28.61                      | 86.01      | 0.03                 | -44.51                   |
| 10 uM                  | 85.07                            | 0.84                                                   | 77.09        | 95.27                  | 0.00                       | -52.84     |                      |                          |
| Compound               | Normalized Values (A and B Sets) | Responses                                              |              |                        |                            |            |                      |                          |
| <b>SSR128129E</b>      |                                  | Average Response                                       |              |                        |                            |            |                      |                          |
|                        |                                  | Dose                                                   | Green Signal | Actual Pct Green Cells | Normalized Pct Green Cells | Red Signal | Actual Pct Red Cells | Normalized Pct Red Cells |
|                        |                                  | 0.1 uM                                                 | 109.33       | 0.92                   | 239.01                     | 75.59      | 0.04                 | -44.13                   |
|                        |                                  | 1 uM                                                   | 106.86       | 0.87                   | 111.62                     | 86.78      | 0.05                 | -39.33                   |
| 10 uM                  | 76.38                            | 0.58                                                   | -70.39       | 77.83                  | 0.03                       | -48.22     |                      |                          |
| Compound               | Normalized Values (A and B Sets) | Responses                                              |              |                        |                            |            |                      |                          |
| <b>STAT5 Inhibitor</b> |                                  | Average Response                                       |              |                        |                            |            |                      |                          |
|                        |                                  | Dose                                                   | Green Signal | Actual Pct Green Cells | Normalized Pct Green Cells | Red Signal | Actual Pct Red Cells | Normalized Pct Red Cells |

Compound

Normalized Values (A and B Sets)

Responses

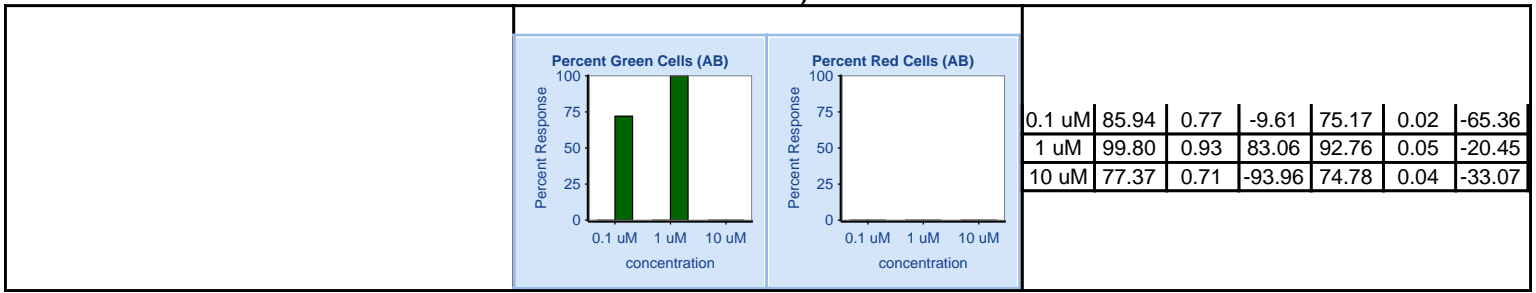

Compound

Normalized Values (A and B Sets)

Responses

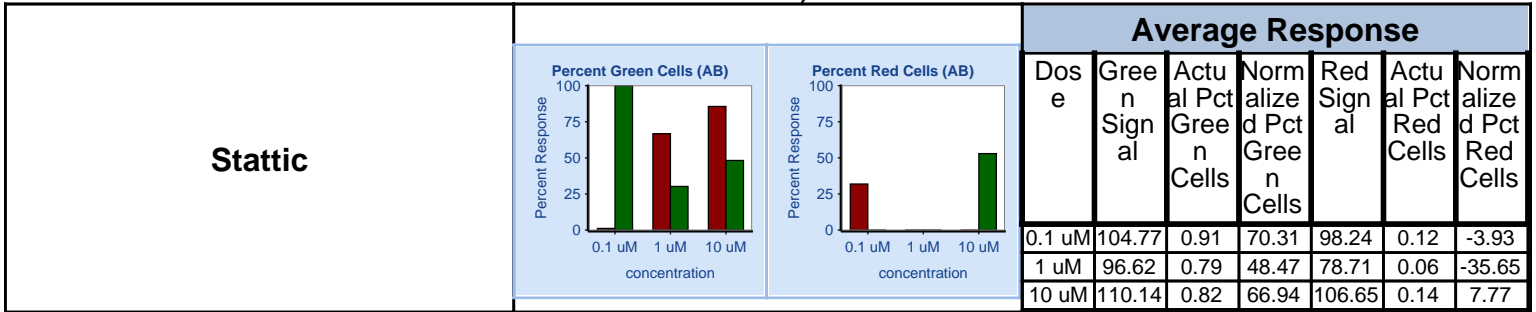

Compound

Normalized Values (A and B Sets)

Responses

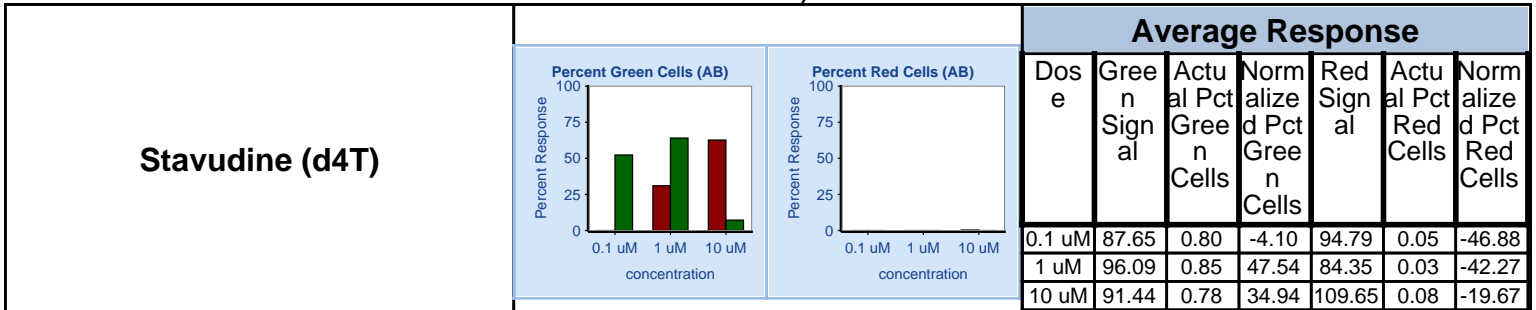

Compound

Normalized Values (A and B Sets)

Responses

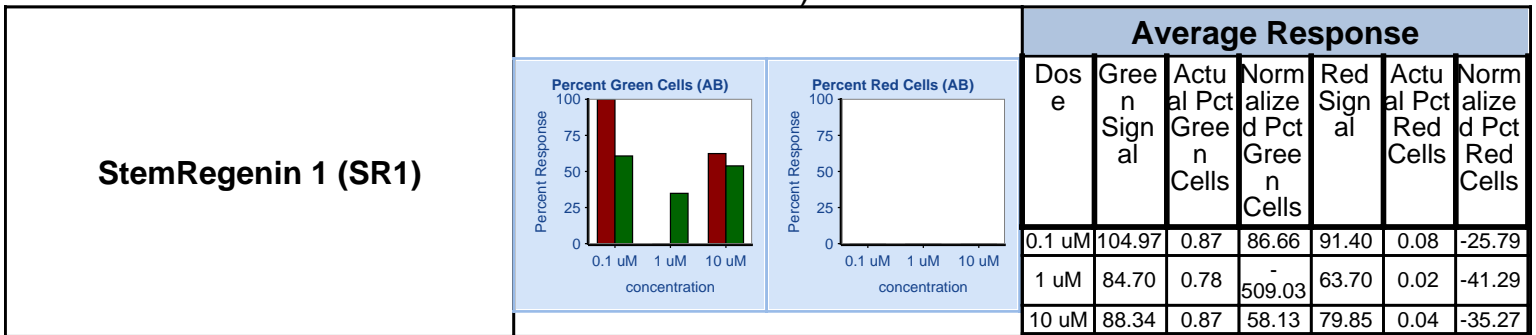

Compound

Normalized Values (A and B Sets)

Responses

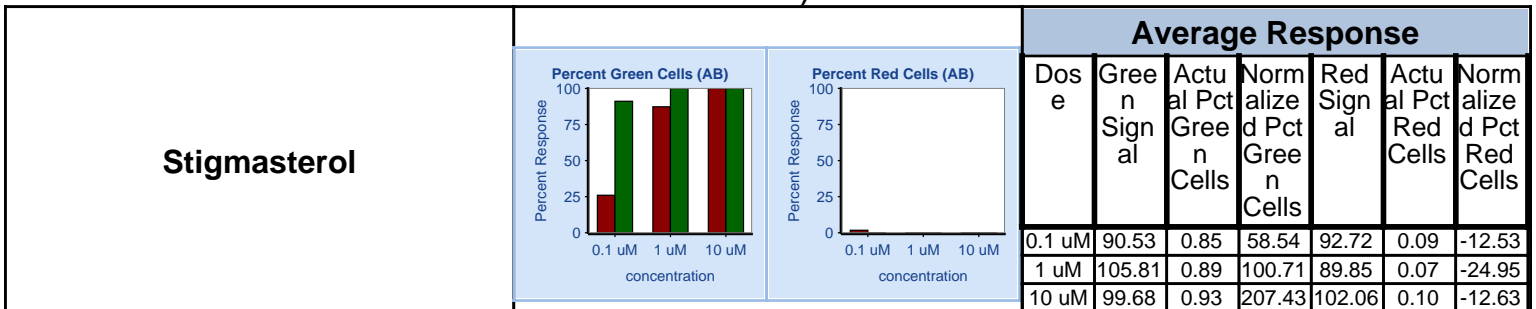

| Compound                    | Normalized Values (A and B Sets) | Responses                                                                                                                                                                                                                                                                                                                                                                                                                                                                                                                                                                                                                                                                        |                  |                        |                            |            |                      |                          |  |      |              |                        |                            |            |                      |                          |        |       |      |       |       |      |        |      |       |      |        |       |      |        |       |       |      |        |       |      |        |
|-----------------------------|----------------------------------|----------------------------------------------------------------------------------------------------------------------------------------------------------------------------------------------------------------------------------------------------------------------------------------------------------------------------------------------------------------------------------------------------------------------------------------------------------------------------------------------------------------------------------------------------------------------------------------------------------------------------------------------------------------------------------|------------------|------------------------|----------------------------|------------|----------------------|--------------------------|--|------|--------------|------------------------|----------------------------|------------|----------------------|--------------------------|--------|-------|------|-------|-------|------|--------|------|-------|------|--------|-------|------|--------|-------|-------|------|--------|-------|------|--------|
| <b>Streptomycin sulfate</b> |                                  | <table border="1"> <thead> <tr> <th colspan="7">Average Response</th> </tr> <tr> <th>Dose</th> <th>Green Signal</th> <th>Actual Pct Green Cells</th> <th>Normalized Pct Green Cells</th> <th>Red Signal</th> <th>Actual Pct Red Cells</th> <th>Normalized Pct Red Cells</th> </tr> </thead> <tbody> <tr> <td>0.1 uM</td> <td>91.83</td> <td>0.83</td> <td>22.89</td> <td>90.14</td> <td>0.06</td> <td>-26.76</td> </tr> <tr> <td>1 uM</td> <td>81.47</td> <td>0.64</td> <td>-54.90</td> <td>78.04</td> <td>0.02</td> <td>-45.40</td> </tr> <tr> <td>10 uM</td> <td>99.42</td> <td>0.89</td> <td>101.36</td> <td>80.80</td> <td>0.03</td> <td>-42.03</td> </tr> </tbody> </table> | Average Response |                        |                            |            |                      |                          |  | Dose | Green Signal | Actual Pct Green Cells | Normalized Pct Green Cells | Red Signal | Actual Pct Red Cells | Normalized Pct Red Cells | 0.1 uM | 91.83 | 0.83 | 22.89 | 90.14 | 0.06 | -26.76 | 1 uM | 81.47 | 0.64 | -54.90 | 78.04 | 0.02 | -45.40 | 10 uM | 99.42 | 0.89 | 101.36 | 80.80 | 0.03 | -42.03 |
|                             |                                  | Average Response                                                                                                                                                                                                                                                                                                                                                                                                                                                                                                                                                                                                                                                                 |                  |                        |                            |            |                      |                          |  |      |              |                        |                            |            |                      |                          |        |       |      |       |       |      |        |      |       |      |        |       |      |        |       |       |      |        |       |      |        |
|                             |                                  | Dose                                                                                                                                                                                                                                                                                                                                                                                                                                                                                                                                                                                                                                                                             | Green Signal     | Actual Pct Green Cells | Normalized Pct Green Cells | Red Signal | Actual Pct Red Cells | Normalized Pct Red Cells |  |      |              |                        |                            |            |                      |                          |        |       |      |       |       |      |        |      |       |      |        |       |      |        |       |       |      |        |       |      |        |
|                             |                                  | 0.1 uM                                                                                                                                                                                                                                                                                                                                                                                                                                                                                                                                                                                                                                                                           | 91.83            | 0.83                   | 22.89                      | 90.14      | 0.06                 | -26.76                   |  |      |              |                        |                            |            |                      |                          |        |       |      |       |       |      |        |      |       |      |        |       |      |        |       |       |      |        |       |      |        |
| 1 uM                        | 81.47                            | 0.64                                                                                                                                                                                                                                                                                                                                                                                                                                                                                                                                                                                                                                                                             | -54.90           | 78.04                  | 0.02                       | -45.40     |                      |                          |  |      |              |                        |                            |            |                      |                          |        |       |      |       |       |      |        |      |       |      |        |       |      |        |       |       |      |        |       |      |        |
| 10 uM                       | 99.42                            | 0.89                                                                                                                                                                                                                                                                                                                                                                                                                                                                                                                                                                                                                                                                             | 101.36           | 80.80                  | 0.03                       | -42.03     |                      |                          |  |      |              |                        |                            |            |                      |                          |        |       |      |       |       |      |        |      |       |      |        |       |      |        |       |       |      |        |       |      |        |

| Compound                                  | Normalized Values (A and B Sets) | Responses                                                                                                                                                                                                                                                                                                                                                                                                                                                                                                                                                                                                                                                                          |                  |                        |                            |            |                      |                          |  |      |              |                        |                            |            |                      |                          |        |        |      |        |       |      |        |      |       |      |       |        |      |       |       |        |      |        |        |      |       |
|-------------------------------------------|----------------------------------|------------------------------------------------------------------------------------------------------------------------------------------------------------------------------------------------------------------------------------------------------------------------------------------------------------------------------------------------------------------------------------------------------------------------------------------------------------------------------------------------------------------------------------------------------------------------------------------------------------------------------------------------------------------------------------|------------------|------------------------|----------------------------|------------|----------------------|--------------------------|--|------|--------------|------------------------|----------------------------|------------|----------------------|--------------------------|--------|--------|------|--------|-------|------|--------|------|-------|------|-------|--------|------|-------|-------|--------|------|--------|--------|------|-------|
| <b>Succinylcholine Chloride Dihydrate</b> |                                  | <table border="1"> <thead> <tr> <th colspan="7">Average Response</th> </tr> <tr> <th>Dose</th> <th>Green Signal</th> <th>Actual Pct Green Cells</th> <th>Normalized Pct Green Cells</th> <th>Red Signal</th> <th>Actual Pct Red Cells</th> <th>Normalized Pct Red Cells</th> </tr> </thead> <tbody> <tr> <td>0.1 uM</td> <td>115.56</td> <td>0.96</td> <td>282.14</td> <td>75.35</td> <td>0.06</td> <td>-30.42</td> </tr> <tr> <td>1 uM</td> <td>96.76</td> <td>0.79</td> <td>47.99</td> <td>110.67</td> <td>0.17</td> <td>23.07</td> </tr> <tr> <td>10 uM</td> <td>105.43</td> <td>0.90</td> <td>142.00</td> <td>116.49</td> <td>0.18</td> <td>32.22</td> </tr> </tbody> </table> | Average Response |                        |                            |            |                      |                          |  | Dose | Green Signal | Actual Pct Green Cells | Normalized Pct Green Cells | Red Signal | Actual Pct Red Cells | Normalized Pct Red Cells | 0.1 uM | 115.56 | 0.96 | 282.14 | 75.35 | 0.06 | -30.42 | 1 uM | 96.76 | 0.79 | 47.99 | 110.67 | 0.17 | 23.07 | 10 uM | 105.43 | 0.90 | 142.00 | 116.49 | 0.18 | 32.22 |
|                                           |                                  | Average Response                                                                                                                                                                                                                                                                                                                                                                                                                                                                                                                                                                                                                                                                   |                  |                        |                            |            |                      |                          |  |      |              |                        |                            |            |                      |                          |        |        |      |        |       |      |        |      |       |      |       |        |      |       |       |        |      |        |        |      |       |
|                                           |                                  | Dose                                                                                                                                                                                                                                                                                                                                                                                                                                                                                                                                                                                                                                                                               | Green Signal     | Actual Pct Green Cells | Normalized Pct Green Cells | Red Signal | Actual Pct Red Cells | Normalized Pct Red Cells |  |      |              |                        |                            |            |                      |                          |        |        |      |        |       |      |        |      |       |      |       |        |      |       |       |        |      |        |        |      |       |
|                                           |                                  | 0.1 uM                                                                                                                                                                                                                                                                                                                                                                                                                                                                                                                                                                                                                                                                             | 115.56           | 0.96                   | 282.14                     | 75.35      | 0.06                 | -30.42                   |  |      |              |                        |                            |            |                      |                          |        |        |      |        |       |      |        |      |       |      |       |        |      |       |       |        |      |        |        |      |       |
| 1 uM                                      | 96.76                            | 0.79                                                                                                                                                                                                                                                                                                                                                                                                                                                                                                                                                                                                                                                                               | 47.99            | 110.67                 | 0.17                       | 23.07      |                      |                          |  |      |              |                        |                            |            |                      |                          |        |        |      |        |       |      |        |      |       |      |       |        |      |       |       |        |      |        |        |      |       |
| 10 uM                                     | 105.43                           | 0.90                                                                                                                                                                                                                                                                                                                                                                                                                                                                                                                                                                                                                                                                               | 142.00           | 116.49                 | 0.18                       | 32.22      |                      |                          |  |      |              |                        |                            |            |                      |                          |        |        |      |        |       |      |        |      |       |      |       |        |      |       |       |        |      |        |        |      |       |

| Compound                | Normalized Values (A and B Sets) | Responses                                                                                                                                                                                                                                                                                                                                                                                                                                                                                                                                                                                                                                                                            |                  |                        |                            |            |                      |                          |  |      |              |                        |                            |            |                      |                          |        |        |      |        |       |      |        |      |       |      |       |        |      |        |       |        |      |        |        |      |        |
|-------------------------|----------------------------------|--------------------------------------------------------------------------------------------------------------------------------------------------------------------------------------------------------------------------------------------------------------------------------------------------------------------------------------------------------------------------------------------------------------------------------------------------------------------------------------------------------------------------------------------------------------------------------------------------------------------------------------------------------------------------------------|------------------|------------------------|----------------------------|------------|----------------------|--------------------------|--|------|--------------|------------------------|----------------------------|------------|----------------------|--------------------------|--------|--------|------|--------|-------|------|--------|------|-------|------|-------|--------|------|--------|-------|--------|------|--------|--------|------|--------|
| <b>Sulbactam sodium</b> |                                  | <table border="1"> <thead> <tr> <th colspan="7">Average Response</th> </tr> <tr> <th>Dose</th> <th>Green Signal</th> <th>Actual Pct Green Cells</th> <th>Normalized Pct Green Cells</th> <th>Red Signal</th> <th>Actual Pct Red Cells</th> <th>Normalized Pct Red Cells</th> </tr> </thead> <tbody> <tr> <td>0.1 uM</td> <td>101.90</td> <td>0.93</td> <td>132.49</td> <td>88.41</td> <td>0.07</td> <td>-23.54</td> </tr> <tr> <td>1 uM</td> <td>93.15</td> <td>0.80</td> <td>41.71</td> <td>100.61</td> <td>0.10</td> <td>-10.76</td> </tr> <tr> <td>10 uM</td> <td>116.27</td> <td>0.98</td> <td>514.32</td> <td>104.35</td> <td>0.10</td> <td>-12.00</td> </tr> </tbody> </table> | Average Response |                        |                            |            |                      |                          |  | Dose | Green Signal | Actual Pct Green Cells | Normalized Pct Green Cells | Red Signal | Actual Pct Red Cells | Normalized Pct Red Cells | 0.1 uM | 101.90 | 0.93 | 132.49 | 88.41 | 0.07 | -23.54 | 1 uM | 93.15 | 0.80 | 41.71 | 100.61 | 0.10 | -10.76 | 10 uM | 116.27 | 0.98 | 514.32 | 104.35 | 0.10 | -12.00 |
|                         |                                  | Average Response                                                                                                                                                                                                                                                                                                                                                                                                                                                                                                                                                                                                                                                                     |                  |                        |                            |            |                      |                          |  |      |              |                        |                            |            |                      |                          |        |        |      |        |       |      |        |      |       |      |       |        |      |        |       |        |      |        |        |      |        |
|                         |                                  | Dose                                                                                                                                                                                                                                                                                                                                                                                                                                                                                                                                                                                                                                                                                 | Green Signal     | Actual Pct Green Cells | Normalized Pct Green Cells | Red Signal | Actual Pct Red Cells | Normalized Pct Red Cells |  |      |              |                        |                            |            |                      |                          |        |        |      |        |       |      |        |      |       |      |       |        |      |        |       |        |      |        |        |      |        |
|                         |                                  | 0.1 uM                                                                                                                                                                                                                                                                                                                                                                                                                                                                                                                                                                                                                                                                               | 101.90           | 0.93                   | 132.49                     | 88.41      | 0.07                 | -23.54                   |  |      |              |                        |                            |            |                      |                          |        |        |      |        |       |      |        |      |       |      |       |        |      |        |       |        |      |        |        |      |        |
| 1 uM                    | 93.15                            | 0.80                                                                                                                                                                                                                                                                                                                                                                                                                                                                                                                                                                                                                                                                                 | 41.71            | 100.61                 | 0.10                       | -10.76     |                      |                          |  |      |              |                        |                            |            |                      |                          |        |        |      |        |       |      |        |      |       |      |       |        |      |        |       |        |      |        |        |      |        |
| 10 uM                   | 116.27                           | 0.98                                                                                                                                                                                                                                                                                                                                                                                                                                                                                                                                                                                                                                                                                 | 514.32           | 104.35                 | 0.10                       | -12.00     |                      |                          |  |      |              |                        |                            |            |                      |                          |        |        |      |        |       |      |        |      |       |      |       |        |      |        |       |        |      |        |        |      |        |

| Compound                    | Normalized Values (A and B Sets) | Responses                                                                                                                                                                                                                                                                                                                                                                                                                                                                                                                                                                                                                                                                       |                  |                        |                            |            |                      |                          |  |      |              |                        |                            |            |                      |                          |        |       |      |       |       |      |        |      |       |      |       |       |      |        |       |       |      |        |       |      |        |
|-----------------------------|----------------------------------|---------------------------------------------------------------------------------------------------------------------------------------------------------------------------------------------------------------------------------------------------------------------------------------------------------------------------------------------------------------------------------------------------------------------------------------------------------------------------------------------------------------------------------------------------------------------------------------------------------------------------------------------------------------------------------|------------------|------------------------|----------------------------|------------|----------------------|--------------------------|--|------|--------------|------------------------|----------------------------|------------|----------------------|--------------------------|--------|-------|------|-------|-------|------|--------|------|-------|------|-------|-------|------|--------|-------|-------|------|--------|-------|------|--------|
| <b>Sulfacetamide Sodium</b> |                                  | <table border="1"> <thead> <tr> <th colspan="7">Average Response</th> </tr> <tr> <th>Dose</th> <th>Green Signal</th> <th>Actual Pct Green Cells</th> <th>Normalized Pct Green Cells</th> <th>Red Signal</th> <th>Actual Pct Red Cells</th> <th>Normalized Pct Red Cells</th> </tr> </thead> <tbody> <tr> <td>0.1 uM</td> <td>92.23</td> <td>0.86</td> <td>18.57</td> <td>82.48</td> <td>0.04</td> <td>-43.18</td> </tr> <tr> <td>1 uM</td> <td>88.73</td> <td>0.75</td> <td>22.76</td> <td>75.44</td> <td>0.03</td> <td>-54.35</td> </tr> <tr> <td>10 uM</td> <td>72.60</td> <td>0.55</td> <td>203.83</td> <td>95.17</td> <td>0.08</td> <td>-23.92</td> </tr> </tbody> </table> | Average Response |                        |                            |            |                      |                          |  | Dose | Green Signal | Actual Pct Green Cells | Normalized Pct Green Cells | Red Signal | Actual Pct Red Cells | Normalized Pct Red Cells | 0.1 uM | 92.23 | 0.86 | 18.57 | 82.48 | 0.04 | -43.18 | 1 uM | 88.73 | 0.75 | 22.76 | 75.44 | 0.03 | -54.35 | 10 uM | 72.60 | 0.55 | 203.83 | 95.17 | 0.08 | -23.92 |
|                             |                                  | Average Response                                                                                                                                                                                                                                                                                                                                                                                                                                                                                                                                                                                                                                                                |                  |                        |                            |            |                      |                          |  |      |              |                        |                            |            |                      |                          |        |       |      |       |       |      |        |      |       |      |       |       |      |        |       |       |      |        |       |      |        |
|                             |                                  | Dose                                                                                                                                                                                                                                                                                                                                                                                                                                                                                                                                                                                                                                                                            | Green Signal     | Actual Pct Green Cells | Normalized Pct Green Cells | Red Signal | Actual Pct Red Cells | Normalized Pct Red Cells |  |      |              |                        |                            |            |                      |                          |        |       |      |       |       |      |        |      |       |      |       |       |      |        |       |       |      |        |       |      |        |
|                             |                                  | 0.1 uM                                                                                                                                                                                                                                                                                                                                                                                                                                                                                                                                                                                                                                                                          | 92.23            | 0.86                   | 18.57                      | 82.48      | 0.04                 | -43.18                   |  |      |              |                        |                            |            |                      |                          |        |       |      |       |       |      |        |      |       |      |       |       |      |        |       |       |      |        |       |      |        |
| 1 uM                        | 88.73                            | 0.75                                                                                                                                                                                                                                                                                                                                                                                                                                                                                                                                                                                                                                                                            | 22.76            | 75.44                  | 0.03                       | -54.35     |                      |                          |  |      |              |                        |                            |            |                      |                          |        |       |      |       |       |      |        |      |       |      |       |       |      |        |       |       |      |        |       |      |        |
| 10 uM                       | 72.60                            | 0.55                                                                                                                                                                                                                                                                                                                                                                                                                                                                                                                                                                                                                                                                            | 203.83           | 95.17                  | 0.08                       | -23.92     |                      |                          |  |      |              |                        |                            |            |                      |                          |        |       |      |       |       |      |        |      |       |      |       |       |      |        |       |       |      |        |       |      |        |

| Compound                | Normalized Values (A and B Sets) | Responses                                                                                                                                                                                                                                                                                                                                                                                                                                                                                                                                                     |                  |                        |                            |            |                      |                          |  |      |              |                        |                            |            |                      |                          |        |       |      |       |       |      |        |      |       |      |        |        |      |        |
|-------------------------|----------------------------------|---------------------------------------------------------------------------------------------------------------------------------------------------------------------------------------------------------------------------------------------------------------------------------------------------------------------------------------------------------------------------------------------------------------------------------------------------------------------------------------------------------------------------------------------------------------|------------------|------------------------|----------------------------|------------|----------------------|--------------------------|--|------|--------------|------------------------|----------------------------|------------|----------------------|--------------------------|--------|-------|------|-------|-------|------|--------|------|-------|------|--------|--------|------|--------|
| <b>Sunitinib Malate</b> |                                  | <table border="1"> <thead> <tr> <th colspan="7">Average Response</th> </tr> <tr> <th>Dose</th> <th>Green Signal</th> <th>Actual Pct Green Cells</th> <th>Normalized Pct Green Cells</th> <th>Red Signal</th> <th>Actual Pct Red Cells</th> <th>Normalized Pct Red Cells</th> </tr> </thead> <tbody> <tr> <td>0.1 uM</td> <td>86.27</td> <td>0.81</td> <td>17.23</td> <td>78.81</td> <td>0.02</td> <td>-63.80</td> </tr> <tr> <td>1 uM</td> <td>77.21</td> <td>0.64</td> <td>183.06</td> <td>107.23</td> <td>0.05</td> <td>-32.41</td> </tr> </tbody> </table> | Average Response |                        |                            |            |                      |                          |  | Dose | Green Signal | Actual Pct Green Cells | Normalized Pct Green Cells | Red Signal | Actual Pct Red Cells | Normalized Pct Red Cells | 0.1 uM | 86.27 | 0.81 | 17.23 | 78.81 | 0.02 | -63.80 | 1 uM | 77.21 | 0.64 | 183.06 | 107.23 | 0.05 | -32.41 |
|                         |                                  | Average Response                                                                                                                                                                                                                                                                                                                                                                                                                                                                                                                                              |                  |                        |                            |            |                      |                          |  |      |              |                        |                            |            |                      |                          |        |       |      |       |       |      |        |      |       |      |        |        |      |        |
|                         |                                  | Dose                                                                                                                                                                                                                                                                                                                                                                                                                                                                                                                                                          | Green Signal     | Actual Pct Green Cells | Normalized Pct Green Cells | Red Signal | Actual Pct Red Cells | Normalized Pct Red Cells |  |      |              |                        |                            |            |                      |                          |        |       |      |       |       |      |        |      |       |      |        |        |      |        |
| 0.1 uM                  | 86.27                            | 0.81                                                                                                                                                                                                                                                                                                                                                                                                                                                                                                                                                          | 17.23            | 78.81                  | 0.02                       | -63.80     |                      |                          |  |      |              |                        |                            |            |                      |                          |        |       |      |       |       |      |        |      |       |      |        |        |      |        |
| 1 uM                    | 77.21                            | 0.64                                                                                                                                                                                                                                                                                                                                                                                                                                                                                                                                                          | 183.06           | 107.23                 | 0.05                       | -32.41     |                      |                          |  |      |              |                        |                            |            |                      |                          |        |       |      |       |       |      |        |      |       |      |        |        |      |        |



| Compound | Normalized Values (A and B Sets) | Responses |        |      |        |        |      |        |
|----------|----------------------------------|-----------|--------|------|--------|--------|------|--------|
|          |                                  | 10 uM     | 203.30 | 0.98 | 169.03 | 107.05 | 0.06 | -27.00 |

| Compound                  | Normalized Values (A and B Sets) | Responses               |              |                        |                            |            |                      |                          |
|---------------------------|----------------------------------|-------------------------|--------------|------------------------|----------------------------|------------|----------------------|--------------------------|
| <b>Suplatast Tosylate</b> |                                  | <b>Average Response</b> |              |                        |                            |            |                      |                          |
|                           |                                  | Dose                    | Green Signal | Actual Pct Green Cells | Normalized Pct Green Cells | Red Signal | Actual Pct Red Cells | Normalized Pct Red Cells |
|                           |                                  | 0.1 uM                  | 104.26       | 0.85                   | 83.81                      | 87.16      | 0.05                 | -44.92                   |
|                           |                                  | 1 uM                    | 98.87        | 0.88                   | 79.48                      | 109.09     | 0.12                 | -1.89                    |
| 10 uM                     | 103.41                           | 0.87                    | 92.62        | 107.37                 | 0.10                       | -15.66     |                      |                          |

| Compound                    | Normalized Values (A and B Sets) | Responses               |              |                        |                            |            |                      |                          |
|-----------------------------|----------------------------------|-------------------------|--------------|------------------------|----------------------------|------------|----------------------|--------------------------|
| <b>Suvorexant (MK-4305)</b> |                                  | <b>Average Response</b> |              |                        |                            |            |                      |                          |
|                             |                                  | Dose                    | Green Signal | Actual Pct Green Cells | Normalized Pct Green Cells | Red Signal | Actual Pct Red Cells | Normalized Pct Red Cells |
|                             |                                  | 0.1 uM                  | 99.75        | 0.91                   | 119.18                     | 72.05      | 0.01                 | -69.91                   |
|                             |                                  | 1 uM                    | 106.66       | 0.90                   | 222.38                     | 69.25      | 0.02                 | -40.10                   |
| 10 uM                       | 86.35                            | 0.86                    | 44.23        | 66.94                  | 0.06                       | -24.41     |                      |                          |

| Compound             | Normalized Values (A and B Sets) | Responses               |              |                        |                            |            |                      |                          |
|----------------------|----------------------------------|-------------------------|--------------|------------------------|----------------------------|------------|----------------------|--------------------------|
| <b>Syneprine HCl</b> |                                  | <b>Average Response</b> |              |                        |                            |            |                      |                          |
|                      |                                  | Dose                    | Green Signal | Actual Pct Green Cells | Normalized Pct Green Cells | Red Signal | Actual Pct Red Cells | Normalized Pct Red Cells |
|                      |                                  | 0.1 uM                  | 91.05        | 0.77                   | -42.78                     | 76.97      | 0.03                 | -42.20                   |
|                      |                                  | 1 uM                    | 96.00        | 0.80                   | 42.75                      | 79.12      | 0.04                 | -36.46                   |
| 10 uM                | 100.28                           | 0.90                    | 199.00       | 86.94                  | 0.06                       | -29.81     |                      |                          |

| Compound        | Normalized Values (A and B Sets) | Responses               |              |                        |                            |            |                      |                          |
|-----------------|----------------------------------|-------------------------|--------------|------------------------|----------------------------|------------|----------------------|--------------------------|
| <b>T0070907</b> |                                  | <b>Average Response</b> |              |                        |                            |            |                      |                          |
|                 |                                  | Dose                    | Green Signal | Actual Pct Green Cells | Normalized Pct Green Cells | Red Signal | Actual Pct Red Cells | Normalized Pct Red Cells |
|                 |                                  | 0.1 uM                  | 94.56        | 0.91                   | 9.08                       | 65.38      | 0.02                 | -55.90                   |
|                 |                                  | 1 uM                    | 98.67        | 0.88                   | 120.18                     | 79.36      | 0.03                 | -51.87                   |
| 10 uM           | 102.99                           | 0.89                    | 144.20       | 71.01                  | 0.02                       | -54.79     |                      |                          |

| Compound        | Normalized Values (A and B Sets) | Responses               |              |                        |                            |            |                      |
|-----------------|----------------------------------|-------------------------|--------------|------------------------|----------------------------|------------|----------------------|
| <b>T0901317</b> |                                  | <b>Average Response</b> |              |                        |                            |            |                      |
|                 |                                  | Dose                    | Green Signal | Actual Pct Green Cells | Normalized Pct Green Cells | Red Signal | Actual Pct Red Cells |

Compound

Normalized Values (A and B Sets)

Responses

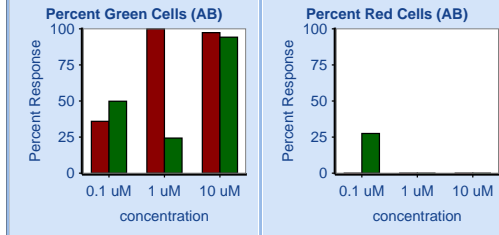

|        |        |      |        |       |      |        |
|--------|--------|------|--------|-------|------|--------|
| 0.1 uM | 89.75  | 0.86 | 42.89  | 88.37 | 0.09 | -14.95 |
| 1 uM   | 105.17 | 0.87 | 102.76 | 97.01 | 0.10 | -16.34 |
| 10 uM  | 95.38  | 0.87 | 95.79  | 84.47 | 0.04 | -43.92 |

Compound

Normalized Values (A and B Sets)

Responses

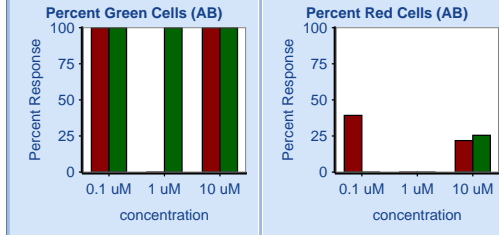

Average Response

| Dose   | Green Signal | Actual Pct Green Cells | Normalized Pct Green Cells | Red Signal | Actual Pct Red Cells | Normalized Pct Red Cells |
|--------|--------------|------------------------|----------------------------|------------|----------------------|--------------------------|
| 0.1 uM | 108.93       | 0.95                   | 162.06                     | 94.20      | 0.11                 | -6.64                    |
| 1 uM   | 88.84        | 0.78                   | 49.25                      | 79.44      | 0.04                 | -37.30                   |
| 10 uM  | 113.87       | 0.95                   | 470.80                     | 113.96     | 0.17                 | 23.64                    |

TAE226 (NVP-TAE226)

Compound

Normalized Values (A and B Sets)

Responses

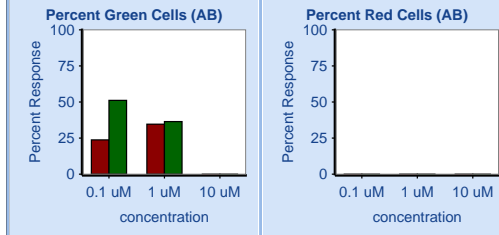

Average Response

| Dose   | Green Signal | Actual Pct Green Cells | Normalized Pct Green Cells | Red Signal | Actual Pct Red Cells | Normalized Pct Red Cells |
|--------|--------------|------------------------|----------------------------|------------|----------------------|--------------------------|
| 0.1 uM | 91.61        | 0.83                   | 37.44                      | 79.34      | 0.05                 | -30.28                   |
| 1 uM   | 88.69        | 0.77                   | 35.54                      | 76.95      | 0.03                 | -42.30                   |
| 10 uM  | 82.48        | 0.82                   | 279.10                     | 89.55      | 0.06                 | -31.62                   |

TAK-285

Compound

Normalized Values (A and B Sets)

Responses

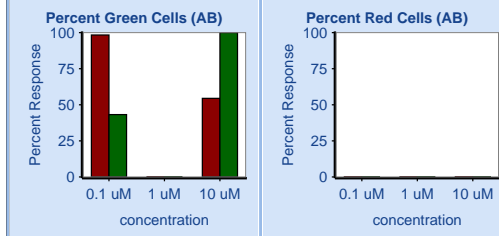

Average Response

| Dose   | Green Signal | Actual Pct Green Cells | Normalized Pct Green Cells | Red Signal | Actual Pct Red Cells | Normalized Pct Red Cells |
|--------|--------------|------------------------|----------------------------|------------|----------------------|--------------------------|
| 0.1 uM | 93.84        | 0.85                   | 70.79                      | 87.41      | 0.04                 | -50.42                   |
| 1 uM   | 70.85        | 0.61                   | 893.04                     | 73.53      | 0.04                 | -23.62                   |
| 10 uM  | 93.84        | 0.92                   | 94.96                      | 74.83      | 0.03                 | -39.25                   |

TAK-438

Compound

Normalized Values (A and B Sets)

Responses

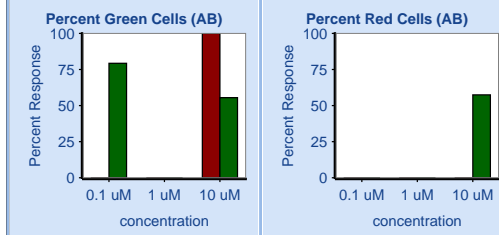

Average Response

| Dose   | Green Signal | Actual Pct Green Cells | Normalized Pct Green Cells | Red Signal | Actual Pct Red Cells | Normalized Pct Red Cells |
|--------|--------------|------------------------|----------------------------|------------|----------------------|--------------------------|
| 0.1 uM | 84.86        | 0.80                   | 17.10                      | 71.62      | 0.03                 | -56.47                   |
| 1 uM   | 80.21        | 0.75                   | 332.25                     | 66.74      | 0.02                 | -37.51                   |
| 10 uM  | 85.75        | 0.91                   | 94.64                      | 95.98      | 0.14                 | 9.89                     |

TAK-632

Compound

Normalized Values (A and B Sets)

Responses

|                            |       |                         |              |                        |                            |            |                      |                          |
|----------------------------|-------|-------------------------|--------------|------------------------|----------------------------|------------|----------------------|--------------------------|
| <b>TAK-700 (Orteronel)</b> |       | <b>Average Response</b> |              |                        |                            |            |                      |                          |
|                            |       | Dose                    | Green Signal | Actual Pct Green Cells | Normalized Pct Green Cells | Red Signal | Actual Pct Red Cells | Normalized Pct Red Cells |
|                            |       | 0.1 uM                  | 108.14       | 0.92                   | 111.47                     | 99.10      | 0.09                 | -21.40                   |
|                            |       | 1 uM                    | 95.43        | 0.75                   | -6.58                      | 107.56     | 0.10                 | -9.34                    |
| 10 uM                      | 98.36 | 0.85                    | 83.81        | 115.14                 | 0.11                       | -8.92      |                      |                          |

Compound

Normalized Values (A and B Sets)

Responses

|                |        |                         |              |                        |                            |            |                      |                          |
|----------------|--------|-------------------------|--------------|------------------------|----------------------------|------------|----------------------|--------------------------|
| <b>TAK-715</b> |        | <b>Average Response</b> |              |                        |                            |            |                      |                          |
|                |        | Dose                    | Green Signal | Actual Pct Green Cells | Normalized Pct Green Cells | Red Signal | Actual Pct Red Cells | Normalized Pct Red Cells |
|                |        | 0.1 uM                  | 87.82        | 0.85                   | 73.61                      | 86.79      | 0.10                 | -10.10                   |
|                |        | 1 uM                    | 88.39        | 0.76                   | 22.42                      | 65.22      | 0.01                 | -62.76                   |
| 10 uM          | 102.55 | 0.92                    | 145.29       | 107.19                 | 0.12                       | 1.32       |                      |                          |

Compound

Normalized Values (A and B Sets)

Responses

|                |       |                         |              |                        |                            |            |                      |                          |
|----------------|-------|-------------------------|--------------|------------------------|----------------------------|------------|----------------------|--------------------------|
| <b>TAK-733</b> |       | <b>Average Response</b> |              |                        |                            |            |                      |                          |
|                |       | Dose                    | Green Signal | Actual Pct Green Cells | Normalized Pct Green Cells | Red Signal | Actual Pct Red Cells | Normalized Pct Red Cells |
|                |       | 0.1 uM                  | 91.26        | 0.86                   | 56.01                      | 95.42      | 0.13                 | 9.72                     |
|                |       | 1 uM                    | 86.89        | 0.72                   | 6.63                       | 81.07      | 0.07                 | -26.02                   |
| 10 uM          | 84.04 | 0.88                    | 32.09        | 85.46                  | 0.03                       | -43.06     |                      |                          |

Compound

Normalized Values (A and B Sets)

Responses

|                |       |                         |              |                        |                            |            |                      |                          |
|----------------|-------|-------------------------|--------------|------------------------|----------------------------|------------|----------------------|--------------------------|
| <b>TAK-875</b> |       | <b>Average Response</b> |              |                        |                            |            |                      |                          |
|                |       | Dose                    | Green Signal | Actual Pct Green Cells | Normalized Pct Green Cells | Red Signal | Actual Pct Red Cells | Normalized Pct Red Cells |
|                |       | 0.1 uM                  | 100.81       | 0.93                   | 135.84                     | 113.51     | 0.17                 | 22.52                    |
|                |       | 1 uM                    | 113.61       | 0.93                   | 116.93                     | 91.73      | 0.08                 | -22.50                   |
| 10 uM          | 94.51 | 0.88                    | 27.74        | 79.48                  | 0.04                       | -41.01     |                      |                          |

Compound

Normalized Values (A and B Sets)

Responses

|                |       |                         |              |                        |                            |            |                      |                          |
|----------------|-------|-------------------------|--------------|------------------------|----------------------------|------------|----------------------|--------------------------|
| <b>TAK-901</b> |       | <b>Average Response</b> |              |                        |                            |            |                      |                          |
|                |       | Dose                    | Green Signal | Actual Pct Green Cells | Normalized Pct Green Cells | Red Signal | Actual Pct Red Cells | Normalized Pct Red Cells |
|                |       | 0.1 uM                  | 92.27        | 0.82                   | 45.97                      | 79.05      | 0.03                 | -55.48                   |
|                |       | 1 uM                    | 102.08       | 0.91                   | -81.85                     | 93.17      | 0.10                 | -7.85                    |
| 10 uM          | 99.77 | 0.81                    | -4.40        | 94.21                  | 0.17                       | 21.80      |                      |                          |

Compound

Normalized Values (A and B Sets)

Responses

| Talc  |       |      | Average Response |              |                        |                            |            |                      |                          |
|-------|-------|------|------------------|--------------|------------------------|----------------------------|------------|----------------------|--------------------------|
|       |       |      | Dose             | Green Signal | Actual Pct Green Cells | Normalized Pct Green Cells | Red Signal | Actual Pct Red Cells | Normalized Pct Red Cells |
|       |       |      | 0.1 uM           | 94.07        | 0.84                   | 58.68                      | 98.36      | 0.09                 | -28.16                   |
|       |       |      | 1 uM             | 90.02        | 0.73                   | 133.29                     | 117.36     | 0.14                 | 8.54                     |
| 10 uM | 84.93 | 0.75 | 14.09            | 117.77       | 0.12                   | -8.84                      |            |                      |                          |

Compound

Normalized Values (A and B Sets)

Responses

| TAME  |        |      | Average Response |              |                        |                            |            |                      |                          |
|-------|--------|------|------------------|--------------|------------------------|----------------------------|------------|----------------------|--------------------------|
|       |        |      | Dose             | Green Signal | Actual Pct Green Cells | Normalized Pct Green Cells | Red Signal | Actual Pct Red Cells | Normalized Pct Red Cells |
|       |        |      | 0.1 uM           | 96.29        | 0.89                   | 94.43                      | 81.73      | 0.04                 | -35.66                   |
|       |        |      | 1 uM             | 93.29        | 0.76                   | 23.62                      | 77.16      | 0.03                 | -40.76                   |
| 10 uM | 100.28 | 0.94 | 314.10           | 79.83        | 0.02                   | -49.90                     |            |                      |                          |

Compound

Normalized Values (A and B Sets)

Responses

| Tamibarotene |        |      | Average Response |              |                        |                            |            |                      |                          |
|--------------|--------|------|------------------|--------------|------------------------|----------------------------|------------|----------------------|--------------------------|
|              |        |      | Dose             | Green Signal | Actual Pct Green Cells | Normalized Pct Green Cells | Red Signal | Actual Pct Red Cells | Normalized Pct Red Cells |
|              |        |      | 0.1 uM           | 84.04        | 0.71                   | -33.17                     | 97.38      | 0.12                 | -5.48                    |
|              |        |      | 1 uM             | 104.95       | 0.88                   | 113.75                     | 99.36      | 0.13                 | -3.94                    |
| 10 uM        | 102.37 | 0.87 | 88.28            | 107.76       | 0.13                   | 4.60                       |            |                      |                          |

Compound

Normalized Values (A and B Sets)

Responses

| Tanshinone I |       |      | Average Response |              |                        |                            |            |                      |                          |
|--------------|-------|------|------------------|--------------|------------------------|----------------------------|------------|----------------------|--------------------------|
|              |       |      | Dose             | Green Signal | Actual Pct Green Cells | Normalized Pct Green Cells | Red Signal | Actual Pct Red Cells | Normalized Pct Red Cells |
|              |       |      | 0.1 uM           | 81.49        | 0.74                   | -72.62                     | 75.41      | 0.03                 | -37.62                   |
|              |       |      | 1 uM             | 92.32        | 0.81                   | 60.98                      | 76.38      | 0.02                 | -48.24                   |
| 10 uM        | 94.77 | 0.92 | 289.56           | 77.33        | 0.02                   | -49.93                     |            |                      |                          |

Compound

Normalized Values (A and B Sets)

Responses

| Tariquidar |       |      | Average Response |              |                        |                            |            |                      |                          |
|------------|-------|------|------------------|--------------|------------------------|----------------------------|------------|----------------------|--------------------------|
|            |       |      | Dose             | Green Signal | Actual Pct Green Cells | Normalized Pct Green Cells | Red Signal | Actual Pct Red Cells | Normalized Pct Red Cells |
|            |       |      | 0.1 uM           | 89.58        | 0.82                   | 41.25                      | 90.51      | 0.06                 | -39.96                   |
|            |       |      | 1 uM             | 79.51        | 0.71                   | 748.04                     | 91.79      | 0.11                 | 18.83                    |
| 10 uM      | 75.16 | 0.69 |                  | 70.32        | 0.01                   | -45.15                     |            |                      |                          |



Compound

Normalized Values (A and B Sets)

Responses

|       |        |                         |              |                        |                            |            |                      |                          |
|-------|--------|-------------------------|--------------|------------------------|----------------------------|------------|----------------------|--------------------------|
|       |        | <b>Average Response</b> |              |                        |                            |            |                      |                          |
|       |        | Dose                    | Green Signal | Actual Pct Green Cells | Normalized Pct Green Cells | Red Signal | Actual Pct Red Cells | Normalized Pct Red Cells |
|       |        | 0.1 uM                  | 85.69        | 0.80                   | -12.58                     | 81.48      | 0.03                 | -38.56                   |
|       |        | 1 uM                    | 98.46        | 0.85                   | 77.12                      | 96.19      | 0.09                 | -14.27                   |
| 10 uM | 103.54 | 0.94                    | 444.08       | 83.31                  | 0.03                       | -42.73     |                      |                          |

Compound

Normalized Values (A and B Sets)

Responses

|                     |        |                         |              |                        |                            |            |                      |                          |
|---------------------|--------|-------------------------|--------------|------------------------|----------------------------|------------|----------------------|--------------------------|
| Telaprevir (VX-950) |        | <b>Average Response</b> |              |                        |                            |            |                      |                          |
|                     |        | Dose                    | Green Signal | Actual Pct Green Cells | Normalized Pct Green Cells | Red Signal | Actual Pct Red Cells | Normalized Pct Red Cells |
|                     |        | 0.1 uM                  | 100.07       | 0.84                   | 2.88                       | 101.79     | 0.08                 | -31.65                   |
|                     |        | 1 uM                    | 95.91        | 0.81                   | 7.25                       | 94.44      | 0.06                 | -29.84                   |
| 10 uM               | 104.31 | 0.86                    | 87.69        | 99.72                  | 0.06                       | -27.80     |                      |                          |

Compound

Normalized Values (A and B Sets)

Responses

|           |        |                         |              |                        |                            |            |                      |                          |
|-----------|--------|-------------------------|--------------|------------------------|----------------------------|------------|----------------------|--------------------------|
| Telatinib |        | <b>Average Response</b> |              |                        |                            |            |                      |                          |
|           |        | Dose                    | Green Signal | Actual Pct Green Cells | Normalized Pct Green Cells | Red Signal | Actual Pct Red Cells | Normalized Pct Red Cells |
|           |        | 0.1 uM                  | 94.19        | 0.89                   | 92.96                      | 75.86      | 0.02                 | -46.59                   |
|           |        | 1 uM                    | 105.41       | 0.88                   | 87.44                      | 76.70      | 0.03                 | -42.67                   |
| 10 uM     | 106.14 | 0.97                    | 484.81       | 95.44                  | 0.08                       | -17.98     |                      |                          |

Compound

Normalized Values (A and B Sets)

Responses

|             |        |                         |              |                        |                            |            |                      |                          |
|-------------|--------|-------------------------|--------------|------------------------|----------------------------|------------|----------------------|--------------------------|
| Telbivudine |        | <b>Average Response</b> |              |                        |                            |            |                      |                          |
|             |        | Dose                    | Green Signal | Actual Pct Green Cells | Normalized Pct Green Cells | Red Signal | Actual Pct Red Cells | Normalized Pct Red Cells |
|             |        | 0.1 uM                  | 106.07       | 0.90                   | 93.98                      | 107.82     | 0.12                 | -6.83                    |
|             |        | 1 uM                    | 111.17       | 0.88                   | 49.11                      | 100.61     | 0.08                 | -19.40                   |
| 10 uM       | 104.09 | 0.86                    | 89.11        | 102.01                 | 0.06                       | -26.71     |                      |                          |

Compound

Normalized Values (A and B Sets)

Responses

|                |        |                         |              |                        |                            |            |                      |                          |
|----------------|--------|-------------------------|--------------|------------------------|----------------------------|------------|----------------------|--------------------------|
| Temocapril HCl |        | <b>Average Response</b> |              |                        |                            |            |                      |                          |
|                |        | Dose                    | Green Signal | Actual Pct Green Cells | Normalized Pct Green Cells | Red Signal | Actual Pct Red Cells | Normalized Pct Red Cells |
|                |        | 0.1 uM                  | 98.29        | 0.86                   | 73.81                      | 97.32      | 0.08                 | -33.57                   |
|                |        | 1 uM                    | 111.87       | 0.91                   | 113.18                     | 101.05     | 0.10                 | -11.38                   |
| 10 uM          | 107.93 | 0.88                    | 101.61       | 109.71                 | 0.10                       | -12.25     |                      |                          |

Compound

Normalized Values (A and B Sets)

Responses

| Tempol | Percent Green Cells (AB) |  | Percent Red Cells (AB)  |  | Average Response |              |                        |                            |            |                      |                          |
|--------|--------------------------|--|-------------------------|--|------------------|--------------|------------------------|----------------------------|------------|----------------------|--------------------------|
|        | 100<br>Percent Response  |  | 100<br>Percent Response |  | Dose             | Green Signal | Actual Pct Green Cells | Normalized Pct Green Cells | Red Signal | Actual Pct Red Cells | Normalized Pct Red Cells |
|        | 0.1 uM                   |  | 1 uM                    |  | 0.1 uM           | 86.09        | 0.82                   | -71.81                     | 77.53      | 0.03                 | -49.73                   |
|        | 0                        |  | 0                       |  | 1 uM             | 99.04        | 0.89                   | 124.31                     | 75.93      | 0.04                 | -46.91                   |
|        | 10 uM                    |  | 10 uM                   |  | 10 uM            | 95.31        | 0.85                   | 71.81                      | 98.21      | 0.09                 | -17.26                   |

Compound

Normalized Values (A and B Sets)

Responses

| Temsirolimus (CCI-779, NSC 683864) | Percent Green Cells (AB) |  | Percent Red Cells (AB)  |  | Average Response |              |                        |                            |            |                      |                          |
|------------------------------------|--------------------------|--|-------------------------|--|------------------|--------------|------------------------|----------------------------|------------|----------------------|--------------------------|
|                                    | 100<br>Percent Response  |  | 100<br>Percent Response |  | Dose             | Green Signal | Actual Pct Green Cells | Normalized Pct Green Cells | Red Signal | Actual Pct Red Cells | Normalized Pct Red Cells |
|                                    | 0.1 uM                   |  | 1 uM                    |  | 0.1 uM           | 88.88        | 0.85                   | 20.13                      | 73.45      | 0.02                 | -64.08                   |
|                                    | 0                        |  | 0                       |  | 1 uM             | 93.54        | 0.88                   | 114.22                     | 87.65      | 0.03                 | -45.40                   |
|                                    | 10 uM                    |  | 10 uM                   |  | 10 uM            | 99.77        | 0.91                   | 117.64                     | 98.83      | 0.05                 | -33.30                   |

Compound

Normalized Values (A and B Sets)

Responses

| Tenatoprazole | Percent Green Cells (AB) |  | Percent Red Cells (AB)  |  | Average Response |              |                        |                            |            |                      |                          |
|---------------|--------------------------|--|-------------------------|--|------------------|--------------|------------------------|----------------------------|------------|----------------------|--------------------------|
|               | 100<br>Percent Response  |  | 100<br>Percent Response |  | Dose             | Green Signal | Actual Pct Green Cells | Normalized Pct Green Cells | Red Signal | Actual Pct Red Cells | Normalized Pct Red Cells |
|               | 0.1 uM                   |  | 1 uM                    |  | 0.1 uM           | 107.20       | 0.91                   | 163.19                     | 81.28      | 0.05                 | -37.64                   |
|               | 0                        |  | 0                       |  | 1 uM             | 94.75        | 0.84                   | 82.67                      | 85.38      | 0.06                 | -37.73                   |
|               | 10 uM                    |  | 10 uM                   |  | 10 uM            | 96.30        | 0.80                   | 89.85                      | 85.77      | 0.05                 | -39.65                   |

Compound

Normalized Values (A and B Sets)

Responses

| Teniposide | Percent Green Cells (AB) |  | Percent Red Cells (AB)  |  | Average Response |              |                        |                            |            |                      |                          |
|------------|--------------------------|--|-------------------------|--|------------------|--------------|------------------------|----------------------------|------------|----------------------|--------------------------|
|            | 100<br>Percent Response  |  | 100<br>Percent Response |  | Dose             | Green Signal | Actual Pct Green Cells | Normalized Pct Green Cells | Red Signal | Actual Pct Red Cells | Normalized Pct Red Cells |
|            | 0.1 uM                   |  | 1 uM                    |  | 0.1 uM           | 105.82       | 0.91                   | 101.88                     | 97.64      | 0.08                 | -31.46                   |
|            | 0                        |  | 0                       |  | 1 uM             | 111.99       | 0.81                   | -17.05                     | 119.81     | 0.15                 | 13.15                    |
|            | 10 uM                    |  | 10 uM                   |  | 10 uM            | 79.97        | 0.62                   | -89.76                     | 101.59     | 0.08                 | -14.11                   |

Compound

Normalized Values (A and B Sets)

Responses

| Tenofovir | Percent Green Cells (AB) |  | Percent Red Cells (AB)  |  | Average Response |              |                        |                            |            |                      |                          |
|-----------|--------------------------|--|-------------------------|--|------------------|--------------|------------------------|----------------------------|------------|----------------------|--------------------------|
|           | 100<br>Percent Response  |  | 100<br>Percent Response |  | Dose             | Green Signal | Actual Pct Green Cells | Normalized Pct Green Cells | Red Signal | Actual Pct Red Cells | Normalized Pct Red Cells |
|           | 0.1 uM                   |  | 1 uM                    |  | 0.1 uM           | 97.84        | 0.85                   | 54.91                      | 81.27      | 0.03                 | -52.96                   |
|           | 0                        |  | 0                       |  | 1 uM             | 107.08       | 0.87                   | 107.73                     | 89.70      | 0.05                 | -36.26                   |
|           | 10 uM                    |  | 10 uM                   |  | 10 uM            | 94.18        | 0.80                   | 50.94                      | 104.58     | 0.07                 | -19.79                   |



Compound

Normalized Values (A and B Sets)

Responses

| Tenofovir Disoproxil Fumarate | Percent Green Cells (AB) |  | Percent Red Cells (AB)  |  | Average Response |              |                        |                            |            |                      |                          |
|-------------------------------|--------------------------|--|-------------------------|--|------------------|--------------|------------------------|----------------------------|------------|----------------------|--------------------------|
|                               | 100<br>Percent Response  |  | 100<br>Percent Response |  | Dose             | Green Signal | Actual Pct Green Cells | Normalized Pct Green Cells | Red Signal | Actual Pct Red Cells | Normalized Pct Red Cells |
|                               | 0 25 50 75 100           |  | 0 25 50 75 100          |  | 0.1 uM           | 97.83        | 0.84                   | 69.29                      | 109.98     | 0.13                 | -10.46                   |
|                               | 0.1 uM 1 uM 10 uM        |  | 0.1 uM 1 uM 10 uM       |  | 1 uM             | 87.85        | 0.75                   | 10.75                      | 80.17      | 0.03                 | -45.50                   |
|                               |                          |  |                         |  | 10 uM            | 97.06        | 0.81                   | 60.09                      | 118.06     | 0.12                 | -1.81                    |

Compound

Normalized Values (A and B Sets)

Responses

| Tenovin-1 | Percent Green Cells (AB) |  | Percent Red Cells (AB)  |  | Average Response |              |                        |                            |            |                      |                          |
|-----------|--------------------------|--|-------------------------|--|------------------|--------------|------------------------|----------------------------|------------|----------------------|--------------------------|
|           | 100<br>Percent Response  |  | 100<br>Percent Response |  | Dose             | Green Signal | Actual Pct Green Cells | Normalized Pct Green Cells | Red Signal | Actual Pct Red Cells | Normalized Pct Red Cells |
|           | 0 25 50 75 100           |  | 0 25 50 75 100          |  | 0.1 uM           | 98.28        | 0.86                   | 82.83                      | 76.74      | 0.03                 | -59.12                   |
|           | 0.1 uM 1 uM 10 uM        |  | 0.1 uM 1 uM 10 uM       |  | 1 uM             | 92.63        | 0.87                   | 61.32                      | 73.64      | 0.03                 | -28.68                   |
|           |                          |  |                         |  | 10 uM            | 82.08        | 0.75                   | -64.53                     | 71.19      | 0.04                 | -34.13                   |

Compound

Normalized Values (A and B Sets)

Responses

| Terazosin HCl | Percent Green Cells (AB) |  | Percent Red Cells (AB)  |  | Average Response |              |                        |                            |            |                      |                          |
|---------------|--------------------------|--|-------------------------|--|------------------|--------------|------------------------|----------------------------|------------|----------------------|--------------------------|
|               | 100<br>Percent Response  |  | 100<br>Percent Response |  | Dose             | Green Signal | Actual Pct Green Cells | Normalized Pct Green Cells | Red Signal | Actual Pct Red Cells | Normalized Pct Red Cells |
|               | 0 25 50 75 100           |  | 0 25 50 75 100          |  | 0.1 uM           | 100.21       | 0.88                   | 62.09                      | 113.02     | 0.14                 | 4.64                     |
|               | 0.1 uM 1 uM 10 uM        |  | 0.1 uM 1 uM 10 uM       |  | 1 uM             | 118.26       | 0.91                   | 115.64                     | 127.62     | 0.21                 | 37.61                    |
|               |                          |  |                         |  | 10 uM            | 102.06       | 0.87                   | 96.20                      | 94.52      | 0.06                 | -26.14                   |

Compound

Normalized Values (A and B Sets)

Responses

| Terbinafine | Percent Green Cells (AB) |  | Percent Red Cells (AB)  |  | Average Response |              |                        |                            |            |                      |                          |
|-------------|--------------------------|--|-------------------------|--|------------------|--------------|------------------------|----------------------------|------------|----------------------|--------------------------|
|             | 100<br>Percent Response  |  | 100<br>Percent Response |  | Dose             | Green Signal | Actual Pct Green Cells | Normalized Pct Green Cells | Red Signal | Actual Pct Red Cells | Normalized Pct Red Cells |
|             | 0 25 50 75 100           |  | 0 25 50 75 100          |  | 0.1 uM           | 97.59        | 0.88                   | 96.58                      | 81.12      | 0.02                 | -61.22                   |
|             | 0.1 uM 1 uM 10 uM        |  | 0.1 uM 1 uM 10 uM       |  | 1 uM             | 103.18       | 0.88                   | 109.48                     | 101.40     | 0.08                 | -21.35                   |
|             |                          |  |                         |  | 10 uM            | 99.65        | 0.82                   | 68.38                      | 131.56     | 0.16                 | 15.58                    |

Compound

Normalized Values (A and B Sets)

Responses

| Teriflunomide | Percent Green Cells (AB) |  | Percent Red Cells (AB)  |  | Average Response |              |                        |                            |            |                      |                          |
|---------------|--------------------------|--|-------------------------|--|------------------|--------------|------------------------|----------------------------|------------|----------------------|--------------------------|
|               | 100<br>Percent Response  |  | 100<br>Percent Response |  | Dose             | Green Signal | Actual Pct Green Cells | Normalized Pct Green Cells | Red Signal | Actual Pct Red Cells | Normalized Pct Red Cells |
|               | 0 25 50 75 100           |  | 0 25 50 75 100          |  | 0.1 uM           | 95.41        | 0.89                   | 170.14                     | 105.88     | 0.13                 | 4.46                     |
|               | 0.1 uM 1 uM 10 uM        |  | 0.1 uM 1 uM 10 uM       |  | 1 uM             | 99.79        | 0.83                   | 78.05                      | 96.01      | 0.10                 | -15.74                   |
|               |                          |  |                         |  | 10 uM            | 105.87       | 0.91                   | 124.10                     | 103.53     | 0.12                 | 2.86                     |

| Compound                        | Normalized Values (A and B Sets) | Responses                                                                                                                                                                                                                                                                                                                                                                                                                                                                                                                                                                                                                                                                       |                  |                        |                            |            |                      |                          |  |      |              |                        |                            |            |                      |                          |        |       |      |       |       |      |        |      |       |      |       |       |      |        |       |       |      |        |       |      |        |
|---------------------------------|----------------------------------|---------------------------------------------------------------------------------------------------------------------------------------------------------------------------------------------------------------------------------------------------------------------------------------------------------------------------------------------------------------------------------------------------------------------------------------------------------------------------------------------------------------------------------------------------------------------------------------------------------------------------------------------------------------------------------|------------------|------------------------|----------------------------|------------|----------------------|--------------------------|--|------|--------------|------------------------|----------------------------|------------|----------------------|--------------------------|--------|-------|------|-------|-------|------|--------|------|-------|------|-------|-------|------|--------|-------|-------|------|--------|-------|------|--------|
| <b>Tetrahydropapaverine HCl</b> |                                  | <table border="1"> <thead> <tr> <th colspan="7">Average Response</th> </tr> <tr> <th>Dose</th> <th>Green Signal</th> <th>Actual Pct Green Cells</th> <th>Normalized Pct Green Cells</th> <th>Red Signal</th> <th>Actual Pct Red Cells</th> <th>Normalized Pct Red Cells</th> </tr> </thead> <tbody> <tr> <td>0.1 uM</td> <td>95.97</td> <td>0.85</td> <td>47.05</td> <td>80.07</td> <td>0.03</td> <td>-40.01</td> </tr> <tr> <td>1 uM</td> <td>92.81</td> <td>0.83</td> <td>67.58</td> <td>71.29</td> <td>0.01</td> <td>-51.70</td> </tr> <tr> <td>10 uM</td> <td>87.53</td> <td>0.81</td> <td>490.62</td> <td>73.35</td> <td>0.02</td> <td>-51.07</td> </tr> </tbody> </table> | Average Response |                        |                            |            |                      |                          |  | Dose | Green Signal | Actual Pct Green Cells | Normalized Pct Green Cells | Red Signal | Actual Pct Red Cells | Normalized Pct Red Cells | 0.1 uM | 95.97 | 0.85 | 47.05 | 80.07 | 0.03 | -40.01 | 1 uM | 92.81 | 0.83 | 67.58 | 71.29 | 0.01 | -51.70 | 10 uM | 87.53 | 0.81 | 490.62 | 73.35 | 0.02 | -51.07 |
|                                 |                                  | Average Response                                                                                                                                                                                                                                                                                                                                                                                                                                                                                                                                                                                                                                                                |                  |                        |                            |            |                      |                          |  |      |              |                        |                            |            |                      |                          |        |       |      |       |       |      |        |      |       |      |       |       |      |        |       |       |      |        |       |      |        |
|                                 |                                  | Dose                                                                                                                                                                                                                                                                                                                                                                                                                                                                                                                                                                                                                                                                            | Green Signal     | Actual Pct Green Cells | Normalized Pct Green Cells | Red Signal | Actual Pct Red Cells | Normalized Pct Red Cells |  |      |              |                        |                            |            |                      |                          |        |       |      |       |       |      |        |      |       |      |       |       |      |        |       |       |      |        |       |      |        |
|                                 |                                  | 0.1 uM                                                                                                                                                                                                                                                                                                                                                                                                                                                                                                                                                                                                                                                                          | 95.97            | 0.85                   | 47.05                      | 80.07      | 0.03                 | -40.01                   |  |      |              |                        |                            |            |                      |                          |        |       |      |       |       |      |        |      |       |      |       |       |      |        |       |       |      |        |       |      |        |
| 1 uM                            | 92.81                            | 0.83                                                                                                                                                                                                                                                                                                                                                                                                                                                                                                                                                                                                                                                                            | 67.58            | 71.29                  | 0.01                       | -51.70     |                      |                          |  |      |              |                        |                            |            |                      |                          |        |       |      |       |       |      |        |      |       |      |       |       |      |        |       |       |      |        |       |      |        |
| 10 uM                           | 87.53                            | 0.81                                                                                                                                                                                                                                                                                                                                                                                                                                                                                                                                                                                                                                                                            | 490.62           | 73.35                  | 0.02                       | -51.07     |                      |                          |  |      |              |                        |                            |            |                      |                          |        |       |      |       |       |      |        |      |       |      |       |       |      |        |       |       |      |        |       |      |        |

| Compound         | Normalized Values (A and B Sets) | Responses                                                                                                                                                                                                                                                                                                                                                                                                                                                                                                                                                                                                                                                                          |                  |                        |                            |            |                      |                          |  |      |              |                        |                            |            |                      |                          |        |       |      |        |       |      |        |      |        |      |        |       |      |        |       |       |      |       |        |      |        |
|------------------|----------------------------------|------------------------------------------------------------------------------------------------------------------------------------------------------------------------------------------------------------------------------------------------------------------------------------------------------------------------------------------------------------------------------------------------------------------------------------------------------------------------------------------------------------------------------------------------------------------------------------------------------------------------------------------------------------------------------------|------------------|------------------------|----------------------------|------------|----------------------|--------------------------|--|------|--------------|------------------------|----------------------------|------------|----------------------|--------------------------|--------|-------|------|--------|-------|------|--------|------|--------|------|--------|-------|------|--------|-------|-------|------|-------|--------|------|--------|
| <b>TG100-115</b> |                                  | <table border="1"> <thead> <tr> <th colspan="7">Average Response</th> </tr> <tr> <th>Dose</th> <th>Green Signal</th> <th>Actual Pct Green Cells</th> <th>Normalized Pct Green Cells</th> <th>Red Signal</th> <th>Actual Pct Red Cells</th> <th>Normalized Pct Red Cells</th> </tr> </thead> <tbody> <tr> <td>0.1 uM</td> <td>91.46</td> <td>0.80</td> <td>-10.81</td> <td>95.43</td> <td>0.06</td> <td>-46.02</td> </tr> <tr> <td>1 uM</td> <td>102.19</td> <td>0.88</td> <td>103.76</td> <td>73.55</td> <td>0.02</td> <td>-49.79</td> </tr> <tr> <td>10 uM</td> <td>86.95</td> <td>0.77</td> <td>35.59</td> <td>106.01</td> <td>0.07</td> <td>-26.77</td> </tr> </tbody> </table> | Average Response |                        |                            |            |                      |                          |  | Dose | Green Signal | Actual Pct Green Cells | Normalized Pct Green Cells | Red Signal | Actual Pct Red Cells | Normalized Pct Red Cells | 0.1 uM | 91.46 | 0.80 | -10.81 | 95.43 | 0.06 | -46.02 | 1 uM | 102.19 | 0.88 | 103.76 | 73.55 | 0.02 | -49.79 | 10 uM | 86.95 | 0.77 | 35.59 | 106.01 | 0.07 | -26.77 |
|                  |                                  | Average Response                                                                                                                                                                                                                                                                                                                                                                                                                                                                                                                                                                                                                                                                   |                  |                        |                            |            |                      |                          |  |      |              |                        |                            |            |                      |                          |        |       |      |        |       |      |        |      |        |      |        |       |      |        |       |       |      |       |        |      |        |
|                  |                                  | Dose                                                                                                                                                                                                                                                                                                                                                                                                                                                                                                                                                                                                                                                                               | Green Signal     | Actual Pct Green Cells | Normalized Pct Green Cells | Red Signal | Actual Pct Red Cells | Normalized Pct Red Cells |  |      |              |                        |                            |            |                      |                          |        |       |      |        |       |      |        |      |        |      |        |       |      |        |       |       |      |       |        |      |        |
|                  |                                  | 0.1 uM                                                                                                                                                                                                                                                                                                                                                                                                                                                                                                                                                                                                                                                                             | 91.46            | 0.80                   | -10.81                     | 95.43      | 0.06                 | -46.02                   |  |      |              |                        |                            |            |                      |                          |        |       |      |        |       |      |        |      |        |      |        |       |      |        |       |       |      |       |        |      |        |
| 1 uM             | 102.19                           | 0.88                                                                                                                                                                                                                                                                                                                                                                                                                                                                                                                                                                                                                                                                               | 103.76           | 73.55                  | 0.02                       | -49.79     |                      |                          |  |      |              |                        |                            |            |                      |                          |        |       |      |        |       |      |        |      |        |      |        |       |      |        |       |       |      |       |        |      |        |
| 10 uM            | 86.95                            | 0.77                                                                                                                                                                                                                                                                                                                                                                                                                                                                                                                                                                                                                                                                               | 35.59            | 106.01                 | 0.07                       | -26.77     |                      |                          |  |      |              |                        |                            |            |                      |                          |        |       |      |        |       |      |        |      |        |      |        |       |      |        |       |       |      |       |        |      |        |

| Compound        | Normalized Values (A and B Sets) | Responses                                                                                                                                                                                                                                                                                                                                                                                                                                                                                                                                                                                                                                                                        |                  |                        |                            |            |                      |                          |  |      |              |                        |                            |            |                      |                          |        |       |      |        |       |      |        |      |       |      |       |       |      |        |       |       |      |        |       |      |        |
|-----------------|----------------------------------|----------------------------------------------------------------------------------------------------------------------------------------------------------------------------------------------------------------------------------------------------------------------------------------------------------------------------------------------------------------------------------------------------------------------------------------------------------------------------------------------------------------------------------------------------------------------------------------------------------------------------------------------------------------------------------|------------------|------------------------|----------------------------|------------|----------------------|--------------------------|--|------|--------------|------------------------|----------------------------|------------|----------------------|--------------------------|--------|-------|------|--------|-------|------|--------|------|-------|------|-------|-------|------|--------|-------|-------|------|--------|-------|------|--------|
| <b>TG100713</b> |                                  | <table border="1"> <thead> <tr> <th colspan="7">Average Response</th> </tr> <tr> <th>Dose</th> <th>Green Signal</th> <th>Actual Pct Green Cells</th> <th>Normalized Pct Green Cells</th> <th>Red Signal</th> <th>Actual Pct Red Cells</th> <th>Normalized Pct Red Cells</th> </tr> </thead> <tbody> <tr> <td>0.1 uM</td> <td>81.57</td> <td>0.80</td> <td>222.68</td> <td>69.45</td> <td>0.01</td> <td>-56.12</td> </tr> <tr> <td>1 uM</td> <td>89.36</td> <td>0.82</td> <td>70.73</td> <td>72.26</td> <td>0.03</td> <td>-51.90</td> </tr> <tr> <td>10 uM</td> <td>90.02</td> <td>0.87</td> <td>108.64</td> <td>87.03</td> <td>0.05</td> <td>-38.15</td> </tr> </tbody> </table> | Average Response |                        |                            |            |                      |                          |  | Dose | Green Signal | Actual Pct Green Cells | Normalized Pct Green Cells | Red Signal | Actual Pct Red Cells | Normalized Pct Red Cells | 0.1 uM | 81.57 | 0.80 | 222.68 | 69.45 | 0.01 | -56.12 | 1 uM | 89.36 | 0.82 | 70.73 | 72.26 | 0.03 | -51.90 | 10 uM | 90.02 | 0.87 | 108.64 | 87.03 | 0.05 | -38.15 |
|                 |                                  | Average Response                                                                                                                                                                                                                                                                                                                                                                                                                                                                                                                                                                                                                                                                 |                  |                        |                            |            |                      |                          |  |      |              |                        |                            |            |                      |                          |        |       |      |        |       |      |        |      |       |      |       |       |      |        |       |       |      |        |       |      |        |
|                 |                                  | Dose                                                                                                                                                                                                                                                                                                                                                                                                                                                                                                                                                                                                                                                                             | Green Signal     | Actual Pct Green Cells | Normalized Pct Green Cells | Red Signal | Actual Pct Red Cells | Normalized Pct Red Cells |  |      |              |                        |                            |            |                      |                          |        |       |      |        |       |      |        |      |       |      |       |       |      |        |       |       |      |        |       |      |        |
|                 |                                  | 0.1 uM                                                                                                                                                                                                                                                                                                                                                                                                                                                                                                                                                                                                                                                                           | 81.57            | 0.80                   | 222.68                     | 69.45      | 0.01                 | -56.12                   |  |      |              |                        |                            |            |                      |                          |        |       |      |        |       |      |        |      |       |      |       |       |      |        |       |       |      |        |       |      |        |
| 1 uM            | 89.36                            | 0.82                                                                                                                                                                                                                                                                                                                                                                                                                                                                                                                                                                                                                                                                             | 70.73            | 72.26                  | 0.03                       | -51.90     |                      |                          |  |      |              |                        |                            |            |                      |                          |        |       |      |        |       |      |        |      |       |      |       |       |      |        |       |       |      |        |       |      |        |
| 10 uM           | 90.02                            | 0.87                                                                                                                                                                                                                                                                                                                                                                                                                                                                                                                                                                                                                                                                             | 108.64           | 87.03                  | 0.05                       | -38.15     |                      |                          |  |      |              |                        |                            |            |                      |                          |        |       |      |        |       |      |        |      |       |      |       |       |      |        |       |       |      |        |       |      |        |

| Compound        | Normalized Values (A and B Sets) | Responses                                                                                                                                                                                                                                                                                                                                                                                                                                                                                                                                                                                                                                                                        |                  |                        |                            |            |                      |                          |  |      |              |                        |                            |            |                      |                          |        |       |      |       |       |      |        |      |        |      |       |       |      |        |       |       |      |        |       |      |        |
|-----------------|----------------------------------|----------------------------------------------------------------------------------------------------------------------------------------------------------------------------------------------------------------------------------------------------------------------------------------------------------------------------------------------------------------------------------------------------------------------------------------------------------------------------------------------------------------------------------------------------------------------------------------------------------------------------------------------------------------------------------|------------------|------------------------|----------------------------|------------|----------------------|--------------------------|--|------|--------------|------------------------|----------------------------|------------|----------------------|--------------------------|--------|-------|------|-------|-------|------|--------|------|--------|------|-------|-------|------|--------|-------|-------|------|--------|-------|------|--------|
| <b>TG101209</b> |                                  | <table border="1"> <thead> <tr> <th colspan="7">Average Response</th> </tr> <tr> <th>Dose</th> <th>Green Signal</th> <th>Actual Pct Green Cells</th> <th>Normalized Pct Green Cells</th> <th>Red Signal</th> <th>Actual Pct Red Cells</th> <th>Normalized Pct Red Cells</th> </tr> </thead> <tbody> <tr> <td>0.1 uM</td> <td>91.43</td> <td>0.86</td> <td>61.73</td> <td>90.97</td> <td>0.06</td> <td>-25.41</td> </tr> <tr> <td>1 uM</td> <td>100.80</td> <td>0.88</td> <td>83.69</td> <td>76.25</td> <td>0.03</td> <td>-44.47</td> </tr> <tr> <td>10 uM</td> <td>77.94</td> <td>0.68</td> <td>156.96</td> <td>89.18</td> <td>0.05</td> <td>-33.31</td> </tr> </tbody> </table> | Average Response |                        |                            |            |                      |                          |  | Dose | Green Signal | Actual Pct Green Cells | Normalized Pct Green Cells | Red Signal | Actual Pct Red Cells | Normalized Pct Red Cells | 0.1 uM | 91.43 | 0.86 | 61.73 | 90.97 | 0.06 | -25.41 | 1 uM | 100.80 | 0.88 | 83.69 | 76.25 | 0.03 | -44.47 | 10 uM | 77.94 | 0.68 | 156.96 | 89.18 | 0.05 | -33.31 |
|                 |                                  | Average Response                                                                                                                                                                                                                                                                                                                                                                                                                                                                                                                                                                                                                                                                 |                  |                        |                            |            |                      |                          |  |      |              |                        |                            |            |                      |                          |        |       |      |       |       |      |        |      |        |      |       |       |      |        |       |       |      |        |       |      |        |
|                 |                                  | Dose                                                                                                                                                                                                                                                                                                                                                                                                                                                                                                                                                                                                                                                                             | Green Signal     | Actual Pct Green Cells | Normalized Pct Green Cells | Red Signal | Actual Pct Red Cells | Normalized Pct Red Cells |  |      |              |                        |                            |            |                      |                          |        |       |      |       |       |      |        |      |        |      |       |       |      |        |       |       |      |        |       |      |        |
|                 |                                  | 0.1 uM                                                                                                                                                                                                                                                                                                                                                                                                                                                                                                                                                                                                                                                                           | 91.43            | 0.86                   | 61.73                      | 90.97      | 0.06                 | -25.41                   |  |      |              |                        |                            |            |                      |                          |        |       |      |       |       |      |        |      |        |      |       |       |      |        |       |       |      |        |       |      |        |
| 1 uM            | 100.80                           | 0.88                                                                                                                                                                                                                                                                                                                                                                                                                                                                                                                                                                                                                                                                             | 83.69            | 76.25                  | 0.03                       | -44.47     |                      |                          |  |      |              |                        |                            |            |                      |                          |        |       |      |       |       |      |        |      |        |      |       |       |      |        |       |       |      |        |       |      |        |
| 10 uM           | 77.94                            | 0.68                                                                                                                                                                                                                                                                                                                                                                                                                                                                                                                                                                                                                                                                             | 156.96           | 89.18                  | 0.05                       | -33.31     |                      |                          |  |      |              |                        |                            |            |                      |                          |        |       |      |       |       |      |        |      |        |      |       |       |      |        |       |       |      |        |       |      |        |

| Compound                    | Normalized Values (A and B Sets) | Responses                                                                                                                                                                                                                                                                                                                                                                                                                                                                                                                                                    |                  |                        |                            |            |                      |                          |  |      |              |                        |                            |            |                      |                          |        |        |      |        |       |      |       |      |       |      |       |       |      |        |
|-----------------------------|----------------------------------|--------------------------------------------------------------------------------------------------------------------------------------------------------------------------------------------------------------------------------------------------------------------------------------------------------------------------------------------------------------------------------------------------------------------------------------------------------------------------------------------------------------------------------------------------------------|------------------|------------------------|----------------------------|------------|----------------------|--------------------------|--|------|--------------|------------------------|----------------------------|------------|----------------------|--------------------------|--------|--------|------|--------|-------|------|-------|------|-------|------|-------|-------|------|--------|
| <b>TG101348 (SAR302503)</b> |                                  | <table border="1"> <thead> <tr> <th colspan="7">Average Response</th> </tr> <tr> <th>Dose</th> <th>Green Signal</th> <th>Actual Pct Green Cells</th> <th>Normalized Pct Green Cells</th> <th>Red Signal</th> <th>Actual Pct Red Cells</th> <th>Normalized Pct Red Cells</th> </tr> </thead> <tbody> <tr> <td>0.1 uM</td> <td>108.69</td> <td>0.94</td> <td>148.06</td> <td>98.34</td> <td>0.11</td> <td>-5.08</td> </tr> <tr> <td>1 uM</td> <td>91.47</td> <td>0.77</td> <td>45.00</td> <td>88.89</td> <td>0.07</td> <td>-26.24</td> </tr> </tbody> </table> | Average Response |                        |                            |            |                      |                          |  | Dose | Green Signal | Actual Pct Green Cells | Normalized Pct Green Cells | Red Signal | Actual Pct Red Cells | Normalized Pct Red Cells | 0.1 uM | 108.69 | 0.94 | 148.06 | 98.34 | 0.11 | -5.08 | 1 uM | 91.47 | 0.77 | 45.00 | 88.89 | 0.07 | -26.24 |
|                             |                                  | Average Response                                                                                                                                                                                                                                                                                                                                                                                                                                                                                                                                             |                  |                        |                            |            |                      |                          |  |      |              |                        |                            |            |                      |                          |        |        |      |        |       |      |       |      |       |      |       |       |      |        |
|                             |                                  | Dose                                                                                                                                                                                                                                                                                                                                                                                                                                                                                                                                                         | Green Signal     | Actual Pct Green Cells | Normalized Pct Green Cells | Red Signal | Actual Pct Red Cells | Normalized Pct Red Cells |  |      |              |                        |                            |            |                      |                          |        |        |      |        |       |      |       |      |       |      |       |       |      |        |
| 0.1 uM                      | 108.69                           | 0.94                                                                                                                                                                                                                                                                                                                                                                                                                                                                                                                                                         | 148.06           | 98.34                  | 0.11                       | -5.08      |                      |                          |  |      |              |                        |                            |            |                      |                          |        |        |      |        |       |      |       |      |       |      |       |       |      |        |
| 1 uM                        | 91.47                            | 0.77                                                                                                                                                                                                                                                                                                                                                                                                                                                                                                                                                         | 45.00            | 88.89                  | 0.07                       | -26.24     |                      |                          |  |      |              |                        |                            |            |                      |                          |        |        |      |        |       |      |       |      |       |      |       |       |      |        |

| Compound | Normalized Values (A and B Sets) | Responses |        |      |        |       |      |        |
|----------|----------------------------------|-----------|--------|------|--------|-------|------|--------|
|          |                                  | 10 uM     | 106.32 | 0.96 | 467.05 | 87.84 | 0.04 | -40.04 |

| Compound         | Normalized Values (A and B Sets) | Responses               |              |                        |                            |            |                      |                          |
|------------------|----------------------------------|-------------------------|--------------|------------------------|----------------------------|------------|----------------------|--------------------------|
| <b>Thiamet G</b> |                                  | <b>Average Response</b> |              |                        |                            |            |                      |                          |
|                  |                                  | Dose                    | Green Signal | Actual Pct Green Cells | Normalized Pct Green Cells | Red Signal | Actual Pct Red Cells | Normalized Pct Red Cells |
|                  |                                  | 0.1 uM                  | 74.36        | 0.65                   | 116.92                     | 83.05      | 0.03                 | -52.91                   |
|                  |                                  | 1 uM                    | 93.84        | 0.85                   | 20.18                      | 82.81      | 0.05                 | -20.94                   |
| 10 uM            | 91.27                            | 0.87                    | 51.35        | 69.32                  | 0.03                       | -37.54     |                      |                          |

| Compound           | Normalized Values (A and B Sets) | Responses               |              |                        |                            |            |                      |                          |
|--------------------|----------------------------------|-------------------------|--------------|------------------------|----------------------------|------------|----------------------|--------------------------|
| <b>Thiazovivin</b> |                                  | <b>Average Response</b> |              |                        |                            |            |                      |                          |
|                    |                                  | Dose                    | Green Signal | Actual Pct Green Cells | Normalized Pct Green Cells | Red Signal | Actual Pct Red Cells | Normalized Pct Red Cells |
|                    |                                  | 0.1 uM                  | 108.21       | 0.94                   | 143.59                     | 97.86      | 0.09                 | -17.28                   |
|                    |                                  | 1 uM                    | 112.48       | 0.95                   | 179.38                     | 76.11      | 0.04                 | -30.96                   |
| 10 uM              | 122.76                           | 0.97                    | 145.55       | 102.86                 | 0.17                       | 21.14      |                      |                          |

| Compound            | Normalized Values (A and B Sets) | Responses               |              |                        |                            |            |                      |                          |
|---------------------|----------------------------------|-------------------------|--------------|------------------------|----------------------------|------------|----------------------|--------------------------|
| <b>Thiostrepton</b> |                                  | <b>Average Response</b> |              |                        |                            |            |                      |                          |
|                     |                                  | Dose                    | Green Signal | Actual Pct Green Cells | Normalized Pct Green Cells | Red Signal | Actual Pct Red Cells | Normalized Pct Red Cells |
|                     |                                  | 0.1 uM                  | 99.42        | 0.88                   | 73.54                      | 92.48      | 0.10                 | -9.88                    |
|                     |                                  | 1 uM                    | 102.44       | 0.88                   | 114.18                     | 82.12      | 0.05                 | -44.46                   |
| 10 uM               | 117.45                           | 0.87                    | 96.15        | 103.89                 | 0.13                       | 9.70       |                      |                          |

| Compound                 | Normalized Values (A and B Sets) | Responses               |              |                        |                            |            |                      |                          |
|--------------------------|----------------------------------|-------------------------|--------------|------------------------|----------------------------|------------|----------------------|--------------------------|
| <b>Tianeptine sodium</b> |                                  | <b>Average Response</b> |              |                        |                            |            |                      |                          |
|                          |                                  | Dose                    | Green Signal | Actual Pct Green Cells | Normalized Pct Green Cells | Red Signal | Actual Pct Red Cells | Normalized Pct Red Cells |
|                          |                                  | 0.1 uM                  | 104.94       | 0.90                   | 104.13                     | 89.08      | 0.05                 | -44.49                   |
|                          |                                  | 1 uM                    | 80.76        | 0.64                   | 256.57                     | 102.93     | 0.09                 | -17.76                   |
| 10 uM                    | 97.20                            | 0.82                    | 67.00        | 99.36                  | 0.06                       | -28.80     |                      |                          |

| Compound          | Normalized Values (A and B Sets) | Responses               |              |                        |  |            |                      |
|-------------------|----------------------------------|-------------------------|--------------|------------------------|--|------------|----------------------|
| <b>Ticagrelor</b> |                                  | <b>Average Response</b> |              |                        |  |            |                      |
|                   |                                  | Dose                    | Green Signal | Actual Pct Green Cells |  | Red Signal | Actual Pct Red Cells |



Compound

Normalized Values (A and B Sets)

Responses

| Tilmicosin | Percent Green Cells (AB) |      | Percent Red Cells (AB) |        | Average Response |              |                        |                            |            |                      |                          |       |       |
|------------|--------------------------|------|------------------------|--------|------------------|--------------|------------------------|----------------------------|------------|----------------------|--------------------------|-------|-------|
|            | Percent Response         |      | Percent Response       |        | Dose             | Green Signal | Actual Pct Green Cells | Normalized Pct Green Cells | Red Signal | Actual Pct Red Cells | Normalized Pct Red Cells |       |       |
|            | concentration            |      | concentration          |        | 0.1 uM           | 1 uM         | 10 uM                  | 0.1 uM                     | 1 uM       | 10 uM                | 0.1 uM                   | 1 uM  | 10 uM |
|            | 0.1 uM                   | 1 uM | 10 uM                  | 0.1 uM | 1 uM             | 10 uM        | 0.1 uM                 | 1 uM                       | 10 uM      | 0.1 uM               | 1 uM                     | 10 uM |       |
|            | 35                       | 35   | 100                    | 100    |                  |              |                        |                            |            |                      |                          |       |       |
|            | 35                       | 35   | 100                    | 100    | 0.1 uM           | 82.94        | 0.75                   | 361.83                     | 78.35      | 0.04                 | -44.02                   |       |       |
|            | 35                       | 35   | 100                    | 100    | 1 uM             | 98.73        | 0.81                   | 67.43                      | 99.00      | 0.12                 | -5.79                    |       |       |
|            | 35                       | 35   | 100                    | 100    | 10 uM            | 103.54       | 0.91                   | 144.66                     | 77.11      | 0.03                 | -48.81                   |       |       |

Compound

Normalized Values (A and B Sets)

Responses

| Tiopronin | Percent Green Cells (AB) |      | Percent Red Cells (AB) |        | Average Response |              |                        |                            |            |                      |                          |       |       |
|-----------|--------------------------|------|------------------------|--------|------------------|--------------|------------------------|----------------------------|------------|----------------------|--------------------------|-------|-------|
|           | Percent Response         |      | Percent Response       |        | Dose             | Green Signal | Actual Pct Green Cells | Normalized Pct Green Cells | Red Signal | Actual Pct Red Cells | Normalized Pct Red Cells |       |       |
|           | concentration            |      | concentration          |        | 0.1 uM           | 1 uM         | 10 uM                  | 0.1 uM                     | 1 uM       | 10 uM                | 0.1 uM                   | 1 uM  | 10 uM |
|           | 0.1 uM                   | 1 uM | 10 uM                  | 0.1 uM | 1 uM             | 10 uM        | 0.1 uM                 | 1 uM                       | 10 uM      | 0.1 uM               | 1 uM                     | 10 uM |       |
|           | 100                      | 100  | 100                    | 100    |                  |              |                        |                            |            |                      |                          |       |       |
|           | 100                      | 100  | 100                    | 100    | 0.1 uM           | 108.55       | 0.92                   | 121.97                     | 90.81      | 0.06                 | -39.83                   |       |       |
|           | 100                      | 100  | 100                    | 100    | 1 uM             | 104.53       | 0.87                   | 90.89                      | 101.48     | 0.08                 | -19.61                   |       |       |
|           | 100                      | 100  | 100                    | 100    | 10 uM            | 114.52       | 0.91                   | 117.33                     | 117.96     | 0.14                 | 1.78                     |       |       |

Compound

Normalized Values (A and B Sets)

Responses

| Tiotropium Bromide hydrate | Percent Green Cells (AB) |      | Percent Red Cells (AB) |        | Average Response |              |                        |                            |            |                      |                          |       |       |
|----------------------------|--------------------------|------|------------------------|--------|------------------|--------------|------------------------|----------------------------|------------|----------------------|--------------------------|-------|-------|
|                            | Percent Response         |      | Percent Response       |        | Dose             | Green Signal | Actual Pct Green Cells | Normalized Pct Green Cells | Red Signal | Actual Pct Red Cells | Normalized Pct Red Cells |       |       |
|                            | concentration            |      | concentration          |        | 0.1 uM           | 1 uM         | 10 uM                  | 0.1 uM                     | 1 uM       | 10 uM                | 0.1 uM                   | 1 uM  | 10 uM |
|                            | 0.1 uM                   | 1 uM | 10 uM                  | 0.1 uM | 1 uM             | 10 uM        | 0.1 uM                 | 1 uM                       | 10 uM      | 0.1 uM               | 1 uM                     | 10 uM |       |
|                            | 65                       | 85   | 100                    | 100    |                  |              |                        |                            |            |                      |                          |       |       |
|                            | 65                       | 85   | 100                    | 100    | 0.1 uM           | 96.47        | 0.87                   | 76.14                      | 76.98      | 0.04                 | -33.36                   |       |       |
|                            | 65                       | 85   | 100                    | 100    | 1 uM             | 95.82        | 0.84                   | 76.41                      | 94.43      | 0.06                 | -27.49                   |       |       |
|                            | 65                       | 85   | 100                    | 100    | 10 uM            | 101.91       | 0.90                   | 113.59                     | 95.82      | 0.09                 | -15.43                   |       |       |

Compound

Normalized Values (A and B Sets)

Responses

| Tioxolone | Percent Green Cells (AB) |      | Percent Red Cells (AB) |        | Average Response |              |                        |                            |            |                      |                          |       |       |
|-----------|--------------------------|------|------------------------|--------|------------------|--------------|------------------------|----------------------------|------------|----------------------|--------------------------|-------|-------|
|           | Percent Response         |      | Percent Response       |        | Dose             | Green Signal | Actual Pct Green Cells | Normalized Pct Green Cells | Red Signal | Actual Pct Red Cells | Normalized Pct Red Cells |       |       |
|           | concentration            |      | concentration          |        | 0.1 uM           | 1 uM         | 10 uM                  | 0.1 uM                     | 1 uM       | 10 uM                | 0.1 uM                   | 1 uM  | 10 uM |
|           | 0.1 uM                   | 1 uM | 10 uM                  | 0.1 uM | 1 uM             | 10 uM        | 0.1 uM                 | 1 uM                       | 10 uM      | 0.1 uM               | 1 uM                     | 10 uM |       |
|           | 35                       | 100  | 100                    | 100    |                  |              |                        |                            |            |                      |                          |       |       |
|           | 35                       | 100  | 100                    | 100    | 0.1 uM           | 103.25       | 0.90                   | 104.19                     | 80.42      | 0.04                 | -35.39                   |       |       |
|           | 35                       | 100  | 100                    | 100    | 1 uM             | 112.82       | 0.90                   | 104.81                     | 93.87      | 0.07                 | -22.51                   |       |       |
|           | 35                       | 100  | 100                    | 100    | 10 uM            | 95.04        | 0.89                   | 244.30                     | 85.74      | 0.04                 | -37.31                   |       |       |

Compound

Normalized Values (A and B Sets)

Responses

| Tipifarnib | Percent Green Cells (AB) |      | Percent Red Cells (AB) |        | Average Response |              |                        |                            |            |                      |                          |       |       |
|------------|--------------------------|------|------------------------|--------|------------------|--------------|------------------------|----------------------------|------------|----------------------|--------------------------|-------|-------|
|            | Percent Response         |      | Percent Response       |        | Dose             | Green Signal | Actual Pct Green Cells | Normalized Pct Green Cells | Red Signal | Actual Pct Red Cells | Normalized Pct Red Cells |       |       |
|            | concentration            |      | concentration          |        | 0.1 uM           | 1 uM         | 10 uM                  | 0.1 uM                     | 1 uM       | 10 uM                | 0.1 uM                   | 1 uM  | 10 uM |
|            | 0.1 uM                   | 1 uM | 10 uM                  | 0.1 uM | 1 uM             | 10 uM        | 0.1 uM                 | 1 uM                       | 10 uM      | 0.1 uM               | 1 uM                     | 10 uM |       |
|            | 70                       | 90   | 100                    | 50     |                  |              |                        |                            |            |                      |                          |       |       |
|            | 70                       | 90   | 100                    | 50     | 0.1 uM           | 98.97        | 0.89                   | 80.68                      | 108.62     | 0.13                 | 4.90                     |       |       |
|            | 70                       | 90   | 100                    | 50     | 1 uM             | 103.72       | 0.90                   | 91.42                      | 103.86     | 0.11                 | -7.75                    |       |       |
|            | 70                       | 90   | 100                    | 50     | 10 uM            | 99.42        | 0.85                   | 80.16                      | 97.50      | 0.05                 | -33.73                   |       |       |

| Compound                    | Normalized Values (A and B Sets) | Responses                                                                                                                                                                                                                                                                                                                                                                                                                                                                                                                                                                                                                                                                       |                  |                        |                            |            |                      |                          |  |      |              |                        |                            |            |                      |                          |        |       |      |       |       |      |        |      |        |      |       |       |      |       |       |        |      |       |        |      |       |
|-----------------------------|----------------------------------|---------------------------------------------------------------------------------------------------------------------------------------------------------------------------------------------------------------------------------------------------------------------------------------------------------------------------------------------------------------------------------------------------------------------------------------------------------------------------------------------------------------------------------------------------------------------------------------------------------------------------------------------------------------------------------|------------------|------------------------|----------------------------|------------|----------------------|--------------------------|--|------|--------------|------------------------|----------------------------|------------|----------------------|--------------------------|--------|-------|------|-------|-------|------|--------|------|--------|------|-------|-------|------|-------|-------|--------|------|-------|--------|------|-------|
| <b>Tivantinib (ARQ 197)</b> |                                  | <table border="1"> <thead> <tr> <th colspan="7">Average Response</th> </tr> <tr> <th>Dose</th> <th>Green Signal</th> <th>Actual Pct Green Cells</th> <th>Normalized Pct Green Cells</th> <th>Red Signal</th> <th>Actual Pct Red Cells</th> <th>Normalized Pct Red Cells</th> </tr> </thead> <tbody> <tr> <td>0.1 uM</td> <td>89.16</td> <td>0.83</td> <td>36.80</td> <td>75.37</td> <td>0.02</td> <td>-44.01</td> </tr> <tr> <td>1 uM</td> <td>105.42</td> <td>0.81</td> <td>60.59</td> <td>94.71</td> <td>0.12</td> <td>-1.82</td> </tr> <tr> <td>10 uM</td> <td>117.25</td> <td>0.92</td> <td>80.24</td> <td>105.65</td> <td>0.15</td> <td>15.54</td> </tr> </tbody> </table> | Average Response |                        |                            |            |                      |                          |  | Dose | Green Signal | Actual Pct Green Cells | Normalized Pct Green Cells | Red Signal | Actual Pct Red Cells | Normalized Pct Red Cells | 0.1 uM | 89.16 | 0.83 | 36.80 | 75.37 | 0.02 | -44.01 | 1 uM | 105.42 | 0.81 | 60.59 | 94.71 | 0.12 | -1.82 | 10 uM | 117.25 | 0.92 | 80.24 | 105.65 | 0.15 | 15.54 |
|                             |                                  | Average Response                                                                                                                                                                                                                                                                                                                                                                                                                                                                                                                                                                                                                                                                |                  |                        |                            |            |                      |                          |  |      |              |                        |                            |            |                      |                          |        |       |      |       |       |      |        |      |        |      |       |       |      |       |       |        |      |       |        |      |       |
|                             |                                  | Dose                                                                                                                                                                                                                                                                                                                                                                                                                                                                                                                                                                                                                                                                            | Green Signal     | Actual Pct Green Cells | Normalized Pct Green Cells | Red Signal | Actual Pct Red Cells | Normalized Pct Red Cells |  |      |              |                        |                            |            |                      |                          |        |       |      |       |       |      |        |      |        |      |       |       |      |       |       |        |      |       |        |      |       |
|                             |                                  | 0.1 uM                                                                                                                                                                                                                                                                                                                                                                                                                                                                                                                                                                                                                                                                          | 89.16            | 0.83                   | 36.80                      | 75.37      | 0.02                 | -44.01                   |  |      |              |                        |                            |            |                      |                          |        |       |      |       |       |      |        |      |        |      |       |       |      |       |       |        |      |       |        |      |       |
| 1 uM                        | 105.42                           | 0.81                                                                                                                                                                                                                                                                                                                                                                                                                                                                                                                                                                                                                                                                            | 60.59            | 94.71                  | 0.12                       | -1.82      |                      |                          |  |      |              |                        |                            |            |                      |                          |        |       |      |       |       |      |        |      |        |      |       |       |      |       |       |        |      |       |        |      |       |
| 10 uM                       | 117.25                           | 0.92                                                                                                                                                                                                                                                                                                                                                                                                                                                                                                                                                                                                                                                                            | 80.24            | 105.65                 | 0.15                       | 15.54      |                      |                          |  |      |              |                        |                            |            |                      |                          |        |       |      |       |       |      |        |      |        |      |       |       |      |       |       |        |      |       |        |      |       |

| Compound                  | Normalized Values (A and B Sets) | Responses                                                                                                                                                                                                                                                                                                                                                                                                                                                                                                                                                                                                                                                                        |                  |                        |                            |            |                      |                          |  |      |              |                        |                            |            |                      |                          |        |       |      |       |       |      |        |      |       |      |        |       |      |        |       |        |      |       |        |      |       |
|---------------------------|----------------------------------|----------------------------------------------------------------------------------------------------------------------------------------------------------------------------------------------------------------------------------------------------------------------------------------------------------------------------------------------------------------------------------------------------------------------------------------------------------------------------------------------------------------------------------------------------------------------------------------------------------------------------------------------------------------------------------|------------------|------------------------|----------------------------|------------|----------------------|--------------------------|--|------|--------------|------------------------|----------------------------|------------|----------------------|--------------------------|--------|-------|------|-------|-------|------|--------|------|-------|------|--------|-------|------|--------|-------|--------|------|-------|--------|------|-------|
| <b>Tivozanib (AV-951)</b> |                                  | <table border="1"> <thead> <tr> <th colspan="7">Average Response</th> </tr> <tr> <th>Dose</th> <th>Green Signal</th> <th>Actual Pct Green Cells</th> <th>Normalized Pct Green Cells</th> <th>Red Signal</th> <th>Actual Pct Red Cells</th> <th>Normalized Pct Red Cells</th> </tr> </thead> <tbody> <tr> <td>0.1 uM</td> <td>92.86</td> <td>0.86</td> <td>69.97</td> <td>73.62</td> <td>0.02</td> <td>-64.70</td> </tr> <tr> <td>1 uM</td> <td>87.37</td> <td>0.81</td> <td>401.72</td> <td>88.70</td> <td>0.08</td> <td>-20.33</td> </tr> <tr> <td>10 uM</td> <td>100.20</td> <td>0.90</td> <td>90.59</td> <td>106.15</td> <td>0.16</td> <td>22.84</td> </tr> </tbody> </table> | Average Response |                        |                            |            |                      |                          |  | Dose | Green Signal | Actual Pct Green Cells | Normalized Pct Green Cells | Red Signal | Actual Pct Red Cells | Normalized Pct Red Cells | 0.1 uM | 92.86 | 0.86 | 69.97 | 73.62 | 0.02 | -64.70 | 1 uM | 87.37 | 0.81 | 401.72 | 88.70 | 0.08 | -20.33 | 10 uM | 100.20 | 0.90 | 90.59 | 106.15 | 0.16 | 22.84 |
|                           |                                  | Average Response                                                                                                                                                                                                                                                                                                                                                                                                                                                                                                                                                                                                                                                                 |                  |                        |                            |            |                      |                          |  |      |              |                        |                            |            |                      |                          |        |       |      |       |       |      |        |      |       |      |        |       |      |        |       |        |      |       |        |      |       |
|                           |                                  | Dose                                                                                                                                                                                                                                                                                                                                                                                                                                                                                                                                                                                                                                                                             | Green Signal     | Actual Pct Green Cells | Normalized Pct Green Cells | Red Signal | Actual Pct Red Cells | Normalized Pct Red Cells |  |      |              |                        |                            |            |                      |                          |        |       |      |       |       |      |        |      |       |      |        |       |      |        |       |        |      |       |        |      |       |
|                           |                                  | 0.1 uM                                                                                                                                                                                                                                                                                                                                                                                                                                                                                                                                                                                                                                                                           | 92.86            | 0.86                   | 69.97                      | 73.62      | 0.02                 | -64.70                   |  |      |              |                        |                            |            |                      |                          |        |       |      |       |       |      |        |      |       |      |        |       |      |        |       |        |      |       |        |      |       |
| 1 uM                      | 87.37                            | 0.81                                                                                                                                                                                                                                                                                                                                                                                                                                                                                                                                                                                                                                                                             | 401.72           | 88.70                  | 0.08                       | -20.33     |                      |                          |  |      |              |                        |                            |            |                      |                          |        |       |      |       |       |      |        |      |       |      |        |       |      |        |       |        |      |       |        |      |       |
| 10 uM                     | 100.20                           | 0.90                                                                                                                                                                                                                                                                                                                                                                                                                                                                                                                                                                                                                                                                             | 90.59            | 106.15                 | 0.16                       | 22.84      |                      |                          |  |      |              |                        |                            |            |                      |                          |        |       |      |       |       |      |        |      |       |      |        |       |      |        |       |        |      |       |        |      |       |

| Compound                               | Normalized Values (A and B Sets) | Responses                                                                                                                                                                                                                                                                                                                                                                                                                                                                                                                                                                                                                                                                      |                  |                        |                            |            |                      |                          |  |      |              |                        |                            |            |                      |                          |        |       |      |       |        |      |       |      |       |      |       |       |      |        |       |       |      |       |       |      |        |
|----------------------------------------|----------------------------------|--------------------------------------------------------------------------------------------------------------------------------------------------------------------------------------------------------------------------------------------------------------------------------------------------------------------------------------------------------------------------------------------------------------------------------------------------------------------------------------------------------------------------------------------------------------------------------------------------------------------------------------------------------------------------------|------------------|------------------------|----------------------------|------------|----------------------|--------------------------|--|------|--------------|------------------------|----------------------------|------------|----------------------|--------------------------|--------|-------|------|-------|--------|------|-------|------|-------|------|-------|-------|------|--------|-------|-------|------|-------|-------|------|--------|
| <b>Tofacitinib (CP-690550) Citrate</b> |                                  | <table border="1"> <thead> <tr> <th colspan="7">Average Response</th> </tr> <tr> <th>Dose</th> <th>Green Signal</th> <th>Actual Pct Green Cells</th> <th>Normalized Pct Green Cells</th> <th>Red Signal</th> <th>Actual Pct Red Cells</th> <th>Normalized Pct Red Cells</th> </tr> </thead> <tbody> <tr> <td>0.1 uM</td> <td>98.62</td> <td>0.88</td> <td>51.62</td> <td>104.82</td> <td>0.16</td> <td>16.61</td> </tr> <tr> <td>1 uM</td> <td>96.68</td> <td>0.81</td> <td>64.40</td> <td>78.60</td> <td>0.05</td> <td>-43.16</td> </tr> <tr> <td>10 uM</td> <td>95.32</td> <td>0.79</td> <td>31.32</td> <td>95.15</td> <td>0.09</td> <td>-14.06</td> </tr> </tbody> </table> | Average Response |                        |                            |            |                      |                          |  | Dose | Green Signal | Actual Pct Green Cells | Normalized Pct Green Cells | Red Signal | Actual Pct Red Cells | Normalized Pct Red Cells | 0.1 uM | 98.62 | 0.88 | 51.62 | 104.82 | 0.16 | 16.61 | 1 uM | 96.68 | 0.81 | 64.40 | 78.60 | 0.05 | -43.16 | 10 uM | 95.32 | 0.79 | 31.32 | 95.15 | 0.09 | -14.06 |
|                                        |                                  | Average Response                                                                                                                                                                                                                                                                                                                                                                                                                                                                                                                                                                                                                                                               |                  |                        |                            |            |                      |                          |  |      |              |                        |                            |            |                      |                          |        |       |      |       |        |      |       |      |       |      |       |       |      |        |       |       |      |       |       |      |        |
|                                        |                                  | Dose                                                                                                                                                                                                                                                                                                                                                                                                                                                                                                                                                                                                                                                                           | Green Signal     | Actual Pct Green Cells | Normalized Pct Green Cells | Red Signal | Actual Pct Red Cells | Normalized Pct Red Cells |  |      |              |                        |                            |            |                      |                          |        |       |      |       |        |      |       |      |       |      |       |       |      |        |       |       |      |       |       |      |        |
|                                        |                                  | 0.1 uM                                                                                                                                                                                                                                                                                                                                                                                                                                                                                                                                                                                                                                                                         | 98.62            | 0.88                   | 51.62                      | 104.82     | 0.16                 | 16.61                    |  |      |              |                        |                            |            |                      |                          |        |       |      |       |        |      |       |      |       |      |       |       |      |        |       |       |      |       |       |      |        |
| 1 uM                                   | 96.68                            | 0.81                                                                                                                                                                                                                                                                                                                                                                                                                                                                                                                                                                                                                                                                           | 64.40            | 78.60                  | 0.05                       | -43.16     |                      |                          |  |      |              |                        |                            |            |                      |                          |        |       |      |       |        |      |       |      |       |      |       |       |      |        |       |       |      |       |       |      |        |
| 10 uM                                  | 95.32                            | 0.79                                                                                                                                                                                                                                                                                                                                                                                                                                                                                                                                                                                                                                                                           | 31.32            | 95.15                  | 0.09                       | -14.06     |                      |                          |  |      |              |                        |                            |            |                      |                          |        |       |      |       |        |      |       |      |       |      |       |       |      |        |       |       |      |       |       |      |        |

| Compound                                    | Normalized Values (A and B Sets) | Responses                                                                                                                                                                                                                                                                                                                                                                                                                                                                                                                                                                                                                                                                         |                  |                        |                            |            |                      |                          |  |      |              |                        |                            |            |                      |                          |        |        |      |        |       |      |       |      |       |      |       |       |      |        |       |        |      |        |       |      |        |
|---------------------------------------------|----------------------------------|-----------------------------------------------------------------------------------------------------------------------------------------------------------------------------------------------------------------------------------------------------------------------------------------------------------------------------------------------------------------------------------------------------------------------------------------------------------------------------------------------------------------------------------------------------------------------------------------------------------------------------------------------------------------------------------|------------------|------------------------|----------------------------|------------|----------------------|--------------------------|--|------|--------------|------------------------|----------------------------|------------|----------------------|--------------------------|--------|--------|------|--------|-------|------|-------|------|-------|------|-------|-------|------|--------|-------|--------|------|--------|-------|------|--------|
| <b>Tofacitinib (CP-690550, Tasocitinib)</b> |                                  | <table border="1"> <thead> <tr> <th colspan="7">Average Response</th> </tr> <tr> <th>Dose</th> <th>Green Signal</th> <th>Actual Pct Green Cells</th> <th>Normalized Pct Green Cells</th> <th>Red Signal</th> <th>Actual Pct Red Cells</th> <th>Normalized Pct Red Cells</th> </tr> </thead> <tbody> <tr> <td>0.1 uM</td> <td>101.44</td> <td>0.92</td> <td>133.08</td> <td>95.75</td> <td>0.10</td> <td>-6.01</td> </tr> <tr> <td>1 uM</td> <td>94.11</td> <td>0.79</td> <td>45.28</td> <td>95.96</td> <td>0.08</td> <td>-18.07</td> </tr> <tr> <td>10 uM</td> <td>114.12</td> <td>0.94</td> <td>434.49</td> <td>88.76</td> <td>0.05</td> <td>-33.66</td> </tr> </tbody> </table> | Average Response |                        |                            |            |                      |                          |  | Dose | Green Signal | Actual Pct Green Cells | Normalized Pct Green Cells | Red Signal | Actual Pct Red Cells | Normalized Pct Red Cells | 0.1 uM | 101.44 | 0.92 | 133.08 | 95.75 | 0.10 | -6.01 | 1 uM | 94.11 | 0.79 | 45.28 | 95.96 | 0.08 | -18.07 | 10 uM | 114.12 | 0.94 | 434.49 | 88.76 | 0.05 | -33.66 |
|                                             |                                  | Average Response                                                                                                                                                                                                                                                                                                                                                                                                                                                                                                                                                                                                                                                                  |                  |                        |                            |            |                      |                          |  |      |              |                        |                            |            |                      |                          |        |        |      |        |       |      |       |      |       |      |       |       |      |        |       |        |      |        |       |      |        |
|                                             |                                  | Dose                                                                                                                                                                                                                                                                                                                                                                                                                                                                                                                                                                                                                                                                              | Green Signal     | Actual Pct Green Cells | Normalized Pct Green Cells | Red Signal | Actual Pct Red Cells | Normalized Pct Red Cells |  |      |              |                        |                            |            |                      |                          |        |        |      |        |       |      |       |      |       |      |       |       |      |        |       |        |      |        |       |      |        |
|                                             |                                  | 0.1 uM                                                                                                                                                                                                                                                                                                                                                                                                                                                                                                                                                                                                                                                                            | 101.44           | 0.92                   | 133.08                     | 95.75      | 0.10                 | -6.01                    |  |      |              |                        |                            |            |                      |                          |        |        |      |        |       |      |       |      |       |      |       |       |      |        |       |        |      |        |       |      |        |
| 1 uM                                        | 94.11                            | 0.79                                                                                                                                                                                                                                                                                                                                                                                                                                                                                                                                                                                                                                                                              | 45.28            | 95.96                  | 0.08                       | -18.07     |                      |                          |  |      |              |                        |                            |            |                      |                          |        |        |      |        |       |      |       |      |       |      |       |       |      |        |       |        |      |        |       |      |        |
| 10 uM                                       | 114.12                           | 0.94                                                                                                                                                                                                                                                                                                                                                                                                                                                                                                                                                                                                                                                                              | 434.49           | 88.76                  | 0.05                       | -33.66     |                      |                          |  |      |              |                        |                            |            |                      |                          |        |        |      |        |       |      |       |      |       |      |       |       |      |        |       |        |      |        |       |      |        |

| Compound         | Normalized Values (A and B Sets) | Responses                                                                                                                                                                                                                                                                                                                                                                                                                                                                                                                                                                                                                                                                       |                  |                        |                            |            |                      |                          |  |      |              |                        |                            |            |                      |                          |        |       |      |        |       |      |        |      |       |      |       |       |      |        |       |       |      |       |       |      |        |
|------------------|----------------------------------|---------------------------------------------------------------------------------------------------------------------------------------------------------------------------------------------------------------------------------------------------------------------------------------------------------------------------------------------------------------------------------------------------------------------------------------------------------------------------------------------------------------------------------------------------------------------------------------------------------------------------------------------------------------------------------|------------------|------------------------|----------------------------|------------|----------------------|--------------------------|--|------|--------------|------------------------|----------------------------|------------|----------------------|--------------------------|--------|-------|------|--------|-------|------|--------|------|-------|------|-------|-------|------|--------|-------|-------|------|-------|-------|------|--------|
| <b>Tolcapone</b> |                                  | <table border="1"> <thead> <tr> <th colspan="7">Average Response</th> </tr> <tr> <th>Dose</th> <th>Green Signal</th> <th>Actual Pct Green Cells</th> <th>Normalized Pct Green Cells</th> <th>Red Signal</th> <th>Actual Pct Red Cells</th> <th>Normalized Pct Red Cells</th> </tr> </thead> <tbody> <tr> <td>0.1 uM</td> <td>79.25</td> <td>0.74</td> <td>203.85</td> <td>74.56</td> <td>0.02</td> <td>-52.76</td> </tr> <tr> <td>1 uM</td> <td>92.97</td> <td>0.77</td> <td>38.17</td> <td>82.57</td> <td>0.05</td> <td>-43.86</td> </tr> <tr> <td>10 uM</td> <td>82.05</td> <td>0.69</td> <td>45.97</td> <td>86.13</td> <td>0.04</td> <td>-43.05</td> </tr> </tbody> </table> | Average Response |                        |                            |            |                      |                          |  | Dose | Green Signal | Actual Pct Green Cells | Normalized Pct Green Cells | Red Signal | Actual Pct Red Cells | Normalized Pct Red Cells | 0.1 uM | 79.25 | 0.74 | 203.85 | 74.56 | 0.02 | -52.76 | 1 uM | 92.97 | 0.77 | 38.17 | 82.57 | 0.05 | -43.86 | 10 uM | 82.05 | 0.69 | 45.97 | 86.13 | 0.04 | -43.05 |
|                  |                                  | Average Response                                                                                                                                                                                                                                                                                                                                                                                                                                                                                                                                                                                                                                                                |                  |                        |                            |            |                      |                          |  |      |              |                        |                            |            |                      |                          |        |       |      |        |       |      |        |      |       |      |       |       |      |        |       |       |      |       |       |      |        |
|                  |                                  | Dose                                                                                                                                                                                                                                                                                                                                                                                                                                                                                                                                                                                                                                                                            | Green Signal     | Actual Pct Green Cells | Normalized Pct Green Cells | Red Signal | Actual Pct Red Cells | Normalized Pct Red Cells |  |      |              |                        |                            |            |                      |                          |        |       |      |        |       |      |        |      |       |      |       |       |      |        |       |       |      |       |       |      |        |
|                  |                                  | 0.1 uM                                                                                                                                                                                                                                                                                                                                                                                                                                                                                                                                                                                                                                                                          | 79.25            | 0.74                   | 203.85                     | 74.56      | 0.02                 | -52.76                   |  |      |              |                        |                            |            |                      |                          |        |       |      |        |       |      |        |      |       |      |       |       |      |        |       |       |      |       |       |      |        |
| 1 uM             | 92.97                            | 0.77                                                                                                                                                                                                                                                                                                                                                                                                                                                                                                                                                                                                                                                                            | 38.17            | 82.57                  | 0.05                       | -43.86     |                      |                          |  |      |              |                        |                            |            |                      |                          |        |       |      |        |       |      |        |      |       |      |       |       |      |        |       |       |      |       |       |      |        |
| 10 uM            | 82.05                            | 0.69                                                                                                                                                                                                                                                                                                                                                                                                                                                                                                                                                                                                                                                                            | 45.97            | 86.13                  | 0.04                       | -43.05     |                      |                          |  |      |              |                        |                            |            |                      |                          |        |       |      |        |       |      |        |      |       |      |       |       |      |        |       |       |      |       |       |      |        |

Compound

Normalized Values (A and B Sets)

Responses

| <b>Tolmetin Sodium</b> |        | Average Response |              |                        |                            |            |                      |                          |
|------------------------|--------|------------------|--------------|------------------------|----------------------------|------------|----------------------|--------------------------|
|                        |        | Dose             | Green Signal | Actual Pct Green Cells | Normalized Pct Green Cells | Red Signal | Actual Pct Red Cells | Normalized Pct Red Cells |
|                        |        | 0.1 uM           | 109.31       | 0.95                   | 176.76                     | 95.65      | 0.12                 | -1.98                    |
|                        |        | 1 uM             | 92.31        | 0.82                   | 66.13                      | 93.44      | 0.10                 | -18.99                   |
| 10 uM                  | 111.39 | 0.94             | 165.82       | 102.81                 | 0.14                       | 7.72       |                      |                          |

Compound

Normalized Values (A and B Sets)

Responses

| <b>Tolterodine tartrate</b> |       | Average Response |              |                        |                            |            |                      |                          |
|-----------------------------|-------|------------------|--------------|------------------------|----------------------------|------------|----------------------|--------------------------|
|                             |       | Dose             | Green Signal | Actual Pct Green Cells | Normalized Pct Green Cells | Red Signal | Actual Pct Red Cells | Normalized Pct Red Cells |
|                             |       | 0.1 uM           | 95.13        | 0.88                   | 86.44                      | 87.26      | 0.07                 | -21.85                   |
|                             |       | 1 uM             | 109.28       | 0.88                   | 85.31                      | 97.29      | 0.10                 | -9.96                    |
| 10 uM                       | 92.82 | 0.86             | 159.02       | 76.73                  | 0.03                       | -46.04     |                      |                          |

Compound

Normalized Values (A and B Sets)

Responses

| <b>Tolvaptan</b> |        | Average Response |              |                        |                            |            |                      |                          |
|------------------|--------|------------------|--------------|------------------------|----------------------------|------------|----------------------|--------------------------|
|                  |        | Dose             | Green Signal | Actual Pct Green Cells | Normalized Pct Green Cells | Red Signal | Actual Pct Red Cells | Normalized Pct Red Cells |
|                  |        | 0.1 uM           | 99.93        | 0.89                   | 91.99                      | 113.58     | 0.18                 | 28.86                    |
|                  |        | 1 uM             | 100.11       | 0.84                   | 59.05                      | 93.12      | 0.09                 | -14.72                   |
| 10 uM            | 107.97 | 0.92             | 53.30        | 116.73                 | 0.21                       | 40.21      |                      |                          |

Compound

Normalized Values (A and B Sets)

Responses

| <b>Torcetrapib</b> |        | Average Response |              |                        |                            |            |                      |                          |
|--------------------|--------|------------------|--------------|------------------------|----------------------------|------------|----------------------|--------------------------|
|                    |        | Dose             | Green Signal | Actual Pct Green Cells | Normalized Pct Green Cells | Red Signal | Actual Pct Red Cells | Normalized Pct Red Cells |
|                    |        | 0.1 uM           | 108.71       | 0.90                   | 110.19                     | 106.60     | 0.17                 | 28.01                    |
|                    |        | 1 uM             | 95.52        | 0.79                   | 41.76                      | 77.88      | 0.04                 | -39.97                   |
| 10 uM              | 108.26 | 0.92             | 324.32       | 99.31                  | 0.11                       | -5.76      |                      |                          |

Compound

Normalized Values (A and B Sets)

Responses

| <b>Torin 1</b> |        | Average Response |              |                        |                            |            |                      |                          |
|----------------|--------|------------------|--------------|------------------------|----------------------------|------------|----------------------|--------------------------|
|                |        | Dose             | Green Signal | Actual Pct Green Cells | Normalized Pct Green Cells | Red Signal | Actual Pct Red Cells | Normalized Pct Red Cells |
|                |        | 0.1 uM           | 98.93        | 0.91                   | 113.12                     | 123.12     | 0.22                 | 45.97                    |
|                |        | 1 uM             | 111.00       | 0.95                   | 123.91                     | 92.21      | 0.08                 | -20.51                   |
| 10 uM          | 107.82 | 0.94             | 400.41       | 106.41                 | 0.10                       | -11.02     |                      |                          |



Compound

Normalized Values (A and B Sets)

Responses

| Torin 2 |       |      | Average Response |              |                        |                            |            |                      |                          |
|---------|-------|------|------------------|--------------|------------------------|----------------------------|------------|----------------------|--------------------------|
|         |       |      | Dose             | Green Signal | Actual Pct Green Cells | Normalized Pct Green Cells | Red Signal | Actual Pct Red Cells | Normalized Pct Red Cells |
|         |       |      | 0.1 uM           | 106.77       | 0.95                   | 154.97                     | 111.56     | 0.17                 | 27.50                    |
|         |       |      | 1 uM             | 106.13       | 0.82                   | 70.25                      | 90.62      | 0.12                 | -2.53                    |
| 10 uM   | 66.69 | 0.50 | 1558.68          | 97.89        | 0.16                   | 16.89                      |            |                      |                          |

Compound

Normalized Values (A and B Sets)

Responses

| Tosedostat (CHR2797) |       |      | Average Response |              |                        |                            |            |                      |                          |
|----------------------|-------|------|------------------|--------------|------------------------|----------------------------|------------|----------------------|--------------------------|
|                      |       |      | Dose             | Green Signal | Actual Pct Green Cells | Normalized Pct Green Cells | Red Signal | Actual Pct Red Cells | Normalized Pct Red Cells |
|                      |       |      | 0.1 uM           | 87.43        | 0.72                   | -3.27                      | 98.90      | 0.09                 | -29.28                   |
|                      |       |      | 1 uM             | 82.78        | 0.64                   | -94.28                     | 95.46      | 0.09                 | -15.66                   |
| 10 uM                | 91.08 | 0.65 | -32.37           | 91.43        | 0.10                   | -6.53                      |            |                      |                          |

Compound

Normalized Values (A and B Sets)

Responses

| Trametinib (GSK1120212) |       |      | Average Response |              |                        |                            |            |                      |                          |
|-------------------------|-------|------|------------------|--------------|------------------------|----------------------------|------------|----------------------|--------------------------|
|                         |       |      | Dose             | Green Signal | Actual Pct Green Cells | Normalized Pct Green Cells | Red Signal | Actual Pct Red Cells | Normalized Pct Red Cells |
|                         |       |      | 0.1 uM           | 94.77        | 0.90                   | 101.14                     | 102.65     | 0.14                 | 12.31                    |
|                         |       |      | 1 uM             | 99.99        | 0.83                   | 69.16                      | 92.83      | 0.09                 | -16.01                   |
| 10 uM                   | 96.66 | 0.84 | 117.17           | 72.94        | 0.04                   | -40.17                     |            |                      |                          |

Compound

Normalized Values (A and B Sets)

Responses

| Triamcinolone Acetonide |       |      | Average Response |              |                        |                            |            |                      |                          |
|-------------------------|-------|------|------------------|--------------|------------------------|----------------------------|------------|----------------------|--------------------------|
|                         |       |      | Dose             | Green Signal | Actual Pct Green Cells | Normalized Pct Green Cells | Red Signal | Actual Pct Red Cells | Normalized Pct Red Cells |
|                         |       |      | 0.1 uM           | 94.42        | 0.86                   | 70.22                      | 90.77      | 0.06                 | -44.45                   |
|                         |       |      | 1 uM             | 93.54        | 0.83                   | 14.24                      | 89.31      | 0.05                 | -33.11                   |
| 10 uM                   | 91.36 | 0.75 | 16.88            | 95.37        | 0.06                   | -31.31                     |            |                      |                          |

Compound

Normalized Values (A and B Sets)

Responses

| Trichostatin A (TSA) |        |      | Average Response |              |                        |                            |            |                      |                          |
|----------------------|--------|------|------------------|--------------|------------------------|----------------------------|------------|----------------------|--------------------------|
|                      |        |      | Dose             | Green Signal | Actual Pct Green Cells | Normalized Pct Green Cells | Red Signal | Actual Pct Red Cells | Normalized Pct Red Cells |
|                      |        |      | 0.1 uM           | 90.47        | 0.85                   | 34.31                      | 77.97      | 0.03                 | -54.36                   |
| 1 uM                 | 120.06 | 0.95 | 175.60           | 107.00       | 0.07                   | -24.04                     |            |                      |                          |



Compound

Normalized Values (A and B Sets)

Responses

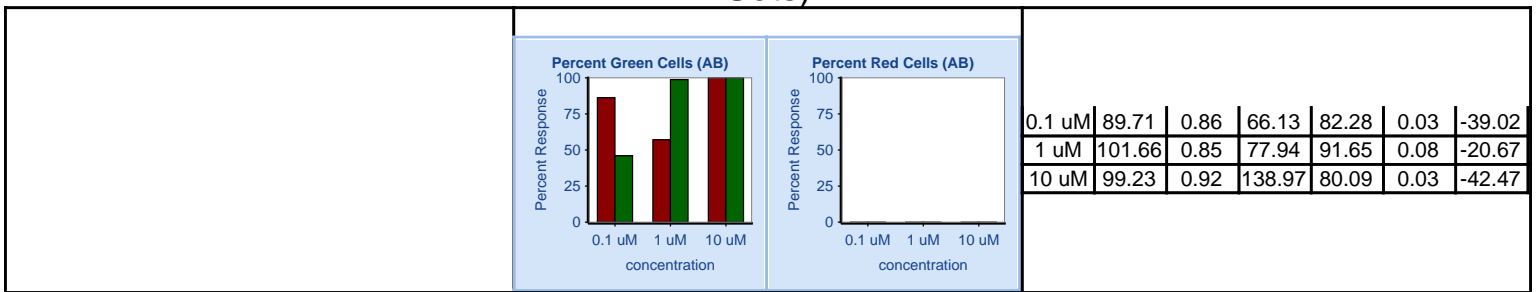

Compound

Normalized Values (A and B Sets)

Responses

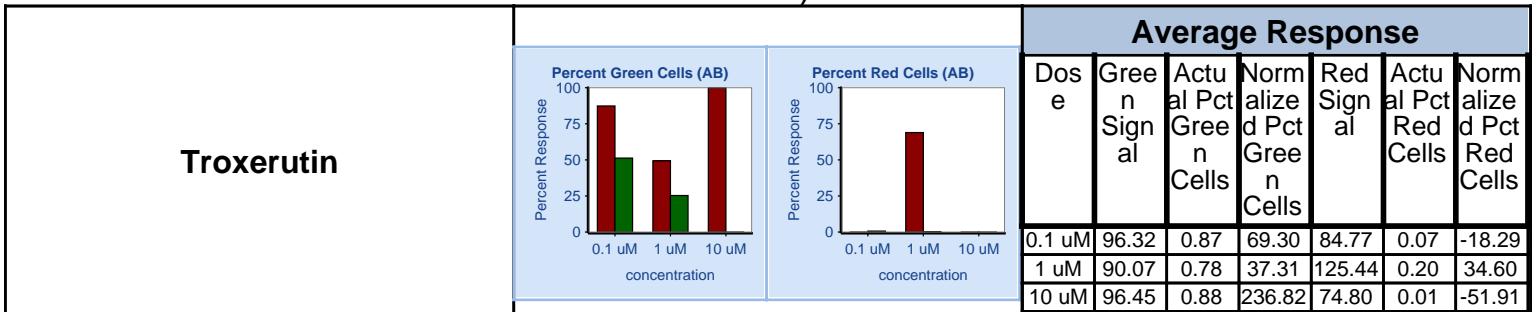

Compound

Normalized Values (A and B Sets)

Responses

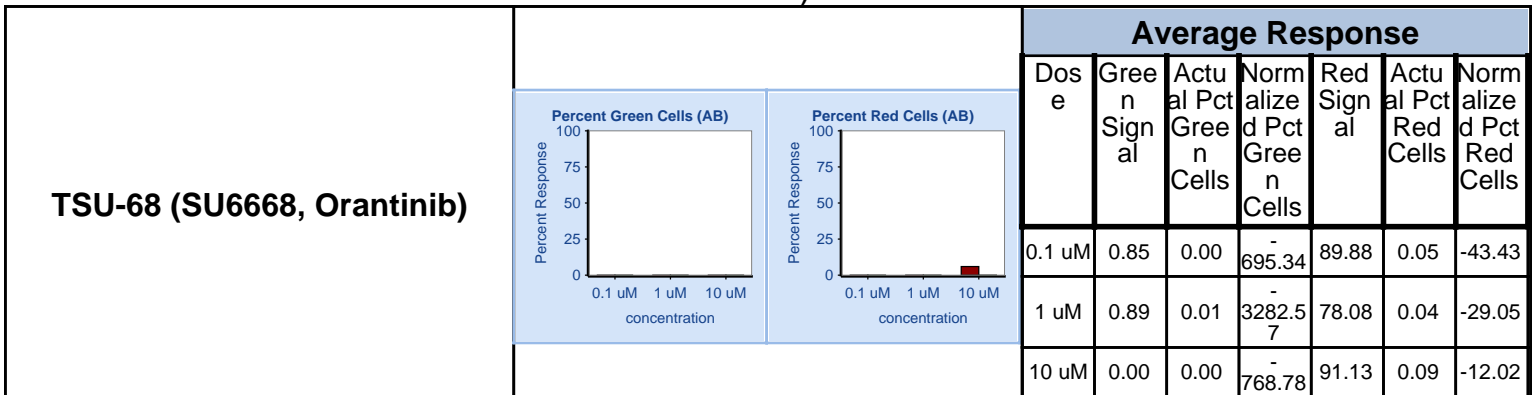

Compound

Normalized Values (A and B Sets)

Responses

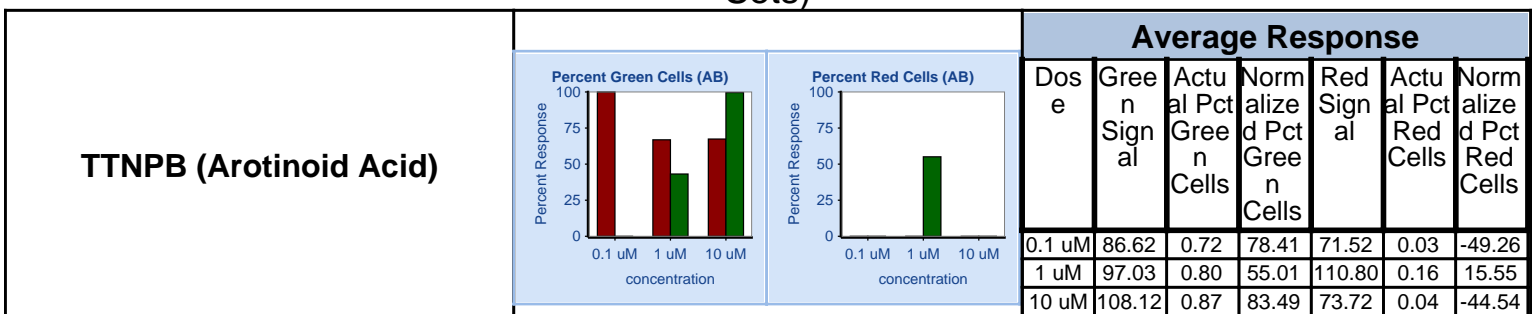

Compound

Normalized Values (A and B Sets)

Responses

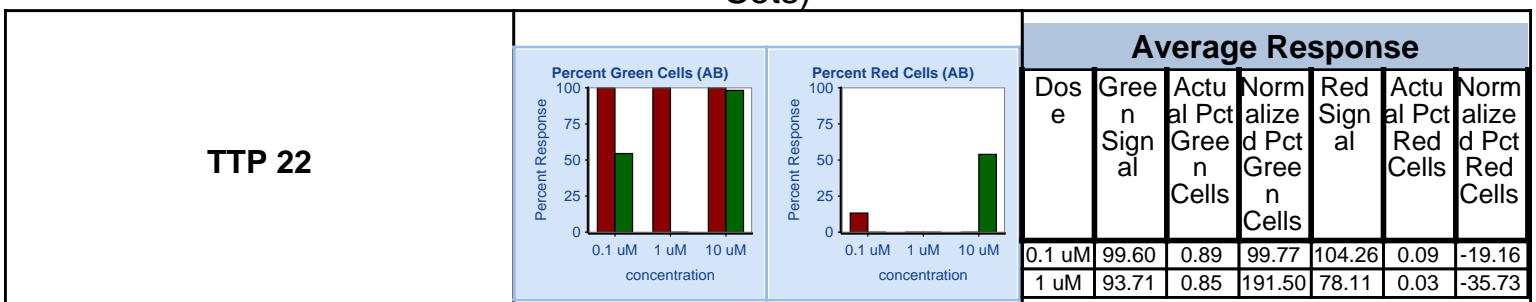

| Compound | Normalized Values (A and B Sets) | Responses |        |      |        |       |      |      |
|----------|----------------------------------|-----------|--------|------|--------|-------|------|------|
|          |                                  | 10 uM     | 105.03 | 0.94 | 123.80 | 87.54 | 0.12 | 1.71 |

| Compound            | Normalized Values (A and B Sets) | Responses               |              |                        |                            |            |                      |                          |
|---------------------|----------------------------------|-------------------------|--------------|------------------------|----------------------------|------------|----------------------|--------------------------|
| <b>Tubastatin A</b> |                                  | <b>Average Response</b> |              |                        |                            |            |                      |                          |
|                     |                                  | Dose                    | Green Signal | Actual Pct Green Cells | Normalized Pct Green Cells | Red Signal | Actual Pct Red Cells | Normalized Pct Red Cells |
|                     |                                  | 0.1 uM                  | 92.83        | 0.85                   | 60.38                      | 82.75      | 0.03                 | -58.53                   |
|                     |                                  | 1 uM                    | 92.19        | 0.85                   | 118.66                     | 64.43      | 0.01                 | -44.49                   |
| 10 uM               | 91.92                            | 0.86                    | 46.36        | 101.28                 | 0.14                       | 9.63       |                      |                          |

| Compound                | Normalized Values (A and B Sets) | Responses               |              |                        |                            |            |                      |                          |
|-------------------------|----------------------------------|-------------------------|--------------|------------------------|----------------------------|------------|----------------------|--------------------------|
| <b>Tubastatin A HCl</b> |                                  | <b>Average Response</b> |              |                        |                            |            |                      |                          |
|                         |                                  | Dose                    | Green Signal | Actual Pct Green Cells | Normalized Pct Green Cells | Red Signal | Actual Pct Red Cells | Normalized Pct Red Cells |
|                         |                                  | 0.1 uM                  | 88.50        | 0.83                   | 32.60                      | 116.63     | 0.18                 | 31.89                    |
|                         |                                  | 1 uM                    | 106.95       | 0.86                   | 92.10                      | 106.42     | 0.17                 | 21.29                    |
| 10 uM                   | 105.11                           | 0.95                    | 426.44       | 107.72                 | 0.14                       | 9.25       |                      |                          |

| Compound     | Normalized Values (A and B Sets) | Responses               |              |                        |                            |            |                      |                          |
|--------------|----------------------------------|-------------------------|--------------|------------------------|----------------------------|------------|----------------------|--------------------------|
| <b>TW-37</b> |                                  | <b>Average Response</b> |              |                        |                            |            |                      |                          |
|              |                                  | Dose                    | Green Signal | Actual Pct Green Cells | Normalized Pct Green Cells | Red Signal | Actual Pct Red Cells | Normalized Pct Red Cells |
|              |                                  | 0.1 uM                  | 85.70        | 0.80                   | 38.99                      | 75.17      | 0.02                 | -63.45                   |
|              |                                  | 1 uM                    | 77.56        | 0.57                   | -98.07                     | 110.07     | 0.12                 | -2.87                    |
| 10 uM        | 95.63                            | 0.72                    | 5.23         | 92.70                  | 0.08                       | -17.19     |                      |                          |

| Compound                | Normalized Values (A and B Sets) | Responses               |              |                        |                            |            |                      |                          |
|-------------------------|----------------------------------|-------------------------|--------------|------------------------|----------------------------|------------|----------------------|--------------------------|
| <b>Tylosin tartrate</b> |                                  | <b>Average Response</b> |              |                        |                            |            |                      |                          |
|                         |                                  | Dose                    | Green Signal | Actual Pct Green Cells | Normalized Pct Green Cells | Red Signal | Actual Pct Red Cells | Normalized Pct Red Cells |
|                         |                                  | 0.1 uM                  | 91.73        | 0.87                   | 135.43                     | 91.36      | 0.07                 | -29.81                   |
|                         |                                  | 1 uM                    | 83.91        | 0.76                   | 26.43                      | 107.82     | 0.15                 | 6.06                     |
| 10 uM                   | 85.89                            | 0.78                    | 76.61        | 82.92                  | 0.04                       | -44.06     |                      |                          |

| Compound                 | Normalized Values (A and B Sets) | Responses               |              |                        |                            |            |                      |
|--------------------------|----------------------------------|-------------------------|--------------|------------------------|----------------------------|------------|----------------------|
| <b>Tyrphostin AG 879</b> |                                  | <b>Average Response</b> |              |                        |                            |            |                      |
|                          |                                  | Dose                    | Green Signal | Actual Pct Green Cells | Normalized Pct Green Cells | Red Signal | Actual Pct Red Cells |

Compound

Normalized Values (A and B Sets)

Responses

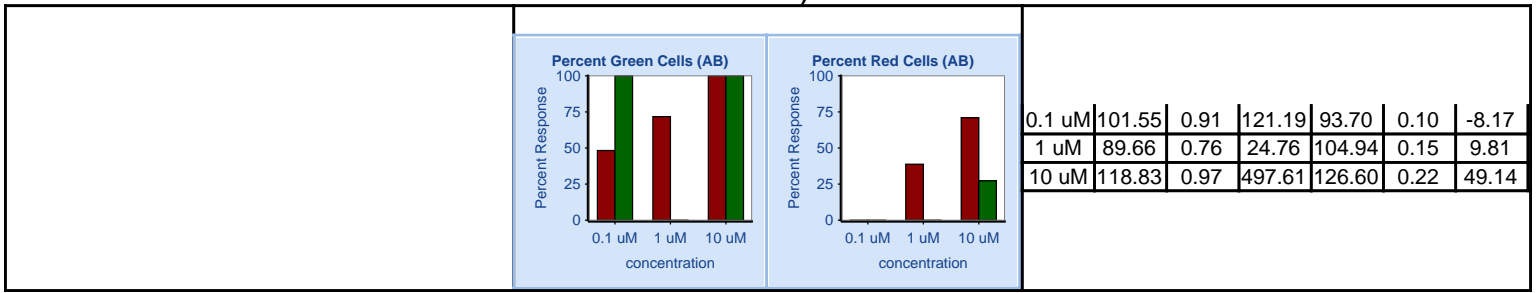

Compound

Normalized Values (A and B Sets)

Responses

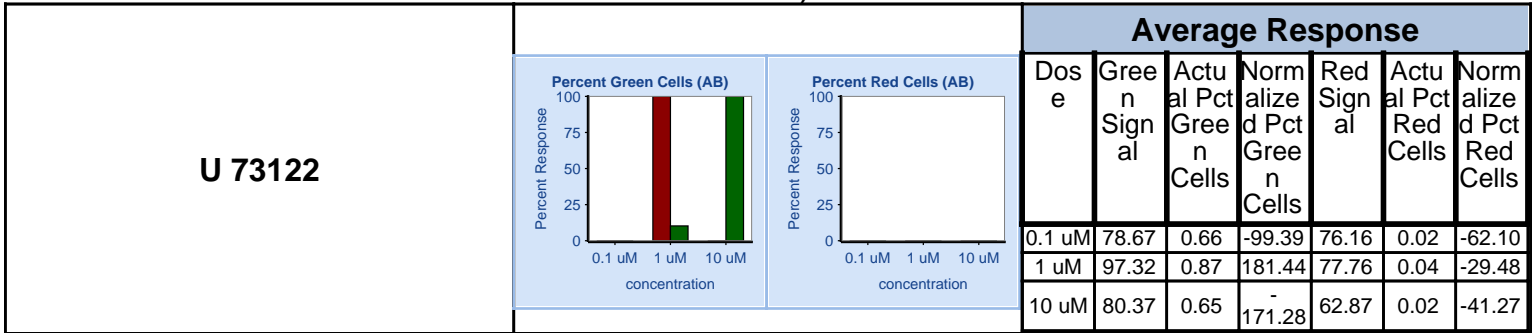

Compound

Normalized Values (A and B Sets)

Responses

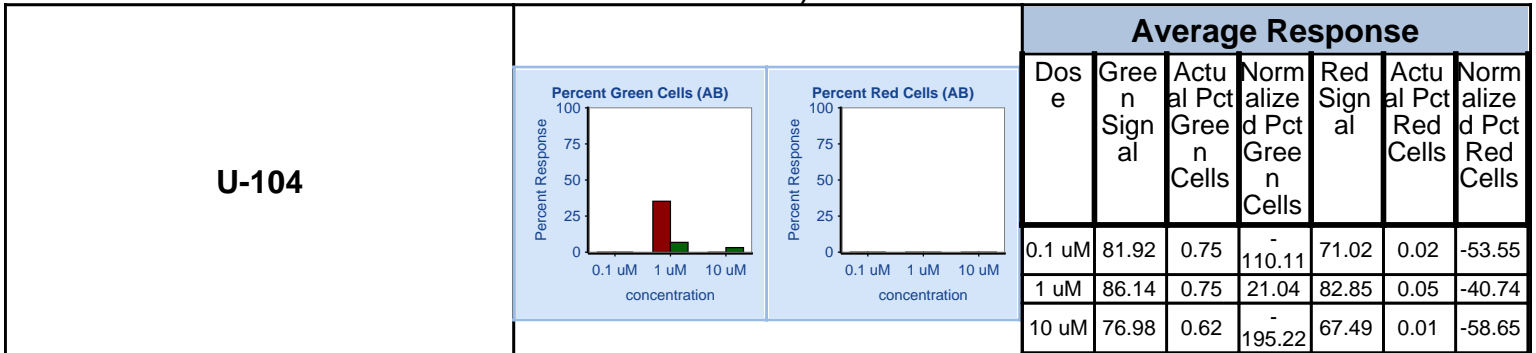

Compound

Normalized Values (A and B Sets)

Responses

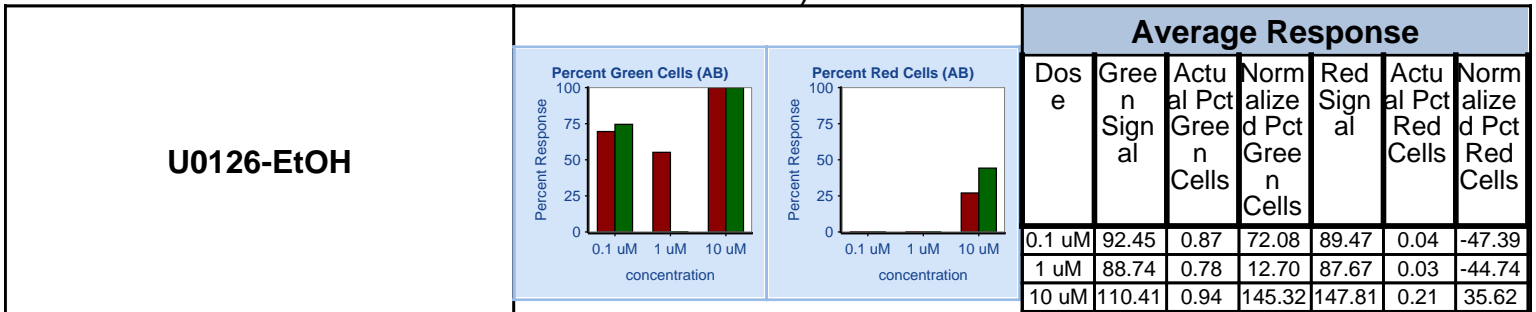

Compound

Normalized Values (A and B Sets)

Responses

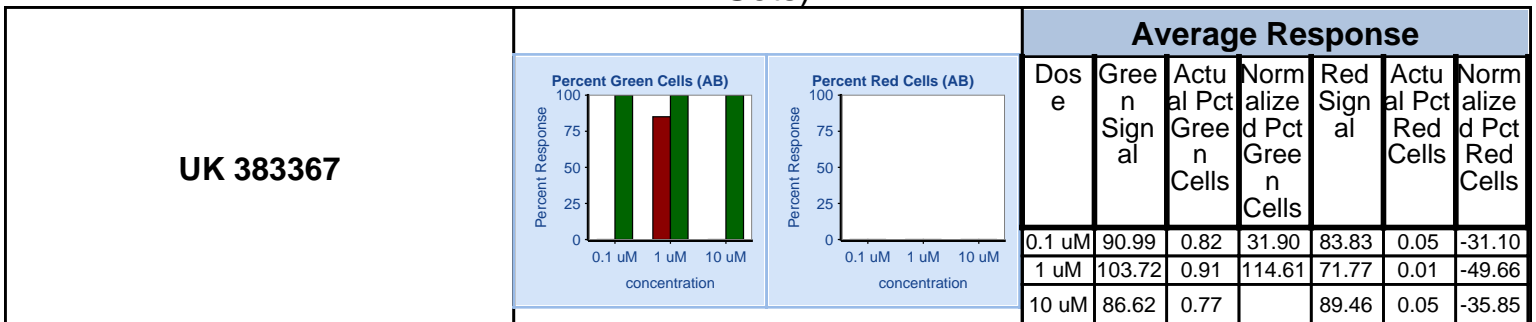



Compound

Normalized Values (A and B Sets)

Responses

|       |        | Actual Pct Green Cells | Normalized Pct Green Cells |        |        | Actual Pct Red Cells | Normalized Pct Red Cells |        |
|-------|--------|------------------------|----------------------------|--------|--------|----------------------|--------------------------|--------|
|       |        | 0.1 uM                 | 101.33                     | 0.91   | 204.82 | 99.67                | 0.13                     | 5.52   |
|       |        | 1 uM                   | 98.17                      | 0.84   | 84.65  | 98.08                | 0.10                     | -15.88 |
| 10 uM | 109.49 | 0.94                   | 150.74                     | 105.96 | 0.14   | 10.58                |                          |        |

Compound

Normalized Values (A and B Sets)

Responses

| UPF 1069 |       | Average Response |              |                        |                            |            |                      |                          |
|----------|-------|------------------|--------------|------------------------|----------------------------|------------|----------------------|--------------------------|
|          |       | Dose             | Green Signal | Actual Pct Green Cells | Normalized Pct Green Cells | Red Signal | Actual Pct Red Cells | Normalized Pct Red Cells |
|          |       | 0.1 uM           | 111.49       | 0.95                   | 152.71                     | 73.32      | 0.03                 | -58.64                   |
|          |       | 1 uM             | 103.26       | 0.86                   | 216.30                     | 66.07      | 0.02                 | -38.92                   |
| 10 uM    | 89.85 | 0.85             | 37.25        | 73.65                  | 0.06                       | -23.91     |                      |                          |

Compound

Normalized Values (A and B Sets)

Responses

| URB597 |       | Average Response |              |                        |                            |            |                      |                          |
|--------|-------|------------------|--------------|------------------------|----------------------------|------------|----------------------|--------------------------|
|        |       | Dose             | Green Signal | Actual Pct Green Cells | Normalized Pct Green Cells | Red Signal | Actual Pct Red Cells | Normalized Pct Red Cells |
|        |       | 0.1 uM           | 102.47       | 0.92                   | 119.63                     | 86.84      | 0.08                 | -21.20                   |
|        |       | 1 uM             | 98.81        | 0.82                   | 50.98                      | 80.77      | 0.04                 | -37.84                   |
| 10 uM  | 89.11 | 0.88             | 66.77        | 81.24                  | 0.03                       | -42.94     |                      |                          |

Compound

Normalized Values (A and B Sets)

Responses

| Uridine |       | Average Response |              |                        |                            |            |                      |                          |
|---------|-------|------------------|--------------|------------------------|----------------------------|------------|----------------------|--------------------------|
|         |       | Dose             | Green Signal | Actual Pct Green Cells | Normalized Pct Green Cells | Red Signal | Actual Pct Red Cells | Normalized Pct Red Cells |
|         |       | 0.1 uM           | 107.08       | 0.91                   | 120.23                     | 103.92     | 0.11                 | -9.38                    |
|         |       | 1 uM             | 93.66        | 0.81                   | 21.26                      | 85.52      | 0.06                 | -31.54                   |
| 10 uM   | 95.99 | 0.82             | 64.20        | 89.78                  | 0.03                       | -39.35     |                      |                          |

Compound

Normalized Values (A and B Sets)

Responses

| Ursolic Acid |       | Average Response |              |                        |                            |            |                      |                          |
|--------------|-------|------------------|--------------|------------------------|----------------------------|------------|----------------------|--------------------------|
|              |       | Dose             | Green Signal | Actual Pct Green Cells | Normalized Pct Green Cells | Red Signal | Actual Pct Red Cells | Normalized Pct Red Cells |
|              |       | 0.1 uM           | 74.05        | 0.68                   | 129.24                     | 80.04      | 0.03                 | -39.38                   |
|              |       | 1 uM             | 96.40        | 0.80                   | 43.02                      | 93.88      | 0.07                 | -26.06                   |
| 10 uM        | 93.69 | 0.88             | -49.24       | 82.66                  | 0.03                       | -43.55     |                      |                          |



| Compound                  | Normalized Values (A and B Sets) | Responses                                                                                                                                                                                                                                                                                                                                                                                                                                                                                                                                                                                                                                                                        |                  |                        |                            |            |                      |                          |  |      |              |                        |                            |            |                      |                          |        |       |      |        |       |      |        |      |       |      |       |        |      |       |       |       |      |        |       |      |        |
|---------------------------|----------------------------------|----------------------------------------------------------------------------------------------------------------------------------------------------------------------------------------------------------------------------------------------------------------------------------------------------------------------------------------------------------------------------------------------------------------------------------------------------------------------------------------------------------------------------------------------------------------------------------------------------------------------------------------------------------------------------------|------------------|------------------------|----------------------------|------------|----------------------|--------------------------|--|------|--------------|------------------------|----------------------------|------------|----------------------|--------------------------|--------|-------|------|--------|-------|------|--------|------|-------|------|-------|--------|------|-------|-------|-------|------|--------|-------|------|--------|
| <b>Valganciclovir HCl</b> |                                  | <table border="1"> <thead> <tr> <th colspan="7">Average Response</th> </tr> <tr> <th>Dose</th> <th>Green Signal</th> <th>Actual Pct Green Cells</th> <th>Normalized Pct Green Cells</th> <th>Red Signal</th> <th>Actual Pct Red Cells</th> <th>Normalized Pct Red Cells</th> </tr> </thead> <tbody> <tr> <td>0.1 uM</td> <td>90.34</td> <td>0.87</td> <td>194.49</td> <td>81.41</td> <td>0.05</td> <td>-36.60</td> </tr> <tr> <td>1 uM</td> <td>93.37</td> <td>0.83</td> <td>77.32</td> <td>115.41</td> <td>0.17</td> <td>21.38</td> </tr> <tr> <td>10 uM</td> <td>96.20</td> <td>0.76</td> <td>131.96</td> <td>95.00</td> <td>0.08</td> <td>-22.10</td> </tr> </tbody> </table> | Average Response |                        |                            |            |                      |                          |  | Dose | Green Signal | Actual Pct Green Cells | Normalized Pct Green Cells | Red Signal | Actual Pct Red Cells | Normalized Pct Red Cells | 0.1 uM | 90.34 | 0.87 | 194.49 | 81.41 | 0.05 | -36.60 | 1 uM | 93.37 | 0.83 | 77.32 | 115.41 | 0.17 | 21.38 | 10 uM | 96.20 | 0.76 | 131.96 | 95.00 | 0.08 | -22.10 |
|                           |                                  | Average Response                                                                                                                                                                                                                                                                                                                                                                                                                                                                                                                                                                                                                                                                 |                  |                        |                            |            |                      |                          |  |      |              |                        |                            |            |                      |                          |        |       |      |        |       |      |        |      |       |      |       |        |      |       |       |       |      |        |       |      |        |
|                           |                                  | Dose                                                                                                                                                                                                                                                                                                                                                                                                                                                                                                                                                                                                                                                                             | Green Signal     | Actual Pct Green Cells | Normalized Pct Green Cells | Red Signal | Actual Pct Red Cells | Normalized Pct Red Cells |  |      |              |                        |                            |            |                      |                          |        |       |      |        |       |      |        |      |       |      |       |        |      |       |       |       |      |        |       |      |        |
|                           |                                  | 0.1 uM                                                                                                                                                                                                                                                                                                                                                                                                                                                                                                                                                                                                                                                                           | 90.34            | 0.87                   | 194.49                     | 81.41      | 0.05                 | -36.60                   |  |      |              |                        |                            |            |                      |                          |        |       |      |        |       |      |        |      |       |      |       |        |      |       |       |       |      |        |       |      |        |
| 1 uM                      | 93.37                            | 0.83                                                                                                                                                                                                                                                                                                                                                                                                                                                                                                                                                                                                                                                                             | 77.32            | 115.41                 | 0.17                       | 21.38      |                      |                          |  |      |              |                        |                            |            |                      |                          |        |       |      |        |       |      |        |      |       |      |       |        |      |       |       |       |      |        |       |      |        |
| 10 uM                     | 96.20                            | 0.76                                                                                                                                                                                                                                                                                                                                                                                                                                                                                                                                                                                                                                                                             | 131.96           | 95.00                  | 0.08                       | -22.10     |                      |                          |  |      |              |                        |                            |            |                      |                          |        |       |      |        |       |      |        |      |       |      |       |        |      |       |       |       |      |        |       |      |        |

| Compound              | Normalized Values (A and B Sets) | Responses                                                                                                                                                                                                                                                                                                                                                                                                                                                                                                                                                                                                                                                                     |                  |                        |                            |            |                      |                          |  |      |              |                        |                            |            |                      |                          |        |       |      |       |       |      |        |      |       |      |       |       |      |        |       |       |      |      |       |      |        |
|-----------------------|----------------------------------|-------------------------------------------------------------------------------------------------------------------------------------------------------------------------------------------------------------------------------------------------------------------------------------------------------------------------------------------------------------------------------------------------------------------------------------------------------------------------------------------------------------------------------------------------------------------------------------------------------------------------------------------------------------------------------|------------------|------------------------|----------------------------|------------|----------------------|--------------------------|--|------|--------------|------------------------|----------------------------|------------|----------------------|--------------------------|--------|-------|------|-------|-------|------|--------|------|-------|------|-------|-------|------|--------|-------|-------|------|------|-------|------|--------|
| <b>Valnemulin HCl</b> |                                  | <table border="1"> <thead> <tr> <th colspan="7">Average Response</th> </tr> <tr> <th>Dose</th> <th>Green Signal</th> <th>Actual Pct Green Cells</th> <th>Normalized Pct Green Cells</th> <th>Red Signal</th> <th>Actual Pct Red Cells</th> <th>Normalized Pct Red Cells</th> </tr> </thead> <tbody> <tr> <td>0.1 uM</td> <td>98.27</td> <td>0.89</td> <td>60.30</td> <td>82.89</td> <td>0.06</td> <td>-32.73</td> </tr> <tr> <td>1 uM</td> <td>98.84</td> <td>0.85</td> <td>95.51</td> <td>86.87</td> <td>0.05</td> <td>-44.56</td> </tr> <tr> <td>10 uM</td> <td>86.67</td> <td>0.77</td> <td>8.72</td> <td>84.36</td> <td>0.07</td> <td>-29.48</td> </tr> </tbody> </table> | Average Response |                        |                            |            |                      |                          |  | Dose | Green Signal | Actual Pct Green Cells | Normalized Pct Green Cells | Red Signal | Actual Pct Red Cells | Normalized Pct Red Cells | 0.1 uM | 98.27 | 0.89 | 60.30 | 82.89 | 0.06 | -32.73 | 1 uM | 98.84 | 0.85 | 95.51 | 86.87 | 0.05 | -44.56 | 10 uM | 86.67 | 0.77 | 8.72 | 84.36 | 0.07 | -29.48 |
|                       |                                  | Average Response                                                                                                                                                                                                                                                                                                                                                                                                                                                                                                                                                                                                                                                              |                  |                        |                            |            |                      |                          |  |      |              |                        |                            |            |                      |                          |        |       |      |       |       |      |        |      |       |      |       |       |      |        |       |       |      |      |       |      |        |
|                       |                                  | Dose                                                                                                                                                                                                                                                                                                                                                                                                                                                                                                                                                                                                                                                                          | Green Signal     | Actual Pct Green Cells | Normalized Pct Green Cells | Red Signal | Actual Pct Red Cells | Normalized Pct Red Cells |  |      |              |                        |                            |            |                      |                          |        |       |      |       |       |      |        |      |       |      |       |       |      |        |       |       |      |      |       |      |        |
|                       |                                  | 0.1 uM                                                                                                                                                                                                                                                                                                                                                                                                                                                                                                                                                                                                                                                                        | 98.27            | 0.89                   | 60.30                      | 82.89      | 0.06                 | -32.73                   |  |      |              |                        |                            |            |                      |                          |        |       |      |       |       |      |        |      |       |      |       |       |      |        |       |       |      |      |       |      |        |
| 1 uM                  | 98.84                            | 0.85                                                                                                                                                                                                                                                                                                                                                                                                                                                                                                                                                                                                                                                                          | 95.51            | 86.87                  | 0.05                       | -44.56     |                      |                          |  |      |              |                        |                            |            |                      |                          |        |       |      |       |       |      |        |      |       |      |       |       |      |        |       |       |      |      |       |      |        |
| 10 uM                 | 86.67                            | 0.77                                                                                                                                                                                                                                                                                                                                                                                                                                                                                                                                                                                                                                                                          | 8.72             | 84.36                  | 0.07                       | -29.48     |                      |                          |  |      |              |                        |                            |            |                      |                          |        |       |      |       |       |      |        |      |       |      |       |       |      |        |       |       |      |      |       |      |        |

| Compound        | Normalized Values (A and B Sets) | Responses                                                                                                                                                                                                                                                                                                                                                                                                                                                                                                                                                                                                                                                                       |                  |                        |                            |            |                      |                          |  |      |              |                        |                            |            |                      |                          |        |       |      |        |       |      |        |      |       |      |       |        |      |       |       |       |      |       |       |      |        |
|-----------------|----------------------------------|---------------------------------------------------------------------------------------------------------------------------------------------------------------------------------------------------------------------------------------------------------------------------------------------------------------------------------------------------------------------------------------------------------------------------------------------------------------------------------------------------------------------------------------------------------------------------------------------------------------------------------------------------------------------------------|------------------|------------------------|----------------------------|------------|----------------------|--------------------------|--|------|--------------|------------------------|----------------------------|------------|----------------------|--------------------------|--------|-------|------|--------|-------|------|--------|------|-------|------|-------|--------|------|-------|-------|-------|------|-------|-------|------|--------|
| <b>Vanillin</b> |                                  | <table border="1"> <thead> <tr> <th colspan="7">Average Response</th> </tr> <tr> <th>Dose</th> <th>Green Signal</th> <th>Actual Pct Green Cells</th> <th>Normalized Pct Green Cells</th> <th>Red Signal</th> <th>Actual Pct Red Cells</th> <th>Normalized Pct Red Cells</th> </tr> </thead> <tbody> <tr> <td>0.1 uM</td> <td>96.36</td> <td>0.91</td> <td>211.42</td> <td>93.03</td> <td>0.06</td> <td>-30.64</td> </tr> <tr> <td>1 uM</td> <td>98.60</td> <td>0.83</td> <td>78.05</td> <td>105.54</td> <td>0.12</td> <td>-5.00</td> </tr> <tr> <td>10 uM</td> <td>99.75</td> <td>0.83</td> <td>86.26</td> <td>87.47</td> <td>0.04</td> <td>-39.26</td> </tr> </tbody> </table> | Average Response |                        |                            |            |                      |                          |  | Dose | Green Signal | Actual Pct Green Cells | Normalized Pct Green Cells | Red Signal | Actual Pct Red Cells | Normalized Pct Red Cells | 0.1 uM | 96.36 | 0.91 | 211.42 | 93.03 | 0.06 | -30.64 | 1 uM | 98.60 | 0.83 | 78.05 | 105.54 | 0.12 | -5.00 | 10 uM | 99.75 | 0.83 | 86.26 | 87.47 | 0.04 | -39.26 |
|                 |                                  | Average Response                                                                                                                                                                                                                                                                                                                                                                                                                                                                                                                                                                                                                                                                |                  |                        |                            |            |                      |                          |  |      |              |                        |                            |            |                      |                          |        |       |      |        |       |      |        |      |       |      |       |        |      |       |       |       |      |       |       |      |        |
|                 |                                  | Dose                                                                                                                                                                                                                                                                                                                                                                                                                                                                                                                                                                                                                                                                            | Green Signal     | Actual Pct Green Cells | Normalized Pct Green Cells | Red Signal | Actual Pct Red Cells | Normalized Pct Red Cells |  |      |              |                        |                            |            |                      |                          |        |       |      |        |       |      |        |      |       |      |       |        |      |       |       |       |      |       |       |      |        |
|                 |                                  | 0.1 uM                                                                                                                                                                                                                                                                                                                                                                                                                                                                                                                                                                                                                                                                          | 96.36            | 0.91                   | 211.42                     | 93.03      | 0.06                 | -30.64                   |  |      |              |                        |                            |            |                      |                          |        |       |      |        |       |      |        |      |       |      |       |        |      |       |       |       |      |       |       |      |        |
| 1 uM            | 98.60                            | 0.83                                                                                                                                                                                                                                                                                                                                                                                                                                                                                                                                                                                                                                                                            | 78.05            | 105.54                 | 0.12                       | -5.00      |                      |                          |  |      |              |                        |                            |            |                      |                          |        |       |      |        |       |      |        |      |       |      |       |        |      |       |       |       |      |       |       |      |        |
| 10 uM           | 99.75                            | 0.83                                                                                                                                                                                                                                                                                                                                                                                                                                                                                                                                                                                                                                                                            | 86.26            | 87.47                  | 0.04                       | -39.26     |                      |                          |  |      |              |                        |                            |            |                      |                          |        |       |      |        |       |      |        |      |       |      |       |        |      |       |       |       |      |       |       |      |        |

| Compound               | Normalized Values (A and B Sets) | Responses                                                                                                                                                                                                                                                                                                                                                                                                                                                                                                                                                                                                                                                                         |                  |                        |                            |            |                      |                          |  |      |              |                        |                            |            |                      |                          |        |        |      |        |       |      |        |      |       |      |       |       |      |        |       |       |      |        |       |      |        |
|------------------------|----------------------------------|-----------------------------------------------------------------------------------------------------------------------------------------------------------------------------------------------------------------------------------------------------------------------------------------------------------------------------------------------------------------------------------------------------------------------------------------------------------------------------------------------------------------------------------------------------------------------------------------------------------------------------------------------------------------------------------|------------------|------------------------|----------------------------|------------|----------------------|--------------------------|--|------|--------------|------------------------|----------------------------|------------|----------------------|--------------------------|--------|--------|------|--------|-------|------|--------|------|-------|------|-------|-------|------|--------|-------|-------|------|--------|-------|------|--------|
| <b>Vanillylacetone</b> |                                  | <table border="1"> <thead> <tr> <th colspan="7">Average Response</th> </tr> <tr> <th>Dose</th> <th>Green Signal</th> <th>Actual Pct Green Cells</th> <th>Normalized Pct Green Cells</th> <th>Red Signal</th> <th>Actual Pct Red Cells</th> <th>Normalized Pct Red Cells</th> </tr> </thead> <tbody> <tr> <td>0.1 uM</td> <td>100.75</td> <td>0.90</td> <td>106.44</td> <td>77.90</td> <td>0.03</td> <td>-40.13</td> </tr> <tr> <td>1 uM</td> <td>92.79</td> <td>0.79</td> <td>46.39</td> <td>69.21</td> <td>0.02</td> <td>-46.55</td> </tr> <tr> <td>10 uM</td> <td>96.16</td> <td>0.89</td> <td>-20.39</td> <td>72.20</td> <td>0.02</td> <td>-51.38</td> </tr> </tbody> </table> | Average Response |                        |                            |            |                      |                          |  | Dose | Green Signal | Actual Pct Green Cells | Normalized Pct Green Cells | Red Signal | Actual Pct Red Cells | Normalized Pct Red Cells | 0.1 uM | 100.75 | 0.90 | 106.44 | 77.90 | 0.03 | -40.13 | 1 uM | 92.79 | 0.79 | 46.39 | 69.21 | 0.02 | -46.55 | 10 uM | 96.16 | 0.89 | -20.39 | 72.20 | 0.02 | -51.38 |
|                        |                                  | Average Response                                                                                                                                                                                                                                                                                                                                                                                                                                                                                                                                                                                                                                                                  |                  |                        |                            |            |                      |                          |  |      |              |                        |                            |            |                      |                          |        |        |      |        |       |      |        |      |       |      |       |       |      |        |       |       |      |        |       |      |        |
|                        |                                  | Dose                                                                                                                                                                                                                                                                                                                                                                                                                                                                                                                                                                                                                                                                              | Green Signal     | Actual Pct Green Cells | Normalized Pct Green Cells | Red Signal | Actual Pct Red Cells | Normalized Pct Red Cells |  |      |              |                        |                            |            |                      |                          |        |        |      |        |       |      |        |      |       |      |       |       |      |        |       |       |      |        |       |      |        |
|                        |                                  | 0.1 uM                                                                                                                                                                                                                                                                                                                                                                                                                                                                                                                                                                                                                                                                            | 100.75           | 0.90                   | 106.44                     | 77.90      | 0.03                 | -40.13                   |  |      |              |                        |                            |            |                      |                          |        |        |      |        |       |      |        |      |       |      |       |       |      |        |       |       |      |        |       |      |        |
| 1 uM                   | 92.79                            | 0.79                                                                                                                                                                                                                                                                                                                                                                                                                                                                                                                                                                                                                                                                              | 46.39            | 69.21                  | 0.02                       | -46.55     |                      |                          |  |      |              |                        |                            |            |                      |                          |        |        |      |        |       |      |        |      |       |      |       |       |      |        |       |       |      |        |       |      |        |
| 10 uM                  | 96.16                            | 0.89                                                                                                                                                                                                                                                                                                                                                                                                                                                                                                                                                                                                                                                                              | -20.39           | 72.20                  | 0.02                       | -51.38     |                      |                          |  |      |              |                        |                            |            |                      |                          |        |        |      |        |       |      |        |      |       |      |       |       |      |        |       |       |      |        |       |      |        |

| Compound                         | Normalized Values (A and B Sets) | Responses                                                                                                                                                                                                                                                                                                                                                                                                                                                                                                                                                                                                                                                                           |                  |                        |                            |            |                      |                          |  |      |              |                        |                            |            |                      |                          |        |        |      |        |       |      |        |      |        |      |       |       |      |        |       |        |      |        |        |      |       |
|----------------------------------|----------------------------------|-------------------------------------------------------------------------------------------------------------------------------------------------------------------------------------------------------------------------------------------------------------------------------------------------------------------------------------------------------------------------------------------------------------------------------------------------------------------------------------------------------------------------------------------------------------------------------------------------------------------------------------------------------------------------------------|------------------|------------------------|----------------------------|------------|----------------------|--------------------------|--|------|--------------|------------------------|----------------------------|------------|----------------------|--------------------------|--------|--------|------|--------|-------|------|--------|------|--------|------|-------|-------|------|--------|-------|--------|------|--------|--------|------|-------|
| <b>Vardenafil HCl Trihydrate</b> |                                  | <table border="1"> <thead> <tr> <th colspan="7">Average Response</th> </tr> <tr> <th>Dose</th> <th>Green Signal</th> <th>Actual Pct Green Cells</th> <th>Normalized Pct Green Cells</th> <th>Red Signal</th> <th>Actual Pct Red Cells</th> <th>Normalized Pct Red Cells</th> </tr> </thead> <tbody> <tr> <td>0.1 uM</td> <td>110.32</td> <td>0.95</td> <td>156.37</td> <td>87.84</td> <td>0.08</td> <td>-20.23</td> </tr> <tr> <td>1 uM</td> <td>104.18</td> <td>0.88</td> <td>91.48</td> <td>73.37</td> <td>0.03</td> <td>-42.54</td> </tr> <tr> <td>10 uM</td> <td>117.60</td> <td>0.97</td> <td>512.84</td> <td>118.47</td> <td>0.18</td> <td>28.47</td> </tr> </tbody> </table> | Average Response |                        |                            |            |                      |                          |  | Dose | Green Signal | Actual Pct Green Cells | Normalized Pct Green Cells | Red Signal | Actual Pct Red Cells | Normalized Pct Red Cells | 0.1 uM | 110.32 | 0.95 | 156.37 | 87.84 | 0.08 | -20.23 | 1 uM | 104.18 | 0.88 | 91.48 | 73.37 | 0.03 | -42.54 | 10 uM | 117.60 | 0.97 | 512.84 | 118.47 | 0.18 | 28.47 |
|                                  |                                  | Average Response                                                                                                                                                                                                                                                                                                                                                                                                                                                                                                                                                                                                                                                                    |                  |                        |                            |            |                      |                          |  |      |              |                        |                            |            |                      |                          |        |        |      |        |       |      |        |      |        |      |       |       |      |        |       |        |      |        |        |      |       |
|                                  |                                  | Dose                                                                                                                                                                                                                                                                                                                                                                                                                                                                                                                                                                                                                                                                                | Green Signal     | Actual Pct Green Cells | Normalized Pct Green Cells | Red Signal | Actual Pct Red Cells | Normalized Pct Red Cells |  |      |              |                        |                            |            |                      |                          |        |        |      |        |       |      |        |      |        |      |       |       |      |        |       |        |      |        |        |      |       |
|                                  |                                  | 0.1 uM                                                                                                                                                                                                                                                                                                                                                                                                                                                                                                                                                                                                                                                                              | 110.32           | 0.95                   | 156.37                     | 87.84      | 0.08                 | -20.23                   |  |      |              |                        |                            |            |                      |                          |        |        |      |        |       |      |        |      |        |      |       |       |      |        |       |        |      |        |        |      |       |
| 1 uM                             | 104.18                           | 0.88                                                                                                                                                                                                                                                                                                                                                                                                                                                                                                                                                                                                                                                                                | 91.48            | 73.37                  | 0.03                       | -42.54     |                      |                          |  |      |              |                        |                            |            |                      |                          |        |        |      |        |       |      |        |      |        |      |       |       |      |        |       |        |      |        |        |      |       |
| 10 uM                            | 117.60                           | 0.97                                                                                                                                                                                                                                                                                                                                                                                                                                                                                                                                                                                                                                                                                | 512.84           | 118.47                 | 0.18                       | 28.47      |                      |                          |  |      |              |                        |                            |            |                      |                          |        |        |      |        |       |      |        |      |        |      |       |       |      |        |       |        |      |        |        |      |       |

Compound

Normalized Values (A and B Sets)

Responses

| Varenicline Tartrate | Percent Green Cells (AB) |  | Percent Red Cells (AB)  |  | Average Response |              |                        |                            |            |                      |                          |
|----------------------|--------------------------|--|-------------------------|--|------------------|--------------|------------------------|----------------------------|------------|----------------------|--------------------------|
|                      | 100<br>Percent Response  |  | 100<br>Percent Response |  | Dose             | Green Signal | Actual Pct Green Cells | Normalized Pct Green Cells | Red Signal | Actual Pct Red Cells | Normalized Pct Red Cells |
|                      | 0.1 uM 1 uM 10 uM        |  | 0.1 uM 1 uM 10 uM       |  | 0.1 uM           | 109.15       | 0.89                   | 63.12                      | 89.71      | 0.06                 | -42.71                   |
|                      | concentration            |  | concentration           |  | 1 uM             | 102.88       | 0.87                   | 84.76                      | 102.67     | 0.10                 | -12.13                   |
|                      |                          |  |                         |  | 10 uM            | 92.86        | 0.80                   | 47.08                      | 106.57     | 0.09                 | -14.79                   |

Compound

Normalized Values (A and B Sets)

Responses

| Varespladib (LY315920) | Percent Green Cells (AB) |  | Percent Red Cells (AB)  |  | Average Response                                                                               |              |                        |                            |            |                      |                          |
|------------------------|--------------------------|--|-------------------------|--|------------------------------------------------------------------------------------------------|--------------|------------------------|----------------------------|------------|----------------------|--------------------------|
|                        | 100<br>Percent Response  |  | 100<br>Percent Response |  | Dose                                                                                           | Green Signal | Actual Pct Green Cells | Normalized Pct Green Cells | Red Signal | Actual Pct Red Cells | Normalized Pct Red Cells |
|                        | 0.1 uM 1 uM 10 uM        |  | 0.1 uM 1 uM 10 uM       |  | 0.1 uM                                                                                         | 104.17       | 0.90                   | 109.93                     | 100.27     | 0.11                 | -13.92                   |
|                        | concentration            |  | concentration           |  | 1 uM                                                                                           | 98.69        | 0.84                   | 60.11                      | 105.66     | 0.12                 | -4.16                    |
|                        |                          |  |                         |  | 10 uM <td>88.76</td> <td>0.77</td> <td>30.09</td> <td>115.67</td> <td>0.12</td> <td>-5.71</td> | 88.76        | 0.77                   | 30.09                      | 115.67     | 0.12                 | -5.71                    |

Compound

Normalized Values (A and B Sets)

Responses

| Varlitinib | Percent Green Cells (AB) |  | Percent Red Cells (AB)  |  | Average Response                                                                                 |              |                        |                            |            |                      |                          |
|------------|--------------------------|--|-------------------------|--|--------------------------------------------------------------------------------------------------|--------------|------------------------|----------------------------|------------|----------------------|--------------------------|
|            | 100<br>Percent Response  |  | 100<br>Percent Response |  | Dose                                                                                             | Green Signal | Actual Pct Green Cells | Normalized Pct Green Cells | Red Signal | Actual Pct Red Cells | Normalized Pct Red Cells |
|            | 0.1 uM 1 uM 10 uM        |  | 0.1 uM 1 uM 10 uM       |  | 0.1 uM                                                                                           | 95.93        | 0.86                   | 57.60                      | 90.95      | 0.09                 | -12.00                   |
|            | concentration            |  | concentration           |  | 1 uM                                                                                             | 95.91        | 0.80                   | 57.55                      | 86.10      | 0.04                 | -38.13                   |
|            |                          |  |                         |  | 10 uM <td>102.24</td> <td>0.92</td> <td>303.76</td> <td>74.21</td> <td>0.02</td> <td>-49.34</td> | 102.24       | 0.92                   | 303.76                     | 74.21      | 0.02                 | -49.34                   |

Compound

Normalized Values (A and B Sets)

Responses

| Vatalanib (PTK787) 2HCl | Percent Green Cells (AB) |  | Percent Red Cells (AB)  |  | Average Response                                                                                |              |                        |                            |            |                      |                          |
|-------------------------|--------------------------|--|-------------------------|--|-------------------------------------------------------------------------------------------------|--------------|------------------------|----------------------------|------------|----------------------|--------------------------|
|                         | 100<br>Percent Response  |  | 100<br>Percent Response |  | Dose                                                                                            | Green Signal | Actual Pct Green Cells | Normalized Pct Green Cells | Red Signal | Actual Pct Red Cells | Normalized Pct Red Cells |
|                         | 0.1 uM 1 uM 10 uM        |  | 0.1 uM 1 uM 10 uM       |  | 0.1 uM                                                                                          | 100.62       | 0.89                   | 115.19                     | 80.89      | 0.03                 | -59.85                   |
|                         | concentration            |  | concentration           |  | 1 uM                                                                                            | 98.03        | 0.85                   | 64.55                      | 76.92      | 0.02                 | -46.97                   |
|                         |                          |  |                         |  | 10 uM <td>98.77</td> <td>0.88</td> <td>102.96</td> <td>81.96</td> <td>0.02</td> <td>-46.25</td> | 98.77        | 0.88                   | 102.96                     | 81.96      | 0.02                 | -46.25                   |

Compound

Normalized Values (A and B Sets)

Responses

| VE-821 | Percent Green Cells (AB) |  | Percent Red Cells (AB)  |  | Average Response                                                                                |              |                        |                            |            |                      |                          |
|--------|--------------------------|--|-------------------------|--|-------------------------------------------------------------------------------------------------|--------------|------------------------|----------------------------|------------|----------------------|--------------------------|
|        | 100<br>Percent Response  |  | 100<br>Percent Response |  | Dose                                                                                            | Green Signal | Actual Pct Green Cells | Normalized Pct Green Cells | Red Signal | Actual Pct Red Cells | Normalized Pct Red Cells |
|        | 0.1 uM 1 uM 10 uM        |  | 0.1 uM 1 uM 10 uM       |  | 0.1 uM                                                                                          | 89.19        | 0.81                   | 30.64                      | 81.68      | 0.03                 | -54.22                   |
|        | concentration            |  | concentration           |  | 1 uM                                                                                            | 98.93        | 0.84                   | 172.01                     | 78.21      | 0.05                 | -18.23                   |
|        |                          |  |                         |  | 10 uM <td>102.18</td> <td>0.91</td> <td>90.94</td> <td>80.32</td> <td>0.06</td> <td>-25.45</td> | 102.18       | 0.91                   | 90.94                      | 80.32      | 0.06                 | -25.45                   |

Compound

Normalized Values (A and B Sets)

Responses

| Verteporfin | Percent Green Cells (AB) |  | Percent Red Cells (AB) |  | Average Response |              |                        |                            |            |                      |                          |
|-------------|--------------------------|--|------------------------|--|------------------|--------------|------------------------|----------------------------|------------|----------------------|--------------------------|
|             | Percent Response         |  | Percent Response       |  | Dose             | Green Signal | Actual Pct Green Cells | Normalized Pct Green Cells | Red Signal | Actual Pct Red Cells | Normalized Pct Red Cells |
|             | 100                      |  | 100                    |  | 0.1 uM           | 107.18       | 0.89                   | 108.62                     | 101.43     | 0.10                 | -24.48                   |
|             | 0                        |  | 0                      |  | 1 uM             | 100.86       | 0.83                   | 14.80                      | 99.06      | 0.08                 | -19.81                   |
|             | 0.1 uM                   |  | 0.1 uM                 |  | 10 uM            | 93.47        | 0.77                   | 19.23                      | 104.69     | 0.08                 | -22.80                   |
|             | 1 uM                     |  | 1 uM                   |  |                  |              |                        |                            |            |                      |                          |
|             | 10 uM                    |  | 10 uM                  |  |                  |              |                        |                            |            |                      |                          |

Compound

Normalized Values (A and B Sets)

Responses

| Vilazodone HCl | Percent Green Cells (AB) |  | Percent Red Cells (AB) |  | Average Response |              |                        |                            |            |                      |                          |
|----------------|--------------------------|--|------------------------|--|------------------|--------------|------------------------|----------------------------|------------|----------------------|--------------------------|
|                | Percent Response         |  | Percent Response       |  | Dose             | Green Signal | Actual Pct Green Cells | Normalized Pct Green Cells | Red Signal | Actual Pct Red Cells | Normalized Pct Red Cells |
|                | 100                      |  | 100                    |  | 0.1 uM           | 89.04        | 0.83                   | -52.85                     | 79.36      | 0.05                 | -37.09                   |
|                | 0                        |  | 0                      |  | 1 uM             | 100.01       | 0.85                   | 89.37                      | 81.90      | 0.06                 | -39.45                   |
|                | 0.1 uM                   |  | 0.1 uM                 |  | 10 uM            | 114.59       | 0.92                   | 115.28                     | 90.36      | 0.06                 | -32.17                   |
|                | 1 uM                     |  | 1 uM                   |  |                  |              |                        |                            |            |                      |                          |
|                | 10 uM                    |  | 10 uM                  |  |                  |              |                        |                            |            |                      |                          |

Compound

Normalized Values (A and B Sets)

Responses

| Vildagliptin (LAF-237) | Percent Green Cells (AB) |  | Percent Red Cells (AB) |  | Average Response |              |                        |                            |            |                      |                          |
|------------------------|--------------------------|--|------------------------|--|------------------|--------------|------------------------|----------------------------|------------|----------------------|--------------------------|
|                        | Percent Response         |  | Percent Response       |  | Dose             | Green Signal | Actual Pct Green Cells | Normalized Pct Green Cells | Red Signal | Actual Pct Red Cells | Normalized Pct Red Cells |
|                        | 100                      |  | 100                    |  | 0.1 uM           | 90.22        | 0.81                   | 244.25                     | 79.65      | 0.04                 | -41.97                   |
|                        | 0                        |  | 0                      |  | 1 uM             | 93.80        | 0.80                   | 53.92                      | 79.03      | 0.03                 | -49.63                   |
|                        | 0.1 uM                   |  | 0.1 uM                 |  | 10 uM            | 102.21       | 0.88                   | 114.35                     | 91.34      | 0.05                 | -36.77                   |
|                        | 1 uM                     |  | 1 uM                   |  |                  |              |                        |                            |            |                      |                          |
|                        | 10 uM                    |  | 10 uM                  |  |                  |              |                        |                            |            |                      |                          |

Compound

Normalized Values (A and B Sets)

Responses

| Vinblastine | Percent Green Cells (AB) |  | Percent Red Cells (AB) |  | Average Response |              |                        |                            |            |                      |                          |
|-------------|--------------------------|--|------------------------|--|------------------|--------------|------------------------|----------------------------|------------|----------------------|--------------------------|
|             | Percent Response         |  | Percent Response       |  | Dose             | Green Signal | Actual Pct Green Cells | Normalized Pct Green Cells | Red Signal | Actual Pct Red Cells | Normalized Pct Red Cells |
|             | 100                      |  | 100                    |  | 0.1 uM           | 124.48       | 0.93                   | 114.21                     | 97.03      | 0.09                 | -28.85                   |
|             | 0                        |  | 0                      |  | 1 uM             | 111.64       | 0.82                   | 23.10                      | 121.35     | 0.21                 | 38.84                    |
|             | 0.1 uM                   |  | 0.1 uM                 |  | 10 uM            | 112.89       | 0.84                   | 77.93                      | 101.48     | 0.10                 | -13.34                   |
|             | 1 uM                     |  | 1 uM                   |  |                  |              |                        |                            |            |                      |                          |
|             | 10 uM                    |  | 10 uM                  |  |                  |              |                        |                            |            |                      |                          |

Compound

Normalized Values (A and B Sets)

Responses

| Vinflunine Tartrate | Percent Green Cells (AB) |  | Percent Red Cells (AB) |  | Average Response |              |                        |                            |            |                      |                          |
|---------------------|--------------------------|--|------------------------|--|------------------|--------------|------------------------|----------------------------|------------|----------------------|--------------------------|
|                     | Percent Response         |  | Percent Response       |  | Dose             | Green Signal | Actual Pct Green Cells | Normalized Pct Green Cells | Red Signal | Actual Pct Red Cells | Normalized Pct Red Cells |
|                     | 100                      |  | 100                    |  | 0.1 uM           | 108.62       | 0.91                   | 111.82                     | 99.59      | 0.13                 | 6.78                     |
|                     | 0                        |  | 0                      |  | 1 uM             | 92.68        | 0.69                   | -7.43                      | 104.48     | 0.15                 | 10.67                    |
|                     | 0.1 uM                   |  | 0.1 uM                 |  | 10 uM            | 113.88       | 0.89                   | 75.49                      | 115.46     | 0.19                 | 33.31                    |
|                     | 1 uM                     |  | 1 uM                   |  |                  |              |                        |                            |            |                      |                          |
|                     | 10 uM                    |  | 10 uM                  |  |                  |              |                        |                            |            |                      |                          |

Compound

Normalized Values (A and B Sets)

Responses

| Vinorelbine | Percent Green Cells (AB) |      | Percent Red Cells (AB) |        | Average Response |              |                        |                            |            |                      |                          |       |       |
|-------------|--------------------------|------|------------------------|--------|------------------|--------------|------------------------|----------------------------|------------|----------------------|--------------------------|-------|-------|
|             | Percent Response         |      | Percent Response       |        | Dose             | Green Signal | Actual Pct Green Cells | Normalized Pct Green Cells | Red Signal | Actual Pct Red Cells | Normalized Pct Red Cells |       |       |
|             | concentration            |      | concentration          |        | 0.1 uM           | 1 uM         | 10 uM                  | 0.1 uM                     | 1 uM       | 10 uM                | 0.1 uM                   | 1 uM  | 10 uM |
|             | 0.1 uM                   | 1 uM | 10 uM                  | 0.1 uM | 1 uM             | 10 uM        | 0.1 uM                 | 1 uM                       | 10 uM      | 0.1 uM               | 1 uM                     | 10 uM |       |
|             | 100                      | 95   | 65                     | 25     | 0.1 uM           | 115.96       | 0.87                   | 53.59                      | 108.52     | 0.14                 | 2.11                     |       |       |
|             | 75                       | 65   | 65                     | 45     | 1 uM             | 123.92       | 0.84                   | 32.80                      | 120.47     | 0.20                 | 36.12                    |       |       |
|             | 50                       | 25   | 25                     | 25     | 10 uM            | 110.73       | 0.74                   | 14.18                      | 122.19     | 0.21                 | 41.16                    |       |       |

Compound

Normalized Values (A and B Sets)

Responses

| Vitamin B12 | Percent Green Cells (AB) |      | Percent Red Cells (AB) |        | Average Response |              |                        |                            |            |                      |                          |       |       |
|-------------|--------------------------|------|------------------------|--------|------------------|--------------|------------------------|----------------------------|------------|----------------------|--------------------------|-------|-------|
|             | Percent Response         |      | Percent Response       |        | Dose             | Green Signal | Actual Pct Green Cells | Normalized Pct Green Cells | Red Signal | Actual Pct Red Cells | Normalized Pct Red Cells |       |       |
|             | concentration            |      | concentration          |        | 0.1 uM           | 1 uM         | 10 uM                  | 0.1 uM                     | 1 uM       | 10 uM                | 0.1 uM                   | 1 uM  | 10 uM |
|             | 0.1 uM                   | 1 uM | 10 uM                  | 0.1 uM | 1 uM             | 10 uM        | 0.1 uM                 | 1 uM                       | 10 uM      | 0.1 uM               | 1 uM                     | 10 uM |       |
|             | 100                      | 100  | 75                     | 100    | 0.1 uM           | 105.52       | 0.92                   | 123.92                     | 114.70     | 0.17                 | 26.92                    |       |       |
|             | 75                       | 75   | 75                     | 100    | 1 uM             | 101.01       | 0.84                   | 32.91                      | 85.35      | 0.04                 | -41.38                   |       |       |
|             | 50                       | 50   | 50                     | 100    | 10 uM            | 86.34        | 0.70                   | -32.37                     | 102.51     | 0.06                 | -28.33                   |       |       |

Compound

Normalized Values (A and B Sets)

Responses

| Vitamin D2 | Percent Green Cells (AB) |      | Percent Red Cells (AB) |        | Average Response |              |                        |                            |            |                      |                          |       |       |
|------------|--------------------------|------|------------------------|--------|------------------|--------------|------------------------|----------------------------|------------|----------------------|--------------------------|-------|-------|
|            | Percent Response         |      | Percent Response       |        | Dose             | Green Signal | Actual Pct Green Cells | Normalized Pct Green Cells | Red Signal | Actual Pct Red Cells | Normalized Pct Red Cells |       |       |
|            | concentration            |      | concentration          |        | 0.1 uM           | 1 uM         | 10 uM                  | 0.1 uM                     | 1 uM       | 10 uM                | 0.1 uM                   | 1 uM  | 10 uM |
|            | 0.1 uM                   | 1 uM | 10 uM                  | 0.1 uM | 1 uM             | 10 uM        | 0.1 uM                 | 1 uM                       | 10 uM      | 0.1 uM               | 1 uM                     | 10 uM |       |
|            | 100                      | 100  | 100                    | 0      | 0.1 uM           | 83.65        | 0.79                   | -60.94                     | 59.31      | 0.01                 | -58.33                   |       |       |
|            | 75                       | 75   | 75                     | 0      | 1 uM             | 87.20        | 0.76                   | 21.15                      | 76.62      | 0.04                 | -50.03                   |       |       |
|            | 50                       | 50   | 50                     | 0      | 10 uM            | 89.27        | 0.77                   | 64.11                      | 68.74      | 0.02                 | -55.78                   |       |       |

Compound

Normalized Values (A and B Sets)

Responses

| Vitamin D3 | Percent Green Cells (AB) |      | Percent Red Cells (AB) |        | Average Response |              |                        |                            |            |                      |                          |       |       |
|------------|--------------------------|------|------------------------|--------|------------------|--------------|------------------------|----------------------------|------------|----------------------|--------------------------|-------|-------|
|            | Percent Response         |      | Percent Response       |        | Dose             | Green Signal | Actual Pct Green Cells | Normalized Pct Green Cells | Red Signal | Actual Pct Red Cells | Normalized Pct Red Cells |       |       |
|            | concentration            |      | concentration          |        | 0.1 uM           | 1 uM         | 10 uM                  | 0.1 uM                     | 1 uM       | 10 uM                | 0.1 uM                   | 1 uM  | 10 uM |
|            | 0.1 uM                   | 1 uM | 10 uM                  | 0.1 uM | 1 uM             | 10 uM        | 0.1 uM                 | 1 uM                       | 10 uM      | 0.1 uM               | 1 uM                     | 10 uM |       |
|            | 100                      | 60   | 100                    | 0      | 0.1 uM           | 98.26        | 0.89                   | 179.29                     | 60.90      | 0.02                 | -55.06                   |       |       |
|            | 75                       | 35   | 35                     | 0      | 1 uM             | 88.65        | 0.79                   | 46.33                      | 80.77      | 0.03                 | -52.03                   |       |       |
|            | 50                       | 90   | 90                     | 0      | 10 uM            | 97.52        | 0.85                   | 64.54                      | 83.15      | 0.04                 | -40.57                   |       |       |

Compound

Normalized Values (A and B Sets)

Responses

| Voglibose | Percent Green Cells (AB) |      | Percent Red Cells (AB) |        | Average Response |              |                        |                            |            |                      |                          |       |       |
|-----------|--------------------------|------|------------------------|--------|------------------|--------------|------------------------|----------------------------|------------|----------------------|--------------------------|-------|-------|
|           | Percent Response         |      | Percent Response       |        | Dose             | Green Signal | Actual Pct Green Cells | Normalized Pct Green Cells | Red Signal | Actual Pct Red Cells | Normalized Pct Red Cells |       |       |
|           | concentration            |      | concentration          |        | 0.1 uM           | 1 uM         | 10 uM                  | 0.1 uM                     | 1 uM       | 10 uM                | 0.1 uM                   | 1 uM  | 10 uM |
|           | 0.1 uM                   | 1 uM | 10 uM                  | 0.1 uM | 1 uM             | 10 uM        | 0.1 uM                 | 1 uM                       | 10 uM      | 0.1 uM               | 1 uM                     | 10 uM |       |
|           | 100                      | 10   | 35                     | 0      | 0.1 uM           | 85.20        | 0.81                   | -40.00                     | 71.14      | 0.02                 | -51.53                   |       |       |
|           | 75                       | 35   | 35                     | 0      | 1 uM             | 88.61        | 0.73                   | 9.23                       | 81.05      | 0.04                 | -46.68                   |       |       |
|           | 50                       | 75   | 75                     | 0      | 10 uM            | 92.65        | 0.80                   | 9.39                       | 94.50      | 0.10                 | -13.74                   |       |       |

| Compound                    | Normalized Values (A and B Sets) | Responses                                                                                                                                                                                                                                                                                                                                                                                                                                                                                                                                                                                                                                                                       |                  |                        |                            |            |                      |                          |  |      |              |                        |                            |            |                      |                          |        |        |      |       |       |      |      |      |        |      |       |        |      |      |       |        |      |        |       |      |        |
|-----------------------------|----------------------------------|---------------------------------------------------------------------------------------------------------------------------------------------------------------------------------------------------------------------------------------------------------------------------------------------------------------------------------------------------------------------------------------------------------------------------------------------------------------------------------------------------------------------------------------------------------------------------------------------------------------------------------------------------------------------------------|------------------|------------------------|----------------------------|------------|----------------------|--------------------------|--|------|--------------|------------------------|----------------------------|------------|----------------------|--------------------------|--------|--------|------|-------|-------|------|------|------|--------|------|-------|--------|------|------|-------|--------|------|--------|-------|------|--------|
| <b>Volasertib (BI 6727)</b> |                                  | <table border="1"> <thead> <tr> <th colspan="7">Average Response</th> </tr> <tr> <th>Dose</th> <th>Green Signal</th> <th>Actual Pct Green Cells</th> <th>Normalized Pct Green Cells</th> <th>Red Signal</th> <th>Actual Pct Red Cells</th> <th>Normalized Pct Red Cells</th> </tr> </thead> <tbody> <tr> <td>0.1 uM</td> <td>105.22</td> <td>0.82</td> <td>24.17</td> <td>95.97</td> <td>0.12</td> <td>0.07</td> </tr> <tr> <td>1 uM</td> <td>104.05</td> <td>0.79</td> <td>52.68</td> <td>108.69</td> <td>0.13</td> <td>1.37</td> </tr> <tr> <td>10 uM</td> <td>101.72</td> <td>0.81</td> <td>103.81</td> <td>96.00</td> <td>0.09</td> <td>-15.00</td> </tr> </tbody> </table> | Average Response |                        |                            |            |                      |                          |  | Dose | Green Signal | Actual Pct Green Cells | Normalized Pct Green Cells | Red Signal | Actual Pct Red Cells | Normalized Pct Red Cells | 0.1 uM | 105.22 | 0.82 | 24.17 | 95.97 | 0.12 | 0.07 | 1 uM | 104.05 | 0.79 | 52.68 | 108.69 | 0.13 | 1.37 | 10 uM | 101.72 | 0.81 | 103.81 | 96.00 | 0.09 | -15.00 |
|                             |                                  | Average Response                                                                                                                                                                                                                                                                                                                                                                                                                                                                                                                                                                                                                                                                |                  |                        |                            |            |                      |                          |  |      |              |                        |                            |            |                      |                          |        |        |      |       |       |      |      |      |        |      |       |        |      |      |       |        |      |        |       |      |        |
|                             |                                  | Dose                                                                                                                                                                                                                                                                                                                                                                                                                                                                                                                                                                                                                                                                            | Green Signal     | Actual Pct Green Cells | Normalized Pct Green Cells | Red Signal | Actual Pct Red Cells | Normalized Pct Red Cells |  |      |              |                        |                            |            |                      |                          |        |        |      |       |       |      |      |      |        |      |       |        |      |      |       |        |      |        |       |      |        |
|                             |                                  | 0.1 uM                                                                                                                                                                                                                                                                                                                                                                                                                                                                                                                                                                                                                                                                          | 105.22           | 0.82                   | 24.17                      | 95.97      | 0.12                 | 0.07                     |  |      |              |                        |                            |            |                      |                          |        |        |      |       |       |      |      |      |        |      |       |        |      |      |       |        |      |        |       |      |        |
| 1 uM                        | 104.05                           | 0.79                                                                                                                                                                                                                                                                                                                                                                                                                                                                                                                                                                                                                                                                            | 52.68            | 108.69                 | 0.13                       | 1.37       |                      |                          |  |      |              |                        |                            |            |                      |                          |        |        |      |       |       |      |      |      |        |      |       |        |      |      |       |        |      |        |       |      |        |
| 10 uM                       | 101.72                           | 0.81                                                                                                                                                                                                                                                                                                                                                                                                                                                                                                                                                                                                                                                                            | 103.81           | 96.00                  | 0.09                       | -15.00     |                      |                          |  |      |              |                        |                            |            |                      |                          |        |        |      |       |       |      |      |      |        |      |       |        |      |      |       |        |      |        |       |      |        |

| Compound                         | Normalized Values (A and B Sets) | Responses                                                                                                                                                                                                                                                                                                                                                                                                                                                                                                                                                                                                                                                                      |                  |                        |                            |            |                      |                          |  |      |              |                        |                            |            |                      |                          |        |       |      |       |       |      |        |      |       |      |       |       |      |        |       |       |      |       |        |      |       |
|----------------------------------|----------------------------------|--------------------------------------------------------------------------------------------------------------------------------------------------------------------------------------------------------------------------------------------------------------------------------------------------------------------------------------------------------------------------------------------------------------------------------------------------------------------------------------------------------------------------------------------------------------------------------------------------------------------------------------------------------------------------------|------------------|------------------------|----------------------------|------------|----------------------|--------------------------|--|------|--------------|------------------------|----------------------------|------------|----------------------|--------------------------|--------|-------|------|-------|-------|------|--------|------|-------|------|-------|-------|------|--------|-------|-------|------|-------|--------|------|-------|
| <b>Vorinostat (SAHA, MK0683)</b> |                                  | <table border="1"> <thead> <tr> <th colspan="7">Average Response</th> </tr> <tr> <th>Dose</th> <th>Green Signal</th> <th>Actual Pct Green Cells</th> <th>Normalized Pct Green Cells</th> <th>Red Signal</th> <th>Actual Pct Red Cells</th> <th>Normalized Pct Red Cells</th> </tr> </thead> <tbody> <tr> <td>0.1 uM</td> <td>91.03</td> <td>0.77</td> <td>-5.19</td> <td>74.77</td> <td>0.03</td> <td>-55.61</td> </tr> <tr> <td>1 uM</td> <td>92.30</td> <td>0.86</td> <td>62.86</td> <td>55.82</td> <td>0.02</td> <td>-40.27</td> </tr> <tr> <td>10 uM</td> <td>98.53</td> <td>0.85</td> <td>34.38</td> <td>101.94</td> <td>0.15</td> <td>12.94</td> </tr> </tbody> </table> | Average Response |                        |                            |            |                      |                          |  | Dose | Green Signal | Actual Pct Green Cells | Normalized Pct Green Cells | Red Signal | Actual Pct Red Cells | Normalized Pct Red Cells | 0.1 uM | 91.03 | 0.77 | -5.19 | 74.77 | 0.03 | -55.61 | 1 uM | 92.30 | 0.86 | 62.86 | 55.82 | 0.02 | -40.27 | 10 uM | 98.53 | 0.85 | 34.38 | 101.94 | 0.15 | 12.94 |
|                                  |                                  | Average Response                                                                                                                                                                                                                                                                                                                                                                                                                                                                                                                                                                                                                                                               |                  |                        |                            |            |                      |                          |  |      |              |                        |                            |            |                      |                          |        |       |      |       |       |      |        |      |       |      |       |       |      |        |       |       |      |       |        |      |       |
|                                  |                                  | Dose                                                                                                                                                                                                                                                                                                                                                                                                                                                                                                                                                                                                                                                                           | Green Signal     | Actual Pct Green Cells | Normalized Pct Green Cells | Red Signal | Actual Pct Red Cells | Normalized Pct Red Cells |  |      |              |                        |                            |            |                      |                          |        |       |      |       |       |      |        |      |       |      |       |       |      |        |       |       |      |       |        |      |       |
|                                  |                                  | 0.1 uM                                                                                                                                                                                                                                                                                                                                                                                                                                                                                                                                                                                                                                                                         | 91.03            | 0.77                   | -5.19                      | 74.77      | 0.03                 | -55.61                   |  |      |              |                        |                            |            |                      |                          |        |       |      |       |       |      |        |      |       |      |       |       |      |        |       |       |      |       |        |      |       |
| 1 uM                             | 92.30                            | 0.86                                                                                                                                                                                                                                                                                                                                                                                                                                                                                                                                                                                                                                                                           | 62.86            | 55.82                  | 0.02                       | -40.27     |                      |                          |  |      |              |                        |                            |            |                      |                          |        |       |      |       |       |      |        |      |       |      |       |       |      |        |       |       |      |       |        |      |       |
| 10 uM                            | 98.53                            | 0.85                                                                                                                                                                                                                                                                                                                                                                                                                                                                                                                                                                                                                                                                           | 34.38            | 101.94                 | 0.15                       | 12.94      |                      |                          |  |      |              |                        |                            |            |                      |                          |        |       |      |       |       |      |        |      |       |      |       |       |      |        |       |       |      |       |        |      |       |

| Compound                             | Normalized Values (A and B Sets) | Responses                                                                                                                                                                                                                                                                                                                                                                                                                                                                                                                                                                                                                                                                        |                  |                        |                            |            |                      |                          |  |      |              |                        |                            |            |                      |                          |        |       |      |      |       |      |        |      |       |      |        |       |      |        |       |        |      |        |        |      |       |
|--------------------------------------|----------------------------------|----------------------------------------------------------------------------------------------------------------------------------------------------------------------------------------------------------------------------------------------------------------------------------------------------------------------------------------------------------------------------------------------------------------------------------------------------------------------------------------------------------------------------------------------------------------------------------------------------------------------------------------------------------------------------------|------------------|------------------------|----------------------------|------------|----------------------|--------------------------|--|------|--------------|------------------------|----------------------------|------------|----------------------|--------------------------|--------|-------|------|------|-------|------|--------|------|-------|------|--------|-------|------|--------|-------|--------|------|--------|--------|------|-------|
| <b>Vortioxetine (Lu AA21004) HBr</b> |                                  | <table border="1"> <thead> <tr> <th colspan="7">Average Response</th> </tr> <tr> <th>Dose</th> <th>Green Signal</th> <th>Actual Pct Green Cells</th> <th>Normalized Pct Green Cells</th> <th>Red Signal</th> <th>Actual Pct Red Cells</th> <th>Normalized Pct Red Cells</th> </tr> </thead> <tbody> <tr> <td>0.1 uM</td> <td>84.79</td> <td>0.78</td> <td>8.69</td> <td>81.07</td> <td>0.03</td> <td>-56.09</td> </tr> <tr> <td>1 uM</td> <td>80.38</td> <td>0.74</td> <td>285.58</td> <td>84.39</td> <td>0.04</td> <td>-23.44</td> </tr> <tr> <td>10 uM</td> <td>121.18</td> <td>0.93</td> <td>110.69</td> <td>109.34</td> <td>0.19</td> <td>34.70</td> </tr> </tbody> </table> | Average Response |                        |                            |            |                      |                          |  | Dose | Green Signal | Actual Pct Green Cells | Normalized Pct Green Cells | Red Signal | Actual Pct Red Cells | Normalized Pct Red Cells | 0.1 uM | 84.79 | 0.78 | 8.69 | 81.07 | 0.03 | -56.09 | 1 uM | 80.38 | 0.74 | 285.58 | 84.39 | 0.04 | -23.44 | 10 uM | 121.18 | 0.93 | 110.69 | 109.34 | 0.19 | 34.70 |
|                                      |                                  | Average Response                                                                                                                                                                                                                                                                                                                                                                                                                                                                                                                                                                                                                                                                 |                  |                        |                            |            |                      |                          |  |      |              |                        |                            |            |                      |                          |        |       |      |      |       |      |        |      |       |      |        |       |      |        |       |        |      |        |        |      |       |
|                                      |                                  | Dose                                                                                                                                                                                                                                                                                                                                                                                                                                                                                                                                                                                                                                                                             | Green Signal     | Actual Pct Green Cells | Normalized Pct Green Cells | Red Signal | Actual Pct Red Cells | Normalized Pct Red Cells |  |      |              |                        |                            |            |                      |                          |        |       |      |      |       |      |        |      |       |      |        |       |      |        |       |        |      |        |        |      |       |
|                                      |                                  | 0.1 uM                                                                                                                                                                                                                                                                                                                                                                                                                                                                                                                                                                                                                                                                           | 84.79            | 0.78                   | 8.69                       | 81.07      | 0.03                 | -56.09                   |  |      |              |                        |                            |            |                      |                          |        |       |      |      |       |      |        |      |       |      |        |       |      |        |       |        |      |        |        |      |       |
| 1 uM                                 | 80.38                            | 0.74                                                                                                                                                                                                                                                                                                                                                                                                                                                                                                                                                                                                                                                                             | 285.58           | 84.39                  | 0.04                       | -23.44     |                      |                          |  |      |              |                        |                            |            |                      |                          |        |       |      |      |       |      |        |      |       |      |        |       |      |        |       |        |      |        |        |      |       |
| 10 uM                                | 121.18                           | 0.93                                                                                                                                                                                                                                                                                                                                                                                                                                                                                                                                                                                                                                                                             | 110.69           | 109.34                 | 0.19                       | 34.70      |                      |                          |  |      |              |                        |                            |            |                      |                          |        |       |      |      |       |      |        |      |       |      |        |       |      |        |       |        |      |        |        |      |       |

| Compound          | Normalized Values (A and B Sets) | Responses                                                                                                                                                                                                                                                                                                                                                                                                                                                                                                                                                                                                                                                                      |                  |                        |                            |            |                      |                          |  |      |              |                        |                            |            |                      |                          |        |       |      |      |       |      |       |      |        |      |       |        |      |      |       |        |      |        |        |      |       |
|-------------------|----------------------------------|--------------------------------------------------------------------------------------------------------------------------------------------------------------------------------------------------------------------------------------------------------------------------------------------------------------------------------------------------------------------------------------------------------------------------------------------------------------------------------------------------------------------------------------------------------------------------------------------------------------------------------------------------------------------------------|------------------|------------------------|----------------------------|------------|----------------------|--------------------------|--|------|--------------|------------------------|----------------------------|------------|----------------------|--------------------------|--------|-------|------|------|-------|------|-------|------|--------|------|-------|--------|------|------|-------|--------|------|--------|--------|------|-------|
| <b>VU 0357121</b> |                                  | <table border="1"> <thead> <tr> <th colspan="7">Average Response</th> </tr> <tr> <th>Dose</th> <th>Green Signal</th> <th>Actual Pct Green Cells</th> <th>Normalized Pct Green Cells</th> <th>Red Signal</th> <th>Actual Pct Red Cells</th> <th>Normalized Pct Red Cells</th> </tr> </thead> <tbody> <tr> <td>0.1 uM</td> <td>89.78</td> <td>0.81</td> <td>6.98</td> <td>97.27</td> <td>0.11</td> <td>-3.72</td> </tr> <tr> <td>1 uM</td> <td>107.42</td> <td>0.89</td> <td>97.40</td> <td>102.79</td> <td>0.13</td> <td>0.46</td> </tr> <tr> <td>10 uM</td> <td>105.08</td> <td>0.94</td> <td>355.87</td> <td>106.64</td> <td>0.15</td> <td>10.87</td> </tr> </tbody> </table> | Average Response |                        |                            |            |                      |                          |  | Dose | Green Signal | Actual Pct Green Cells | Normalized Pct Green Cells | Red Signal | Actual Pct Red Cells | Normalized Pct Red Cells | 0.1 uM | 89.78 | 0.81 | 6.98 | 97.27 | 0.11 | -3.72 | 1 uM | 107.42 | 0.89 | 97.40 | 102.79 | 0.13 | 0.46 | 10 uM | 105.08 | 0.94 | 355.87 | 106.64 | 0.15 | 10.87 |
|                   |                                  | Average Response                                                                                                                                                                                                                                                                                                                                                                                                                                                                                                                                                                                                                                                               |                  |                        |                            |            |                      |                          |  |      |              |                        |                            |            |                      |                          |        |       |      |      |       |      |       |      |        |      |       |        |      |      |       |        |      |        |        |      |       |
|                   |                                  | Dose                                                                                                                                                                                                                                                                                                                                                                                                                                                                                                                                                                                                                                                                           | Green Signal     | Actual Pct Green Cells | Normalized Pct Green Cells | Red Signal | Actual Pct Red Cells | Normalized Pct Red Cells |  |      |              |                        |                            |            |                      |                          |        |       |      |      |       |      |       |      |        |      |       |        |      |      |       |        |      |        |        |      |       |
|                   |                                  | 0.1 uM                                                                                                                                                                                                                                                                                                                                                                                                                                                                                                                                                                                                                                                                         | 89.78            | 0.81                   | 6.98                       | 97.27      | 0.11                 | -3.72                    |  |      |              |                        |                            |            |                      |                          |        |       |      |      |       |      |       |      |        |      |       |        |      |      |       |        |      |        |        |      |       |
| 1 uM              | 107.42                           | 0.89                                                                                                                                                                                                                                                                                                                                                                                                                                                                                                                                                                                                                                                                           | 97.40            | 102.79                 | 0.13                       | 0.46       |                      |                          |  |      |              |                        |                            |            |                      |                          |        |       |      |      |       |      |       |      |        |      |       |        |      |      |       |        |      |        |        |      |       |
| 10 uM             | 105.08                           | 0.94                                                                                                                                                                                                                                                                                                                                                                                                                                                                                                                                                                                                                                                                           | 355.87           | 106.64                 | 0.15                       | 10.87      |                      |                          |  |      |              |                        |                            |            |                      |                          |        |       |      |      |       |      |       |      |        |      |       |        |      |      |       |        |      |        |        |      |       |

| Compound          | Normalized Values (A and B Sets) | Responses                                                                                                                                                                                                                                                                                                                                                                                                                                                                                                                                                                                                                                                                        |                  |                        |                            |            |                      |                          |  |      |              |                        |                            |            |                      |                          |        |       |      |        |       |      |        |      |       |      |       |       |      |        |       |       |      |        |       |      |        |
|-------------------|----------------------------------|----------------------------------------------------------------------------------------------------------------------------------------------------------------------------------------------------------------------------------------------------------------------------------------------------------------------------------------------------------------------------------------------------------------------------------------------------------------------------------------------------------------------------------------------------------------------------------------------------------------------------------------------------------------------------------|------------------|------------------------|----------------------------|------------|----------------------|--------------------------|--|------|--------------|------------------------|----------------------------|------------|----------------------|--------------------------|--------|-------|------|--------|-------|------|--------|------|-------|------|-------|-------|------|--------|-------|-------|------|--------|-------|------|--------|
| <b>VU 0361737</b> |                                  | <table border="1"> <thead> <tr> <th colspan="7">Average Response</th> </tr> <tr> <th>Dose</th> <th>Green Signal</th> <th>Actual Pct Green Cells</th> <th>Normalized Pct Green Cells</th> <th>Red Signal</th> <th>Actual Pct Red Cells</th> <th>Normalized Pct Red Cells</th> </tr> </thead> <tbody> <tr> <td>0.1 uM</td> <td>98.75</td> <td>0.93</td> <td>117.61</td> <td>77.23</td> <td>0.02</td> <td>-52.31</td> </tr> <tr> <td>1 uM</td> <td>90.98</td> <td>0.80</td> <td>56.69</td> <td>78.50</td> <td>0.04</td> <td>-48.52</td> </tr> <tr> <td>10 uM</td> <td>85.72</td> <td>0.73</td> <td>-25.60</td> <td>96.01</td> <td>0.09</td> <td>-18.31</td> </tr> </tbody> </table> | Average Response |                        |                            |            |                      |                          |  | Dose | Green Signal | Actual Pct Green Cells | Normalized Pct Green Cells | Red Signal | Actual Pct Red Cells | Normalized Pct Red Cells | 0.1 uM | 98.75 | 0.93 | 117.61 | 77.23 | 0.02 | -52.31 | 1 uM | 90.98 | 0.80 | 56.69 | 78.50 | 0.04 | -48.52 | 10 uM | 85.72 | 0.73 | -25.60 | 96.01 | 0.09 | -18.31 |
|                   |                                  | Average Response                                                                                                                                                                                                                                                                                                                                                                                                                                                                                                                                                                                                                                                                 |                  |                        |                            |            |                      |                          |  |      |              |                        |                            |            |                      |                          |        |       |      |        |       |      |        |      |       |      |       |       |      |        |       |       |      |        |       |      |        |
|                   |                                  | Dose                                                                                                                                                                                                                                                                                                                                                                                                                                                                                                                                                                                                                                                                             | Green Signal     | Actual Pct Green Cells | Normalized Pct Green Cells | Red Signal | Actual Pct Red Cells | Normalized Pct Red Cells |  |      |              |                        |                            |            |                      |                          |        |       |      |        |       |      |        |      |       |      |       |       |      |        |       |       |      |        |       |      |        |
|                   |                                  | 0.1 uM                                                                                                                                                                                                                                                                                                                                                                                                                                                                                                                                                                                                                                                                           | 98.75            | 0.93                   | 117.61                     | 77.23      | 0.02                 | -52.31                   |  |      |              |                        |                            |            |                      |                          |        |       |      |        |       |      |        |      |       |      |       |       |      |        |       |       |      |        |       |      |        |
| 1 uM              | 90.98                            | 0.80                                                                                                                                                                                                                                                                                                                                                                                                                                                                                                                                                                                                                                                                             | 56.69            | 78.50                  | 0.04                       | -48.52     |                      |                          |  |      |              |                        |                            |            |                      |                          |        |       |      |        |       |      |        |      |       |      |       |       |      |        |       |       |      |        |       |      |        |
| 10 uM             | 85.72                            | 0.73                                                                                                                                                                                                                                                                                                                                                                                                                                                                                                                                                                                                                                                                             | -25.60           | 96.01                  | 0.09                       | -18.31     |                      |                          |  |      |              |                        |                            |            |                      |                          |        |       |      |        |       |      |        |      |       |      |       |       |      |        |       |       |      |        |       |      |        |

Compound

Normalized Values (A and B Sets)

Responses

| VU 0364439 | Percent Green Cells (AB) |  | Percent Red Cells (AB) |  | Average Response |              |                        |                            |            |                      |                          |
|------------|--------------------------|--|------------------------|--|------------------|--------------|------------------------|----------------------------|------------|----------------------|--------------------------|
|            | Percent Response         |  | Percent Response       |  | Dose             | Green Signal | Actual Pct Green Cells | Normalized Pct Green Cells | Red Signal | Actual Pct Red Cells | Normalized Pct Red Cells |
|            | 0.1 uM 1 uM 10 uM        |  | 0.1 uM 1 uM 10 uM      |  | 0.1 uM           | 77.30        | 0.66                   | -88.11                     | 73.51      | 0.02                 | -61.68                   |
|            | concentration            |  | concentration          |  | 1 uM             | 103.53       | 0.92                   | 235.24                     | 79.89      | 0.03                 | -34.52                   |
|            |                          |  |                        |  | 10 uM            | 78.30        | 0.74                   | -63.16                     | 88.22      | 0.07                 | -19.98                   |

Compound

Normalized Values (A and B Sets)

Responses

| VU 0364770 | Percent Green Cells (AB) |  | Percent Red Cells (AB) |  | Average Response                                                                                |              |                        |                            |            |                      |                          |
|------------|--------------------------|--|------------------------|--|-------------------------------------------------------------------------------------------------|--------------|------------------------|----------------------------|------------|----------------------|--------------------------|
|            | Percent Response         |  | Percent Response       |  | Dose                                                                                            | Green Signal | Actual Pct Green Cells | Normalized Pct Green Cells | Red Signal | Actual Pct Red Cells | Normalized Pct Red Cells |
|            | 0.1 uM 1 uM 10 uM        |  | 0.1 uM 1 uM 10 uM      |  | 0.1 uM                                                                                          | 89.84        | 0.87                   | 0.51                       | 65.50      | 0.01                 | -56.54                   |
|            | concentration            |  | concentration          |  | 1 uM                                                                                            | 86.62        | 0.79                   | 48.23                      | 69.73      | 0.01                 | -62.02                   |
|            |                          |  |                        |  | 10 uM <td>79.18</td> <td>0.65</td> <td>143.81</td> <td>98.19</td> <td>0.07</td> <td>-24.89</td> | 79.18        | 0.65                   | 143.81                     | 98.19      | 0.07                 | -24.89                   |

Compound

Normalized Values (A and B Sets)

Responses

| VUF 10166 | Percent Green Cells (AB) |  | Percent Red Cells (AB) |  | Average Response                                                                                |              |                        |                            |            |                      |                          |
|-----------|--------------------------|--|------------------------|--|-------------------------------------------------------------------------------------------------|--------------|------------------------|----------------------------|------------|----------------------|--------------------------|
|           | Percent Response         |  | Percent Response       |  | Dose                                                                                            | Green Signal | Actual Pct Green Cells | Normalized Pct Green Cells | Red Signal | Actual Pct Red Cells | Normalized Pct Red Cells |
|           | 0.1 uM 1 uM 10 uM        |  | 0.1 uM 1 uM 10 uM      |  | 0.1 uM                                                                                          | 77.21        | 0.70                   | 33.39                      | 63.24      | 0.01                 | -61.04                   |
|           | concentration            |  | concentration          |  | 1 uM                                                                                            | 78.96        | 0.63                   | -65.59                     | 83.15      | 0.05                 | -43.02                   |
|           |                          |  |                        |  | 10 uM <th>82.71</th> <th>0.72</th> <th>-69.79</th> <th>71.86</th> <th>0.02</th> <th>-52.10</th> | 82.71        | 0.72                   | -69.79                     | 71.86      | 0.02                 | -52.10                   |

Compound

Normalized Values (A and B Sets)

Responses

| VX-222 (VCH-222, Lomibuvir) | Percent Green Cells (AB) |  | Percent Red Cells (AB) |  | Average Response                                                                                |              |                        |                            |            |                      |                          |
|-----------------------------|--------------------------|--|------------------------|--|-------------------------------------------------------------------------------------------------|--------------|------------------------|----------------------------|------------|----------------------|--------------------------|
|                             | Percent Response         |  | Percent Response       |  | Dose                                                                                            | Green Signal | Actual Pct Green Cells | Normalized Pct Green Cells | Red Signal | Actual Pct Red Cells | Normalized Pct Red Cells |
|                             | 0.1 uM 1 uM 10 uM        |  | 0.1 uM 1 uM 10 uM      |  | 0.1 uM                                                                                          | 98.02        | 0.88                   | 73.42                      | 119.18     | 0.17                 | 8.37                     |
|                             | concentration            |  | concentration          |  | 1 uM                                                                                            | 103.41       | 0.85                   | 42.24                      | 88.53      | 0.05                 | -32.98                   |
|                             |                          |  |                        |  | 10 uM <th>96.81</th> <th>0.82</th> <th>70.14</th> <th>106.86</th> <th>0.07</th> <th>-22.81</th> | 96.81        | 0.82                   | 70.14                      | 106.86     | 0.07                 | -22.81                   |

Compound

Normalized Values (A and B Sets)

Responses

| VX-661 | Percent Green Cells (AB) |  | Percent Red Cells (AB) |  | Average Response                                                                                 |              |                        |                            |            |                      |                          |
|--------|--------------------------|--|------------------------|--|--------------------------------------------------------------------------------------------------|--------------|------------------------|----------------------------|------------|----------------------|--------------------------|
|        | Percent Response         |  | Percent Response       |  | Dose                                                                                             | Green Signal | Actual Pct Green Cells | Normalized Pct Green Cells | Red Signal | Actual Pct Red Cells | Normalized Pct Red Cells |
|        | 0.1 uM 1 uM 10 uM        |  | 0.1 uM 1 uM 10 uM      |  | 0.1 uM                                                                                           | 96.54        | 0.90                   | 81.01                      | 90.32      | 0.09                 | -18.74                   |
|        | concentration            |  | concentration          |  | 1 uM                                                                                             | 99.07        | 0.83                   | 78.17                      | 89.23      | 0.06                 | -35.06                   |
|        |                          |  |                        |  | 10 uM <th>101.26</th> <th>0.90</th> <th>133.77</th> <th>95.44</th> <th>0.08</th> <th>-17.35</th> | 101.26       | 0.90                   | 133.77                     | 95.44      | 0.08                 | -17.35                   |



Compound

Normalized Values (A and B Sets)

Responses

| VX-745 | Percent Green Cells (AB) |  | Percent Red Cells (AB) |  | Average Response |              |                        |                            |            |                      |                          |
|--------|--------------------------|--|------------------------|--|------------------|--------------|------------------------|----------------------------|------------|----------------------|--------------------------|
|        | Percent Response         |  | Percent Response       |  | Dose             | Green Signal | Actual Pct Green Cells | Normalized Pct Green Cells | Red Signal | Actual Pct Red Cells | Normalized Pct Red Cells |
|        | 100                      |  | 100                    |  | 0.1 uM           | 90.36        | 0.83                   | 43.88                      | 115.55     | 0.16                 | 26.00                    |
|        | 0                        |  | 0                      |  | 1 uM             | 84.06        | 0.74                   | 614.67                     | 92.61      | 0.09                 | -2.25                    |
|        |                          |  |                        |  | 10 uM            | 79.35        | 0.71                   | 104.07                     | 90.88      | 0.07                 | -19.14                   |

Compound

Normalized Values (A and B Sets)

Responses

| VX-765 | Percent Green Cells (AB) |  | Percent Red Cells (AB) |  | Average Response |              |                        |                            |            |                      |                          |
|--------|--------------------------|--|------------------------|--|------------------|--------------|------------------------|----------------------------|------------|----------------------|--------------------------|
|        | Percent Response         |  | Percent Response       |  | Dose             | Green Signal | Actual Pct Green Cells | Normalized Pct Green Cells | Red Signal | Actual Pct Red Cells | Normalized Pct Red Cells |
|        | 100                      |  | 100                    |  | 0.1 uM           | 82.23        | 0.75                   | -36.43                     | 80.72      | 0.04                 | -36.86                   |
|        | 0                        |  | 0                      |  | 1 uM             | 94.74        | 0.81                   | 61.32                      | 70.28      | 0.01                 | -49.76                   |
|        |                          |  |                        |  | 10 uM            | 97.33        | 0.88                   | 51.44                      | 85.89      | 0.04                 | -38.35                   |

Compound

Normalized Values (A and B Sets)

Responses

| VX-809 (Lumacaftor) | Percent Green Cells (AB) |  | Percent Red Cells (AB) |  | Average Response |              |                        |                            |            |                      |                          |
|---------------------|--------------------------|--|------------------------|--|------------------|--------------|------------------------|----------------------------|------------|----------------------|--------------------------|
|                     | Percent Response         |  | Percent Response       |  | Dose             | Green Signal | Actual Pct Green Cells | Normalized Pct Green Cells | Red Signal | Actual Pct Red Cells | Normalized Pct Red Cells |
|                     | 100                      |  | 100                    |  | 0.1 uM           | 113.88       | 0.95                   | 149.75                     | 97.66      | 0.09                 | -30.47                   |
|                     | 0                        |  | 0                      |  | 1 uM             | 101.45       | 0.84                   | 64.05                      | 85.71      | 0.03                 | -42.18                   |
|                     |                          |  |                        |  | 10 uM            | 116.23       | 0.89                   | 108.90                     | 104.81     | 0.09                 | -17.96                   |

Compound

Normalized Values (A and B Sets)

Responses

| WAY-600 | Percent Green Cells (AB) |  | Percent Red Cells (AB) |  | Average Response |              |                        |                            |            |                      |                          |
|---------|--------------------------|--|------------------------|--|------------------|--------------|------------------------|----------------------------|------------|----------------------|--------------------------|
|         | Percent Response         |  | Percent Response       |  | Dose             | Green Signal | Actual Pct Green Cells | Normalized Pct Green Cells | Red Signal | Actual Pct Red Cells | Normalized Pct Red Cells |
|         | 100                      |  | 100                    |  | 0.1 uM           | 94.73        | 0.89                   | 95.97                      | 123.68     | 0.23                 | 54.46                    |
|         | 0                        |  | 0                      |  | 1 uM             | 92.57        | 0.77                   | 50.67                      | 62.67      | 0.02                 | -47.67                   |
|         |                          |  |                        |  | 10 uM            | 108.01       | 0.91                   | -22.29                     | 79.23      | 0.03                 | -42.52                   |

Compound

Normalized Values (A and B Sets)

Responses

| WAY-100635 Maleate | Percent Green Cells (AB) |  | Percent Red Cells (AB) |  | Average Response |              |                        |                            |            |                      |                          |
|--------------------|--------------------------|--|------------------------|--|------------------|--------------|------------------------|----------------------------|------------|----------------------|--------------------------|
|                    | Percent Response         |  | Percent Response       |  | Dose             | Green Signal | Actual Pct Green Cells | Normalized Pct Green Cells | Red Signal | Actual Pct Red Cells | Normalized Pct Red Cells |
|                    | 100                      |  | 100                    |  | 0.1 uM           | 98.20        | 0.84                   | 35.95                      | 86.23      | 0.05                 | -30.04                   |
|                    | 0                        |  | 0                      |  | 1 uM             | 84.44        | 0.70                   | -13.18                     | 75.86      | 0.02                 | -47.24                   |
|                    |                          |  |                        |  | 10 uM            | 97.76        | 0.90                   | 228.65                     | 94.81      | 0.06                 | -30.01                   |



Compound

Normalized Values (A and B Sets)

Responses

| WHI-P154 | Percent Green Cells (AB) |      | Percent Red Cells (AB) |        | Average Response |              |                        |                            |            |                      |                          |       |       |
|----------|--------------------------|------|------------------------|--------|------------------|--------------|------------------------|----------------------------|------------|----------------------|--------------------------|-------|-------|
|          | Percent Response         |      | Percent Response       |        | Dose             | Green Signal | Actual Pct Green Cells | Normalized Pct Green Cells | Red Signal | Actual Pct Red Cells | Normalized Pct Red Cells |       |       |
|          | concentration            |      | concentration          |        | 0.1 uM           | 1 uM         | 10 uM                  | 0.1 uM                     | 1 uM       | 10 uM                | 0.1 uM                   | 1 uM  | 10 uM |
|          | 0.1 uM                   | 1 uM | 10 uM                  | 0.1 uM | 1 uM             | 10 uM        | 0.1 uM                 | 1 uM                       | 10 uM      | 0.1 uM               | 1 uM                     | 10 uM |       |
|          | 100                      | 40   | 100                    | 0      | 0.1 uM           | 95.39        | 0.87                   | 81.83                      | 79.29      | 0.03                 | -55.16                   |       |       |
|          |                          |      |                        |        | 1 uM             | 98.55        | 0.89                   | 105.33                     | 80.48      | 0.04                 | -28.99                   |       |       |
|          |                          |      |                        |        | 10 uM            | 82.44        | 0.81                   | 1.52                       | 86.11      | 0.07                 | -22.18                   |       |       |

Compound

Normalized Values (A and B Sets)

Responses

| Wnt-C59 (C59) | Percent Green Cells (AB) |      | Percent Red Cells (AB) |        | Average Response |              |                        |                            |            |                      |                          |       |       |
|---------------|--------------------------|------|------------------------|--------|------------------|--------------|------------------------|----------------------------|------------|----------------------|--------------------------|-------|-------|
|               | Percent Response         |      | Percent Response       |        | Dose             | Green Signal | Actual Pct Green Cells | Normalized Pct Green Cells | Red Signal | Actual Pct Red Cells | Normalized Pct Red Cells |       |       |
|               | concentration            |      | concentration          |        | 0.1 uM           | 1 uM         | 10 uM                  | 0.1 uM                     | 1 uM       | 10 uM                | 0.1 uM                   | 1 uM  | 10 uM |
|               | 0.1 uM                   | 1 uM | 10 uM                  | 0.1 uM | 1 uM             | 10 uM        | 0.1 uM                 | 1 uM                       | 10 uM      | 0.1 uM               | 1 uM                     | 10 uM |       |
|               | 100                      | 100  | 100                    | 0      | 0.1 uM           | 92.77        | 0.80                   | 443.11                     | 95.96      | 0.10                 | -10.99                   |       |       |
|               |                          |      |                        |        | 1 uM             | 107.07       | 0.89                   | 127.23                     | 94.50      | 0.10                 | -17.94                   |       |       |
|               |                          |      |                        |        | 10 uM            | 104.92       | 0.89                   | 141.44                     | 110.26     | 0.13                 | 5.73                     |       |       |

Compound

Normalized Values (A and B Sets)

Responses

| WP1066 | Percent Green Cells (AB) |      | Percent Red Cells (AB) |        | Average Response |              |                        |                            |            |                      |                          |       |       |
|--------|--------------------------|------|------------------------|--------|------------------|--------------|------------------------|----------------------------|------------|----------------------|--------------------------|-------|-------|
|        | Percent Response         |      | Percent Response       |        | Dose             | Green Signal | Actual Pct Green Cells | Normalized Pct Green Cells | Red Signal | Actual Pct Red Cells | Normalized Pct Red Cells |       |       |
|        | concentration            |      | concentration          |        | 0.1 uM           | 1 uM         | 10 uM                  | 0.1 uM                     | 1 uM       | 10 uM                | 0.1 uM                   | 1 uM  | 10 uM |
|        | 0.1 uM                   | 1 uM | 10 uM                  | 0.1 uM | 1 uM             | 10 uM        | 0.1 uM                 | 1 uM                       | 10 uM      | 0.1 uM               | 1 uM                     | 10 uM |       |
|        | 100                      | 35   | 100                    | 0      | 0.1 uM           | 103.10       | 0.88                   | 79.66                      | 105.52     | 0.14                 | 8.80                     |       |       |
|        |                          |      |                        |        | 1 uM             | 97.94        | 0.84                   | 74.90                      | 84.63      | 0.04                 | -36.78                   |       |       |
|        |                          |      |                        |        | 10 uM            | 98.98        | 0.90                   | 258.51                     | 104.10     | 0.08                 | -21.62                   |       |       |

Compound

Normalized Values (A and B Sets)

Responses

| WYE-354 | Percent Green Cells (AB) |      | Percent Red Cells (AB) |        | Average Response |              |                        |                            |            |                      |                          |       |       |
|---------|--------------------------|------|------------------------|--------|------------------|--------------|------------------------|----------------------------|------------|----------------------|--------------------------|-------|-------|
|         | Percent Response         |      | Percent Response       |        | Dose             | Green Signal | Actual Pct Green Cells | Normalized Pct Green Cells | Red Signal | Actual Pct Red Cells | Normalized Pct Red Cells |       |       |
|         | concentration            |      | concentration          |        | 0.1 uM           | 1 uM         | 10 uM                  | 0.1 uM                     | 1 uM       | 10 uM                | 0.1 uM                   | 1 uM  | 10 uM |
|         | 0.1 uM                   | 1 uM | 10 uM                  | 0.1 uM | 1 uM             | 10 uM        | 0.1 uM                 | 1 uM                       | 10 uM      | 0.1 uM               | 1 uM                     | 10 uM |       |
|         | 100                      | 60   | 100                    | 0      | 0.1 uM           | 87.08        | 0.79                   | -23.35                     | 80.84      | 0.02                 | -61.95                   |       |       |
|         |                          |      |                        |        | 1 uM             | 80.04        | 0.69                   | -70.33                     | 80.00      | 0.02                 | -50.35                   |       |       |
|         |                          |      |                        |        | 10 uM            | 91.40        | 0.87                   | 93.83                      | 96.53      | 0.03                 | -40.11                   |       |       |

Compound

Normalized Values (A and B Sets)

Responses

| WYE-125132 (WYE-132) | Percent Green Cells (AB) |      | Percent Red Cells (AB) |        | Average Response |              |                        |                            |            |                      |                          |       |       |
|----------------------|--------------------------|------|------------------------|--------|------------------|--------------|------------------------|----------------------------|------------|----------------------|--------------------------|-------|-------|
|                      | Percent Response         |      | Percent Response       |        | Dose             | Green Signal | Actual Pct Green Cells | Normalized Pct Green Cells | Red Signal | Actual Pct Red Cells | Normalized Pct Red Cells |       |       |
|                      | concentration            |      | concentration          |        | 0.1 uM           | 1 uM         | 10 uM                  | 0.1 uM                     | 1 uM       | 10 uM                | 0.1 uM                   | 1 uM  | 10 uM |
|                      | 0.1 uM                   | 1 uM | 10 uM                  | 0.1 uM | 1 uM             | 10 uM        | 0.1 uM                 | 1 uM                       | 10 uM      | 0.1 uM               | 1 uM                     | 10 uM |       |
|                      | 100                      | 100  | 100                    | 0      | 0.1 uM           | 104.79       | 0.95                   | 153.54                     | 105.70     | 0.12                 | 0.73                     |       |       |
|                      |                          |      |                        |        | 1 uM             | 109.84       | 0.91                   | 115.58                     | 105.42     | 0.15                 | 9.49                     |       |       |
|                      |                          |      |                        |        | 10 uM            | 106.84       | 0.94                   | 407.92                     | 96.81      | 0.08                 | -22.66                   |       |       |

Compound

Normalized Values (A and B Sets)

Responses

| Compound | Normalized Values (A and B Sets)                                                   |                                                                                    | Average Response |              |                        |                            |            |                      |                          |
|----------|------------------------------------------------------------------------------------|------------------------------------------------------------------------------------|------------------|--------------|------------------------|----------------------------|------------|----------------------|--------------------------|
|          |                                                                                    |                                                                                    | Dose             | Green Signal | Actual Pct Green Cells | Normalized Pct Green Cells | Red Signal | Actual Pct Red Cells | Normalized Pct Red Cells |
| WZ811    | 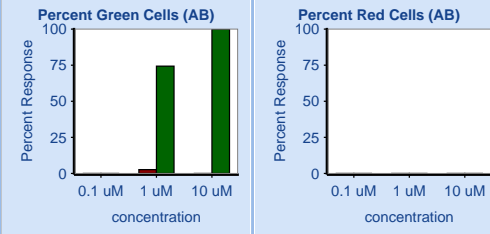 |  | 0.1 uM           | 73.64        | 0.64                   | 159.84                     | 60.20      | 0.01                 | -58.71                   |
|          |                                                                                    |                                                                                    | 1 uM             | 89.87        | 0.77                   | 38.50                      | 72.58      | 0.02                 | -59.51                   |
|          |                                                                                    |                                                                                    | 10 uM            | 98.83        | 0.86                   | 49.93                      | 59.93      | 0.00                 | -61.59                   |

Compound

Normalized Values (A and B Sets)

Responses

| Compound | Normalized Values (A and B Sets)                                                   |                                                                                    | Average Response |              |                        |                            |            |                      |                          |
|----------|------------------------------------------------------------------------------------|------------------------------------------------------------------------------------|------------------|--------------|------------------------|----------------------------|------------|----------------------|--------------------------|
|          |                                                                                    |                                                                                    | Dose             | Green Signal | Actual Pct Green Cells | Normalized Pct Green Cells | Red Signal | Actual Pct Red Cells | Normalized Pct Red Cells |
| WZ3146   | 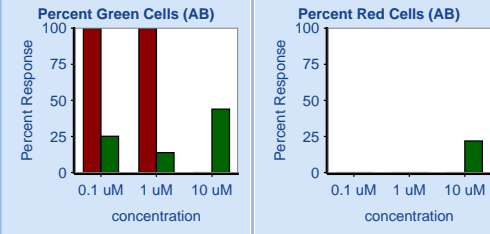 |  | 0.1 uM           | 92.69        | 0.84                   | 64.42                      | 72.28      | 0.02                 | -61.65                   |
|          |                                                                                    |                                                                                    | 1 uM             | 100.54       | 0.85                   | 93.74                      | 95.14      | 0.06                 | -28.23                   |
|          |                                                                                    |                                                                                    | 10 uM            | 103.51       | 0.62                   | -57.78                     | 104.00     | 0.12                 | 0.08                     |

Compound

Normalized Values (A and B Sets)

Responses

| Compound | Normalized Values (A and B Sets)                                                    |                                                                                     | Average Response |              |                        |                            |            |                      |                          |
|----------|-------------------------------------------------------------------------------------|-------------------------------------------------------------------------------------|------------------|--------------|------------------------|----------------------------|------------|----------------------|--------------------------|
|          |                                                                                     |                                                                                     | Dose             | Green Signal | Actual Pct Green Cells | Normalized Pct Green Cells | Red Signal | Actual Pct Red Cells | Normalized Pct Red Cells |
| WZ4002   | 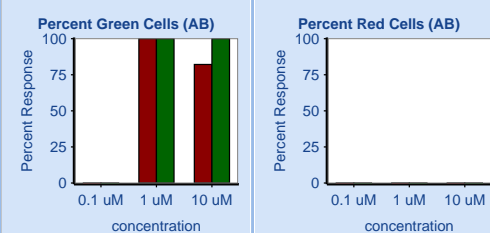 |  | 0.1 uM           | 87.20        | 0.77                   | -3.46                      | 90.55      | 0.06                 | -39.95                   |
|          |                                                                                     |                                                                                     | 1 uM             | 107.12       | 0.92                   | 128.98                     | 78.05      | 0.03                 | -44.47                   |
|          |                                                                                     |                                                                                     | 10 uM            | 100.02       | 0.87                   | 95.35                      | 93.05      | 0.03                 | -38.31                   |

Compound

Normalized Values (A and B Sets)

Responses

| Compound | Normalized Values (A and B Sets)                                                     |                                                                                      | Average Response |              |                        |                            |            |                      |                          |
|----------|--------------------------------------------------------------------------------------|--------------------------------------------------------------------------------------|------------------|--------------|------------------------|----------------------------|------------|----------------------|--------------------------|
|          |                                                                                      |                                                                                      | Dose             | Green Signal | Actual Pct Green Cells | Normalized Pct Green Cells | Red Signal | Actual Pct Red Cells | Normalized Pct Red Cells |
| WZ8040   | 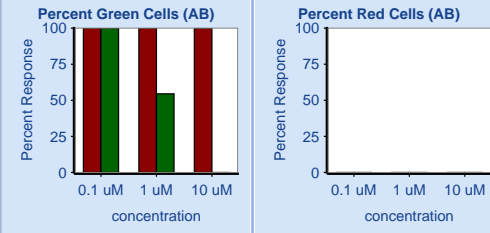 |  | 0.1 uM           | 106.24       | 0.92                   | 117.44                     | 93.53      | 0.06                 | -45.32                   |
|          |                                                                                      |                                                                                      | 1 uM             | 104.24       | 0.88                   | 109.66                     | 80.14      | 0.02                 | -47.55                   |
|          |                                                                                      |                                                                                      | 10 uM            | 96.97        | 0.82                   | 48.43                      | 90.96      | 0.02                 | -46.76                   |

Compound

Normalized Values (A and B Sets)

Responses

| Compound | Normalized Values (A and B Sets)                                                     |                                                                                      | Average Response |              |                        |                            |            |                      |                          |
|----------|--------------------------------------------------------------------------------------|--------------------------------------------------------------------------------------|------------------|--------------|------------------------|----------------------------|------------|----------------------|--------------------------|
|          |                                                                                      |                                                                                      | Dose             | Green Signal | Actual Pct Green Cells | Normalized Pct Green Cells | Red Signal | Actual Pct Red Cells | Normalized Pct Red Cells |
| XAV-939  | 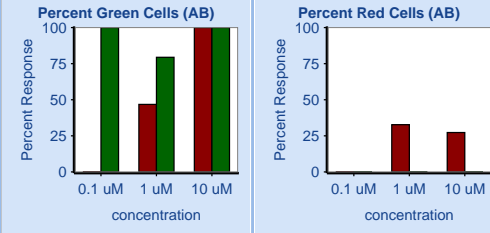 |  | 0.1 uM           | 98.41        | 0.85                   | 25.33                      | 97.34      | 0.09                 | -25.65                   |
|          |                                                                                      |                                                                                      | 1 uM             | 102.31       | 0.86                   | 63.10                      | 111.52     | 0.13                 | 0.92                     |
|          |                                                                                      |                                                                                      | 10 uM            | 109.83       | 0.91                   | 120.25                     | 102.55     | 0.11                 | -13.87                   |

Compound

Normalized Values (A and B Sets)

Responses

| XL019 | Percent Green Cells (AB) |  | Percent Red Cells (AB) |  | Average Response |              |                        |                            |            |                      |                          |
|-------|--------------------------|--|------------------------|--|------------------|--------------|------------------------|----------------------------|------------|----------------------|--------------------------|
|       | Percent Response         |  | Percent Response       |  | Dose             | Green Signal | Actual Pct Green Cells | Normalized Pct Green Cells | Red Signal | Actual Pct Red Cells | Normalized Pct Red Cells |
|       | 0.1 uM 1 uM 10 uM        |  | 0.1 uM 1 uM 10 uM      |  | 0.1 uM           | 96.01        | 0.92                   | 171.23                     | 70.43      | 0.02                 | -53.95                   |
|       | concentration            |  | concentration          |  | 1 uM             | 103.29       | 0.86                   | 106.22                     | 98.10      | 0.11                 | -12.22                   |
|       |                          |  |                        |  | 10 uM            | 83.76        | 0.69                   | -79.90                     | 104.42     | 0.13                 | 3.67                     |

Compound

Normalized Values (A and B Sets)

Responses

| XL147 | Percent Green Cells (AB) |  | Percent Red Cells (AB) |  | Average Response |              |                        |                            |            |                      |                          |
|-------|--------------------------|--|------------------------|--|------------------|--------------|------------------------|----------------------------|------------|----------------------|--------------------------|
|       | Percent Response         |  | Percent Response       |  | Dose             | Green Signal | Actual Pct Green Cells | Normalized Pct Green Cells | Red Signal | Actual Pct Red Cells | Normalized Pct Red Cells |
|       | 0.1 uM 1 uM 10 uM        |  | 0.1 uM 1 uM 10 uM      |  | 0.1 uM           | 100.02       | 0.90                   | 95.74                      | 80.59      | 0.03                 | -56.35                   |
|       | concentration            |  | concentration          |  | 1 uM             | 94.41        | 0.82                   | -19.23                     | 107.94     | 0.11                 | -7.50                    |
|       |                          |  |                        |  | 10 uM            | 102.30       | 0.89                   | 108.70                     | 102.03     | 0.06                 | -28.01                   |

Compound

Normalized Values (A and B Sets)

Responses

| XL335 | Percent Green Cells (AB) |  | Percent Red Cells (AB) |  | Average Response |              |                        |                            |            |                      |                          |
|-------|--------------------------|--|------------------------|--|------------------|--------------|------------------------|----------------------------|------------|----------------------|--------------------------|
|       | Percent Response         |  | Percent Response       |  | Dose             | Green Signal | Actual Pct Green Cells | Normalized Pct Green Cells | Red Signal | Actual Pct Red Cells | Normalized Pct Red Cells |
|       | 0.1 uM 1 uM 10 uM        |  | 0.1 uM 1 uM 10 uM      |  | 0.1 uM           | 99.27        | 0.88                   | 85.25                      | 104.99     | 0.16                 | 17.15                    |
|       | concentration            |  | concentration          |  | 1 uM             | 96.50        | 0.76                   | 44.66                      | 102.89     | 0.13                 | 1.39                     |
|       |                          |  |                        |  | 10 uM            | 110.17       | 0.95                   | 441.62                     | 105.49     | 0.12                 | -3.41                    |

Compound

Normalized Values (A and B Sets)

Responses

| XL388 | Percent Green Cells (AB) |  | Percent Red Cells (AB) |  | Average Response |              |                        |                            |            |                      |                          |
|-------|--------------------------|--|------------------------|--|------------------|--------------|------------------------|----------------------------|------------|----------------------|--------------------------|
|       | Percent Response         |  | Percent Response       |  | Dose             | Green Signal | Actual Pct Green Cells | Normalized Pct Green Cells | Red Signal | Actual Pct Red Cells | Normalized Pct Red Cells |
|       | 0.1 uM 1 uM 10 uM        |  | 0.1 uM 1 uM 10 uM      |  | 0.1 uM           | 107.09       | 0.92                   | 250.95                     | 77.79      | 0.04                 | -44.91                   |
|       | concentration            |  | concentration          |  | 1 uM             | 88.51        | 0.72                   | 3.12                       | 79.35      | 0.05                 | -40.30                   |
|       |                          |  |                        |  | 10 uM            | 104.41       | 0.91                   | 145.66                     | 93.69      | 0.08                 | -19.34                   |

Compound

Normalized Values (A and B Sets)

Responses

| XL888 | Percent Green Cells (AB) |  | Percent Red Cells (AB) |  | Average Response |              |                        |                            |            |                      |                          |
|-------|--------------------------|--|------------------------|--|------------------|--------------|------------------------|----------------------------|------------|----------------------|--------------------------|
|       | Percent Response         |  | Percent Response       |  | Dose             | Green Signal | Actual Pct Green Cells | Normalized Pct Green Cells | Red Signal | Actual Pct Red Cells | Normalized Pct Red Cells |
|       | 0.1 uM 1 uM 10 uM        |  | 0.1 uM 1 uM 10 uM      |  | 0.1 uM           | 128.25       | 0.89                   | 50.16                      | 108.87     | 0.16                 | 17.87                    |
|       | concentration            |  | concentration          |  | 1 uM             | 109.87       | 0.81                   | 68.32                      | 93.21      | 0.16                 | 14.15                    |
|       |                          |  |                        |  | 10 uM            | 117.83       | 0.91                   | 114.59                     | 100.83     | 0.10                 | -9.18                    |

Compound

Normalized Values (A and B Sets)

Responses

| Xylazine HCl | Percent Green Cells (AB) |      | Percent Red Cells (AB) |        | Average Response |              |                        |                            |            |                      |                          |       |       |
|--------------|--------------------------|------|------------------------|--------|------------------|--------------|------------------------|----------------------------|------------|----------------------|--------------------------|-------|-------|
|              | Percent Response         |      | Percent Response       |        | Dose             | Green Signal | Actual Pct Green Cells | Normalized Pct Green Cells | Red Signal | Actual Pct Red Cells | Normalized Pct Red Cells |       |       |
|              | concentration            |      | concentration          |        | 0.1 uM           | 1 uM         | 10 uM                  | 0.1 uM                     | 1 uM       | 10 uM                | 0.1 uM                   | 1 uM  | 10 uM |
|              | 0.1 uM                   | 1 uM | 10 uM                  | 0.1 uM | 1 uM             | 10 uM        | 0.1 uM                 | 1 uM                       | 10 uM      | 0.1 uM               | 1 uM                     | 10 uM |       |
|              | 100                      | 20   | 85                     | 0      | 81.17            | 0.68         | -72.95                 | 87.53                      | 0.05       | -41.46               |                          |       |       |
|              | 89.90                    | 0.82 | 196.07                 | 105.61 | 0.15             | 8.52         |                        |                            |            |                      |                          |       |       |
|              | 82.34                    | 0.71 | -83.92                 | 86.47  | 0.08             | -13.74       |                        |                            |            |                      |                          |       |       |

Compound

Normalized Values (A and B Sets)

Responses

| Y-27632 2HCl | Percent Green Cells (AB) |      | Percent Red Cells (AB) |        | Average Response |              |                        |                            |            |                      |                          |       |       |
|--------------|--------------------------|------|------------------------|--------|------------------|--------------|------------------------|----------------------------|------------|----------------------|--------------------------|-------|-------|
|              | Percent Response         |      | Percent Response       |        | Dose             | Green Signal | Actual Pct Green Cells | Normalized Pct Green Cells | Red Signal | Actual Pct Red Cells | Normalized Pct Red Cells |       |       |
|              | concentration            |      | concentration          |        | 0.1 uM           | 1 uM         | 10 uM                  | 0.1 uM                     | 1 uM       | 10 uM                | 0.1 uM                   | 1 uM  | 10 uM |
|              | 0.1 uM                   | 1 uM | 10 uM                  | 0.1 uM | 1 uM             | 10 uM        | 0.1 uM                 | 1 uM                       | 10 uM      | 0.1 uM               | 1 uM                     | 10 uM |       |
|              | 50                       | 75   | 100                    | 0      | 88.74            | 0.79         | -15.39                 | 85.53                      | 0.05       | -45.82               |                          |       |       |
|              | 91.94                    | 0.82 | 45.97                  | 101.44 | 0.06             | -27.69       |                        |                            |            |                      |                          |       |       |
|              | 95.56                    | 0.80 | 54.46                  | 99.26  | 0.06             | -24.95       |                        |                            |            |                      |                          |       |       |

Compound

Normalized Values (A and B Sets)

Responses

| YM155 (Sepantronium Bromide) | Percent Green Cells (AB) |      | Percent Red Cells (AB) |        | Average Response |              |                        |                            |            |                      |                          |       |       |
|------------------------------|--------------------------|------|------------------------|--------|------------------|--------------|------------------------|----------------------------|------------|----------------------|--------------------------|-------|-------|
|                              | Percent Response         |      | Percent Response       |        | Dose             | Green Signal | Actual Pct Green Cells | Normalized Pct Green Cells | Red Signal | Actual Pct Red Cells | Normalized Pct Red Cells |       |       |
|                              | concentration            |      | concentration          |        | 0.1 uM           | 1 uM         | 10 uM                  | 0.1 uM                     | 1 uM       | 10 uM                | 0.1 uM                   | 1 uM  | 10 uM |
|                              | 0.1 uM                   | 1 uM | 10 uM                  | 0.1 uM | 1 uM             | 10 uM        | 0.1 uM                 | 1 uM                       | 10 uM      | 0.1 uM               | 1 uM                     | 10 uM |       |
|                              | 100                      | 100  | 25                     | 100    | 106.55           | 0.95         | 130.30                 | 99.01                      | 0.04       | -55.10               |                          |       |       |
|                              | 95.57                    | 0.85 | 72.24                  | 83.78  | 0.03             | -44.81       |                        |                            |            |                      |                          |       |       |
|                              | 101.60                   | 0.88 | 104.40                 | 99.56  | 0.05             | -30.26       |                        |                            |            |                      |                          |       |       |

Compound

Normalized Values (A and B Sets)

Responses

| YO-01027 | Percent Green Cells (AB) |      | Percent Red Cells (AB) |        | Average Response |              |                        |                            |            |                      |                          |       |       |
|----------|--------------------------|------|------------------------|--------|------------------|--------------|------------------------|----------------------------|------------|----------------------|--------------------------|-------|-------|
|          | Percent Response         |      | Percent Response       |        | Dose             | Green Signal | Actual Pct Green Cells | Normalized Pct Green Cells | Red Signal | Actual Pct Red Cells | Normalized Pct Red Cells |       |       |
|          | concentration            |      | concentration          |        | 0.1 uM           | 1 uM         | 10 uM                  | 0.1 uM                     | 1 uM       | 10 uM                | 0.1 uM                   | 1 uM  | 10 uM |
|          | 0.1 uM                   | 1 uM | 10 uM                  | 0.1 uM | 1 uM             | 10 uM        | 0.1 uM                 | 1 uM                       | 10 uM      | 0.1 uM               | 1 uM                     | 10 uM |       |
|          | 100                      | 100  | 100                    | 100    | 104.68           | 0.92         | 132.30                 | 126.72                     | 0.25       | 62.32                |                          |       |       |
|          | 114.36                   | 0.92 | 119.68                 | 98.55  | 0.12             | -2.15        |                        |                            |            |                      |                          |       |       |
|          | 111.98                   | 0.95 | 334.78                 | 121.27 | 0.19             | 32.78        |                        |                            |            |                      |                          |       |       |

Compound

Normalized Values (A and B Sets)

Responses

| Z-VAD-FMK | Percent Green Cells (AB) |      | Percent Red Cells (AB) |        | Average Response |              |                        |                            |            |                      |                          |       |       |
|-----------|--------------------------|------|------------------------|--------|------------------|--------------|------------------------|----------------------------|------------|----------------------|--------------------------|-------|-------|
|           | Percent Response         |      | Percent Response       |        | Dose             | Green Signal | Actual Pct Green Cells | Normalized Pct Green Cells | Red Signal | Actual Pct Red Cells | Normalized Pct Red Cells |       |       |
|           | concentration            |      | concentration          |        | 0.1 uM           | 1 uM         | 10 uM                  | 0.1 uM                     | 1 uM       | 10 uM                | 0.1 uM                   | 1 uM  | 10 uM |
|           | 0.1 uM                   | 1 uM | 10 uM                  | 0.1 uM | 1 uM             | 10 uM        | 0.1 uM                 | 1 uM                       | 10 uM      | 0.1 uM               | 1 uM                     | 10 uM |       |
|           | 70                       | 75   | 65                     | 40     | 96.57            | 0.86         | 73.95                  | 93.54                      | 0.08       | -27.19               |                          |       |       |
|           | 88.80                    | 0.78 | 596.59                 | 99.99  | 0.14             | 2.33         |                        |                            |            |                      |                          |       |       |
|           | 94.24                    | 0.87 | 52.05                  | 99.16  | 0.13             | 7.64         |                        |                            |            |                      |                          |       |       |

Compound

Normalized Values (A and B Sets)

Responses

| Zaltoprofen |       |      | Average Response |              |                        |                            |            |                      |                          |
|-------------|-------|------|------------------|--------------|------------------------|----------------------------|------------|----------------------|--------------------------|
|             |       |      | Dose             | Green Signal | Actual Pct Green Cells | Normalized Pct Green Cells | Red Signal | Actual Pct Red Cells | Normalized Pct Red Cells |
|             |       |      | 0.1 uM           | 89.64        | 0.87                   | 138.57                     | 82.22      | 0.04                 | -40.48                   |
|             |       |      | 1 uM             | 91.03        | 0.76                   | 23.32                      | 83.18      | 0.04                 | -48.99                   |
| 10 uM       | 84.83 | 0.71 | -29.74           | 76.27        | 0.03                   | -46.38                     |            |                      |                          |

Compound

Normalized Values (A and B Sets)

Responses

| Zanamivir |       |      | Average Response |              |                        |                            |            |                      |                          |        |
|-----------|-------|------|------------------|--------------|------------------------|----------------------------|------------|----------------------|--------------------------|--------|
|           |       |      | Dose             | Green Signal | Actual Pct Green Cells | Normalized Pct Green Cells | Red Signal | Actual Pct Red Cells | Normalized Pct Red Cells |        |
|           |       |      | 0.1 uM           | 82.34        | 0.76                   | -                          | 120.15     | 65.40                | 0.01                     | -58.94 |
|           |       |      | 1 uM             | 68.48        | 0.51                   | -                          | 167.85     | 73.71                | 0.02                     | -56.17 |
| 10 uM     | 88.93 | 0.78 | 37.02            | 89.79        | 0.06                   | -32.98                     |            |                      |                          |        |

Compound

Normalized Values (A and B Sets)

Responses

| ZCL278 |       |      | Average Response |              |                        |                            |            |                      |                          |
|--------|-------|------|------------------|--------------|------------------------|----------------------------|------------|----------------------|--------------------------|
|        |       |      | Dose             | Green Signal | Actual Pct Green Cells | Normalized Pct Green Cells | Red Signal | Actual Pct Red Cells | Normalized Pct Red Cells |
|        |       |      | 0.1 uM           | 85.00        | 0.77                   | -5.89                      | 76.38      | 0.02                 | -62.37                   |
|        |       |      | 1 uM             | 87.64        | 0.81                   | -                          | 153.67     | 79.76                | 0.04                     |
| 10 uM  | 96.19 | 0.93 | 114.12           | 72.48        | 0.04                   | -33.02                     |            |                      |                          |

Compound

Normalized Values (A and B Sets)

Responses

| Zebularine |       |      | Average Response |              |                        |                            |            |                      |                          |        |
|------------|-------|------|------------------|--------------|------------------------|----------------------------|------------|----------------------|--------------------------|--------|
|            |       |      | Dose             | Green Signal | Actual Pct Green Cells | Normalized Pct Green Cells | Red Signal | Actual Pct Red Cells | Normalized Pct Red Cells |        |
|            |       |      | 0.1 uM           | 85.39        | 0.82                   | -                          | 219.80     | 73.39                | 0.03                     | -49.49 |
|            |       |      | 1 uM             | 103.61       | 0.81                   | 69.38                      | 84.61      | 0.07                 | -31.98                   |        |
| 10 uM      | 92.23 | 0.81 | 40.17            | 104.25       | 0.12                   | -2.05                      |            |                      |                          |        |

Compound

Normalized Values (A and B Sets)

Responses

| Zibotentan (ZD4054) | Average Response |              |                        |                            |            |                      |                          |
|---------------------|------------------|--------------|------------------------|----------------------------|------------|----------------------|--------------------------|
|                     | Dose             | Green Signal | Actual Pct Green Cells | Normalized Pct Green Cells | Red Signal | Actual Pct Red Cells | Normalized Pct Red Cells |
|                     | 0.1 uM           | 100.64       | 0.88                   | 71.68                      | 115.57     | 0.14                 | 6.73                     |

Compound

Normalized Values (A and B Sets)

Responses

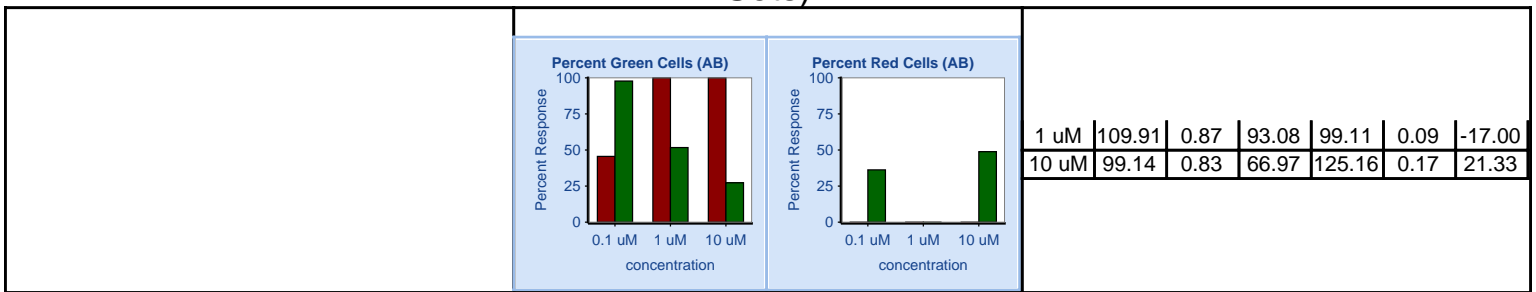

Compound

Normalized Values (A and B Sets)

Responses

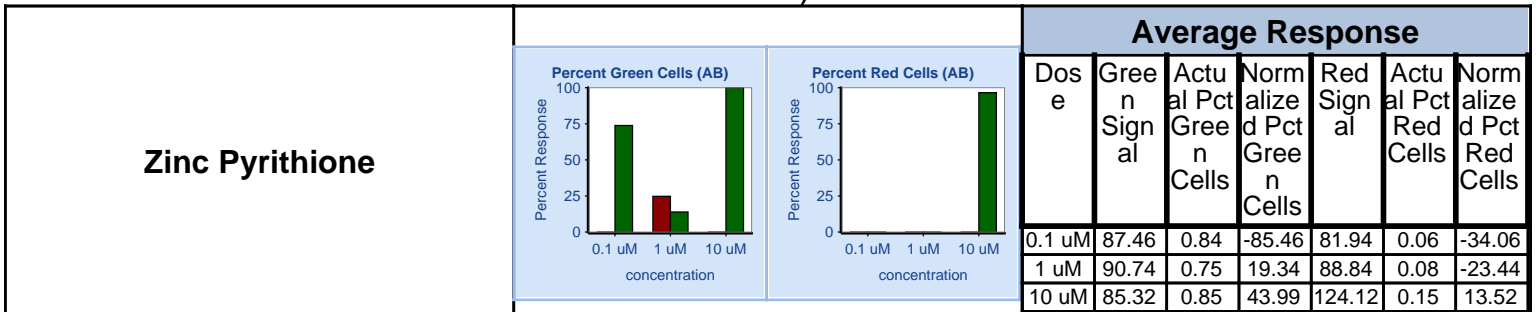

Compound

Normalized Values (A and B Sets)

Responses

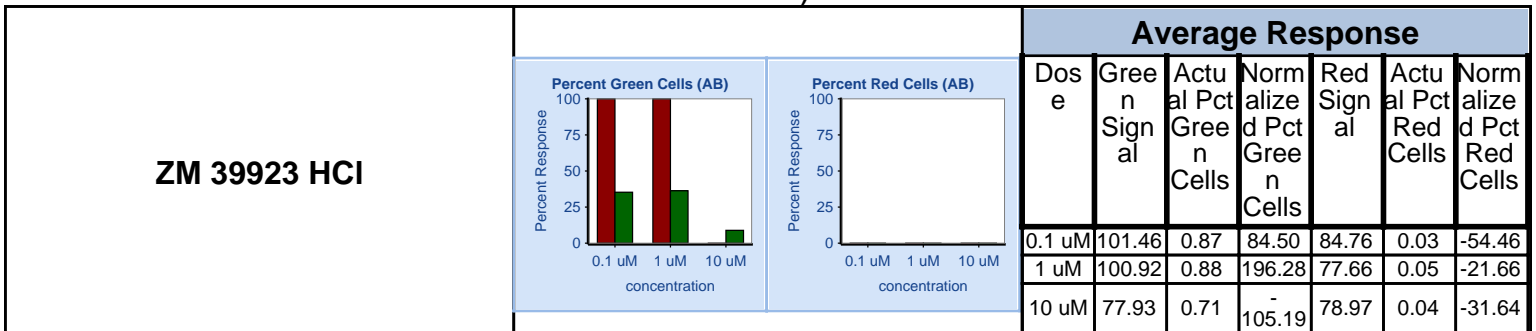

Compound

Normalized Values (A and B Sets)

Responses

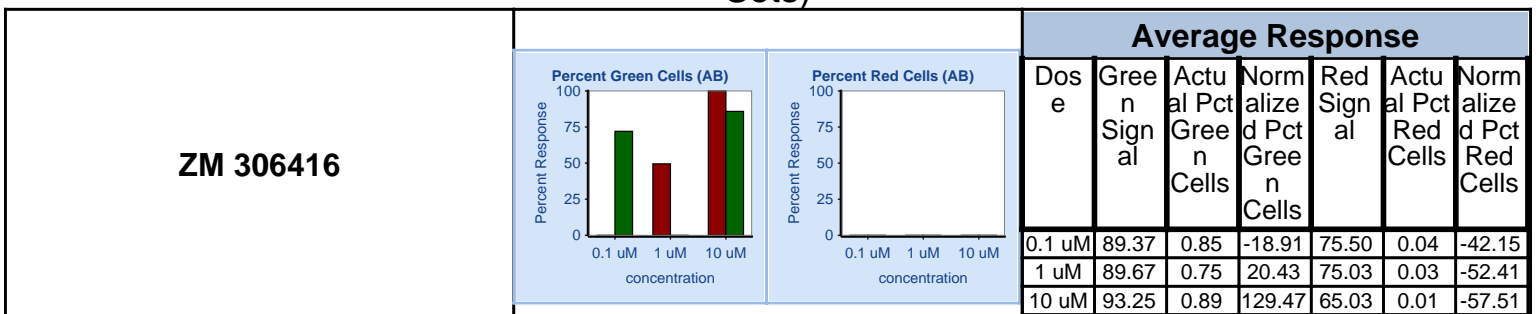

Compound

Normalized Values (A and B Sets)

Responses

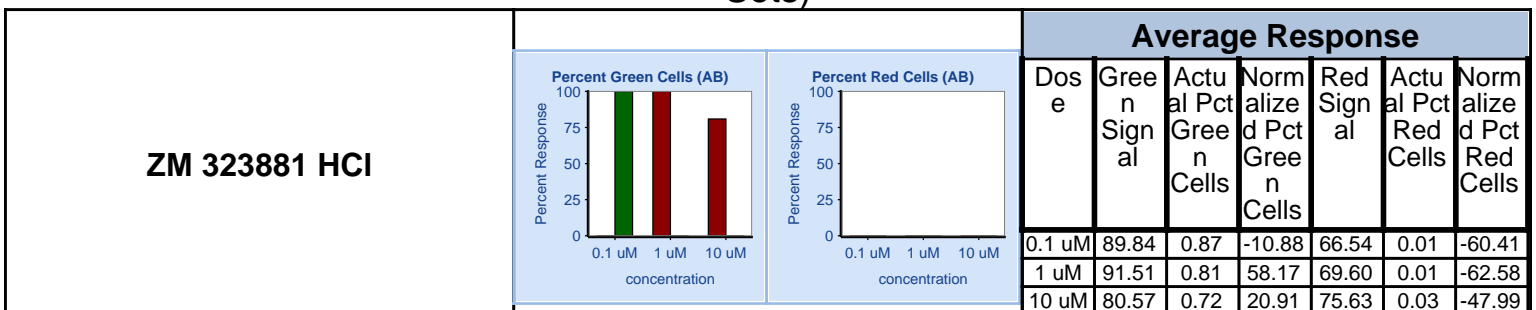

ZM 323881 HCl

Compound

Normalized Values (A and B Sets)

Responses

| <b>ZM 336372</b> |       |      | Average Response |              |                        |                            |            |                      |                          |
|------------------|-------|------|------------------|--------------|------------------------|----------------------------|------------|----------------------|--------------------------|
|                  |       |      | Dose             | Green Signal | Actual Pct Green Cells | Normalized Pct Green Cells | Red Signal | Actual Pct Red Cells | Normalized Pct Red Cells |
|                  |       |      | 0.1 uM           | 67.90        | 0.51                   | 217.92                     | 71.17      | 0.01                 | -66.85                   |
|                  |       |      | 1 uM             | 86.25        | 0.78                   | 472.55                     | 107.34     | 0.20                 | 71.09                    |
| 10 uM            | 91.01 | 0.88 | 62.34            | 85.31        | 0.08                   | -14.60                     |            |                      |                          |

Compound

Normalized Values (A and B Sets)

Responses

| <b>Zosuquidar (LY335979) 3HCl</b> |        |      | Average Response |              |                        |                            |            |                      |                          |
|-----------------------------------|--------|------|------------------|--------------|------------------------|----------------------------|------------|----------------------|--------------------------|
|                                   |        |      | Dose             | Green Signal | Actual Pct Green Cells | Normalized Pct Green Cells | Red Signal | Actual Pct Red Cells | Normalized Pct Red Cells |
|                                   |        |      | 0.1 uM           | 89.67        | 0.80                   | 12.21                      | 95.09      | 0.06                 | -37.50                   |
|                                   |        |      | 1 uM             | 112.10       | 0.90                   | 114.86                     | 93.24      | 0.07                 | -26.34                   |
| 10 uM                             | 111.38 | 0.92 | 126.47           | 117.14       | 0.12                   | -0.80                      |            |                      |                          |
