# Supplementary material for: GSK3β regulates epithelial-mesenchymal transition and cancer stem cell properties in triple-negative breast cancer
Source: Springer Nature journal article supplement (doi:10.1186/s13058-019-1125-0), 2019-03-07

# Supplementary Figure 4

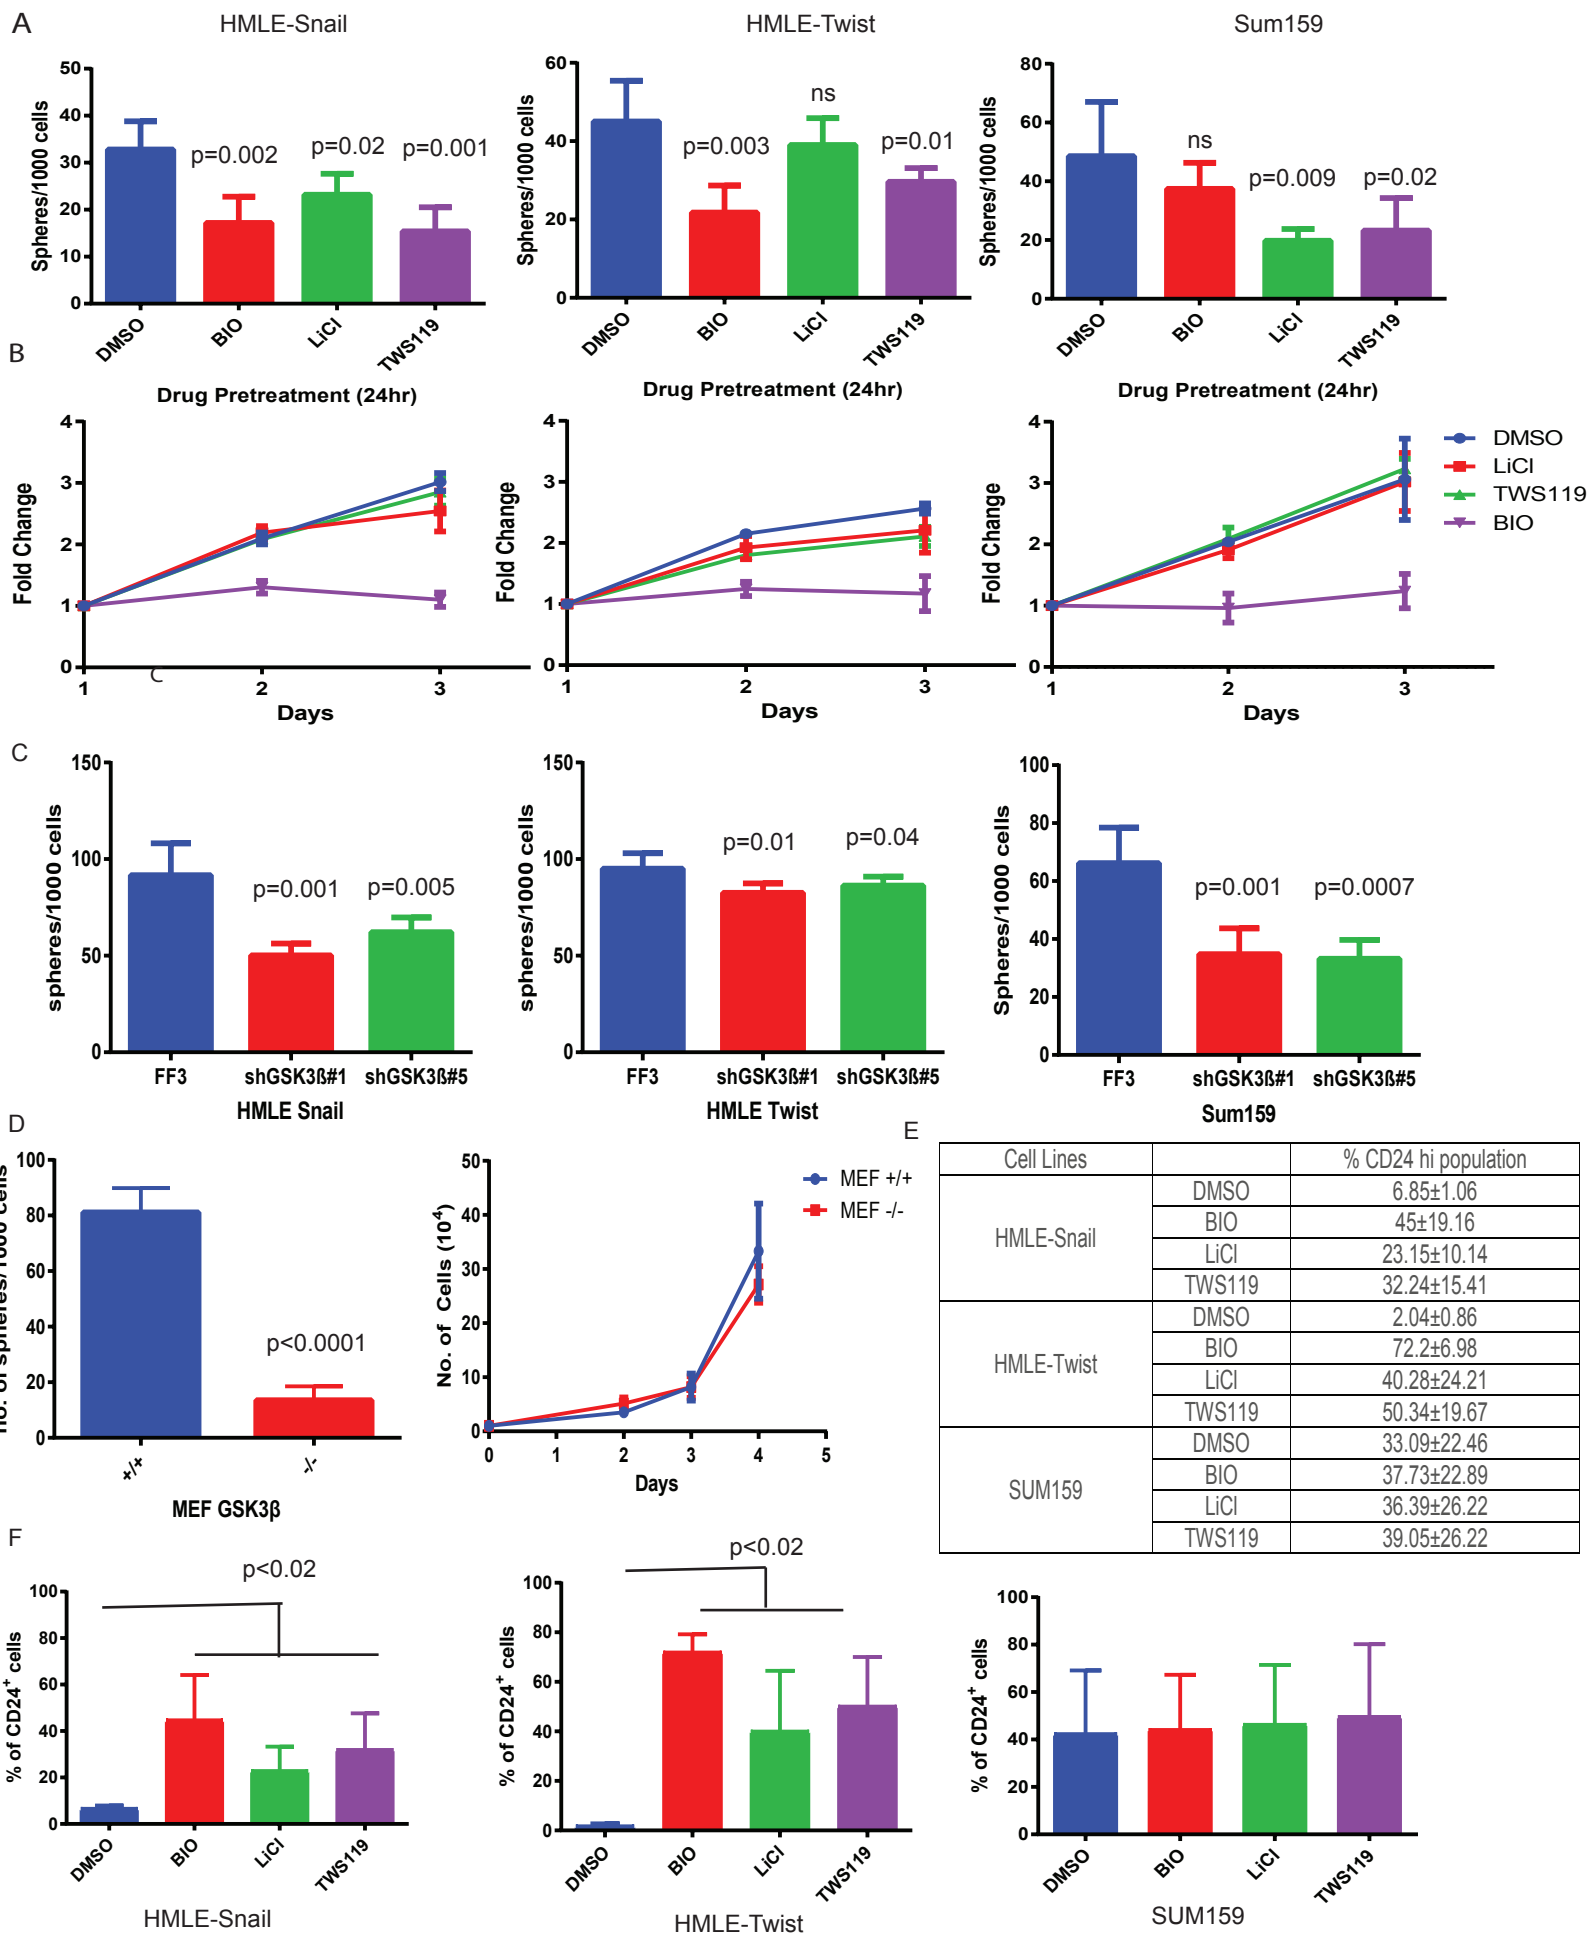

Supplement: MOESM6 [file 16532720]
